# Supplementary material for: De novo transcriptome of the cosmopolitan dinoflagellate Amphidinium carterae to identify enzymes with biotechnological potential
Source: PubMed Central journal article supplement (PMC5601461; doi:10.1038/s41598-017-12092-1), 2017-09-15
Supplement: 41598_2017_12092_MOESM1_ESM.pdf [file 41598_2017_12092_MOESM1_ESM.pdf]

## Supplementary Information

### ***De novo* transcriptome of the cosmopolitan dinoflagellate *Amphidinium carterae* to identify enzymes with biotechnological potential**

Lauritano Chiara, De Luca Daniele, Ferrarini Alberto, Avanzato Carla, Minio Andrea, Esposito Francesco, Ianora Adrianna

**Supplementary Figure S1. Maximum likelihood tree for  $\beta$ -ketosynthase gene.**

Colours on the branches refer to the taxonomic group as follows:

— Amebozoa, — Animalia, — Chlorophyta, — Fungi, and — SAR (Stramenopiles-Alveolates-Rhizaria).

Colours in the circles indicate the bootstrap support to each node (< 60% in red, < 82% in green, and > 87% in blue), with colour intensity increasing with bootstrap value.

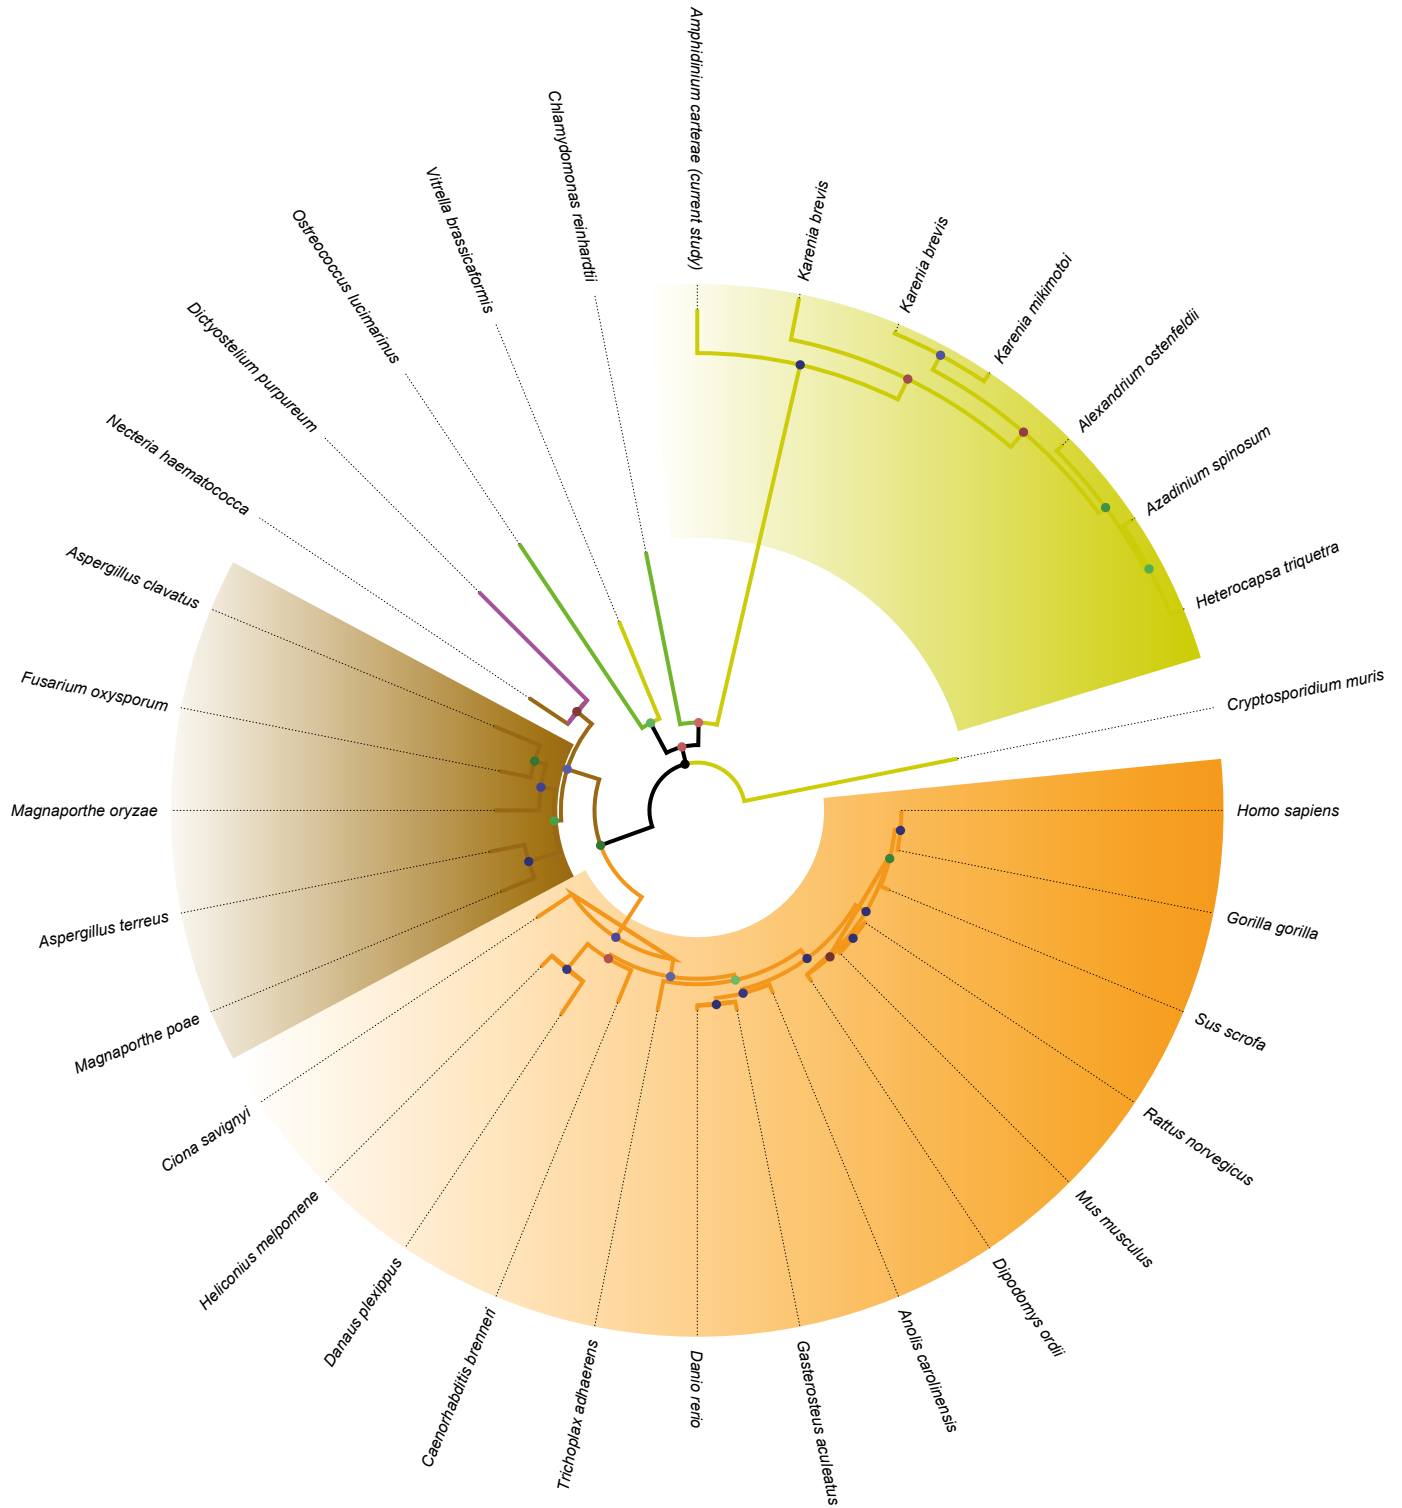

**Supplementary Figure S2. Maximum likelihood tree for L-asparaginase gene.** Colours on the branches refer to the taxonomic group as follows:

— Amebozoa, — Animalia, — Bacteria, — Chlorophyta, — Fungi, and — SAR (Stramenopiles-Alveolates-Rhizaria).

Colours in the circles indicate the bootstrap support to each node (< 51% in red, < 83% in green, and > 85% in blue), with colour intensity increasing with bootstrap value.

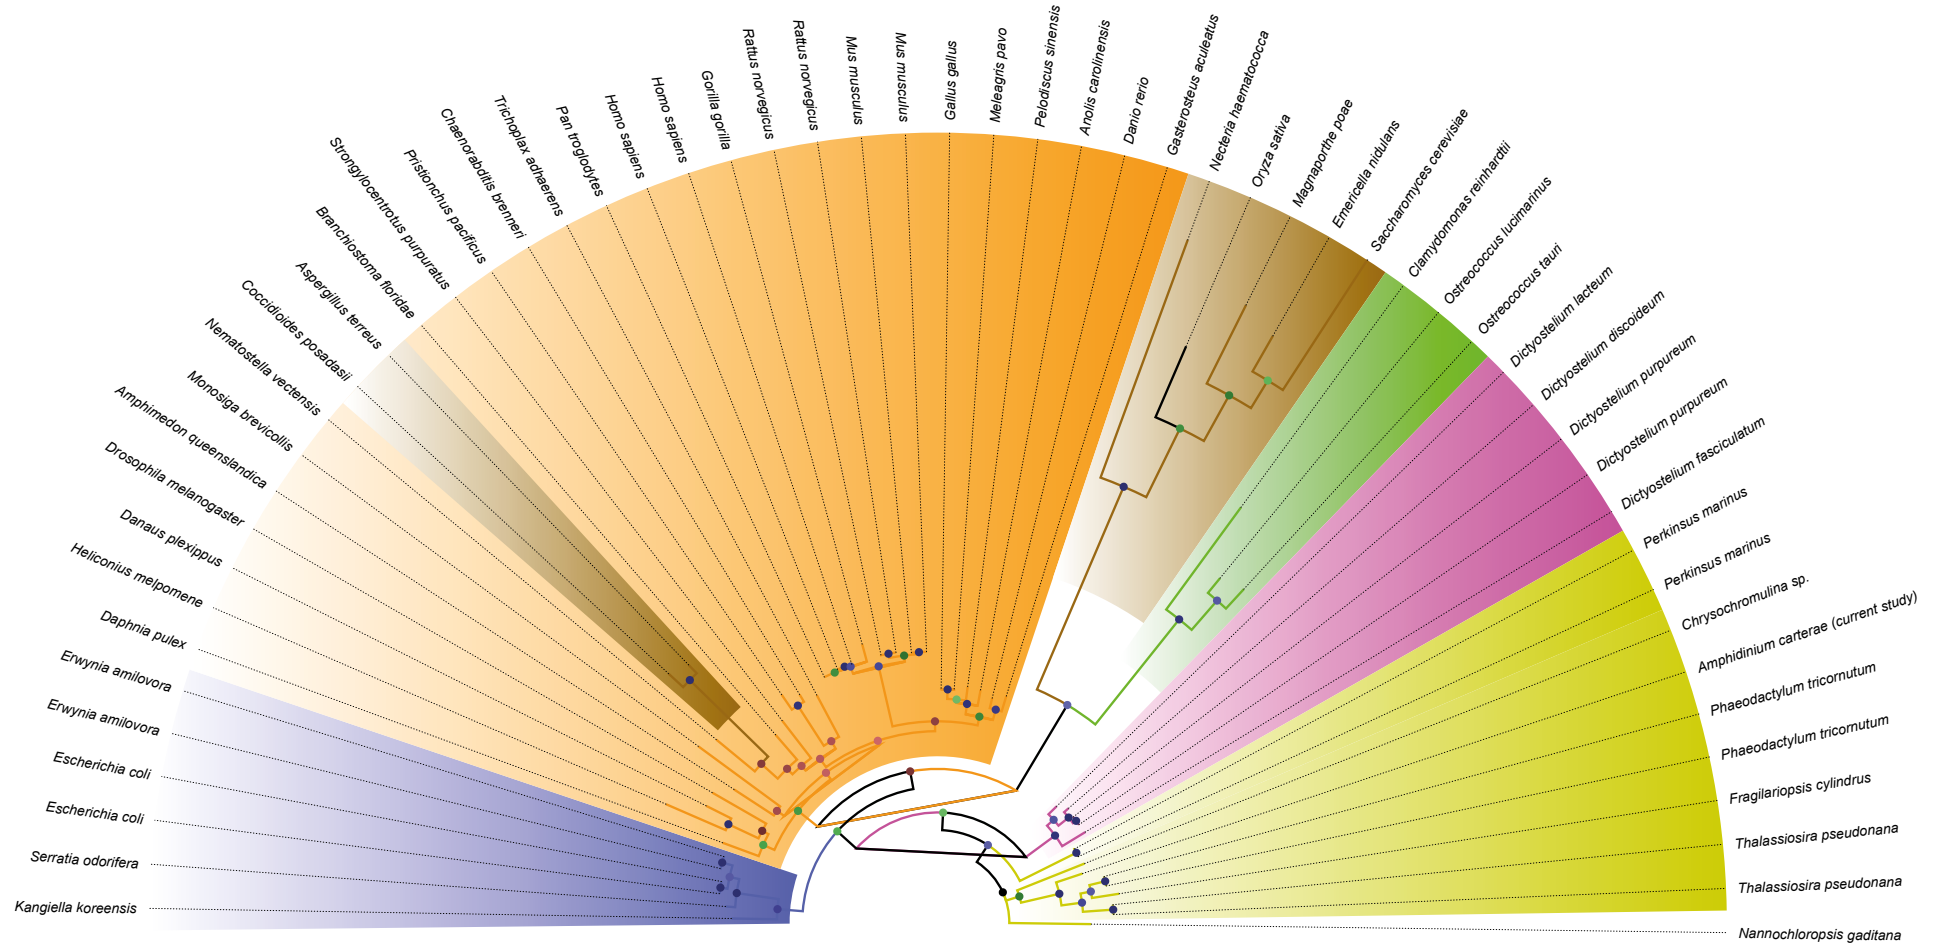

**Supplementary Figure S3. Maximum likelihood tree for cellulase gene.** Colours on the branches refer to the taxonomic group as follows:

— Amebozoa, — Animalia, — Fungi, and — SAR (Stramenopiles-Alveolates-Rhizaria).

Colours in the circles indicate the bootstrap support to each node (< 54% in red, < 84% in green, and > 89% in blue), with colour intensity increasing with bootstrap value.

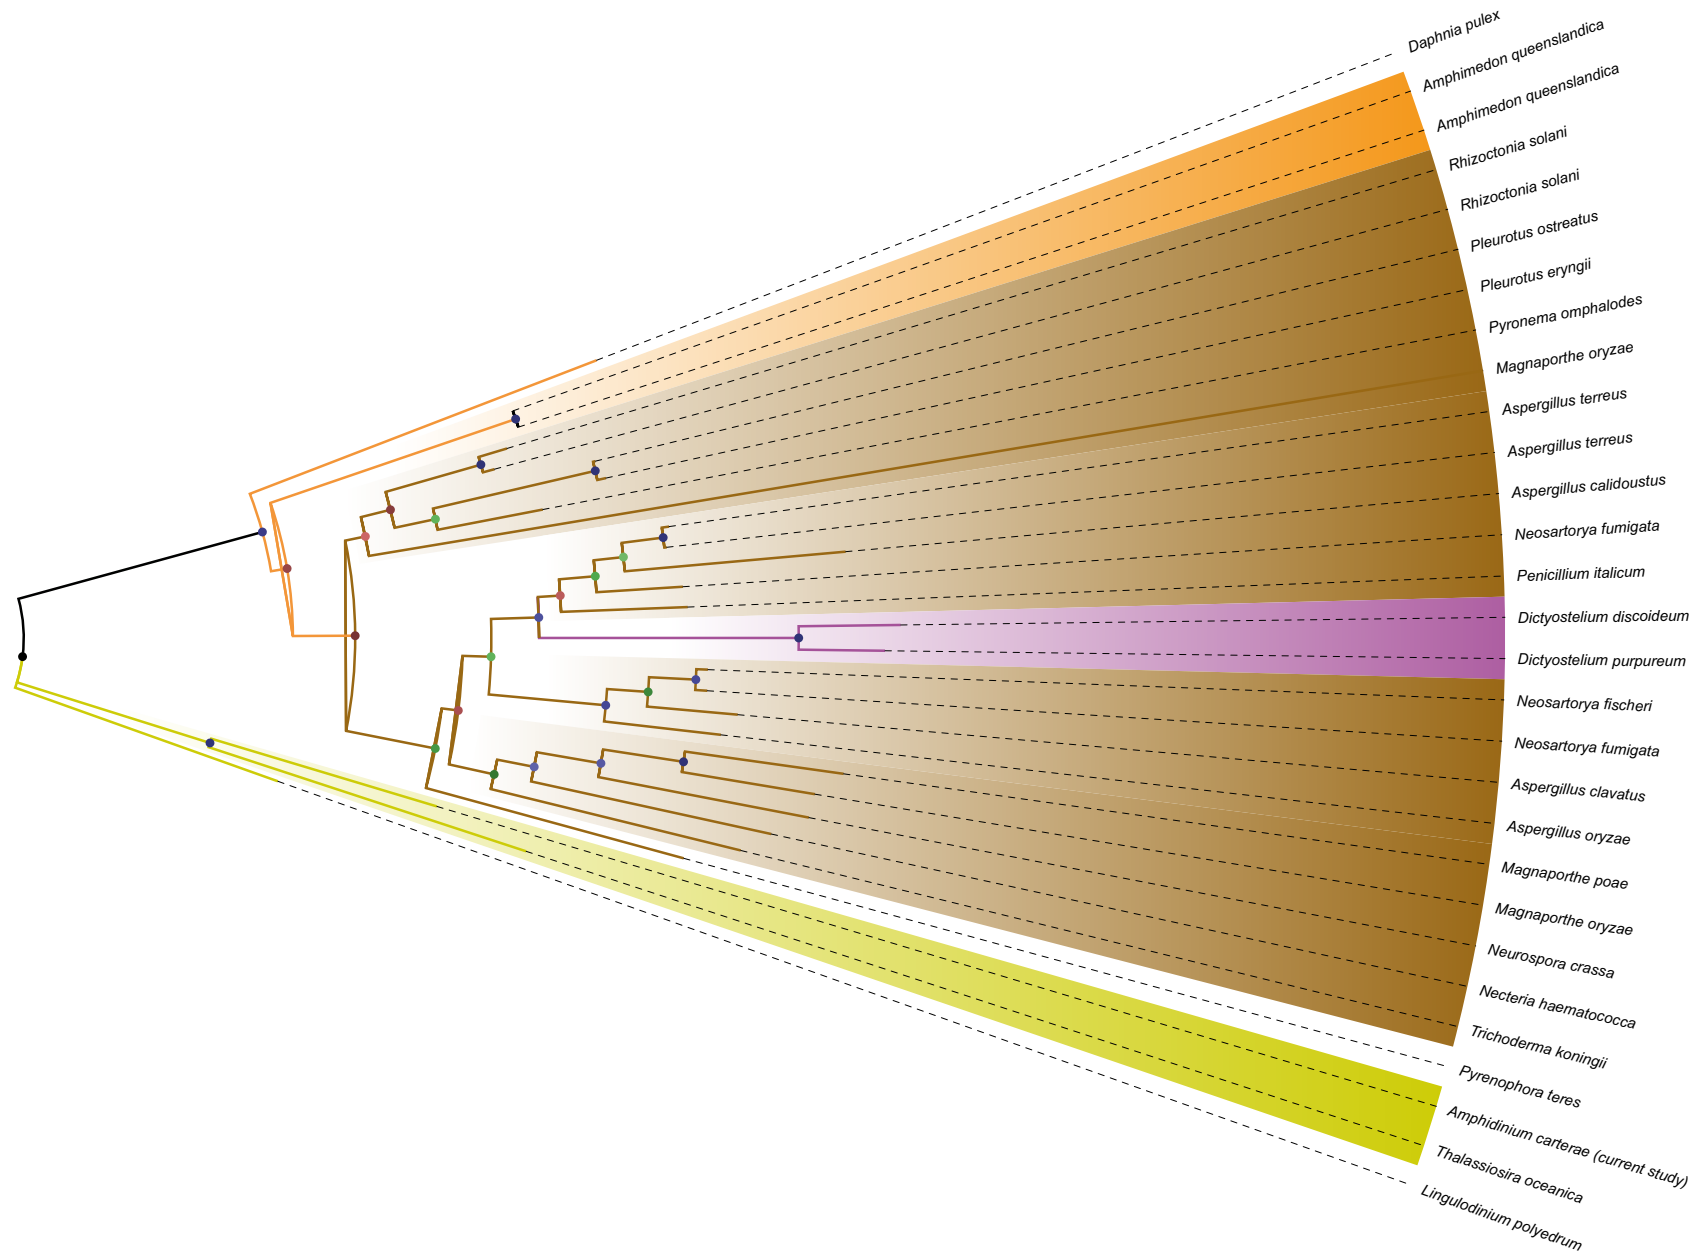

**Supplementary Figure S4. Combined *de novo* transcriptome assembly workflow.** The number of sequences produced by each step is reported in the boxes .

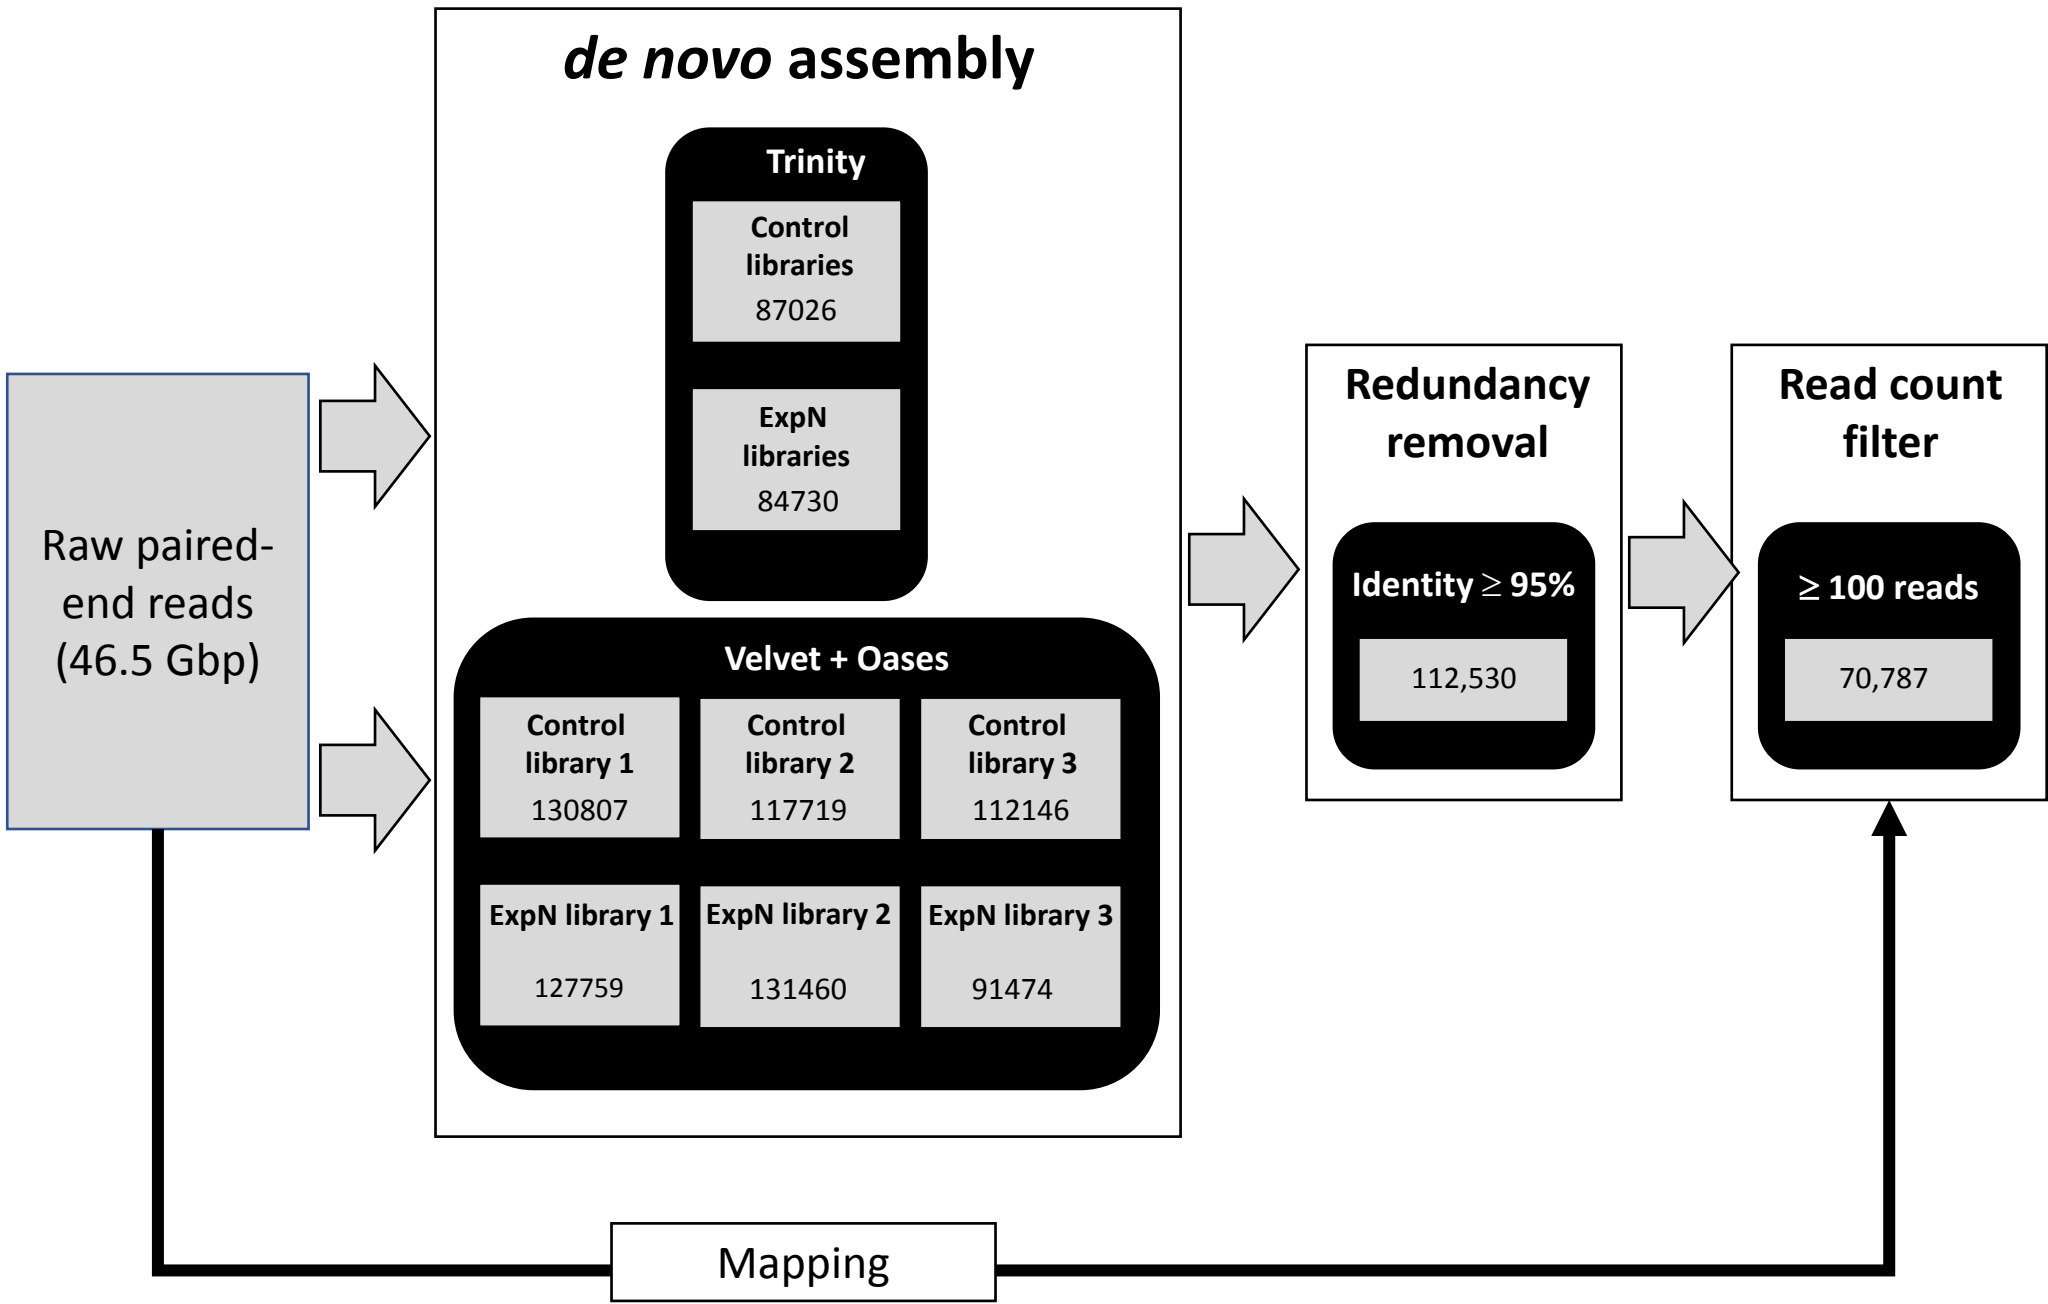

**Supplementary Figure S5. Reference gene assessment.** Ranking of the best reference genes (RGs). a) The NormFinder algorithm ranks the candidate RGs according to their expression stability. Lower stability values indicate more-stable genes. b) The stepwise exclusion of more-variable genes using the geNorm program. More stable genes with the lowest average expression stability value are indicated by the arrow (Vandesompele et al., 2002). c) Ranking of the best RGs based on standard deviation of the Ct values given by BestKeeper. Abbreviations used are: Ubiquitin (UB), cyclin-dependent kinase a-1 (CDK), alpha- and beta-tubulins (ATUB and BTUB, respectively) and glyceraldehyde-3-phosphate dehydrogenase (GAPDH).

a) NormFinder

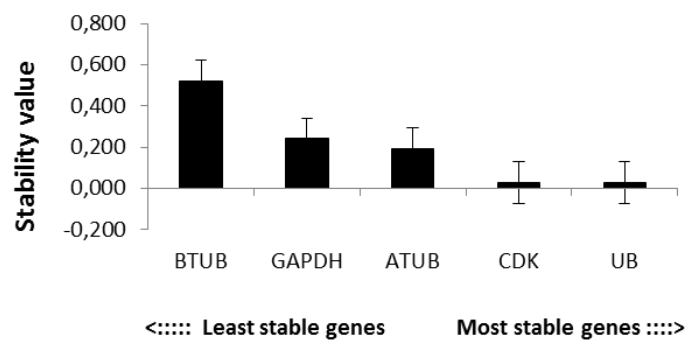

b) GeNorm

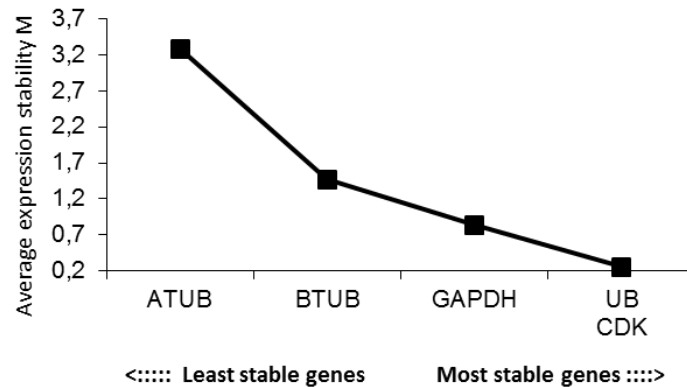

c) BestKeeper

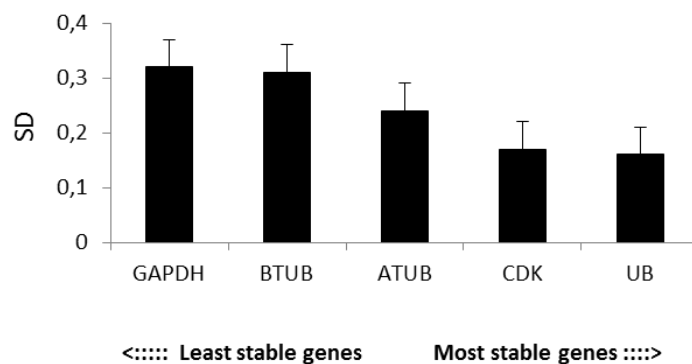

**Supplementary Figure S6. SignalP V4.1 graphic output for cellulase.** The values of the C-score (raw cleavage site score), S-score (signal peptide score) and Y-score (combination of the C- and S-scores, resulting in a better cleavage site prediction) are shown for each position in the sequence. The C-score is defined to be high for the position immediately after the cleavage site, i.e. the first position in the mature protein.

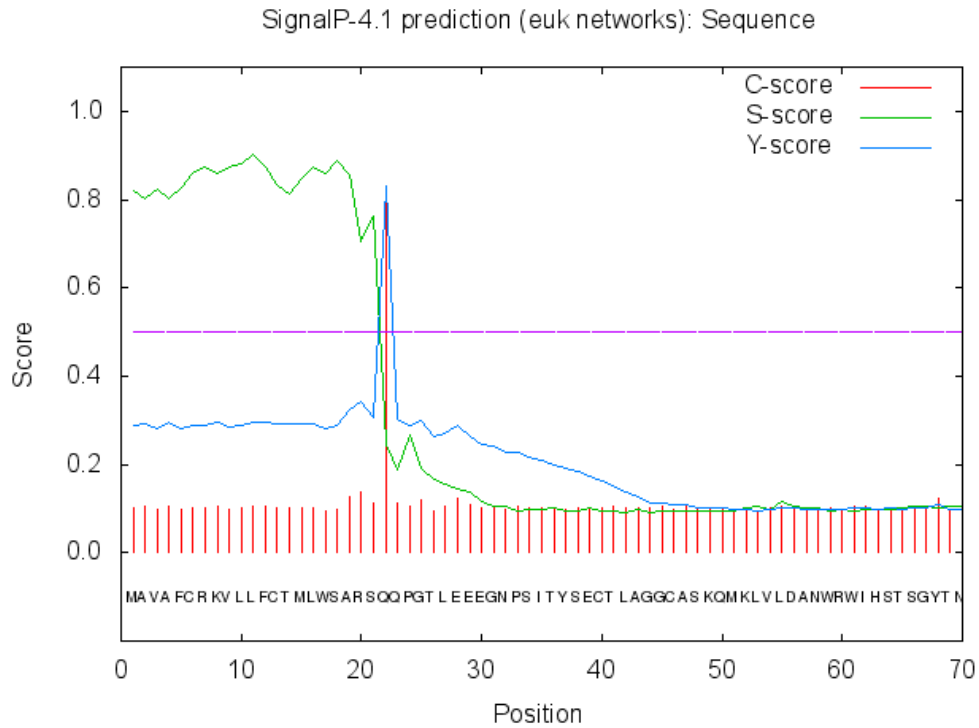

**Supplementary Table S1. List of the sequences retrieved from public repositories for  $\beta$ -ketosynthase**

| <b>Species</b>                   | <b>Database</b> | <b>Accession number</b> |
|----------------------------------|-----------------|-------------------------|
| <i>Alexandrium ostenfeldii</i>   | UniProtKB       | K7WCI2                  |
| <i>Anolis carolinensis</i>       | EggNOG 4.5.1    | ENSACAP00000009733      |
| <i>Aspergillus clavatus</i>      | EggNOG 4.5.1    | CADACLAP000000068       |
| <i>Aspergillus terreus</i>       | EggNOG 4.5.1    | CADATEAP000000507       |
| <i>Azadinium spinosum</i>        | UniProtKB       | A0A0A0V936              |
| <i>Caenorhabditis brenneri</i>   | EggNOG 4.5.1    | CBN05956                |
| <i>Chlamydomonas reinhardtii</i> | EggNOG 4.5.1    | EDP07994                |
| <i>Ciona savignyi</i>            | EggNOG 4.5.1    | ENSCSAVP00000011720     |
| <i>Cryptosporidium muris</i>     | EggNOG 4.5.1    | XP_002140396.1          |
| <i>Danaus plexippus</i>          | EggNOG 4.5.1    | EHJ69181                |
| <i>Danio rerio</i>               | EggNOG 4.5.1    | ENSDARP00000098122      |
| <i>Dictyostelium purpureum</i>   | EggNOG 4.5.1    | XP_003282946.1          |
| <i>Dipodomys ordii</i>           | EggNOG 4.5.1    | ENSDORP00000004029      |
| <i>Fusarium oxysporum</i>        | EggNOG 4.5.1    | FOXG_02741P0            |
| <i>Gasterosteus aculeatus</i>    | EggNOG 4.5.1    | ENSGACP00000002882      |
| <i>Gorilla gorilla</i>           | EggNOG 4.5.1    | ENSGGOP00000011384      |
| <i>Heliconius melpomene</i>      | EggNOG 4.5.1    | HMEL004144-PA           |
| <i>Heterocapsa triquetra</i>     | UniProtKB       | K7W9M8                  |
| <i>Homo sapiens</i>              | EggNOG 4.5.1    | ENSP00000304592         |
| <i>Karenia brevis</i>            | UniProtKB       | A7KH55                  |
| <i>Karenia brevis</i>            | UniProtKB       | A7KH58                  |
| <i>Karenia mikimotoi</i>         | UniProtKB       | A0A0P0YL85              |
| <i>Magnaporthe oryzae</i>        | EggNOG 4.5.1    | MGG_00233T0             |
| <i>Magnaporthe poae</i>          | EggNOG 4.5.1    | MAPG_01087T0            |
| <i>Mus musculus</i>              | EggNOG 4.5.1    | ENSMUSP00000052872      |
| <i>Necteria haematococca</i>     | EggNOG 4.5.1    | NechaP106233            |
| <i>Ostreococcus lucimarinus</i>  | EggNOG 4.5.1    | A4RSV8                  |
| <i>Rattus norvegicus</i>         | EggNOG 4.5.1    | ENSRNOP00000064445      |
| <i>Sus scrofa</i>                | EggNOG 4.5.1    | ENSSSCP00000021647      |
| <i>Trichoplax adhaerens</i>      | EggNOG 4.5.1    | TriadP31339             |
| <i>Vitrella brassicaformis</i>   | UniProtKB       | A0A0G4GSR5              |



**Supplementary Table S2. List of the sequences retrieved from public repositories for L-asparaginase**

| <b>Species</b>                    | <b>Database</b> | <b>Accession number</b> |
|-----------------------------------|-----------------|-------------------------|
| <i>Amphimedon queenslandica</i>   | EggNOG 4.5.1    | PAC_15705820            |
| <i>Anolis carolinensis</i>        | EggNOG 4.5.1    | ENSACAP00000010777      |
| <i>Aspergillus terreus</i>        | EggNOG 4.5.1    | CADATEAP00002702        |
| <i>Branchiostoma floridae</i>     | EggNOG 4.5.1    | JGI278040               |
| <i>Caenorhabditis brenneri</i>    | EggNOG 4.5.1    | CBN28810                |
| <i>Chlamydomonas reinhardtii</i>  | EggNOG 4.5.1    | EDP09027                |
| <i>Chrysochromulina sp.</i>       | UniProtKB       | AOA0MOLS84              |
| <i>Coccidioides posadasii</i>     | EggNOG 4.5.1    | XP_003069781.1          |
| <i>Danaus plexippus</i>           | EggNOG 4.5.1    | EHJ67811                |
| <i>Danio rerio</i>                | EggNOG 4.5.1    | ENSDARP00000103166      |
| <i>Daphnia pulex</i>              | EggNOG 4.5.1    | DappuP300337            |
| <i>Dictyostelium discoideum</i>   | EggNOG 4.5.1    | DDB0201640              |
| <i>Dictyostelium fasciculatum</i> | UniProtKB       | F4PK88                  |
| <i>Dictyostelium lacteum</i>      | UniProtKB       | AOA151Z2Z6              |
| <i>Dictyostelium purpureum</i>    | UniProtKB       | F0ZKN3                  |
| <i>Dictyostelium purpureum</i>    | EggNOG 4.5.1    | XP_003287968.1          |
| <i>Drosophila melanogaster</i>    | EggNOG 4.5.1    | FBpp0081620             |
| <i>Emericella nidulans</i>        | EggNOG 4.5.1    | CADANIAP00002415        |
| <i>Erwinia amylovora</i>          | UniProtKB       | D4I3Y5                  |
| <i>Erwinia amylovora</i>          | UniProtKB       | E5B626                  |
| <i>Escherichia coli</i>           | UniProtKB       | P0A962                  |
| <i>Escherichia coli</i>           | UniProtKB       | P0A963                  |
| <i>Fragilariopsis cylindrus</i>   | UniProtKB       | AOA1E7F9C6              |
| <i>Gallus gallus</i>              | EggNOG 4.5.1    | ENSGALP00000018854      |
| <i>Gasterosteus aculeatus</i>     | EggNOG 4.5.1    | ENSGACP00000010569      |
| <i>Gorilla gorilla</i>            | EggNOG 4.5.1    | ENSGGOP00000003182      |
| <i>Heliconius melpomene</i>       | EggNOG 4.5.1    | HMEL010500-PA           |
| <i>Homo sapiens</i>               | UniProtKB       | Q86U10                  |
| <i>Homo sapiens</i>               | EggNOG 4.5.1    | ENSP00000450040         |
| <i>Kangiella koreensis</i>        | UniProtKB       | C7RBC6                  |
| <i>Magnaporthe poae</i>           | EggNOG 4.5.1    | MAPG_02287T0            |
| <i>Meleagris gallopavo</i>        | EggNOG 4.5.1    | ENSMGAP00000014197      |
| <i>Monosiga brevicollis</i>       | EggNOG 4.5.1    | XP_001747607.1          |
| <i>Mus musculus</i>               | UniProtKB       | A0JNU3                  |
| <i>Mus musculus</i>               | EggNOG 4.5.1    | ENSMUSP00000078369      |
| <i>Nannochloropsis gaditana</i>   | UniProtKB       | W7U8P8                  |
| <i>Necteria haematococca</i>      | EggNOG 4.5.1    | NechaP55158             |
| <i>Nematostella vectensis</i>     | EggNOG 4.5.1    | NEMVEDRAFT_v1g10699-PA  |
| <i>Oryza sativa</i>               | EggNOG 4.5.1    | BGOSGA039015-PA         |
| <i>Ostreococcus lucimarinus</i>   | EggNOG 4.5.1    | A4S6P8                  |
| <i>Ostreococcus tauri</i>         | EggNOG 4.5.1    | Q00WU7                  |
| <i>Pan troglodytes</i>            | EggNOG 4.5.1    | ENSPTRP00000011549      |
| <i>Pelodiscus sinensis</i>        | EggNOG 4.5.1    | ENSPSIP00000014276      |

|                                      |              |                    |
|--------------------------------------|--------------|--------------------|
| <i>Perkinsus marinus</i>             | UniProtKB    | C5LA22             |
| <i>Perkinsus marinus</i>             | EggNOG 4.5.1 | XP_002765048.1     |
| <i>Phaeodactylum tricornutum</i>     | UniProtKB    | B7G1S2             |
| <i>Phaeodactylum tricornutum</i>     | EggNOG 4.5.1 | Phatr20905         |
| <i>Pristionchus pacificus</i>        | EggNOG 4.5.1 | PPA26441           |
| <i>Rattus norvegicus</i>             | UniProtKB    | O88202             |
| <i>Rattus norvegicus</i>             | EggNOG 4.5.1 | ENSRNOP00000017454 |
| <i>Saccharomyces cerevisiae</i>      | EggNOG 4.5.1 | YDR321W            |
| <i>Serratia odorifera</i>            | UniProtKB    | D4E5P7             |
| <i>Strongylocentrotus purpuratus</i> | EggNOG 4.5.1 | SPU_007448tr       |
| <i>Thalassiosira pseudonana</i>      | UniProtKB    | B5YNE5             |
| <i>Thalassiosira pseudonana</i>      | EggNOG 4.5.1 | Thaps7120          |
| <i>Trichoplax adhaerens</i>          | EggNOG 4.5.1 | TriadP30040        |

**Supplementary Table S3. List of the sequences retrieved from public repositories for cellulase**

| <b>Species</b>                    | <b>Database</b> | <b>Accession number</b> |
|-----------------------------------|-----------------|-------------------------|
| <i>Amphimedon queenslandica</i>   | EggNOG 4.5.1    | PAC_15719652            |
| <i>Amphimedon queenslandica</i>   | UniProtKB       | I1FU52                  |
| <i>Aspergillus calidoustus</i>    | UniProtKB       | A0A0U5G5A8              |
| <i>Aspergillus clavatus</i>       | UniProtKB       | A1CE97                  |
| <i>Aspergillus oryzae</i>         | UniProtKB       | Q2UBM3                  |
| <i>Aspergillus terreus</i>        | EggNOG 4.5.1    | CADATEAP00005220        |
| <i>Aspergillus terreus</i>        | UniProtKB       | Q5G1M0                  |
| <i>Daphnia pulex</i>              | EggNOG 4.5.1    | DappuP300366            |
| <i>Dictyostelium discoideum</i>   | EggNOG 4.5.1    | DDB0302429              |
| <i>Dictyostelium purpureum</i>    | EggNOG 4.5.1    | XP_003287745.1          |
| <i>Lingulodinium polyedrum</i>    | UniProtKB       | D8UXL7                  |
| <i>Magnaporthe oryzae</i>         | EggNOG 4.5.1    | MGG_06834T0             |
| <i>Magnaporthe oryzae</i>         | UniProtKB       | G4NK46                  |
| <i>Magnaporthe poae</i>           | EggNOG 4.5.1    | MAPG_04437T0            |
| <i>Necteria haematococca</i>      | EggNOG 4.5.1    | NechaP52498             |
| <i>Neosartorya fischeri</i>       | UniProtKB       | A1DMA5                  |
| <i>Neosartorya fumigata</i>       | UniProtKB       | B0Y793                  |
| <i>Neosartorya fumigata</i>       | UniProtKB       | B0Y8K2                  |
| <i>Neurospora crassa</i>          | UniProtKB       | Q7SA23                  |
| <i>Penicillium italicum</i>       | UniProtKB       | A0A0A2L6R7              |
| <i>Pleurotus eryngii</i>          | UniProtKB       | A0A0D6A8W8              |
| <i>Pleurotus ostreatus</i>        | UniProtKB       | A0A067NLE5              |
| <i>Pyrenophora teres f. teres</i> | EggNOG 4.5.1    | XP_003301114.1          |
| <i>Pyronema omphalodes</i>        | UniProtKB       | U4L139                  |
| <i>Rhizoctonia solani</i>         | UniProtKB       | A0A0K6GD52              |
| <i>Rhizoctonia solani</i>         | UniProtKB       | A0A0A1UL53              |
| <i>Thalassiosira oceanica</i>     | UniProtKB       | K0T5R6                  |
| <i>Trichoderma koningii</i>       | UniProtKB       | P62695                  |

**Supplementary Table S4. List of selected reference genes (RG) and genes of interest (GOI) with their abbreviations (Abbr), functions, primer's sequences and efficiencies.**

| Gene                                                          | Abbr   | Function                                               | Primer F             | Primer R             | E    |
|---------------------------------------------------------------|--------|--------------------------------------------------------|----------------------|----------------------|------|
| <i>Reference genes (RG)</i>                                   |        |                                                        |                      |                      |      |
| Alpha tubulin                                                 | ATUB   | Microtubule subunit                                    | AACTCATCACCGTAGCCCTC | ATGTACTCCAAGCGTGCCTT | 1.99 |
| Beta tubulin                                                  | BTUB   | Microtubule subunit                                    | TTCCTCATCGAACGCACCTT | CAATGATGATGCGCCACTCC | 2    |
| Ubiquitin                                                     | UB     | Post-translational modification                        | GGAATTCCTCTTTGTCTGGA | GCTCAAGGTCGGTAGGGTC  | 2    |
| Cyclin-dependent kinase 3                                     | CDK3   | Cell cycle regulation                                  | TCCCAATGACCACACATCGA | ATTGAAGCTGGCGGACTTTG | 2    |
| Glyceraldehyde 3-phosphate dehydrogenase                      | GAPDH  | Glycolysis                                             | GGAGAAGGGGCAAGAGACAA | GTGCCTTCCAGTGCTCAATG | 1.97 |
| <i>Genes of interest (GOI)</i>                                |        |                                                        |                      |                      |      |
| Heat shock protein 70                                         | HSP70  | Stress response                                        | ATGCGATCGATCTCTGCCTG | CGCGCAATGACAAAGGACAA | 2    |
| Heat shock protein 90                                         | HSP90  | Stress response                                        | GATCTCGAGCCCTCCTTGG  | GCCCAGGTGTCATCTTCTCC | 2    |
| Nitrate transporter                                           | NATETR | Transporter                                            | GGTAGCACCCACTGTTCCAA | TTGACAGATGGAGGTGTGGC | 2    |
| Nitrate reductase                                             | NATE   | Reduces nitrate in nitrite                             | CTCCGAGGCTTGTGTGGAT  | AAGATCGACGGCCAAGTTGT | 2    |
| Nitrite reductase                                             | NITE   | Reduces nitrite in different products                  | CCAAGCCAGCATCAACCAAC | TGGCCAACATCCAGAAGACC | 1.99 |
| Histidine ammonia-lyase, histidase                            | HAL    | Histidine catabolism<br>Valine, leucine and isoleucine | ACCTAGTCTGCCACCAAGAC | TCCCAACTCCCAAGGTCATC | 2    |
| 3-hydroxyacyl-CoA dehydrogenase                               | HADH   | degradation                                            | AACGGGGTTGCTATCCATCA | AGGGAAACATGATGCTTGCG | 2    |
| Malate dehydrogenase                                          | MDH    | Citrate cycle (TCA cycle)                              | GCTGTGCTCGTTCTGTGAAA | ATGCAGTTGTGGCGTTGATT | 2    |
| Polypeptide n-acetylgalactosaminyltransferase 1               | GALNT1 | Oligosaccharide biosynthesis                           | ATGTCCAAGAGACGAAGCA  | GCGCTAAGAATACTGGTGGC | 2    |
| Phosphoglycerate kinase                                       | PGK    | Glycolysis / Gluconeogenesis                           | CTGATCGCCAACATCGCTAC | ATCGGTGGTGGTGATTGAGT | 2    |
| Phospholipase D1                                              | PLD1   | Glycerophospholipid metabolism                         | TTTCTGTTGGGCTGTGCTTC | TCCAACAAAGAATGCCAGC  | 2    |
| Light-independent protochlorophyllide reductase               | LIPOR  | Chlorophyll biosynthetic process                       | TCCAAGAGACCGCAAGCTTA | TGAGTTGCGCACAGAAGTTT | 2    |
| Permease                                                      | PER    | Membrane transport protein                             | CTTGAAGACGAATCGCCTGG | TTTGAGGGCTTGGTCTTTGC | 2    |
| $\beta$ -ketosynthase (Type I PKS $\beta$ -ketoacyl synthase) | KS     | Polyketide synthesis                                   | GGTATCGCTTGCCAGGATCA | AGGTTGAATGTCTGCTGGCA | 2    |



**Supplementary Table S6: Statistics of assemblies produced by trinity and oases assemblers**

| Replicates used       | all       | all      | 1         | 2         | 3         | 1         | 2         | 3         |                          |
|-----------------------|-----------|----------|-----------|-----------|-----------|-----------|-----------|-----------|--------------------------|
| Condition             | control   | expN     | control   | control   | control   | expN      | expN      | expN      |                          |
| Assembler             | trinity   | trinity  | oases     | oases     | oases     | oases     | oases     | oases     | trinity + oases + cd-hit |
| Number of contigs     | 87026     | 84730    | 130807    | 117719    | 112146    | 127759    | 131460    | 91474     | 112530                   |
| Total assembly length | 101129093 | 99099585 | 168493401 | 154063973 | 147864097 | 162921637 | 169418069 | 120536365 | 160504075                |
| Min length (bp)       | 201       | 201      | 200       | 200       | 200       | 200       | 200       | 200       | 121                      |
| Mean length (bp)      | 1162      | 1169     | 1288      | 1308      | 1318      | 1275      | 1288      | 1317      | 1426                     |
| Max length (bp)       | 21702     | 21725    | 21769     | 17175     | 18612     | 19077     | 21257     | 15252     | 21769                    |
| N50                   | 1813      | 1805     | 1883      | 1894      | 1896      | 1885      | 1872      | 1865      | 1979                     |
| N90                   | 530       | 547      | 632       | 649       | 666       | 616       | 633       | 677       | 750                      |

**Supplementary Table S7. List of KEGG pathways associated to contigs with assigned enzyme codes in the full transcriptome.** The table contains pathway names, pathway ID, number of enzymes found for each pathway, enzyme codes and sequence names.

| Pathway                     | Pathway ID | #Enzs in Pathway | Enzyme                                                                                                                                                                                                                                                                                                                                                                                                                                                                                                                                                                                                                                                                                                                                                                                                                                                                                                                                                                                                                                                                                                                                                                                                                                    | Seqs per Enzyme                                                                                                                                                                                                                                                                                                                                                                                                                                          | Seqs ID                                                                                                                                                                                                                                                                                                                                                                                                                                                                                                                                                                                                                                                                                                                                                                                                                                                                                                                                                                                                                                                                                                                                                                                                                                                                                                                                                                                                                                                                                                                                                                                                                                                                                                                                                                                                                                                                                                                                                                                                                                                                                                                                                                                                                                                                                                                                                                                                                                                                                                                                                                                                                                                                                                                                                                                                                                                                                                                                                                                                                                                                                                                                                                                                                                                                                                                                                                                                                                                                                                                                                                                                                                                                                                                                                                                                                                                                                                                                                                                                                                                                                                                                                                                                                                                                                                                                                                                                                                                                                                                                                                                                                                                                                                                                                                                                                                                                                                                                                                                                                                                                                                                                                                                                                                                                                                                                                                                                                                                                                                                                                                                                                                                                                                                                                                                                                                                                                                                                                                                                                       |
|-----------------------------|------------|------------------|-------------------------------------------------------------------------------------------------------------------------------------------------------------------------------------------------------------------------------------------------------------------------------------------------------------------------------------------------------------------------------------------------------------------------------------------------------------------------------------------------------------------------------------------------------------------------------------------------------------------------------------------------------------------------------------------------------------------------------------------------------------------------------------------------------------------------------------------------------------------------------------------------------------------------------------------------------------------------------------------------------------------------------------------------------------------------------------------------------------------------------------------------------------------------------------------------------------------------------------------|----------------------------------------------------------------------------------------------------------------------------------------------------------------------------------------------------------------------------------------------------------------------------------------------------------------------------------------------------------------------------------------------------------------------------------------------------------|-------------------------------------------------------------------------------------------------------------------------------------------------------------------------------------------------------------------------------------------------------------------------------------------------------------------------------------------------------------------------------------------------------------------------------------------------------------------------------------------------------------------------------------------------------------------------------------------------------------------------------------------------------------------------------------------------------------------------------------------------------------------------------------------------------------------------------------------------------------------------------------------------------------------------------------------------------------------------------------------------------------------------------------------------------------------------------------------------------------------------------------------------------------------------------------------------------------------------------------------------------------------------------------------------------------------------------------------------------------------------------------------------------------------------------------------------------------------------------------------------------------------------------------------------------------------------------------------------------------------------------------------------------------------------------------------------------------------------------------------------------------------------------------------------------------------------------------------------------------------------------------------------------------------------------------------------------------------------------------------------------------------------------------------------------------------------------------------------------------------------------------------------------------------------------------------------------------------------------------------------------------------------------------------------------------------------------------------------------------------------------------------------------------------------------------------------------------------------------------------------------------------------------------------------------------------------------------------------------------------------------------------------------------------------------------------------------------------------------------------------------------------------------------------------------------------------------------------------------------------------------------------------------------------------------------------------------------------------------------------------------------------------------------------------------------------------------------------------------------------------------------------------------------------------------------------------------------------------------------------------------------------------------------------------------------------------------------------------------------------------------------------------------------------------------------------------------------------------------------------------------------------------------------------------------------------------------------------------------------------------------------------------------------------------------------------------------------------------------------------------------------------------------------------------------------------------------------------------------------------------------------------------------------------------------------------------------------------------------------------------------------------------------------------------------------------------------------------------------------------------------------------------------------------------------------------------------------------------------------------------------------------------------------------------------------------------------------------------------------------------------------------------------------------------------------------------------------------------------------------------------------------------------------------------------------------------------------------------------------------------------------------------------------------------------------------------------------------------------------------------------------------------------------------------------------------------------------------------------------------------------------------------------------------------------------------------------------------------------------------------------------------------------------------------------------------------------------------------------------------------------------------------------------------------------------------------------------------------------------------------------------------------------------------------------------------------------------------------------------------------------------------------------------------------------------------------------------------------------------------------------------------------------------------------------------------------------------------------------------------------------------------------------------------------------------------------------------------------------------------------------------------------------------------------------------------------------------------------------------------------------------------------------------------------------------------------------------------------------------------------------------------------------|
| Biosynthesis of antibiotics | map01130   | 135              | ec:2.6.1.11 - transaminase, ec:6.3.3.1 - cyclo-ligase, ec:6.4.1.2 - carboxylase, ec:2.6.1.16 - transaminase (isomerizing), ec:2.7.1.90 - 1-phosphotransferase, ec:2.7.4.6 - kinase, ec:2.7.4.3 - kinase, ec:4.1.1.48 - synthase, ec:2.7.4.2 - kinase, ec:4.1.1.49 - carboxykinase (ATP), ec:4.1.1.39 - carboxylase, ec:1.3.5.1 - dehydrogenase, ec:1.4.3.3 - oxidase, ec:4.1.1.32 - carboxykinase (GTP), ec:4.1.1.20 - decarboxylase, ec:1.17.7.1 - synthase (ferredoxin), ec:2.6.1.52 - transaminase, ec:2.2.1.1 - glycolaldehydetransferase, ec:2.2.1.6 - synthase, ec:2.2.1.7 - synthase, ec:2.7.2.4 - kinase, ec:2.7.2.3 - kinase, ec:4.3.2.1 - lyase, ec:4.3.2.2 - lyase, ec:1.2.1.38 - reductase, ec:2.7.1.40 - kinase, ec:3.5.4.6 - deaminase, ec:2.6.1.42 - transaminase, ec:1.2.1.59 - dehydrogenase (NAD(P) <sup>+</sup> (phosphorylating)), ec:2.7.1.11 - phosphohexokinase, ec:4.2.1.51 - dehydratase, ec:2.5.1.10 - diphosphate synthase, ec:6.2.1.5 - ligase (ADP-forming), ec:2.5.1.19 - 1-carboxyvinyltransferase, ec:6.2.1.4 - ligase (GDP-forming), ec:6.2.1.1 - ligase, ec:2.5.1.21 - synthase, ec:2.5.1.29 - diphosphate synthase, ec:1.1.1.133 - reductase, ec:1.2.1.11 - dehydrogenase, ec:1.2.1.12 - dehydrogenase | 4, 4, 16, 1, 1, 20, 10, 1, 1, 5, 95, 11, 1, 5, 2, 2, 4, 24, 1, 1, 7, 41, 1, 1, 4, 25, 3, 6, 16, 5, 1, 1, 28, 1, 6, 1, 1, 1, 2, 4, 45, 1, 1, 1, 4, 3, 2, 4, 1, 9, 2, 2, 2, 2, 1, 2, 10, 1, 4, 1, 2, 2, 1, 1, 5, 2, 2, 1, 7, 3, 1, 4, 1, 31, 1, 1, 11, 6, 6, 1, 4, 8, 1, 9, 3, 38, 1, 2, 8, 2, 1, 1, 5, 2, 5, 3, 4, 8, 7, 5, 10, 4, 4, 2, 5, 1, 2, 1, 1, 2, 8, 2, 5, 23, 2, 2, 5, 23, 2, 1, 1, 7, 15, 10, 11, 2, 1, 24, 16, 10, 10, 6, 7, 1, 2, 1, 8, 1, 1 | vo_c3_Locus_29526_Transcript_7/10_Confidence_0.268_Length_874, vo_n2_Locus_6432_Transcript_1/2_Confidence_0.667_Length_1653, vo_n2_Locus_3256_Transcript_3/4_Confidence_0.250_Length_4070, vo_c1_Locus_5351_Transcript_2/2_Confidence_0.333_Length_1693, vo_c2_Locus_14099_Transcript_8/21_Confidence_0.413_Length_6648, vo_c1_Locus_1785_Transcript_2/4_Confidence_0.667_Length_6496, vo_c2_Locus_14099_Transcript_2/21_Confidence_0.444_Length_6577, vo_c3_Locus_4727_Transcript_17/25_Confidence_0.456_Length_6641, vo_n3_Locus_484_Transcript_6/12_Confidence_0.250_Length_1533, vo_c3_Locus_17332_Transcript_1/1_Confidence_0.333_Length_6493, vo_n3_Locus_696_Transcript_20/35_Confidence_0.473_Length_5396, vo_c3_Locus_2164_Transcript_38/39_Confidence_0.292_Length_6879, tri_n_comp41552_c0_seq1, vo_c2_Locus_1509_Transcript_1/47_Confidence_0.149_Length_2731, vo_c2_Locus_2193_Transcript_1/3_Confidence_0.667_Length_1218, vo_c1_Locus_860_Transcript_10/29_Confidence_0.571_Length_6744, vo_c2_Locus_1509_Transcript_11/47_Confidence_0.164_Length_2686, vo_n2_Locus_1751_Transcript_51/59_Confidence_0.207_Length_3566, vo_n2_Locus_15097_Transcript_1/1_Confidence_0.000_Length_3935, vo_n3_Locus_484_Transcript_5/12_Confidence_0.250_Length_1451, vo_c1_Locus_860_Transcript_11/29_Confidence_0.571_Length_6741, tri_c_comp19913_c0_seq3, vo_n2_Locus_1751_Transcript_37/59_Confidence_0.195_Length_3437, vo_c2_Locus_1509_Transcript_6/47_Confidence_0.149_Length_2592, vo_n2_Locus_1408_Transcript_4/5_Confidence_0.222_Length_11768, vo_c2_Locus_6348_Transcript_1/2_Confidence_1.000_Length_3755, vo_c1_Locus_13409_Transcript_2/6_Confidence_0.286_Length_871, vo_c3_Locus_2169_Transcript_1/3_Confidence_0.167_Length_848, vo_n2_Locus_739_Transcript_8/8_Confidence_0.167_Length_1338, vo_n3_Locus_4095_Transcript_2/3_Confidence_0.444_Length_3401, vo_c1_Locus_12423_Transcript_2/2_Confidence_0.333_Length_980, vo_c1_Locus_25242_Transcript_1/1_Confidence_0.000_Length_1465, vo_c1_Locus_4920_Transcript_1/2_Confidence_0.714_Length_1520, tri_c_comp49412_c0_seq1, vo_n2_Locus_5279_Transcript_1/1_Confidence_0.333_Length_2493, vo_n2_Locus_20723_Transcript_1/1_Confidence_0.000_Length_1179, vo_n3_Locus_24634_Transcript_1/1_Confidence_0.000_Length_445, vo_n1_Locus_5513_Transcript_4/4_Confidence_0.286_Length_1053, tri_c_comp24673_c0_seq1, tri_c_comp5012_c0_seq2, vo_c3_Locus_3080_Transcript_1/28_Confidence_0.009_Length_1584, vo_n1_Locus_9563_Transcript_1/1_Confidence_0.000_Length_1437, vo_n2_Locus_26604_Transcript_1/2_Confidence_0.750_Length_1361, vo_n2_Locus_2689_Transcript_2/2_Confidence_0.000_Length_2612, vo_c2_Locus_4541_Transcript_2/6_Confidence_0.571_Length_909, vo_n2_Locus_26604_Transcript_2/2_Confidence_0.000_Length_1685, vo_c2_Locus_10361_Transcript_6/7_Confidence_0.250_Length_1220, tri_c_comp24673_c0_seq1, vo_n1_Locus_2451_Transcript_1/3_Confidence_0.600_Length_2348, vo_c3_Locus_4102_Transcript_1/1_Confidence_0.000_Length_1034, vo_n2_Locus_22654_Transcript_1/1_Confidence_0.000_Length_691, vo_n1_Locus_2897_Transcript_2/14_Confidence_0.160_Length_971, vo_n2_Locus_14542_Transcript_1/3_Confidence_0.200_Length_924, vo_n3_Locus_12191_Transcript_1/1_Confidence_0.000_Length_1671, vo_n2_Locus_5279_Transcript_1/1_Confidence_0.333_Length_2493, vo_n3_Locus_24634_Transcript_1/1_Confidence_0.000_Length_445, vo_c3_Locus_25814_Transcript_1/1_Confidence_0.000_Length_1912, vo_n2_Locus_13158_Transcript_1/2_Confidence_1.000_Length_1003, vo_c1_Locus_2295_Transcript_9/10_Confidence_0.238_Length_2213, vo_c2_Locus_2862_Transcript_9/10_Confidence_0.250_Length_2209, vo_c1_Locus_2295_Transcript_3/10_Confidence_0.524_Length_2330, vo_n2_Locus_1690_Transcript_8/11_Confidence_0.429_Length_2234, vo_n2_Locus_1690_Transcript_9/11_Confidence_0.429_Length_2277, vo_c1_Locus_1636_Transcript_17/122_Confidence_0.157_Length_2013, vo_n3_Locus_37_Transcript_16/46_Confidence_0.281_Length_1685, vo_n2_Locus_3_Transcript_22527/24291_Confidence_0.000_Length_1609, vo_n3_Locus_37_Transcript_10/46_Confidence_0.207_Length_1727, vo_n3_Locus_37_Transcript_9/46_Confidence_0.215_Length_1812, vo_c1_Locus_1636_Transcript_122/122_Confidence_0.108_Length_2335, vo_n2_Locus_3_Transcript_22541/24291_Confidence_0.000_Length_288, vo_n2_Locus_3_Transcript_22550/24291_Confidence_0.000_Length_1791, vo_n3_Locus_37_Transcript_33/46_Confidence_0.163_Length_732, vo_n2_Locus_3_Transcript_22526/24291_Confidence_0.000_Length_620, vo_n2_Locus_3_Transcript_22511/24291_Confidence_0.000_Length_798, vo_c1_Locus_1636_Transcript_15/122_Confidence_0.065_Length_512, vo_c2_Locus_52_Transcript_144/466_Confidence_0.025_Length_2131, tri_n_comp20144_c0_seq14, vo_c2_Locus_52_Transcript_133/466_Confidence_0.023_Length_2364, tri_n_comp20144_c0_seq13, vo_n3_Locus_41731_Transcript_1/1_Confidence_0.500_Length_459, vo_c2_Locus_52_Transcript_132/466_Confidence_0.016_Length_1024, vo_n1_Locus_55_Transcript_52/66_Confidence_0.069_Length_313, tri_c_comp20343_c0_seq9, tri_n_comp20144_c0_seq10, tri_n_comp20144_c0_seq7, tri_n_comp20144_c0_seq6, vo_c3_Locus_31_Transcript_6/79_Confidence_0.152_Length_709, tri_n_comp20144_c0_seq3, tri_n_comp20144_c0_seq4, tri_n_comp20144_c0_seq1, vo_c1_Locus_1636_Transcript_86/122_Confidence_0.182_Length_2244, vo_c1_Locus_1636_Transcript_73/122_Confidence_0.222_Length_1747, vo_c2_Locus_52_Transcript_164/466_Confidence_0.011_Length_2810, vo_n2_Locus_3_Transcript_22535/24291_Confidence_0.000_Length_656, vo_n2_Locus_3_Transcript_22546/24291_Confidence_0.000_Length_1498, vo_c3_Locus_31_Transcript_74/79_Confidence_0.124_Length_2769, vo_c3_Locus_31_Transcript_68/79_Confidence_0.124_Length_1224, vo_n3_Locus_37_Transcript_21/46_Confidence_0.148_Length_1139, vo_c3_Locus_31_Transcript_67/79_Confidence_0.152_Length_2229, vo_n3_Locus_37_Transcript_14/46_Confidence_0.259_Length_5942, vo_n1_Locus_55_Transcript_3/66_Confidence_0.063_Length_450, |

|  |  |                                                                                                                                                                                                                                                                                                                                                                                                                                                                                                                                                                                                                                                                                                                                                                                                                                                                                                                                                                                                                                                                                                                                                                                                                                                                                                                                                                                                                                                                                                                                                                                                                                                                                         |                                                                                                                                                                                                                                                                                                                                                                                                                                                                                                                                                                                                                                                                                                                                                                                                                                                                                                                                                                                                                                                                                                                                                                                                                                                                                                                                                                                                                                                                                                                                                                                                                                                                                                                                                                                                                                                                                                                                                                                                                                                                                                                                                                                                                                                                                                                                                                                                                                                                                                                                                                                                                                                                                                                                                                                                                                                                                                                                                                                                                                                                                                                                                                                                                                                                                                                                                                                                                                                                                                                                                                                                                                                                                                                                                                                                                                                                                                                                                                                                                                                                                                                                                                                                                                                                                                                                                                                                                                                                                                                                                                                                                                                                                                                                                                                                                                                                                                                                                                                                                                                                                                                                                                                                                                                                                                                                                                                                                                                                                                                                                                                                                                                                                                                                                                                                                                                                                                                                                                                                                                                                                                                                                                                                                                                                                                                                                                                                                                                                                                                                                                                                                                                                                                                                                                                                                                                                                                                                                                                                                                                                                                                                                                                                                                                                                                                                                   |
|--|--|-----------------------------------------------------------------------------------------------------------------------------------------------------------------------------------------------------------------------------------------------------------------------------------------------------------------------------------------------------------------------------------------------------------------------------------------------------------------------------------------------------------------------------------------------------------------------------------------------------------------------------------------------------------------------------------------------------------------------------------------------------------------------------------------------------------------------------------------------------------------------------------------------------------------------------------------------------------------------------------------------------------------------------------------------------------------------------------------------------------------------------------------------------------------------------------------------------------------------------------------------------------------------------------------------------------------------------------------------------------------------------------------------------------------------------------------------------------------------------------------------------------------------------------------------------------------------------------------------------------------------------------------------------------------------------------------|---------------------------------------------------------------------------------------------------------------------------------------------------------------------------------------------------------------------------------------------------------------------------------------------------------------------------------------------------------------------------------------------------------------------------------------------------------------------------------------------------------------------------------------------------------------------------------------------------------------------------------------------------------------------------------------------------------------------------------------------------------------------------------------------------------------------------------------------------------------------------------------------------------------------------------------------------------------------------------------------------------------------------------------------------------------------------------------------------------------------------------------------------------------------------------------------------------------------------------------------------------------------------------------------------------------------------------------------------------------------------------------------------------------------------------------------------------------------------------------------------------------------------------------------------------------------------------------------------------------------------------------------------------------------------------------------------------------------------------------------------------------------------------------------------------------------------------------------------------------------------------------------------------------------------------------------------------------------------------------------------------------------------------------------------------------------------------------------------------------------------------------------------------------------------------------------------------------------------------------------------------------------------------------------------------------------------------------------------------------------------------------------------------------------------------------------------------------------------------------------------------------------------------------------------------------------------------------------------------------------------------------------------------------------------------------------------------------------------------------------------------------------------------------------------------------------------------------------------------------------------------------------------------------------------------------------------------------------------------------------------------------------------------------------------------------------------------------------------------------------------------------------------------------------------------------------------------------------------------------------------------------------------------------------------------------------------------------------------------------------------------------------------------------------------------------------------------------------------------------------------------------------------------------------------------------------------------------------------------------------------------------------------------------------------------------------------------------------------------------------------------------------------------------------------------------------------------------------------------------------------------------------------------------------------------------------------------------------------------------------------------------------------------------------------------------------------------------------------------------------------------------------------------------------------------------------------------------------------------------------------------------------------------------------------------------------------------------------------------------------------------------------------------------------------------------------------------------------------------------------------------------------------------------------------------------------------------------------------------------------------------------------------------------------------------------------------------------------------------------------------------------------------------------------------------------------------------------------------------------------------------------------------------------------------------------------------------------------------------------------------------------------------------------------------------------------------------------------------------------------------------------------------------------------------------------------------------------------------------------------------------------------------------------------------------------------------------------------------------------------------------------------------------------------------------------------------------------------------------------------------------------------------------------------------------------------------------------------------------------------------------------------------------------------------------------------------------------------------------------------------------------------------------------------------------------------------------------------------------------------------------------------------------------------------------------------------------------------------------------------------------------------------------------------------------------------------------------------------------------------------------------------------------------------------------------------------------------------------------------------------------------------------------------------------------------------------------------------------------------------------------------------------------------------------------------------------------------------------------------------------------------------------------------------------------------------------------------------------------------------------------------------------------------------------------------------------------------------------------------------------------------------------------------------------------------------------------------------------------------------------------------------------------------------------------------------------------------------------------------------------------------------------------------------------------------------------------------------------------------------------------------------------------------------------------------------------------------------------------------------------------------------------------------------------------------------------------------------------|
|  |  | <p>(phosphorylating),<br/> ec:4.1.1.17 - decarboxylase,<br/> ec:2.7.1.148 - 5'-<br/> diphospho)-2-C-methyl-D-<br/> erythritol kinase, ec:4.2.1.91<br/> - dehydratase, ec:2.7.6.1 -<br/> diphosphokinase,<br/> ec:1.17.1.8 - reductase,<br/> ec:1.8.1.4 - dehydrogenase,<br/> ec:2.5.1.1 - geranyl-<br/> diphosphate synthase,<br/> ec:4.6.1.12 - 2,4-<br/> cyclodiphosphate synthase,<br/> ec:5.3.1.1 - isomerase,<br/> ec:5.3.1.8 - isomerase,<br/> ec:5.3.1.6 - isomerase,<br/> ec:5.3.1.9 - isomerase,<br/> ec:2.1.1.41 - 24-C-<br/> methyltransferase,<br/> ec:2.7.7.60 - 4-phosphate<br/> cytidyltransferase,<br/> ec:3.1.3.3 - phosphatase,<br/> ec:1.1.1.2 - dehydrogenase<br/> (NADP+), ec:1.1.1.3 -<br/> dehydrogenase, ec:2.6.1.1 -<br/> transaminase, ec:5.3.3.2 -<br/> Delta-isomerase, ec:4.3.1.17<br/> - ammonia-lyase,<br/> ec:4.3.1.19 - ammonia-<br/> lyase, ec:1.3.1.13 -<br/> dehydrogenase (NADP+),<br/> ec:1.3.1.12 -<br/> dehydrogenase, ec:1.2.1.3 -<br/> dehydrogenase (NAD+),<br/> ec:3.5.1.14 - acid<br/> amidohydrolase, ec:2.3.1.9 -<br/> C-acetyltransferase,<br/> ec:2.3.1.1 - N-<br/> acetyltransferase, ec:4.4.1.1<br/> - gamma-lyase, ec:1.1.5.4 -<br/> dehydrogenase (quinone),<br/> ec:4.3.3.7 - synthase,<br/> ec:6.3.5.3 - synthase,<br/> ec:1.14.13.72 -<br/> monooxygenase, ec:2.3.3.8<br/> - citrate synthase, ec:1.5.1.2<br/> - reductase, ec:5.4.99.18 -<br/> ribonucleotide mutase,<br/> ec:2.3.3.1 - (S)-synthase,<br/> ec:1.5.1.8 - dehydrogenase<br/> (NADP+, L-lysine-forming),<br/> ec:1.5.1.9 - dehydrogenase<br/> (NAD+, L-glutamate-<br/> forming), ec:5.1.3.13 - 3,5-<br/> epimerase, ec:2.3.3.10 -<br/> synthase, ec:2.1.2.3 -</p> | <p>tri_c_comp20343_c0_seq4, tri_c_comp20343_c0_seq3, vo_n2_Locus_3_Transcript_22566/24291_Confidence_0.000_Length_2168,<br/> vo_n2_Locus_3452_Transcript_2/4_Confidence_0.636_Length_263, vo_n2_Locus_3_Transcript_22486/24291_Confidence_0.000_Length_1883,<br/> vo_c1_Locus_1636_Transcript_120/122_Confidence_0.135_Length_3625, vo_c2_Locus_52_Transcript_120/466_Confidence_0.009_Length_610,<br/> vo_c3_Locus_31_Transcript_13/79_Confidence_0.099_Length_748, vo_c1_Locus_1636_Transcript_69/122_Confidence_0.074_Length_844,<br/> vo_n2_Locus_3_Transcript_22520/24291_Confidence_0.000_Length_1452, vo_n2_Locus_3_Transcript_22533/24291_Confidence_0.000_Length_679,<br/> vo_n2_Locus_3_Transcript_22537/24291_Confidence_0.000_Length_840, vo_c3_Locus_31_Transcript_63/79_Confidence_0.148_Length_3613,<br/> vo_c1_Locus_1636_Transcript_71/122_Confidence_0.055_Length_846, vo_c3_Locus_31_Transcript_77/79_Confidence_0.297_Length_1736,<br/> vo_c1_Locus_1636_Transcript_83/122_Confidence_0.191_Length_2430, tri_n_comp20833_c0_seq3,<br/> vo_c3_Locus_31_Transcript_75/79_Confidence_0.212_Length_8463, vo_c2_Locus_52_Transcript_153/466_Confidence_0.026_Length_1551,<br/> vo_c3_Locus_31_Transcript_3/79_Confidence_0.035_Length_301, vo_n2_Locus_3_Transcript_22489/24291_Confidence_0.000_Length_274,<br/> vo_n2_Locus_3_Transcript_22509/24291_Confidence_0.000_Length_800, vo_n3_Locus_37_Transcript_38/46_Confidence_0.163_Length_922,<br/> tri_c_comp21288_c0_seq1, vo_c1_Locus_1636_Transcript_88/122_Confidence_0.074_Length_1384,<br/> vo_c1_Locus_1636_Transcript_121/122_Confidence_0.018_Length_960, vo_n3_Locus_37_Transcript_5/46_Confidence_0.289_Length_1505,<br/> vo_n1_Locus_55_Transcript_33/66_Confidence_0.040_Length_1095, vo_c3_Locus_31_Transcript_65/79_Confidence_0.166_Length_2369,<br/> vo_c3_Locus_31_Transcript_73/79_Confidence_0.208_Length_2557, vo_c3_Locus_31_Transcript_9/79_Confidence_0.152_Length_714,<br/> vo_c2_Locus_52_Transcript_113/466_Confidence_0.004_Length_590, vo_n2_Locus_3_Transcript_22492/24291_Confidence_0.000_Length_1595,<br/> vo_n1_Locus_55_Transcript_54/66_Confidence_0.183_Length_2185, vo_c3_Locus_33_Transcript_2/2_Confidence_0.714_Length_611,<br/> vo_c2_Locus_52_Transcript_125/466_Confidence_0.007_Length_559, vo_c2_Locus_52_Transcript_135/466_Confidence_0.025_Length_2711,<br/> vo_n1_Locus_55_Transcript_12/66_Confidence_0.331_Length_2232, vo_c1_Locus_1636_Transcript_100/122_Confidence_0.031_Length_685,<br/> vo_c2_Locus_52_Transcript_131/466_Confidence_0.023_Length_1964, vo_c3_Locus_31_Transcript_7/79_Confidence_0.184_Length_710,<br/> vo_n1_Locus_55_Transcript_39/66_Confidence_0.194_Length_1391, vo_n3_Locus_37_Transcript_28/46_Confidence_0.193_Length_1043,<br/> vo_n1_Locus_55_Transcript_41/66_Confidence_0.263_Length_1742, vo_n1_Locus_55_Transcript_38/66_Confidence_0.171_Length_1387,<br/> vo_n2_Locus_3_Transcript_22491/24291_Confidence_0.000_Length_1174, vo_n3_Locus_37_Transcript_30/46_Confidence_0.178_Length_1043,<br/> vo_n2_Locus_3_Transcript_22503/24291_Confidence_0.000_Length_721, vo_n2_Locus_3_Transcript_22540/24291_Confidence_0.000_Length_271,<br/> vo_c2_Locus_52_Transcript_128/466_Confidence_0.003_Length_564, vo_c2_Locus_52_Transcript_162/466_Confidence_0.019_Length_1668,<br/> vo_n2_Locus_3_Transcript_22534/24291_Confidence_0.000_Length_449, vo_c1_Locus_1636_Transcript_116/122_Confidence_0.129_Length_3526,<br/> vo_c3_Locus_31_Transcript_70/79_Confidence_0.208_Length_1586, vo_n1_Locus_55_Transcript_9/66_Confidence_0.349_Length_2172,<br/> vo_c1_Locus_8362_Transcript_4/9_Confidence_0.254_Length_482, vo_n1_Locus_55_Transcript_50/66_Confidence_0.166_Length_2379,<br/> vo_n2_Locus_5500_Transcript_5/5_Confidence_0.308_Length_1268, vo_n2_Locus_5500_Transcript_1/5_Confidence_0.308_Length_1100,<br/> tri_n_comp12494_c0_seq1, vo_n2_Locus_5500_Transcript_2/5_Confidence_0.538_Length_1312,<br/> vo_n2_Locus_2182_Transcript_14/15_Confidence_0.458_Length_3129, vo_c2_Locus_642_Transcript_3/10_Confidence_0.571_Length_2141,<br/> vo_n1_Locus_1508_Transcript_4/6_Confidence_0.429_Length_1979, vo_n1_Locus_2259_Transcript_6/13_Confidence_0.429_Length_1275,<br/> vo_n1_Locus_2259_Transcript_9/13_Confidence_0.429_Length_1314, vo_c1_Locus_1462_Transcript_1/46_Confidence_0.182_Length_2129,<br/> vo_c1_Locus_1462_Transcript_8/46_Confidence_0.530_Length_9104, vo_n2_Locus_26350_Transcript_7/9_Confidence_0.231_Length_1309,<br/> vo_c1_Locus_2295_Transcript_9/10_Confidence_0.238_Length_2213, vo_c2_Locus_2862_Transcript_9/10_Confidence_0.250_Length_2209,<br/> vo_c1_Locus_2295_Transcript_3/10_Confidence_0.524_Length_2330, vo_n2_Locus_1690_Transcript_8/11_Confidence_0.429_Length_2234,<br/> vo_n2_Locus_1690_Transcript_9/11_Confidence_0.429_Length_2277, tri_c_comp30246_c0_seq1,<br/> vo_n1_Locus_454_Transcript_6/7_Confidence_0.364_Length_3522, tri_n_comp20539_c0_seq1,<br/> vo_n2_Locus_2098_Transcript_8/8_Confidence_0.130_Length_2485, vo_n2_Locus_2440_Transcript_3/6_Confidence_0.182_Length_1751,<br/> tri_c_comp24934_c0_seq1, vo_c3_Locus_9067_Transcript_6/7_Confidence_0.125_Length_1757,<br/> vo_c2_Locus_1886_Transcript_3/5_Confidence_0.444_Length_2764, vo_c3_Locus_1314_Transcript_17/46_Confidence_0.365_Length_2530,<br/> vo_n3_Locus_387_Transcript_34/39_Confidence_0.386_Length_2514, vo_c2_Locus_924_Transcript_20/40_Confidence_0.452_Length_2520,<br/> vo_c2_Locus_924_Transcript_13/40_Confidence_0.310_Length_2559, vo_c3_Locus_1314_Transcript_33/46_Confidence_0.292_Length_2524,<br/> vo_c1_Locus_1204_Transcript_14/17_Confidence_0.394_Length_4476, vo_c2_Locus_924_Transcript_19/40_Confidence_0.333_Length_2562,<br/> vo_n1_Locus_327_Transcript_13/41_Confidence_0.275_Length_2480, vo_c3_Locus_1314_Transcript_6/46_Confidence_0.208_Length_1518,<br/> vo_n1_Locus_327_Transcript_40/41_Confidence_0.176_Length_2442, vo_c3_Locus_1314_Transcript_38/46_Confidence_0.302_Length_2522,<br/> vo_c2_Locus_924_Transcript_34/40_Confidence_0.369_Length_2618, vo_c3_Locus_1314_Transcript_14/46_Confidence_0.229_Length_3828,<br/> vo_c2_Locus_924_Transcript_16/40_Confidence_0.321_Length_2559, vo_c2_Locus_924_Transcript_23/40_Confidence_0.488_Length_2850,<br/> vo_c3_Locus_1314_Transcript_21/46_Confidence_0.365_Length_2524, vo_c1_Locus_1204_Transcript_13/17_Confidence_0.364_Length_4497,<br/> vo_n1_Locus_327_Transcript_24/41_Confidence_0.385_Length_2547, vo_c2_Locus_924_Transcript_17/40_Confidence_0.333_Length_2453,<br/> tri_c_comp20608_c0_seq4, tri_c_comp20608_c0_seq5, vo_c3_Locus_1314_Transcript_43/46_Confidence_0.198_Length_2519,<br/> vo_n2_Locus_2054_Transcript_26/37_Confidence_0.448_Length_2522, tri_c_comp20608_c0_seq7, tri_n_comp26150_c0_seq1,<br/> vo_c1_Locus_12331_Transcript_1/1_Confidence_0.000_Length_2548, vo_c1_Locus_1636_Transcript_120/122_Confidence_0.135_Length_3625,<br/> tri_n_comp29741_c0_seq1, vo_c3_Locus_31_Transcript_74/79_Confidence_0.124_Length_2769,<br/> vo_c2_Locus_10862_Transcript_1/1_Confidence_0.000_Length_1564, vo_c3_Locus_31_Transcript_63/79_Confidence_0.148_Length_3613,<br/> vo_c1_Locus_1636_Transcript_116/122_Confidence_0.129_Length_3526, vo_c2_Locus_52_Transcript_164/466_Confidence_0.011_Length_2810,</p> |
|--|--|-----------------------------------------------------------------------------------------------------------------------------------------------------------------------------------------------------------------------------------------------------------------------------------------------------------------------------------------------------------------------------------------------------------------------------------------------------------------------------------------------------------------------------------------------------------------------------------------------------------------------------------------------------------------------------------------------------------------------------------------------------------------------------------------------------------------------------------------------------------------------------------------------------------------------------------------------------------------------------------------------------------------------------------------------------------------------------------------------------------------------------------------------------------------------------------------------------------------------------------------------------------------------------------------------------------------------------------------------------------------------------------------------------------------------------------------------------------------------------------------------------------------------------------------------------------------------------------------------------------------------------------------------------------------------------------------|---------------------------------------------------------------------------------------------------------------------------------------------------------------------------------------------------------------------------------------------------------------------------------------------------------------------------------------------------------------------------------------------------------------------------------------------------------------------------------------------------------------------------------------------------------------------------------------------------------------------------------------------------------------------------------------------------------------------------------------------------------------------------------------------------------------------------------------------------------------------------------------------------------------------------------------------------------------------------------------------------------------------------------------------------------------------------------------------------------------------------------------------------------------------------------------------------------------------------------------------------------------------------------------------------------------------------------------------------------------------------------------------------------------------------------------------------------------------------------------------------------------------------------------------------------------------------------------------------------------------------------------------------------------------------------------------------------------------------------------------------------------------------------------------------------------------------------------------------------------------------------------------------------------------------------------------------------------------------------------------------------------------------------------------------------------------------------------------------------------------------------------------------------------------------------------------------------------------------------------------------------------------------------------------------------------------------------------------------------------------------------------------------------------------------------------------------------------------------------------------------------------------------------------------------------------------------------------------------------------------------------------------------------------------------------------------------------------------------------------------------------------------------------------------------------------------------------------------------------------------------------------------------------------------------------------------------------------------------------------------------------------------------------------------------------------------------------------------------------------------------------------------------------------------------------------------------------------------------------------------------------------------------------------------------------------------------------------------------------------------------------------------------------------------------------------------------------------------------------------------------------------------------------------------------------------------------------------------------------------------------------------------------------------------------------------------------------------------------------------------------------------------------------------------------------------------------------------------------------------------------------------------------------------------------------------------------------------------------------------------------------------------------------------------------------------------------------------------------------------------------------------------------------------------------------------------------------------------------------------------------------------------------------------------------------------------------------------------------------------------------------------------------------------------------------------------------------------------------------------------------------------------------------------------------------------------------------------------------------------------------------------------------------------------------------------------------------------------------------------------------------------------------------------------------------------------------------------------------------------------------------------------------------------------------------------------------------------------------------------------------------------------------------------------------------------------------------------------------------------------------------------------------------------------------------------------------------------------------------------------------------------------------------------------------------------------------------------------------------------------------------------------------------------------------------------------------------------------------------------------------------------------------------------------------------------------------------------------------------------------------------------------------------------------------------------------------------------------------------------------------------------------------------------------------------------------------------------------------------------------------------------------------------------------------------------------------------------------------------------------------------------------------------------------------------------------------------------------------------------------------------------------------------------------------------------------------------------------------------------------------------------------------------------------------------------------------------------------------------------------------------------------------------------------------------------------------------------------------------------------------------------------------------------------------------------------------------------------------------------------------------------------------------------------------------------------------------------------------------------------------------------------------------------------------------------------------------------------------------------------------------------------------------------------------------------------------------------------------------------------------------------------------------------------------------------------------------------------------------------------------------------------------------------------------------------------------------------------------------------------------------------------------------------------------------------------------------------------------|



|  |  |                                                                                                                                                                                                                                                                                                                                                                                                                                                                                                                                                                                                                                                                                                                                                                                                                                                                                                                                                                                                                                                                                                                                                                                                                            |                                                                                                                                                                                                                                                                                                                                                                                                                                                                                                                                                                                                                                                                                                                                                                                                                                                                                                                                                                                                                                                                                                                                                                                                                                                                                                                                                                                                                                                                                                                                                                                                                                                                                                                                                                                                                                                                                                                                                                                                                                                                                                                                                                                                                                                                                                                                                                                                                                                                                                                                                                                                                                                                                                                                                                                                                                                                                                                                                                                                                                                                                                                                                                                                                                                                                                                                                                                                                                                                                                                                                                                                                                                                                                                                                                                                                                                                                                                                                                                                                                                                                                                                                                                                                                                                                                                                                                                                                                                                                                                                                                                                                                                                                                                                                                                                                                                                                                                                                                                                                                                                                                                                                                                                                                                                                                                                                                                                                                                                                                                                                                                                                                                                                                                                                                                                                                                                                                                                                                                                                                                                                                                                                                                                                                                                                                                                                                                                                                                                                                                                                                                                                                                                                                                                                                                                                                                                                                                         |
|--|--|----------------------------------------------------------------------------------------------------------------------------------------------------------------------------------------------------------------------------------------------------------------------------------------------------------------------------------------------------------------------------------------------------------------------------------------------------------------------------------------------------------------------------------------------------------------------------------------------------------------------------------------------------------------------------------------------------------------------------------------------------------------------------------------------------------------------------------------------------------------------------------------------------------------------------------------------------------------------------------------------------------------------------------------------------------------------------------------------------------------------------------------------------------------------------------------------------------------------------|-------------------------------------------------------------------------------------------------------------------------------------------------------------------------------------------------------------------------------------------------------------------------------------------------------------------------------------------------------------------------------------------------------------------------------------------------------------------------------------------------------------------------------------------------------------------------------------------------------------------------------------------------------------------------------------------------------------------------------------------------------------------------------------------------------------------------------------------------------------------------------------------------------------------------------------------------------------------------------------------------------------------------------------------------------------------------------------------------------------------------------------------------------------------------------------------------------------------------------------------------------------------------------------------------------------------------------------------------------------------------------------------------------------------------------------------------------------------------------------------------------------------------------------------------------------------------------------------------------------------------------------------------------------------------------------------------------------------------------------------------------------------------------------------------------------------------------------------------------------------------------------------------------------------------------------------------------------------------------------------------------------------------------------------------------------------------------------------------------------------------------------------------------------------------------------------------------------------------------------------------------------------------------------------------------------------------------------------------------------------------------------------------------------------------------------------------------------------------------------------------------------------------------------------------------------------------------------------------------------------------------------------------------------------------------------------------------------------------------------------------------------------------------------------------------------------------------------------------------------------------------------------------------------------------------------------------------------------------------------------------------------------------------------------------------------------------------------------------------------------------------------------------------------------------------------------------------------------------------------------------------------------------------------------------------------------------------------------------------------------------------------------------------------------------------------------------------------------------------------------------------------------------------------------------------------------------------------------------------------------------------------------------------------------------------------------------------------------------------------------------------------------------------------------------------------------------------------------------------------------------------------------------------------------------------------------------------------------------------------------------------------------------------------------------------------------------------------------------------------------------------------------------------------------------------------------------------------------------------------------------------------------------------------------------------------------------------------------------------------------------------------------------------------------------------------------------------------------------------------------------------------------------------------------------------------------------------------------------------------------------------------------------------------------------------------------------------------------------------------------------------------------------------------------------------------------------------------------------------------------------------------------------------------------------------------------------------------------------------------------------------------------------------------------------------------------------------------------------------------------------------------------------------------------------------------------------------------------------------------------------------------------------------------------------------------------------------------------------------------------------------------------------------------------------------------------------------------------------------------------------------------------------------------------------------------------------------------------------------------------------------------------------------------------------------------------------------------------------------------------------------------------------------------------------------------------------------------------------------------------------------------------------------------------------------------------------------------------------------------------------------------------------------------------------------------------------------------------------------------------------------------------------------------------------------------------------------------------------------------------------------------------------------------------------------------------------------------------------------------------------------------------------------------------------------------------------------------------------------------------------------------------------------------------------------------------------------------------------------------------------------------------------------------------------------------------------------------------------------------------------------------------------------------------------------------------------------------------------------------------------------------------------------------------------|
|  |  | <p>formyltransferase, ec:2.1.2.2 - formyltransferase, ec:2.1.2.1 - hydroxymethyltransferase, ec:2.3.1.61 - succinyltransferase, ec:4.1.2.13 - aldolase, ec:6.3.4.5 - synthase, ec:4.2.1.9 - dehydratase, ec:4.2.1.3 - hydratase, ec:4.2.1.2 - hydratase, ec:3.5.3.1 - arginine amidinase, ec:2.7.2.11 - 5-kinase, ec:6.3.2.6 - synthase, ec:2.7.1.2 - glucokinase (phosphorylating), ec:4.2.3.4 - synthase, ec:5.1.3.1 - 3-epimerase, ec:3.1.3.18 - phosphatase, ec:3.1.3.11 - hexose diphosphatase, ec:2.7.7.4 - adenyltransferase, ec:3.1.3.25 - phosphatase, ec:2.7.7.9 - uridyltransferase, ec:2.3.1.31 - O-acetyltransferase, ec:2.3.1.30 - O-acetyltransferase, ec:2.3.1.35 - N-acetyltransferase, ec:6.3.4.13 - ligase, ec:1.1.1.267 - reductoisomerase, ec:3.1.1.31 - phosphogluconolactonase, ec:5.4.99.7 - synthase, ec:5.4.99.5 - mutase, ec:2.1.1.100 - O-methyltransferase, ec:4.2.1.22 - beta-synthase, ec:4.2.1.20 - synthase, ec:2.5.1.47 - synthase, ec:4.2.1.11 - hydratase, ec:4.2.1.10 - dehydratase, ec:2.5.1.54 - synthase, ec:2.5.1.58 - farnesyltransferase, ec:4.2.1.17 - hydratase, ec:1.4.1.14 - synthase (NADH), ec:1.4.1.13 - synthase (NADPH), ec:1.1.3.15 - oxidase, ec:4.2.1.46 - 4,6-</p> | <p>vo_n3_Locus_2623_Transcript_14/17_Confidence_0.556_Length_1555, vo_n3_Locus_74_Transcript_17/25_Confidence_0.436_Length_1764, vo_c1_Locus_788_Transcript_17/34_Confidence_0.404_Length_1861, vo_c1_Locus_788_Transcript_30/34_Confidence_0.255_Length_1712, tri_c_comp19022_c0_seq2, vo_c3_Locus_239_Transcript_24/29_Confidence_0.409_Length_3108, vo_c2_Locus_298_Transcript_10/24_Confidence_0.500_Length_1796, tri_n_comp18813_c0_seq15, vo_n2_Locus_106_Transcript_17/30_Confidence_0.344_Length_2068, tri_n_comp18813_c0_seq11, vo_n1_Locus_2248_Transcript_15/40_Confidence_0.275_Length_1844, tri_n_comp18813_c0_seq10, tri_n_comp20156_c0_seq1, vo_c2_Locus_3634_Transcript_2/8_Confidence_0.467_Length_2376, vo_c1_Locus_788_Transcript_5/34_Confidence_0.340_Length_1423, vo_n2_Locus_2252_Transcript_14/26_Confidence_0.410_Length_2227, vo_c3_Locus_239_Transcript_16/29_Confidence_0.364_Length_1433, vo_c3_Locus_2347_Transcript_16/16_Confidence_0.270_Length_1737, vo_c2_Locus_298_Transcript_21/24_Confidence_0.368_Length_1678, vo_c3_Locus_3927_Transcript_2/9_Confidence_0.250_Length_2629, vo_c2_Locus_3634_Transcript_8/8_Confidence_0.133_Length_2428, vo_c2_Locus_2437_Transcript_14/25_Confidence_0.455_Length_1511, vo_c1_Locus_3033_Transcript_3/5_Confidence_0.400_Length_2348, vo_c3_Locus_239_Transcript_29/29_Confidence_0.182_Length_2208, vo_n3_Locus_2623_Transcript_15/17_Confidence_0.361_Length_1551, vo_c3_Locus_2347_Transcript_5/16_Confidence_0.514_Length_1554, vo_c3_Locus_239_Transcript_19/29_Confidence_0.295_Length_1502, vo_c2_Locus_2437_Transcript_25/25_Confidence_0.159_Length_1517, vo_n2_Locus_2252_Transcript_22/26_Confidence_0.256_Length_2337, vo_n2_Locus_2252_Transcript_23/26_Confidence_0.359_Length_1959, vo_c3_Locus_239_Transcript_10/29_Confidence_0.386_Length_1727, vo_c1_Locus_788_Transcript_6/34_Confidence_0.362_Length_1766, vo_c1_Locus_788_Transcript_22/34_Confidence_0.277_Length_1358, vo_n1_Locus_2248_Transcript_26/40_Confidence_0.333_Length_1991, tri_c_comp20571_c0_seq1, vo_n2_Locus_2252_Transcript_18/26_Confidence_0.256_Length_1506, vo_c1_Locus_788_Transcript_11/34_Confidence_0.213_Length_2514, vo_c2_Locus_907_Transcript_3/3_Confidence_0.333_Length_630, vo_n2_Locus_7087_Transcript_1/2_Confidence_0.500_Length_4087, vo_n1_Locus_2248_Transcript_2/40_Confidence_0.373_Length_1784, vo_n2_Locus_2980_Transcript_1/1_Confidence_0.333_Length_1623, vo_c2_Locus_18300_Transcript_2/3_Confidence_0.200_Length_1671, vo_n2_Locus_9167_Transcript_1/4_Confidence_0.286_Length_6748, vo_n2_Locus_3068_Transcript_2/3_Confidence_0.250_Length_1991, vo_n1_Locus_4025_Transcript_3/5_Confidence_0.286_Length_3475, vo_c1_Locus_9004_Transcript_2/4_Confidence_0.400_Length_3537, vo_c1_Locus_10440_Transcript_1/2_Confidence_0.667_Length_1569, vo_n2_Locus_9037_Transcript_9/15_Confidence_0.486_Length_4553, vo_c2_Locus_684_Transcript_7/16_Confidence_0.194_Length_2803, vo_n3_Locus_2293_Transcript_1/2_Confidence_0.750_Length_1794, vo_n3_Locus_1756_Transcript_10/15_Confidence_0.393_Length_2226, vo_c3_Locus_725_Transcript_6/15_Confidence_0.548_Length_5086, vo_n3_Locus_1756_Transcript_7/15_Confidence_0.250_Length_2226, vo_n2_Locus_16147_Transcript_1/1_Confidence_0.000_Length_1452, vo_n2_Locus_9037_Transcript_2/15_Confidence_0.257_Length_3951, vo_n2_Locus_9037_Transcript_13/15_Confidence_0.143_Length_1729, vo_n2_Locus_9037_Transcript_5/15_Confidence_0.286_Length_2279, vo_n2_Locus_9037_Transcript_6/15_Confidence_0.229_Length_2279, tri_c_comp19644_c0_seq1, vo_n2_Locus_171_Transcript_17/42_Confidence_0.229_Length_1803, tri_c_comp19644_c0_seq4, vo_c3_Locus_12256_Transcript_3/3_Confidence_0.000_Length_508, vo_c3_Locus_725_Transcript_12/15_Confidence_0.290_Length_3194, vo_c1_Locus_6543_Transcript_5/23_Confidence_0.220_Length_2294, vo_n2_Locus_9037_Transcript_12/15_Confidence_0.257_Length_2318, vo_c3_Locus_725_Transcript_13/15_Confidence_0.452_Length_4249, tri_n_comp19211_c0_seq1, vo_c3_Locus_883_Transcript_1/2_Confidence_1.000_Length_1783, vo_n2_Locus_9037_Transcript_1/15_Confidence_0.143_Length_1677, vo_c3_Locus_307_Transcript_2/21_Confidence_0.576_Length_1809, vo_n1_Locus_41_Transcript_20/90_Confidence_0.068_Length_2175, vo_c2_Locus_1667_Transcript_21/21_Confidence_0.195_Length_1788, tri_c_comp80018_c0_seq1, vo_c1_Locus_37084_Transcript_1/2_Confidence_0.667_Length_2193, vo_c3_Locus_20892_Transcript_1/1_Confidence_0.000_Length_2501, vo_c2_Locus_384_Transcript_2/3_Confidence_0.400_Length_1725, tri_c_comp32679_c0_seq1, vo_c1_Locus_10788_Transcript_1/1_Confidence_0.000_Length_1721, vo_c2_Locus_14969_Transcript_4/8_Confidence_0.750_Length_1231, vo_n2_Locus_3786_Transcript_2/4_Confidence_0.778_Length_1466, vo_n2_Locus_3786_Transcript_3/4_Confidence_0.667_Length_1442, vo_c3_Locus_550_Transcript_25/30_Confidence_0.321_Length_1640, vo_c3_Locus_550_Transcript_10/30_Confidence_0.420_Length_1515, vo_n1_Locus_133_Transcript_12/30_Confidence_0.033_Length_580, vo_c2_Locus_320_Transcript_7/32_Confidence_0.299_Length_1642, vo_c3_Locus_550_Transcript_27/30_Confidence_0.395_Length_1758, vo_c2_Locus_320_Transcript_9/32_Confidence_0.338_Length_1673, vo_c2_Locus_320_Transcript_22/32_Confidence_0.545_Length_1648, vo_c3_Locus_550_Transcript_30/30_Confidence_0.210_Length_1413, vo_c3_Locus_550_Transcript_8/30_Confidence_0.148_Length_1492, vo_n3_Locus_587_Transcript_13/22_Confidence_0.444_Length_1456, vo_n2_Locus_105_Transcript_30/33_Confidence_0.449_Length_1990, vo_c3_Locus_550_Transcript_28/30_Confidence_0.309_Length_1831, vo_c2_Locus_320_Transcript_20/32_Confidence_0.325_Length_1586, vo_n1_Locus_133_Transcript_30/30_Confidence_0.033_Length_2622, vo_c2_Locus_320_Transcript_13/32_Confidence_0.351_Length_2604, vo_c2_Locus_320_Transcript_15/32_Confidence_0.390_Length_1557, vo_c3_Locus_1613_Transcript_6/17_Confidence_0.158_Length_5809, vo_n1_Locus_10193_Transcript_1/1_Confidence_0.000_Length_1647, vo_c2_Locus_6348_Transcript_1/2_Confidence_1.000_Length_3755, vo_n3_Locus_23556_Transcript_2/4_Confidence_0.500_Length_4210, tri_c_comp43537_c0_seq1, vo_c2_Locus_15226_Transcript_2/2_Confidence_0.500_Length_2141, tri_c_comp29205_c0_seq1, vo_c1_Locus_2207_Transcript_20/51_Confidence_0.393_Length_3556, vo_c3_Locus_2283_Transcript_28/38_Confidence_0.331_Length_3501, vo_n3_Locus_1164_Transcript_30/46_Confidence_0.400_Length_3745, tri_c_comp20184_c0_seq2, vo_c2_Locus_7270_Transcript_1/1_Confidence_0.500_Length_1488, vo_c1_Locus_31_Transcript_859/1155_Confidence_0.002_Length_1257, vo_n3_Locus_1164_Transcript_32/46_Confidence_0.456_Length_3745, vo_n1_Locus_3448_Transcript_46/64_Confidence_0.085_Length_783, vo_c2_Locus_644_Transcript_12/40_Confidence_0.459_Length_3665, vo_n3_Locus_1164_Transcript_35/46_Confidence_0.511_Length_3745,</p> |
|--|--|----------------------------------------------------------------------------------------------------------------------------------------------------------------------------------------------------------------------------------------------------------------------------------------------------------------------------------------------------------------------------------------------------------------------------------------------------------------------------------------------------------------------------------------------------------------------------------------------------------------------------------------------------------------------------------------------------------------------------------------------------------------------------------------------------------------------------------------------------------------------------------------------------------------------------------------------------------------------------------------------------------------------------------------------------------------------------------------------------------------------------------------------------------------------------------------------------------------------------|-------------------------------------------------------------------------------------------------------------------------------------------------------------------------------------------------------------------------------------------------------------------------------------------------------------------------------------------------------------------------------------------------------------------------------------------------------------------------------------------------------------------------------------------------------------------------------------------------------------------------------------------------------------------------------------------------------------------------------------------------------------------------------------------------------------------------------------------------------------------------------------------------------------------------------------------------------------------------------------------------------------------------------------------------------------------------------------------------------------------------------------------------------------------------------------------------------------------------------------------------------------------------------------------------------------------------------------------------------------------------------------------------------------------------------------------------------------------------------------------------------------------------------------------------------------------------------------------------------------------------------------------------------------------------------------------------------------------------------------------------------------------------------------------------------------------------------------------------------------------------------------------------------------------------------------------------------------------------------------------------------------------------------------------------------------------------------------------------------------------------------------------------------------------------------------------------------------------------------------------------------------------------------------------------------------------------------------------------------------------------------------------------------------------------------------------------------------------------------------------------------------------------------------------------------------------------------------------------------------------------------------------------------------------------------------------------------------------------------------------------------------------------------------------------------------------------------------------------------------------------------------------------------------------------------------------------------------------------------------------------------------------------------------------------------------------------------------------------------------------------------------------------------------------------------------------------------------------------------------------------------------------------------------------------------------------------------------------------------------------------------------------------------------------------------------------------------------------------------------------------------------------------------------------------------------------------------------------------------------------------------------------------------------------------------------------------------------------------------------------------------------------------------------------------------------------------------------------------------------------------------------------------------------------------------------------------------------------------------------------------------------------------------------------------------------------------------------------------------------------------------------------------------------------------------------------------------------------------------------------------------------------------------------------------------------------------------------------------------------------------------------------------------------------------------------------------------------------------------------------------------------------------------------------------------------------------------------------------------------------------------------------------------------------------------------------------------------------------------------------------------------------------------------------------------------------------------------------------------------------------------------------------------------------------------------------------------------------------------------------------------------------------------------------------------------------------------------------------------------------------------------------------------------------------------------------------------------------------------------------------------------------------------------------------------------------------------------------------------------------------------------------------------------------------------------------------------------------------------------------------------------------------------------------------------------------------------------------------------------------------------------------------------------------------------------------------------------------------------------------------------------------------------------------------------------------------------------------------------------------------------------------------------------------------------------------------------------------------------------------------------------------------------------------------------------------------------------------------------------------------------------------------------------------------------------------------------------------------------------------------------------------------------------------------------------------------------------------------------------------------------------------------------------------------------------------------------------------------------------------------------------------------------------------------------------------------------------------------------------------------------------------------------------------------------------------------------------------------------------------------------------------------------------------------------------------------------------------------------------------------------------------------------------------------|

|  |  |                                                                                                                                                                                                                                                                                                                                                                                                                                                                                                                                              |                                                                                                                                                                                                                                                                                                                                                                                                                                                                                                                                                                                                                                                                                                                                                                                                                                                                                                                                                                                                                                                                                                                                                                                                                                                                                                                                                                                                                                                                                                                                                                                                                                                                                                                                                                                                                                                                                                                                                                                                                                                                                                                                                                                                                                                                                                                                                                                                                                                                                                                                                                                                                                                                                                                                                                                                                                                                                                                                                                                                                                                                                                                                                                                                                                                                                                                                                                                                                                                                                                                                                                                                                                                                                                                                                                                                                                                                                                                                                                                                                                                                                                                                                                                                                                                                                                                                                                                                                                                                                                                                                                                                                                                                                                                                                                                                                                                                                                                                                                                                                                                                                                                                                                                                                                                                                                                                                                                                                                                                                                                                                                                                                                                                                                                                                                                                                                                                                                                                                                                                                                                                                                                                                                                                                                                                                                                                                                                                                                                                                                                                                                                                                                                                                                                                                                                                                                                                                                                                                                                                                                                                                                                                           |
|--|--|----------------------------------------------------------------------------------------------------------------------------------------------------------------------------------------------------------------------------------------------------------------------------------------------------------------------------------------------------------------------------------------------------------------------------------------------------------------------------------------------------------------------------------------------|-------------------------------------------------------------------------------------------------------------------------------------------------------------------------------------------------------------------------------------------------------------------------------------------------------------------------------------------------------------------------------------------------------------------------------------------------------------------------------------------------------------------------------------------------------------------------------------------------------------------------------------------------------------------------------------------------------------------------------------------------------------------------------------------------------------------------------------------------------------------------------------------------------------------------------------------------------------------------------------------------------------------------------------------------------------------------------------------------------------------------------------------------------------------------------------------------------------------------------------------------------------------------------------------------------------------------------------------------------------------------------------------------------------------------------------------------------------------------------------------------------------------------------------------------------------------------------------------------------------------------------------------------------------------------------------------------------------------------------------------------------------------------------------------------------------------------------------------------------------------------------------------------------------------------------------------------------------------------------------------------------------------------------------------------------------------------------------------------------------------------------------------------------------------------------------------------------------------------------------------------------------------------------------------------------------------------------------------------------------------------------------------------------------------------------------------------------------------------------------------------------------------------------------------------------------------------------------------------------------------------------------------------------------------------------------------------------------------------------------------------------------------------------------------------------------------------------------------------------------------------------------------------------------------------------------------------------------------------------------------------------------------------------------------------------------------------------------------------------------------------------------------------------------------------------------------------------------------------------------------------------------------------------------------------------------------------------------------------------------------------------------------------------------------------------------------------------------------------------------------------------------------------------------------------------------------------------------------------------------------------------------------------------------------------------------------------------------------------------------------------------------------------------------------------------------------------------------------------------------------------------------------------------------------------------------------------------------------------------------------------------------------------------------------------------------------------------------------------------------------------------------------------------------------------------------------------------------------------------------------------------------------------------------------------------------------------------------------------------------------------------------------------------------------------------------------------------------------------------------------------------------------------------------------------------------------------------------------------------------------------------------------------------------------------------------------------------------------------------------------------------------------------------------------------------------------------------------------------------------------------------------------------------------------------------------------------------------------------------------------------------------------------------------------------------------------------------------------------------------------------------------------------------------------------------------------------------------------------------------------------------------------------------------------------------------------------------------------------------------------------------------------------------------------------------------------------------------------------------------------------------------------------------------------------------------------------------------------------------------------------------------------------------------------------------------------------------------------------------------------------------------------------------------------------------------------------------------------------------------------------------------------------------------------------------------------------------------------------------------------------------------------------------------------------------------------------------------------------------------------------------------------------------------------------------------------------------------------------------------------------------------------------------------------------------------------------------------------------------------------------------------------------------------------------------------------------------------------------------------------------------------------------------------------------------------------------------------------------------------------------------------------------------------------------------------------------------------------------------------------------------------------------------------------------------------------------------------------------------------------------------------------------------------------------------------------------------------------------------------------------------------------------------------------------------------------------------------------------------------------------------------------|
|  |  | <p>dehydratase, ec:1.1.1.86 - reductoisomerase (NADP+), ec:1.1.1.37 - dehydrogenase, ec:1.1.1.35 - dehydrogenase, ec:1.1.1.44 - dehydrogenase (NADP+-dependent, decarboxylating), ec:1.1.1.42 - dehydrogenase (NADP+), ec:1.1.1.49 - dehydrogenase (NADP+), ec:5.4.2.2 - (alpha-D-glucose-1,6-bisphosphate-dependent), ec:5.4.2.3 - mutase, ec:1.2.4.2 - dehydrogenase (succinyl-transferring), ec:1.2.4.4 - dehydrogenase (2-methylpropanoyl-transferring), ec:3.5.4.10 - cyclohydrolase, ec:5.3.1.24 - isomerase, ec:2.7.4.10 - kinase</p> | <p>vo_c3_Locus_5_Transcript_229/353_Confidence_0.004_Length_952, vo_c2_Locus_644_Transcript_3/40_Confidence_0.071_Length_957, vo_n1_Locus_3448_Transcript_53/64_Confidence_0.225_Length_3567, vo_n2_Locus_386_Transcript_32/33_Confidence_0.208_Length_3664, vo_n1_Locus_3448_Transcript_63/64_Confidence_0.318_Length_3637, vo_n3_Locus_1164_Transcript_33/46_Confidence_0.456_Length_3748, vo_c3_Locus_2283_Transcript_26/38_Confidence_0.285_Length_3501, vo_n2_Locus_386_Transcript_22/33_Confidence_0.376_Length_3568, vo_c3_Locus_2283_Transcript_29/38_Confidence_0.292_Length_3501, vo_n2_Locus_386_Transcript_1/33_Confidence_0.139_Length_3600, vo_c2_Locus_644_Transcript_24/40_Confidence_0.398_Length_3511, vo_n3_Locus_1164_Transcript_43/46_Confidence_0.389_Length_3338, vo_c1_Locus_2207_Transcript_39/51_Confidence_0.250_Length_3586, vo_c3_Locus_79_Transcript_1/3_Confidence_0.200_Length_5222, vo_c2_Locus_52_Transcript_234/466_Confidence_0.003_Length_1462, vo_n2_Locus_386_Transcript_10/33_Confidence_0.376_Length_3676, vo_n1_Locus_1394_Transcript_2/3_Confidence_0.400_Length_2232, tri_n_comp19507_c0_seq6, tri_c_comp32056_c0_seq1, vo_c3_Locus_79_Transcript_1/3_Confidence_0.200_Length_5222, vo_n1_Locus_1394_Transcript_2/3_Confidence_0.400_Length_2232, vo_n2_Locus_2182_Transcript_14/15_Confidence_0.458_Length_3129, vo_c1_Locus_1462_Transcript_1/46_Confidence_0.182_Length_2129, vo_c1_Locus_1462_Transcript_8/46_Confidence_0.530_Length_9104, vo_c2_Locus_642_Transcript_3/10_Confidence_0.571_Length_2141, vo_n3_Locus_9269_Transcript_1/1_Confidence_0.000_Length_2238, vo_n2_Locus_19315_Transcript_2/2_Confidence_0.000_Length_1802, tri_c_comp29205_c0_seq1, vo_c2_Locus_1643_Transcript_1/1_Confidence_0.000_Length_1756, vo_c1_Locus_3806_Transcript_1/1_Confidence_0.000_Length_1482, vo_n2_Locus_3068_Transcript_2/3_Confidence_0.250_Length_1991, vo_n1_Locus_4025_Transcript_3/5_Confidence_0.286_Length_3475, vo_c1_Locus_9004_Transcript_2/4_Confidence_0.400_Length_3537, vo_c1_Locus_10440_Transcript_1/2_Confidence_0.667_Length_1569, vo_c3_Locus_550_Transcript_25/30_Confidence_0.321_Length_1640, vo_c3_Locus_550_Transcript_10/30_Confidence_0.420_Length_1515, vo_n1_Locus_133_Transcript_12/30_Confidence_0.033_Length_580, vo_n2_Locus_13049_Transcript_20/20_Confidence_0.289_Length_1233, vo_c3_Locus_1015_Transcript_30/32_Confidence_0.181_Length_1172, vo_n2_Locus_13049_Transcript_19/20_Confidence_0.368_Length_1268, vo_c3_Locus_550_Transcript_27/30_Confidence_0.395_Length_1758, vo_n1_Locus_296_Transcript_24/31_Confidence_0.275_Length_1182, vo_n2_Locus_13049_Transcript_17/20_Confidence_0.342_Length_1329, vo_c3_Locus_1015_Transcript_13/32_Confidence_0.222_Length_1363, vo_c2_Locus_1551_Transcript_19/27_Confidence_0.222_Length_1248, vo_n1_Locus_296_Transcript_27/31_Confidence_0.078_Length_2886, vo_c3_Locus_1015_Transcript_3/32_Confidence_0.181_Length_1206, vo_n2_Locus_105_Transcript_30/33_Confidence_0.449_Length_1990, vo_n3_Locus_550_Transcript_28/30_Confidence_0.309_Length_1831, vo_n3_Locus_150_Transcript_17/25_Confidence_0.183_Length_1185, vo_n3_Locus_150_Transcript_6/25_Confidence_0.232_Length_1192, vo_n1_Locus_133_Transcript_30/30_Confidence_0.033_Length_2622, tri_c_comp21115_c0_seq1, vo_n3_Locus_587_Transcript_2/22_Confidence_0.111_Length_206, vo_c2_Locus_320_Transcript_13/32_Confidence_0.351_Length_2604, vo_n1_Locus_296_Transcript_25/31_Confidence_0.157_Length_1180, vo_n2_Locus_13049_Transcript_7/20_Confidence_0.421_Length_1354, vo_c1_Locus_223_Transcript_13/65_Confidence_0.197_Length_1636, vo_c1_Locus_223_Transcript_47/65_Confidence_0.099_Length_1259, vo_c2_Locus_320_Transcript_7/32_Confidence_0.299_Length_1642, vo_n1_Locus_133_Transcript_14/30_Confidence_0.456_Length_2738, vo_c3_Locus_1015_Transcript_12/32_Confidence_0.222_Length_1270, vo_c2_Locus_320_Transcript_9/32_Confidence_0.338_Length_1673, vo_c2_Locus_320_Transcript_22/32_Confidence_0.545_Length_1648, vo_n1_Locus_296_Transcript_23/31_Confidence_0.294_Length_1182, vo_n2_Locus_13049_Transcript_9/20_Confidence_0.316_Length_1224, vo_c1_Locus_223_Transcript_52/65_Confidence_0.042_Length_799, vo_c3_Locus_550_Transcript_30/30_Confidence_0.210_Length_1413, vo_n1_Locus_133_Transcript_13/30_Confidence_0.456_Length_2508, vo_n1_Locus_133_Transcript_24/30_Confidence_0.311_Length_1984, vo_n1_Locus_296_Transcript_30/31_Confidence_0.078_Length_1319, vo_n1_Locus_133_Transcript_15/30_Confidence_0.456_Length_2671, vo_c2_Locus_320_Transcript_20/32_Confidence_0.325_Length_1586, vo_c1_Locus_223_Transcript_19/65_Confidence_0.092_Length_1454, vo_n1_Locus_296_Transcript_10/31_Confidence_0.118_Length_1164, vo_c1_Locus_223_Transcript_54/65_Confidence_0.134_Length_1458, vo_c2_Locus_320_Transcript_15/32_Confidence_0.390_Length_1557, vo_c3_Locus_1015_Transcript_9/32_Confidence_0.236_Length_1272, vo_n1_Locus_133_Transcript_25/30_Confidence_0.278_Length_2179, vo_n1_Locus_24_Transcript_2/4_Confidence_0.667_Length_1878, vo_c2_Locus_14475_Transcript_1/1_Confidence_0.000_Length_1444, vo_c2_Locus_15226_Transcript_2/2_Confidence_0.500_Length_2141, vo_c3_Locus_18398_Transcript_2/2_Confidence_0.000_Length_715, vo_n2_Locus_18825_Transcript_1/3_Confidence_0.500_Length_1632, tri_c_comp33638_c0_seq1, vo_n2_Locus_8943_Transcript_1/2_Confidence_0.750_Length_1351, vo_n1_Locus_32462_Transcript_1/1_Confidence_0.000_Length_1047, vo_n2_Locus_24260_Transcript_2/3_Confidence_0.250_Length_976, vo_c1_Locus_22485_Transcript_1/2_Confidence_0.500_Length_1035, vo_n3_Locus_6810_Transcript_2/3_Confidence_0.913_Length_1699, vo_n1_Locus_6460_Transcript_1/1_Confidence_0.000_Length_1912, tri_c_comp29205_c0_seq1, vo_n2_Locus_26426_Transcript_1/1_Confidence_0.000_Length_3133, tri_c_comp37590_c0_seq1, vo_n2_Locus_15100_Transcript_1/9_Confidence_0.417_Length_1002, tri_n_comp46466_c0_seq1, vo_c2_Locus_3634_Transcript_8/8_Confidence_0.133_Length_2428, vo_c2_Locus_324_Transcript_5/12_Confidence_0.333_Length_1009, vo_n1_Locus_5721_Transcript_6/9_Confidence_0.389_Length_989, vo_c2_Locus_324_Transcript_11/12_Confidence_0.333_Length_4393, vo_n2_Locus_475_Transcript_7/13_Confidence_0.312_Length_1141, vo_n1_Locus_5721_Transcript_1/9_Confidence_0.278_Length_986, vo_n2_Locus_475_Transcript_2/13_Confidence_0.312_Length_1187, vo_c2_Locus_324_Transcript_2/12_Confidence_0.400_Length_1106, vo_c3_Locus_3927_Transcript_2/9_Confidence_0.250_Length_2629, vo_c2_Locus_1828_Transcript_1/2_Confidence_0.963_Length_1886, vo_n2_Locus_19533_Transcript_1/1_Confidence_0.000_Length_1783, vo_c1_Locus_34898_Transcript_1/1_Confidence_0.000_Length_1083, vo_n2_Locus_8097_Transcript_1/6_Confidence_0.500_Length_1196, vo_n2_Locus_11241_Transcript_1/3_Confidence_0.600_Length_3773, vo_c2_Locus_479_Transcript_1/2_Confidence_1.000_Length_2154, vo_c2_Locus_11041_Transcript_1/2_Confidence_0.750_Length_1378, vo_c2_Locus_11041_Transcript_2/2_Confidence_0.000_Length_1411, vo_c3_Locus_22219_Transcript_1/1_Confidence_0.000_Length_1123,</p> |
|--|--|----------------------------------------------------------------------------------------------------------------------------------------------------------------------------------------------------------------------------------------------------------------------------------------------------------------------------------------------------------------------------------------------------------------------------------------------------------------------------------------------------------------------------------------------|-------------------------------------------------------------------------------------------------------------------------------------------------------------------------------------------------------------------------------------------------------------------------------------------------------------------------------------------------------------------------------------------------------------------------------------------------------------------------------------------------------------------------------------------------------------------------------------------------------------------------------------------------------------------------------------------------------------------------------------------------------------------------------------------------------------------------------------------------------------------------------------------------------------------------------------------------------------------------------------------------------------------------------------------------------------------------------------------------------------------------------------------------------------------------------------------------------------------------------------------------------------------------------------------------------------------------------------------------------------------------------------------------------------------------------------------------------------------------------------------------------------------------------------------------------------------------------------------------------------------------------------------------------------------------------------------------------------------------------------------------------------------------------------------------------------------------------------------------------------------------------------------------------------------------------------------------------------------------------------------------------------------------------------------------------------------------------------------------------------------------------------------------------------------------------------------------------------------------------------------------------------------------------------------------------------------------------------------------------------------------------------------------------------------------------------------------------------------------------------------------------------------------------------------------------------------------------------------------------------------------------------------------------------------------------------------------------------------------------------------------------------------------------------------------------------------------------------------------------------------------------------------------------------------------------------------------------------------------------------------------------------------------------------------------------------------------------------------------------------------------------------------------------------------------------------------------------------------------------------------------------------------------------------------------------------------------------------------------------------------------------------------------------------------------------------------------------------------------------------------------------------------------------------------------------------------------------------------------------------------------------------------------------------------------------------------------------------------------------------------------------------------------------------------------------------------------------------------------------------------------------------------------------------------------------------------------------------------------------------------------------------------------------------------------------------------------------------------------------------------------------------------------------------------------------------------------------------------------------------------------------------------------------------------------------------------------------------------------------------------------------------------------------------------------------------------------------------------------------------------------------------------------------------------------------------------------------------------------------------------------------------------------------------------------------------------------------------------------------------------------------------------------------------------------------------------------------------------------------------------------------------------------------------------------------------------------------------------------------------------------------------------------------------------------------------------------------------------------------------------------------------------------------------------------------------------------------------------------------------------------------------------------------------------------------------------------------------------------------------------------------------------------------------------------------------------------------------------------------------------------------------------------------------------------------------------------------------------------------------------------------------------------------------------------------------------------------------------------------------------------------------------------------------------------------------------------------------------------------------------------------------------------------------------------------------------------------------------------------------------------------------------------------------------------------------------------------------------------------------------------------------------------------------------------------------------------------------------------------------------------------------------------------------------------------------------------------------------------------------------------------------------------------------------------------------------------------------------------------------------------------------------------------------------------------------------------------------------------------------------------------------------------------------------------------------------------------------------------------------------------------------------------------------------------------------------------------------------------------------------------------------------------------------------------------------------------------------------------------------------------------------------------------------------------------------------------------------------------------------------------------------------|

|  |  |  |  |                                                                                                                                                                                                                                                                                                                                                                                                                                                                                                                                                                                                                                                                                                                                                                                                                                                                                                                                                                                                                                                                                                                                                                                                                                                                                                                                                                                                                                                                                                                                                                                                                                                                                                                                                                                                                                                                                                                                                                                                                                                                                                                                                                                                                                                                                                                                                                                                                                                                                                                                                                                                                                                                                                                                                                                                                                                                                                                                                                                                                                                                                                                                                                                                                                                                                                                                                                                                                                                                                                                                                                                                                                                                                                                                                                                                                                                                                                                                                                                                                                                                                                                                                                                                                                                                                                                                                                                                                                                                                                                                                                                                                                                                                                                                                                                                                                                                                                                                                                                                                                                                                                                                                                                                                                                                                                                                                                                                                                                                                                                                                                                                                                                                                                                                                                                                                                                                                                                                                                                                                                                                                                                                                                                                                                                                                                                                                                                                                                                                                                                                                                                                                                                                                                                                                                                                    |
|--|--|--|--|----------------------------------------------------------------------------------------------------------------------------------------------------------------------------------------------------------------------------------------------------------------------------------------------------------------------------------------------------------------------------------------------------------------------------------------------------------------------------------------------------------------------------------------------------------------------------------------------------------------------------------------------------------------------------------------------------------------------------------------------------------------------------------------------------------------------------------------------------------------------------------------------------------------------------------------------------------------------------------------------------------------------------------------------------------------------------------------------------------------------------------------------------------------------------------------------------------------------------------------------------------------------------------------------------------------------------------------------------------------------------------------------------------------------------------------------------------------------------------------------------------------------------------------------------------------------------------------------------------------------------------------------------------------------------------------------------------------------------------------------------------------------------------------------------------------------------------------------------------------------------------------------------------------------------------------------------------------------------------------------------------------------------------------------------------------------------------------------------------------------------------------------------------------------------------------------------------------------------------------------------------------------------------------------------------------------------------------------------------------------------------------------------------------------------------------------------------------------------------------------------------------------------------------------------------------------------------------------------------------------------------------------------------------------------------------------------------------------------------------------------------------------------------------------------------------------------------------------------------------------------------------------------------------------------------------------------------------------------------------------------------------------------------------------------------------------------------------------------------------------------------------------------------------------------------------------------------------------------------------------------------------------------------------------------------------------------------------------------------------------------------------------------------------------------------------------------------------------------------------------------------------------------------------------------------------------------------------------------------------------------------------------------------------------------------------------------------------------------------------------------------------------------------------------------------------------------------------------------------------------------------------------------------------------------------------------------------------------------------------------------------------------------------------------------------------------------------------------------------------------------------------------------------------------------------------------------------------------------------------------------------------------------------------------------------------------------------------------------------------------------------------------------------------------------------------------------------------------------------------------------------------------------------------------------------------------------------------------------------------------------------------------------------------------------------------------------------------------------------------------------------------------------------------------------------------------------------------------------------------------------------------------------------------------------------------------------------------------------------------------------------------------------------------------------------------------------------------------------------------------------------------------------------------------------------------------------------------------------------------------------------------------------------------------------------------------------------------------------------------------------------------------------------------------------------------------------------------------------------------------------------------------------------------------------------------------------------------------------------------------------------------------------------------------------------------------------------------------------------------------------------------------------------------------------------------------------------------------------------------------------------------------------------------------------------------------------------------------------------------------------------------------------------------------------------------------------------------------------------------------------------------------------------------------------------------------------------------------------------------------------------------------------------------------------------------------------------------------------------------------------------------------------------------------------------------------------------------------------------------------------------------------------------------------------------------------------------------------------------------------------------------------------------------------------------------------------------------------------------------------------------------------------------------------------|
|  |  |  |  | <p>vo_c3_Locus_3840_Transcript_2/5_Confidence_0.200_Length_1699, vo_c2_Locus_27691_Transcript_1/2_Confidence_0.750_Length_923, tri_c_comp11242_c0_seq2, tri_n_comp64914_c0_seq1, vo_c2_Locus_9062_Transcript_10/11_Confidence_0.312_Length_4945, vo_n2_Locus_22224_Transcript_1/1_Confidence_0.000_Length_1370, tri_n_comp14915_c0_seq1, vo_n3_Locus_15713_Transcript_4/7_Confidence_0.429_Length_2557, tri_c_comp37399_c0_seq1, tri_n_comp58061_c0_seq1, vo_n1_Locus_22736_Transcript_1/2_Confidence_0.333_Length_1213, vo_n2_Locus_19677_Transcript_1/1_Confidence_0.000_Length_2823, vo_c2_Locus_10862_Transcript_1/1_Confidence_0.000_Length_1564, vo_n1_Locus_3423_Transcript_2/4_Confidence_0.250_Length_1347, tri_n_comp27683_c0_seq1, vo_c1_Locus_3127_Transcript_1/1_Confidence_0.000_Length_1478, vo_n1_Locus_3423_Transcript_3/4_Confidence_0.250_Length_1416, tri_c_comp43842_c0_seq1, vo_c2_Locus_30746_Transcript_1/1_Confidence_0.000_Length_1279, vo_n1_Locus_2779_Transcript_1/2_Confidence_0.333_Length_2962, vo_c2_Locus_30746_Transcript_1/1_Confidence_0.000_Length_1279, tri_c_comp34117_c0_seq1, vo_c2_Locus_15226_Transcript_2/2_Confidence_0.500_Length_2141, vo_c2_Locus_15226_Transcript_2/2_Confidence_0.500_Length_2141, tri_c_comp55340_c0_seq1, vo_n1_Locus_19864_Transcript_2/2_Confidence_0.000_Length_2707, vo_c3_Locus_21741_Transcript_5/9_Confidence_0.583_Length_1757, vo_n3_Locus_25600_Transcript_5/6_Confidence_0.375_Length_1777, tri_n_comp58061_c0_seq1, tri_c_comp31460_c0_seq1, vo_n2_Locus_4794_Transcript_3/3_Confidence_0.000_Length_966, vo_c1_Locus_2657_Transcript_1/1_Confidence_0.000_Length_1513, vo_n2_Locus_23058_Transcript_1/1_Confidence_0.000_Length_1342, vo_n2_Locus_4233_Transcript_1/2_Confidence_1.000_Length_2049, tri_c_comp42317_c0_seq1, vo_n2_Locus_7374_Transcript_2/3_Confidence_0.750_Length_1746, vo_n2_Locus_8711_Transcript_5/5_Confidence_0.067_Length_1558, vo_c2_Locus_11984_Transcript_2/6_Confidence_0.385_Length_1557, vo_c2_Locus_31468_Transcript_4/5_Confidence_0.667_Length_1579, vo_n1_Locus_3498_Transcript_1/3_Confidence_0.600_Length_1462, tri_c_comp30049_c0_seq1, vo_n1_Locus_833_Transcript_2/6_Confidence_0.333_Length_2200, vo_n2_Locus_3042_Transcript_2/3_Confidence_0.750_Length_2030, vo_c1_Locus_6244_Transcript_1/2_Confidence_0.750_Length_1731, vo_c3_Locus_7185_Transcript_2/3_Confidence_0.333_Length_1661, vo_c3_Locus_7565_Transcript_10/13_Confidence_0.400_Length_4317, tri_c_comp16509_c0_seq1, vo_c3_Locus_7565_Transcript_1/13_Confidence_0.375_Length_4301, vo_n1_Locus_4052_Transcript_3/24_Confidence_0.524_Length_4370, vo_c1_Locus_12613_Transcript_1/1_Confidence_0.000_Length_2362, vo_c1_Locus_2207_Transcript_20/51_Confidence_0.393_Length_3556, vo_c3_Locus_2283_Transcript_28/38_Confidence_0.331_Length_3501, vo_n3_Locus_1164_Transcript_30/46_Confidence_0.400_Length_3745, tri_c_comp20184_c0_seq2, vo_n3_Locus_1164_Transcript_32/46_Confidence_0.456_Length_3745, vo_n1_Locus_3448_Transcript_1/64_Confidence_0.062_Length_478, vo_n1_Locus_3448_Transcript_46/64_Confidence_0.085_Length_783, vo_c2_Locus_644_Transcript_12/40_Confidence_0.459_Length_3665, vo_n3_Locus_1164_Transcript_35/46_Confidence_0.511_Length_3745, vo_c2_Locus_644_Transcript_3/40_Confidence_0.071_Length_957, vo_n1_Locus_3448_Transcript_53/64_Confidence_0.225_Length_3567, vo_n2_Locus_386_Transcript_32/33_Confidence_0.208_Length_3664, vo_n1_Locus_3448_Transcript_63/64_Confidence_0.318_Length_3637, vo_n3_Locus_1164_Transcript_33/46_Confidence_0.456_Length_3748, vo_c3_Locus_2283_Transcript_26/38_Confidence_0.285_Length_3501, vo_n2_Locus_386_Transcript_22/33_Confidence_0.376_Length_3568, vo_n1_Locus_3448_Transcript_2/64_Confidence_0.054_Length_402, vo_c3_Locus_2283_Transcript_29/38_Confidence_0.292_Length_3501, vo_c3_Locus_2283_Transcript_35/38_Confidence_0.400_Length_3582, vo_n2_Locus_386_Transcript_1/33_Confidence_0.139_Length_3600, vo_c2_Locus_644_Transcript_24/40_Confidence_0.398_Length_3511, vo_n3_Locus_1164_Transcript_43/46_Confidence_0.389_Length_3338, vo_c1_Locus_2207_Transcript_39/51_Confidence_0.250_Length_3586, vo_c3_Locus_79_Transcript_1/3_Confidence_0.200_Length_5222, vo_n2_Locus_386_Transcript_10/33_Confidence_0.376_Length_3676, vo_n1_Locus_1394_Transcript_2/3_Confidence_0.400_Length_2232, vo_c2_Locus_644_Transcript_6/40_Confidence_0.204_Length_3616, vo_c1_Locus_2207_Transcript_36/51_Confidence_0.402_Length_3407, vo_n2_Locus_386_Transcript_5/33_Confidence_0.040_Length_566, tri_n_comp19507_c0_seq6, vo_n1_Locus_3448_Transcript_55/64_Confidence_0.233_Length_3564, vo_c3_Locus_7050_Transcript_5/6_Confidence_0.667_Length_1047, tri_c_comp23673_c0_seq1, vo_c3_Locus_4005_Transcript_5/6_Confidence_0.167_Length_1517, vo_c1_Locus_6811_Transcript_7/8_Confidence_0.364_Length_589, vo_n2_Locus_297_Transcript_2/5_Confidence_0.636_Length_1679, vo_c2_Locus_1080_Transcript_4/21_Confidence_0.241_Length_1741, vo_c2_Locus_1080_Transcript_3/21_Confidence_0.207_Length_1702, vo_n3_Locus_1253_Transcript_1/2_Confidence_0.500_Length_1626, vo_c2_Locus_1080_Transcript_8/21_Confidence_0.138_Length_1077, vo_c2_Locus_4581_Transcript_3/8_Confidence_0.684_Length_1578, vo_n2_Locus_901_Transcript_1/95_Confidence_0.023_Length_1512, vo_n2_Locus_20307_Transcript_6/7_Confidence_0.062_Length_2030, vo_n3_Locus_1253_Transcript_2/2_Confidence_0.000_Length_1587, vo_n2_Locus_1937_Transcript_10/11_Confidence_0.615_Length_3407, vo_n1_Locus_1386_Transcript_4/9_Confidence_0.688_Length_3621, vo_n1_Locus_1386_Transcript_9/9_Confidence_0.250_Length_2403, vo_n1_Locus_1386_Transcript_5/9_Confidence_0.625_Length_3599, vo_n1_Locus_1386_Transcript_7/9_Confidence_0.438_Length_3591, vo_n3_Locus_12585_Transcript_4/4_Confidence_0.000_Length_3579, vo_n2_Locus_1937_Transcript_10/11_Confidence_0.615_Length_3407, vo_n1_Locus_1386_Transcript_4/9_Confidence_0.688_Length_3621, vo_n1_Locus_1386_Transcript_9/9_Confidence_0.250_Length_2403, vo_n1_Locus_1386_Transcript_5/9_Confidence_0.625_Length_3599, vo_n1_Locus_1386_Transcript_7/9_Confidence_0.438_Length_3591, vo_n3_Locus_12585_Transcript_4/4_Confidence_0.000_Length_3579, vo_c2_Locus_1643_Transcript_1/1_Confidence_0.000_Length_1756, vo_n2_Locus_634_Transcript_4/6_Confidence_0.357_Length_8557, tri_c_comp57035_c0_seq1, vo_c1_Locus_1809_Transcript_1/1_Confidence_0.000_Length_3087, vo_c3_Locus_18718_Transcript_1/1_Confidence_0.000_Length_2686, vo_c1_Locus_1055_Transcript_9/11_Confidence_0.357_Length_2035, vo_n1_Locus_561_Transcript_9/10_Confidence_0.462_Length_2182, vo_n2_Locus_3954_Transcript_2/8_Confidence_0.478_Length_2452, vo_c3_Locus_289_Transcript_1/7_Confidence_0.381_Length_2114,</p> |
|--|--|--|--|----------------------------------------------------------------------------------------------------------------------------------------------------------------------------------------------------------------------------------------------------------------------------------------------------------------------------------------------------------------------------------------------------------------------------------------------------------------------------------------------------------------------------------------------------------------------------------------------------------------------------------------------------------------------------------------------------------------------------------------------------------------------------------------------------------------------------------------------------------------------------------------------------------------------------------------------------------------------------------------------------------------------------------------------------------------------------------------------------------------------------------------------------------------------------------------------------------------------------------------------------------------------------------------------------------------------------------------------------------------------------------------------------------------------------------------------------------------------------------------------------------------------------------------------------------------------------------------------------------------------------------------------------------------------------------------------------------------------------------------------------------------------------------------------------------------------------------------------------------------------------------------------------------------------------------------------------------------------------------------------------------------------------------------------------------------------------------------------------------------------------------------------------------------------------------------------------------------------------------------------------------------------------------------------------------------------------------------------------------------------------------------------------------------------------------------------------------------------------------------------------------------------------------------------------------------------------------------------------------------------------------------------------------------------------------------------------------------------------------------------------------------------------------------------------------------------------------------------------------------------------------------------------------------------------------------------------------------------------------------------------------------------------------------------------------------------------------------------------------------------------------------------------------------------------------------------------------------------------------------------------------------------------------------------------------------------------------------------------------------------------------------------------------------------------------------------------------------------------------------------------------------------------------------------------------------------------------------------------------------------------------------------------------------------------------------------------------------------------------------------------------------------------------------------------------------------------------------------------------------------------------------------------------------------------------------------------------------------------------------------------------------------------------------------------------------------------------------------------------------------------------------------------------------------------------------------------------------------------------------------------------------------------------------------------------------------------------------------------------------------------------------------------------------------------------------------------------------------------------------------------------------------------------------------------------------------------------------------------------------------------------------------------------------------------------------------------------------------------------------------------------------------------------------------------------------------------------------------------------------------------------------------------------------------------------------------------------------------------------------------------------------------------------------------------------------------------------------------------------------------------------------------------------------------------------------------------------------------------------------------------------------------------------------------------------------------------------------------------------------------------------------------------------------------------------------------------------------------------------------------------------------------------------------------------------------------------------------------------------------------------------------------------------------------------------------------------------------------------------------------------------------------------------------------------------------------------------------------------------------------------------------------------------------------------------------------------------------------------------------------------------------------------------------------------------------------------------------------------------------------------------------------------------------------------------------------------------------------------------------------------------------------------------------------------------------------------------------------------------------------------------------------------------------------------------------------------------------------------------------------------------------------------------------------------------------------------------------------------------------------------------------------------------------------------------------------------------------------------------------------------------------------------------------------------|

|  |  |  |  |  |                                                                                                                                                                                      |
|--|--|--|--|--|--------------------------------------------------------------------------------------------------------------------------------------------------------------------------------------|
|  |  |  |  |  | vo_n2_Locus_3954_Transcript_4/8_Confidence_0.435_Length_2452, vo_n1_Locus_561_Transcript_7/10_Confidence_0.385_Length_2182,<br>vo_c1_Locus_1055_Transcript_7/11_Confidence_0.357_Len |
|--|--|--|--|--|--------------------------------------------------------------------------------------------------------------------------------------------------------------------------------------|

|                       |          |    |                                                                                                                                                                                                                                                                                                                                                                                                                                                                                                                                                                                                                                                                                                                                                                                                                                                                                                                                                                                                                                                                                                                                                                                                                                                                                                                                                               |                                                                                                                                                                         |                                                                                                                                                                                                                                                                                                                                                                                                                                                                                                                                                                                                                                                                                                                                                                                                                                                                                                                                                                                                                                                                                                                                                                                                                                                                                                                                                                                                                                                                                                                                                                                                                                                                                                                                                                                                                                                                                                                                                                                                                                                                                                                                                                                                                                                                                                                                                                                                                                                                                                                                                                                                                                                                                                                                                                                                                                                                                                                                                                                                                                                                                                                                                                                                                                                                                                                                                                                                                                                                                                                                                                                                                                                                                                                                                                                                                                                                                                                                                                                                                                                                                                                                                                                                                                                                                                                                                                                                                                                                                                                                                                                                                                                                                                                                                                                                                                                                                                                                                                                                                                                                                                                                                                                                                                                                                                                                                                                                                                                                                                                                                                                                                                                                                                                                                                                                                                                                                                                                                                                                                                                                                                                                                                                                                                                                                                                                                                                                                                                                                                                                                                                                                                                                                                                                                                           |
|-----------------------|----------|----|---------------------------------------------------------------------------------------------------------------------------------------------------------------------------------------------------------------------------------------------------------------------------------------------------------------------------------------------------------------------------------------------------------------------------------------------------------------------------------------------------------------------------------------------------------------------------------------------------------------------------------------------------------------------------------------------------------------------------------------------------------------------------------------------------------------------------------------------------------------------------------------------------------------------------------------------------------------------------------------------------------------------------------------------------------------------------------------------------------------------------------------------------------------------------------------------------------------------------------------------------------------------------------------------------------------------------------------------------------------|-------------------------------------------------------------------------------------------------------------------------------------------------------------------------|---------------------------------------------------------------------------------------------------------------------------------------------------------------------------------------------------------------------------------------------------------------------------------------------------------------------------------------------------------------------------------------------------------------------------------------------------------------------------------------------------------------------------------------------------------------------------------------------------------------------------------------------------------------------------------------------------------------------------------------------------------------------------------------------------------------------------------------------------------------------------------------------------------------------------------------------------------------------------------------------------------------------------------------------------------------------------------------------------------------------------------------------------------------------------------------------------------------------------------------------------------------------------------------------------------------------------------------------------------------------------------------------------------------------------------------------------------------------------------------------------------------------------------------------------------------------------------------------------------------------------------------------------------------------------------------------------------------------------------------------------------------------------------------------------------------------------------------------------------------------------------------------------------------------------------------------------------------------------------------------------------------------------------------------------------------------------------------------------------------------------------------------------------------------------------------------------------------------------------------------------------------------------------------------------------------------------------------------------------------------------------------------------------------------------------------------------------------------------------------------------------------------------------------------------------------------------------------------------------------------------------------------------------------------------------------------------------------------------------------------------------------------------------------------------------------------------------------------------------------------------------------------------------------------------------------------------------------------------------------------------------------------------------------------------------------------------------------------------------------------------------------------------------------------------------------------------------------------------------------------------------------------------------------------------------------------------------------------------------------------------------------------------------------------------------------------------------------------------------------------------------------------------------------------------------------------------------------------------------------------------------------------------------------------------------------------------------------------------------------------------------------------------------------------------------------------------------------------------------------------------------------------------------------------------------------------------------------------------------------------------------------------------------------------------------------------------------------------------------------------------------------------------------------------------------------------------------------------------------------------------------------------------------------------------------------------------------------------------------------------------------------------------------------------------------------------------------------------------------------------------------------------------------------------------------------------------------------------------------------------------------------------------------------------------------------------------------------------------------------------------------------------------------------------------------------------------------------------------------------------------------------------------------------------------------------------------------------------------------------------------------------------------------------------------------------------------------------------------------------------------------------------------------------------------------------------------------------------------------------------------------------------------------------------------------------------------------------------------------------------------------------------------------------------------------------------------------------------------------------------------------------------------------------------------------------------------------------------------------------------------------------------------------------------------------------------------------------------------------------------------------------------------------------------------------------------------------------------------------------------------------------------------------------------------------------------------------------------------------------------------------------------------------------------------------------------------------------------------------------------------------------------------------------------------------------------------------------------------------------------------------------------------------------------------------------------------------------------------------------------------------------------------------------------------------------------------------------------------------------------------------------------------------------------------------------------------------------------------------------------------------------------------------------------------------------------------------------------------------------------------------------------------|
| Purine metabolis<br>m | map00230 | 49 | <p>ec:6.3.3.1 - cyclo-ligase, ec:2.7.4.8 - kinase, ec:2.7.4.6 - kinase, ec:2.7.4.3 - kinase, ec:3.5.2.5 - ec:3.5.2.5 allantoinase, ec:4.1.1.21 - carboxylase, ec:3.1.4.17 - phosphodiesterase, ec:3.5.4.4 - deaminase, ec:4.3.2.2 - lyase, ec:3.5.4.2 - deaminase, ec:3.5.4.3 - deaminase, ec:2.7.1.40 - kinase, ec:3.5.4.6 - deaminase, ec:3.1.4.35 - phosphodiesterase, ec:2.7.1.25 - kinase, ec:2.7.1.20 - kinase, ec:2.7.6.1 - diphosphokinase, ec:4.6.1.1 - cyclase, ec:4.6.1.2 - cyclase, ec:3.1.3.5 - uridine 5'-nucleotidase, ec:6.3.5.2 - synthase (glutamine-hydrolysing), ec:6.3.5.3 - synthase, ec:5.4.99.18 - ribonucleotide mutase, ec:3.5.1.5 - ec:3.5.1.5 urease, ec:2.1.2.3 - formyltransferase, ec:2.1.2.2 - formyltransferase, ec:6.3.4.4 - synthase, ec:3.6.1.3 - adenylypyrophosphatase, ec:3.6.1.6 - diphosphate phosphatase, ec:3.6.1.8 - diphosphatase, ec:3.6.1.9 - diphosphatase, ec:1.17.4.1 - reductase, ec:6.3.2.6 - synthase, ec:3.6.1.13 - diphosphatase, ec:3.6.1.15 - phosphatase, ec:2.7.7.4 - adenylyltransferase, ec:3.6.1.21 - diphosphatase, ec:3.6.1.29 - dinucleosidetriphosphatase, ec:2.7.7.6 - RNA polymerase, ec:2.7.7.7 - DNA polymerase, ec:6.3.4.13 - ligase, ec:3.5.2.17 - hydrolase, ec:3.2.2.1 - nucleosidase, ec:1.1.1.205 - dehydrogenase, ec:5.4.2.2 - (alpha-D-glucose-1,6-bisphosphate-dependent),</p> | <p>4, 2, 20, 10, 1, 1, 26, 1, 1, 1, 1, 25, 3, 28, 2, 3, 4, 6, 10, 11, 11, 4, 1, 1, 8, 1, 1, 334, 7, 1, 7, 32, 5, 3, 54, 7, 5, 1, 24, 30, 5, 2, 1, 12, 7, 1, 8, 1, 1</p> | <p>vo_c2_Locus_14099_Transcript_8/21_Confidence_0.413_Length_6648, vo_c1_Locus_1785_Transcript_2/4_Confidence_0.667_Length_6496, vo_c2_Locus_14099_Transcript_2/21_Confidence_0.444_Length_6577, vo_c3_Locus_4727_Transcript_17/25_Confidence_0.456_Length_6641, vo_n2_Locus_25289_Transcript_2/2_Confidence_0.000_Length_331, vo_c1_Locus_9429_Transcript_1/1_Confidence_0.000_Length_2416, vo_c1_Locus_13409_Transcript_2/6_Confidence_0.286_Length_871, vo_c3_Locus_2169_Transcript_1/3_Confidence_0.167_Length_848, vo_n2_Locus_739_Transcript_8/8_Confidence_0.167_Length_1338, vo_n3_Locus_4095_Transcript_2/3_Confidence_0.444_Length_3401, vo_c1_Locus_12423_Transcript_2/2_Confidence_0.333_Length_980, vo_c1_Locus_25242_Transcript_1/1_Confidence_0.000_Length_1465, vo_c1_Locus_4920_Transcript_1/2_Confidence_0.714_Length_1520, tri_c_comp49412_c0_seq1, vo_n2_Locus_5279_Transcript_1/1_Confidence_0.333_Length_2493, vo_n2_Locus_20723_Transcript_1/1_Confidence_0.000_Length_1179, vo_n3_Locus_24634_Transcript_1/1_Confidence_0.000_Length_445, vo_n1_Locus_5513_Transcript_4/4_Confidence_0.286_Length_1053, tri_c_comp24673_c0_seq1, tri_c_comp5012_c0_seq2, vo_c3_Locus_3080_Transcript_1/28_Confidence_0.009_Length_1584, vo_n1_Locus_9563_Transcript_1/1_Confidence_0.000_Length_1437, vo_n2_Locus_26604_Transcript_1/2_Confidence_0.750_Length_1361, vo_n2_Locus_2689_Transcript_2/2_Confidence_0.000_Length_2612, vo_c2_Locus_4541_Transcript_2/6_Confidence_0.571_Length_909, vo_n2_Locus_26604_Transcript_2/2_Confidence_0.000_Length_1685, vo_c2_Locus_10361_Transcript_6/7_Confidence_0.250_Length_1220, tri_c_comp24673_c0_seq1, vo_n1_Locus_2451_Transcript_1/3_Confidence_0.600_Length_2348, vo_c3_Locus_4102_Transcript_1/1_Confidence_0.000_Length_1034, vo_n2_Locus_22654_Transcript_1/1_Confidence_0.000_Length_691, vo_n1_Locus_2897_Transcript_2/14_Confidence_0.160_Length_971, vo_n2_Locus_14542_Transcript_1/3_Confidence_0.200_Length_924, vo_n3_Locus_12191_Transcript_1/1_Confidence_0.000_Length_1671, vo_n2_Locus_5279_Transcript_1/1_Confidence_0.333_Length_2493, vo_n3_Locus_24634_Transcript_1/1_Confidence_0.000_Length_445, vo_c1_Locus_16752_Transcript_1/1_Confidence_0.000_Length_1631, tri_c_comp23673_c0_seq1, vo_c1_Locus_11234_Transcript_1/1_Confidence_0.000_Length_3551, vo_n2_Locus_25869_Transcript_2/4_Confidence_0.667_Length_3997, vo_n3_Locus_2145_Transcript_70/88_Confidence_0.066_Length_3701, vo_c1_Locus_1289_Transcript_271/281_Confidence_0.010_Length_799, vo_n2_Locus_13038_Transcript_3/3_Confidence_0.000_Length_657, tri_n_comp20612_c0_seq41, tri_n_comp20612_c0_seq20, tri_c_comp41695_c0_seq1, vo_n2_Locus_8329_Transcript_2/4_Confidence_0.429_Length_5800, vo_n2_Locus_486_Transcript_5/19_Confidence_0.109_Length_1729, tri_n_comp20612_c0_seq23, vo_c1_Locus_1289_Transcript_276/281_Confidence_0.007_Length_682, vo_n1_Locus_2298_Transcript_8/8_Confidence_0.000_Length_405, vo_n2_Locus_17431_Transcript_1/1_Confidence_0.000_Length_3247, vo_n1_Locus_16872_Transcript_5/10_Confidence_0.467_Length_541, vo_c1_Locus_10943_Transcript_3/3_Confidence_0.167_Length_2079, tri_n_comp20612_c0_seq32, vo_c2_Locus_16226_Transcript_1/1_Confidence_0.500_Length_2623, vo_c3_Locus_71_Transcript_42/86_Confidence_0.049_Length_3035, vo_n2_Locus_16680_Transcript_1/2_Confidence_1.000_Length_1706, vo_c3_Locus_71_Transcript_44/86_Confidence_0.034_Length_2679, tri_n_comp20612_c0_seq19, vo_n3_Locus_14014_Transcript_3/7_Confidence_0.400_Length_1850, vo_c1_Locus_5298_Transcript_2/3_Confidence_0.400_Length_2630, vo_c2_Locus_28848_Transcript_1/1_Confidence_0.750_Length_2971, vo_n3_Locus_589_Transcript_1/1_Confidence_0.000_Length_2005, tri_n_comp92826_c0_seq1, vo_n2_Locus_9167_Transcript_1/4_Confidence_0.286_Length_6748, vo_n2_Locus_13025_Transcript_1/1_Confidence_0.000_Length_1235, tri_c_comp58344_c0_seq1, vo_n2_Locus_9037_Transcript_9/15_Confidence_0.486_Length_4553, vo_c2_Locus_684_Transcript_7/16_Confidence_0.194_Length_2803, vo_n3_Locus_2293_Transcript_1/2_Confidence_0.750_Length_1794, vo_n3_Locus_1756_Transcript_10/15_Confidence_0.393_Length_2226, vo_c3_Locus_725_Transcript_6/15_Confidence_0.548_Length_5086, vo_n3_Locus_1756_Transcript_7/15_Confidence_0.250_Length_2226, vo_n2_Locus_16147_Transcript_1/1_Confidence_0.000_Length_1452, vo_n2_Locus_9037_Transcript_2/15_Confidence_0.257_Length_3951, vo_n2_Locus_9037_Transcript_13/15_Confidence_0.143_Length_1729, vo_n2_Locus_9037_Transcript_5/15_Confidence_0.286_Length_2279, vo_n2_Locus_9037_Transcript_6/15_Confidence_0.229_Length_2279, tri_c_comp19644_c0_seq1, vo_n2_Locus_171_Transcript_17/42_Confidence_0.229_Length_1803, tri_c_comp19644_c0_seq4, vo_c3_Locus_12256_Transcript_3/3_Confidence_0.000_Length_508, vo_c3_Locus_725_Transcript_12/15_Confidence_0.290_Length_3194, vo_c1_Locus_6543_Transcript_5/23_Confidence_0.220_Length_2294, vo_n2_Locus_9037_Transcript_12/15_Confidence_0.257_Length_2318, vo_c3_Locus_725_Transcript_13/15_Confidence_0.452_Length_4249, tri_n_comp19211_c0_seq1, vo_c3_Locus_883_Transcript_1/2_Confidence_1.000_Length_1783, vo_n2_Locus_9037_Transcript_1/15_Confidence_0.143_Length_1677, vo_c3_Locus_307_Transcript_2/21_Confidence_0.576_Length_1809, vo_n1_Locus_41_Transcript_20/90_Confidence_0.068_Length_2175, vo_c2_Locus_1667_Transcript_21/21_Confidence_0.195_Length_1788, tri_c_comp80018_c0_seq1, vo_c1_Locus_37084_Transcript_1/2_Confidence_0.667_Length_2193, vo_c3_Locus_20892_Transcript_1/1_Confidence_0.000_Length_2501, vo_c1_Locus_11369_Transcript_2/3_Confidence_0.944_Length_3455, vo_c1_Locus_15657_Transcript_1/1_Confidence_0.000_Length_3265, vo_c3_Locus_8108_Transcript_1/1_Confidence_0.000_Length_1594, vo_n1_Locus_1533_Transcript_3/6_Confidence_0.167_Length_1394, vo_n2_Locus_3406_Transcript_3/4_Confidence_0.571_Length_827, vo_c2_Locus_17150_Transcript_26/102_Confidence_0.048_Length_1638, tri_n_comp50886_c0_seq1, tri_n_comp20612_c0_seq3, tri_c_comp38877_c0_seq1, vo_n1_Locus_2298_Transcript_3/8_Confidence_0.211_Length_3234, tri_n_comp20612_c0_seq5, tri_n_comp45457_c0_seq1, vo_n1_Locus_10882_Transcript_3/3_Confidence_0.200_Length_793, vo_n2_Locus_18247_Transcript_2/4_Confidence_0.333_Length_4047, vo_n1_Locus_3276_Transcript_1/2_Confidence_0.964_Length_3472, vo_n2_Locus_21555_Transcript_1/1_Confidence_0.000_Length_2269, vo_n2_Locus_1392_Transcript_1/1_Confidence_0.000_Length_3210, vo_n2_Locus_3406_Transcript_4/4_Confidence_0.286_Length_731, vo_n2_Locus_4835_Transcript_1/1_Confidence_0.000_Length_3087, vo_c2_Locus_18667_Transcript_1/2_Confidence_0.947_Length_3405, vo_n3_Locus_19488_Transcript_2/3_Confidence_0.958_Length_3497,</p> |
|-----------------------|----------|----|---------------------------------------------------------------------------------------------------------------------------------------------------------------------------------------------------------------------------------------------------------------------------------------------------------------------------------------------------------------------------------------------------------------------------------------------------------------------------------------------------------------------------------------------------------------------------------------------------------------------------------------------------------------------------------------------------------------------------------------------------------------------------------------------------------------------------------------------------------------------------------------------------------------------------------------------------------------------------------------------------------------------------------------------------------------------------------------------------------------------------------------------------------------------------------------------------------------------------------------------------------------------------------------------------------------------------------------------------------------|-------------------------------------------------------------------------------------------------------------------------------------------------------------------------|---------------------------------------------------------------------------------------------------------------------------------------------------------------------------------------------------------------------------------------------------------------------------------------------------------------------------------------------------------------------------------------------------------------------------------------------------------------------------------------------------------------------------------------------------------------------------------------------------------------------------------------------------------------------------------------------------------------------------------------------------------------------------------------------------------------------------------------------------------------------------------------------------------------------------------------------------------------------------------------------------------------------------------------------------------------------------------------------------------------------------------------------------------------------------------------------------------------------------------------------------------------------------------------------------------------------------------------------------------------------------------------------------------------------------------------------------------------------------------------------------------------------------------------------------------------------------------------------------------------------------------------------------------------------------------------------------------------------------------------------------------------------------------------------------------------------------------------------------------------------------------------------------------------------------------------------------------------------------------------------------------------------------------------------------------------------------------------------------------------------------------------------------------------------------------------------------------------------------------------------------------------------------------------------------------------------------------------------------------------------------------------------------------------------------------------------------------------------------------------------------------------------------------------------------------------------------------------------------------------------------------------------------------------------------------------------------------------------------------------------------------------------------------------------------------------------------------------------------------------------------------------------------------------------------------------------------------------------------------------------------------------------------------------------------------------------------------------------------------------------------------------------------------------------------------------------------------------------------------------------------------------------------------------------------------------------------------------------------------------------------------------------------------------------------------------------------------------------------------------------------------------------------------------------------------------------------------------------------------------------------------------------------------------------------------------------------------------------------------------------------------------------------------------------------------------------------------------------------------------------------------------------------------------------------------------------------------------------------------------------------------------------------------------------------------------------------------------------------------------------------------------------------------------------------------------------------------------------------------------------------------------------------------------------------------------------------------------------------------------------------------------------------------------------------------------------------------------------------------------------------------------------------------------------------------------------------------------------------------------------------------------------------------------------------------------------------------------------------------------------------------------------------------------------------------------------------------------------------------------------------------------------------------------------------------------------------------------------------------------------------------------------------------------------------------------------------------------------------------------------------------------------------------------------------------------------------------------------------------------------------------------------------------------------------------------------------------------------------------------------------------------------------------------------------------------------------------------------------------------------------------------------------------------------------------------------------------------------------------------------------------------------------------------------------------------------------------------------------------------------------------------------------------------------------------------------------------------------------------------------------------------------------------------------------------------------------------------------------------------------------------------------------------------------------------------------------------------------------------------------------------------------------------------------------------------------------------------------------------------------------------------------------------------------------------------------------------------------------------------------------------------------------------------------------------------------------------------------------------------------------------------------------------------------------------------------------------------------------------------------------------------------------------------------------------------------------------------------------------------------------------------------------|

|  |  |                                                                                                                                                       |                                                                                                                                                                                                                                                                                                                                                                                                                                                                                                                                                                                                                                                                                                                                                                                                                                                                                                                                                                                                                                                                                                                                                                                                                                                                                                                                                                                                                                                                                                                                                                                                                                                                                                                                                                                                                                                                                                                                                                                                                                                                                                                                                                                                                                                                                                                                                                                                                                                                                                                                                                                                                                                                                                                                                                                                                                                                                                                                                                                                                                                                                                                                                                                                                                                                                                                                                                                                                                                                                                                                                                                                                                                                                                                                                                                                                                                                                                                                                                                                                                                                                                                                                                                                                                                                                                                                                                                                                                                                                                                                                                                                                                                                                                                                                                                                                                                                                                                                                                                                                                                                                                                                                                                                                                                                                                                                                                                                                                                                                                                                                                                                                                                                                                                                                                                                                                                                                                                                                                                                                                                                                                                                                                                                                                                                                                                                                                                                                                                                                                                                                                                                                                                                                                                                                                                                                                                                                                                                 |
|--|--|-------------------------------------------------------------------------------------------------------------------------------------------------------|---------------------------------------------------------------------------------------------------------------------------------------------------------------------------------------------------------------------------------------------------------------------------------------------------------------------------------------------------------------------------------------------------------------------------------------------------------------------------------------------------------------------------------------------------------------------------------------------------------------------------------------------------------------------------------------------------------------------------------------------------------------------------------------------------------------------------------------------------------------------------------------------------------------------------------------------------------------------------------------------------------------------------------------------------------------------------------------------------------------------------------------------------------------------------------------------------------------------------------------------------------------------------------------------------------------------------------------------------------------------------------------------------------------------------------------------------------------------------------------------------------------------------------------------------------------------------------------------------------------------------------------------------------------------------------------------------------------------------------------------------------------------------------------------------------------------------------------------------------------------------------------------------------------------------------------------------------------------------------------------------------------------------------------------------------------------------------------------------------------------------------------------------------------------------------------------------------------------------------------------------------------------------------------------------------------------------------------------------------------------------------------------------------------------------------------------------------------------------------------------------------------------------------------------------------------------------------------------------------------------------------------------------------------------------------------------------------------------------------------------------------------------------------------------------------------------------------------------------------------------------------------------------------------------------------------------------------------------------------------------------------------------------------------------------------------------------------------------------------------------------------------------------------------------------------------------------------------------------------------------------------------------------------------------------------------------------------------------------------------------------------------------------------------------------------------------------------------------------------------------------------------------------------------------------------------------------------------------------------------------------------------------------------------------------------------------------------------------------------------------------------------------------------------------------------------------------------------------------------------------------------------------------------------------------------------------------------------------------------------------------------------------------------------------------------------------------------------------------------------------------------------------------------------------------------------------------------------------------------------------------------------------------------------------------------------------------------------------------------------------------------------------------------------------------------------------------------------------------------------------------------------------------------------------------------------------------------------------------------------------------------------------------------------------------------------------------------------------------------------------------------------------------------------------------------------------------------------------------------------------------------------------------------------------------------------------------------------------------------------------------------------------------------------------------------------------------------------------------------------------------------------------------------------------------------------------------------------------------------------------------------------------------------------------------------------------------------------------------------------------------------------------------------------------------------------------------------------------------------------------------------------------------------------------------------------------------------------------------------------------------------------------------------------------------------------------------------------------------------------------------------------------------------------------------------------------------------------------------------------------------------------------------------------------------------------------------------------------------------------------------------------------------------------------------------------------------------------------------------------------------------------------------------------------------------------------------------------------------------------------------------------------------------------------------------------------------------------------------------------------------------------------------------------------------------------------------------------------------------------------------------------------------------------------------------------------------------------------------------------------------------------------------------------------------------------------------------------------------------------------------------------------------------------------------------------------------------------------------------------------------------------------------------------------------------|
|  |  | <p>ec:5.4.2.7 - phosphodeoxyribomutase,<br/> ec:3.5.4.10 - cyclohydrolase,<br/> ec:2.4.2.7 - phosphoribosyltransferase,<br/> ec:2.7.4.10 - kinase</p> | <p>tri_c_comp20307_c0_seq9, vo_c3_Locus_8654_Transcript_8/9_Confidence_0.133_Length_2413, tri_c_comp20307_c0_seq3, vo_n1_Locus_2298_Transcript_1/8_Confidence_0.368_Length_3186, vo_c2_Locus_18670_Transcript_1/1_Confidence_0.000_Length_6956, vo_c2_Locus_4106_Transcript_3/4_Confidence_0.429_Length_3178, vo_c3_Locus_8439_Transcript_2/2_Confidence_0.000_Length_3521, vo_c1_Locus_18424_Transcript_2/2_Confidence_0.000_Length_956, vo_c1_Locus_18424_Transcript_1/2_Confidence_0.750_Length_906, vo_n3_Locus_1405_Transcript_3/5_Confidence_0.500_Length_2519, vo_c1_Locus_11931_Transcript_1/1_Confidence_0.000_Length_1187, vo_n3_Locus_1405_Transcript_2/5_Confidence_0.667_Length_2492, vo_c3_Locus_18398_Transcript_2/2_Confidence_0.000_Length_715, vo_n2_Locus_18825_Transcript_1/3_Confidence_0.500_Length_1632, tri_c_comp33638_c0_seq1, vo_n2_Locus_8943_Transcript_1/2_Confidence_0.750_Length_1351, vo_n2_Locus_22854_Transcript_4/5_Confidence_0.333_Length_897, vo_c3_Locus_12814_Transcript_1/1_Confidence_0.000_Length_3781, tri_n_comp43454_c0_seq1, vo_c3_Locus_18559_Transcript_2/5_Confidence_0.400_Length_3906, vo_n1_Locus_7807_Transcript_1/1_Confidence_0.000_Length_2655, tri_c_comp38249_c0_seq1, vo_c1_Locus_2643_Transcript_1/1_Confidence_0.000_Length_3649, tri_c_comp15408_c0_seq1, tri_n_comp18351_c0_seq4, vo_c1_Locus_2409_Transcript_4/7_Confidence_0.444_Length_1597, vo_c3_Locus_37877_Transcript_1/1_Confidence_0.000_Length_862, tri_c_comp21242_c0_seq12, vo_c1_Locus_1548_Transcript_3/4_Confidence_0.429_Length_6787, tri_n_comp83886_c0_seq1, vo_c1_Locus_14933_Transcript_2/4_Confidence_0.429_Length_4839, vo_c3_Locus_31_Transcript_59/79_Confidence_0.018_Length_4351, vo_c1_Locus_21072_Transcript_1/1_Confidence_0.000_Length_965, vo_c2_Locus_25862_Transcript_4/4_Confidence_0.000_Length_988, vo_c2_Locus_26482_Transcript_5/6_Confidence_0.286_Length_1654, vo_c2_Locus_26482_Transcript_4/6_Confidence_0.571_Length_1609, vo_n2_Locus_21191_Transcript_4/6_Confidence_0.300_Length_1691, vo_c1_Locus_18480_Transcript_2/2_Confidence_0.000_Length_1013, vo_c2_Locus_27118_Transcript_12/49_Confidence_0.025_Length_3122, vo_c2_Locus_6520_Transcript_5/15_Confidence_0.455_Length_1419, vo_c3_Locus_7168_Transcript_5/8_Confidence_0.538_Length_1343, vo_n1_Locus_7057_Transcript_3/15_Confidence_0.611_Length_1294, vo_n2_Locus_21191_Transcript_3/6_Confidence_0.500_Length_1646, vo_n1_Locus_9681_Transcript_4/11_Confidence_0.529_Length_1748, vo_n2_Locus_215_Transcript_14/28_Confidence_0.182_Length_1973, vo_n3_Locus_2366_Transcript_13/24_Confidence_0.236_Length_1948, vo_n1_Locus_9681_Transcript_6/11_Confidence_0.353_Length_1721, vo_n2_Locus_215_Transcript_12/28_Confidence_0.212_Length_2644, vo_n1_Locus_9681_Transcript_11/11_Confidence_0.000_Length_529, vo_n1_Locus_9681_Transcript_5/11_Confidence_0.529_Length_1790, vo_n2_Locus_215_Transcript_22/28_Confidence_0.197_Length_2480, vo_n2_Locus_215_Transcript_8/28_Confidence_0.227_Length_2670, vo_c1_Locus_1789_Transcript_29/32_Confidence_0.300_Length_3220, vo_n1_Locus_6239_Transcript_3/19_Confidence_0.425_Length_1997, vo_c3_Locus_7565_Transcript_10/13_Confidence_0.400_Length_4317, tri_c_comp16509_c0_seq1, vo_c3_Locus_7565_Transcript_1/13_Confidence_0.375_Length_4301, vo_n1_Locus_4052_Transcript_3/24_Confidence_0.524_Length_4370, tri_c_comp23673_c0_seq1, tri_c_comp36137_c0_seq1, vo_c1_Locus_1055_Transcript_9/11_Confidence_0.357_Length_2035, vo_n1_Locus_561_Transcript_9/10_Confidence_0.462_Length_2182, vo_n2_Locus_3954_Transcript_2/8_Confidence_0.478_Length_2452, vo_c3_Locus_289_Transcript_1/7_Confidence_0.381_Length_2114, vo_n2_Locus_3954_Transcript_4/8_Confidence_0.435_Length_2452, vo_n1_Locus_561_Transcript_7/10_Confidence_0.385_Length_2182, vo_c1_Locus_1055_Transcript_7/11_Confidence_0.357_Length_2063, vo_n1_Locus_561_Transcript_1/10_Confidence_0.615_Length_2142, vo_n2_Locus_3094_Transcript_1/1_Confidence_0.000_Length_2179, tri_n_comp32103_c0_seq1, vo_c1_Locus_31_Transcript_975/1155_Confidence_0.009_Length_2875, vo_n2_Locus_5517_Transcript_2/6_Confidence_0.500_Length_15215, vo_n3_Locus_3296_Transcript_2/3_Confidence_0.105_Length_2093, vo_n1_Locus_31401_Transcript_1/1_Confidence_0.000_Length_3290, vo_n2_Locus_3_Transcript_135/24291_Confidence_0.000_Length_1423, tri_c_comp22421_c0_seq1, vo_n2_Locus_25738_Transcript_1/2_Confidence_0.750_Length_2303, vo_n3_Locus_12111_Transcript_1/1_Confidence_0.000_Length_3744, vo_c2_Locus_555_Transcript_1/1_Confidence_0.500_Length_2228, vo_c3_Locus_5_Transcript_149/353_Confidence_0.048_Length_4156, vo_c3_Locus_5_Transcript_329/353_Confidence_0.010_Length_1383, vo_n3_Locus_4760_Transcript_4/5_Confidence_0.067_Length_1112, vo_c3_Locus_7645_Transcript_5/8_Confidence_0.526_Length_2659, vo_n3_Locus_427_Transcript_145/175_Confidence_0.110_Length_3547, vo_n3_Locus_81_Transcript_40/54_Confidence_0.354_Length_2989, tri_c_comp39238_c0_seq1, vo_c3_Locus_15013_Transcript_2/4_Confidence_0.800_Length_2706, vo_n1_Locus_19766_Transcript_2/4_Confidence_0.500_Length_3906, vo_n2_Locus_7964_Transcript_6/11_Confidence_0.650_Length_3693, vo_n2_Locus_3_Transcript_6590/24291_Confidence_0.000_Length_2496, tri_n_comp19803_c0_seq4, tri_n_comp20613_c0_seq2, vo_c2_Locus_3932_Transcript_1/1_Confidence_0.000_Length_1456, vo_n2_Locus_88_Transcript_3/3_Confidence_0.250_Length_876, vo_n3_Locus_81_Transcript_8/54_Confidence_0.415_Length_3794, vo_n3_Locus_11156_Transcript_9/11_Confidence_0.500_Length_6082, vo_c1_Locus_4849_Transcript_14/16_Confidence_0.259_Length_2445, vo_c1_Locus_8562_Transcript_1/1_Confidence_0.000_Length_2414, vo_c1_Locus_5480_Transcript_2/9_Confidence_0.312_Length_693, vo_c2_Locus_579_Transcript_160/548_Confidence_0.016_Length_1203, vo_n3_Locus_7390_Transcript_2/3_Confidence_0.400_Length_4559, vo_n3_Locus_87_Transcript_4/8_Confidence_0.400_Length_2639, vo_n2_Locus_3_Transcript_20035/24291_Confidence_0.000_Length_2188, tri_c_comp27724_c0_seq1, vo_n2_Locus_3_Transcript_6586/24291_Confidence_0.000_Length_257, vo_n2_Locus_3_Transcript_20537/24291_Confidence_0.000_Length_3437, vo_n3_Locus_427_Transcript_118/175_Confidence_0.158_Length_3483, vo_c3_Locus_5_Transcript_27/353_Confidence_0.024_Length_1533, vo_c1_Locus_247_Transcript_53/92_Confidence_0.147_Length_2668, vo_n2_Locus_3_Transcript_20499/24291_Confidence_0.000_Length_5167, tri_n_comp20573_c1_seq9, tri_n_comp20573_c1_seq7, vo_n3_Locus_23289_Transcript_1/5_Confidence_0.429_Length_3154, tri_n_comp20573_c1_seq5, vo_c1_Locus_4_Transcript_358/366_Confidence_0.039_Length_986, vo_n3_Locus_427_Transcript_113/175_Confidence_0.081_Length_2714, tri_c_comp75769_c0_seq1, vo_c1_Locus_1558_Transcript_10/10_Confidence_0.225_Length_6627, vo_n2_Locus_3_Transcript_894/24291_Confidence_0.000_Length_542,</p> |
|--|--|-------------------------------------------------------------------------------------------------------------------------------------------------------|---------------------------------------------------------------------------------------------------------------------------------------------------------------------------------------------------------------------------------------------------------------------------------------------------------------------------------------------------------------------------------------------------------------------------------------------------------------------------------------------------------------------------------------------------------------------------------------------------------------------------------------------------------------------------------------------------------------------------------------------------------------------------------------------------------------------------------------------------------------------------------------------------------------------------------------------------------------------------------------------------------------------------------------------------------------------------------------------------------------------------------------------------------------------------------------------------------------------------------------------------------------------------------------------------------------------------------------------------------------------------------------------------------------------------------------------------------------------------------------------------------------------------------------------------------------------------------------------------------------------------------------------------------------------------------------------------------------------------------------------------------------------------------------------------------------------------------------------------------------------------------------------------------------------------------------------------------------------------------------------------------------------------------------------------------------------------------------------------------------------------------------------------------------------------------------------------------------------------------------------------------------------------------------------------------------------------------------------------------------------------------------------------------------------------------------------------------------------------------------------------------------------------------------------------------------------------------------------------------------------------------------------------------------------------------------------------------------------------------------------------------------------------------------------------------------------------------------------------------------------------------------------------------------------------------------------------------------------------------------------------------------------------------------------------------------------------------------------------------------------------------------------------------------------------------------------------------------------------------------------------------------------------------------------------------------------------------------------------------------------------------------------------------------------------------------------------------------------------------------------------------------------------------------------------------------------------------------------------------------------------------------------------------------------------------------------------------------------------------------------------------------------------------------------------------------------------------------------------------------------------------------------------------------------------------------------------------------------------------------------------------------------------------------------------------------------------------------------------------------------------------------------------------------------------------------------------------------------------------------------------------------------------------------------------------------------------------------------------------------------------------------------------------------------------------------------------------------------------------------------------------------------------------------------------------------------------------------------------------------------------------------------------------------------------------------------------------------------------------------------------------------------------------------------------------------------------------------------------------------------------------------------------------------------------------------------------------------------------------------------------------------------------------------------------------------------------------------------------------------------------------------------------------------------------------------------------------------------------------------------------------------------------------------------------------------------------------------------------------------------------------------------------------------------------------------------------------------------------------------------------------------------------------------------------------------------------------------------------------------------------------------------------------------------------------------------------------------------------------------------------------------------------------------------------------------------------------------------------------------------------------------------------------------------------------------------------------------------------------------------------------------------------------------------------------------------------------------------------------------------------------------------------------------------------------------------------------------------------------------------------------------------------------------------------------------------------------------------------------------------------------------------------------------------------------------------------------------------------------------------------------------------------------------------------------------------------------------------------------------------------------------------------------------------------------------------------------------------------------------------------------------------------------------------------------------------------------------------------------------------------------------------------------------------------------|

|  |  |  |  |                                                                                                                                                                                                                                                                                                                                                                                                                                                                                                                                                                                                                                                                                                                                                                                                                                                                                                                                                                                                                                                                                                                                                                                                                                                                                                                                                                                                                                                                                                                                                                                                                                                                                                                                                                                                                                                                                                                                                                                                                                                                                                                                                                                                                                                                                                                                                                                                                                                                                                                                                                                                                                                                                                                                                                                                                                                                                                                                                                                                                                                                                                                                                                                                                                                                                                                                                                                                                                                                                                                                                                                                                                                                                                                                                                                                                                                                                                                                                                                                                                                                                                                                                                                                                                                                                                                                                                                                                                                                                                                                                                                                                                                                                                                                                                                                                                                                                                                                                                                                                                                                                                                                                                                                                                                                                                                                                                                                                                                                                                                                                                                                                                                                                                                                                                                                                                                                                                                                                                                                                                                                                                                                                                                                                                                                                                                                                                                                                                                                                                                                                                                                                                                                                                                                                                                                                                                               |
|--|--|--|--|---------------------------------------------------------------------------------------------------------------------------------------------------------------------------------------------------------------------------------------------------------------------------------------------------------------------------------------------------------------------------------------------------------------------------------------------------------------------------------------------------------------------------------------------------------------------------------------------------------------------------------------------------------------------------------------------------------------------------------------------------------------------------------------------------------------------------------------------------------------------------------------------------------------------------------------------------------------------------------------------------------------------------------------------------------------------------------------------------------------------------------------------------------------------------------------------------------------------------------------------------------------------------------------------------------------------------------------------------------------------------------------------------------------------------------------------------------------------------------------------------------------------------------------------------------------------------------------------------------------------------------------------------------------------------------------------------------------------------------------------------------------------------------------------------------------------------------------------------------------------------------------------------------------------------------------------------------------------------------------------------------------------------------------------------------------------------------------------------------------------------------------------------------------------------------------------------------------------------------------------------------------------------------------------------------------------------------------------------------------------------------------------------------------------------------------------------------------------------------------------------------------------------------------------------------------------------------------------------------------------------------------------------------------------------------------------------------------------------------------------------------------------------------------------------------------------------------------------------------------------------------------------------------------------------------------------------------------------------------------------------------------------------------------------------------------------------------------------------------------------------------------------------------------------------------------------------------------------------------------------------------------------------------------------------------------------------------------------------------------------------------------------------------------------------------------------------------------------------------------------------------------------------------------------------------------------------------------------------------------------------------------------------------------------------------------------------------------------------------------------------------------------------------------------------------------------------------------------------------------------------------------------------------------------------------------------------------------------------------------------------------------------------------------------------------------------------------------------------------------------------------------------------------------------------------------------------------------------------------------------------------------------------------------------------------------------------------------------------------------------------------------------------------------------------------------------------------------------------------------------------------------------------------------------------------------------------------------------------------------------------------------------------------------------------------------------------------------------------------------------------------------------------------------------------------------------------------------------------------------------------------------------------------------------------------------------------------------------------------------------------------------------------------------------------------------------------------------------------------------------------------------------------------------------------------------------------------------------------------------------------------------------------------------------------------------------------------------------------------------------------------------------------------------------------------------------------------------------------------------------------------------------------------------------------------------------------------------------------------------------------------------------------------------------------------------------------------------------------------------------------------------------------------------------------------------------------------------------------------------------------------------------------------------------------------------------------------------------------------------------------------------------------------------------------------------------------------------------------------------------------------------------------------------------------------------------------------------------------------------------------------------------------------------------------------------------------------------------------------------------------------------------------------------------------------------------------------------------------------------------------------------------------------------------------------------------------------------------------------------------------------------------------------------------------------------------------------------------------------------------------------------------------------------------------------------------------------------------------------------|
|  |  |  |  | <p>tri_n_comp47775_c0_seq1, vo_n2_Locus_2545_Transcript_2/2_Confidence_0.000_Length_3134, vo_c3_Locus_32274_Transcript_3/4_Confidence_0.333_Length_1761, vo_n1_Locus_68_Transcript_33/39_Confidence_0.217_Length_1672, vo_c1_Locus_31_Transcript_986/1155_Confidence_0.003_Length_1716, vo_n2_Locus_3_Transcript_6579/24291_Confidence_0.000_Length_1740, vo_c2_Locus_52_Transcript_314/466_Confidence_0.012_Length_1560, vo_n2_Locus_2078_Transcript_1/1_Confidence_0.000_Length_2771, tri_c_comp20681_c1_seq2, vo_n1_Locus_7216_Transcript_3/5_Confidence_0.410_Length_13054, vo_n2_Locus_3423_Transcript_2/10_Confidence_0.667_Length_2090, tri_n_comp23721_c0_seq1, vo_n2_Locus_14944_Transcript_3/6_Confidence_0.625_Length_1989, tri_n_comp61222_c0_seq1, vo_c3_Locus_1299_Transcript_4/15_Confidence_0.556_Length_2256, vo_c1_Locus_18050_Transcript_18/18_Confidence_0.000_Length_2637, vo_c3_Locus_16970_Transcript_1/1_Confidence_0.000_Length_1358, vo_n2_Locus_25592_Transcript_1/2_Confidence_0.333_Length_931, vo_n2_Locus_3_Transcript_6490/24291_Confidence_0.000_Length_1110, tri_c_comp2918_c0_seq1, vo_c3_Locus_7131_Transcript_3/18_Confidence_0.333_Length_7767, tri_c_comp62474_c0_seq1, vo_c1_Locus_2349_Transcript_14/17_Confidence_0.588_Length_4132, vo_n2_Locus_3_Transcript_198/24291_Confidence_0.000_Length_734, vo_c3_Locus_2745_Transcript_3/8_Confidence_0.545_Length_2262, vo_n2_Locus_3_Transcript_2146/24291_Confidence_0.000_Length_8136, vo_c2_Locus_16170_Transcript_2/2_Confidence_0.000_Length_417, vo_n2_Locus_336_Transcript_5/9_Confidence_0.318_Length_1829, vo_c2_Locus_579_Transcript_125/548_Confidence_0.024_Length_1059, vo_n1_Locus_1858_Transcript_419/440_Confidence_0.022_Length_537, vo_c2_Locus_1543_Transcript_18/29_Confidence_0.425_Length_3326, vo_c2_Locus_1543_Transcript_26/29_Confidence_0.575_Length_3718, vo_c1_Locus_9448_Transcript_1/1_Confidence_0.000_Length_1462, vo_n1_Locus_7662_Transcript_1/2_Confidence_0.967_Length_3451, vo_n2_Locus_7754_Transcript_1/3_Confidence_0.167_Length_1808, vo_c1_Locus_31_Transcript_974/1155_Confidence_0.009_Length_2112, vo_n1_Locus_16407_Transcript_1/11_Confidence_0.400_Length_2360, tri_n_comp20616_c0_seq4, vo_c2_Locus_3834_Transcript_23/50_Confidence_0.062_Length_3121, vo_n1_Locus_68_Transcript_34/39_Confidence_0.075_Length_2855, vo_n1_Locus_16_Transcript_107/225_Confidence_0.016_Length_2544, vo_c3_Locus_7216_Transcript_3/5_Confidence_0.333_Length_2942, vo_n1_Locus_586_Transcript_15/171_Confidence_0.017_Length_4099, vo_n2_Locus_3_Transcript_6527/24291_Confidence_0.000_Length_14582, tri_c_comp43067_c0_seq1, vo_c1_Locus_26083_Transcript_4/7_Confidence_0.545_Length_2333, vo_c3_Locus_17678_Transcript_1/2_Confidence_0.667_Length_1546, vo_n2_Locus_3_Transcript_195/24291_Confidence_0.000_Length_447, tri_c_comp6033_c0_seq1, vo_n2_Locus_15403_Transcript_1/2_Confidence_0.667_Length_1439, tri_n_comp12113_c0_seq1, vo_n1_Locus_693_Transcript_1/16_Confidence_0.200_Length_1520, vo_c3_Locus_11591_Transcript_2/3_Confidence_0.571_Length_11254, vo_c2_Locus_10236_Transcript_3/20_Confidence_0.150_Length_1941, vo_n2_Locus_3_Transcript_280/24291_Confidence_0.000_Length_1356, vo_c3_Locus_1766_Transcript_1/1_Confidence_0.000_Length_1152, vo_n1_Locus_1055_Transcript_1/31_Confidence_0.419_Length_3579, vo_c3_Locus_13234_Transcript_1/4_Confidence_0.600_Length_4487, vo_c1_Locus_4_Transcript_269/366_Confidence_0.017_Length_689, vo_n1_Locus_1858_Transcript_417/440_Confidence_0.011_Length_549, vo_c3_Locus_5_Transcript_311/353_Confidence_0.038_Length_3204, vo_n1_Locus_3_Transcript_42/53_Confidence_0.250_Length_15193, vo_c1_Locus_44080_Transcript_1/1_Confidence_0.500_Length_170, vo_c2_Locus_947_Transcript_3/5_Confidence_0.667_Length_3262, vo_c2_Locus_13950_Transcript_1/1_Confidence_0.500_Length_2942, vo_c3_Locus_363_Transcript_3/24_Confidence_0.238_Length_3160, vo_n1_Locus_6445_Transcript_1/17_Confidence_0.143_Length_1951, vo_c3_Locus_33664_Transcript_2/2_Confidence_0.000_Length_2232, vo_n1_Locus_7700_Transcript_1/1_Confidence_0.000_Length_2536, tri_n_comp37528_c0_seq1, vo_n3_Locus_81_Transcript_42/54_Confidence_0.245_Length_2948, vo_c2_Locus_52_Transcript_346/466_Confidence_0.005_Length_2463, vo_n2_Locus_3_Transcript_6537/24291_Confidence_0.000_Length_2637, tri_n_comp20775_c0_seq2, tri_n_comp94388_c0_seq1, vo_c2_Locus_5794_Transcript_2/2_Confidence_0.000_Length_2377, tri_n_comp20775_c0_seq8, vo_c2_Locus_52_Transcript_305/466_Confidence_0.047_Length_2671, vo_c1_Locus_31_Transcript_981/1155_Confidence_0.012_Length_2636, vo_c2_Locus_1956_Transcript_2/3_Confidence_0.200_Length_861, vo_n3_Locus_81_Transcript_15/54_Confidence_0.340_Length_3575, vo_n1_Locus_429_Transcript_17/19_Confidence_0.483_Length_2215, vo_n2_Locus_3_Transcript_6543/24291_Confidence_0.000_Length_3424, vo_c3_Locus_3164_Transcript_96/111_Confidence_0.009_Length_11338, vo_n2_Locus_10873_Transcript_1/2_Confidence_0.333_Length_1429, vo_n2_Locus_3748_Transcript_2/7_Confidence_0.500_Length_14045, vo_n3_Locus_427_Transcript_117/175_Confidence_0.093_Length_2715, vo_c1_Locus_247_Transcript_67/92_Confidence_0.147_Length_2373, vo_n1_Locus_21852_Transcript_2/2_Confidence_0.167_Length_2557, tri_n_comp14883_c0_seq1, tri_n_comp18105_c0_seq3, vo_c1_Locus_4_Transcript_289/366_Confidence_0.028_Length_1095, vo_c1_Locus_31_Transcript_949/1155_Confidence_0.002_Length_2152, vo_c3_Locus_5_Transcript_126/353_Confidence_0.019_Length_4217, tri_c_comp38221_c0_seq1, vo_c3_Locus_24981_Transcript_15/16_Confidence_0.015_Length_2313, vo_n1_Locus_7307_Transcript_14/44_Confidence_0.145_Length_1234, vo_c3_Locus_1323_Transcript_7/23_Confidence_0.455_Length_3889, vo_c3_Locus_30043_Transcript_1/3_Confidence_0.444_Length_2397, vo_c3_Locus_4508_Transcript_1/7_Confidence_0.438_Length_2333, vo_c1_Locus_5803_Transcript_20/21_Confidence_0.417_Length_2594, vo_n1_Locus_5525_Transcript_6/11_Confidence_0.133_Length_4294, tri_c_comp41265_c0_seq1, vo_n2_Locus_14056_Transcript_2/3_Confidence_0.333_Length_2513, vo_c1_Locus_4993_Transcript_4/4_Confidence_0.143_Length_5162, vo_n3_Locus_427_Transcript_54/175_Confidence_0.090_Length_2679, vo_n3_Locus_81_Transcript_41/54_Confidence_0.320_Length_3232, vo_n2_Locus_17878_Transcript_2/2_Confidence_0.800_Length_3026, vo_n1_Locus_2635_Transcript_18/21_Confidence_0.156_Length_2310, vo_c2_Locus_1611_Transcript_19/22_Confidence_0.057_Length_1197, vo_n2_Locus_3_Transcript_6536/24291_Confidence_0.000_Length_2542, vo_c2_Locus_37_Transcript_72/305_Confidence_0.025_Length_3316, vo_n1_Locus_16_Transcript_57/225_Confidence_0.055_Length_2636, tri_c_comp18389_c0_seq7, vo_c2_Locus_52_Transcript_300/466_Confidence_0.033_Length_2317, tri_c_comp18389_c0_seq2,</p> |
|--|--|--|--|---------------------------------------------------------------------------------------------------------------------------------------------------------------------------------------------------------------------------------------------------------------------------------------------------------------------------------------------------------------------------------------------------------------------------------------------------------------------------------------------------------------------------------------------------------------------------------------------------------------------------------------------------------------------------------------------------------------------------------------------------------------------------------------------------------------------------------------------------------------------------------------------------------------------------------------------------------------------------------------------------------------------------------------------------------------------------------------------------------------------------------------------------------------------------------------------------------------------------------------------------------------------------------------------------------------------------------------------------------------------------------------------------------------------------------------------------------------------------------------------------------------------------------------------------------------------------------------------------------------------------------------------------------------------------------------------------------------------------------------------------------------------------------------------------------------------------------------------------------------------------------------------------------------------------------------------------------------------------------------------------------------------------------------------------------------------------------------------------------------------------------------------------------------------------------------------------------------------------------------------------------------------------------------------------------------------------------------------------------------------------------------------------------------------------------------------------------------------------------------------------------------------------------------------------------------------------------------------------------------------------------------------------------------------------------------------------------------------------------------------------------------------------------------------------------------------------------------------------------------------------------------------------------------------------------------------------------------------------------------------------------------------------------------------------------------------------------------------------------------------------------------------------------------------------------------------------------------------------------------------------------------------------------------------------------------------------------------------------------------------------------------------------------------------------------------------------------------------------------------------------------------------------------------------------------------------------------------------------------------------------------------------------------------------------------------------------------------------------------------------------------------------------------------------------------------------------------------------------------------------------------------------------------------------------------------------------------------------------------------------------------------------------------------------------------------------------------------------------------------------------------------------------------------------------------------------------------------------------------------------------------------------------------------------------------------------------------------------------------------------------------------------------------------------------------------------------------------------------------------------------------------------------------------------------------------------------------------------------------------------------------------------------------------------------------------------------------------------------------------------------------------------------------------------------------------------------------------------------------------------------------------------------------------------------------------------------------------------------------------------------------------------------------------------------------------------------------------------------------------------------------------------------------------------------------------------------------------------------------------------------------------------------------------------------------------------------------------------------------------------------------------------------------------------------------------------------------------------------------------------------------------------------------------------------------------------------------------------------------------------------------------------------------------------------------------------------------------------------------------------------------------------------------------------------------------------------------------------------------------------------------------------------------------------------------------------------------------------------------------------------------------------------------------------------------------------------------------------------------------------------------------------------------------------------------------------------------------------------------------------------------------------------------------------------------------------------------------------------------------------------------------------------------------------------------------------------------------------------------------------------------------------------------------------------------------------------------------------------------------------------------------------------------------------------------------------------------------------------------------------------------------------------------------------------------------------------------------------------------------|

|  |  |  |  |                                                                                                                                                                                                                                                                                                                                                                                                                                                                                                                                                                                                                                                                                                                                                                                                                                                                                                                                                                                                                                                                                                                                                                                                                                                                                                                                                                                                                                                                                                                                                                                                                                                                                                                                                                                                                                                                                                                                                                                                                                                                                                                                                                                                                                                                                                                                                                                                                                                                                                                                                                                                                                                                                                                                                                                                                                                                                                                                                                                                                                                                                                                                                                                                                                                                                                                                                                                                                                                                                                                                                                                                                                                                                                                                                                                                                                                                                                                                                                                                                                                                                                                                                                                                                                                                                                                                                                                                                                                                                                                                                                                                                                                                                                                                                                                                                                                                                                                                                                                                                                                                                                                                                                                                                                                                                                                                                                                                                                                                                                                                                                                                                                                                                                                                                                                                                                                                                                                                                                                                                                                                                                                                                                                                                                                                                                                                                                                                                                                                                                                                                                                                                                                                                                                                                                                                                                                                   |
|--|--|--|--|-------------------------------------------------------------------------------------------------------------------------------------------------------------------------------------------------------------------------------------------------------------------------------------------------------------------------------------------------------------------------------------------------------------------------------------------------------------------------------------------------------------------------------------------------------------------------------------------------------------------------------------------------------------------------------------------------------------------------------------------------------------------------------------------------------------------------------------------------------------------------------------------------------------------------------------------------------------------------------------------------------------------------------------------------------------------------------------------------------------------------------------------------------------------------------------------------------------------------------------------------------------------------------------------------------------------------------------------------------------------------------------------------------------------------------------------------------------------------------------------------------------------------------------------------------------------------------------------------------------------------------------------------------------------------------------------------------------------------------------------------------------------------------------------------------------------------------------------------------------------------------------------------------------------------------------------------------------------------------------------------------------------------------------------------------------------------------------------------------------------------------------------------------------------------------------------------------------------------------------------------------------------------------------------------------------------------------------------------------------------------------------------------------------------------------------------------------------------------------------------------------------------------------------------------------------------------------------------------------------------------------------------------------------------------------------------------------------------------------------------------------------------------------------------------------------------------------------------------------------------------------------------------------------------------------------------------------------------------------------------------------------------------------------------------------------------------------------------------------------------------------------------------------------------------------------------------------------------------------------------------------------------------------------------------------------------------------------------------------------------------------------------------------------------------------------------------------------------------------------------------------------------------------------------------------------------------------------------------------------------------------------------------------------------------------------------------------------------------------------------------------------------------------------------------------------------------------------------------------------------------------------------------------------------------------------------------------------------------------------------------------------------------------------------------------------------------------------------------------------------------------------------------------------------------------------------------------------------------------------------------------------------------------------------------------------------------------------------------------------------------------------------------------------------------------------------------------------------------------------------------------------------------------------------------------------------------------------------------------------------------------------------------------------------------------------------------------------------------------------------------------------------------------------------------------------------------------------------------------------------------------------------------------------------------------------------------------------------------------------------------------------------------------------------------------------------------------------------------------------------------------------------------------------------------------------------------------------------------------------------------------------------------------------------------------------------------------------------------------------------------------------------------------------------------------------------------------------------------------------------------------------------------------------------------------------------------------------------------------------------------------------------------------------------------------------------------------------------------------------------------------------------------------------------------------------------------------------------------------------------------------------------------------------------------------------------------------------------------------------------------------------------------------------------------------------------------------------------------------------------------------------------------------------------------------------------------------------------------------------------------------------------------------------------------------------------------------------------------------------------------------------------------------------------------------------------------------------------------------------------------------------------------------------------------------------------------------------------------------------------------------------------------------------------------------------------------------------------------------------------------------------------------------------------------------------------------------------------------------------------|
|  |  |  |  | <p>vo_c2_Locus_579_Transcript_123/548_Confidence_0.012_Length_999, vo_n2_Locus_6563_Transcript_1/1_Confidence_0.000_Length_2370, vo_c2_Locus_37_Transcript_51/305_Confidence_0.012_Length_2747, tri_n_comp64176_c0_seq1, tri_n_comp46870_c0_seq1, vo_c2_Locus_52_Transcript_309/466_Confidence_0.036_Length_2654, vo_n1_Locus_782_Transcript_2/2_Confidence_0.000_Length_2820, tri_c_comp55454_c0_seq1, vo_c2_Locus_4906_Transcript_1/6_Confidence_0.320_Length_10739, vo_n1_Locus_13939_Transcript_2/2_Confidence_0.000_Length_2279, tri_n_comp52479_c0_seq1, vo_n1_Locus_1404_Transcript_8/51_Confidence_0.273_Length_9488, vo_c2_Locus_579_Transcript_203/548_Confidence_0.006_Length_4691, vo_c1_Locus_13654_Transcript_2/4_Confidence_0.846_Length_2821, vo_c3_Locus_363_Transcript_22/24_Confidence_0.095_Length_1049, vo_c2_Locus_21966_Transcript_2/3_Confidence_0.333_Length_4811, vo_c3_Locus_5_Transcript_118/353_Confidence_0.045_Length_3310, vo_n2_Locus_3748_Transcript_1/7_Confidence_0.500_Length_14018, vo_c1_Locus_4_Transcript_278/366_Confidence_0.036_Length_1569, vo_c3_Locus_150_Transcript_4/4_Confidence_0.429_Length_2271, tri_n_comp46298_c0_seq1, vo_n1_Locus_68_Transcript_10/39_Confidence_0.325_Length_2921, vo_n3_Locus_11413_Transcript_1/1_Confidence_0.000_Length_2938, vo_c3_Locus_5_Transcript_140/353_Confidence_0.035_Length_3043, vo_c3_Locus_7131_Transcript_13/18_Confidence_0.500_Length_1394, vo_n2_Locus_3_Transcript_6585/24291_Confidence_0.001_Length_4455, vo_n1_Locus_14212_Transcript_1/3_Confidence_0.750_Length_12890, vo_n2_Locus_14045_Transcript_1/1_Confidence_0.000_Length_2252, vo_c3_Locus_5_Transcript_308/353_Confidence_0.047_Length_3138, vo_c2_Locus_1787_Transcript_5/9_Confidence_0.450_Length_3889, vo_n3_Locus_8653_Transcript_4/4_Confidence_0.125_Length_2635, vo_n2_Locus_8606_Transcript_2/2_Confidence_0.333_Length_4357, vo_c3_Locus_5_Transcript_120/353_Confidence_0.032_Length_2041, vo_n1_Locus_3552_Transcript_1/1_Confidence_0.000_Length_2088, vo_n3_Locus_4760_Transcript_3/5_Confidence_0.778_Length_2904, vo_n2_Locus_1515_Transcript_18/24_Confidence_0.026_Length_2573, vo_c2_Locus_9860_Transcript_3/3_Confidence_0.167_Length_3453, vo_n1_Locus_68_Transcript_25/39_Confidence_0.283_Length_2926, vo_n1_Locus_26316_Transcript_1/1_Confidence_0.000_Length_4173, vo_c1_Locus_19255_Transcript_1/1_Confidence_0.000_Length_7213, tri_c_comp24491_c0_seq1, vo_c1_Locus_25755_Transcript_1/1_Confidence_0.000_Length_1907, vo_c3_Locus_5_Transcript_153/353_Confidence_0.018_Length_3233, vo_n2_Locus_986_Transcript_4/33_Confidence_0.366_Length_2850, vo_n1_Locus_6445_Transcript_16/17_Confidence_0.114_Length_1048, vo_c3_Locus_6617_Transcript_2/3_Confidence_0.400_Length_2184, vo_n2_Locus_3_Transcript_20530/24291_Confidence_0.000_Length_3785, tri_n_comp6725_c0_seq1, vo_c1_Locus_26083_Transcript_7/7_Confidence_0.000_Length_484, vo_n1_Locus_34601_Transcript_1/1_Confidence_0.000_Length_2147, vo_c2_Locus_17150_Transcript_4/102_Confidence_0.039_Length_466, vo_n1_Locus_68_Transcript_13/39_Confidence_0.300_Length_2992, tri_n_comp51573_c0_seq1, vo_c3_Locus_713_Transcript_6/49_Confidence_0.139_Length_4520, vo_n3_Locus_427_Transcript_114/175_Confidence_0.081_Length_2387, vo_c2_Locus_5066_Transcript_1/2_Confidence_0.968_Length_2042, vo_c2_Locus_324_Transcript_11/12_Confidence_0.333_Length_4393, vo_c2_Locus_52_Transcript_310/466_Confidence_0.036_Length_2651, vo_n3_Locus_427_Transcript_136/175_Confidence_0.027_Length_886, vo_c2_Locus_579_Transcript_120/548_Confidence_0.013_Length_902, vo_c3_Locus_1299_Transcript_7/15_Confidence_0.444_Length_2262, vo_n1_Locus_4600_Transcript_4/22_Confidence_0.250_Length_5922, tri_n_comp5665_c0_seq1, vo_c1_Locus_4849_Transcript_10/16_Confidence_0.556_Length_2123, vo_c2_Locus_52_Transcript_336/466_Confidence_0.005_Length_4799, vo_n1_Locus_37234_Transcript_1/3_Confidence_1.000_Length_627, vo_n3_Locus_4760_Transcript_2/5_Confidence_0.044_Length_2212, tri_c_comp20278_c1_seq8, vo_c2_Locus_5809_Transcript_2/2_Confidence_0.250_Length_1859, vo_n1_Locus_869_Transcript_7/10_Confidence_0.605_Length_13092, vo_n3_Locus_18313_Transcript_1/1_Confidence_0.000_Length_1710, vo_n2_Locus_23536_Transcript_1/1_Confidence_0.000_Length_1634, vo_c2_Locus_579_Transcript_216/548_Confidence_0.006_Length_7997, vo_n3_Locus_81_Transcript_51/54_Confidence_0.197_Length_2262, tri_n_comp46526_c0_seq1, vo_c2_Locus_52_Transcript_318/466_Confidence_0.005_Length_3440, vo_n2_Locus_3_Transcript_20542/24291_Confidence_0.000_Length_3884, vo_n2_Locus_5350_Transcript_5/6_Confidence_0.375_Length_3890, vo_c2_Locus_40983_Transcript_3/3_Confidence_0.467_Length_271, vo_n2_Locus_25738_Transcript_2/2_Confidence_0.000_Length_2365, vo_c1_Locus_64_Transcript_5/17_Confidence_0.500_Length_2619, vo_n1_Locus_586_Transcript_20/171_Confidence_0.047_Length_1325, vo_c1_Locus_4849_Transcript_16/16_Confidence_0.222_Length_2335, vo_n1_Locus_5081_Transcript_2/2_Confidence_0.000_Length_1015, vo_c2_Locus_7918_Transcript_3/7_Confidence_0.333_Length_4982, vo_n3_Locus_81_Transcript_43/54_Confidence_0.347_Length_2521, tri_c_comp20278_c1_seq3, vo_n2_Locus_576_Transcript_1/11_Confidence_0.500_Length_2179, vo_c2_Locus_11169_Transcript_1/1_Confidence_0.000_Length_3106, vo_c1_Locus_247_Transcript_83/92_Confidence_0.091_Length_2168, vo_n1_Locus_331_Transcript_1/3_Confidence_0.864_Length_13100, tri_n_comp7525_c0_seq1, vo_n2_Locus_3_Transcript_8818/24291_Confidence_0.000_Length_11199, vo_c3_Locus_5_Transcript_122/353_Confidence_0.031_Length_2266, vo_n3_Locus_81_Transcript_3/54_Confidence_0.095_Length_356, tri_c_comp42419_c0_seq1, vo_n2_Locus_1836_Transcript_11/26_Confidence_0.553_Length_4022, vo_n2_Locus_1836_Transcript_9/26_Confidence_0.421_Length_3319, vo_c1_Locus_21246_Transcript_3/3_Confidence_0.000_Length_1335, vo_c3_Locus_5_Transcript_314/353_Confidence_0.041_Length_5162, vo_n3_Locus_81_Transcript_53/54_Confidence_0.122_Length_3108, vo_c3_Locus_11720_Transcript_1/2_Confidence_0.333_Length_4343, vo_c3_Locus_5_Transcript_139/353_Confidence_0.032_Length_2633, vo_n3_Locus_81_Transcript_38/54_Confidence_0.388_Length_3107, vo_n3_Locus_18043_Transcript_2/3_Confidence_0.667_Length_2705, vo_n2_Locus_3_Transcript_6549/24291_Confidence_0.000_Length_3661, vo_c1_Locus_4_Transcript_267/366_Confidence_0.015_Length_1391, vo_n3_Locus_9081_Transcript_1/2_Confidence_0.909_Length_2859, vo_c2_Locus_6435_Transcript_5/6_Confidence_0.032_Length_7385, vo_c2_Locus_12150_Transcript_7/14_Confidence_0.200_Length_5692, vo_n1_Locus_68_Transcript_23/39_Confidence_0.150_Length_2727, vo_c1_Locus_21235_Transcript_2/4_Confidence_0.625_Length_1588, vo_n3_Locus_427_Transcript_112/175_Confidence_0.081_Length_2772,</p> |
|--|--|--|--|-------------------------------------------------------------------------------------------------------------------------------------------------------------------------------------------------------------------------------------------------------------------------------------------------------------------------------------------------------------------------------------------------------------------------------------------------------------------------------------------------------------------------------------------------------------------------------------------------------------------------------------------------------------------------------------------------------------------------------------------------------------------------------------------------------------------------------------------------------------------------------------------------------------------------------------------------------------------------------------------------------------------------------------------------------------------------------------------------------------------------------------------------------------------------------------------------------------------------------------------------------------------------------------------------------------------------------------------------------------------------------------------------------------------------------------------------------------------------------------------------------------------------------------------------------------------------------------------------------------------------------------------------------------------------------------------------------------------------------------------------------------------------------------------------------------------------------------------------------------------------------------------------------------------------------------------------------------------------------------------------------------------------------------------------------------------------------------------------------------------------------------------------------------------------------------------------------------------------------------------------------------------------------------------------------------------------------------------------------------------------------------------------------------------------------------------------------------------------------------------------------------------------------------------------------------------------------------------------------------------------------------------------------------------------------------------------------------------------------------------------------------------------------------------------------------------------------------------------------------------------------------------------------------------------------------------------------------------------------------------------------------------------------------------------------------------------------------------------------------------------------------------------------------------------------------------------------------------------------------------------------------------------------------------------------------------------------------------------------------------------------------------------------------------------------------------------------------------------------------------------------------------------------------------------------------------------------------------------------------------------------------------------------------------------------------------------------------------------------------------------------------------------------------------------------------------------------------------------------------------------------------------------------------------------------------------------------------------------------------------------------------------------------------------------------------------------------------------------------------------------------------------------------------------------------------------------------------------------------------------------------------------------------------------------------------------------------------------------------------------------------------------------------------------------------------------------------------------------------------------------------------------------------------------------------------------------------------------------------------------------------------------------------------------------------------------------------------------------------------------------------------------------------------------------------------------------------------------------------------------------------------------------------------------------------------------------------------------------------------------------------------------------------------------------------------------------------------------------------------------------------------------------------------------------------------------------------------------------------------------------------------------------------------------------------------------------------------------------------------------------------------------------------------------------------------------------------------------------------------------------------------------------------------------------------------------------------------------------------------------------------------------------------------------------------------------------------------------------------------------------------------------------------------------------------------------------------------------------------------------------------------------------------------------------------------------------------------------------------------------------------------------------------------------------------------------------------------------------------------------------------------------------------------------------------------------------------------------------------------------------------------------------------------------------------------------------------------------------------------------------------------------------------------------------------------------------------------------------------------------------------------------------------------------------------------------------------------------------------------------------------------------------------------------------------------------------------------------------------------------------------------------------------------------------------------------------------------------------------------------|



|  |  |  |  |                                                                                                                                                                                                                                                                                                                                                                                                                                                                                                                                                                                                                                                                                                                                                                                                                                                                                                                                                                                                                                                                                                                                                                                                                                                                                                                                                                                                                                                                                                                                                                                                                                                                                                                                                                                                                                                                                                                                                                                                                                                                                                                                                                                                                                                                                                                                                                                                                                                                                                                                                                                                                                                                                                                                                                                                                                                                                                                                                                                                                                                                                                                                                                                                                                                                                                                                                                                                                                                                                                                                                                                                                                                                                                                                                                                                                                                                                                                                                                                                                                                                                                                                                                                                                                                                                                                                                                                                                                                                                                                                                                                                                                                                                                                                                                                                                                                                                                                                                                                                                                                                                                                                                                                                                                                                                                                                                                                                                                                                                                                                                                                                                                                                                                                                                                                                                                                                                                                                                                                                                                                                                                                                                                                                                                                                                                                                                                                                                                                                                                                                                                                                                                                                                                                                                                                                                                                                                                                                          |
|--|--|--|--|------------------------------------------------------------------------------------------------------------------------------------------------------------------------------------------------------------------------------------------------------------------------------------------------------------------------------------------------------------------------------------------------------------------------------------------------------------------------------------------------------------------------------------------------------------------------------------------------------------------------------------------------------------------------------------------------------------------------------------------------------------------------------------------------------------------------------------------------------------------------------------------------------------------------------------------------------------------------------------------------------------------------------------------------------------------------------------------------------------------------------------------------------------------------------------------------------------------------------------------------------------------------------------------------------------------------------------------------------------------------------------------------------------------------------------------------------------------------------------------------------------------------------------------------------------------------------------------------------------------------------------------------------------------------------------------------------------------------------------------------------------------------------------------------------------------------------------------------------------------------------------------------------------------------------------------------------------------------------------------------------------------------------------------------------------------------------------------------------------------------------------------------------------------------------------------------------------------------------------------------------------------------------------------------------------------------------------------------------------------------------------------------------------------------------------------------------------------------------------------------------------------------------------------------------------------------------------------------------------------------------------------------------------------------------------------------------------------------------------------------------------------------------------------------------------------------------------------------------------------------------------------------------------------------------------------------------------------------------------------------------------------------------------------------------------------------------------------------------------------------------------------------------------------------------------------------------------------------------------------------------------------------------------------------------------------------------------------------------------------------------------------------------------------------------------------------------------------------------------------------------------------------------------------------------------------------------------------------------------------------------------------------------------------------------------------------------------------------------------------------------------------------------------------------------------------------------------------------------------------------------------------------------------------------------------------------------------------------------------------------------------------------------------------------------------------------------------------------------------------------------------------------------------------------------------------------------------------------------------------------------------------------------------------------------------------------------------------------------------------------------------------------------------------------------------------------------------------------------------------------------------------------------------------------------------------------------------------------------------------------------------------------------------------------------------------------------------------------------------------------------------------------------------------------------------------------------------------------------------------------------------------------------------------------------------------------------------------------------------------------------------------------------------------------------------------------------------------------------------------------------------------------------------------------------------------------------------------------------------------------------------------------------------------------------------------------------------------------------------------------------------------------------------------------------------------------------------------------------------------------------------------------------------------------------------------------------------------------------------------------------------------------------------------------------------------------------------------------------------------------------------------------------------------------------------------------------------------------------------------------------------------------------------------------------------------------------------------------------------------------------------------------------------------------------------------------------------------------------------------------------------------------------------------------------------------------------------------------------------------------------------------------------------------------------------------------------------------------------------------------------------------------------------------------------------------------------------------------------------------------------------------------------------------------------------------------------------------------------------------------------------------------------------------------------------------------------------------------------------------------------------------------------------------------------------------------------------------------------------------------------------------------------------------------------------------|
|  |  |  |  | <p>tri_n_comp55121_c0_seq1, vo_c2_Locus_6519_Transcript_1/1_Confidence_0.000_Length_1138,<br/>vo_c1_Locus_31507_Transcript_2/2_Confidence_0.000_Length_3719, vo_n2_Locus_3_Transcript_6520/24291_Confidence_0.000_Length_2555,<br/>vo_c1_Locus_247_Transcript_89/92_Confidence_0.134_Length_2677, vo_c1_Locus_26083_Transcript_6/7_Confidence_0.091_Length_760,<br/>vo_c1_Locus_31191_Transcript_2/4_Confidence_0.810_Length_5131, vo_c2_Locus_7918_Transcript_1/7_Confidence_0.111_Length_5075,<br/>vo_n3_Locus_11624_Transcript_2/6_Confidence_0.500_Length_713, vo_c1_Locus_24254_Transcript_1/2_Confidence_0.667_Length_2432,<br/>vo_n1_Locus_7897_Transcript_10/12_Confidence_0.400_Length_12811, vo_n2_Locus_2647_Transcript_12/14_Confidence_0.579_Length_10184,<br/>vo_c2_Locus_703_Transcript_1/2_Confidence_0.333_Length_2334, tri_c_comp12118_c0_seq2,<br/>vo_c1_Locus_247_Transcript_71/92_Confidence_0.039_Length_2524, vo_c3_Locus_1323_Transcript_1/23_Confidence_0.045_Length_621,<br/>vo_n2_Locus_2314_Transcript_1/1_Confidence_0.667_Length_1996, vo_n1_Locus_68_Transcript_36/39_Confidence_0.267_Length_1533,<br/>vo_c1_Locus_31_Transcript_982/1155_Confidence_0.007_Length_2463, vo_n2_Locus_20021_Transcript_3/5_Confidence_0.688_Length_3229,<br/>vo_n2_Locus_3_Transcript_20541/24291_Confidence_0.000_Length_3818, vo_c3_Locus_5_Transcript_321/353_Confidence_0.051_Length_2976,<br/>vo_c3_Locus_324_Transcript_24/40_Confidence_0.286_Length_4286, vo_n2_Locus_12320_Transcript_1/3_Confidence_0.600_Length_1445,<br/>vo_n1_Locus_2635_Transcript_1/21_Confidence_0.406_Length_3170, tri_c_comp13353_c0_seq1, tri_n_comp20201_c0_seq3,<br/>vo_n2_Locus_7754_Transcript_3/3_Confidence_0.167_Length_2874, tri_c_comp13353_c0_seq2, tri_c_comp50556_c0_seq1,<br/>vo_c2_Locus_37_Transcript_76/305_Confidence_0.039_Length_3490, vo_c2_Locus_9988_Transcript_6/11_Confidence_0.611_Length_2701,<br/>vo_n3_Locus_3787_Transcript_3/6_Confidence_0.462_Length_2514, vo_n1_Locus_4600_Transcript_20/22_Confidence_0.250_Length_12970,<br/>vo_c2_Locus_579_Transcript_233/548_Confidence_0.006_Length_12924, vo_n1_Locus_26480_Transcript_1/1_Confidence_0.000_Length_2601,<br/>vo_n2_Locus_3_Transcript_20538/24291_Confidence_0.001_Length_4570, vo_n1_Locus_869_Transcript_5/10_Confidence_0.224_Length_12948,<br/>vo_n3_Locus_81_Transcript_44/54_Confidence_0.354_Length_2429, vo_n1_Locus_3_Transcript_53/53_Confidence_0.045_Length_1965,<br/>vo_c1_Locus_31_Transcript_944/1155_Confidence_0.006_Length_1733, vo_n1_Locus_68_Transcript_21/39_Confidence_0.192_Length_6030,<br/>vo_n2_Locus_18661_Transcript_4/4_Confidence_0.000_Length_7078, vo_n3_Locus_81_Transcript_46/54_Confidence_0.340_Length_2532,<br/>tri_c_comp40807_c0_seq1, tri_n_comp50453_c0_seq1, vo_c3_Locus_7422_Transcript_1/2_Confidence_1.000_Length_5077,<br/>vo_n2_Locus_3_Transcript_6587/24291_Confidence_0.001_Length_4002, vo_c3_Locus_5_Transcript_148/353_Confidence_0.052_Length_4150,<br/>vo_n2_Locus_3_Transcript_2135/24291_Confidence_0.000_Length_5848, tri_c_comp9981_c0_seq1,<br/>vo_c2_Locus_37_Transcript_71/305_Confidence_0.030_Length_7470, vo_c3_Locus_5_Transcript_151/353_Confidence_0.013_Length_2255,<br/>vo_n2_Locus_1836_Transcript_3/26_Confidence_0.579_Length_3826, vo_n2_Locus_12166_Transcript_1/1_Confidence_0.000_Length_2506,<br/>vo_n2_Locus_5350_Transcript_3/6_Confidence_0.375_Length_4163, vo_c3_Locus_32274_Transcript_3/4_Confidence_0.333_Length_1761,<br/>vo_c3_Locus_32274_Transcript_4/4_Confidence_0.111_Length_782, tri_c_comp8863_c0_seq2, tri_c_comp31434_c0_seq1,<br/>vo_n1_Locus_11021_Transcript_1/1_Confidence_0.000_Length_1895, vo_c1_Locus_16918_Transcript_2/2_Confidence_0.000_Length_1637,<br/>vo_n2_Locus_15575_Transcript_2/4_Confidence_0.714_Length_1610, tri_c_comp4030_c0_seq1,<br/>vo_c2_Locus_35825_Transcript_1/2_Confidence_0.500_Length_995, vo_c2_Locus_35825_Transcript_2/2_Confidence_0.000_Length_972,<br/>tri_n_comp34093_c0_seq1, vo_c2_Locus_11939_Transcript_1/4_Confidence_0.273_Length_1336,<br/>vo_c1_Locus_18906_Transcript_3/4_Confidence_0.400_Length_1298, vo_c2_Locus_26280_Transcript_1/1_Confidence_0.000_Length_1316,<br/>vo_c1_Locus_31652_Transcript_2/3_Confidence_0.429_Length_964, vo_c3_Locus_2584_Transcript_3/5_Confidence_0.727_Length_2680,<br/>vo_c3_Locus_2584_Transcript_5/5_Confidence_0.500_Length_3685, vo_c1_Locus_2715_Transcript_9/14_Confidence_0.429_Length_1359,<br/>vo_c1_Locus_2066_Transcript_3/17_Confidence_0.415_Length_3989, vo_c3_Locus_4226_Transcript_1/2_Confidence_1.000_Length_2714,<br/>vo_c1_Locus_10489_Transcript_1/1_Confidence_0.000_Length_1447, vo_c2_Locus_80_Transcript_8/10_Confidence_0.310_Length_2635,<br/>vo_c1_Locus_2066_Transcript_16/17_Confidence_0.293_Length_2774, vo_n1_Locus_4390_Transcript_2/5_Confidence_0.333_Length_2677,<br/>vo_n1_Locus_4390_Transcript_3/5_Confidence_0.600_Length_2659, vo_n2_Locus_2860_Transcript_3/6_Confidence_0.250_Length_3111,<br/>vo_n1_Locus_2992_Transcript_5/14_Confidence_0.476_Length_1500, vo_n2_Locus_294_Transcript_20/20_Confidence_0.167_Length_2119,<br/>vo_c3_Locus_3000_Transcript_12/15_Confidence_0.407_Length_1288, vo_c2_Locus_5247_Transcript_3/7_Confidence_0.500_Length_1443,<br/>vo_n1_Locus_357_Transcript_3/6_Confidence_0.429_Length_2710, vo_c2_Locus_5247_Transcript_6/7_Confidence_0.600_Length_1453,<br/>vo_c2_Locus_80_Transcript_10/10_Confidence_0.207_Length_2759, vo_c3_Locus_3000_Transcript_6/15_Confidence_0.556_Length_1355,<br/>vo_n1_Locus_1856_Transcript_4/7_Confidence_0.462_Length_1396, vo_c2_Locus_5247_Transcript_5/7_Confidence_0.300_Length_1303,<br/>vo_c2_Locus_5247_Transcript_4/7_Confidence_0.400_Length_1501, vo_c1_Locus_2715_Transcript_6/14_Confidence_0.429_Length_1383,<br/>vo_c3_Locus_3737_Transcript_1/1_Confidence_0.500_Length_2762, vo_c2_Locus_5247_Transcript_7/7_Confidence_0.100_Length_1511,<br/>tri_c_comp13375_c0_seq4, vo_c1_Locus_1353_Transcript_2/5_Confidence_0.600_Length_1352,<br/>vo_c3_Locus_3000_Transcript_7/15_Confidence_0.259_Length_1522, vo_c2_Locus_6282_Transcript_1/2_Confidence_0.857_Length_2758,<br/>vo_n2_Locus_2860_Transcript_4/6_Confidence_0.583_Length_4084, tri_c_comp13375_c0_seq3,<br/>vo_n1_Locus_2992_Transcript_6/14_Confidence_0.476_Length_1522, vo_c2_Locus_1093_Transcript_1/3_Confidence_0.714_Length_1748,<br/>vo_c2_Locus_1093_Transcript_3/3_Confidence_0.286_Length_1727, tri_n_comp22909_c0_seq1, tri_c_comp21907_c0_seq1,<br/>vo_c2_Locus_5036_Transcript_1/2_Confidence_1.000_Length_1776, vo_c2_Locus_35825_Transcript_1/2_Confidence_0.500_Length_995,<br/>vo_c2_Locus_35825_Transcript_2/2_Confidence_0.000_Length_972, tri_n_comp14890_c0_seq3,<br/>vo_c1_Locus_103_Transcript_20/42_Confidence_0.312_Length_4488, vo_n2_Locus_12749_Transcript_4/14_Confidence_0.387_Length_2426,<br/>vo_c3_Locus_9603_Transcr</p> |
|--|--|--|--|------------------------------------------------------------------------------------------------------------------------------------------------------------------------------------------------------------------------------------------------------------------------------------------------------------------------------------------------------------------------------------------------------------------------------------------------------------------------------------------------------------------------------------------------------------------------------------------------------------------------------------------------------------------------------------------------------------------------------------------------------------------------------------------------------------------------------------------------------------------------------------------------------------------------------------------------------------------------------------------------------------------------------------------------------------------------------------------------------------------------------------------------------------------------------------------------------------------------------------------------------------------------------------------------------------------------------------------------------------------------------------------------------------------------------------------------------------------------------------------------------------------------------------------------------------------------------------------------------------------------------------------------------------------------------------------------------------------------------------------------------------------------------------------------------------------------------------------------------------------------------------------------------------------------------------------------------------------------------------------------------------------------------------------------------------------------------------------------------------------------------------------------------------------------------------------------------------------------------------------------------------------------------------------------------------------------------------------------------------------------------------------------------------------------------------------------------------------------------------------------------------------------------------------------------------------------------------------------------------------------------------------------------------------------------------------------------------------------------------------------------------------------------------------------------------------------------------------------------------------------------------------------------------------------------------------------------------------------------------------------------------------------------------------------------------------------------------------------------------------------------------------------------------------------------------------------------------------------------------------------------------------------------------------------------------------------------------------------------------------------------------------------------------------------------------------------------------------------------------------------------------------------------------------------------------------------------------------------------------------------------------------------------------------------------------------------------------------------------------------------------------------------------------------------------------------------------------------------------------------------------------------------------------------------------------------------------------------------------------------------------------------------------------------------------------------------------------------------------------------------------------------------------------------------------------------------------------------------------------------------------------------------------------------------------------------------------------------------------------------------------------------------------------------------------------------------------------------------------------------------------------------------------------------------------------------------------------------------------------------------------------------------------------------------------------------------------------------------------------------------------------------------------------------------------------------------------------------------------------------------------------------------------------------------------------------------------------------------------------------------------------------------------------------------------------------------------------------------------------------------------------------------------------------------------------------------------------------------------------------------------------------------------------------------------------------------------------------------------------------------------------------------------------------------------------------------------------------------------------------------------------------------------------------------------------------------------------------------------------------------------------------------------------------------------------------------------------------------------------------------------------------------------------------------------------------------------------------------------------------------------------------------------------------------------------------------------------------------------------------------------------------------------------------------------------------------------------------------------------------------------------------------------------------------------------------------------------------------------------------------------------------------------------------------------------------------------------------------------------------------------------------------------------------------------------------------------------------------------------------------------------------------------------------------------------------------------------------------------------------------------------------------------------------------------------------------------------------------------------------------------------------------------------------------------------------------------------------------------------------------------------------------------------------------------------------|

|                                               |          |    |                                                                                                                                                                                                                                                                                                                                                                                                                                                                                                                                                                                                                                                                                                                                                                                                                                                                                                                                                                                                                                              |                                                                                                |                                                                                                                                                                                                                                                                                                                                                                                                                                                                                                                                                                                                                                                                                                                                                                                                                                                                                                                                                                                                                                                                                                                                                                                                                                                                                                                                                                                                                                                                                                                                                                                                                                                                                                                                                                                                                                                                                                                                                                                                                                                                                                                                                                                                                                                                                                                                                                                                                                                                                                                                                                                                                                                                                                                                                                                                                                                                                                                                                                                                                                                                                                                                                                                                                                                                                                                                                                                                                                                                                                                                                                                                                                                                                                                                                                                                                                                                                                                                                                                                                                                                                                                                                                                                                                                                                                                                                                                                                                                                                                                                                                                                                                                                                                                                                                                                                                                                                                                                                                                  |
|-----------------------------------------------|----------|----|----------------------------------------------------------------------------------------------------------------------------------------------------------------------------------------------------------------------------------------------------------------------------------------------------------------------------------------------------------------------------------------------------------------------------------------------------------------------------------------------------------------------------------------------------------------------------------------------------------------------------------------------------------------------------------------------------------------------------------------------------------------------------------------------------------------------------------------------------------------------------------------------------------------------------------------------------------------------------------------------------------------------------------------------|------------------------------------------------------------------------------------------------|----------------------------------------------------------------------------------------------------------------------------------------------------------------------------------------------------------------------------------------------------------------------------------------------------------------------------------------------------------------------------------------------------------------------------------------------------------------------------------------------------------------------------------------------------------------------------------------------------------------------------------------------------------------------------------------------------------------------------------------------------------------------------------------------------------------------------------------------------------------------------------------------------------------------------------------------------------------------------------------------------------------------------------------------------------------------------------------------------------------------------------------------------------------------------------------------------------------------------------------------------------------------------------------------------------------------------------------------------------------------------------------------------------------------------------------------------------------------------------------------------------------------------------------------------------------------------------------------------------------------------------------------------------------------------------------------------------------------------------------------------------------------------------------------------------------------------------------------------------------------------------------------------------------------------------------------------------------------------------------------------------------------------------------------------------------------------------------------------------------------------------------------------------------------------------------------------------------------------------------------------------------------------------------------------------------------------------------------------------------------------------------------------------------------------------------------------------------------------------------------------------------------------------------------------------------------------------------------------------------------------------------------------------------------------------------------------------------------------------------------------------------------------------------------------------------------------------------------------------------------------------------------------------------------------------------------------------------------------------------------------------------------------------------------------------------------------------------------------------------------------------------------------------------------------------------------------------------------------------------------------------------------------------------------------------------------------------------------------------------------------------------------------------------------------------------------------------------------------------------------------------------------------------------------------------------------------------------------------------------------------------------------------------------------------------------------------------------------------------------------------------------------------------------------------------------------------------------------------------------------------------------------------------------------------------------------------------------------------------------------------------------------------------------------------------------------------------------------------------------------------------------------------------------------------------------------------------------------------------------------------------------------------------------------------------------------------------------------------------------------------------------------------------------------------------------------------------------------------------------------------------------------------------------------------------------------------------------------------------------------------------------------------------------------------------------------------------------------------------------------------------------------------------------------------------------------------------------------------------------------------------------------------------------------------------------------------------------------------------|
| Amino sugar and nucleotid e sugar metabolis m | map00520 | 29 | <p>ec:1.1.1.187 - reductase, ec:2.6.1.16 - transaminase (isomerizing), ec:2.7.1.44 - galacturonokinase (phosphorylating) D-galacturonic acid kinase, ec:2.7.1.46 - L-arabinokinase (phosphorylating), ec:2.7.1.43 - glucuronokinase (phosphorylating), ec:4.2.1.76 - 4,6-dehydratase, ec:5.3.1.8 - isomerase, ec:5.3.1.9 - isomerase, ec:3.2.1.52 - hexosaminidase, ec:2.7.7.44 - uridylyltransferase, ec:3.2.1.55 - end alpha-L-arabinofuranosidase, ec:2.7.7.10 - uridylyltransferase, ec:2.7.7.12 - uridylyltransferase, ec:2.3.1.4 - N-acetyltransferase, ec:3.2.1.14 - ChiC, ec:2.7.1.2 - glucokinase (phosphorylating), ec:2.7.1.6 - galactokinase (phosphorylating), ec:5.1.3.2 - 4-epimerase, ec:5.1.3.5 - 4-epimerase, ec:5.1.3.6 - 4-epimerase, ec:2.7.7.9 - uridylyltransferase, ec:1.1.1.271 - synthase, ec:5.4.99.9 - mutase, ec:3.5.99.6 - deaminase, ec:4.2.1.47 - 4,6-dehydratase, ec:1.6.2.2 - reductase, ec:5.4.2.2 - (alpha-D-glucose-1,6-bisphosphate-dependent), ec:5.4.2.3 - mutase, ec:1.1.1.22 - 6-dehydrogenase</p> | <p>1, 1, 2, 3, 2, 2, 2, 2, 13, 5, 1, 5, 1, 1, 1, 2, 4, 9, 3, 1, 10, 1, 3, 1, 3, 1, 7, 1, 1</p> | <p>vo_c2_Locus_4832_Transcript_1/1_Confidence_0.000_Length_1285, vo_n2_Locus_1408_Transcript_4/5_Confidence_0.222_Length_11768, tri_c_comp10536_c0_seq1, vo_c2_Locus_32726_Transcript_2/2_Confidence_0.000_Length_696, tri_c_comp10536_c0_seq1, tri_c_comp28455_c0_seq1, vo_c2_Locus_32726_Transcript_2/2_Confidence_0.000_Length_696, tri_c_comp10536_c0_seq1, vo_c2_Locus_32726_Transcript_2/2_Confidence_0.000_Length_696, vo_c2_Locus_5377_Transcript_5/9_Confidence_0.150_Length_2142, vo_n1_Locus_5366_Transcript_4/4_Confidence_0.556_Length_1623, vo_c2_Locus_1828_Transcript_1/2_Confidence_0.963_Length_1886, vo_n2_Locus_19533_Transcript_1/1_Confidence_0.000_Length_1783, vo_n2_Locus_11241_Transcript_1/3_Confidence_0.600_Length_3773, vo_c2_Locus_479_Transcript_1/2_Confidence_1.000_Length_2154, vo_c3_Locus_25279_Transcript_1/3_Confidence_0.500_Length_3460, tri_c_comp15706_c0_seq2, vo_n2_Locus_4554_Transcript_3/4_Confidence_0.444_Length_2253, vo_n2_Locus_3_Transcript_18735/24291_Confidence_0.000_Length_2121, vo_n2_Locus_4395_Transcript_3/3_Confidence_0.167_Length_2032, vo_c2_Locus_6406_Transcript_1/4_Confidence_0.333_Length_1666, vo_n1_Locus_14758_Transcript_1/2_Confidence_0.667_Length_1933, tri_n_comp35667_c0_seq1, vo_n2_Locus_4395_Transcript_1/3_Confidence_0.667_Length_1925, tri_c_comp32936_c0_seq1, tri_n_comp92955_c0_seq1, tri_n_comp30287_c0_seq1, vo_n2_Locus_4554_Transcript_4/4_Confidence_0.111_Length_2049, vo_n2_Locus_12563_Transcript_1/1_Confidence_0.000_Length_1886, vo_c1_Locus_21075_Transcript_1/3_Confidence_0.500_Length_1034, vo_n1_Locus_3509_Transcript_2/2_Confidence_0.000_Length_1894, tri_c_comp13085_c0_seq3, tri_c_comp54583_c0_seq1, vo_n1_Locus_20887_Transcript_1/1_Confidence_0.000_Length_886, vo_n2_Locus_12563_Transcript_1/1_Confidence_0.000_Length_1886, vo_c1_Locus_21075_Transcript_1/3_Confidence_0.500_Length_1034, vo_n1_Locus_3509_Transcript_2/2_Confidence_0.000_Length_1894, tri_c_comp13085_c0_seq3, tri_c_comp54583_c0_seq1, vo_n2_Locus_26011_Transcript_1/2_Confidence_0.333_Length_2712, vo_n2_Locus_23544_Transcript_2/2_Confidence_0.333_Length_704, vo_n1_Locus_19422_Transcript_1/1_Confidence_0.000_Length_1575, tri_c_comp10536_c0_seq1, vo_c2_Locus_32726_Transcript_2/2_Confidence_0.000_Length_696, vo_n1_Locus_7597_Transcript_1/2_Confidence_0.333_Length_2494, tri_c_comp10536_c0_seq1, vo_c1_Locus_21386_Transcript_3/8_Confidence_0.538_Length_942, vo_c2_Locus_32726_Transcript_2/2_Confidence_0.000_Length_696, vo_c2_Locus_13936_Transcript_11/19_Confidence_0.261_Length_294, tri_n_comp13578_c0_seq1, vo_n1_Locus_7847_Transcript_10/14_Confidence_0.579_Length_1000, vo_n2_Locus_711_Transcript_4/13_Confidence_0.474_Length_608, vo_c3_Locus_20156_Transcript_3/3_Confidence_0.000_Length_1297, vo_n2_Locus_711_Transcript_10/13_Confidence_0.316_Length_1285, vo_n2_Locus_711_Transcript_7/13_Confidence_0.474_Length_690, vo_c2_Locus_13936_Transcript_3/19_Confidence_0.435_Length_599, vo_n1_Locus_7847_Transcript_3/14_Confidence_0.105_Length_511, tri_n_comp13578_c0_seq1, vo_c3_Locus_20156_Transcript_3/3_Confidence_0.000_Length_1297, vo_n2_Locus_711_Transcript_10/13_Confidence_0.316_Length_1285, vo_n1_Locus_4249_Transcript_3/6_Confidence_0.438_Length_1199, vo_n1_Locus_14248_Transcript_2/11_Confidence_0.333_Length_688, vo_c1_Locus_21075_Transcript_1/3_Confidence_0.500_Length_1034, vo_c2_Locus_2206_Transcript_1/2_Confidence_1.000_Length_1671, tri_c_comp13085_c0_seq3, tri_c_comp54583_c0_seq1, vo_c2_Locus_2427_Transcript_3/6_Confidence_0.455_Length_1530, vo_n2_Locus_12563_Transcript_1/1_Confidence_0.000_Length_1886, vo_n2_Locus_6619_Transcript_2/3_Confidence_0.571_Length_1613, vo_n1_Locus_3509_Transcript_2/2_Confidence_0.000_Length_1894, vo_n1_Locus_14248_Transcript_5/11_Confidence_0.222_Length_1040, vo_c2_Locus_4832_Transcript_1/1_Confidence_0.000_Length_1285, vo_c2_Locus_3850_Transcript_1/4_Confidence_0.500_Length_2735, vo_c2_Locus_3850_Transcript_4/4_Confidence_0.250_Length_3514, vo_n2_Locus_1476_Transcript_2/3_Confidence_0.750_Length_1867, vo_c3_Locus_13309_Transcript_1/1_Confidence_0.000_Length_2744, tri_c_comp20306_c0_seq1, vo_c1_Locus_3665_Transcript_26/28_Confidence_0.462_Length_1222, vo_c2_Locus_1898_Transcript_1/15_Confidence_0.462_Length_1289, vo_n2_Locus_24042_Transcript_14/18_Confidence_0.340_Length_1703, tri_n_comp18813_c0_seq13, vo_c2_Locus_23037_Transcript_2/2_Confidence_0.000_Length_2109, vo_n3_Locus_362_Transcript_3/4_Confidence_0.364_Length_3895, vo_n3_Locus_362_Transcript_1/4_Confidence_0.727_Length_3306, vo_n1_Locus_5208_Transcript_2/2_Confidence_0.000_Length_2077, vo_c2_Locus_23037_Transcript_1/2_Confidence_0.750_Length_1965, vo_n3_Locus_15336_Transcript_1/1_Confidence_0.000_Length_1810, vo_n3_Locus_15336_Transcript_1/1_Confidence_0.000_Length_1810, vo_c1_Locus_11739_Transcript_1/3_Confidence_0.929_Length_1730</p> |
|-----------------------------------------------|----------|----|----------------------------------------------------------------------------------------------------------------------------------------------------------------------------------------------------------------------------------------------------------------------------------------------------------------------------------------------------------------------------------------------------------------------------------------------------------------------------------------------------------------------------------------------------------------------------------------------------------------------------------------------------------------------------------------------------------------------------------------------------------------------------------------------------------------------------------------------------------------------------------------------------------------------------------------------------------------------------------------------------------------------------------------------|------------------------------------------------------------------------------------------------|----------------------------------------------------------------------------------------------------------------------------------------------------------------------------------------------------------------------------------------------------------------------------------------------------------------------------------------------------------------------------------------------------------------------------------------------------------------------------------------------------------------------------------------------------------------------------------------------------------------------------------------------------------------------------------------------------------------------------------------------------------------------------------------------------------------------------------------------------------------------------------------------------------------------------------------------------------------------------------------------------------------------------------------------------------------------------------------------------------------------------------------------------------------------------------------------------------------------------------------------------------------------------------------------------------------------------------------------------------------------------------------------------------------------------------------------------------------------------------------------------------------------------------------------------------------------------------------------------------------------------------------------------------------------------------------------------------------------------------------------------------------------------------------------------------------------------------------------------------------------------------------------------------------------------------------------------------------------------------------------------------------------------------------------------------------------------------------------------------------------------------------------------------------------------------------------------------------------------------------------------------------------------------------------------------------------------------------------------------------------------------------------------------------------------------------------------------------------------------------------------------------------------------------------------------------------------------------------------------------------------------------------------------------------------------------------------------------------------------------------------------------------------------------------------------------------------------------------------------------------------------------------------------------------------------------------------------------------------------------------------------------------------------------------------------------------------------------------------------------------------------------------------------------------------------------------------------------------------------------------------------------------------------------------------------------------------------------------------------------------------------------------------------------------------------------------------------------------------------------------------------------------------------------------------------------------------------------------------------------------------------------------------------------------------------------------------------------------------------------------------------------------------------------------------------------------------------------------------------------------------------------------------------------------------------------------------------------------------------------------------------------------------------------------------------------------------------------------------------------------------------------------------------------------------------------------------------------------------------------------------------------------------------------------------------------------------------------------------------------------------------------------------------------------------------------------------------------------------------------------------------------------------------------------------------------------------------------------------------------------------------------------------------------------------------------------------------------------------------------------------------------------------------------------------------------------------------------------------------------------------------------------------------------------------------------------------------------------------------|

|                                    |          |    |                                                                                                                                                                                                                                                                                                                                                                                                                                                                                                                                                                                                                                                                                                                                                                                                                                                                                                                                                                                                                                                 |                                                                                                                            |                                                                                                                                                                                                                                                                                                                                                                                                                                                                                                                                                                                                                                                                                                                                                                                                                                                                                                                                                                                                                                                                                                                                                                                                                                                                                                                                                                                                                                                                                                                                                                                                                                                                                                                                                                                                                                                                                                                                                                                                                                                                                                                                                                                                                                                                                                                                                                                                                                                                                                                                                                                                                                                                                                                                                                                                                                                                                                                                                                                                                                                                                                                                                                                                                                                                                                                                                                                                                                                                                                                                                                                                                                                                                                                                                                                                                                                                                                                                                                                                                                                                                                                                                                                                                                                                                                                                                                                                                                                                                                                                                                                                                                                                                                                                                                                                                                                                                                                                                                                                                                                                                                                                                                                                                                                                                                                                                                                                                                                                                                                                                                                                                                                                                                                                                                                                                                                                                                                                                                                                                                                                                                                                                                                                                                                                                                                                                                                                                                                                                                                                                                                                                                                                                                                                                                                                                                                                                                                                                                                                                                                                                                                                                                                                                                                                               |
|------------------------------------|----------|----|-------------------------------------------------------------------------------------------------------------------------------------------------------------------------------------------------------------------------------------------------------------------------------------------------------------------------------------------------------------------------------------------------------------------------------------------------------------------------------------------------------------------------------------------------------------------------------------------------------------------------------------------------------------------------------------------------------------------------------------------------------------------------------------------------------------------------------------------------------------------------------------------------------------------------------------------------------------------------------------------------------------------------------------------------|----------------------------------------------------------------------------------------------------------------------------|-------------------------------------------------------------------------------------------------------------------------------------------------------------------------------------------------------------------------------------------------------------------------------------------------------------------------------------------------------------------------------------------------------------------------------------------------------------------------------------------------------------------------------------------------------------------------------------------------------------------------------------------------------------------------------------------------------------------------------------------------------------------------------------------------------------------------------------------------------------------------------------------------------------------------------------------------------------------------------------------------------------------------------------------------------------------------------------------------------------------------------------------------------------------------------------------------------------------------------------------------------------------------------------------------------------------------------------------------------------------------------------------------------------------------------------------------------------------------------------------------------------------------------------------------------------------------------------------------------------------------------------------------------------------------------------------------------------------------------------------------------------------------------------------------------------------------------------------------------------------------------------------------------------------------------------------------------------------------------------------------------------------------------------------------------------------------------------------------------------------------------------------------------------------------------------------------------------------------------------------------------------------------------------------------------------------------------------------------------------------------------------------------------------------------------------------------------------------------------------------------------------------------------------------------------------------------------------------------------------------------------------------------------------------------------------------------------------------------------------------------------------------------------------------------------------------------------------------------------------------------------------------------------------------------------------------------------------------------------------------------------------------------------------------------------------------------------------------------------------------------------------------------------------------------------------------------------------------------------------------------------------------------------------------------------------------------------------------------------------------------------------------------------------------------------------------------------------------------------------------------------------------------------------------------------------------------------------------------------------------------------------------------------------------------------------------------------------------------------------------------------------------------------------------------------------------------------------------------------------------------------------------------------------------------------------------------------------------------------------------------------------------------------------------------------------------------------------------------------------------------------------------------------------------------------------------------------------------------------------------------------------------------------------------------------------------------------------------------------------------------------------------------------------------------------------------------------------------------------------------------------------------------------------------------------------------------------------------------------------------------------------------------------------------------------------------------------------------------------------------------------------------------------------------------------------------------------------------------------------------------------------------------------------------------------------------------------------------------------------------------------------------------------------------------------------------------------------------------------------------------------------------------------------------------------------------------------------------------------------------------------------------------------------------------------------------------------------------------------------------------------------------------------------------------------------------------------------------------------------------------------------------------------------------------------------------------------------------------------------------------------------------------------------------------------------------------------------------------------------------------------------------------------------------------------------------------------------------------------------------------------------------------------------------------------------------------------------------------------------------------------------------------------------------------------------------------------------------------------------------------------------------------------------------------------------------------------------------------------------------------------------------------------------------------------------------------------------------------------------------------------------------------------------------------------------------------------------------------------------------------------------------------------------------------------------------------------------------------------------------------------------------------------------------------------------------------------------------------------------------------------------------------------------------------------------------------------------------------------------------------------------------------------------------------------------------------------------------------------------------------------------------------------------------------------------------------------------------------------------------------------------------------------------------------------------------------------------------------------------------------------------------------------|
| Cysteine and methionine metabolism | map00270 | 28 | <p>ec:2.7.2.4 - kinase,<br/> ec:2.6.1.42 - transaminase,<br/> ec:2.6.1.44 - transaminase,<br/> ec:2.5.1.16 - synthase,<br/> ec:2.5.1.22 - synthase,<br/> ec:1.2.1.11 -<br/> dehydrogenase, ec:2.5.1.6 -<br/> adenosyltransferase,<br/> ec:1.1.1.3 - dehydrogenase,<br/> ec:2.1.1.10 - S-<br/> methyltransferase,<br/> ec:2.1.1.13 - synthase,<br/> ec:3.3.1.1 - S-<br/> adenosylhomocysteine<br/> synthase, ec:2.6.1.1 -<br/> transaminase, ec:4.3.1.17 -<br/> ammonia-lyase, ec:4.4.1.8 -<br/> beta-lyase, ec:4.4.1.1 -<br/> gamma-lyase, ec:4.4.1.15 -<br/> desulfhydrase, ec:2.8.1.2 -<br/> sulfurtransferase, ec:6.3.2.3<br/> - synthase, ec:6.3.2.2 -<br/> ligase, ec:1.13.11.54 -<br/> dioxygenase [iron(II)-<br/> requiring], ec:2.3.1.31 - O-<br/> acetyltransferase,<br/> ec:2.3.1.30 - O-<br/> acetyltransferase,<br/> ec:1.13.11.20 - dioxygenase,<br/> ec:2.3.1.46 - O-<br/> succinyltransferase,<br/> ec:3.5.99.7 - deaminase,<br/> ec:4.2.1.22 - beta-synthase,<br/> ec:2.5.1.47 - synthase,<br/> ec:1.1.1.37 - dehydrogenase</p> | <p>7, 6, 2, 1,<br/> 2, 4, 18, 1,<br/> 4, 4, 39, 4,<br/> 2, 3, 7, 2,<br/> 1, 1, 5, 1,<br/> 4, 4, 2, 1,<br/> 2, 8, 5, 24</p> | <p>vo_c1_Locus_1636_Transcript_120/122_Confidence_0.135_Length_3625, tri_n_comp29741_c0_seq1,<br/> vo_c3_Locus_31_Transcript_74/79_Confidence_0.124_Length_2769, vo_c2_Locus_10862_Transcript_1/1_Confidence_0.000_Length_1564,<br/> vo_c3_Locus_31_Transcript_63/79_Confidence_0.148_Length_3613, vo_c1_Locus_1636_Transcript_116/122_Confidence_0.129_Length_3526,<br/> vo_c2_Locus_52_Transcript_164/466_Confidence_0.011_Length_2810, vo_c2_Locus_384_Transcript_2/3_Confidence_0.400_Length_1725,<br/> tri_c_comp32679_c0_seq1, vo_c1_Locus_10788_Transcript_1/1_Confidence_0.000_Length_1721,<br/> vo_c2_Locus_14969_Transcript_4/8_Confidence_0.750_Length_1231, vo_n2_Locus_3786_Transcript_2/4_Confidence_0.778_Length_1466,<br/> vo_n2_Locus_3786_Transcript_3/4_Confidence_0.667_Length_1442, vo_c3_Locus_33872_Transcript_1/1_Confidence_0.000_Length_1446,<br/> vo_c1_Locus_7220_Transcript_2/3_Confidence_0.400_Length_2898, vo_c2_Locus_25147_Transcript_1/2_Confidence_0.333_Length_1097,<br/> vo_c2_Locus_25147_Transcript_1/2_Confidence_0.333_Length_1097, tri_c_comp23701_c0_seq1,<br/> vo_n2_Locus_3068_Transcript_2/3_Confidence_0.250_Length_1991, vo_n1_Locus_4025_Transcript_3/5_Confidence_0.286_Length_3475,<br/> vo_c1_Locus_9004_Transcript_2/4_Confidence_0.400_Length_3537, vo_c1_Locus_10440_Transcript_1/2_Confidence_0.667_Length_1569,<br/> vo_c1_Locus_209_Transcript_22/41_Confidence_0.253_Length_2098, vo_n1_Locus_818_Transcript_23/28_Confidence_0.300_Length_1700,<br/> vo_n1_Locus_818_Transcript_22/28_Confidence_0.320_Length_1697, vo_c1_Locus_209_Transcript_25/41_Confidence_0.253_Length_2035,<br/> vo_n3_Locus_2574_Transcript_13/21_Confidence_0.419_Length_1731, vo_c1_Locus_209_Transcript_21/41_Confidence_0.207_Length_2111,<br/> vo_c1_Locus_209_Transcript_24/41_Confidence_0.241_Length_2150, vo_n3_Locus_2574_Transcript_6/21_Confidence_0.387_Length_1729,<br/> vo_n3_Locus_2574_Transcript_4/21_Confidence_0.323_Length_1795, vo_c2_Locus_1176_Transcript_15/36_Confidence_0.126_Length_2169,<br/> vo_n2_Locus_206_Transcript_73/103_Confidence_0.088_Length_2363, vo_c3_Locus_479_Transcript_94/98_Confidence_0.030_Length_2004,<br/> vo_c1_Locus_209_Transcript_23/41_Confidence_0.207_Length_2096, vo_c1_Locus_209_Transcript_38/41_Confidence_0.069_Length_1149,<br/> vo_c2_Locus_1176_Transcript_10/36_Confidence_0.150_Length_2209, vo_c3_Locus_479_Transcript_93/98_Confidence_0.072_Length_1825,<br/> vo_c2_Locus_1176_Transcript_2/36_Confidence_0.150_Length_1923, vo_c2_Locus_1176_Transcript_22/36_Confidence_0.087_Length_1396,<br/> vo_c2_Locus_10862_Transcript_1/1_Confidence_0.000_Length_1564, vo_n3_Locus_12898_Transcript_5/14_Confidence_0.429_Length_3637,<br/> vo_n2_Locus_4083_Transcript_7/15_Confidence_0.571_Length_4447, vo_c3_Locus_876_Transcript_5/9_Confidence_0.526_Length_3245,<br/> vo_n2_Locus_4083_Transcript_2/15_Confidence_0.619_Length_4830, vo_n3_Locus_12898_Transcript_5/14_Confidence_0.429_Length_3637,<br/> vo_n2_Locus_4083_Transcript_7/15_Confidence_0.571_Length_4447, vo_c3_Locus_876_Transcript_5/9_Confidence_0.526_Length_3245,<br/> vo_n2_Locus_4083_Transcript_2/15_Confidence_0.619_Length_4830, vo_c2_Locus_307_Transcript_26/35_Confidence_0.431_Length_2318,<br/> vo_c1_Locus_245_Transcript_19/37_Confidence_0.467_Length_1908, vo_n1_Locus_332_Transcript_22/32_Confidence_0.140_Length_1176,<br/> vo_n2_Locus_3_Transcript_3356/24291_Confidence_0.000_Length_1953, vo_c2_Locus_307_Transcript_11/35_Confidence_0.403_Length_2123,<br/> vo_c3_Locus_829_Transcript_29/29_Confidence_0.233_Length_1857, vo_c2_Locus_307_Transcript_20/35_Confidence_0.333_Length_1795,<br/> vo_n2_Locus_3_Transcript_3359/24291_Confidence_0.000_Length_2133, vo_n3_Locus_66_Transcript_20/33_Confidence_0.187_Length_1893,<br/> vo_n2_Locus_3_Transcript_3344/24291_Confidence_0.000_Length_2398, vo_c2_Locus_307_Transcript_13/35_Confidence_0.389_Length_2048,<br/> vo_c2_Locus_307_Transcript_19/35_Confidence_0.375_Length_1796, vo_c2_Locus_41824_Transcript_1/1_Confidence_0.750_Length_325,<br/> vo_n3_Locus_66_Transcript_32/33_Confidence_0.106_Length_2329, vo_c1_Locus_245_Transcript_8/37_Confidence_0.083_Length_2442,<br/> vo_c1_Locus_245_Transcript_9/37_Confidence_0.450_Length_2027, vo_c3_Locus_829_Transcript_5/29_Confidence_0.558_Length_1940,<br/> vo_n1_Locus_332_Transcript_14/32_Confidence_0.340_Length_2438, vo_n3_Locus_66_Transcript_13/33_Confidence_0.203_Length_1680,<br/> vo_n3_Locus_66_Transcript_21/33_Confidence_0.211_Length_2011, vo_c2_Locus_307_Transcript_17/35_Confidence_0.097_Length_2301,<br/> vo_n3_Locus_66_Transcript_23/33_Confidence_0.252_Length_2080, vo_n2_Locus_3_Transcript_3352/24291_Confidence_0.000_Length_1867,<br/> vo_c2_Locus_307_Transcript_7/35_Confidence_0.181_Length_3468, vo_c3_Locus_829_Transcript_8/29_Confidence_0.488_Length_1870,<br/> vo_n2_Locus_3_Transcript_3340/24291_Confidence_0.000_Length_2561, vo_n3_Locus_66_Transcript_18/33_Confidence_0.650_Length_2193,<br/> vo_c3_Locus_829_Transcript_3/29_Confidence_0.442_Length_1977, vo_n1_Locus_332_Transcript_21/32_Confidence_0.520_Length_3273,<br/> vo_n3_Locus_66_Transcript_28/33_Confidence_0.195_Length_1816, tri_n_comp20010_c0_seq1,<br/> vo_c1_Locus_245_Transcript_11/37_Confidence_0.350_Length_1730, vo_n2_Locus_3_Transcript_3339/24291_Confidence_0.000_Length_1719,<br/> vo_n1_Locus_332_Transcript_16/32_Confidence_0.330_Length_2427, tri_c_comp22471_c0_seq1,<br/> vo_n3_Locus_66_Transcript_22/33_Confidence_0.211_Length_1962, vo_n2_Locus_3_Transcript_3353/24291_Confidence_0.000_Length_1105,<br/> vo_n3_Locus_66_Transcript_26/33_Confidence_0.122_Length_3344, vo_n2_Locus_3_Transcript_3338/24291_Confidence_0.000_Length_1541,<br/> vo_n1_Locus_3423_Transcript_2/4_Confidence_0.250_Length_1347, tri_n_comp27683_c0_seq1,<br/> vo_c1_Locus_3127_Transcript_1/1_Confidence_0.000_Length_1478, vo_n1_Locus_3423_Transcript_3/4_Confidence_0.250_Length_1416,<br/> vo_c2_Locus_30746_Transcript_1/1_Confidence_0.000_Length_1279, vo_n1_Locus_2779_Transcript_1/2_Confidence_0.333_Length_2962,<br/> vo_n2_Locus_7374_Transcript_2/3_Confidence_0.750_Length_1746, vo_c2_Locus_31468_Transcript_4/5_Confidence_0.667_Length_1579,<br/> vo_n1_Locus_3498_Transcript_1/3_Confidence_0.600_Length_1462, tri_c_comp42317_c0_seq1,<br/> vo_n2_Locus_7374_Transcript_2/3_Confidence_0.750_Length_1746, vo_n2_Locus_8711_Transcript_5/5_Confidence_0.067_Length_1558,<br/> vo_c2_Locus_11984_Transcript_2/6_Confidence_0.385_Length_1557, vo_c2_Locus_31468_Transcript_4/5_Confidence_0.667_Length_1579,<br/> vo_n1_Locus_3498_Transcript_1/3_Confidence_0.600_Length_1462, tri_c_comp30049_c0_seq1,<br/> vo_c3_Locus_1071_Transcript_2/6_Confidence_0.571_Length_1547, vo_c1_Locus_1555_Transcript_3/3_Confidence_0.200_Length_1281,<br/> vo_n1_Locus_21114_Transcript_3/5_Confidence_0.444_Length_1255, vo_c1_Locus_8043_Transcript_1/1_Confidence_0.000_Length_1747,<br/> vo_n2_Locus_20981_Transcript_1/1_Confidence_0.000_Length_2435, vo_n2_Locus_5430_Transcript_2/3_Confidence_0.400_Length_1394,<br/> tri_n_comp34788_c0_seq1, vo_c1_Locus_1493_Transcript_3/4_Confidence_0.286_Length_2721,</p> |
|------------------------------------|----------|----|-------------------------------------------------------------------------------------------------------------------------------------------------------------------------------------------------------------------------------------------------------------------------------------------------------------------------------------------------------------------------------------------------------------------------------------------------------------------------------------------------------------------------------------------------------------------------------------------------------------------------------------------------------------------------------------------------------------------------------------------------------------------------------------------------------------------------------------------------------------------------------------------------------------------------------------------------------------------------------------------------------------------------------------------------|----------------------------------------------------------------------------------------------------------------------------|-------------------------------------------------------------------------------------------------------------------------------------------------------------------------------------------------------------------------------------------------------------------------------------------------------------------------------------------------------------------------------------------------------------------------------------------------------------------------------------------------------------------------------------------------------------------------------------------------------------------------------------------------------------------------------------------------------------------------------------------------------------------------------------------------------------------------------------------------------------------------------------------------------------------------------------------------------------------------------------------------------------------------------------------------------------------------------------------------------------------------------------------------------------------------------------------------------------------------------------------------------------------------------------------------------------------------------------------------------------------------------------------------------------------------------------------------------------------------------------------------------------------------------------------------------------------------------------------------------------------------------------------------------------------------------------------------------------------------------------------------------------------------------------------------------------------------------------------------------------------------------------------------------------------------------------------------------------------------------------------------------------------------------------------------------------------------------------------------------------------------------------------------------------------------------------------------------------------------------------------------------------------------------------------------------------------------------------------------------------------------------------------------------------------------------------------------------------------------------------------------------------------------------------------------------------------------------------------------------------------------------------------------------------------------------------------------------------------------------------------------------------------------------------------------------------------------------------------------------------------------------------------------------------------------------------------------------------------------------------------------------------------------------------------------------------------------------------------------------------------------------------------------------------------------------------------------------------------------------------------------------------------------------------------------------------------------------------------------------------------------------------------------------------------------------------------------------------------------------------------------------------------------------------------------------------------------------------------------------------------------------------------------------------------------------------------------------------------------------------------------------------------------------------------------------------------------------------------------------------------------------------------------------------------------------------------------------------------------------------------------------------------------------------------------------------------------------------------------------------------------------------------------------------------------------------------------------------------------------------------------------------------------------------------------------------------------------------------------------------------------------------------------------------------------------------------------------------------------------------------------------------------------------------------------------------------------------------------------------------------------------------------------------------------------------------------------------------------------------------------------------------------------------------------------------------------------------------------------------------------------------------------------------------------------------------------------------------------------------------------------------------------------------------------------------------------------------------------------------------------------------------------------------------------------------------------------------------------------------------------------------------------------------------------------------------------------------------------------------------------------------------------------------------------------------------------------------------------------------------------------------------------------------------------------------------------------------------------------------------------------------------------------------------------------------------------------------------------------------------------------------------------------------------------------------------------------------------------------------------------------------------------------------------------------------------------------------------------------------------------------------------------------------------------------------------------------------------------------------------------------------------------------------------------------------------------------------------------------------------------------------------------------------------------------------------------------------------------------------------------------------------------------------------------------------------------------------------------------------------------------------------------------------------------------------------------------------------------------------------------------------------------------------------------------------------------------------------------------------------------------------------------------------------------------------------------------------------------------------------------------------------------------------------------------------------------------------------------------------------------------------------------------------------------------------------------------------------------------------------------------------------------------------------------------------------------------------------------------------------------------------------------------------|

|  |  |  |  |                                                                                                                                                                                                                                                                                                                                                                                                                                                                                                                                                                                                                                                                                                                                                                                                                                                                                                                                                                                                                                                                                                                                                                                                                                                                                                                                                                                                                                                                                                                                                                                                                                                                                                                                                                                                                                                                                                                                                                                                                                                                                                                                                                                                                                                                                                                                                                                                                                                                                                                                                                                                                                                                                                                                                                                                                                                                                                                                                                                                                                                                                                                                                                                                                      |
|--|--|--|--|----------------------------------------------------------------------------------------------------------------------------------------------------------------------------------------------------------------------------------------------------------------------------------------------------------------------------------------------------------------------------------------------------------------------------------------------------------------------------------------------------------------------------------------------------------------------------------------------------------------------------------------------------------------------------------------------------------------------------------------------------------------------------------------------------------------------------------------------------------------------------------------------------------------------------------------------------------------------------------------------------------------------------------------------------------------------------------------------------------------------------------------------------------------------------------------------------------------------------------------------------------------------------------------------------------------------------------------------------------------------------------------------------------------------------------------------------------------------------------------------------------------------------------------------------------------------------------------------------------------------------------------------------------------------------------------------------------------------------------------------------------------------------------------------------------------------------------------------------------------------------------------------------------------------------------------------------------------------------------------------------------------------------------------------------------------------------------------------------------------------------------------------------------------------------------------------------------------------------------------------------------------------------------------------------------------------------------------------------------------------------------------------------------------------------------------------------------------------------------------------------------------------------------------------------------------------------------------------------------------------------------------------------------------------------------------------------------------------------------------------------------------------------------------------------------------------------------------------------------------------------------------------------------------------------------------------------------------------------------------------------------------------------------------------------------------------------------------------------------------------------------------------------------------------------------------------------------------------|
|  |  |  |  | <p>vo_n3_Locus_29456_Transcript_1/1_Confidence_0.000_Length_1949, tri_n_comp41228_c0_seq1,<br/>vo_n1_Locus_9946_Transcript_1/3_Confidence_0.714_Length_1615, vo_c1_Locus_2886_Transcript_6/19_Confidence_0.481_Length_4535,<br/>vo_c2_Locus_4812_Transcript_2/3_Confidence_0.625_Length_1578, vo_c2_Locus_4812_Transcript_1/3_Confidence_0.625_Length_1831,<br/>vo_n1_Locus_9946_Transcript_1/3_Confidence_0.714_Length_1615, vo_c1_Locus_2886_Transcript_6/19_Confidence_0.481_Length_4535,<br/>vo_c2_Locus_4812_Transcript_2/3_Confidence_0.625_Length_1578, vo_c2_Locus_4812_Transcript_1/3_Confidence_0.625_Length_1831,<br/>vo_c2_Locus_20699_Transcript_22/34_Confidence_0.180_Length_2604, vo_c2_Locus_20699_Transcript_12/34_Confidence_0.165_Length_2453,<br/>vo_n1_Locus_9681_Transcript_11/11_Confidence_0.000_Length_529, vo_c3_Locus_1071_Transcript_2/6_Confidence_0.571_Length_1547,<br/>vo_c1_Locus_1555_Transcript_3/3_Confidence_0.200_Length_1281, vo_n1_Locus_664_Transcript_3/4_Confidence_0.429_Length_1448,<br/>tri_n_comp16677_c0_seq4, vo_c1_Locus_1695_Transcript_1/2_Confidence_0.974_Length_1764, tri_n_comp16677_c0_seq1, tri_c_comp17806_c0_seq2,<br/>vo_c3_Locus_4013_Transcript_1/4_Confidence_0.625_Length_2457, vo_n2_Locus_211_Transcript_4/8_Confidence_0.400_Length_1517,<br/>vo_c2_Locus_615_Transcript_1/2_Confidence_0.400_Length_2717, vo_c2_Locus_2964_Transcript_1/2_Confidence_0.333_Length_1319,<br/>tri_c_comp42317_c0_seq1, vo_n2_Locus_211_Transcript_4/8_Confidence_0.400_Length_1517,<br/>vo_c1_Locus_1695_Transcript_1/2_Confidence_0.974_Length_1764, tri_n_comp16677_c0_seq1,<br/>vo_c3_Locus_1723_Transcript_29/37_Confidence_0.411_Length_1695, vo_n2_Locus_330_Transcript_25/38_Confidence_0.361_Length_1516,<br/>vo_c3_Locus_1723_Transcript_35/37_Confidence_0.464_Length_1702, vo_c1_Locus_15206_Transcript_3/3_Confidence_0.000_Length_1312,<br/>vo_c1_Locus_7371_Transcript_4/4_Confidence_0.600_Length_1352, vo_c3_Locus_1723_Transcript_37/37_Confidence_0.214_Length_1530,<br/>vo_n1_Locus_769_Transcript_28/41_Confidence_0.400_Length_1609, vo_n1_Locus_769_Transcript_9/41_Confidence_0.460_Length_1494,<br/>vo_c3_Locus_2965_Transcript_2/2_Confidence_0.250_Length_1327, vo_n2_Locus_330_Transcript_5/38_Confidence_0.328_Length_11715,<br/>vo_n1_Locus_9772_Transcript_1/2_Confidence_0.333_Length_1224, vo_c1_Locus_3603_Transcript_44/48_Confidence_0.492_Length_1696,<br/>vo_c2_Locus_4242_Transcript_2/3_Confidence_0.400_Length_1168, vo_n1_Locus_6649_Transcript_2/3_Confidence_0.500_Length_2124,<br/>vo_c1_Locus_7371_Transcript_1/4_Confidence_0.500_Length_1352, vo_n3_Locus_2381_Transcript_2/3_Confidence_0.500_Length_1330,<br/>vo_c3_Locus_1723_Transcript_16/37_Confidence_0.286_Length_1491, vo_n1_Locus_769_Transcript_36/41_Confidence_0.420_Length_1536,<br/>vo_n1_Locus_769_Transcript_40/41_Confidence_0.320_Length_1479, vo_n1_Locus_6649_Transcript_1/3_Confidence_0.750_Length_1883,<br/>vo_c1_Locus_3603_Transcript_26/48_Confidence_0.400_Length_1432, vo_n1_Locus_5348_Transcript_2/2_Confidence_0.200_Length_1608,<br/>vo_n3_Locus_3383_Transcript_35/37_Confidence_0.389_Length_1512, tri_c_comp20802_c0_seq1</p> |
|--|--|--|--|----------------------------------------------------------------------------------------------------------------------------------------------------------------------------------------------------------------------------------------------------------------------------------------------------------------------------------------------------------------------------------------------------------------------------------------------------------------------------------------------------------------------------------------------------------------------------------------------------------------------------------------------------------------------------------------------------------------------------------------------------------------------------------------------------------------------------------------------------------------------------------------------------------------------------------------------------------------------------------------------------------------------------------------------------------------------------------------------------------------------------------------------------------------------------------------------------------------------------------------------------------------------------------------------------------------------------------------------------------------------------------------------------------------------------------------------------------------------------------------------------------------------------------------------------------------------------------------------------------------------------------------------------------------------------------------------------------------------------------------------------------------------------------------------------------------------------------------------------------------------------------------------------------------------------------------------------------------------------------------------------------------------------------------------------------------------------------------------------------------------------------------------------------------------------------------------------------------------------------------------------------------------------------------------------------------------------------------------------------------------------------------------------------------------------------------------------------------------------------------------------------------------------------------------------------------------------------------------------------------------------------------------------------------------------------------------------------------------------------------------------------------------------------------------------------------------------------------------------------------------------------------------------------------------------------------------------------------------------------------------------------------------------------------------------------------------------------------------------------------------------------------------------------------------------------------------------------------------|

|                               |          |    |                                                                                                                                                                                                                                                                                                                                                                                                                                                                                                                                                                                                                                                                                                                                                                                                                                                                                                              |                                                                                      |                                                                                                                                                                                                                                                                                                                                                                                                                                                                                                                                                                                                                                                                                                                                                                                                                                                                                                                                                                                                                                                                                                                                                                                                                                                                                                                                                                                                                                                                                                                                                                                                                                                                                                                                                                                                                                                                                                                                                                                                                                                                                                                                                                                                                                                                                                                                                                                                                                                                                                                                                                                                                                                                                                                                                                                                                                                                                                                                                                                                                                                                                                                                                                                                                                                                                                                                                                                                                                                                                                                                                                                                                                                                                                                                                                                                                                                                                                                                                                                                                                                                                                                                                                                                                                                                                                                                                                                                                                                                                                                                                                                                                                                                                                                                                                                                                                                                                                                                                                                                                                                                                                                                                                                                                                                                                                                                                                                                                                                                                                                                                                                                                                                                                                                                                                                                                                                                                                                                                                                                                                                                                                                                                                                                                                                                                                                                                                                                                                                                                                                                                                                                                                                                                                                                                                                                                                                                                                                                                                                                                                                                                                                         |
|-------------------------------|----------|----|--------------------------------------------------------------------------------------------------------------------------------------------------------------------------------------------------------------------------------------------------------------------------------------------------------------------------------------------------------------------------------------------------------------------------------------------------------------------------------------------------------------------------------------------------------------------------------------------------------------------------------------------------------------------------------------------------------------------------------------------------------------------------------------------------------------------------------------------------------------------------------------------------------------|--------------------------------------------------------------------------------------|-------------------------------------------------------------------------------------------------------------------------------------------------------------------------------------------------------------------------------------------------------------------------------------------------------------------------------------------------------------------------------------------------------------------------------------------------------------------------------------------------------------------------------------------------------------------------------------------------------------------------------------------------------------------------------------------------------------------------------------------------------------------------------------------------------------------------------------------------------------------------------------------------------------------------------------------------------------------------------------------------------------------------------------------------------------------------------------------------------------------------------------------------------------------------------------------------------------------------------------------------------------------------------------------------------------------------------------------------------------------------------------------------------------------------------------------------------------------------------------------------------------------------------------------------------------------------------------------------------------------------------------------------------------------------------------------------------------------------------------------------------------------------------------------------------------------------------------------------------------------------------------------------------------------------------------------------------------------------------------------------------------------------------------------------------------------------------------------------------------------------------------------------------------------------------------------------------------------------------------------------------------------------------------------------------------------------------------------------------------------------------------------------------------------------------------------------------------------------------------------------------------------------------------------------------------------------------------------------------------------------------------------------------------------------------------------------------------------------------------------------------------------------------------------------------------------------------------------------------------------------------------------------------------------------------------------------------------------------------------------------------------------------------------------------------------------------------------------------------------------------------------------------------------------------------------------------------------------------------------------------------------------------------------------------------------------------------------------------------------------------------------------------------------------------------------------------------------------------------------------------------------------------------------------------------------------------------------------------------------------------------------------------------------------------------------------------------------------------------------------------------------------------------------------------------------------------------------------------------------------------------------------------------------------------------------------------------------------------------------------------------------------------------------------------------------------------------------------------------------------------------------------------------------------------------------------------------------------------------------------------------------------------------------------------------------------------------------------------------------------------------------------------------------------------------------------------------------------------------------------------------------------------------------------------------------------------------------------------------------------------------------------------------------------------------------------------------------------------------------------------------------------------------------------------------------------------------------------------------------------------------------------------------------------------------------------------------------------------------------------------------------------------------------------------------------------------------------------------------------------------------------------------------------------------------------------------------------------------------------------------------------------------------------------------------------------------------------------------------------------------------------------------------------------------------------------------------------------------------------------------------------------------------------------------------------------------------------------------------------------------------------------------------------------------------------------------------------------------------------------------------------------------------------------------------------------------------------------------------------------------------------------------------------------------------------------------------------------------------------------------------------------------------------------------------------------------------------------------------------------------------------------------------------------------------------------------------------------------------------------------------------------------------------------------------------------------------------------------------------------------------------------------------------------------------------------------------------------------------------------------------------------------------------------------------------------------------------------------------------------------------------------------------------------------------------------------------------------------------------------------------------------------------------------------------------------------------------------------------------------------------------------------------------------------------------------------------------------------------------------------------------------------------------------------------------------------------------------------------------------------|
| Starch and sucrose metabolism | map00500 | 25 | <p>ec:2.7.1.106 - synthase, ec:3.2.1.4 - endo-1,4-beta-D-glucanase, ec:3.2.1.3 - 1,4-alpha-glucosidase, ec:3.2.1.2 - saccharogen amylase, ec:3.2.1.1 - glycogenase, ec:3.2.1.68 - debranching enzyme, ec:5.3.1.9 - isomerase, ec:3.2.1.58 - 1,3-beta-glucosidase, ec:3.2.1.91 - 1,4-beta-cellobiosidase (non-reducing end), ec:3.2.1.20 - maltase, ec:3.2.1.21 - gentiobiase, ec:2.4.1.34 - synthase, ec:3.2.1.28 - trehalase, ec:3.2.1.39 - endo-1,3-beta-D-glucosidase, ec:2.4.1.1 - phosphorylase, ec:2.4.1.18 - branching enzyme, ec:2.4.1.15 - synthase (UDP-forming), ec:2.4.1.21 - synthase (glycosyl-transferring), ec:3.6.1.9 - diphosphatase, ec:2.7.1.2 - diphosphatase (phosphorylating), ec:3.1.3.12 - trehalose 6-phosphatase, ec:3.6.1.21 - diphosphatase, ec:2.7.7.9 - uridylyltransferase, ec:5.4.2.2 - (alpha-D-glucose-1,6-bisphosphate-dependent), ec:5.4.2.6 - beta-pgm (gene name)</p> | <p>1, 11, 1, 4, 7, 2, 2, 4, 47, 1, 1, 2, 2, 3, 3, 7, 2, 12, 7, 2, 2, 5, 10, 7, 2</p> | <p>vo_c2_Locus_23037_Transcript_1/2_Confidence_0.750_Length_1965, vo_n1_Locus_3997_Transcript_24/86_Confidence_0.037_Length_866, tri_c_comp21238_c0_seq2, vo_n2_Locus_3_Transcript_20185/24291_Confidence_0.000_Length_2632, vo_n2_Locus_3_Transcript_20192/24291_Confidence_0.000_Length_2788, vo_n1_Locus_3997_Transcript_14/86_Confidence_0.162_Length_2014, vo_n1_Locus_3997_Transcript_82/86_Confidence_0.143_Length_9458, vo_c2_Locus_1527_Transcript_36/36_Confidence_0.072_Length_913, vo_c2_Locus_1527_Transcript_18/36_Confidence_0.234_Length_2293, vo_n1_Locus_3997_Transcript_29/86_Confidence_0.092_Length_2830, vo_c1_Locus_276_Transcript_20/22_Confidence_0.068_Length_2129, vo_n1_Locus_3997_Transcript_22/86_Confidence_0.007_Length_1222, vo_c2_Locus_14395_Transcript_1/1_Confidence_0.000_Length_3374, vo_n1_Locus_14414_Transcript_1/2_Confidence_0.833_Length_1154, vo_n2_Locus_37776_Transcript_1/1_Confidence_0.000_Length_675, vo_n3_Locus_23299_Transcript_1/2_Confidence_0.667_Length_2577, tri_c_comp21076_c0_seq5, vo_c1_Locus_4524_Transcript_1/3_Confidence_0.600_Length_3012, vo_n1_Locus_6549_Transcript_2/6_Confidence_0.643_Length_4768, vo_n1_Locus_6549_Transcript_6/6_Confidence_0.214_Length_4881, vo_n1_Locus_3507_Transcript_2/3_Confidence_0.400_Length_3947, vo_c1_Locus_16465_Transcript_1/1_Confidence_0.000_Length_2200, tri_n_comp5289_c0_seq1, vo_n1_Locus_986_Transcript_27/36_Confidence_0.155_Length_9490, tri_c_comp28455_c0_seq1, tri_n_comp30681_c0_seq1, vo_n2_Locus_11241_Transcript_1/3_Confidence_0.600_Length_3773, vo_c2_Locus_479_Transcript_1/2_Confidence_1.000_Length_2154, tri_c_comp12867_c0_seq1, tri_n_comp70995_c0_seq1, vo_c3_Locus_4852_Transcript_3/3_Confidence_0.000_Length_806, vo_c1_Locus_788_Transcript_9/34_Confidence_0.021_Length_747, vo_c3_Locus_147_Transcript_27/36_Confidence_0.385_Length_3809, vo_n1_Locus_11315_Transcript_44/46_Confidence_0.376_Length_3978, vo_n2_Locus_174_Transcript_26/35_Confidence_0.385_Length_3142, vo_c3_Locus_147_Transcript_15/36_Confidence_0.429_Length_3820, vo_n2_Locus_174_Transcript_9/35_Confidence_0.319_Length_3595, vo_c3_Locus_147_Transcript_24/36_Confidence_0.407_Length_4120, vo_n3_Locus_223_Transcript_35/39_Confidence_0.222_Length_2437, tri_c_comp21238_c0_seq2, vo_n2_Locus_3_Transcript_20185/24291_Confidence_0.000_Length_2632, vo_c3_Locus_10908_Transcript_16/18_Confidence_0.333_Length_2326, vo_n1_Locus_1202_Transcript_20/44_Confidence_0.398_Length_3502, vo_c3_Locus_147_Transcript_13/36_Confidence_0.429_Length_3782, vo_c3_Locus_147_Transcript_23/36_Confidence_0.363_Length_3964, vo_c1_Locus_1050_Transcript_45/49_Confidence_0.390_Length_3244, vo_c3_Locus_147_Transcript_11/36_Confidence_0.440_Length_3299, vo_n3_Locus_223_Transcript_18/39_Confidence_0.489_Length_2944, vo_n1_Locus_3997_Transcript_24/86_Confidence_0.037_Length_866, vo_n3_Locus_14056_Transcript_23/30_Confidence_0.484_Length_3994, vo_c2_Locus_3916_Transcript_32/38_Confidence_0.391_Length_3924, vo_n1_Locus_11315_Transcript_40/46_Confidence_0.387_Length_3974, vo_n1_Locus_3997_Transcript_14/86_Confidence_0.162_Length_2014, vo_n1_Locus_3997_Transcript_82/86_Confidence_0.143_Length_9458, vo_c2_Locus_3916_Transcript_35/38_Confidence_0.379_Length_3853, vo_n3_Locus_223_Transcript_11/39_Confidence_0.333_Length_2788, vo_n1_Locus_1202_Transcript_40/44_Confidence_0.482_Length_3789, vo_c2_Locus_3916_Transcript_25/38_Confidence_0.460_Length_4104, vo_n1_Locus_1202_Transcript_4/44_Confidence_0.301_Length_2245, vo_n1_Locus_3997_Transcript_29/86_Confidence_0.092_Length_2830, vo_n1_Locus_3997_Transcript_22/86_Confidence_0.007_Length_1222, vo_n2_Locus_174_Transcript_3/35_Confidence_0.099_Length_2501, vo_n1_Locus_1202_Transcript_41/44_Confidence_0.482_Length_3746, vo_n2_Locus_3_Transcript_20192/24291_Confidence_0.000_Length_2788, vo_n1_Locus_1050_Transcript_34/49_Confidence_0.390_Length_3322, vo_c1_Locus_1050_Transcript_4/49_Confidence_0.317_Length_2768, vo_n1_Locus_1202_Transcript_34/44_Confidence_0.386_Length_3186, vo_n2_Locus_174_Transcript_25/35_Confidence_0.363_Length_3321, vo_c2_Locus_1527_Transcript_36/36_Confidence_0.072_Length_913, vo_c2_Locus_3916_Transcript_23/38_Confidence_0.460_Length_4069, vo_n1_Locus_1202_Transcript_21/44_Confidence_0.301_Length_2911, vo_c1_Locus_1050_Transcript_29/49_Confidence_0.329_Length_3265, vo_c1_Locus_21512_Transcript_13/13_Confidence_0.170_Length_812, vo_c2_Locus_1527_Transcript_18/36_Confidence_0.234_Length_2293, vo_c3_Locus_147_Transcript_5/36_Confidence_0.275_Length_2545, vo_n1_Locus_11315_Transcript_31/46_Confidence_0.398_Length_3986, vo_n3_Locus_223_Transcript_29/39_Confidence_0.256_Length_2902, vo_c1_Locus_276_Transcript_20/22_Confidence_0.068_Length_2129, vo_c2_Locus_3916_Transcript_38/38_Confidence_0.184_Length_4071, vo_n2_Locus_3872_Transcript_1/1_Confidence_0.000_Length_2389, vo_c2_Locus_13105_Transcript_1/1_Confidence_0.000_Length_2797, vo_n2_Locus_11990_Transcript_1/1_Confidence_0.000_Length_7576, vo_n2_Locus_1515_Transcript_20/24_Confidence_0.103_Length_4140, vo_c1_Locus_7595_Transcript_2/2_Confidence_0.000_Length_2004, vo_n1_Locus_29249_Transcript_2/2_Confidence_0.250_Length_2011, tri_c_comp12867_c0_seq1, tri_n_comp70995_c0_seq1, vo_c3_Locus_32079_Transcript_2/2_Confidence_0.250_Length_2113, vo_n1_Locus_20275_Transcript_1/1_Confidence_0.000_Length_2621, vo_n2_Locus_1397_Transcript_7/15_Confidence_0.091_Length_5840, vo_n2_Locus_618_Transcript_2/13_Confidence_0.167_Length_2515, vo_c1_Locus_5279_Transcript_4/8_Confidence_0.600_Length_6117, vo_c3_Locus_6753_Transcript_5/9_Confidence_0.467_Length_6108, vo_n3_Locus_734_Transcript_1/5_Confidence_0.375_Length_3606, tri_c_comp42932_c0_seq1, vo_c3_Locus_6753_Transcript_8/9_Confidence_0.200_Length_3716, vo_c1_Locus_7002_Transcript_5/7_Confidence_0.462_Length_4257, vo_c3_Locus_7490_Transcript_1/4_Confidence_0.667_Length_2130, vo_c1_Locus_18692_Transcript_18/20_Confidence_0.455_Length_4000, vo_n2_Locus_17428_Transcript_1/1_Confidence_0.000_Length_3307, vo_c2_Locus_262_Transcript_3/36_Confidence_0.143_Length_2398, vo_c2_Locus_262_Transcript_5/36_Confidence_0.365_Length_2514, vo_n3_Locus_734_Transcript_1/5_Confidence_0.375_Length_3606, vo_c2_Locus_12549_Transcript_1/1_Confidence_0.000_Length_2428, vo_c2_Locus_6067_Transcript_7/10_Confidence_0.235_Length_1527, vo_c3_Locus_6753_Transcript_8/9_Confidence_0.200_Length_3716, vo_c2_Locus_6067_Transcript_9/10_Confidence_0.176_Length_1493, vo_n2_Locus_3675_Transcript_3/4_Confidence_0.167_Length_2615, tri_c_comp21252_c0_seq24, vo_c2_Locus_5836_Transcript_6/6_Confidence_0.400_Length_2597, vo_n3_Locus_600_Transcript_20/32_Confidence_0.426_Length_2952, vo_c2_Locus_262_Transcript_4/36_Confidence_0.302_Length_2651, vo_c2_Locus_35825_Transcript_1/2_Confidence_0.500_Length_995, vo_c2_Locus_35825_Transcript_2/2_Confidence_0.000_Length_972, tri_n_comp34093_c0_seq1, vo_c2_Locus_11939_Transcript_1/4_Confidence_0.273_Length_1336,</p> |
|-------------------------------|----------|----|--------------------------------------------------------------------------------------------------------------------------------------------------------------------------------------------------------------------------------------------------------------------------------------------------------------------------------------------------------------------------------------------------------------------------------------------------------------------------------------------------------------------------------------------------------------------------------------------------------------------------------------------------------------------------------------------------------------------------------------------------------------------------------------------------------------------------------------------------------------------------------------------------------------|--------------------------------------------------------------------------------------|-------------------------------------------------------------------------------------------------------------------------------------------------------------------------------------------------------------------------------------------------------------------------------------------------------------------------------------------------------------------------------------------------------------------------------------------------------------------------------------------------------------------------------------------------------------------------------------------------------------------------------------------------------------------------------------------------------------------------------------------------------------------------------------------------------------------------------------------------------------------------------------------------------------------------------------------------------------------------------------------------------------------------------------------------------------------------------------------------------------------------------------------------------------------------------------------------------------------------------------------------------------------------------------------------------------------------------------------------------------------------------------------------------------------------------------------------------------------------------------------------------------------------------------------------------------------------------------------------------------------------------------------------------------------------------------------------------------------------------------------------------------------------------------------------------------------------------------------------------------------------------------------------------------------------------------------------------------------------------------------------------------------------------------------------------------------------------------------------------------------------------------------------------------------------------------------------------------------------------------------------------------------------------------------------------------------------------------------------------------------------------------------------------------------------------------------------------------------------------------------------------------------------------------------------------------------------------------------------------------------------------------------------------------------------------------------------------------------------------------------------------------------------------------------------------------------------------------------------------------------------------------------------------------------------------------------------------------------------------------------------------------------------------------------------------------------------------------------------------------------------------------------------------------------------------------------------------------------------------------------------------------------------------------------------------------------------------------------------------------------------------------------------------------------------------------------------------------------------------------------------------------------------------------------------------------------------------------------------------------------------------------------------------------------------------------------------------------------------------------------------------------------------------------------------------------------------------------------------------------------------------------------------------------------------------------------------------------------------------------------------------------------------------------------------------------------------------------------------------------------------------------------------------------------------------------------------------------------------------------------------------------------------------------------------------------------------------------------------------------------------------------------------------------------------------------------------------------------------------------------------------------------------------------------------------------------------------------------------------------------------------------------------------------------------------------------------------------------------------------------------------------------------------------------------------------------------------------------------------------------------------------------------------------------------------------------------------------------------------------------------------------------------------------------------------------------------------------------------------------------------------------------------------------------------------------------------------------------------------------------------------------------------------------------------------------------------------------------------------------------------------------------------------------------------------------------------------------------------------------------------------------------------------------------------------------------------------------------------------------------------------------------------------------------------------------------------------------------------------------------------------------------------------------------------------------------------------------------------------------------------------------------------------------------------------------------------------------------------------------------------------------------------------------------------------------------------------------------------------------------------------------------------------------------------------------------------------------------------------------------------------------------------------------------------------------------------------------------------------------------------------------------------------------------------------------------------------------------------------------------------------------------------------------------------------------------------------------------------------------------------------------------------------------------------------------------------------------------------------------------------------------------------------------------------------------------------------------------------------------------------------------------------------------------------------------------------------------------------------------------------------------------------------------------------------------------------------------------------------------------------|

|  |  |  |  |  |                                                                                                                                                                                                                                                                                                                                                                                                                                                                                                                                                                                                                                                                                                                                                                                                                                                                                                                                                                                                                                                                                                                                                                                                                                                                                                                                                                                                                                                                                                                                                                                                                                                                                                                                                                                          |
|--|--|--|--|--|------------------------------------------------------------------------------------------------------------------------------------------------------------------------------------------------------------------------------------------------------------------------------------------------------------------------------------------------------------------------------------------------------------------------------------------------------------------------------------------------------------------------------------------------------------------------------------------------------------------------------------------------------------------------------------------------------------------------------------------------------------------------------------------------------------------------------------------------------------------------------------------------------------------------------------------------------------------------------------------------------------------------------------------------------------------------------------------------------------------------------------------------------------------------------------------------------------------------------------------------------------------------------------------------------------------------------------------------------------------------------------------------------------------------------------------------------------------------------------------------------------------------------------------------------------------------------------------------------------------------------------------------------------------------------------------------------------------------------------------------------------------------------------------|
|  |  |  |  |  | <p>vo_c1_Locus_18906_Transcript_3/4_Confidence_0.400_Length_1298, vo_c2_Locus_26280_Transcript_1/1_Confidence_0.000_Length_1316, vo_c1_Locus_31652_Transcript_2/3_Confidence_0.429_Length_964, tri_c_comp10536_c0_seq1, vo_c2_Locus_32726_Transcript_2/2_Confidence_0.000_Length_696, vo_c1_Locus_18692_Transcript_18/20_Confidence_0.455_Length_4000, vo_n2_Locus_17428_Transcript_1/1_Confidence_0.000_Length_3307, vo_c2_Locus_35825_Transcript_1/2_Confidence_0.500_Length_995, vo_c2_Locus_35825_Transcript_2/2_Confidence_0.000_Length_972, vo_c1_Locus_18906_Transcript_3/4_Confidence_0.400_Length_1298, tri_n_comp34093_c0_seq1, vo_c2_Locus_11939_Transcript_1/4_Confidence_0.273_Length_1336, vo_n1_Locus_14248_Transcript_2/11_Confidence_0.333_Length_688, vo_c1_Locus_21075_Transcript_1/3_Confidence_0.500_Length_1034, vo_c2_Locus_2206_Transcript_1/2_Confidence_1.000_Length_1671, tri_c_comp13085_c0_seq3, tri_c_comp54583_c0_seq1, vo_c2_Locus_2427_Transcript_3/6_Confidence_0.455_Length_1530, vo_n2_Locus_12563_Transcript_1/1_Confidence_0.000_Length_1886, vo_n2_Locus_6619_Transcript_2/3_Confidence_0.571_Length_1613, vo_n1_Locus_3509_Transcript_2/2_Confidence_0.000_Length_1894, vo_n1_Locus_14248_Transcript_5/11_Confidence_0.222_Length_1040, tri_n_comp18813_c0_seq13, vo_c2_Locus_23037_Transcript_2/2_Confidence_0.000_Length_2109, vo_n3_Locus_362_Transcript_3/4_Confidence_0.364_Length_3895, vo_n3_Locus_362_Transcript_1/4_Confidence_0.727_Length_3306, vo_n1_Locus_5208_Transcript_2/2_Confidence_0.000_Length_2077, vo_c2_Locus_23037_Transcript_1/2_Confidence_0.750_Length_1965, vo_n3_Locus_15336_Transcript_1/1_Confidence_0.000_Length_1810, vo_n2_Locus_19354_Transcript_2/2_Confidence_0.000_Length_489, tri_c_comp14768_c0_seq1</p> |
|--|--|--|--|--|------------------------------------------------------------------------------------------------------------------------------------------------------------------------------------------------------------------------------------------------------------------------------------------------------------------------------------------------------------------------------------------------------------------------------------------------------------------------------------------------------------------------------------------------------------------------------------------------------------------------------------------------------------------------------------------------------------------------------------------------------------------------------------------------------------------------------------------------------------------------------------------------------------------------------------------------------------------------------------------------------------------------------------------------------------------------------------------------------------------------------------------------------------------------------------------------------------------------------------------------------------------------------------------------------------------------------------------------------------------------------------------------------------------------------------------------------------------------------------------------------------------------------------------------------------------------------------------------------------------------------------------------------------------------------------------------------------------------------------------------------------------------------------------|

|                                          |          |    |                                                                                                                                                                                                                                                                                                                                                                                                                                                                                                                                                                                                                                                                                                                                                                                                                                          |                                                                                                         |                                                                                                                                                                                                                                                                                                                                                                                                                                                                                                                                                                                                                                                                                                                                                                                                                                                                                                                                                                                                                                                                                                                                                                                                                                                                                                                                                                                                                                                                                                                                                                                                                                                                                                                                                                                                                                                                                                                                                                                                                                                                                                                                                                                                                                                                                                                                                                                                                                                                                                                                                                                                                                                                                                                                                                                                                                                                                                                                                                                                                                                                                                                                                                                                                                                                                                                                                                                                                                                                                                                                                                                                                                                                                                                                                                                                                                                                                                                                                                                                                                                                                                                                                                                                                                                                                                                                                                                                                                                                                                                                                                                                                                                                                                                                        |
|------------------------------------------|----------|----|------------------------------------------------------------------------------------------------------------------------------------------------------------------------------------------------------------------------------------------------------------------------------------------------------------------------------------------------------------------------------------------------------------------------------------------------------------------------------------------------------------------------------------------------------------------------------------------------------------------------------------------------------------------------------------------------------------------------------------------------------------------------------------------------------------------------------------------|---------------------------------------------------------------------------------------------------------|----------------------------------------------------------------------------------------------------------------------------------------------------------------------------------------------------------------------------------------------------------------------------------------------------------------------------------------------------------------------------------------------------------------------------------------------------------------------------------------------------------------------------------------------------------------------------------------------------------------------------------------------------------------------------------------------------------------------------------------------------------------------------------------------------------------------------------------------------------------------------------------------------------------------------------------------------------------------------------------------------------------------------------------------------------------------------------------------------------------------------------------------------------------------------------------------------------------------------------------------------------------------------------------------------------------------------------------------------------------------------------------------------------------------------------------------------------------------------------------------------------------------------------------------------------------------------------------------------------------------------------------------------------------------------------------------------------------------------------------------------------------------------------------------------------------------------------------------------------------------------------------------------------------------------------------------------------------------------------------------------------------------------------------------------------------------------------------------------------------------------------------------------------------------------------------------------------------------------------------------------------------------------------------------------------------------------------------------------------------------------------------------------------------------------------------------------------------------------------------------------------------------------------------------------------------------------------------------------------------------------------------------------------------------------------------------------------------------------------------------------------------------------------------------------------------------------------------------------------------------------------------------------------------------------------------------------------------------------------------------------------------------------------------------------------------------------------------------------------------------------------------------------------------------------------------------------------------------------------------------------------------------------------------------------------------------------------------------------------------------------------------------------------------------------------------------------------------------------------------------------------------------------------------------------------------------------------------------------------------------------------------------------------------------------------------------------------------------------------------------------------------------------------------------------------------------------------------------------------------------------------------------------------------------------------------------------------------------------------------------------------------------------------------------------------------------------------------------------------------------------------------------------------------------------------------------------------------------------------------------------------------------------------------------------------------------------------------------------------------------------------------------------------------------------------------------------------------------------------------------------------------------------------------------------------------------------------------------------------------------------------------------------------------------------------------------------------------------------------------|
| Glycine, serine and threonine metabolism | map00260 | 24 | <p>ec:1.4.3.3 - oxidase,<br/> ec:2.6.1.52 - transaminase,<br/> ec:2.7.2.4 - kinase,<br/> ec:2.6.1.44 - transaminase,<br/> ec:1.1.1.103 - 3-dehydrogenase, ec:1.2.1.11 - dehydrogenase, ec:1.5.8.4 - dehydrogenase, ec:1.5.8.3 - dehydrogenase, ec:1.8.1.4 - dehydrogenase, ec:3.1.3.3 - phosphatase, ec:1.1.1.3 - dehydrogenase, ec:4.3.1.17 - ammonia-lyase, ec:4.3.1.18 - ammonia-lyase, ec:4.3.1.19 - ammonia-lyase, ec:1.2.1.8 - dehydrogenase, ec:4.4.1.1 - gamma-lyase, ec:1.1.99.1 - dehydrogenase, ec:2.1.2.1 - hydroxymethyltransferase, ec:1.4.4.2 - dehydrogenase (aminomethyl-transferring), ec:2.3.1.29 - C-acetyltransferase, ec:2.1.2.10 - S-aminomethylidihydropolypotein:(6S)-tetrahydrofolate aminomethyltransferase (ammonia-forming), ec:4.2.1.22 - beta-synthase, ec:4.2.1.20 - synthase, ec:1.4.3.21 - oxidase</p> | <p>1, 4, 7, 2,<br/> 10, 4, 1, 1,<br/> 2, 2, 1, 2,<br/> 2, 2, 1, 7,<br/> 2, 9, 3, 1,<br/> 9, 8, 2, 1</p> | <p>vo_n2_Locus_26350_Transcript_7/9_Confidence_0.231_Length_1309, vo_n2_Locus_2440_Transcript_3/6_Confidence_0.182_Length_1751, tri_c_comp24934_c0_seq1, vo_c3_Locus_9067_Transcript_6/7_Confidence_0.125_Length_1757, vo_c2_Locus_1886_Transcript_3/5_Confidence_0.444_Length_2764, vo_c1_Locus_1636_Transcript_120/122_Confidence_0.135_Length_3625, tri_n_comp29741_c0_seq1, vo_c3_Locus_31_Transcript_74/79_Confidence_0.124_Length_2769, vo_c2_Locus_10862_Transcript_1/1_Confidence_0.000_Length_1564, vo_c3_Locus_31_Transcript_63/79_Confidence_0.148_Length_3613, vo_c1_Locus_1636_Transcript_116/122_Confidence_0.129_Length_3526, vo_c2_Locus_52_Transcript_164/466_Confidence_0.011_Length_2810, vo_c3_Locus_33872_Transcript_1/1_Confidence_0.000_Length_1446, vo_c1_Locus_7220_Transcript_2/3_Confidence_0.400_Length_2898, vo_c2_Locus_7588_Transcript_12/16_Confidence_0.364_Length_3463, vo_n1_Locus_2728_Transcript_5/7_Confidence_0.143_Length_3965, vo_c3_Locus_217_Transcript_3/16_Confidence_0.360_Length_1567, vo_c2_Locus_7588_Transcript_10/16_Confidence_0.455_Length_4063, vo_c2_Locus_7588_Transcript_11/16_Confidence_0.318_Length_4206, vo_c2_Locus_7588_Transcript_6/16_Confidence_0.455_Length_4082, vo_c3_Locus_217_Transcript_4/16_Confidence_0.160_Length_468, vo_c2_Locus_7588_Transcript_14/16_Confidence_0.227_Length_3444, vo_c2_Locus_7588_Transcript_7/16_Confidence_0.455_Length_4225, vo_n3_Locus_18141_Transcript_3/4_Confidence_0.400_Length_4159, vo_n2_Locus_3068_Transcript_2/3_Confidence_0.250_Length_1991, vo_n1_Locus_4025_Transcript_3/5_Confidence_0.286_Length_3475, vo_c1_Locus_9004_Transcript_2/4_Confidence_0.400_Length_3537, vo_c1_Locus_10440_Transcript_1/2_Confidence_0.667_Length_1569, vo_c3_Locus_7605_Transcript_3/4_Confidence_0.250_Length_2875, tri_n_comp13806_c0_seq3, vo_n3_Locus_6810_Transcript_2/3_Confidence_0.913_Length_1699, vo_n1_Locus_6460_Transcript_1/1_Confidence_0.000_Length_1912, vo_c3_Locus_3840_Transcript_2/5_Confidence_0.200_Length_1699, vo_c2_Locus_27691_Transcript_1/2_Confidence_0.750_Length_923, vo_c2_Locus_10862_Transcript_1/1_Confidence_0.000_Length_1564, vo_c2_Locus_30746_Transcript_1/1_Confidence_0.000_Length_1279, vo_n1_Locus_2779_Transcript_1/2_Confidence_0.333_Length_2962, vo_c2_Locus_30746_Transcript_1/1_Confidence_0.000_Length_1279, vo_n1_Locus_2779_Transcript_1/2_Confidence_0.333_Length_2962, vo_c2_Locus_30746_Transcript_1/1_Confidence_0.000_Length_1279, tri_c_comp34117_c0_seq1, vo_c3_Locus_7280_Transcript_1/2_Confidence_0.667_Length_1614, tri_c_comp42317_c0_seq1, vo_n2_Locus_7374_Transcript_2/3_Confidence_0.750_Length_1746, vo_n2_Locus_8711_Transcript_5/5_Confidence_0.067_Length_1558, vo_c2_Locus_11984_Transcript_2/6_Confidence_0.385_Length_1557, vo_c2_Locus_31468_Transcript_4/5_Confidence_0.667_Length_1579, vo_n1_Locus_3498_Transcript_1/3_Confidence_0.600_Length_1462, tri_c_comp30049_c0_seq1, tri_n_comp26575_c0_seq1, tri_n_comp24797_c0_seq1, vo_c2_Locus_1465_Transcript_1/1_Confidence_0.000_Length_2684, vo_n2_Locus_668_Transcript_12/17_Confidence_0.465_Length_3343, vo_n3_Locus_1281_Transcript_13/14_Confidence_0.467_Length_2089, vo_n2_Locus_668_Transcript_10/17_Confidence_0.419_Length_1865, vo_c3_Locus_6604_Transcript_15/15_Confidence_0.590_Length_1792, vo_n3_Locus_1281_Transcript_3/14_Confidence_0.533_Length_1904, vo_c3_Locus_6604_Transcript_12/15_Confidence_0.230_Length_1729, tri_n_comp22443_c0_seq1, vo_c2_Locus_2191_Transcript_14/17_Confidence_0.464_Length_1841, vo_c3_Locus_6331_Transcript_3/4_Confidence_0.200_Length_905, tri_n_comp24631_c0_seq1, vo_c2_Locus_52_Transcript_237/466_Confidence_0.002_Length_590, tri_n_comp5199_c0_seq1, tri_c_comp25586_c0_seq1, vo_c2_Locus_23277_Transcript_1/1_Confidence_0.000_Length_1058, vo_n1_Locus_803_Transcript_2/31_Confidence_0.118_Length_2529, vo_n1_Locus_27713_Transcript_1/1_Confidence_0.000_Length_1034, tri_n_comp13806_c0_seq3, tri_c_comp13451_c0_seq2, vo_n1_Locus_803_Transcript_9/31_Confidence_0.324_Length_2360, vo_n2_Locus_3952_Transcript_1/2_Confidence_0.750_Length_1244, vo_n2_Locus_514_Transcript_37/44_Confidence_0.155_Length_1950, vo_n1_Locus_664_Transcript_3/4_Confidence_0.429_Length_1448, tri_n_comp16677_c0_seq4, vo_c1_Locus_1695_Transcript_1/2_Confidence_0.974_Length_1764, tri_n_comp16677_c0_seq1, tri_c_comp17806_c0_seq2, vo_c3_Locus_4013_Transcript_1/4_Confidence_0.625_Length_2457, vo_n2_Locus_211_Transcript_4/8_Confidence_0.400_Length_1517, vo_c2_Locus_615_Transcript_1/2_Confidence_0.400_Length_2717, tri_c_comp44055_c0_seq1, vo_c1_Locus_8760_Transcript_1/1_Confidence_0.000_Length_2415, tri_n_comp48625_c0_seq1</p> |
|------------------------------------------|----------|----|------------------------------------------------------------------------------------------------------------------------------------------------------------------------------------------------------------------------------------------------------------------------------------------------------------------------------------------------------------------------------------------------------------------------------------------------------------------------------------------------------------------------------------------------------------------------------------------------------------------------------------------------------------------------------------------------------------------------------------------------------------------------------------------------------------------------------------------|---------------------------------------------------------------------------------------------------------|----------------------------------------------------------------------------------------------------------------------------------------------------------------------------------------------------------------------------------------------------------------------------------------------------------------------------------------------------------------------------------------------------------------------------------------------------------------------------------------------------------------------------------------------------------------------------------------------------------------------------------------------------------------------------------------------------------------------------------------------------------------------------------------------------------------------------------------------------------------------------------------------------------------------------------------------------------------------------------------------------------------------------------------------------------------------------------------------------------------------------------------------------------------------------------------------------------------------------------------------------------------------------------------------------------------------------------------------------------------------------------------------------------------------------------------------------------------------------------------------------------------------------------------------------------------------------------------------------------------------------------------------------------------------------------------------------------------------------------------------------------------------------------------------------------------------------------------------------------------------------------------------------------------------------------------------------------------------------------------------------------------------------------------------------------------------------------------------------------------------------------------------------------------------------------------------------------------------------------------------------------------------------------------------------------------------------------------------------------------------------------------------------------------------------------------------------------------------------------------------------------------------------------------------------------------------------------------------------------------------------------------------------------------------------------------------------------------------------------------------------------------------------------------------------------------------------------------------------------------------------------------------------------------------------------------------------------------------------------------------------------------------------------------------------------------------------------------------------------------------------------------------------------------------------------------------------------------------------------------------------------------------------------------------------------------------------------------------------------------------------------------------------------------------------------------------------------------------------------------------------------------------------------------------------------------------------------------------------------------------------------------------------------------------------------------------------------------------------------------------------------------------------------------------------------------------------------------------------------------------------------------------------------------------------------------------------------------------------------------------------------------------------------------------------------------------------------------------------------------------------------------------------------------------------------------------------------------------------------------------------------------------------------------------------------------------------------------------------------------------------------------------------------------------------------------------------------------------------------------------------------------------------------------------------------------------------------------------------------------------------------------------------------------------------------------------------------------------------------------|

|                       |          |    |                                                                                                                                                                                                                                                                                                                                                                                                                                                                                                                                                                                                                                                                                         |                                                                         |                                                                                                                                                                                                                                                                                                                                                                                                                                                                                                                                                                                                                                                                                                                                                                                                                                                                                                                                                                                                                                                                                                                                                                                                                                                                                                                                                                                                                                                                                                                                                                                                                                                                                                                                                                                                                                                                                                                                                                                                                                                                                                                                                                                                                                                                                                                                                                                                                                                                                                                                                                                                                                                                                                                                                                                                                                                                                                                                                                                                                                                                                                                                                                                                                                                                                                                                                                                                                                                                                                                                                                                                                                                                                                                                                                                                                                                                                                                                                                                                                                                                                                                                                                                                                                                                                                                                                                                                                                                                                                                                                                                                                                                                                                                                                                                                                                                                                                                                                                                                                                                                                                                                                                                                                                                                                                                                                                                                                                                                                                                                                                                                                                                                                                                                                                                                                                                                                                                                                                                                                                                                                                                                                                                                                                                                                                                                                                                                                                                                                                                                                                                                                                                                                                                                                                                                                                                                                                                        |
|-----------------------|----------|----|-----------------------------------------------------------------------------------------------------------------------------------------------------------------------------------------------------------------------------------------------------------------------------------------------------------------------------------------------------------------------------------------------------------------------------------------------------------------------------------------------------------------------------------------------------------------------------------------------------------------------------------------------------------------------------------------|-------------------------------------------------------------------------|------------------------------------------------------------------------------------------------------------------------------------------------------------------------------------------------------------------------------------------------------------------------------------------------------------------------------------------------------------------------------------------------------------------------------------------------------------------------------------------------------------------------------------------------------------------------------------------------------------------------------------------------------------------------------------------------------------------------------------------------------------------------------------------------------------------------------------------------------------------------------------------------------------------------------------------------------------------------------------------------------------------------------------------------------------------------------------------------------------------------------------------------------------------------------------------------------------------------------------------------------------------------------------------------------------------------------------------------------------------------------------------------------------------------------------------------------------------------------------------------------------------------------------------------------------------------------------------------------------------------------------------------------------------------------------------------------------------------------------------------------------------------------------------------------------------------------------------------------------------------------------------------------------------------------------------------------------------------------------------------------------------------------------------------------------------------------------------------------------------------------------------------------------------------------------------------------------------------------------------------------------------------------------------------------------------------------------------------------------------------------------------------------------------------------------------------------------------------------------------------------------------------------------------------------------------------------------------------------------------------------------------------------------------------------------------------------------------------------------------------------------------------------------------------------------------------------------------------------------------------------------------------------------------------------------------------------------------------------------------------------------------------------------------------------------------------------------------------------------------------------------------------------------------------------------------------------------------------------------------------------------------------------------------------------------------------------------------------------------------------------------------------------------------------------------------------------------------------------------------------------------------------------------------------------------------------------------------------------------------------------------------------------------------------------------------------------------------------------------------------------------------------------------------------------------------------------------------------------------------------------------------------------------------------------------------------------------------------------------------------------------------------------------------------------------------------------------------------------------------------------------------------------------------------------------------------------------------------------------------------------------------------------------------------------------------------------------------------------------------------------------------------------------------------------------------------------------------------------------------------------------------------------------------------------------------------------------------------------------------------------------------------------------------------------------------------------------------------------------------------------------------------------------------------------------------------------------------------------------------------------------------------------------------------------------------------------------------------------------------------------------------------------------------------------------------------------------------------------------------------------------------------------------------------------------------------------------------------------------------------------------------------------------------------------------------------------------------------------------------------------------------------------------------------------------------------------------------------------------------------------------------------------------------------------------------------------------------------------------------------------------------------------------------------------------------------------------------------------------------------------------------------------------------------------------------------------------------------------------------------------------------------------------------------------------------------------------------------------------------------------------------------------------------------------------------------------------------------------------------------------------------------------------------------------------------------------------------------------------------------------------------------------------------------------------------------------------------------------------------------------------------------------------------------------------------------------------------------------------------------------------------------------------------------------------------------------------------------------------------------------------------------------------------------------------------------------------------------------------------------------------------------------------------------------------------------------------------------------------------------------------------------------------------------|
| Pyrimidine metabolism | map00240 | 22 | <p>ec:2.7.4.6 - kinase,<br/> ec:3.5.2.3 - carbamoylaspartic dehydrase, ec:2.7.4.9 - kinase, ec:2.7.1.48 - kinase, ec:2.1.3.2 - carbamoyltransferase, ec:4.2.1.70 - synthase, ec:3.1.3.5 - uridine 5'-nucleotidase, ec:6.3.5.5 - synthase (glutamine-hydrolysing), ec:6.3.4.2 - synthase (glutamine hydrolysing), ec:3.6.1.6 - diphosphate phosphatase, ec:3.6.1.8 - diphosphatase, ec:3.6.1.9 - diphosphatase, ec:1.17.4.1 - reductase, ec:3.6.1.23 - diphosphatase, ec:2.7.7.6 - RNA polymerase, ec:2.7.7.7 - DNA polymerase, ec:2.4.2.10 - phosphoribosyltransferase, ec:3.5.4.12 - deaminase, ec:2.7.4.22 - kinase, ec:2.4.2.9 - phosphoribosyltransferase, ec:2.7.4.14 - kinase</p> | 20, 4, 4, 10, 3, 1, 5, 11, 2, 1, 7, 1, 7, 32, 1, 24, 30, 1, 1, 8, 2, 16 | <p>vo_c1_Locus_13409_Transcript_2/6_Confidence_0.286_Length_871, vo_c3_Locus_2169_Transcript_1/3_Confidence_0.167_Length_848, vo_n2_Locus_739_Transcript_8/8_Confidence_0.167_Length_1338, vo_n3_Locus_4095_Transcript_2/3_Confidence_0.444_Length_3401, vo_c1_Locus_12423_Transcript_2/2_Confidence_0.333_Length_980, vo_c1_Locus_25242_Transcript_1/1_Confidence_0.000_Length_1465, vo_c1_Locus_4920_Transcript_1/2_Confidence_0.714_Length_1520, tri_c_comp49412_c0_seq1, vo_n2_Locus_5279_Transcript_1/1_Confidence_0.333_Length_2493, vo_n2_Locus_20723_Transcript_1/1_Confidence_0.000_Length_1179, vo_n3_Locus_24634_Transcript_1/1_Confidence_0.000_Length_445, vo_n1_Locus_5513_Transcript_4/4_Confidence_0.286_Length_1053, tri_c_comp24673_c0_seq1, tri_c_comp5012_c0_seq2, vo_c3_Locus_3080_Transcript_1/28_Confidence_0.009_Length_1584, vo_n1_Locus_9563_Transcript_1/1_Confidence_0.000_Length_1437, vo_n2_Locus_26604_Transcript_1/2_Confidence_0.750_Length_1361, vo_n2_Locus_2689_Transcript_2/2_Confidence_0.000_Length_2612, vo_c2_Locus_4541_Transcript_2/6_Confidence_0.571_Length_909, vo_n2_Locus_26604_Transcript_2/2_Confidence_0.000_Length_1685, vo_c2_Locus_11816_Transcript_2/2_Confidence_0.250_Length_1509, vo_n1_Locus_6422_Transcript_1/1_Confidence_0.000_Length_1398, tri_c_comp33901_c0_seq1, vo_n2_Locus_5805_Transcript_1/2_Confidence_0.333_Length_5227, vo_n2_Locus_7391_Transcript_1/1_Confidence_0.000_Length_1253, vo_n1_Locus_18221_Transcript_2/3_Confidence_0.333_Length_2330, tri_n_comp29271_c0_seq1, tri_c_comp39328_c0_seq1, vo_n1_Locus_27053_Transcript_1/1_Confidence_0.333_Length_1866, vo_n2_Locus_1685_Transcript_1/2_Confidence_0.667_Length_854, vo_n1_Locus_1829_Transcript_14/31_Confidence_0.635_Length_1771, vo_n1_Locus_1829_Transcript_24/31_Confidence_0.558_Length_1469, vo_c3_Locus_527_Transcript_60/87_Confidence_0.092_Length_2707, vo_n1_Locus_1829_Transcript_21/31_Confidence_0.519_Length_1458, vo_c1_Locus_12423_Transcript_2/2_Confidence_0.333_Length_980, vo_n2_Locus_26604_Transcript_1/2_Confidence_0.750_Length_1361, vo_n1_Locus_1829_Transcript_31/31_Confidence_0.269_Length_1123, vo_n2_Locus_26604_Transcript_2/2_Confidence_0.000_Length_1685, tri_n_comp27462_c0_seq1, tri_c_comp33901_c0_seq1, vo_n2_Locus_5805_Transcript_1/2_Confidence_0.333_Length_5227, tri_c_comp27551_c0_seq1, tri_c_comp11590_c0_seq1, vo_c3_Locus_15578_Transcript_2/4_Confidence_0.722_Length_967, vo_c1_Locus_6843_Transcript_1/2_Confidence_0.833_Length_813, vo_c2_Locus_1969_Transcript_1/2_Confidence_0.200_Length_1807, vo_c1_Locus_6843_Transcript_2/2_Confidence_0.167_Length_995, vo_c1_Locus_21072_Transcript_1/1_Confidence_0.000_Length_965, vo_c2_Locus_25862_Transcript_4/4_Confidence_0.000_Length_988, vo_c2_Locus_26482_Transcript_5/6_Confidence_0.286_Length_1654, vo_c2_Locus_26482_Transcript_4/6_Confidence_0.571_Length_1609, vo_n2_Locus_21191_Transcript_4/6_Confidence_0.300_Length_1691, vo_c1_Locus_18480_Transcript_2/2_Confidence_0.000_Length_1013, vo_c2_Locus_27118_Transcript_12/49_Confidence_0.025_Length_3122, vo_c2_Locus_6520_Transcript_5/15_Confidence_0.455_Length_1419, vo_c3_Locus_7168_Transcript_5/8_Confidence_0.538_Length_1343, vo_n1_Locus_7057_Transcript_3/15_Confidence_0.611_Length_1294, vo_n2_Locus_21191_Transcript_3/6_Confidence_0.500_Length_1646, tri_c_comp33901_c0_seq1, vo_n2_Locus_5805_Transcript_1/2_Confidence_0.333_Length_5227, vo_c3_Locus_13321_Transcript_1/2_Confidence_0.500_Length_4253, vo_c3_Locus_32274_Transcript_3/4_Confidence_0.333_Length_1761, vo_c3_Locus_32274_Transcript_4/4_Confidence_0.111_Length_782, tri_c_comp8863_c0_seq2, tri_c_comp31434_c0_seq1, vo_n1_Locus_11021_Transcript_1/1_Confidence_0.000_Length_1895, vo_c1_Locus_16918_Transcript_2/2_Confidence_0.000_Length_1637, vo_n2_Locus_15575_Transcript_2/4_Confidence_0.714_Length_1610, tri_c_comp4030_c0_seq1, vo_c2_Locus_35825_Transcript_1/2_Confidence_0.500_Length_995, vo_c2_Locus_35825_Transcript_2/2_Confidence_0.000_Length_972, tri_n_comp34093_c0_seq1, vo_c2_Locus_11939_Transcript_1/4_Confidence_0.273_Length_1336, vo_c1_Locus_18906_Transcript_3/4_Confidence_0.400_Length_1298, vo_c2_Locus_26280_Transcript_1/1_Confidence_0.000_Length_1316, vo_c1_Locus_31652_Transcript_2/3_Confidence_0.429_Length_964, vo_c3_Locus_2584_Transcript_3/5_Confidence_0.727_Length_2680, vo_c3_Locus_2584_Transcript_5/5_Confidence_0.500_Length_3685, vo_c1_Locus_2715_Transcript_9/14_Confidence_0.429_Length_1359, vo_c1_Locus_2066_Transcript_3/17_Confidence_0.415_Length_3989, vo_c3_Locus_4226_Transcript_1/2_Confidence_1.000_Length_2714, vo_c1_Locus_10489_Transcript_1/1_Confidence_0.000_Length_1447, vo_c2_Locus_80_Transcript_8/10_Confidence_0.310_Length_2635, vo_c1_Locus_2066_Transcript_16/17_Confidence_0.293_Length_2774, vo_n1_Locus_4390_Transcript_2/5_Confidence_0.333_Length_2677, vo_n1_Locus_4390_Transcript_3/5_Confidence_0.600_Length_2659, vo_n2_Locus_2860_Transcript_3/6_Confidence_0.250_Length_3111, vo_n1_Locus_2992_Transcript_5/14_Confidence_0.476_Length_1500, vo_n2_Locus_294_Transcript_20/20_Confidence_0.167_Length_2119, vo_c3_Locus_3000_Transcript_12/15_Confidence_0.407_Length_1288, vo_c2_Locus_5247_Transcript_3/7_Confidence_0.500_Length_1443, vo_n1_Locus_357_Transcript_3/6_Confidence_0.429_Length_2710, vo_c2_Locus_5247_Transcript_6/7_Confidence_0.600_Length_1453, vo_c2_Locus_80_Transcript_10/10_Confidence_0.207_Length_2759, vo_c3_Locus_3000_Transcript_6/15_Confidence_0.556_Length_1355, vo_n1_Locus_1856_Transcript_4/7_Confidence_0.462_Length_1396, vo_c2_Locus_5247_Transcript_5/7_Confidence_0.300_Length_1303, vo_c2_Locus_5247_Transcript_4/7_Confidence_0.400_Length_1501, vo_c1_Locus_2715_Transcript_6/14_Confidence_0.429_Length_1383, vo_c3_Locus_3737_Transcript_1/1_Confidence_0.500_Length_2762, vo_c2_Locus_5247_Transcript_7/7_Confidence_0.100_Length_1511, tri_c_comp13375_c0_seq4, vo_c1_Locus_1353_Transcript_2/5_Confidence_0.600_Length_1352, vo_c3_Locus_3000_Transcript_7/15_Confidence_0.259_Length_1522, vo_c2_Locus_6282_Transcript_1/2_Confidence_0.857_Length_2758, vo_n2_Locus_2860_Transcript_4/6_Confidence_0.583_Length_4084, tri_c_comp13375_c0_seq3, vo_n1_Locus_2992_Transcript_6/14_Confidence_0.476_Length_1522, vo_c3_Locus_13948_Transcript_1/1_Confidence_0.000_Length_1677, vo_c2_Locus_21951_Transcript_1/2_Confidence_0.667_Length_522, vo_c3_Locus_8549_Transcript_1/1_Confidence_0.000_Length_686, tri_n_comp6678_c0_seq2, vo_n1_Locus_29096_Transcript_1/1_Confidence_0.000_Length_4601, vo_n1_Locus_26419_Transcript_1/1_Confidence_0.000_Length_1111, vo_n1_Locus_24077_Transcript_1/2_Confidence_0.333_Length_525, vo_c2_Locus_3665_Transcript_1/2_Confidence_1.000_Length_637, tri_c_comp46174_c0_seq1, tri_n_comp45393_c0_seq1, tri_n_comp46803_c0_seq1,</p> |
|-----------------------|----------|----|-----------------------------------------------------------------------------------------------------------------------------------------------------------------------------------------------------------------------------------------------------------------------------------------------------------------------------------------------------------------------------------------------------------------------------------------------------------------------------------------------------------------------------------------------------------------------------------------------------------------------------------------------------------------------------------------|-------------------------------------------------------------------------|------------------------------------------------------------------------------------------------------------------------------------------------------------------------------------------------------------------------------------------------------------------------------------------------------------------------------------------------------------------------------------------------------------------------------------------------------------------------------------------------------------------------------------------------------------------------------------------------------------------------------------------------------------------------------------------------------------------------------------------------------------------------------------------------------------------------------------------------------------------------------------------------------------------------------------------------------------------------------------------------------------------------------------------------------------------------------------------------------------------------------------------------------------------------------------------------------------------------------------------------------------------------------------------------------------------------------------------------------------------------------------------------------------------------------------------------------------------------------------------------------------------------------------------------------------------------------------------------------------------------------------------------------------------------------------------------------------------------------------------------------------------------------------------------------------------------------------------------------------------------------------------------------------------------------------------------------------------------------------------------------------------------------------------------------------------------------------------------------------------------------------------------------------------------------------------------------------------------------------------------------------------------------------------------------------------------------------------------------------------------------------------------------------------------------------------------------------------------------------------------------------------------------------------------------------------------------------------------------------------------------------------------------------------------------------------------------------------------------------------------------------------------------------------------------------------------------------------------------------------------------------------------------------------------------------------------------------------------------------------------------------------------------------------------------------------------------------------------------------------------------------------------------------------------------------------------------------------------------------------------------------------------------------------------------------------------------------------------------------------------------------------------------------------------------------------------------------------------------------------------------------------------------------------------------------------------------------------------------------------------------------------------------------------------------------------------------------------------------------------------------------------------------------------------------------------------------------------------------------------------------------------------------------------------------------------------------------------------------------------------------------------------------------------------------------------------------------------------------------------------------------------------------------------------------------------------------------------------------------------------------------------------------------------------------------------------------------------------------------------------------------------------------------------------------------------------------------------------------------------------------------------------------------------------------------------------------------------------------------------------------------------------------------------------------------------------------------------------------------------------------------------------------------------------------------------------------------------------------------------------------------------------------------------------------------------------------------------------------------------------------------------------------------------------------------------------------------------------------------------------------------------------------------------------------------------------------------------------------------------------------------------------------------------------------------------------------------------------------------------------------------------------------------------------------------------------------------------------------------------------------------------------------------------------------------------------------------------------------------------------------------------------------------------------------------------------------------------------------------------------------------------------------------------------------------------------------------------------------------------------------------------------------------------------------------------------------------------------------------------------------------------------------------------------------------------------------------------------------------------------------------------------------------------------------------------------------------------------------------------------------------------------------------------------------------------------------------------------------------------------------------------------------------------------------------------------------------------------------------------------------------------------------------------------------------------------------------------------------------------------------------------------------------------------------------------------------------------------------------------------------------------------------------------------------------------------------------------------------------------------------------------------------------------------|



|  |  |  |  |                                                                                                                                                                                                                                                                                                                                                                                                                                                                                                                                                                                                                                                                                                                                                                                                                                                                                                                                                                                                                                                                                                                                                                                                                                                                                                                                                                                                                                                                                                                                                                                                                                                                                                                                                                                                                                                                                                                                                                                                                                                                                                                                                                                                                                                                                                                                                                                                                                                                                                                                                                                                                                                                                                                                                                                                                                                                                                                                                                                                                                                                                                                                                                                                                                                                                                                                                                                                                                                                                                                                                                                                                                                                                                                                                                                                                                                                                                                                                                                                                                                                                                                                                                                                                                                                                                                      |
|--|--|--|--|----------------------------------------------------------------------------------------------------------------------------------------------------------------------------------------------------------------------------------------------------------------------------------------------------------------------------------------------------------------------------------------------------------------------------------------------------------------------------------------------------------------------------------------------------------------------------------------------------------------------------------------------------------------------------------------------------------------------------------------------------------------------------------------------------------------------------------------------------------------------------------------------------------------------------------------------------------------------------------------------------------------------------------------------------------------------------------------------------------------------------------------------------------------------------------------------------------------------------------------------------------------------------------------------------------------------------------------------------------------------------------------------------------------------------------------------------------------------------------------------------------------------------------------------------------------------------------------------------------------------------------------------------------------------------------------------------------------------------------------------------------------------------------------------------------------------------------------------------------------------------------------------------------------------------------------------------------------------------------------------------------------------------------------------------------------------------------------------------------------------------------------------------------------------------------------------------------------------------------------------------------------------------------------------------------------------------------------------------------------------------------------------------------------------------------------------------------------------------------------------------------------------------------------------------------------------------------------------------------------------------------------------------------------------------------------------------------------------------------------------------------------------------------------------------------------------------------------------------------------------------------------------------------------------------------------------------------------------------------------------------------------------------------------------------------------------------------------------------------------------------------------------------------------------------------------------------------------------------------------------------------------------------------------------------------------------------------------------------------------------------------------------------------------------------------------------------------------------------------------------------------------------------------------------------------------------------------------------------------------------------------------------------------------------------------------------------------------------------------------------------------------------------------------------------------------------------------------------------------------------------------------------------------------------------------------------------------------------------------------------------------------------------------------------------------------------------------------------------------------------------------------------------------------------------------------------------------------------------------------------------------------------------------------------------------------------|
|  |  |  |  | <p>vo_n2_Locus_1565_Transcript_2/3_Confidence_0.400_Length_2971, vo_c1_Locus_2941_Transcript_1/5_Confidence_0.625_Length_2451, vo_c2_Locus_3489_Transcript_4/4_Confidence_0.286_Length_6498, vo_n2_Locus_12191_Transcript_8/8_Confidence_0.077_Length_5136, vo_c3_Locus_29721_Transcript_4/9_Confidence_0.357_Length_544, tri_n_comp54991_c0_seq1, vo_n2_Locus_212_Transcript_1/2_Confidence_0.667_Length_4253, tri_n_comp45898_c0_seq1, vo_c2_Locus_25849_Transcript_3/3_Confidence_0.000_Length_380, vo_n1_Locus_24077_Transcript_2/2_Confidence_0.000_Length_636, vo_c3_Locus_19591_Transcript_3/4_Confidence_0.429_Length_1562, vo_n2_Locus_14100_Transcript_2/6_Confidence_0.429_Length_978, tri_n_comp34592_c0_seq1, vo_n2_Locus_18092_Transcript_1/2_Confidence_1.000_Length_590, vo_c2_Locus_5970_Transcript_2/3_Confidence_0.400_Length_1948, vo_c1_Locus_12052_Transcript_1/1_Confidence_0.000_Length_2738, vo_c2_Locus_23845_Transcript_1/1_Confidence_0.500_Length_1993, vo_c3_Locus_11479_Transcript_1/2_Confidence_1.000_Length_1915, vo_c2_Locus_10542_Transcript_7/18_Confidence_0.290_Length_2762, vo_n1_Locus_9968_Transcript_1/1_Confidence_0.000_Length_2754, vo_c3_Locus_882_Transcript_5/5_Confidence_0.125_Length_2804, tri_c_comp17035_c0_seq1, tri_n_comp28983_c0_seq1, vo_n2_Locus_1838_Transcript_6/10_Confidence_0.524_Length_5262, tri_c_comp17035_c0_seq4, vo_c1_Locus_4956_Transcript_1/7_Confidence_0.600_Length_2026, vo_c2_Locus_21629_Transcript_1/2_Confidence_0.600_Length_5843, vo_c2_Locus_1147_Transcript_1/2_Confidence_0.750_Length_1828, vo_c3_Locus_4611_Transcript_2/3_Confidence_0.333_Length_1813, vo_c2_Locus_15210_Transcript_1/1_Confidence_0.000_Length_935, vo_n2_Locus_1536_Transcript_2/3_Confidence_0.400_Length_9999, vo_n2_Locus_1838_Transcript_3/10_Confidence_0.190_Length_2641, vo_n2_Locus_19943_Transcript_1/1_Confidence_0.333_Length_5399, vo_n2_Locus_6649_Transcript_25/30_Confidence_0.093_Length_2933, vo_c2_Locus_5289_Transcript_1/4_Confidence_0.556_Length_1812, vo_c2_Locus_10542_Transcript_1/18_Confidence_0.290_Length_2706, vo_c3_Locus_4899_Transcript_2/2_Confidence_0.000_Length_2213, vo_c2_Locus_29692_Transcript_1/1_Confidence_0.000_Length_3737, tri_c_comp9488_c0_seq2, vo_n1_Locus_2112_Transcript_1/3_Confidence_0.600_Length_3970, vo_n2_Locus_17002_Transcript_2/3_Confidence_0.333_Length_3454, vo_c2_Locus_35701_Transcript_2/2_Confidence_0.000_Length_939, vo_c2_Locus_27257_Transcript_1/2_Confidence_0.333_Length_3415, vo_n1_Locus_9358_Transcript_1/2_Confidence_0.333_Length_2793, vo_c1_Locus_6671_Transcript_2/2_Confidence_0.000_Length_1815, tri_n_comp28286_c0_seq1, vo_n1_Locus_5513_Transcript_4/4_Confidence_0.286_Length_1053, vo_c1_Locus_13409_Transcript_2/6_Confidence_0.286_Length_871, vo_c3_Locus_2169_Transcript_1/3_Confidence_0.167_Length_848, vo_n2_Locus_739_Transcript_8/8_Confidence_0.167_Length_1338, vo_c1_Locus_12423_Transcript_2/2_Confidence_0.333_Length_980, vo_n2_Locus_26604_Transcript_1/2_Confidence_0.750_Length_1361, vo_c2_Locus_4541_Transcript_2/6_Confidence_0.571_Length_909, vo_n2_Locus_26604_Transcript_2/2_Confidence_0.000_Length_1685, vo_n1_Locus_27053_Transcript_1/1_Confidence_0.333_Length_1866, vo_n2_Locus_1685_Transcript_1/2_Confidence_0.667_Length_854, vo_n2_Locus_2594_Transcript_4/9_Confidence_0.538_Length_5946, vo_c1_Locus_13409_Transcript_2/6_Confidence_0.286_Length_871, vo_c3_Locus_2169_Transcript_1/3_Confidence_0.167_Length_848, vo_n2_Locus_739_Transcript_8/8_Confidence_0.167_Length_1338, vo_c2_Locus_289_Transcript_2/6_Confidence_0.667_Length_4931, vo_c1_Locus_12423_Transcript_2/2_Confidence_0.333_Length_980, vo_n2_Locus_5279_Transcript_1/1_Confidence_0.333_Length_2493, vo_n3_Locus_24634_Transcript_1/1_Confidence_0.000_Length_445, vo_c2_Locus_289_Transcript_5/6_Confidence_0.667_Length_4996, vo_n1_Locus_5513_Transcript_4/4_Confidence_0.286_Length_1053, tri_c_comp24673_c0_seq1, vo_c3_Locus_167_Transcript_14/17_Confidence_0.041_Length_5034, vo_n2_Locus_26604_Transcript_1/2_Confidence_0.750_Length_1361, vo_n2_Locus_2594_Transcript_6/9_Confidence_0.538_Length_6223, vo_c2_Locus_4541_Transcript_2/6_Confidence_0.571_Length_909, vo_n2_Locus_26604_Transcript_2/2_Confidence_0.000_Length_1685</p> |
|--|--|--|--|----------------------------------------------------------------------------------------------------------------------------------------------------------------------------------------------------------------------------------------------------------------------------------------------------------------------------------------------------------------------------------------------------------------------------------------------------------------------------------------------------------------------------------------------------------------------------------------------------------------------------------------------------------------------------------------------------------------------------------------------------------------------------------------------------------------------------------------------------------------------------------------------------------------------------------------------------------------------------------------------------------------------------------------------------------------------------------------------------------------------------------------------------------------------------------------------------------------------------------------------------------------------------------------------------------------------------------------------------------------------------------------------------------------------------------------------------------------------------------------------------------------------------------------------------------------------------------------------------------------------------------------------------------------------------------------------------------------------------------------------------------------------------------------------------------------------------------------------------------------------------------------------------------------------------------------------------------------------------------------------------------------------------------------------------------------------------------------------------------------------------------------------------------------------------------------------------------------------------------------------------------------------------------------------------------------------------------------------------------------------------------------------------------------------------------------------------------------------------------------------------------------------------------------------------------------------------------------------------------------------------------------------------------------------------------------------------------------------------------------------------------------------------------------------------------------------------------------------------------------------------------------------------------------------------------------------------------------------------------------------------------------------------------------------------------------------------------------------------------------------------------------------------------------------------------------------------------------------------------------------------------------------------------------------------------------------------------------------------------------------------------------------------------------------------------------------------------------------------------------------------------------------------------------------------------------------------------------------------------------------------------------------------------------------------------------------------------------------------------------------------------------------------------------------------------------------------------------------------------------------------------------------------------------------------------------------------------------------------------------------------------------------------------------------------------------------------------------------------------------------------------------------------------------------------------------------------------------------------------------------------------------------------------------------------------------------|

|                     |          |    |                                                                                                                                                                                                                                                                                                                                                                                                                                                                                                                                                                                                                                                                                                 |                                                                     |                                                                                                                                                                                                                                                                                                                                                                                                                                                                                                                                                                                                                                                                                                                                                                                                                                                                                                                                                                                                                                                                                                                                                                                                                                                                                                                                                                                                                                                                                                                                                                                                                                                                                                                                                                                                                                                                                                                                                                                                                                                                                                                                                                                                                                                                                                                                                                                                                                                                                                                                                                                                                                                                                                                                                                                                                                                                                                                                                                                                                                                                                                                                                                                                                                                                                                                                                                                                                                                                                                                                                                                                                                                                                                                                                                                                                                                                                                                                                                                                                                                                                                                                                                                                                                                                                                                                                                                                                                                                                                                                                                                                                                                                                                                                                                                                                                                                                                                                                                                                                                                                                                                                                                                                                                                                                                                                                                                                                                                                                                                                                                                                                                                                                                                                                                                                                                                                                                                                                                                                                                                                                                                                                                                                                                                                                                                                                                                                                                                                                                                                                                                                                                                                                                                                                                                                                                                                                                                                                                                                                                                     |
|---------------------|----------|----|-------------------------------------------------------------------------------------------------------------------------------------------------------------------------------------------------------------------------------------------------------------------------------------------------------------------------------------------------------------------------------------------------------------------------------------------------------------------------------------------------------------------------------------------------------------------------------------------------------------------------------------------------------------------------------------------------|---------------------------------------------------------------------|-----------------------------------------------------------------------------------------------------------------------------------------------------------------------------------------------------------------------------------------------------------------------------------------------------------------------------------------------------------------------------------------------------------------------------------------------------------------------------------------------------------------------------------------------------------------------------------------------------------------------------------------------------------------------------------------------------------------------------------------------------------------------------------------------------------------------------------------------------------------------------------------------------------------------------------------------------------------------------------------------------------------------------------------------------------------------------------------------------------------------------------------------------------------------------------------------------------------------------------------------------------------------------------------------------------------------------------------------------------------------------------------------------------------------------------------------------------------------------------------------------------------------------------------------------------------------------------------------------------------------------------------------------------------------------------------------------------------------------------------------------------------------------------------------------------------------------------------------------------------------------------------------------------------------------------------------------------------------------------------------------------------------------------------------------------------------------------------------------------------------------------------------------------------------------------------------------------------------------------------------------------------------------------------------------------------------------------------------------------------------------------------------------------------------------------------------------------------------------------------------------------------------------------------------------------------------------------------------------------------------------------------------------------------------------------------------------------------------------------------------------------------------------------------------------------------------------------------------------------------------------------------------------------------------------------------------------------------------------------------------------------------------------------------------------------------------------------------------------------------------------------------------------------------------------------------------------------------------------------------------------------------------------------------------------------------------------------------------------------------------------------------------------------------------------------------------------------------------------------------------------------------------------------------------------------------------------------------------------------------------------------------------------------------------------------------------------------------------------------------------------------------------------------------------------------------------------------------------------------------------------------------------------------------------------------------------------------------------------------------------------------------------------------------------------------------------------------------------------------------------------------------------------------------------------------------------------------------------------------------------------------------------------------------------------------------------------------------------------------------------------------------------------------------------------------------------------------------------------------------------------------------------------------------------------------------------------------------------------------------------------------------------------------------------------------------------------------------------------------------------------------------------------------------------------------------------------------------------------------------------------------------------------------------------------------------------------------------------------------------------------------------------------------------------------------------------------------------------------------------------------------------------------------------------------------------------------------------------------------------------------------------------------------------------------------------------------------------------------------------------------------------------------------------------------------------------------------------------------------------------------------------------------------------------------------------------------------------------------------------------------------------------------------------------------------------------------------------------------------------------------------------------------------------------------------------------------------------------------------------------------------------------------------------------------------------------------------------------------------------------------------------------------------------------------------------------------------------------------------------------------------------------------------------------------------------------------------------------------------------------------------------------------------------------------------------------------------------------------------------------------------------------------------------------------------------------------------------------------------------------------------------------------------------------------------------------------------------------------------------------------------------------------------------------------------------------------------------------------------------------------------------------------------------------------------------------------------------------------------------------------------------------------------------------------------------------------------------------------------------------------------------------------------------------------|
| Pyruvate metabolism | map00620 | 21 | <p>ec:6.4.1.1 - carboxylase, ec:6.4.1.2 - carboxylase, ec:4.1.1.49 - carboxykinase (ATP), ec:4.1.1.32 - carboxykinase (GTP), ec:2.7.1.40 - kinase, ec:6.2.1.1 - ligase, ec:1.8.1.4 - dehydrogenase, ec:1.2.1.3 - dehydrogenase (NAD+), ec:2.3.1.9 - C-acetyltransferase, ec:4.4.1.5 - lyase, ec:1.1.5.4 - dehydrogenase (quinone), ec:2.3.3.13 - synthase, ec:4.2.1.2 - hydratase, ec:2.3.1.54 - C-acetyltransferase, ec:3.1.2.6 - hydrolase, ec:2.7.9.2 - water dikinase, ec:1.1.1.82 - dehydrogenase (NADP+), ec:1.1.1.37 - dehydrogenase, ec:1.1.1.39 - dehydrogenase (decarboxylating), ec:1.1.1.40 - dehydrogenase (oxaloacetate-decarboxylating) (NADP+), ec:1.1.1.28 - dehydrogenase</p> | 1, 16, 5, 5, 25, 1, 2, 5, 2, 2, 3, 1, 2, 9, 7, 15, 23, 24, 11, 7, 9 | <p>vo_n2_Locus_15097_Transcript_1/1_Confidence_0.000_Length_3935, vo_n3_Locus_484_Transcript_6/12_Confidence_0.250_Length_1533, vo_c3_Locus_17332_Transcript_1/1_Confidence_0.333_Length_6493, vo_n3_Locus_696_Transcript_20/35_Confidence_0.473_Length_5396, vo_c3_Locus_2164_Transcript_38/39_Confidence_0.292_Length_6879, tri_n_comp41552_c0_seq1, vo_c2_Locus_1509_Transcript_1/47_Confidence_0.149_Length_2731, vo_c2_Locus_2193_Transcript_1/3_Confidence_0.667_Length_1218, vo_c1_Locus_860_Transcript_10/29_Confidence_0.571_Length_6744, vo_c2_Locus_1509_Transcript_11/47_Confidence_0.164_Length_2686, vo_n2_Locus_1751_Transcript_51/59_Confidence_0.207_Length_3566, vo_n2_Locus_15097_Transcript_1/1_Confidence_0.000_Length_3935, vo_n3_Locus_484_Transcript_5/12_Confidence_0.250_Length_1451, vo_c1_Locus_860_Transcript_11/29_Confidence_0.571_Length_6741, tri_c_comp19913_c0_seq3, vo_n2_Locus_1751_Transcript_37/59_Confidence_0.195_Length_3437, vo_c2_Locus_1509_Transcript_6/47_Confidence_0.149_Length_2592, vo_c1_Locus_2295_Transcript_9/10_Confidence_0.238_Length_2213, vo_c2_Locus_2862_Transcript_9/10_Confidence_0.250_Length_2209, vo_c1_Locus_2295_Transcript_3/10_Confidence_0.524_Length_2330, vo_n2_Locus_1690_Transcript_8/11_Confidence_0.429_Length_2234, vo_n2_Locus_1690_Transcript_9/11_Confidence_0.429_Length_2277, vo_c1_Locus_2295_Transcript_9/10_Confidence_0.238_Length_2213, vo_c2_Locus_2862_Transcript_9/10_Confidence_0.250_Length_2209, vo_c1_Locus_2295_Transcript_3/10_Confidence_0.524_Length_2330, vo_n2_Locus_1690_Transcript_8/11_Confidence_0.429_Length_2234, vo_n2_Locus_1690_Transcript_9/11_Confidence_0.429_Length_2277, vo_n2_Locus_9037_Transcript_9/15_Confidence_0.486_Length_4553, vo_c2_Locus_684_Transcript_7/16_Confidence_0.194_Length_2803, vo_n3_Locus_2293_Transcript_1/2_Confidence_0.750_Length_1794, vo_n3_Locus_1756_Transcript_10/15_Confidence_0.393_Length_2226, vo_c3_Locus_725_Transcript_6/15_Confidence_0.548_Length_5086, vo_n3_Locus_1756_Transcript_7/15_Confidence_0.250_Length_2226, vo_n2_Locus_16147_Transcript_1/1_Confidence_0.000_Length_1452, vo_n2_Locus_9037_Transcript_2/15_Confidence_0.257_Length_3951, vo_n2_Locus_9037_Transcript_13/15_Confidence_0.143_Length_1729, vo_n2_Locus_9037_Transcript_5/15_Confidence_0.286_Length_2279, vo_n2_Locus_9037_Transcript_6/15_Confidence_0.229_Length_2279, tri_c_comp19644_c0_seq1, vo_n2_Locus_171_Transcript_17/42_Confidence_0.229_Length_1803, tri_c_comp19644_c0_seq4, vo_c3_Locus_12256_Transcript_3/3_Confidence_0.000_Length_508, vo_c3_Locus_725_Transcript_12/15_Confidence_0.290_Length_3194, vo_c1_Locus_6543_Transcript_5/23_Confidence_0.220_Length_2294, vo_n2_Locus_9037_Transcript_12/15_Confidence_0.257_Length_2318, vo_c3_Locus_725_Transcript_13/15_Confidence_0.452_Length_4249, tri_n_comp19211_c0_seq1, vo_c3_Locus_883_Transcript_1/2_Confidence_1.000_Length_1783, vo_n2_Locus_9037_Transcript_1/15_Confidence_0.143_Length_1677, vo_c3_Locus_307_Transcript_2/21_Confidence_0.576_Length_1809, vo_n1_Locus_41_Transcript_20/90_Confidence_0.068_Length_2175, vo_c2_Locus_1667_Transcript_21/21_Confidence_0.195_Length_1788, vo_n3_Locus_9269_Transcript_1/1_Confidence_0.000_Length_2238, vo_n3_Locus_6810_Transcript_2/3_Confidence_0.913_Length_1699, vo_n1_Locus_6460_Transcript_1/1_Confidence_0.000_Length_1912, tri_c_comp55340_c0_seq1, vo_n1_Locus_19864_Transcript_2/2_Confidence_0.000_Length_2707, vo_c3_Locus_21741_Transcript_5/9_Confidence_0.583_Length_1757, vo_n3_Locus_25600_Transcript_5/6_Confidence_0.375_Length_1777, tri_n_comp58061_c0_seq1, vo_c1_Locus_2657_Transcript_1/1_Confidence_0.000_Length_1513, vo_n2_Locus_23058_Transcript_1/1_Confidence_0.000_Length_1342, vo_c1_Locus_17818_Transcript_2/2_Confidence_0.000_Length_800, vo_n2_Locus_4321_Transcript_1/2_Confidence_0.750_Length_948, vo_n1_Locus_833_Transcript_2/6_Confidence_0.333_Length_2200, vo_n2_Locus_3042_Transcript_2/3_Confidence_0.750_Length_2030, vo_c1_Locus_6244_Transcript_1/2_Confidence_0.750_Length_1731, vo_n1_Locus_2267_Transcript_1/1_Confidence_0.000_Length_2010, tri_n_comp8247_c0_seq2, vo_c3_Locus_1133_Transcript_4/9_Confidence_0.455_Length_1666, vo_c3_Locus_1564_Transcript_1/27_Confidence_0.474_Length_3491, vo_n2_Locus_4549_Transcript_18/24_Confidence_0.395_Length_3486, vo_c1_Locus_1748_Transcript_10/39_Confidence_0.197_Length_3498, vo_c1_Locus_1748_Transcript_19/39_Confidence_0.211_Length_3788, vo_c1_Locus_1748_Transcript_30/39_Confidence_0.282_Length_4645, vo_n2_Locus_4549_Transcript_11/24_Confidence_0.474_Length_3796, vo_n1_Locus_103_Transcript_17/28_Confidence_0.483_Length_3469, vo_n3_Locus_2375_Transcript_13/19_Confidence_0.467_Length_3465, vo_c3_Locus_1564_Transcript_22/27_Confidence_0.526_Length_3527, vo_c1_Locus_31307_Transcript_5/10_Confidence_0.467_Length_800, vo_n1_Locus_29308_Transcript_2/2_Confidence_0.000_Length_535, vo_n2_Locus_8305_Transcript_5/8_Confidence_0.143_Length_2284, vo_c1_Locus_31307_Transcript_7/10_Confidence_0.467_Length_896, vo_c3_Locus_32598_Transcript_4/10_Confidence_0.385_Length_1319, vo_c2_Locus_15787_Transcript_2/5_Confidence_0.400_Length_917, vo_c2_Locus_15787_Transcript_4/5_Confidence_0.300_Length_1396, vo_c1_Locus_1662_Transcript_19/44_Confidence_0.278_Length_3148, vo_n2_Locus_1146_Transcript_9/32_Confidence_0.492_Length_2897, vo_n3_Locus_3213_Transcript_1/29_Confidence_0.022_Length_515, vo_n1_Locus_1032_Transcript_1/39_Confidence_0.018_Length_458, tri_n_comp20108_c0_seq2, vo_c1_Locus_1662_Transcript_28/44_Confidence_0.200_Length_3087, vo_c2_Locus_49_Transcript_21/157_Confidence_0.007_Length_465, vo_c2_Locus_49_Transcript_31/157_Confidence_0.027_Length_1554, vo_c2_Locus_49_Transcript_20/157_Confidence_0.037_Length_3535, vo_c1_Locus_1662_Transcript_6/44_Confidence_0.211_Length_3160, vo_c2_Locus_49_Transcript_28/157_Confidence_0.071_Length_2983, vo_n1_Locus_1032_Transcript_5/39_Confidence_0.404_Length_3016, vo_n1_Locus_1032_Transcript_38/39_Confidence_0.228_Length_2924, vo_n1_Locus_1032_Transcript_8/39_Confidence_0.386_Length_2954, vo_c3_Locus_1031_Transcript_12/33_Confidence_0.385_Length_3145, vo_c3_Locus_1723_Transcript_29/37_Confidence_0.411_Length_1695, vo_n2_Locus_330_Transcript_25/38_Confidence_0.361_Length_1516, vo_c3_Locus_1723_Transcript_35/37_Confidence_0.464_Length_1702, vo_c1_Locus_7371_Transcript_4/4_Confidence_0.600_Length_1352, vo_c3_Locus_1723_Transcript_37/37_Confidence_0.214_Length_1530, vo_n1_Locus_769_Transcript_28/41_Confidence_0.400_Length_1609, vo_n1_Locus_769_Transcript_9/41_Confidence_0.460_Length_1494, vo_c3_Locus_2965_Transcript_2/2_Confidence_0.250_Length_1327, vo_n2_Locus_330_Transcript_5/38_Confidence_0.328_Length_11715, vo_n1_Locus_9772_Transcript_1/2_Confidence_0.333_Length_1224, vo_c1_Locus_3603_Transcript_44/48_Confidence_0.492_Length_1696, vo_c2_Locus_4242_Transcript_2/3_Confidence_0.400_Length_1168,</p> |
|---------------------|----------|----|-------------------------------------------------------------------------------------------------------------------------------------------------------------------------------------------------------------------------------------------------------------------------------------------------------------------------------------------------------------------------------------------------------------------------------------------------------------------------------------------------------------------------------------------------------------------------------------------------------------------------------------------------------------------------------------------------|---------------------------------------------------------------------|-----------------------------------------------------------------------------------------------------------------------------------------------------------------------------------------------------------------------------------------------------------------------------------------------------------------------------------------------------------------------------------------------------------------------------------------------------------------------------------------------------------------------------------------------------------------------------------------------------------------------------------------------------------------------------------------------------------------------------------------------------------------------------------------------------------------------------------------------------------------------------------------------------------------------------------------------------------------------------------------------------------------------------------------------------------------------------------------------------------------------------------------------------------------------------------------------------------------------------------------------------------------------------------------------------------------------------------------------------------------------------------------------------------------------------------------------------------------------------------------------------------------------------------------------------------------------------------------------------------------------------------------------------------------------------------------------------------------------------------------------------------------------------------------------------------------------------------------------------------------------------------------------------------------------------------------------------------------------------------------------------------------------------------------------------------------------------------------------------------------------------------------------------------------------------------------------------------------------------------------------------------------------------------------------------------------------------------------------------------------------------------------------------------------------------------------------------------------------------------------------------------------------------------------------------------------------------------------------------------------------------------------------------------------------------------------------------------------------------------------------------------------------------------------------------------------------------------------------------------------------------------------------------------------------------------------------------------------------------------------------------------------------------------------------------------------------------------------------------------------------------------------------------------------------------------------------------------------------------------------------------------------------------------------------------------------------------------------------------------------------------------------------------------------------------------------------------------------------------------------------------------------------------------------------------------------------------------------------------------------------------------------------------------------------------------------------------------------------------------------------------------------------------------------------------------------------------------------------------------------------------------------------------------------------------------------------------------------------------------------------------------------------------------------------------------------------------------------------------------------------------------------------------------------------------------------------------------------------------------------------------------------------------------------------------------------------------------------------------------------------------------------------------------------------------------------------------------------------------------------------------------------------------------------------------------------------------------------------------------------------------------------------------------------------------------------------------------------------------------------------------------------------------------------------------------------------------------------------------------------------------------------------------------------------------------------------------------------------------------------------------------------------------------------------------------------------------------------------------------------------------------------------------------------------------------------------------------------------------------------------------------------------------------------------------------------------------------------------------------------------------------------------------------------------------------------------------------------------------------------------------------------------------------------------------------------------------------------------------------------------------------------------------------------------------------------------------------------------------------------------------------------------------------------------------------------------------------------------------------------------------------------------------------------------------------------------------------------------------------------------------------------------------------------------------------------------------------------------------------------------------------------------------------------------------------------------------------------------------------------------------------------------------------------------------------------------------------------------------------------------------------------------------------------------------------------------------------------------------------------------------------------------------------------------------------------------------------------------------------------------------------------------------------------------------------------------------------------------------------------------------------------------------------------------------------------------------------------------------------------------------------------------------------------------------------------------------------------------------------------------------------------------------------------------------|

|  |  |  |  |                                                                                                                                                                                                                                                                                                                                                                                                                                                                                                                                                                                                                                                                                                                                                                                                                                                                                                                                                                                                                                                                                                                                                                                                                                                                                                                                                                                                                                                                                                                                                                                                                                                                                                                                                                                                                                                                                                                                                                                                                                                                                                                                                                                                                                                                                                                                                                                                                                                                                                                                                                                                                                                                                                                                                                                                                                                                                                                                                                                                                                                                                                                                                                                                                                                                                                                                                                                                                                                                                                                                                                                                                                                                                                                                                                                                                                           |
|--|--|--|--|-------------------------------------------------------------------------------------------------------------------------------------------------------------------------------------------------------------------------------------------------------------------------------------------------------------------------------------------------------------------------------------------------------------------------------------------------------------------------------------------------------------------------------------------------------------------------------------------------------------------------------------------------------------------------------------------------------------------------------------------------------------------------------------------------------------------------------------------------------------------------------------------------------------------------------------------------------------------------------------------------------------------------------------------------------------------------------------------------------------------------------------------------------------------------------------------------------------------------------------------------------------------------------------------------------------------------------------------------------------------------------------------------------------------------------------------------------------------------------------------------------------------------------------------------------------------------------------------------------------------------------------------------------------------------------------------------------------------------------------------------------------------------------------------------------------------------------------------------------------------------------------------------------------------------------------------------------------------------------------------------------------------------------------------------------------------------------------------------------------------------------------------------------------------------------------------------------------------------------------------------------------------------------------------------------------------------------------------------------------------------------------------------------------------------------------------------------------------------------------------------------------------------------------------------------------------------------------------------------------------------------------------------------------------------------------------------------------------------------------------------------------------------------------------------------------------------------------------------------------------------------------------------------------------------------------------------------------------------------------------------------------------------------------------------------------------------------------------------------------------------------------------------------------------------------------------------------------------------------------------------------------------------------------------------------------------------------------------------------------------------------------------------------------------------------------------------------------------------------------------------------------------------------------------------------------------------------------------------------------------------------------------------------------------------------------------------------------------------------------------------------------------------------------------------------------------------------------------|
|  |  |  |  | <p>vo_n1_Locus_6649_Transcript_2/3_Confidence_0.500_Length_2124, vo_c1_Locus_7371_Transcript_1/4_Confidence_0.500_Length_1352, vo_n3_Locus_2381_Transcript_2/3_Confidence_0.500_Length_1330, vo_c3_Locus_1723_Transcript_16/37_Confidence_0.286_Length_1491, vo_n1_Locus_769_Transcript_36/41_Confidence_0.420_Length_1536, vo_n1_Locus_769_Transcript_40/41_Confidence_0.320_Length_1479, vo_n1_Locus_6649_Transcript_1/3_Confidence_0.750_Length_1883, vo_c1_Locus_3603_Transcript_26/48_Confidence_0.400_Length_1432, vo_n1_Locus_5348_Transcript_2/2_Confidence_0.200_Length_1608, vo_n3_Locus_3383_Transcript_35/37_Confidence_0.389_Length_1512, tri_c_comp20802_c0_seq1, vo_c3_Locus_1723_Transcript_29/37_Confidence_0.411_Length_1695, vo_n2_Locus_330_Transcript_25/38_Confidence_0.361_Length_1516, vo_c3_Locus_1723_Transcript_35/37_Confidence_0.464_Length_1702, vo_c1_Locus_15206_Transcript_3/3_Confidence_0.000_Length_1312, vo_c1_Locus_7371_Transcript_4/4_Confidence_0.600_Length_1352, vo_c3_Locus_1723_Transcript_37/37_Confidence_0.214_Length_1530, vo_n1_Locus_769_Transcript_28/41_Confidence_0.400_Length_1609, vo_n1_Locus_769_Transcript_9/41_Confidence_0.460_Length_1494, vo_c3_Locus_2965_Transcript_2/2_Confidence_0.250_Length_1327, vo_n2_Locus_330_Transcript_5/38_Confidence_0.328_Length_11715, vo_n1_Locus_9772_Transcript_1/2_Confidence_0.333_Length_1224, vo_c1_Locus_3603_Transcript_44/48_Confidence_0.492_Length_1696, vo_c2_Locus_4242_Transcript_2/3_Confidence_0.400_Length_1168, vo_n1_Locus_6649_Transcript_2/3_Confidence_0.500_Length_2124, vo_c1_Locus_7371_Transcript_1/4_Confidence_0.500_Length_1352, vo_n3_Locus_2381_Transcript_2/3_Confidence_0.500_Length_1330, vo_c3_Locus_1723_Transcript_16/37_Confidence_0.286_Length_1491, vo_n1_Locus_769_Transcript_36/41_Confidence_0.420_Length_1536, vo_n1_Locus_769_Transcript_40/41_Confidence_0.320_Length_1479, vo_n1_Locus_6649_Transcript_1/3_Confidence_0.750_Length_1883, vo_c1_Locus_3603_Transcript_26/48_Confidence_0.400_Length_1432, vo_n1_Locus_5348_Transcript_2/2_Confidence_0.200_Length_1608, vo_n3_Locus_3383_Transcript_35/37_Confidence_0.389_Length_1512, tri_c_comp20802_c0_seq1, vo_c1_Locus_8302_Transcript_51/55_Confidence_0.100_Length_500, vo_n2_Locus_2969_Transcript_26/36_Confidence_0.373_Length_1726, vo_n3_Locus_8916_Transcript_29/29_Confidence_0.191_Length_2143, vo_c1_Locus_8302_Transcript_52/55_Confidence_0.100_Length_554, vo_c1_Locus_8302_Transcript_26/55_Confidence_0.129_Length_1144, vo_n3_Locus_8916_Transcript_11/29_Confidence_0.277_Length_861, vo_n2_Locus_2969_Transcript_30/36_Confidence_0.441_Length_2103, vo_c1_Locus_8302_Transcript_55/55_Confidence_0.043_Length_1090, vo_c3_Locus_20712_Transcript_20/28_Confidence_0.550_Length_2132, tri_c_comp20385_c0_seq1, vo_c1_Locus_8302_Transcript_54/55_Confidence_0.114_Length_1036, vo_n3_Locus_8916_Transcript_29/29_Confidence_0.191_Length_2143, vo_c1_Locus_8302_Transcript_26/55_Confidence_0.129_Length_1144, vo_n3_Locus_8916_Transcript_11/29_Confidence_0.277_Length_861, vo_n2_Locus_2969_Transcript_30/36_Confidence_0.441_Length_2103, vo_c3_Locus_20712_Transcript_20/28_Confidence_0.550_Length_2132, tri_c_comp20385_c0_seq1, tri_c_comp20385_c0_seq4, vo_n3_Locus_19185_Transcript_2/2_Confidence_0.000_Length_1260, vo_c2_Locus_2981_Transcript_2/13_Confidence_0.389_Length_2102, vo_c3_Locus_11593_Transcript_2/4_Confidence_0.286_Length_1967, tri_c_comp25619_c0_seq1, vo_c3_Locus_3313_Transcript_3/12_Confidence_0.182_Length_3522, vo_n2_Locus_8997_Transcript_3/3_Confidence_0.167_Length_2401, vo_n2_Locus_9550_Transcript_1/2_Confidence_0.333_Length_1798, vo_c2_Locus_6699_Transcript_1/2_Confidence_0.667_Length_1590, vo_n2_Locus_20141_Transcript_2/18_Confidence_0.143_Length_2044</p> |
|--|--|--|--|-------------------------------------------------------------------------------------------------------------------------------------------------------------------------------------------------------------------------------------------------------------------------------------------------------------------------------------------------------------------------------------------------------------------------------------------------------------------------------------------------------------------------------------------------------------------------------------------------------------------------------------------------------------------------------------------------------------------------------------------------------------------------------------------------------------------------------------------------------------------------------------------------------------------------------------------------------------------------------------------------------------------------------------------------------------------------------------------------------------------------------------------------------------------------------------------------------------------------------------------------------------------------------------------------------------------------------------------------------------------------------------------------------------------------------------------------------------------------------------------------------------------------------------------------------------------------------------------------------------------------------------------------------------------------------------------------------------------------------------------------------------------------------------------------------------------------------------------------------------------------------------------------------------------------------------------------------------------------------------------------------------------------------------------------------------------------------------------------------------------------------------------------------------------------------------------------------------------------------------------------------------------------------------------------------------------------------------------------------------------------------------------------------------------------------------------------------------------------------------------------------------------------------------------------------------------------------------------------------------------------------------------------------------------------------------------------------------------------------------------------------------------------------------------------------------------------------------------------------------------------------------------------------------------------------------------------------------------------------------------------------------------------------------------------------------------------------------------------------------------------------------------------------------------------------------------------------------------------------------------------------------------------------------------------------------------------------------------------------------------------------------------------------------------------------------------------------------------------------------------------------------------------------------------------------------------------------------------------------------------------------------------------------------------------------------------------------------------------------------------------------------------------------------------------------------------------------------------|

|                              |          |    |                                                                                                                                                                                                                                                                                                                                                                                                                                                                                                                                                                                                                                                                                                                                                   |                                                                      |                                                                                                                                                                                                                                                                                                                                                                                                                                                                                                                                                                                                                                                                                                                                                                                                                                                                                                                                                                                                                                                                                                                                                                                                                                                                                                                                                                                                                                                                                                                                                                                                                                                                                                                                                                                                                                                                                                                                                                                                                                                                                                                                                                                                                                                                                                                                                                                                                                                                                                                                                                                                                                                                                                                                                                                                                                                                                                                                                                                                                                                                                                                                                                                                                                                                                                                                                                                                                                                                                                                                                                                                                                                                                                                                                                                                                                                                                                                                                                                                                                                                                                                                                                                                                                                                                                                                                                                                                                                                                                                                                                                                                                                                                                                                                                                                                                                                                                                                                                                                                                                                                                                                                                                                                                                                                                                                                                                                                                                                                                                                                                                                                                                                                                                                                                                                                                                                                                                                                                                                                                                                                                                                                                                                                                                                                                                                                                                                                                                                                                                                                                                                                                                                                                                                                                                                                                                                                                                                                                                                                                                                                         |
|------------------------------|----------|----|---------------------------------------------------------------------------------------------------------------------------------------------------------------------------------------------------------------------------------------------------------------------------------------------------------------------------------------------------------------------------------------------------------------------------------------------------------------------------------------------------------------------------------------------------------------------------------------------------------------------------------------------------------------------------------------------------------------------------------------------------|----------------------------------------------------------------------|-----------------------------------------------------------------------------------------------------------------------------------------------------------------------------------------------------------------------------------------------------------------------------------------------------------------------------------------------------------------------------------------------------------------------------------------------------------------------------------------------------------------------------------------------------------------------------------------------------------------------------------------------------------------------------------------------------------------------------------------------------------------------------------------------------------------------------------------------------------------------------------------------------------------------------------------------------------------------------------------------------------------------------------------------------------------------------------------------------------------------------------------------------------------------------------------------------------------------------------------------------------------------------------------------------------------------------------------------------------------------------------------------------------------------------------------------------------------------------------------------------------------------------------------------------------------------------------------------------------------------------------------------------------------------------------------------------------------------------------------------------------------------------------------------------------------------------------------------------------------------------------------------------------------------------------------------------------------------------------------------------------------------------------------------------------------------------------------------------------------------------------------------------------------------------------------------------------------------------------------------------------------------------------------------------------------------------------------------------------------------------------------------------------------------------------------------------------------------------------------------------------------------------------------------------------------------------------------------------------------------------------------------------------------------------------------------------------------------------------------------------------------------------------------------------------------------------------------------------------------------------------------------------------------------------------------------------------------------------------------------------------------------------------------------------------------------------------------------------------------------------------------------------------------------------------------------------------------------------------------------------------------------------------------------------------------------------------------------------------------------------------------------------------------------------------------------------------------------------------------------------------------------------------------------------------------------------------------------------------------------------------------------------------------------------------------------------------------------------------------------------------------------------------------------------------------------------------------------------------------------------------------------------------------------------------------------------------------------------------------------------------------------------------------------------------------------------------------------------------------------------------------------------------------------------------------------------------------------------------------------------------------------------------------------------------------------------------------------------------------------------------------------------------------------------------------------------------------------------------------------------------------------------------------------------------------------------------------------------------------------------------------------------------------------------------------------------------------------------------------------------------------------------------------------------------------------------------------------------------------------------------------------------------------------------------------------------------------------------------------------------------------------------------------------------------------------------------------------------------------------------------------------------------------------------------------------------------------------------------------------------------------------------------------------------------------------------------------------------------------------------------------------------------------------------------------------------------------------------------------------------------------------------------------------------------------------------------------------------------------------------------------------------------------------------------------------------------------------------------------------------------------------------------------------------------------------------------------------------------------------------------------------------------------------------------------------------------------------------------------------------------------------------------------------------------------------------------------------------------------------------------------------------------------------------------------------------------------------------------------------------------------------------------------------------------------------------------------------------------------------------------------------------------------------------------------------------------------------------------------------------------------------------------------------------------------------------------------------------------------------------------------------------------------------------------------------------------------------------------------------------------------------------------------------------------------------------------------------------------------------------------------------------------------------------------------------------------------------------------------------------------------------------------------------------------------------------------------|
| Glycolysis / Gluconeogenesis | map00010 | 21 | <p>ec:2.7.1.90 - 1-phosphotransferase, ec:4.1.1.49 - carboxykinase (ATP), ec:4.1.1.32 - carboxykinase (GTP), ec:2.7.2.3 - kinase, ec:2.7.1.40 - kinase, ec:1.2.1.59 - dehydrogenase (NAD(P)+) (phosphorylating), ec:2.7.1.11 - phosphohexokinase, ec:6.2.1.1 - ligase, ec:1.2.1.12 - dehydrogenase (phosphorylating), ec:1.8.1.4 - dehydrogenase, ec:5.3.1.1 - isomerase, ec:5.3.1.9 - isomerase, ec:1.1.1.2 - dehydrogenase (NADP+), ec:1.2.1.5 - dehydrogenase [NAD(P)+], ec:1.2.1.3 - dehydrogenase (NAD+), ec:1.2.1.9 - dehydrogenase (NADP+), ec:4.1.2.13 - aldolase, ec:2.7.1.2 - glucokinase (phosphorylating), ec:3.1.3.11 - hexose diphosphatase, ec:4.2.1.11 - hydratase, ec:5.4.2.2 - (alpha-D-glucose-1,6-bisphosphate-dependent)</p> | 1, 5, 5, 41, 25, 16, 5, 1, 45, 2, 9, 2, 10, 2, 5, 9, 38, 2, 8, 23, 7 | <p>vo_c2_Locus_6348_Transcript_1/2_Confidence_1.000_Length_3755, vo_c1_Locus_2295_Transcript_9/10_Confidence_0.238_Length_2213, vo_c2_Locus_2862_Transcript_9/10_Confidence_0.250_Length_2209, vo_c1_Locus_2295_Transcript_3/10_Confidence_0.524_Length_2330, vo_n2_Locus_1690_Transcript_8/11_Confidence_0.429_Length_2234, vo_n2_Locus_1690_Transcript_9/11_Confidence_0.429_Length_2277, vo_c1_Locus_2295_Transcript_9/10_Confidence_0.238_Length_2213, vo_c2_Locus_2862_Transcript_9/10_Confidence_0.250_Length_2209, vo_c1_Locus_2295_Transcript_3/10_Confidence_0.524_Length_2330, vo_n2_Locus_1690_Transcript_8/11_Confidence_0.429_Length_2234, vo_n2_Locus_1690_Transcript_9/11_Confidence_0.429_Length_2277, vo_n3_Locus_2623_Transcript_14/17_Confidence_0.556_Length_1555, vo_n3_Locus_74_Transcript_17/25_Confidence_0.436_Length_1764, vo_c1_Locus_788_Transcript_17/34_Confidence_0.404_Length_1861, vo_c1_Locus_788_Transcript_30/34_Confidence_0.255_Length_1712, tri_c_comp19022_c0_seq2, vo_c3_Locus_239_Transcript_24/29_Confidence_0.409_Length_3108, vo_c2_Locus_298_Transcript_10/24_Confidence_0.500_Length_1796, tri_n_comp18813_c0_seq15, vo_n2_Locus_106_Transcript_17/30_Confidence_0.344_Length_2068, tri_n_comp18813_c0_seq11, vo_n1_Locus_2248_Transcript_15/40_Confidence_0.275_Length_1844, tri_n_comp18813_c0_seq10, tri_n_comp20156_c0_seq1, vo_c2_Locus_3634_Transcript_2/8_Confidence_0.467_Length_2376, vo_c1_Locus_788_Transcript_5/34_Confidence_0.340_Length_1423, vo_n2_Locus_2252_Transcript_14/26_Confidence_0.410_Length_2227, vo_c3_Locus_239_Transcript_16/29_Confidence_0.364_Length_1433, vo_c3_Locus_2347_Transcript_16/16_Confidence_0.270_Length_1737, vo_c2_Locus_298_Transcript_21/24_Confidence_0.368_Length_1678, vo_c3_Locus_3927_Transcript_2/9_Confidence_0.250_Length_2629, vo_c2_Locus_3634_Transcript_8/8_Confidence_0.133_Length_2428, vo_c2_Locus_2437_Transcript_14/25_Confidence_0.455_Length_1511, vo_c1_Locus_3033_Transcript_3/5_Confidence_0.400_Length_2348, vo_c3_Locus_239_Transcript_29/29_Confidence_0.182_Length_2208, vo_n3_Locus_2623_Transcript_15/17_Confidence_0.361_Length_1551, vo_c3_Locus_2347_Transcript_5/16_Confidence_0.514_Length_1554, vo_c3_Locus_239_Transcript_19/29_Confidence_0.295_Length_1502, vo_c2_Locus_2437_Transcript_25/25_Confidence_0.159_Length_1517, vo_n2_Locus_2252_Transcript_22/26_Confidence_0.256_Length_2337, vo_n2_Locus_2252_Transcript_23/26_Confidence_0.359_Length_1959, vo_c3_Locus_239_Transcript_10/29_Confidence_0.386_Length_1727, vo_c1_Locus_788_Transcript_6/34_Confidence_0.362_Length_1766, vo_c1_Locus_788_Transcript_22/34_Confidence_0.277_Length_1358, vo_n1_Locus_2248_Transcript_26/40_Confidence_0.333_Length_1991, tri_c_comp20571_c0_seq1, vo_n2_Locus_2252_Transcript_18/26_Confidence_0.256_Length_1506, vo_c1_Locus_788_Transcript_11/34_Confidence_0.213_Length_2514, vo_c2_Locus_907_Transcript_3/3_Confidence_0.333_Length_630, vo_n2_Locus_7087_Transcript_1/2_Confidence_0.500_Length_4087, vo_n1_Locus_2248_Transcript_2/40_Confidence_0.373_Length_1784, vo_n2_Locus_2980_Transcript_1/1_Confidence_0.333_Length_1623, vo_n2_Locus_9037_Transcript_9/15_Confidence_0.486_Length_4553, vo_c2_Locus_684_Transcript_7/16_Confidence_0.194_Length_2803, vo_n3_Locus_2293_Transcript_1/2_Confidence_0.750_Length_1794, vo_n3_Locus_1756_Transcript_10/15_Confidence_0.393_Length_2226, vo_c3_Locus_725_Transcript_6/15_Confidence_0.548_Length_5086, vo_n3_Locus_1756_Transcript_7/15_Confidence_0.250_Length_2226, vo_n2_Locus_16147_Transcript_1/1_Confidence_0.000_Length_1452, vo_n2_Locus_9037_Transcript_2/15_Confidence_0.257_Length_3951, vo_n2_Locus_9037_Transcript_13/15_Confidence_0.143_Length_1729, vo_n2_Locus_9037_Transcript_5/15_Confidence_0.286_Length_2279, vo_n2_Locus_9037_Transcript_6/15_Confidence_0.229_Length_2279, tri_c_comp19644_c0_seq1, vo_n2_Locus_171_Transcript_17/42_Confidence_0.229_Length_1803, tri_c_comp19644_c0_seq4, vo_c3_Locus_12256_Transcript_3/3_Confidence_0.000_Length_508, vo_c3_Locus_725_Transcript_12/15_Confidence_0.290_Length_3194, vo_c1_Locus_6543_Transcript_5/23_Confidence_0.220_Length_2294, vo_n2_Locus_9037_Transcript_12/15_Confidence_0.257_Length_2318, vo_c3_Locus_725_Transcript_13/15_Confidence_0.452_Length_4249, tri_n_comp19211_c0_seq1, vo_c3_Locus_883_Transcript_1/2_Confidence_1.000_Length_1783, vo_n2_Locus_9037_Transcript_1/15_Confidence_0.143_Length_1677, vo_c3_Locus_307_Transcript_2/21_Confidence_0.576_Length_1809, vo_n1_Locus_41_Transcript_20/90_Confidence_0.068_Length_2175, vo_c2_Locus_1667_Transcript_21/21_Confidence_0.195_Length_1788, vo_c3_Locus_550_Transcript_25/30_Confidence_0.321_Length_1640, vo_c3_Locus_550_Transcript_10/30_Confidence_0.420_Length_1515, vo_n1_Locus_133_Transcript_12/30_Confidence_0.033_Length_580, vo_c2_Locus_320_Transcript_7/32_Confidence_0.299_Length_1642, vo_c3_Locus_550_Transcript_27/30_Confidence_0.395_Length_1758, vo_c2_Locus_320_Transcript_9/32_Confidence_0.338_Length_1673, vo_c2_Locus_320_Transcript_22/32_Confidence_0.545_Length_1648, vo_c3_Locus_550_Transcript_30/30_Confidence_0.210_Length_1413, vo_c3_Locus_550_Transcript_8/30_Confidence_0.148_Length_1492, vo_n3_Locus_587_Transcript_13/22_Confidence_0.444_Length_1456, vo_n2_Locus_105_Transcript_30/33_Confidence_0.449_Length_1990, vo_c3_Locus_550_Transcript_28/30_Confidence_0.309_Length_1831, vo_c2_Locus_320_Transcript_20/32_Confidence_0.325_Length_1586, vo_n1_Locus_133_Transcript_30/30_Confidence_0.033_Length_2622, vo_c2_Locus_320_Transcript_13/32_Confidence_0.351_Length_2604, vo_c2_Locus_320_Transcript_15/32_Confidence_0.390_Length_1557, vo_c3_Locus_1613_Transcript_6/17_Confidence_0.158_Length_5809, vo_n1_Locus_10193_Transcript_1/1_Confidence_0.000_Length_1647, vo_c2_Locus_6348_Transcript_1/2_Confidence_1.000_Length_3755, vo_n3_Locus_23556_Transcript_2/4_Confidence_0.500_Length_4210, tri_c_comp43537_c0_seq1, vo_n3_Locus_9269_Transcript_1/1_Confidence_0.000_Length_2238, vo_c3_Locus_550_Transcript_25/30_Confidence_0.321_Length_1640, vo_c3_Locus_550_Transcript_10/30_Confidence_0.420_Length_1515, vo_n1_Locus_133_Transcript_12/30_Confidence_0.033_Length_580, vo_n2_Locus_13049_Transcript_20/20_Confidence_0.289_Length_1233, vo_c3_Locus_1015_Transcript_30/32_Confidence_0.181_Length_1172, vo_n2_Locus_13049_Transcript_19/20_Confidence_0.368_Length_1268, vo_c3_Locus_550_Transcript_27/30_Confidence_0.395_Length_1758, vo_n1_Locus_296_Transcript_24/31_Confidence_0.275_Length_1182, vo_n2_Locus_13049_Transcript_17/20_Confidence_0.342_Length_1329, vo_c3_Locus_1015_Transcript_13/32_Confidence_0.222_Length_1363, vo_c2_Locus_1551_Transcript_19/27_Confidence_0.222_Length_1248, vo_n1_Locus_296_Transcript_27/31_Confidence_0.078_Length_2886, vo_c3_Locus_1015_Transcript_3/32_Confidence_0.181_Length_1206, vo_n2_Locus_105_Transcript_30/33_Confidence_0.449_Length_1990, vo_c3_Locus_550_Transcript_28/30_Confidence_0.309_Length_1831,</p> |
|------------------------------|----------|----|---------------------------------------------------------------------------------------------------------------------------------------------------------------------------------------------------------------------------------------------------------------------------------------------------------------------------------------------------------------------------------------------------------------------------------------------------------------------------------------------------------------------------------------------------------------------------------------------------------------------------------------------------------------------------------------------------------------------------------------------------|----------------------------------------------------------------------|-----------------------------------------------------------------------------------------------------------------------------------------------------------------------------------------------------------------------------------------------------------------------------------------------------------------------------------------------------------------------------------------------------------------------------------------------------------------------------------------------------------------------------------------------------------------------------------------------------------------------------------------------------------------------------------------------------------------------------------------------------------------------------------------------------------------------------------------------------------------------------------------------------------------------------------------------------------------------------------------------------------------------------------------------------------------------------------------------------------------------------------------------------------------------------------------------------------------------------------------------------------------------------------------------------------------------------------------------------------------------------------------------------------------------------------------------------------------------------------------------------------------------------------------------------------------------------------------------------------------------------------------------------------------------------------------------------------------------------------------------------------------------------------------------------------------------------------------------------------------------------------------------------------------------------------------------------------------------------------------------------------------------------------------------------------------------------------------------------------------------------------------------------------------------------------------------------------------------------------------------------------------------------------------------------------------------------------------------------------------------------------------------------------------------------------------------------------------------------------------------------------------------------------------------------------------------------------------------------------------------------------------------------------------------------------------------------------------------------------------------------------------------------------------------------------------------------------------------------------------------------------------------------------------------------------------------------------------------------------------------------------------------------------------------------------------------------------------------------------------------------------------------------------------------------------------------------------------------------------------------------------------------------------------------------------------------------------------------------------------------------------------------------------------------------------------------------------------------------------------------------------------------------------------------------------------------------------------------------------------------------------------------------------------------------------------------------------------------------------------------------------------------------------------------------------------------------------------------------------------------------------------------------------------------------------------------------------------------------------------------------------------------------------------------------------------------------------------------------------------------------------------------------------------------------------------------------------------------------------------------------------------------------------------------------------------------------------------------------------------------------------------------------------------------------------------------------------------------------------------------------------------------------------------------------------------------------------------------------------------------------------------------------------------------------------------------------------------------------------------------------------------------------------------------------------------------------------------------------------------------------------------------------------------------------------------------------------------------------------------------------------------------------------------------------------------------------------------------------------------------------------------------------------------------------------------------------------------------------------------------------------------------------------------------------------------------------------------------------------------------------------------------------------------------------------------------------------------------------------------------------------------------------------------------------------------------------------------------------------------------------------------------------------------------------------------------------------------------------------------------------------------------------------------------------------------------------------------------------------------------------------------------------------------------------------------------------------------------------------------------------------------------------------------------------------------------------------------------------------------------------------------------------------------------------------------------------------------------------------------------------------------------------------------------------------------------------------------------------------------------------------------------------------------------------------------------------------------------------------------------------------------------------------------------------------------------------------------------------------------------------------------------------------------------------------------------------------------------------------------------------------------------------------------------------------------------------------------------------------------------------------------------------------------------------------------------------------------------------------------------------------------------------------------------------------------------------------------|

|  |  |  |  |                                                                                                                                                                                                                                                                                                                                                                                                                                                                                                                                                                                                                                                                                                                                                                                                                                                                                                                                                                                                                                                                                                                                                                                                                                                                                                                                                                                                                                                                                                                                                                                                                                                                                                                                                                                                                                                                                                                                                                                                                                                                                                                                                                                                                                                                                                                                                                                                                                                                                                                                                                                                                                                                                                                                                                                                                                                                                                                                                                                                                                                                                                                                                                                                                                                                                                                                                                                                                                                                                                                                                                                                                                                                                                                                                                                                                                                                                                                                                                                                                                                                                                                                                                                                                                                                                                                                                                                                                                                                                                                                                                                                                                                                                                                                                                                                                                                                                                                                                                                                                                                                                                                                                                                                                                                                                                                                                                                                                                                                                                                                                                                                                                                                                                                                                                                                                                                                                                                                                                                                                                                                                                                                                                                                                                                                                                                                                                                                                                                                                                                                                                                                                                                                                                                                                                                                                                                                                                                                                                                                                                                                                                       |
|--|--|--|--|-------------------------------------------------------------------------------------------------------------------------------------------------------------------------------------------------------------------------------------------------------------------------------------------------------------------------------------------------------------------------------------------------------------------------------------------------------------------------------------------------------------------------------------------------------------------------------------------------------------------------------------------------------------------------------------------------------------------------------------------------------------------------------------------------------------------------------------------------------------------------------------------------------------------------------------------------------------------------------------------------------------------------------------------------------------------------------------------------------------------------------------------------------------------------------------------------------------------------------------------------------------------------------------------------------------------------------------------------------------------------------------------------------------------------------------------------------------------------------------------------------------------------------------------------------------------------------------------------------------------------------------------------------------------------------------------------------------------------------------------------------------------------------------------------------------------------------------------------------------------------------------------------------------------------------------------------------------------------------------------------------------------------------------------------------------------------------------------------------------------------------------------------------------------------------------------------------------------------------------------------------------------------------------------------------------------------------------------------------------------------------------------------------------------------------------------------------------------------------------------------------------------------------------------------------------------------------------------------------------------------------------------------------------------------------------------------------------------------------------------------------------------------------------------------------------------------------------------------------------------------------------------------------------------------------------------------------------------------------------------------------------------------------------------------------------------------------------------------------------------------------------------------------------------------------------------------------------------------------------------------------------------------------------------------------------------------------------------------------------------------------------------------------------------------------------------------------------------------------------------------------------------------------------------------------------------------------------------------------------------------------------------------------------------------------------------------------------------------------------------------------------------------------------------------------------------------------------------------------------------------------------------------------------------------------------------------------------------------------------------------------------------------------------------------------------------------------------------------------------------------------------------------------------------------------------------------------------------------------------------------------------------------------------------------------------------------------------------------------------------------------------------------------------------------------------------------------------------------------------------------------------------------------------------------------------------------------------------------------------------------------------------------------------------------------------------------------------------------------------------------------------------------------------------------------------------------------------------------------------------------------------------------------------------------------------------------------------------------------------------------------------------------------------------------------------------------------------------------------------------------------------------------------------------------------------------------------------------------------------------------------------------------------------------------------------------------------------------------------------------------------------------------------------------------------------------------------------------------------------------------------------------------------------------------------------------------------------------------------------------------------------------------------------------------------------------------------------------------------------------------------------------------------------------------------------------------------------------------------------------------------------------------------------------------------------------------------------------------------------------------------------------------------------------------------------------------------------------------------------------------------------------------------------------------------------------------------------------------------------------------------------------------------------------------------------------------------------------------------------------------------------------------------------------------------------------------------------------------------------------------------------------------------------------------------------------------------------------------------------------------------------------------------------------------------------------------------------------------------------------------------------------------------------------------------------------------------------------------------------------------------------------------------------------------------------------------------------------------------------------------------------------------------------------------------------------------------------------------------|
|  |  |  |  | <p>vo_n3_Locus_150_Transcript_17/25_Confidence_0.183_Length_1185, vo_n3_Locus_150_Transcript_6/25_Confidence_0.232_Length_1192, vo_n1_Locus_133_Transcript_30/30_Confidence_0.033_Length_2622, tri_c_comp21115_c0_seq1, vo_n3_Locus_587_Transcript_2/22_Confidence_0.111_Length_206, vo_c2_Locus_320_Transcript_13/32_Confidence_0.351_Length_2604, vo_n1_Locus_296_Transcript_25/31_Confidence_0.157_Length_1180, vo_n2_Locus_13049_Transcript_7/20_Confidence_0.421_Length_1354, vo_c1_Locus_223_Transcript_13/65_Confidence_0.197_Length_1636, vo_c1_Locus_223_Transcript_47/65_Confidence_0.099_Length_1259, vo_c2_Locus_320_Transcript_7/32_Confidence_0.299_Length_1642, vo_n1_Locus_133_Transcript_14/30_Confidence_0.456_Length_2738, vo_c3_Locus_1015_Transcript_12/32_Confidence_0.222_Length_1270, vo_c2_Locus_320_Transcript_9/32_Confidence_0.338_Length_1673, vo_c2_Locus_320_Transcript_22/32_Confidence_0.545_Length_1648, vo_n1_Locus_296_Transcript_23/31_Confidence_0.294_Length_1182, vo_n2_Locus_13049_Transcript_9/20_Confidence_0.316_Length_1224, vo_c1_Locus_223_Transcript_52/65_Confidence_0.042_Length_799, vo_c3_Locus_550_Transcript_30/30_Confidence_0.210_Length_1413, vo_n1_Locus_133_Transcript_13/30_Confidence_0.456_Length_2508, vo_n1_Locus_133_Transcript_24/30_Confidence_0.311_Length_1984, vo_n1_Locus_296_Transcript_30/31_Confidence_0.078_Length_1319, vo_n1_Locus_133_Transcript_15/30_Confidence_0.456_Length_2671, vo_c2_Locus_320_Transcript_20/32_Confidence_0.325_Length_1586, vo_c1_Locus_223_Transcript_19/65_Confidence_0.092_Length_1454, vo_n1_Locus_296_Transcript_10/31_Confidence_0.118_Length_1164, vo_c1_Locus_223_Transcript_54/65_Confidence_0.134_Length_1458, vo_c2_Locus_320_Transcript_15/32_Confidence_0.390_Length_1557, vo_c3_Locus_1015_Transcript_9/32_Confidence_0.236_Length_1272, vo_n1_Locus_133_Transcript_25/30_Confidence_0.278_Length_2179, vo_n3_Locus_6810_Transcript_2/3_Confidence_0.913_Length_1699, vo_n1_Locus_6460_Transcript_1/1_Confidence_0.000_Length_1912, vo_c2_Locus_3634_Transcript_8/8_Confidence_0.133_Length_2428, vo_c2_Locus_324_Transcript_5/12_Confidence_0.333_Length_1009, vo_n1_Locus_5721_Transcript_6/9_Confidence_0.389_Length_989, vo_c2_Locus_324_Transcript_11/12_Confidence_0.333_Length_4393, vo_n2_Locus_475_Transcript_7/13_Confidence_0.312_Length_1141, vo_n1_Locus_5721_Transcript_1/9_Confidence_0.278_Length_986, vo_n2_Locus_475_Transcript_2/13_Confidence_0.312_Length_1187, vo_c2_Locus_324_Transcript_2/12_Confidence_0.400_Length_1106, vo_c3_Locus_3927_Transcript_2/9_Confidence_0.250_Length_2629, vo_n2_Locus_11241_Transcript_1/3_Confidence_0.600_Length_3773, vo_c2_Locus_479_Transcript_1/2_Confidence_1.000_Length_2154, tri_c_comp11242_c0_seq2, tri_n_comp64914_c0_seq1, vo_c2_Locus_9062_Transcript_10/11_Confidence_0.312_Length_4945, vo_n2_Locus_22224_Transcript_1/1_Confidence_0.000_Length_1370, tri_n_comp14915_c0_seq1, vo_n3_Locus_15713_Transcript_4/7_Confidence_0.429_Length_2557, tri_c_comp37399_c0_seq1, tri_n_comp58061_c0_seq1, vo_n1_Locus_22736_Transcript_1/2_Confidence_0.333_Length_1213, vo_n2_Locus_19677_Transcript_1/1_Confidence_0.000_Length_2823, tri_c_comp55340_c0_seq1, tri_n_comp58061_c0_seq1, tri_c_comp55340_c0_seq1, vo_n1_Locus_19864_Transcript_2/2_Confidence_0.000_Length_2707, vo_c3_Locus_21741_Transcript_5/9_Confidence_0.583_Length_1757, vo_n3_Locus_25600_Transcript_5/6_Confidence_0.375_Length_1777, tri_n_comp58061_c0_seq1, vo_c1_Locus_223_Transcript_52/65_Confidence_0.042_Length_799, vo_n2_Locus_13049_Transcript_20/20_Confidence_0.289_Length_1233, vo_c3_Locus_1015_Transcript_30/32_Confidence_0.181_Length_1172, vo_n2_Locus_13049_Transcript_19/20_Confidence_0.368_Length_1268, vo_n2_Locus_13049_Transcript_17/20_Confidence_0.342_Length_1329, vo_c3_Locus_1015_Transcript_9/32_Confidence_0.236_Length_1272, vo_n2_Locus_13049_Transcript_9/20_Confidence_0.316_Length_1224, vo_c3_Locus_1015_Transcript_13/32_Confidence_0.222_Length_1363, vo_n2_Locus_13049_Transcript_7/20_Confidence_0.421_Length_1354, vo_n1_Locus_565_Transcript_31/31_Confidence_0.178_Length_3922, vo_c3_Locus_2800_Transcript_3/23_Confidence_0.566_Length_1690, vo_c3_Locus_2800_Transcript_9/23_Confidence_0.585_Length_1396, tri_n_comp21653_c0_seq1, vo_n1_Locus_565_Transcript_5/31_Confidence_0.244_Length_1533, vo_n2_Locus_4661_Transcript_5/12_Confidence_0.208_Length_1240, vo_n1_Locus_565_Transcript_17/31_Confidence_0.422_Length_1454, vo_c3_Locus_2800_Transcript_5/23_Confidence_0.566_Length_2133, vo_c1_Locus_1757_Transcript_17/19_Confidence_0.375_Length_1367, vo_c1_Locus_298_Transcript_4/32_Confidence_0.255_Length_1585, vo_n1_Locus_8402_Transcript_3/4_Confidence_0.286_Length_1464, vo_c3_Locus_2800_Transcript_23/23_Confidence_0.151_Length_1466, vo_n2_Locus_903_Transcript_38/40_Confidence_0.222_Length_6612, vo_n1_Locus_565_Transcript_20/31_Confidence_0.444_Length_1622, vo_n2_Locus_2046_Transcript_7/18_Confidence_0.345_Length_1296, vo_c3_Locus_2800_Transcript_8/23_Confidence_0.585_Length_1344, vo_n3_Locus_1119_Transcript_19/50_Confidence_0.050_Length_498, vo_c2_Locus_5742_Transcript_10/21_Confidence_0.244_Length_1454, vo_n3_Locus_1119_Transcript_11/50_Confidence_0.124_Length_2839, vo_c2_Locus_5742_Transcript_18/21_Confidence_0.317_Length_2233, vo_n1_Locus_565_Transcript_13/31_Confidence_0.378_Length_1400, vo_c3_Locus_2800_Transcript_14/23_Confidence_0.321_Length_1426, vo_c3_Locus_614_Transcript_19/24_Confidence_0.394_Length_3443, vo_c2_Locus_358_Transcript_1/41_Confidence_0.080_Length_1708, vo_c2_Locus_5742_Transcript_14/21_Confidence_0.439_Length_2413, vo_c1_Locus_1757_Transcript_8/19_Confidence_0.458_Length_1460, vo_n1_Locus_986_Transcript_16/36_Confidence_0.211_Length_1811, vo_n1_Locus_565_Transcript_16/31_Confidence_0.400_Length_1499, vo_n2_Locus_903_Transcript_37/40_Confidence_0.346_Length_3926, tri_c_comp20312_c0_seq4, vo_c3_Locus_614_Transcript_13/24_Confidence_0.061_Length_4970, vo_n2_Locus_2046_Transcript_11/18_Confidence_0.310_Length_1666, vo_n2_Locus_903_Transcript_31/40_Confidence_0.321_Length_2251, vo_n1_Locus_565_Transcript_30/31_Confidence_0.422_Length_3814, vo_c3_Locus_614_Transcript_2/24_Confidence_0.485_Length_1777, vo_n1_Locus_5148_Transcript_1/4_Confidence_0.667_Length_1983, vo_c1_Locus_10454_Transcript_1/2_Confidence_0.750_Length_1441, vo_n3_Locus_1119_Transcript_18/50_Confidence_0.149_Length_1959, tri_c_comp10536_c0_seq1, vo_c2_Locus_32726_Transcript_2/2_Confidence_0.000_Length_696, vo_c2_Locus_40594_Transcript_2/3_Confidence_0.500_Length_1728, vo_n2_Locus_39295_Transcript_2/2_Confidence_0.500_Length_1939, vo_c2_Locus_6460_Transcript_1/2_Confidence_1.000_Length_1563, vo_n1_Locus_3261_Transcript_3/4_Confidence_0.667_Length_1633, vo_n3_Locus_27_Transcript_1/1_Confidence_0.000_Length_1278, tri_c_comp23875_c0_seq1, tri_c_comp24147_c0_seq1, vo_c1_Locus_4576_Transcript_2/2_Confidence_0.000_Length_1644, tri_n_comp18813_c0_seq8,</p> |
|--|--|--|--|-------------------------------------------------------------------------------------------------------------------------------------------------------------------------------------------------------------------------------------------------------------------------------------------------------------------------------------------------------------------------------------------------------------------------------------------------------------------------------------------------------------------------------------------------------------------------------------------------------------------------------------------------------------------------------------------------------------------------------------------------------------------------------------------------------------------------------------------------------------------------------------------------------------------------------------------------------------------------------------------------------------------------------------------------------------------------------------------------------------------------------------------------------------------------------------------------------------------------------------------------------------------------------------------------------------------------------------------------------------------------------------------------------------------------------------------------------------------------------------------------------------------------------------------------------------------------------------------------------------------------------------------------------------------------------------------------------------------------------------------------------------------------------------------------------------------------------------------------------------------------------------------------------------------------------------------------------------------------------------------------------------------------------------------------------------------------------------------------------------------------------------------------------------------------------------------------------------------------------------------------------------------------------------------------------------------------------------------------------------------------------------------------------------------------------------------------------------------------------------------------------------------------------------------------------------------------------------------------------------------------------------------------------------------------------------------------------------------------------------------------------------------------------------------------------------------------------------------------------------------------------------------------------------------------------------------------------------------------------------------------------------------------------------------------------------------------------------------------------------------------------------------------------------------------------------------------------------------------------------------------------------------------------------------------------------------------------------------------------------------------------------------------------------------------------------------------------------------------------------------------------------------------------------------------------------------------------------------------------------------------------------------------------------------------------------------------------------------------------------------------------------------------------------------------------------------------------------------------------------------------------------------------------------------------------------------------------------------------------------------------------------------------------------------------------------------------------------------------------------------------------------------------------------------------------------------------------------------------------------------------------------------------------------------------------------------------------------------------------------------------------------------------------------------------------------------------------------------------------------------------------------------------------------------------------------------------------------------------------------------------------------------------------------------------------------------------------------------------------------------------------------------------------------------------------------------------------------------------------------------------------------------------------------------------------------------------------------------------------------------------------------------------------------------------------------------------------------------------------------------------------------------------------------------------------------------------------------------------------------------------------------------------------------------------------------------------------------------------------------------------------------------------------------------------------------------------------------------------------------------------------------------------------------------------------------------------------------------------------------------------------------------------------------------------------------------------------------------------------------------------------------------------------------------------------------------------------------------------------------------------------------------------------------------------------------------------------------------------------------------------------------------------------------------------------------------------------------------------------------------------------------------------------------------------------------------------------------------------------------------------------------------------------------------------------------------------------------------------------------------------------------------------------------------------------------------------------------------------------------------------------------------------------------------------------------------------------------------------------------------------------------------------------------------------------------------------------------------------------------------------------------------------------------------------------------------------------------------------------------------------------------------------------------------------------------------------------------------------------------------------------------------------------------------------------------------------------------------------------|

|  |  |  |  |  |                                                                                                                                                                                                                                                                                                                                                                                                                                                                                                                                                                                                                                                                                                                                                                                                                                                                                                                                                                                                                                                                                                                                                                                                                                                                                                                                                                                                                                                                                                                                                                                                                                                                                                                                                   |
|--|--|--|--|--|---------------------------------------------------------------------------------------------------------------------------------------------------------------------------------------------------------------------------------------------------------------------------------------------------------------------------------------------------------------------------------------------------------------------------------------------------------------------------------------------------------------------------------------------------------------------------------------------------------------------------------------------------------------------------------------------------------------------------------------------------------------------------------------------------------------------------------------------------------------------------------------------------------------------------------------------------------------------------------------------------------------------------------------------------------------------------------------------------------------------------------------------------------------------------------------------------------------------------------------------------------------------------------------------------------------------------------------------------------------------------------------------------------------------------------------------------------------------------------------------------------------------------------------------------------------------------------------------------------------------------------------------------------------------------------------------------------------------------------------------------|
|  |  |  |  |  | <p>tri_c_comp19022_c0_seq2, vo_n2_Locus_106_Transcript_27/30_Confidence_0.078_Length_2735,<br/>vo_c2_Locus_2699_Transcript_2/7_Confidence_0.471_Length_1721, vo_n2_Locus_106_Transcript_24/30_Confidence_0.219_Length_3708,<br/>vo_n3_Locus_362_Transcript_1/4_Confidence_0.727_Length_3306, vo_n3_Locus_3996_Transcript_1/4_Confidence_0.417_Length_1642,<br/>vo_n1_Locus_3710_Transcript_9/10_Confidence_0.500_Length_1616, vo_n2_Locus_106_Transcript_25/30_Confidence_0.188_Length_2659,<br/>vo_n2_Locus_1384_Transcript_2/5_Confidence_0.308_Length_2123, vo_n3_Locus_3996_Transcript_3/4_Confidence_0.500_Length_3581,<br/>tri_n_comp18813_c0_seq3, vo_c1_Locus_6488_Transcript_4/4_Confidence_0.250_Length_8239,<br/>vo_c2_Locus_1551_Transcript_20/27_Confidence_0.238_Length_2634, tri_n_comp18813_c0_seq13,<br/>vo_n3_Locus_685_Transcript_7/8_Confidence_0.353_Length_1680, vo_n2_Locus_1324_Transcript_10/14_Confidence_0.296_Length_1766,<br/>vo_c3_Locus_1613_Transcript_6/17_Confidence_0.158_Length_5809, vo_n3_Locus_685_Transcript_3/8_Confidence_0.471_Length_1755,<br/>vo_c2_Locus_16827_Transcript_1/1_Confidence_0.000_Length_1783, vo_n3_Locus_362_Transcript_3/4_Confidence_0.364_Length_3895,<br/>vo_c3_Locus_1613_Transcript_11/17_Confidence_0.316_Length_2455, tri_c_comp13285_c0_seq1, tri_n_comp18813_c0_seq13,<br/>vo_c2_Locus_23037_Transcript_2/2_Confidence_0.000_Length_2109, vo_n3_Locus_362_Transcript_3/4_Confidence_0.364_Length_3895,<br/>vo_n3_Locus_362_Transcript_1/4_Confidence_0.727_Length_3306, vo_n1_Locus_5208_Transcript_2/2_Confidence_0.000_Length_2077,<br/>vo_c2_Locus_23037_Transcript_1/2_Confidence_0.750_Length_1965, vo_n3_Locus_15336_Transcript_1/1_Confidence_0.000_Length_1810</p> |
|--|--|--|--|--|---------------------------------------------------------------------------------------------------------------------------------------------------------------------------------------------------------------------------------------------------------------------------------------------------------------------------------------------------------------------------------------------------------------------------------------------------------------------------------------------------------------------------------------------------------------------------------------------------------------------------------------------------------------------------------------------------------------------------------------------------------------------------------------------------------------------------------------------------------------------------------------------------------------------------------------------------------------------------------------------------------------------------------------------------------------------------------------------------------------------------------------------------------------------------------------------------------------------------------------------------------------------------------------------------------------------------------------------------------------------------------------------------------------------------------------------------------------------------------------------------------------------------------------------------------------------------------------------------------------------------------------------------------------------------------------------------------------------------------------------------|

|                                             |          |    |                                                                                                                                                                                                                                                                                                                                                                                                                                                                                                                                                                                                                                               |                                                                      |                                                                                                                                                                                                                                                                                                                                                                                                                                                                                                                                                                                                                                                                                                                                                                                                                                                                                                                                                                                                                                                                                                                                                                                                                                                                                                                                                                                                                                                                                                                                                                                                                                                                                                                                                                                                                                                                                                                                                                                                                                                                                                                                                                                                                                                                                                                                                                                                                                                                                                                                                                                                                                                                                                                                                                                                                                                                                                                                                                                                                                                                                                                                                                                                                                                                                                                                                                                                                                                                                                                                                                                                                                                                                                                                                                                                                                                                                                                                                                                  |
|---------------------------------------------|----------|----|-----------------------------------------------------------------------------------------------------------------------------------------------------------------------------------------------------------------------------------------------------------------------------------------------------------------------------------------------------------------------------------------------------------------------------------------------------------------------------------------------------------------------------------------------------------------------------------------------------------------------------------------------|----------------------------------------------------------------------|----------------------------------------------------------------------------------------------------------------------------------------------------------------------------------------------------------------------------------------------------------------------------------------------------------------------------------------------------------------------------------------------------------------------------------------------------------------------------------------------------------------------------------------------------------------------------------------------------------------------------------------------------------------------------------------------------------------------------------------------------------------------------------------------------------------------------------------------------------------------------------------------------------------------------------------------------------------------------------------------------------------------------------------------------------------------------------------------------------------------------------------------------------------------------------------------------------------------------------------------------------------------------------------------------------------------------------------------------------------------------------------------------------------------------------------------------------------------------------------------------------------------------------------------------------------------------------------------------------------------------------------------------------------------------------------------------------------------------------------------------------------------------------------------------------------------------------------------------------------------------------------------------------------------------------------------------------------------------------------------------------------------------------------------------------------------------------------------------------------------------------------------------------------------------------------------------------------------------------------------------------------------------------------------------------------------------------------------------------------------------------------------------------------------------------------------------------------------------------------------------------------------------------------------------------------------------------------------------------------------------------------------------------------------------------------------------------------------------------------------------------------------------------------------------------------------------------------------------------------------------------------------------------------------------------------------------------------------------------------------------------------------------------------------------------------------------------------------------------------------------------------------------------------------------------------------------------------------------------------------------------------------------------------------------------------------------------------------------------------------------------------------------------------------------------------------------------------------------------------------------------------------------------------------------------------------------------------------------------------------------------------------------------------------------------------------------------------------------------------------------------------------------------------------------------------------------------------------------------------------------------------------------------------------------------------------------------------------------------|
| Alanine, aspartate and glutamate metabolism | map00250 | 20 | <p>ec:2.6.1.16 - transaminase (isomerizing), ec:2.6.1.19 - transaminase, ec:6.3.1.1 - ligase, ec:6.3.1.2 - synthetase, ec:1.2.1.24 - dehydrogenase (NAD+), ec:4.3.2.1 - lyase, ec:4.3.2.2 - lyase, ec:2.1.3.2 - carbamoyltransferase, ec:2.6.1.44 - transaminase, ec:1.2.1.16 - dehydrogenase [NAD(P)+], ec:2.6.1.1 - transaminase, ec:6.3.5.4 - synthase (glutamine-hydrolysing), ec:6.3.5.5 - synthase (glutamine-hydrolysing), ec:1.4.1.2 - dehydrogenase, ec:3.5.1.1 - asparaginase II, ec:6.3.4.4 - synthase, ec:6.3.4.5 - synthase, ec:6.3.4.16 - synthase (ammonia), ec:1.4.1.14 - synthase (NADH), ec:1.4.1.13 - synthase (NADPH)</p> | <p>1, 2, 1, 15, 1, 1, 1, 3, 2, 1, 4, 3, 2, 1, 3, 1, 1, 2, 15, 10</p> | <p>vo_n2_Locus_1408_Transcript_4/5_Confidence_0.222_Length_11768, vo_c3_Locus_29526_Transcript_7/10_Confidence_0.268_Length_874, vo_c2_Locus_844_Transcript_5/40_Confidence_0.162_Length_2081, vo_n1_Locus_210_Transcript_2/3_Confidence_0.571_Length_2158, vo_c1_Locus_1340_Transcript_12/17_Confidence_0.109_Length_2389, vo_c1_Locus_1340_Transcript_9/17_Confidence_0.172_Length_2429, tri_n_comp11684_c0_seq1, vo_c1_Locus_4136_Transcript_1/2_Confidence_0.967_Length_2259, vo_c2_Locus_6408_Transcript_2/14_Confidence_0.268_Length_1478, vo_n1_Locus_335_Transcript_2/3_Confidence_0.909_Length_2286, vo_c2_Locus_3512_Transcript_3/4_Confidence_0.500_Length_2501, vo_n2_Locus_4820_Transcript_2/3_Confidence_0.545_Length_2376, vo_n3_Locus_2644_Transcript_11/11_Confidence_0.323_Length_2390, vo_n2_Locus_515_Transcript_8/9_Confidence_0.471_Length_3194, vo_n2_Locus_515_Transcript_7/9_Confidence_0.176_Length_2355, vo_c2_Locus_3512_Transcript_2/4_Confidence_0.750_Length_2320, vo_c3_Locus_1501_Transcript_6/9_Confidence_0.203_Length_2420, vo_n2_Locus_5127_Transcript_1/3_Confidence_0.200_Length_1636, vo_n2_Locus_22912_Transcript_1/2_Confidence_0.333_Length_2481, vo_c1_Locus_24159_Transcript_1/2_Confidence_0.333_Length_1573, vo_c2_Locus_18300_Transcript_2/3_Confidence_0.200_Length_1671, vo_n2_Locus_9167_Transcript_1/4_Confidence_0.286_Length_6748, tri_n_comp27462_c0_seq1, tri_c_comp33901_c0_seq1, vo_n2_Locus_5805_Transcript_1/2_Confidence_0.333_Length_5227, vo_c3_Locus_33872_Transcript_1/1_Confidence_0.000_Length_1446, vo_c1_Locus_7220_Transcript_2/3_Confidence_0.400_Length_2898, vo_c1_Locus_24159_Transcript_1/2_Confidence_0.333_Length_1573, vo_n1_Locus_3423_Transcript_2/4_Confidence_0.250_Length_1347, tri_n_comp27683_c0_seq1, vo_c1_Locus_3127_Transcript_1/1_Confidence_0.000_Length_1478, vo_n1_Locus_3423_Transcript_3/4_Confidence_0.250_Length_1416, vo_c3_Locus_29578_Transcript_2/4_Confidence_0.800_Length_3844, vo_c1_Locus_12300_Transcript_2/4_Confidence_0.375_Length_3857, vo_n1_Locus_210_Transcript_2/3_Confidence_0.571_Length_2158, tri_c_comp33901_c0_seq1, vo_n2_Locus_5805_Transcript_1/2_Confidence_0.333_Length_5227, tri_c_comp28026_c0_seq1, tri_c_comp3336_c0_seq2, tri_n_comp8685_c0_seq2, tri_c_comp3336_c0_seq1, tri_n_comp32103_c0_seq1, vo_c2_Locus_2824_Transcript_1/6_Confidence_0.533_Length_1586, tri_c_comp33901_c0_seq1, vo_n2_Locus_5805_Transcript_1/2_Confidence_0.333_Length_5227, vo_c1_Locus_13166_Transcript_27/32_Confidence_0.394_Length_6627, vo_c3_Locus_3082_Transcript_7/7_Confidence_0.167_Length_5439, vo_n1_Locus_991_Transcript_1/21_Confidence_0.113_Length_1473, tri_c_comp19198_c0_seq1, vo_n3_Locus_4402_Transcript_3/18_Confidence_0.269_Length_6798, vo_c2_Locus_4368_Transcript_2/25_Confidence_0.375_Length_6775, vo_n2_Locus_3_Transcript_20516/24291_Confidence_0.000_Length_6564, vo_n3_Locus_4402_Transcript_4/18_Confidence_0.077_Length_491, vo_c1_Locus_13166_Transcript_10/32_Confidence_0.076_Length_628, vo_c1_Locus_13166_Transcript_28/32_Confidence_0.409_Length_6630, vo_n1_Locus_7772_Transcript_1/1_Confidence_0.000_Length_6986, tri_c_comp19198_c0_seq4, tri_c_comp19198_c0_seq3, vo_c3_Locus_3082_Transcript_5/7_Confidence_0.333_Length_2051, vo_c1_Locus_1115_Transcript_3/3_Confidence_0.000_Length_916, vo_c2_Locus_4368_Transcript_2/25_Confidence_0.375_Length_6775, vo_c1_Locus_13166_Transcript_27/32_Confidence_0.394_Length_6627, vo_n2_Locus_3_Transcript_20516/24291_Confidence_0.000_Length_6564, vo_c3_Locus_3082_Transcript_7/7_Confidence_0.167_Length_5439, vo_n1_Locus_991_Transcript_1/21_Confidence_0.113_Length_1473, tri_c_comp19198_c0_seq1, vo_c1_Locus_13166_Transcript_28/32_Confidence_0.409_Length_6630, vo_n1_Locus_7772_Transcript_1/1_Confidence_0.000_Length_6986, vo_n3_Locus_4402_Transcript_3/18_Confidence_0.269_Length_6798, vo_c3_Locus_3082_Transcript_5/7_Confidence_0.333_Length_2051</p> |
|---------------------------------------------|----------|----|-----------------------------------------------------------------------------------------------------------------------------------------------------------------------------------------------------------------------------------------------------------------------------------------------------------------------------------------------------------------------------------------------------------------------------------------------------------------------------------------------------------------------------------------------------------------------------------------------------------------------------------------------|----------------------------------------------------------------------|----------------------------------------------------------------------------------------------------------------------------------------------------------------------------------------------------------------------------------------------------------------------------------------------------------------------------------------------------------------------------------------------------------------------------------------------------------------------------------------------------------------------------------------------------------------------------------------------------------------------------------------------------------------------------------------------------------------------------------------------------------------------------------------------------------------------------------------------------------------------------------------------------------------------------------------------------------------------------------------------------------------------------------------------------------------------------------------------------------------------------------------------------------------------------------------------------------------------------------------------------------------------------------------------------------------------------------------------------------------------------------------------------------------------------------------------------------------------------------------------------------------------------------------------------------------------------------------------------------------------------------------------------------------------------------------------------------------------------------------------------------------------------------------------------------------------------------------------------------------------------------------------------------------------------------------------------------------------------------------------------------------------------------------------------------------------------------------------------------------------------------------------------------------------------------------------------------------------------------------------------------------------------------------------------------------------------------------------------------------------------------------------------------------------------------------------------------------------------------------------------------------------------------------------------------------------------------------------------------------------------------------------------------------------------------------------------------------------------------------------------------------------------------------------------------------------------------------------------------------------------------------------------------------------------------------------------------------------------------------------------------------------------------------------------------------------------------------------------------------------------------------------------------------------------------------------------------------------------------------------------------------------------------------------------------------------------------------------------------------------------------------------------------------------------------------------------------------------------------------------------------------------------------------------------------------------------------------------------------------------------------------------------------------------------------------------------------------------------------------------------------------------------------------------------------------------------------------------------------------------------------------------------------------------------------------------------------------------------------|

|                       |          |    |                                                                                                                                                                                                                                                                                                                                                                                                                                                                                                                                                                                                                                                              |                                                                     |                                                                                                                                                                                                                                                                                                                                                                                                                                                                                                                                                                                                                                                                                                                                                                                                                                                                                                                                                                                                                                                                                                                                                                                                                                                                                                                                                                                                                                                                                                                                                                                                                                                                                                                                                                                                                                                                                                                                                                                                                                                                                                                                                                                                                                                                                                                                                                                                                                                                                                                                                                                                                                                                                                                                                                                                                                                                                                                                                                                                                                                                                                                                                                                                                                                                                                                                                                                                                                                                                                                                                                                                                                                                                                                                                                                                                                                                                                                                                                                                                                                                                                                                                                                                                                                                                                                                                                                                                                                                                                                                                                                                                                                                                                                                                                                                                                                                                                                                                                                                                                                                                                                                                                                                                                                                                                                                                                                                                                                                                                                                                                                                                                                                                                                                                                                                                                                                                                                                                                                                             |
|-----------------------|----------|----|--------------------------------------------------------------------------------------------------------------------------------------------------------------------------------------------------------------------------------------------------------------------------------------------------------------------------------------------------------------------------------------------------------------------------------------------------------------------------------------------------------------------------------------------------------------------------------------------------------------------------------------------------------------|---------------------------------------------------------------------|-------------------------------------------------------------------------------------------------------------------------------------------------------------------------------------------------------------------------------------------------------------------------------------------------------------------------------------------------------------------------------------------------------------------------------------------------------------------------------------------------------------------------------------------------------------------------------------------------------------------------------------------------------------------------------------------------------------------------------------------------------------------------------------------------------------------------------------------------------------------------------------------------------------------------------------------------------------------------------------------------------------------------------------------------------------------------------------------------------------------------------------------------------------------------------------------------------------------------------------------------------------------------------------------------------------------------------------------------------------------------------------------------------------------------------------------------------------------------------------------------------------------------------------------------------------------------------------------------------------------------------------------------------------------------------------------------------------------------------------------------------------------------------------------------------------------------------------------------------------------------------------------------------------------------------------------------------------------------------------------------------------------------------------------------------------------------------------------------------------------------------------------------------------------------------------------------------------------------------------------------------------------------------------------------------------------------------------------------------------------------------------------------------------------------------------------------------------------------------------------------------------------------------------------------------------------------------------------------------------------------------------------------------------------------------------------------------------------------------------------------------------------------------------------------------------------------------------------------------------------------------------------------------------------------------------------------------------------------------------------------------------------------------------------------------------------------------------------------------------------------------------------------------------------------------------------------------------------------------------------------------------------------------------------------------------------------------------------------------------------------------------------------------------------------------------------------------------------------------------------------------------------------------------------------------------------------------------------------------------------------------------------------------------------------------------------------------------------------------------------------------------------------------------------------------------------------------------------------------------------------------------------------------------------------------------------------------------------------------------------------------------------------------------------------------------------------------------------------------------------------------------------------------------------------------------------------------------------------------------------------------------------------------------------------------------------------------------------------------------------------------------------------------------------------------------------------------------------------------------------------------------------------------------------------------------------------------------------------------------------------------------------------------------------------------------------------------------------------------------------------------------------------------------------------------------------------------------------------------------------------------------------------------------------------------------------------------------------------------------------------------------------------------------------------------------------------------------------------------------------------------------------------------------------------------------------------------------------------------------------------------------------------------------------------------------------------------------------------------------------------------------------------------------------------------------------------------------------------------------------------------------------------------------------------------------------------------------------------------------------------------------------------------------------------------------------------------------------------------------------------------------------------------------------------------------------------------------------------------------------------------------------------------------------------------------------------------------------------------------------------------------|
| Propanoate metabolism | map00640 | 20 | <p>ec:6.4.1.2 - carboxylase, ec:2.6.1.18 - transaminase, ec:2.6.1.19 - transaminase, ec:4.1.3.30 - lyase, ec:1.2.1.27 - dehydrogenase (CoA-acylating), ec:6.2.1.5 - ligase (ADP-forming), ec:6.2.1.4 - ligase (GDP-forming), ec:6.2.1.1 - ligase, ec:1.2.1.18 - dehydrogenase (acetylating), ec:4.2.1.79 - dehydratase, ec:4.2.1.99 - dehydratase, ec:1.8.1.4 - dehydrogenase, ec:2.3.1.9 - C-acetyltransferase, ec:4.1.1.9 - decarboxylase, ec:2.3.1.54 - C-acetyltransferase, ec:2.8.3.8 - CoA-transferase, ec:3.1.2.4 - hydrolase, ec:4.2.1.17 - hydratase, ec:1.1.1.202 - dehydrogenase, ec:1.2.4.4 - dehydrogenase (2-methylpropanoyl-transferring)</p> | <p>16, 1, 2, 3, 3, 28, 6, 1, 3, 1, 7, 2, 2, 1, 9, 1, 1, 7, 1, 1</p> | <p>vo_n3_Locus_484_Transcript_6/12_Confidence_0.250_Length_1533, vo_c3_Locus_17332_Transcript_1/1_Confidence_0.333_Length_6493, vo_n3_Locus_696_Transcript_20/35_Confidence_0.473_Length_5396, vo_c3_Locus_2164_Transcript_38/39_Confidence_0.292_Length_6879, tri_n_comp41552_c0_seq1, vo_c2_Locus_1509_Transcript_1/47_Confidence_0.149_Length_2731, vo_c2_Locus_2193_Transcript_1/3_Confidence_0.667_Length_1218, vo_c1_Locus_860_Transcript_10/29_Confidence_0.571_Length_6744, vo_c2_Locus_1509_Transcript_11/47_Confidence_0.164_Length_2686, vo_n2_Locus_1751_Transcript_51/59_Confidence_0.207_Length_3566, vo_n2_Locus_15097_Transcript_1/1_Confidence_0.000_Length_3935, vo_n3_Locus_484_Transcript_5/12_Confidence_0.250_Length_1451, vo_c1_Locus_860_Transcript_11/29_Confidence_0.571_Length_6741, tri_c_comp19913_c0_seq3, vo_n2_Locus_1751_Transcript_37/59_Confidence_0.195_Length_3437, vo_c2_Locus_1509_Transcript_6/47_Confidence_0.149_Length_2592, vo_c1_Locus_7220_Transcript_2/3_Confidence_0.400_Length_2898, vo_c3_Locus_29526_Transcript_7/10_Confidence_0.268_Length_874, vo_c2_Locus_844_Transcript_5/40_Confidence_0.162_Length_2081, vo_c3_Locus_145_Transcript_31/32_Confidence_0.014_Length_533, vo_n1_Locus_1163_Transcript_28/49_Confidence_0.319_Length_2335, vo_n2_Locus_29491_Transcript_1/2_Confidence_0.333_Length_1144, vo_c3_Locus_1581_Transcript_3/3_Confidence_0.000_Length_1736, vo_c1_Locus_1298_Transcript_3/6_Confidence_0.625_Length_1775, vo_n2_Locus_157_Transcript_2/4_Confidence_0.286_Length_2059, vo_c1_Locus_2207_Transcript_20/51_Confidence_0.393_Length_3556, vo_c3_Locus_2283_Transcript_28/38_Confidence_0.331_Length_3501, vo_n3_Locus_1164_Transcript_30/46_Confidence_0.400_Length_3745, tri_c_comp20184_c0_seq2, vo_c2_Locus_7270_Transcript_1/1_Confidence_0.500_Length_1488, vo_c1_Locus_31_Transcript_859/1155_Confidence_0.002_Length_1257, vo_n3_Locus_1164_Transcript_32/46_Confidence_0.456_Length_3745, vo_n1_Locus_3448_Transcript_46/64_Confidence_0.085_Length_783, vo_c2_Locus_644_Transcript_12/40_Confidence_0.459_Length_3665, vo_n3_Locus_1164_Transcript_35/46_Confidence_0.511_Length_3745, vo_c3_Locus_5_Transcript_229/353_Confidence_0.004_Length_952, vo_c2_Locus_644_Transcript_3/40_Confidence_0.071_Length_957, vo_n1_Locus_3448_Transcript_53/64_Confidence_0.225_Length_3567, vo_n2_Locus_386_Transcript_32/33_Confidence_0.208_Length_3664, vo_n1_Locus_3448_Transcript_63/64_Confidence_0.318_Length_3637, vo_n3_Locus_1164_Transcript_33/46_Confidence_0.456_Length_3748, vo_c3_Locus_2283_Transcript_26/38_Confidence_0.285_Length_3501, vo_n2_Locus_386_Transcript_22/33_Confidence_0.376_Length_3568, vo_c3_Locus_2283_Transcript_29/38_Confidence_0.292_Length_3501, vo_n2_Locus_386_Transcript_1/33_Confidence_0.139_Length_3600, vo_c2_Locus_644_Transcript_24/40_Confidence_0.398_Length_3511, vo_n3_Locus_1164_Transcript_43/46_Confidence_0.389_Length_3338, vo_c1_Locus_2207_Transcript_39/51_Confidence_0.250_Length_3586, vo_c3_Locus_79_Transcript_1/3_Confidence_0.200_Length_5222, vo_c2_Locus_52_Transcript_234/466_Confidence_0.003_Length_1462, vo_n2_Locus_386_Transcript_10/33_Confidence_0.376_Length_3676, vo_n1_Locus_1394_Transcript_2/3_Confidence_0.400_Length_2232, tri_n_comp19507_c0_seq6, vo_c3_Locus_79_Transcript_1/3_Confidence_0.200_Length_5222, vo_n1_Locus_1394_Transcript_2/3_Confidence_0.400_Length_2232, vo_n2_Locus_2182_Transcript_14/15_Confidence_0.458_Length_3129, vo_c1_Locus_1462_Transcript_1/46_Confidence_0.182_Length_2129, vo_c1_Locus_1462_Transcript_8/46_Confidence_0.530_Length_9104, vo_c2_Locus_642_Transcript_3/10_Confidence_0.571_Length_2141, vo_n3_Locus_9269_Transcript_1/1_Confidence_0.000_Length_2238, vo_c3_Locus_1581_Transcript_3/3_Confidence_0.000_Length_1736, vo_c1_Locus_1298_Transcript_3/6_Confidence_0.625_Length_1775, vo_n2_Locus_157_Transcript_2/4_Confidence_0.286_Length_2059, vo_n2_Locus_3116_Transcript_1/3_Confidence_0.750_Length_2885, tri_n_comp15079_c0_seq3, vo_c1_Locus_2380_Transcript_17/17_Confidence_0.086_Length_3951, vo_c2_Locus_191_Transcript_2/2_Confidence_0.167_Length_3106, tri_c_comp21028_c0_seq2, tri_c_comp21028_c0_seq3, vo_c2_Locus_354_Transcript_3/17_Confidence_0.667_Length_4966, vo_n1_Locus_30469_Transcript_2/2_Confidence_0.000_Length_979, vo_n3_Locus_6810_Transcript_2/3_Confidence_0.913_Length_1699, vo_n1_Locus_6460_Transcript_1/1_Confidence_0.000_Length_1912, vo_c1_Locus_2657_Transcript_1/1_Confidence_0.000_Length_1513, vo_n2_Locus_23058_Transcript_1/1_Confidence_0.000_Length_1342, vo_c2_Locus_22623_Transcript_1/1_Confidence_0.000_Length_1765, vo_c3_Locus_1564_Transcript_1/27_Confidence_0.474_Length_3491, vo_n2_Locus_4549_Transcript_18/24_Confidence_0.395_Length_3486, vo_c1_Locus_1748_Transcript_10/39_Confidence_0.197_Length_3498, vo_c1_Locus_1748_Transcript_19/39_Confidence_0.211_Length_3788, vo_c1_Locus_1748_Transcript_30/39_Confidence_0.282_Length_4645, vo_n2_Locus_4549_Transcript_11/24_Confidence_0.474_Length_3796, vo_n1_Locus_103_Transcript_17/28_Confidence_0.483_Length_3469, vo_n3_Locus_2375_Transcript_13/19_Confidence_0.467_Length_3465, vo_c3_Locus_1564_Transcript_22/27_Confidence_0.526_Length_3527, vo_c2_Locus_6864_Transcript_3/5_Confidence_0.667_Length_1701, vo_c3_Locus_6234_Transcript_1/1_Confidence_0.000_Length_1326, vo_c2_Locus_2261_Transcript_1/2_Confidence_1.000_Length_2564, vo_c3_Locus_5948_Transcript_1/1_Confidence_0.000_Length_1027, vo_n2_Locus_16945_Transcript_1/3_Confidence_0.500_Length_1084, vo_c3_Locus_9925_Transcript_8/11_Confidence_0.263_Length_3550, vo_n1_Locus_11137_Transcript_5/5_Confidence_0.143_Length_2829, vo_n2_Locus_16945_Transcript_3/3_Confidence_0.000_Length_746, vo_n2_Locus_30747_Transcript_1/1_Confidence_0.000_Length_951, vo_n2_Locus_7435_Transcript_1/1_Confidence_0.000_Length_1552, vo_c1_Locus_5714_Transcript_2/3_Confidence_0.714_Length_2588</p> |
|-----------------------|----------|----|--------------------------------------------------------------------------------------------------------------------------------------------------------------------------------------------------------------------------------------------------------------------------------------------------------------------------------------------------------------------------------------------------------------------------------------------------------------------------------------------------------------------------------------------------------------------------------------------------------------------------------------------------------------|---------------------------------------------------------------------|-------------------------------------------------------------------------------------------------------------------------------------------------------------------------------------------------------------------------------------------------------------------------------------------------------------------------------------------------------------------------------------------------------------------------------------------------------------------------------------------------------------------------------------------------------------------------------------------------------------------------------------------------------------------------------------------------------------------------------------------------------------------------------------------------------------------------------------------------------------------------------------------------------------------------------------------------------------------------------------------------------------------------------------------------------------------------------------------------------------------------------------------------------------------------------------------------------------------------------------------------------------------------------------------------------------------------------------------------------------------------------------------------------------------------------------------------------------------------------------------------------------------------------------------------------------------------------------------------------------------------------------------------------------------------------------------------------------------------------------------------------------------------------------------------------------------------------------------------------------------------------------------------------------------------------------------------------------------------------------------------------------------------------------------------------------------------------------------------------------------------------------------------------------------------------------------------------------------------------------------------------------------------------------------------------------------------------------------------------------------------------------------------------------------------------------------------------------------------------------------------------------------------------------------------------------------------------------------------------------------------------------------------------------------------------------------------------------------------------------------------------------------------------------------------------------------------------------------------------------------------------------------------------------------------------------------------------------------------------------------------------------------------------------------------------------------------------------------------------------------------------------------------------------------------------------------------------------------------------------------------------------------------------------------------------------------------------------------------------------------------------------------------------------------------------------------------------------------------------------------------------------------------------------------------------------------------------------------------------------------------------------------------------------------------------------------------------------------------------------------------------------------------------------------------------------------------------------------------------------------------------------------------------------------------------------------------------------------------------------------------------------------------------------------------------------------------------------------------------------------------------------------------------------------------------------------------------------------------------------------------------------------------------------------------------------------------------------------------------------------------------------------------------------------------------------------------------------------------------------------------------------------------------------------------------------------------------------------------------------------------------------------------------------------------------------------------------------------------------------------------------------------------------------------------------------------------------------------------------------------------------------------------------------------------------------------------------------------------------------------------------------------------------------------------------------------------------------------------------------------------------------------------------------------------------------------------------------------------------------------------------------------------------------------------------------------------------------------------------------------------------------------------------------------------------------------------------------------------------------------------------------------------------------------------------------------------------------------------------------------------------------------------------------------------------------------------------------------------------------------------------------------------------------------------------------------------------------------------------------------------------------------------------------------------------------------------------------------------------------------------------------|



|                             |          |    |                                                                                                                                                                                                                                                                                                                                                                                                                                  |                                                                |                                                                                                                                                                                                                                                                                                                                                                                                                                                                                                                                                                                                                                                                                                                                                                                                                                                                                                                                                                                                                                                                                                                                                                                                                                                                                                                                                                                                                                                                                                                                                                                                                                                                                                                                                                                                                                                                                                                                                                                                                                                                                                                                                                                                                                                                                                                                                                                                                                                                                                                                                                                                                                                                                                                                                          |
|-----------------------------|----------|----|----------------------------------------------------------------------------------------------------------------------------------------------------------------------------------------------------------------------------------------------------------------------------------------------------------------------------------------------------------------------------------------------------------------------------------|----------------------------------------------------------------|----------------------------------------------------------------------------------------------------------------------------------------------------------------------------------------------------------------------------------------------------------------------------------------------------------------------------------------------------------------------------------------------------------------------------------------------------------------------------------------------------------------------------------------------------------------------------------------------------------------------------------------------------------------------------------------------------------------------------------------------------------------------------------------------------------------------------------------------------------------------------------------------------------------------------------------------------------------------------------------------------------------------------------------------------------------------------------------------------------------------------------------------------------------------------------------------------------------------------------------------------------------------------------------------------------------------------------------------------------------------------------------------------------------------------------------------------------------------------------------------------------------------------------------------------------------------------------------------------------------------------------------------------------------------------------------------------------------------------------------------------------------------------------------------------------------------------------------------------------------------------------------------------------------------------------------------------------------------------------------------------------------------------------------------------------------------------------------------------------------------------------------------------------------------------------------------------------------------------------------------------------------------------------------------------------------------------------------------------------------------------------------------------------------------------------------------------------------------------------------------------------------------------------------------------------------------------------------------------------------------------------------------------------------------------------------------------------------------------------------------------------|
| Aminoacyl-tRNA biosynthesis | map00970 | 19 | <p>ec:6.1.1.6 - ligase, ec:6.1.1.7 - ligase, ec:6.1.1.9 - ligase, ec:6.1.1.2 - ligase, ec:6.1.1.3 - ligase, ec:6.1.1.4 - ligase, ec:6.1.1.5 - ligase, ec:6.1.1.18 - ligase, ec:6.1.1.17 - ligase, ec:6.1.1.19 - ligase, ec:6.1.1.14 - ligase, ec:6.1.1.16 - ligase, ec:6.1.1.15 - ligase, ec:6.1.1.10 - ligase, ec:6.1.1.12 - ligase, ec:6.1.1.11 - ligase, ec:6.1.1.21 - ligase, ec:6.1.1.20 - ligase, ec:6.1.1.22 - ligase</p> | <p>4, 2, 1, 4, 3, 1, 2, 1, 5, 1, 3, 4, 3, 1, 3, 6, 2, 4, 2</p> | <p>vo_c2_Locus_16703_Transcript_2/2_Confidence_0.000_Length_2117, tri_n_comp27405_c0_seq1, vo_c1_Locus_5594_Transcript_1/2_Confidence_0.500_Length_3744, vo_c2_Locus_17209_Transcript_1/2_Confidence_0.750_Length_2003, vo_c1_Locus_5547_Transcript_4/5_Confidence_0.300_Length_3117, vo_n2_Locus_16525_Transcript_2/3_Confidence_0.500_Length_3475, vo_c3_Locus_3849_Transcript_3/4_Confidence_0.250_Length_3311, tri_n_comp86678_c0_seq1, vo_n2_Locus_13581_Transcript_1/1_Confidence_0.000_Length_1796, tri_c_comp39733_c0_seq1, vo_n1_Locus_3026_Transcript_2/3_Confidence_0.400_Length_2292, vo_c3_Locus_928_Transcript_4/4_Confidence_0.000_Length_2840, vo_c3_Locus_928_Transcript_3/4_Confidence_0.667_Length_2754, tri_n_comp27258_c0_seq1, tri_c_comp46022_c0_seq1, vo_n2_Locus_4121_Transcript_4/4_Confidence_0.167_Length_4300, vo_c2_Locus_17767_Transcript_1/1_Confidence_0.000_Length_3269, vo_c1_Locus_2898_Transcript_1/1_Confidence_0.000_Length_2284, tri_n_comp17763_c0_seq2, tri_n_comp33248_c0_seq1, vo_n1_Locus_24951_Transcript_1/2_Confidence_0.750_Length_1980, vo_n1_Locus_24951_Transcript_2/2_Confidence_0.000_Length_2025, vo_n3_Locus_8238_Transcript_3/4_Confidence_0.750_Length_2102, vo_c3_Locus_22675_Transcript_1/4_Confidence_0.625_Length_2149, vo_c3_Locus_8275_Transcript_2/3_Confidence_0.750_Length_2028, vo_c3_Locus_19664_Transcript_2/6_Confidence_0.583_Length_2143, tri_c_comp34188_c0_seq1, vo_c2_Locus_32225_Transcript_1/1_Confidence_0.000_Length_2315, tri_n_comp7418_c0_seq1, vo_n2_Locus_11287_Transcript_1/1_Confidence_0.000_Length_2751, vo_n2_Locus_12683_Transcript_2/2_Confidence_0.000_Length_965, vo_n3_Locus_8238_Transcript_3/4_Confidence_0.750_Length_2102, tri_n_comp17763_c0_seq2, tri_n_comp33248_c0_seq1, vo_c1_Locus_27004_Transcript_1/1_Confidence_0.000_Length_2081, tri_c_comp31460_c0_seq1, tri_n_comp11954_c0_seq2, vo_n2_Locus_4794_Transcript_3/3_Confidence_0.000_Length_966, vo_c2_Locus_6681_Transcript_4/4_Confidence_0.200_Length_4226, vo_c2_Locus_29740_Transcript_1/1_Confidence_0.000_Length_1633, tri_n_comp34210_c0_seq1, tri_n_comp27198_c0_seq1, vo_n2_Locus_20560_Transcript_1/1_Confidence_0.000_Length_1758, tri_n_comp7628_c0_seq1, vo_c3_Locus_8136_Transcript_1/1_Confidence_0.333_Length_1822, vo_n2_Locus_18588_Transcript_1/2_Confidence_0.429_Length_1692, vo_n2_Locus_276_Transcript_1/2_Confidence_1.000_Length_1715, vo_c2_Locus_2909_Transcript_2/3_Confidence_0.333_Length_2506, vo_c3_Locus_7748_Transcript_2/2_Confidence_0.333_Length_2296, vo_n2_Locus_14099_Transcript_1/1_Confidence_0.000_Length_2060, vo_c3_Locus_23099_Transcript_1/1_Confidence_0.000_Length_1800, vo_c2_Locus_7737_Transcript_1/1_Confidence_0.000_Length_1822</p> |
|-----------------------------|----------|----|----------------------------------------------------------------------------------------------------------------------------------------------------------------------------------------------------------------------------------------------------------------------------------------------------------------------------------------------------------------------------------------------------------------------------------|----------------------------------------------------------------|----------------------------------------------------------------------------------------------------------------------------------------------------------------------------------------------------------------------------------------------------------------------------------------------------------------------------------------------------------------------------------------------------------------------------------------------------------------------------------------------------------------------------------------------------------------------------------------------------------------------------------------------------------------------------------------------------------------------------------------------------------------------------------------------------------------------------------------------------------------------------------------------------------------------------------------------------------------------------------------------------------------------------------------------------------------------------------------------------------------------------------------------------------------------------------------------------------------------------------------------------------------------------------------------------------------------------------------------------------------------------------------------------------------------------------------------------------------------------------------------------------------------------------------------------------------------------------------------------------------------------------------------------------------------------------------------------------------------------------------------------------------------------------------------------------------------------------------------------------------------------------------------------------------------------------------------------------------------------------------------------------------------------------------------------------------------------------------------------------------------------------------------------------------------------------------------------------------------------------------------------------------------------------------------------------------------------------------------------------------------------------------------------------------------------------------------------------------------------------------------------------------------------------------------------------------------------------------------------------------------------------------------------------------------------------------------------------------------------------------------------------|

|                                         |          |    |                                                                                                                                                                                                                                                                                                                                                                                                                                                                                                                                                                   |                                                                         |                                                                                                                                                                                                                                                                                                                                                                                                                                                                                                                                                                                                                                                                                                                                                                                                                                                                                                                                                                                                                                                                                                                                                                                                                                                                                                                                                                                                                                                                                                                                                                                                                                                                                                                                                                                                                                                                                                                                                                                                                                                                                                                                                                                                                                                                                                                                                                                                                                                                                                                                                                                                                                                                                                                                                                                                                                                                                                                                                                                                                                                                                                                                                                                                                                                                                                                                                                                                                                                                                                                                                                                                                                                                                                                                                                                                                                                                                                                                                                                                                                                                                                                                                                                                                                                                                                                                                                                                                                                                                                                                                                                                                                                                                                                                                                                                                                                                                                                                                                                                                                                                                                                                                                                                                                                                                                                                                                                                                                                                                                                                                                                                                                                                                                                                                                                                                                                                                                                                                                                                                                                                                                                                                                                                                                                                                                                                                                                                                                                                                                                                                                                                                                                                                                                                                                                                                                                                                                                                                                     |
|-----------------------------------------|----------|----|-------------------------------------------------------------------------------------------------------------------------------------------------------------------------------------------------------------------------------------------------------------------------------------------------------------------------------------------------------------------------------------------------------------------------------------------------------------------------------------------------------------------------------------------------------------------|-------------------------------------------------------------------------|---------------------------------------------------------------------------------------------------------------------------------------------------------------------------------------------------------------------------------------------------------------------------------------------------------------------------------------------------------------------------------------------------------------------------------------------------------------------------------------------------------------------------------------------------------------------------------------------------------------------------------------------------------------------------------------------------------------------------------------------------------------------------------------------------------------------------------------------------------------------------------------------------------------------------------------------------------------------------------------------------------------------------------------------------------------------------------------------------------------------------------------------------------------------------------------------------------------------------------------------------------------------------------------------------------------------------------------------------------------------------------------------------------------------------------------------------------------------------------------------------------------------------------------------------------------------------------------------------------------------------------------------------------------------------------------------------------------------------------------------------------------------------------------------------------------------------------------------------------------------------------------------------------------------------------------------------------------------------------------------------------------------------------------------------------------------------------------------------------------------------------------------------------------------------------------------------------------------------------------------------------------------------------------------------------------------------------------------------------------------------------------------------------------------------------------------------------------------------------------------------------------------------------------------------------------------------------------------------------------------------------------------------------------------------------------------------------------------------------------------------------------------------------------------------------------------------------------------------------------------------------------------------------------------------------------------------------------------------------------------------------------------------------------------------------------------------------------------------------------------------------------------------------------------------------------------------------------------------------------------------------------------------------------------------------------------------------------------------------------------------------------------------------------------------------------------------------------------------------------------------------------------------------------------------------------------------------------------------------------------------------------------------------------------------------------------------------------------------------------------------------------------------------------------------------------------------------------------------------------------------------------------------------------------------------------------------------------------------------------------------------------------------------------------------------------------------------------------------------------------------------------------------------------------------------------------------------------------------------------------------------------------------------------------------------------------------------------------------------------------------------------------------------------------------------------------------------------------------------------------------------------------------------------------------------------------------------------------------------------------------------------------------------------------------------------------------------------------------------------------------------------------------------------------------------------------------------------------------------------------------------------------------------------------------------------------------------------------------------------------------------------------------------------------------------------------------------------------------------------------------------------------------------------------------------------------------------------------------------------------------------------------------------------------------------------------------------------------------------------------------------------------------------------------------------------------------------------------------------------------------------------------------------------------------------------------------------------------------------------------------------------------------------------------------------------------------------------------------------------------------------------------------------------------------------------------------------------------------------------------------------------------------------------------------------------------------------------------------------------------------------------------------------------------------------------------------------------------------------------------------------------------------------------------------------------------------------------------------------------------------------------------------------------------------------------------------------------------------------------------------------------------------------------------------------------------------------------------------------------------------------------------------------------------------------------------------------------------------------------------------------------------------------------------------------------------------------------------------------------------------------------------------------------------------------------------------------------------------------------------------------------------------------------------------------------------------------------------|
| Carbon fixation pathways in prokaryotes | map00720 | 19 | <p>ec:6.4.1.1 - carboxylase, ec:6.4.1.2 - carboxylase, ec:1.3.5.1 - dehydrogenase, ec:4.1.3.24 - lyase, ec:3.5.4.9 - cyclohydrolase, ec:6.2.1.5 - ligase (ADP-forming), ec:6.2.1.1 - ligase, ec:2.3.1.9 - C-acetyltransferase, ec:1.5.1.5 - dehydrogenase (NADP+), ec:2.3.3.8 - citrate synthase, ec:6.3.4.3 - ligase, ec:1.5.1.20 - reductase [NAD(P)H], ec:4.2.1.3 - hydratase, ec:4.2.1.2 - hydratase, ec:4.2.1.17 - hydratase, ec:2.7.9.2 - water dikinase, ec:1.1.1.37 - dehydrogenase, ec:1.1.1.35 - dehydrogenase, ec:1.1.1.42 - dehydrogenase (NADP+)</p> | <p>1, 16, 11, 15, 2, 28, 1, 2, 2, 31, 2, 1, 8, 2, 7, 15, 24, 16, 10</p> | <p>vo_n2_Locus_15097_Transcript_1/1_Confidence_0.000_Length_3935, vo_n3_Locus_484_Transcript_6/12_Confidence_0.250_Length_1533, vo_c3_Locus_17332_Transcript_1/1_Confidence_0.333_Length_6493, vo_n3_Locus_696_Transcript_20/35_Confidence_0.473_Length_5396, vo_c3_Locus_2164_Transcript_38/39_Confidence_0.292_Length_6879, tri_n_comp41552_c0_seq1, vo_c2_Locus_1509_Transcript_1/47_Confidence_0.149_Length_2731, vo_c2_Locus_2193_Transcript_1/3_Confidence_0.667_Length_1218, vo_c1_Locus_860_Transcript_10/29_Confidence_0.571_Length_6744, vo_c2_Locus_1509_Transcript_11/47_Confidence_0.164_Length_2686, vo_n2_Locus_1751_Transcript_51/59_Confidence_0.207_Length_3566, vo_n2_Locus_15097_Transcript_1/1_Confidence_0.000_Length_3935, vo_n3_Locus_484_Transcript_5/12_Confidence_0.250_Length_1451, vo_c1_Locus_860_Transcript_11/29_Confidence_0.571_Length_6741, tri_c_comp19913_c0_seq3, vo_n2_Locus_1751_Transcript_37/59_Confidence_0.195_Length_3437, vo_c2_Locus_1509_Transcript_6/47_Confidence_0.149_Length_2592, vo_n2_Locus_5500_Transcript_5/5_Confidence_0.308_Length_1268, vo_n2_Locus_5500_Transcript_1/5_Confidence_0.308_Length_1100, tri_n_comp12494_c0_seq1, vo_n2_Locus_5500_Transcript_2/5_Confidence_0.538_Length_1312, vo_n2_Locus_2182_Transcript_14/15_Confidence_0.458_Length_3129, vo_c2_Locus_642_Transcript_3/10_Confidence_0.571_Length_2141, vo_n1_Locus_1508_Transcript_4/6_Confidence_0.429_Length_1979, vo_n1_Locus_2259_Transcript_6/13_Confidence_0.429_Length_1275, vo_n1_Locus_2259_Transcript_9/13_Confidence_0.429_Length_1314, vo_c1_Locus_1462_Transcript_1/46_Confidence_0.182_Length_2129, vo_c1_Locus_1462_Transcript_8/46_Confidence_0.530_Length_9104, vo_c1_Locus_9668_Transcript_5/11_Confidence_0.391_Length_1245, vo_c2_Locus_3988_Transcript_2/10_Confidence_0.500_Length_1233, vo_n3_Locus_4554_Transcript_5/8_Confidence_0.600_Length_1377, vo_c2_Locus_3988_Transcript_1/10_Confidence_0.607_Length_1361, vo_n1_Locus_2626_Transcript_19/26_Confidence_0.238_Length_3851, vo_c1_Locus_9668_Transcript_4/11_Confidence_0.435_Length_1360, vo_n1_Locus_2626_Transcript_15/26_Confidence_0.262_Length_1311, vo_c1_Locus_9668_Transcript_6/11_Confidence_0.348_Length_1630, vo_n2_Locus_3_Transcript_5064/24291_Confidence_0.000_Length_1233, vo_n3_Locus_4554_Transcript_6/8_Confidence_0.533_Length_1337, vo_c2_Locus_3988_Transcript_5/10_Confidence_0.536_Length_2785, vo_n1_Locus_2626_Transcript_18/26_Confidence_0.310_Length_2079, vo_c2_Locus_3988_Transcript_7/10_Confidence_0.500_Length_1273, vo_n2_Locus_3_Transcript_5069/24291_Confidence_0.000_Length_1240, vo_c2_Locus_3988_Transcript_9/10_Confidence_0.429_Length_1401, tri_n_comp31819_c0_seq1, vo_n2_Locus_10494_Transcript_3/4_Confidence_0.333_Length_2314, vo_c1_Locus_2207_Transcript_20/51_Confidence_0.393_Length_3556, vo_c3_Locus_2283_Transcript_28/38_Confidence_0.331_Length_3501, vo_n3_Locus_1164_Transcript_30/46_Confidence_0.400_Length_3745, tri_c_comp20184_c0_seq2, vo_c2_Locus_7270_Transcript_1/1_Confidence_0.500_Length_1488, vo_c1_Locus_31_Transcript_859/1155_Confidence_0.002_Length_1257, vo_n3_Locus_1164_Transcript_32/46_Confidence_0.456_Length_3745, vo_n1_Locus_3448_Transcript_46/64_Confidence_0.085_Length_783, vo_c2_Locus_644_Transcript_12/40_Confidence_0.459_Length_3665, vo_n3_Locus_1164_Transcript_35/46_Confidence_0.511_Length_3745, vo_c3_Locus_5_Transcript_229/353_Confidence_0.004_Length_952, vo_c2_Locus_644_Transcript_3/40_Confidence_0.071_Length_957, vo_n1_Locus_3448_Transcript_53/64_Confidence_0.225_Length_3567, vo_n2_Locus_386_Transcript_32/33_Confidence_0.208_Length_3664, vo_n1_Locus_3448_Transcript_63/64_Confidence_0.318_Length_3637, vo_n3_Locus_1164_Transcript_33/46_Confidence_0.456_Length_3748, vo_c3_Locus_2283_Transcript_26/38_Confidence_0.285_Length_3501, vo_n2_Locus_386_Transcript_22/33_Confidence_0.376_Length_3568, vo_c3_Locus_2283_Transcript_29/38_Confidence_0.292_Length_3501, vo_n2_Locus_386_Transcript_1/33_Confidence_0.139_Length_3600, vo_c2_Locus_644_Transcript_24/40_Confidence_0.398_Length_3511, vo_n3_Locus_1164_Transcript_43/46_Confidence_0.389_Length_3338, vo_n1_Locus_2207_Transcript_39/51_Confidence_0.250_Length_3586, vo_c3_Locus_79_Transcript_1/3_Confidence_0.200_Length_5222, vo_c2_Locus_52_Transcript_234/466_Confidence_0.003_Length_1462, vo_n2_Locus_386_Transcript_10/33_Confidence_0.376_Length_3676, vo_n1_Locus_1394_Transcript_2/3_Confidence_0.400_Length_2232, tri_n_comp19507_c0_seq6, vo_n3_Locus_9269_Transcript_1/1_Confidence_0.000_Length_2238, vo_c1_Locus_2657_Transcript_1/1_Confidence_0.000_Length_1513, vo_n2_Locus_23058_Transcript_1/1_Confidence_0.000_Length_1342, vo_n2_Locus_2550_Transcript_2/3_Confidence_0.636_Length_1302, tri_n_comp31819_c0_seq1, vo_c1_Locus_2207_Transcript_20/51_Confidence_0.393_Length_3556, vo_c3_Locus_2283_Transcript_28/38_Confidence_0.331_Length_3501, vo_n3_Locus_1164_Transcript_30/46_Confidence_0.400_Length_3745, tri_c_comp20184_c0_seq2, vo_n3_Locus_1164_Transcript_32/46_Confidence_0.456_Length_3745, vo_n1_Locus_3448_Transcript_1/64_Confidence_0.062_Length_478, vo_n1_Locus_3448_Transcript_46/64_Confidence_0.085_Length_783, vo_c2_Locus_644_Transcript_12/40_Confidence_0.459_Length_3665, vo_n3_Locus_1164_Transcript_35/46_Confidence_0.511_Length_3745, vo_c2_Locus_644_Transcript_3/40_Confidence_0.071_Length_957, vo_n1_Locus_3448_Transcript_53/64_Confidence_0.225_Length_3567, vo_n2_Locus_386_Transcript_32/33_Confidence_0.208_Length_3664, vo_n1_Locus_3448_Transcript_63/64_Confidence_0.318_Length_3637, vo_n3_Locus_1164_Transcript_33/46_Confidence_0.456_Length_3748, vo_c3_Locus_2283_Transcript_26/38_Confidence_0.285_Length_3501, vo_n2_Locus_386_Transcript_22/33_Confidence_0.376_Length_3568, vo_n1_Locus_3448_Transcript_2/64_Confidence_0.054_Length_402, vo_c3_Locus_2283_Transcript_29/38_Confidence_0.292_Length_3501, vo_c3_Locus_2283_Transcript_35/38_Confidence_0.400_Length_3582, vo_n2_Locus_386_Transcript_1/33_Confidence_0.139_Length_3600, vo_c2_Locus_644_Transcript_24/40_Confidence_0.398_Length_3511, vo_n3_Locus_1164_Transcript_43/46_Confidence_0.389_Length_3338, vo_c1_Locus_2207_Transcript_39/51_Confidence_0.250_Length_3586, vo_c3_Locus_79_Transcript_1/3_Confidence_0.200_Length_5222, vo_n2_Locus_386_Transcript_10/33_Confidence_0.376_Length_3676, vo_n1_Locus_1394_Transcript_2/3_Confidence_0.400_Length_2232, vo_c2_Locus_644_Transcript_6/40_Confidence_0.204_Length_3616, vo_c1_Locus_2207_Transcript_36/51_Confidence_0.402_Length_3407, vo_n2_Locus_386_Transcript_5/33_Confidence_0.040_Length_566, tri_n_comp19507_c0_seq6, vo_n1_Locus_3448_Transcript_55/64_Confidence_0.233_Length_3564, tri_n_comp31819_c0_seq1, vo_n2_Locus_10494_Transcript_3/4_Confidence_0.333_Length_2314, vo_c2_Locus_1465_Transcript_1/1_Confidence_0.000_Length_2684,</p> |
|-----------------------------------------|----------|----|-------------------------------------------------------------------------------------------------------------------------------------------------------------------------------------------------------------------------------------------------------------------------------------------------------------------------------------------------------------------------------------------------------------------------------------------------------------------------------------------------------------------------------------------------------------------|-------------------------------------------------------------------------|---------------------------------------------------------------------------------------------------------------------------------------------------------------------------------------------------------------------------------------------------------------------------------------------------------------------------------------------------------------------------------------------------------------------------------------------------------------------------------------------------------------------------------------------------------------------------------------------------------------------------------------------------------------------------------------------------------------------------------------------------------------------------------------------------------------------------------------------------------------------------------------------------------------------------------------------------------------------------------------------------------------------------------------------------------------------------------------------------------------------------------------------------------------------------------------------------------------------------------------------------------------------------------------------------------------------------------------------------------------------------------------------------------------------------------------------------------------------------------------------------------------------------------------------------------------------------------------------------------------------------------------------------------------------------------------------------------------------------------------------------------------------------------------------------------------------------------------------------------------------------------------------------------------------------------------------------------------------------------------------------------------------------------------------------------------------------------------------------------------------------------------------------------------------------------------------------------------------------------------------------------------------------------------------------------------------------------------------------------------------------------------------------------------------------------------------------------------------------------------------------------------------------------------------------------------------------------------------------------------------------------------------------------------------------------------------------------------------------------------------------------------------------------------------------------------------------------------------------------------------------------------------------------------------------------------------------------------------------------------------------------------------------------------------------------------------------------------------------------------------------------------------------------------------------------------------------------------------------------------------------------------------------------------------------------------------------------------------------------------------------------------------------------------------------------------------------------------------------------------------------------------------------------------------------------------------------------------------------------------------------------------------------------------------------------------------------------------------------------------------------------------------------------------------------------------------------------------------------------------------------------------------------------------------------------------------------------------------------------------------------------------------------------------------------------------------------------------------------------------------------------------------------------------------------------------------------------------------------------------------------------------------------------------------------------------------------------------------------------------------------------------------------------------------------------------------------------------------------------------------------------------------------------------------------------------------------------------------------------------------------------------------------------------------------------------------------------------------------------------------------------------------------------------------------------------------------------------------------------------------------------------------------------------------------------------------------------------------------------------------------------------------------------------------------------------------------------------------------------------------------------------------------------------------------------------------------------------------------------------------------------------------------------------------------------------------------------------------------------------------------------------------------------------------------------------------------------------------------------------------------------------------------------------------------------------------------------------------------------------------------------------------------------------------------------------------------------------------------------------------------------------------------------------------------------------------------------------------------------------------------------------------------------------------------------------------------------------------------------------------------------------------------------------------------------------------------------------------------------------------------------------------------------------------------------------------------------------------------------------------------------------------------------------------------------------------------------------------------------------------------------------------------------------------------------------------------------------------------------------------------------------------------------------------------------------------------------------------------------------------------------------------------------------------------------------------------------------------------------------------------------------------------------------------------------------------------------------------------------------------------------------------------------------------------------------------------------------------|

|  |  |  |  |                                                                                                                                                                                                                                                                                                                                                                                                                                                                                                                                                                                                                                                                                                                                                                                                                                                                                                                                                                                                                                                                                                                                                                                                                                                                                                                                                                                                                                                                                                                                                                                                                                                                                                                                                                                                                                                                                                                                                                                                                                                                                                                                                                                                                                                                                                                                                                                                                                                                                                                                                                                                                                                                                                                                                                                                                                                                                                                                                                                                                                                                                                                                                                                                                                                                                                                                                                                                                                                                                                                                                                                                                                                                                                                                                                                                                                                                                                                                                                                                                                                                                                                                                                                                                                                                                                                                                                                                                                                                                                                                                                                                                                                                                                                                                                                                                                                                                                                                                                                                                                                                                                                                                                                                                                                   |
|--|--|--|--|---------------------------------------------------------------------------------------------------------------------------------------------------------------------------------------------------------------------------------------------------------------------------------------------------------------------------------------------------------------------------------------------------------------------------------------------------------------------------------------------------------------------------------------------------------------------------------------------------------------------------------------------------------------------------------------------------------------------------------------------------------------------------------------------------------------------------------------------------------------------------------------------------------------------------------------------------------------------------------------------------------------------------------------------------------------------------------------------------------------------------------------------------------------------------------------------------------------------------------------------------------------------------------------------------------------------------------------------------------------------------------------------------------------------------------------------------------------------------------------------------------------------------------------------------------------------------------------------------------------------------------------------------------------------------------------------------------------------------------------------------------------------------------------------------------------------------------------------------------------------------------------------------------------------------------------------------------------------------------------------------------------------------------------------------------------------------------------------------------------------------------------------------------------------------------------------------------------------------------------------------------------------------------------------------------------------------------------------------------------------------------------------------------------------------------------------------------------------------------------------------------------------------------------------------------------------------------------------------------------------------------------------------------------------------------------------------------------------------------------------------------------------------------------------------------------------------------------------------------------------------------------------------------------------------------------------------------------------------------------------------------------------------------------------------------------------------------------------------------------------------------------------------------------------------------------------------------------------------------------------------------------------------------------------------------------------------------------------------------------------------------------------------------------------------------------------------------------------------------------------------------------------------------------------------------------------------------------------------------------------------------------------------------------------------------------------------------------------------------------------------------------------------------------------------------------------------------------------------------------------------------------------------------------------------------------------------------------------------------------------------------------------------------------------------------------------------------------------------------------------------------------------------------------------------------------------------------------------------------------------------------------------------------------------------------------------------------------------------------------------------------------------------------------------------------------------------------------------------------------------------------------------------------------------------------------------------------------------------------------------------------------------------------------------------------------------------------------------------------------------------------------------------------------------------------------------------------------------------------------------------------------------------------------------------------------------------------------------------------------------------------------------------------------------------------------------------------------------------------------------------------------------------------------------------------------------------------------------------------------------------|
|  |  |  |  | <p>tri_n_comp15079_c0_seq3, vo_c1_Locus_2380_Transcript_17/17_Confidence_0.086_Length_3951,<br/>vo_c2_Locus_191_Transcript_2/2_Confidence_0.167_Length_3106, vo_c1_Locus_2380_Transcript_3/17_Confidence_0.371_Length_12857,<br/>tri_c_comp21028_c0_seq2, tri_c_comp21028_c0_seq3, vo_c2_Locus_354_Transcript_3/17_Confidence_0.667_Length_4966,<br/>vo_n1_Locus_30469_Transcript_2/2_Confidence_0.000_Length_979, tri_n_comp8247_c0_seq2,<br/>vo_c3_Locus_1133_Transcript_4/9_Confidence_0.455_Length_1666, vo_c2_Locus_2261_Transcript_1/2_Confidence_1.000_Length_2564,<br/>vo_n3_Locus_5948_Transcript_1/1_Confidence_0.000_Length_1027, vo_n2_Locus_16945_Transcript_1/3_Confidence_0.500_Length_1084,<br/>vo_c3_Locus_9925_Transcript_8/11_Confidence_0.263_Length_3550, vo_n1_Locus_11137_Transcript_5/5_Confidence_0.143_Length_2829,<br/>vo_n2_Locus_16945_Transcript_3/3_Confidence_0.000_Length_746, vo_n2_Locus_30747_Transcript_1/1_Confidence_0.000_Length_951,<br/>vo_c1_Locus_1662_Transcript_19/44_Confidence_0.278_Length_3148, vo_n2_Locus_1146_Transcript_9/32_Confidence_0.492_Length_2897,<br/>vo_n3_Locus_3213_Transcript_1/29_Confidence_0.022_Length_515, vo_n1_Locus_1032_Transcript_1/39_Confidence_0.018_Length_458,<br/>tri_n_comp20108_c0_seq2, vo_c1_Locus_1662_Transcript_28/44_Confidence_0.200_Length_3087,<br/>vo_c2_Locus_49_Transcript_21/157_Confidence_0.007_Length_465, vo_c2_Locus_49_Transcript_31/157_Confidence_0.027_Length_1554,<br/>vo_c3_Locus_49_Transcript_20/157_Confidence_0.037_Length_3535, vo_c1_Locus_1662_Transcript_6/44_Confidence_0.211_Length_3160,<br/>vo_c2_Locus_49_Transcript_28/157_Confidence_0.071_Length_2983, vo_n1_Locus_1032_Transcript_5/39_Confidence_0.404_Length_3016,<br/>vo_n1_Locus_1032_Transcript_38/39_Confidence_0.228_Length_2924, vo_n1_Locus_1032_Transcript_8/39_Confidence_0.386_Length_2954,<br/>vo_c3_Locus_1031_Transcript_12/33_Confidence_0.385_Length_3145, vo_c3_Locus_1723_Transcript_29/37_Confidence_0.411_Length_1695,<br/>vo_n2_Locus_330_Transcript_25/38_Confidence_0.361_Length_1516, vo_n3_Locus_1723_Transcript_35/37_Confidence_0.464_Length_1702,<br/>vo_c1_Locus_15206_Transcript_3/3_Confidence_0.000_Length_1312, vo_c1_Locus_7371_Transcript_4/4_Confidence_0.600_Length_1352,<br/>vo_c3_Locus_1723_Transcript_37/37_Confidence_0.214_Length_1530, vo_n1_Locus_769_Transcript_28/41_Confidence_0.400_Length_1609,<br/>vo_n1_Locus_769_Transcript_9/41_Confidence_0.460_Length_1494, vo_c3_Locus_2965_Transcript_2/2_Confidence_0.250_Length_1327,<br/>vo_n2_Locus_330_Transcript_5/38_Confidence_0.328_Length_11715, vo_n1_Locus_9772_Transcript_1/2_Confidence_0.333_Length_1224,<br/>vo_c1_Locus_3603_Transcript_44/48_Confidence_0.492_Length_1696, vo_c2_Locus_4242_Transcript_2/3_Confidence_0.400_Length_1168,<br/>vo_n1_Locus_6649_Transcript_2/3_Confidence_0.500_Length_2124, vo_c1_Locus_7371_Transcript_1/4_Confidence_0.500_Length_1352,<br/>vo_n3_Locus_2381_Transcript_2/3_Confidence_0.500_Length_1330, vo_c3_Locus_1723_Transcript_16/37_Confidence_0.286_Length_1491,<br/>vo_n1_Locus_769_Transcript_36/41_Confidence_0.420_Length_1536, vo_n1_Locus_769_Transcript_40/41_Confidence_0.320_Length_1479,<br/>vo_n1_Locus_6649_Transcript_1/3_Confidence_0.750_Length_1883, vo_c1_Locus_3603_Transcript_26/48_Confidence_0.400_Length_1432,<br/>vo_n1_Locus_5348_Transcript_2/2_Confidence_0.200_Length_1608, vo_n3_Locus_3383_Transcript_35/37_Confidence_0.389_Length_1512,<br/>tri_c_comp20802_c0_seq1, vo_c2_Locus_2261_Transcript_1/2_Confidence_1.000_Length_2564,<br/>vo_n1_Locus_9414_Transcript_8/13_Confidence_0.167_Length_606, vo_c1_Locus_40339_Transcript_1/1_Confidence_0.000_Length_1318,<br/>vo_c3_Locus_2031_Transcript_8/8_Confidence_0.111_Length_1389, vo_n1_Locus_11137_Transcript_5/5_Confidence_0.143_Length_2829,<br/>vo_c1_Locus_4675_Transcript_3/3_Confidence_0.200_Length_1348, vo_n2_Locus_30747_Transcript_1/1_Confidence_0.000_Length_951,<br/>vo_n2_Locus_636_Transcript_13/16_Confidence_0.222_Length_768, vo_c1_Locus_2815_Transcript_3/4_Confidence_0.200_Length_2244,<br/>vo_c3_Locus_9925_Transcript_8/11_Confidence_0.263_Length_3550, tri_n_comp42565_c0_seq1,<br/>vo_c2_Locus_189_Transcript_29/60_Confidence_0.015_Length_692, vo_n2_Locus_636_Transcript_16/16_Confidence_0.139_Length_616,<br/>vo_n2_Locus_636_Transcript_14/16_Confidence_0.222_Length_622, vo_n2_Locus_636_Transcript_5/16_Confidence_0.194_Length_591,<br/>vo_n2_Locus_636_Transcript_3/16_Confidence_0.306_Length_685, vo_c3_Locus_6304_Transcript_1/17_Confidence_0.159_Length_2915,<br/>vo_n2_Locus_353_Transcript_7/18_Confidence_0.420_Length_2960, vo_c1_Locus_5705_Transcript_18/19_Confidence_0.191_Length_3822,<br/>vo_n2_Locus_353_Transcript_14/18_Confidence_0.280_Length_2879, vo_n1_Locus_2903_Transcript_2/3_Confidence_0.400_Length_1386,<br/>vo_n1_Locus_464_Transcript_11/22_Confidence_0.362_Length_3670, vo_c2_Locus_11026_Transcript_2/2_Confidence_0.000_Length_1965,<br/>vo_c3_Locus_6304_Transcript_5/17_Confidence_0.477_Length_2995, vo_c1_Locus_5705_Transcript_16/19_Confidence_0.489_Length_4193,<br/>vo_c3_Locus_6304_Transcript_2/17_Confidence_0.523_Length_3712</p> |
|--|--|--|--|---------------------------------------------------------------------------------------------------------------------------------------------------------------------------------------------------------------------------------------------------------------------------------------------------------------------------------------------------------------------------------------------------------------------------------------------------------------------------------------------------------------------------------------------------------------------------------------------------------------------------------------------------------------------------------------------------------------------------------------------------------------------------------------------------------------------------------------------------------------------------------------------------------------------------------------------------------------------------------------------------------------------------------------------------------------------------------------------------------------------------------------------------------------------------------------------------------------------------------------------------------------------------------------------------------------------------------------------------------------------------------------------------------------------------------------------------------------------------------------------------------------------------------------------------------------------------------------------------------------------------------------------------------------------------------------------------------------------------------------------------------------------------------------------------------------------------------------------------------------------------------------------------------------------------------------------------------------------------------------------------------------------------------------------------------------------------------------------------------------------------------------------------------------------------------------------------------------------------------------------------------------------------------------------------------------------------------------------------------------------------------------------------------------------------------------------------------------------------------------------------------------------------------------------------------------------------------------------------------------------------------------------------------------------------------------------------------------------------------------------------------------------------------------------------------------------------------------------------------------------------------------------------------------------------------------------------------------------------------------------------------------------------------------------------------------------------------------------------------------------------------------------------------------------------------------------------------------------------------------------------------------------------------------------------------------------------------------------------------------------------------------------------------------------------------------------------------------------------------------------------------------------------------------------------------------------------------------------------------------------------------------------------------------------------------------------------------------------------------------------------------------------------------------------------------------------------------------------------------------------------------------------------------------------------------------------------------------------------------------------------------------------------------------------------------------------------------------------------------------------------------------------------------------------------------------------------------------------------------------------------------------------------------------------------------------------------------------------------------------------------------------------------------------------------------------------------------------------------------------------------------------------------------------------------------------------------------------------------------------------------------------------------------------------------------------------------------------------------------------------------------------------------------------------------------------------------------------------------------------------------------------------------------------------------------------------------------------------------------------------------------------------------------------------------------------------------------------------------------------------------------------------------------------------------------------------------------------------------------------------------|

|                                             |          |    |                                                                                                                                                                                                                                                                                                                                                                                                                                                                                                                                                                                                                                                       |                                                                       |                                                                                                                                                                                                                                                                                                                                                                                                                                                                                                                                                                                                                                                                                                                                                                                                                                                                                                                                                                                                                                                                                                                                                                                                                                                                                                                                                                                                                                                                                                                                                                                                                                                                                                                                                                                                                                                                                                                                                                                                                                                                                                                                                                                                                                                                                                                                                                                                                                                                                                                                                                                                                                                                                                                                                                                                                                                                                                                                                                                                                                                                                                                                                                                                                                                                                                                                                                                                                                                                                                                                                                                                                                                                                                                                                                                                                                                                                                                                                                                                                                                                                                                                                                                                                                                                                                                                                                                                                                                                                                                                                                                                                                                                                                                                                                                                                                                                                                                                                                                                                                                                                                                                                                                                                                                                                                                                                                                                                                                                                                                                                                                                                                                                                                                                                                                                                                                                                                                                                                                                                                                                                                                                                                                                                                                                                                                                                                                                                                                                                                                                                                                                                                                                                                                                                                                                                                                                                                                                                                                                                                                                                                                                                                                                                                                                                     |
|---------------------------------------------|----------|----|-------------------------------------------------------------------------------------------------------------------------------------------------------------------------------------------------------------------------------------------------------------------------------------------------------------------------------------------------------------------------------------------------------------------------------------------------------------------------------------------------------------------------------------------------------------------------------------------------------------------------------------------------------|-----------------------------------------------------------------------|-------------------------------------------------------------------------------------------------------------------------------------------------------------------------------------------------------------------------------------------------------------------------------------------------------------------------------------------------------------------------------------------------------------------------------------------------------------------------------------------------------------------------------------------------------------------------------------------------------------------------------------------------------------------------------------------------------------------------------------------------------------------------------------------------------------------------------------------------------------------------------------------------------------------------------------------------------------------------------------------------------------------------------------------------------------------------------------------------------------------------------------------------------------------------------------------------------------------------------------------------------------------------------------------------------------------------------------------------------------------------------------------------------------------------------------------------------------------------------------------------------------------------------------------------------------------------------------------------------------------------------------------------------------------------------------------------------------------------------------------------------------------------------------------------------------------------------------------------------------------------------------------------------------------------------------------------------------------------------------------------------------------------------------------------------------------------------------------------------------------------------------------------------------------------------------------------------------------------------------------------------------------------------------------------------------------------------------------------------------------------------------------------------------------------------------------------------------------------------------------------------------------------------------------------------------------------------------------------------------------------------------------------------------------------------------------------------------------------------------------------------------------------------------------------------------------------------------------------------------------------------------------------------------------------------------------------------------------------------------------------------------------------------------------------------------------------------------------------------------------------------------------------------------------------------------------------------------------------------------------------------------------------------------------------------------------------------------------------------------------------------------------------------------------------------------------------------------------------------------------------------------------------------------------------------------------------------------------------------------------------------------------------------------------------------------------------------------------------------------------------------------------------------------------------------------------------------------------------------------------------------------------------------------------------------------------------------------------------------------------------------------------------------------------------------------------------------------------------------------------------------------------------------------------------------------------------------------------------------------------------------------------------------------------------------------------------------------------------------------------------------------------------------------------------------------------------------------------------------------------------------------------------------------------------------------------------------------------------------------------------------------------------------------------------------------------------------------------------------------------------------------------------------------------------------------------------------------------------------------------------------------------------------------------------------------------------------------------------------------------------------------------------------------------------------------------------------------------------------------------------------------------------------------------------------------------------------------------------------------------------------------------------------------------------------------------------------------------------------------------------------------------------------------------------------------------------------------------------------------------------------------------------------------------------------------------------------------------------------------------------------------------------------------------------------------------------------------------------------------------------------------------------------------------------------------------------------------------------------------------------------------------------------------------------------------------------------------------------------------------------------------------------------------------------------------------------------------------------------------------------------------------------------------------------------------------------------------------------------------------------------------------------------------------------------------------------------------------------------------------------------------------------------------------------------------------------------------------------------------------------------------------------------------------------------------------------------------------------------------------------------------------------------------------------------------------------------------------------------------------------------------------------------------------------------------------------------------------------------------------------------------------------------------------------------------------------------------------------------------------------------------------------------------------------------------------------------------------------------------------------------------------------------------------------------------------------------------------------------------------------------------------------------------|
| Carbon fixation in photosynthetic organisms | map00710 | 18 | <p>ec:4.1.1.49 - carboxykinase (ATP), ec:4.1.1.39 - carboxylase, ec:2.2.1.1 - glycolaldehydetransferase, ec:2.7.2.3 - kinase, ec:1.2.1.59 - dehydrogenase (NAD(P)+) (phosphorylating), ec:2.7.1.19 - phosphopentokinase, ec:1.2.1.12 - dehydrogenase (phosphorylating), ec:5.3.1.1 - isomerase, ec:5.3.1.6 - isomerase, ec:2.6.1.1 - transaminase, ec:4.1.2.13 - aldolase, ec:3.1.3.37 - SBPase, ec:5.1.3.1 - 3-pimerase, ec:3.1.3.11 - hexose diphosphatase, ec:1.1.1.82 - dehydrogenase (NADP+), ec:1.1.1.37 - dehydrogenase, ec:1.1.1.39 - dehydrogenase (decarboxylating), ec:1.1.1.40 - dehydrogenase (oxaloacetate-decarboxylating) (NADP+)</p> | <p>5, 95, 24, 41, 16, 25, 45, 9, 2, 4, 38, 3, 3, 8, 23, 24, 11, 7</p> | <p>vo_c1_Locus_2295_Transcript_9/10_Confidence_0.238_Length_2213, vo_c2_Locus_2862_Transcript_9/10_Confidence_0.250_Length_2209, vo_c1_Locus_2295_Transcript_3/10_Confidence_0.524_Length_2330, vo_n2_Locus_1690_Transcript_8/11_Confidence_0.429_Length_2234, vo_n2_Locus_1690_Transcript_9/11_Confidence_0.429_Length_2277, vo_c1_Locus_1636_Transcript_17/122_Confidence_0.157_Length_2013, vo_n3_Locus_37_Transcript_16/46_Confidence_0.281_Length_1685, vo_n2_Locus_3_Transcript_22527/24291_Confidence_0.000_Length_1609, vo_n3_Locus_37_Transcript_10/46_Confidence_0.207_Length_1727, vo_n3_Locus_37_Transcript_9/46_Confidence_0.215_Length_1812, vo_c1_Locus_1636_Transcript_122/122_Confidence_0.108_Length_2335, vo_n2_Locus_3_Transcript_22541/24291_Confidence_0.000_Length_288, vo_n2_Locus_3_Transcript_22550/24291_Confidence_0.000_Length_1791, vo_n3_Locus_37_Transcript_33/46_Confidence_0.163_Length_732, vo_n2_Locus_3_Transcript_22526/24291_Confidence_0.000_Length_620, vo_n2_Locus_3_Transcript_22511/24291_Confidence_0.000_Length_798, vo_c1_Locus_1636_Transcript_15/122_Confidence_0.065_Length_512, vo_c2_Locus_52_Transcript_144/466_Confidence_0.025_Length_2131, tri_n_comp20144_c0_seq14, vo_c2_Locus_52_Transcript_133/466_Confidence_0.023_Length_2364, tri_n_comp20144_c0_seq13, vo_n3_Locus_41731_Transcript_1/1_Confidence_0.500_Length_459, vo_c2_Locus_52_Transcript_132/466_Confidence_0.016_Length_1024, vo_n1_Locus_55_Transcript_52/66_Confidence_0.069_Length_313, tri_c_comp20343_c0_seq9, tri_n_comp20144_c0_seq10, tri_n_comp20144_c0_seq7, tri_n_comp20144_c0_seq6, vo_c3_Locus_31_Transcript_6/79_Confidence_0.152_Length_709, tri_n_comp20144_c0_seq3, tri_n_comp20144_c0_seq4, tri_n_comp20144_c0_seq1, vo_c1_Locus_1636_Transcript_86/122_Confidence_0.182_Length_2244, vo_c1_Locus_1636_Transcript_73/122_Confidence_0.222_Length_1747, vo_c2_Locus_52_Transcript_164/466_Confidence_0.011_Length_2810, vo_n2_Locus_3_Transcript_22535/24291_Confidence_0.000_Length_656, vo_n2_Locus_3_Transcript_22546/24291_Confidence_0.000_Length_1498, vo_c3_Locus_31_Transcript_74/79_Confidence_0.124_Length_2769, vo_c3_Locus_31_Transcript_68/79_Confidence_0.124_Length_1224, vo_n3_Locus_37_Transcript_21/46_Confidence_0.148_Length_1139, vo_c3_Locus_31_Transcript_67/79_Confidence_0.152_Length_2229, vo_n3_Locus_37_Transcript_14/46_Confidence_0.259_Length_5942, vo_n1_Locus_55_Transcript_3/66_Confidence_0.063_Length_450, tri_c_comp20343_c0_seq3, tri_c_comp20343_c0_seq3, vo_n2_Locus_3_Transcript_22566/24291_Confidence_0.000_Length_2168, vo_n2_Locus_3452_Transcript_2/4_Confidence_0.636_Length_263, vo_n2_Locus_3_Transcript_22486/24291_Confidence_0.000_Length_1883, vo_c1_Locus_1636_Transcript_120/122_Confidence_0.135_Length_3625, vo_c2_Locus_52_Transcript_120/466_Confidence_0.009_Length_610, vo_c3_Locus_31_Transcript_13/79_Confidence_0.099_Length_748, vo_c1_Locus_1636_Transcript_69/122_Confidence_0.074_Length_844, vo_n2_Locus_3_Transcript_22520/24291_Confidence_0.000_Length_1452, vo_n2_Locus_3_Transcript_22533/24291_Confidence_0.000_Length_679, vo_n2_Locus_3_Transcript_22537/24291_Confidence_0.000_Length_840, vo_c3_Locus_31_Transcript_63/79_Confidence_0.148_Length_3613, vo_c1_Locus_1636_Transcript_71/122_Confidence_0.055_Length_846, vo_c3_Locus_31_Transcript_77/79_Confidence_0.297_Length_1736, vo_c1_Locus_1636_Transcript_83/122_Confidence_0.191_Length_2430, tri_n_comp20833_c0_seq3, vo_c3_Locus_31_Transcript_75/79_Confidence_0.212_Length_8463, vo_c2_Locus_52_Transcript_153/466_Confidence_0.026_Length_1551, vo_c3_Locus_31_Transcript_3/79_Confidence_0.035_Length_301, vo_n2_Locus_3_Transcript_22489/24291_Confidence_0.000_Length_274, vo_n2_Locus_3_Transcript_22509/24291_Confidence_0.000_Length_800, vo_n3_Locus_37_Transcript_38/46_Confidence_0.163_Length_922, tri_c_comp21288_c0_seq1, vo_c1_Locus_1636_Transcript_88/122_Confidence_0.074_Length_1384, vo_c1_Locus_1636_Transcript_121/122_Confidence_0.018_Length_960, vo_n3_Locus_37_Transcript_5/46_Confidence_0.289_Length_1505, vo_n1_Locus_55_Transcript_33/66_Confidence_0.040_Length_1095, vo_c3_Locus_31_Transcript_65/79_Confidence_0.166_Length_2369, vo_c3_Locus_31_Transcript_73/79_Confidence_0.208_Length_2557, vo_c3_Locus_31_Transcript_9/79_Confidence_0.152_Length_714, vo_c2_Locus_52_Transcript_113/466_Confidence_0.004_Length_590, vo_n2_Locus_3_Transcript_22492/24291_Confidence_0.000_Length_1595, vo_n1_Locus_55_Transcript_54/66_Confidence_0.183_Length_2185, vo_c3_Locus_33_Transcript_2/2_Confidence_0.714_Length_611, vo_c2_Locus_52_Transcript_125/466_Confidence_0.007_Length_559, vo_c2_Locus_52_Transcript_135/466_Confidence_0.025_Length_2711, vo_n1_Locus_55_Transcript_12/66_Confidence_0.331_Length_2232, vo_c1_Locus_1636_Transcript_100/122_Confidence_0.031_Length_685, vo_c2_Locus_52_Transcript_131/466_Confidence_0.023_Length_1964, vo_c3_Locus_31_Transcript_7/79_Confidence_0.184_Length_710, vo_n1_Locus_55_Transcript_39/66_Confidence_0.194_Length_1391, vo_n3_Locus_37_Transcript_28/46_Confidence_0.193_Length_1043, vo_n1_Locus_55_Transcript_41/66_Confidence_0.263_Length_1742, vo_n1_Locus_55_Transcript_38/66_Confidence_0.171_Length_1387, vo_n2_Locus_3_Transcript_22491/24291_Confidence_0.000_Length_1174, vo_n3_Locus_37_Transcript_30/46_Confidence_0.178_Length_1043, vo_n2_Locus_3_Transcript_22503/24291_Confidence_0.000_Length_721, vo_n2_Locus_3_Transcript_22540/24291_Confidence_0.000_Length_271, vo_c2_Locus_52_Transcript_128/466_Confidence_0.003_Length_564, vo_c2_Locus_52_Transcript_162/466_Confidence_0.019_Length_1668, vo_n2_Locus_3_Transcript_22534/24291_Confidence_0.000_Length_449, vo_c1_Locus_1636_Transcript_116/122_Confidence_0.129_Length_3526, vo_c3_Locus_31_Transcript_70/79_Confidence_0.208_Length_1586, vo_n1_Locus_55_Transcript_9/66_Confidence_0.349_Length_2172, vo_c1_Locus_8362_Transcript_4/9_Confidence_0.254_Length_482, vo_n1_Locus_55_Transcript_50/66_Confidence_0.166_Length_2379, vo_c3_Locus_1314_Transcript_17/46_Confidence_0.365_Length_2530, vo_n3_Locus_387_Transcript_34/39_Confidence_0.386_Length_2514, vo_c2_Locus_924_Transcript_20/40_Confidence_0.452_Length_2520, vo_c2_Locus_924_Transcript_13/40_Confidence_0.310_Length_2559, vo_c3_Locus_1314_Transcript_33/46_Confidence_0.292_Length_2524, vo_c1_Locus_1204_Transcript_14/17_Confidence_0.394_Length_4476, vo_c2_Locus_924_Transcript_19/40_Confidence_0.333_Length_2562, vo_n1_Locus_327_Transcript_13/41_Confidence_0.275_Length_2480, vo_c3_Locus_1314_Transcript_6/46_Confidence_0.208_Length_1518, vo_n1_Locus_327_Transcript_40/41_Confidence_0.176_Length_2442, vo_c3_Locus_1314_Transcript_38/46_Confidence_0.302_Length_2522, vo_c2_Locus_924_Transcript_34/40_Confidence_0.369_Length_2618, vo_c3_Locus_1314_Transcript_14/46_Confidence_0.229_Length_3828, vo_c2_Locus_924_Transcript_16/40_Confidence_0.321_Length_2559, vo_c2_Locus_924_Transcript_23/40_Confidence_0.488_Length_2850, vo_c3_Locus_1314_Transcript_21/46_Confidence_0.365_Length_2524, vo_c1_Locus_1204_Transcript_13/17_Confidence_0.364_Length_4497, vo_n1_Locus_327_Transcript_24/41_Confidence_0.385_Length_2547,</p> |
|---------------------------------------------|----------|----|-------------------------------------------------------------------------------------------------------------------------------------------------------------------------------------------------------------------------------------------------------------------------------------------------------------------------------------------------------------------------------------------------------------------------------------------------------------------------------------------------------------------------------------------------------------------------------------------------------------------------------------------------------|-----------------------------------------------------------------------|-------------------------------------------------------------------------------------------------------------------------------------------------------------------------------------------------------------------------------------------------------------------------------------------------------------------------------------------------------------------------------------------------------------------------------------------------------------------------------------------------------------------------------------------------------------------------------------------------------------------------------------------------------------------------------------------------------------------------------------------------------------------------------------------------------------------------------------------------------------------------------------------------------------------------------------------------------------------------------------------------------------------------------------------------------------------------------------------------------------------------------------------------------------------------------------------------------------------------------------------------------------------------------------------------------------------------------------------------------------------------------------------------------------------------------------------------------------------------------------------------------------------------------------------------------------------------------------------------------------------------------------------------------------------------------------------------------------------------------------------------------------------------------------------------------------------------------------------------------------------------------------------------------------------------------------------------------------------------------------------------------------------------------------------------------------------------------------------------------------------------------------------------------------------------------------------------------------------------------------------------------------------------------------------------------------------------------------------------------------------------------------------------------------------------------------------------------------------------------------------------------------------------------------------------------------------------------------------------------------------------------------------------------------------------------------------------------------------------------------------------------------------------------------------------------------------------------------------------------------------------------------------------------------------------------------------------------------------------------------------------------------------------------------------------------------------------------------------------------------------------------------------------------------------------------------------------------------------------------------------------------------------------------------------------------------------------------------------------------------------------------------------------------------------------------------------------------------------------------------------------------------------------------------------------------------------------------------------------------------------------------------------------------------------------------------------------------------------------------------------------------------------------------------------------------------------------------------------------------------------------------------------------------------------------------------------------------------------------------------------------------------------------------------------------------------------------------------------------------------------------------------------------------------------------------------------------------------------------------------------------------------------------------------------------------------------------------------------------------------------------------------------------------------------------------------------------------------------------------------------------------------------------------------------------------------------------------------------------------------------------------------------------------------------------------------------------------------------------------------------------------------------------------------------------------------------------------------------------------------------------------------------------------------------------------------------------------------------------------------------------------------------------------------------------------------------------------------------------------------------------------------------------------------------------------------------------------------------------------------------------------------------------------------------------------------------------------------------------------------------------------------------------------------------------------------------------------------------------------------------------------------------------------------------------------------------------------------------------------------------------------------------------------------------------------------------------------------------------------------------------------------------------------------------------------------------------------------------------------------------------------------------------------------------------------------------------------------------------------------------------------------------------------------------------------------------------------------------------------------------------------------------------------------------------------------------------------------------------------------------------------------------------------------------------------------------------------------------------------------------------------------------------------------------------------------------------------------------------------------------------------------------------------------------------------------------------------------------------------------------------------------------------------------------------------------------------------------------------------------------------------------------------------------------------------------------------------------------------------------------------------------------------------------------------------------------------------------------------------------------------------------------------------------------------------------------------------------------------------------------------------------------------------------------------------------------------------------------------------------------------------------------------------------|

|  |  |  |  |                                                                                                                                                                                                                                                                                                                                                                                                                                                                                                                                                                                                                                                                                                                                                                                                                                                                                                                                                                                                                                                                                                                                                                                                                                                                                                                                                                                                                                                                                                                                                                                                                                                                                                                                                                                                                                                                                                                                                                                                                                                                                                                                                                                                                                                                                                                                                                                                                                                                                                                                                                                                                                                                                                                                                                                                                                                                                                                                                                                                                                                                                                                                                                                                                                                                                                                                                                                                                                                                                                                                                                                                                                                                                                                                                                                                                                                                                                                                                                                                                                                                                                                                                                                                                                                                                                                                                                                                                                                                                                                                                                                                                                                                                                                                                                                                                                                                                                                                                                                                                                                                                                                                                                                                                                                                                                                                                                                                                                                                                                                                                                                                                                                                                                                                                                                                                                                                                                                                                                                                                                                                                                                                                                                                                                                                                                                                                                                                                                                                                                                                                                                                                                                                                                                                                                                                                                                                                                                                                                                                                                                                                                                                                            |
|--|--|--|--|------------------------------------------------------------------------------------------------------------------------------------------------------------------------------------------------------------------------------------------------------------------------------------------------------------------------------------------------------------------------------------------------------------------------------------------------------------------------------------------------------------------------------------------------------------------------------------------------------------------------------------------------------------------------------------------------------------------------------------------------------------------------------------------------------------------------------------------------------------------------------------------------------------------------------------------------------------------------------------------------------------------------------------------------------------------------------------------------------------------------------------------------------------------------------------------------------------------------------------------------------------------------------------------------------------------------------------------------------------------------------------------------------------------------------------------------------------------------------------------------------------------------------------------------------------------------------------------------------------------------------------------------------------------------------------------------------------------------------------------------------------------------------------------------------------------------------------------------------------------------------------------------------------------------------------------------------------------------------------------------------------------------------------------------------------------------------------------------------------------------------------------------------------------------------------------------------------------------------------------------------------------------------------------------------------------------------------------------------------------------------------------------------------------------------------------------------------------------------------------------------------------------------------------------------------------------------------------------------------------------------------------------------------------------------------------------------------------------------------------------------------------------------------------------------------------------------------------------------------------------------------------------------------------------------------------------------------------------------------------------------------------------------------------------------------------------------------------------------------------------------------------------------------------------------------------------------------------------------------------------------------------------------------------------------------------------------------------------------------------------------------------------------------------------------------------------------------------------------------------------------------------------------------------------------------------------------------------------------------------------------------------------------------------------------------------------------------------------------------------------------------------------------------------------------------------------------------------------------------------------------------------------------------------------------------------------------------------------------------------------------------------------------------------------------------------------------------------------------------------------------------------------------------------------------------------------------------------------------------------------------------------------------------------------------------------------------------------------------------------------------------------------------------------------------------------------------------------------------------------------------------------------------------------------------------------------------------------------------------------------------------------------------------------------------------------------------------------------------------------------------------------------------------------------------------------------------------------------------------------------------------------------------------------------------------------------------------------------------------------------------------------------------------------------------------------------------------------------------------------------------------------------------------------------------------------------------------------------------------------------------------------------------------------------------------------------------------------------------------------------------------------------------------------------------------------------------------------------------------------------------------------------------------------------------------------------------------------------------------------------------------------------------------------------------------------------------------------------------------------------------------------------------------------------------------------------------------------------------------------------------------------------------------------------------------------------------------------------------------------------------------------------------------------------------------------------------------------------------------------------------------------------------------------------------------------------------------------------------------------------------------------------------------------------------------------------------------------------------------------------------------------------------------------------------------------------------------------------------------------------------------------------------------------------------------------------------------------------------------------------------------------------------------------------------------------------------------------------------------------------------------------------------------------------------------------------------------------------------------------------------------------------------------------------------------------------------------------------------------------------------------------------------------------------------------------------------------------------------------------------------------------------------------|
|  |  |  |  | <p>vo_c2_Locus_924_Transcript_17/40_Confidence_0.333_Length_2453, tri_c_comp20608_c0_seq4, tri_c_comp20608_c0_seq5, vo_c3_Locus_1314_Transcript_43/46_Confidence_0.198_Length_2519, vo_n2_Locus_2054_Transcript_26/37_Confidence_0.448_Length_2522, tri_c_comp20608_c0_seq7, vo_n3_Locus_2623_Transcript_14/17_Confidence_0.556_Length_1555, vo_n3_Locus_74_Transcript_17/25_Confidence_0.436_Length_1764, vo_c1_Locus_788_Transcript_17/34_Confidence_0.404_Length_1861, vo_c1_Locus_788_Transcript_30/34_Confidence_0.255_Length_1712, tri_c_comp19022_c0_seq2, vo_c3_Locus_239_Transcript_24/29_Confidence_0.409_Length_3108, vo_c2_Locus_298_Transcript_10/24_Confidence_0.500_Length_1796, tri_n_comp18813_c0_seq15, vo_n2_Locus_106_Transcript_17/30_Confidence_0.344_Length_2068, tri_n_comp18813_c0_seq11, vo_n1_Locus_2248_Transcript_15/40_Confidence_0.275_Length_1844, tri_n_comp18813_c0_seq10, tri_n_comp20156_c0_seq1, vo_c2_Locus_3634_Transcript_2/8_Confidence_0.467_Length_2376, vo_c1_Locus_788_Transcript_5/34_Confidence_0.340_Length_1423, vo_n2_Locus_2252_Transcript_14/26_Confidence_0.410_Length_2227, vo_c3_Locus_239_Transcript_16/29_Confidence_0.364_Length_1433, vo_c3_Locus_2347_Transcript_16/16_Confidence_0.270_Length_1737, vo_c2_Locus_298_Transcript_21/24_Confidence_0.368_Length_1678, vo_c3_Locus_3927_Transcript_2/9_Confidence_0.250_Length_2629, vo_c2_Locus_3634_Transcript_8/8_Confidence_0.133_Length_2428, vo_c2_Locus_2437_Transcript_14/25_Confidence_0.455_Length_1511, vo_c1_Locus_3033_Transcript_3/5_Confidence_0.400_Length_2348, vo_c3_Locus_239_Transcript_29/29_Confidence_0.182_Length_2208, vo_n3_Locus_2623_Transcript_15/17_Confidence_0.361_Length_1551, vo_c3_Locus_2347_Transcript_5/16_Confidence_0.514_Length_1554, vo_c3_Locus_239_Transcript_19/29_Confidence_0.295_Length_1502, vo_c2_Locus_2437_Transcript_25/25_Confidence_0.159_Length_1517, vo_n2_Locus_2252_Transcript_22/26_Confidence_0.256_Length_2337, vo_n2_Locus_2252_Transcript_23/26_Confidence_0.359_Length_1959, vo_c3_Locus_239_Transcript_10/29_Confidence_0.386_Length_1727, vo_c1_Locus_788_Transcript_6/34_Confidence_0.362_Length_1766, vo_c1_Locus_788_Transcript_22/34_Confidence_0.277_Length_1358, vo_n1_Locus_2248_Transcript_26/40_Confidence_0.333_Length_1991, tri_c_comp20571_c0_seq1, vo_n2_Locus_2252_Transcript_18/26_Confidence_0.256_Length_1506, vo_c1_Locus_788_Transcript_11/34_Confidence_0.213_Length_2514, vo_c2_Locus_907_Transcript_3/3_Confidence_0.333_Length_630, vo_n2_Locus_7087_Transcript_1/2_Confidence_0.500_Length_4087, vo_n1_Locus_2248_Transcript_2/40_Confidence_0.373_Length_1784, vo_n2_Locus_2980_Transcript_1/1_Confidence_0.333_Length_1623, vo_c3_Locus_550_Transcript_25/30_Confidence_0.321_Length_1640, vo_c3_Locus_550_Transcript_10/30_Confidence_0.420_Length_1515, vo_n1_Locus_133_Transcript_12/30_Confidence_0.033_Length_580, vo_c2_Locus_320_Transcript_7/32_Confidence_0.299_Length_1642, vo_c3_Locus_550_Transcript_27/30_Confidence_0.395_Length_1758, vo_c2_Locus_320_Transcript_9/32_Confidence_0.338_Length_1673, vo_c2_Locus_320_Transcript_22/32_Confidence_0.545_Length_1648, vo_c3_Locus_550_Transcript_30/30_Confidence_0.210_Length_1413, vo_c3_Locus_550_Transcript_8/30_Confidence_0.148_Length_1492, vo_n3_Locus_587_Transcript_13/22_Confidence_0.444_Length_1456, vo_n2_Locus_105_Transcript_30/33_Confidence_0.449_Length_1990, vo_c3_Locus_550_Transcript_28/30_Confidence_0.309_Length_1831, vo_c2_Locus_320_Transcript_20/32_Confidence_0.325_Length_1586, vo_n1_Locus_133_Transcript_30/30_Confidence_0.033_Length_2622, vo_c2_Locus_320_Transcript_13/32_Confidence_0.351_Length_2604, vo_c2_Locus_320_Transcript_15/32_Confidence_0.390_Length_1557, vo_c2_Locus_500_Transcript_3/29_Confidence_0.344_Length_1522, vo_c3_Locus_527_Transcript_60/87_Confidence_0.092_Length_2707, vo_n2_Locus_560_Transcript_46/53_Confidence_0.118_Length_1515, vo_n2_Locus_560_Transcript_41/53_Confidence_0.300_Length_1572, vo_c2_Locus_500_Transcript_4/29_Confidence_0.377_Length_1516, vo_c2_Locus_500_Transcript_13/29_Confidence_0.328_Length_1409, vo_c2_Locus_500_Transcript_15/29_Confidence_0.393_Length_1699, vo_n3_Locus_874_Transcript_21/35_Confidence_0.236_Length_1484, vo_c2_Locus_500_Transcript_28/29_Confidence_0.279_Length_1509, vo_n3_Locus_874_Transcript_32/35_Confidence_0.270_Length_1521, vo_n1_Locus_1829_Transcript_21/31_Confidence_0.519_Length_1458, vo_n3_Locus_874_Transcript_27/35_Confidence_0.303_Length_1523, vo_n2_Locus_560_Transcript_47/53_Confidence_0.173_Length_1554, vo_n3_Locus_874_Transcript_28/35_Confidence_0.213_Length_1767, vo_c1_Locus_962_Transcript_32/36_Confidence_0.383_Length_1689, vo_n2_Locus_560_Transcript_43/53_Confidence_0.273_Length_2234, vo_c3_Locus_527_Transcript_66/87_Confidence_0.220_Length_3076, vo_c2_Locus_500_Transcript_2/29_Confidence_0.328_Length_1849, vo_n1_Locus_1829_Transcript_31/31_Confidence_0.269_Length_1123, vo_n2_Locus_560_Transcript_50/53_Confidence_0.227_Length_1564, vo_c1_Locus_962_Transcript_33/36_Confidence_0.383_Length_1437, vo_c1_Locus_962_Transcript_29/36_Confidence_0.417_Length_1683, vo_c2_Locus_500_Transcript_27/29_Confidence_0.262_Length_1458, vo_n3_Locus_874_Transcript_8/35_Confidence_0.315_Length_1484, vo_n2_Locus_560_Transcript_36/53_Confidence_0.245_Length_1639, vo_c3_Locus_550_Transcript_25/30_Confidence_0.321_Length_1640, vo_c3_Locus_550_Transcript_10/30_Confidence_0.420_Length_1515, vo_n1_Locus_133_Transcript_12/30_Confidence_0.033_Length_580, vo_n2_Locus_13049_Transcript_20/20_Confidence_0.289_Length_1233, vo_c3_Locus_1015_Transcript_30/32_Confidence_0.181_Length_1172, vo_n2_Locus_13049_Transcript_19/20_Confidence_0.368_Length_1268, vo_c3_Locus_550_Transcript_27/30_Confidence_0.395_Length_1758, vo_n1_Locus_296_Transcript_24/31_Confidence_0.275_Length_1182, vo_n2_Locus_13049_Transcript_17/20_Confidence_0.342_Length_1329, vo_c3_Locus_1015_Transcript_13/32_Confidence_0.222_Length_1363, vo_c2_Locus_1551_Transcript_19/27_Confidence_0.222_Length_1248, vo_n1_Locus_296_Transcript_27/31_Confidence_0.078_Length_2886, vo_c3_Locus_1015_Transcript_3/32_Confidence_0.181_Length_1206, vo_n2_Locus_105_Transcript_30/33_Confidence_0.449_Length_1990, vo_c3_Locus_550_Transcript_28/30_Confidence_0.309_Length_1831, vo_n3_Locus_150_Transcript_17/25_Confidence_0.183_Length_1185, vo_n3_Locus_150_Transcript_6/25_Confidence_0.232_Length_1192, vo_n1_Locus_133_Transcript_30/30_Confidence_0.033_Length_2622, tri_c_comp21115_c0_seq1, vo_n3_Locus_587_Transcript_2/22_Confidence_0.111_Length_206, vo_c2_Locus_320_Transcript_13/32_Confidence_0.351_Length_2604, vo_n1_Locus_296_Transcript_25/31_Confidence_0.157_Length_1180, vo_n2_Locus_13049_Transcript_7/20_Confidence_0.421_Length_1354, vo_c1_Locus_223_Transcript_13/65_Confidence_0.197_Length_1636, vo_c1_Locus_223_Transcript_47/65_Confidence_0.099_Length_1259, vo_c2_Locus_320_Transcript_7/32_Confidence_0.299_Length_1642, vo_n1_Locus_133_Transcript_14/30_Confidence_0.456_Length_2738,</p> |
|--|--|--|--|------------------------------------------------------------------------------------------------------------------------------------------------------------------------------------------------------------------------------------------------------------------------------------------------------------------------------------------------------------------------------------------------------------------------------------------------------------------------------------------------------------------------------------------------------------------------------------------------------------------------------------------------------------------------------------------------------------------------------------------------------------------------------------------------------------------------------------------------------------------------------------------------------------------------------------------------------------------------------------------------------------------------------------------------------------------------------------------------------------------------------------------------------------------------------------------------------------------------------------------------------------------------------------------------------------------------------------------------------------------------------------------------------------------------------------------------------------------------------------------------------------------------------------------------------------------------------------------------------------------------------------------------------------------------------------------------------------------------------------------------------------------------------------------------------------------------------------------------------------------------------------------------------------------------------------------------------------------------------------------------------------------------------------------------------------------------------------------------------------------------------------------------------------------------------------------------------------------------------------------------------------------------------------------------------------------------------------------------------------------------------------------------------------------------------------------------------------------------------------------------------------------------------------------------------------------------------------------------------------------------------------------------------------------------------------------------------------------------------------------------------------------------------------------------------------------------------------------------------------------------------------------------------------------------------------------------------------------------------------------------------------------------------------------------------------------------------------------------------------------------------------------------------------------------------------------------------------------------------------------------------------------------------------------------------------------------------------------------------------------------------------------------------------------------------------------------------------------------------------------------------------------------------------------------------------------------------------------------------------------------------------------------------------------------------------------------------------------------------------------------------------------------------------------------------------------------------------------------------------------------------------------------------------------------------------------------------------------------------------------------------------------------------------------------------------------------------------------------------------------------------------------------------------------------------------------------------------------------------------------------------------------------------------------------------------------------------------------------------------------------------------------------------------------------------------------------------------------------------------------------------------------------------------------------------------------------------------------------------------------------------------------------------------------------------------------------------------------------------------------------------------------------------------------------------------------------------------------------------------------------------------------------------------------------------------------------------------------------------------------------------------------------------------------------------------------------------------------------------------------------------------------------------------------------------------------------------------------------------------------------------------------------------------------------------------------------------------------------------------------------------------------------------------------------------------------------------------------------------------------------------------------------------------------------------------------------------------------------------------------------------------------------------------------------------------------------------------------------------------------------------------------------------------------------------------------------------------------------------------------------------------------------------------------------------------------------------------------------------------------------------------------------------------------------------------------------------------------------------------------------------------------------------------------------------------------------------------------------------------------------------------------------------------------------------------------------------------------------------------------------------------------------------------------------------------------------------------------------------------------------------------------------------------------------------------------------------------------------------------------------------------------------------------------------------------------------------------------------------------------------------------------------------------------------------------------------------------------------------------------------------------------------------------------------------------------------------------------------------------------------------------------------------------------------------------------------------------------------------------------------------------------------------------|

|  |  |  |  |                                                                                                                                                                                                                                                                                                                                                                                                                                                                                                                                                                                                                                                                                                                                                                                                                                                                                                                                                                                                                                                                                                                                                                                                                                                                                                                                                                                                                                                                                                                                                                                                                                                                                                                                                                                                                                                                                                                                                                                                                                                                                                                                                                                                                                                                                                                                                                                                                                                                                                                                                                                                                                                                                                                                                                                                                                                                                                                                                                                                                                                                                                                                                                                                                                                                                                                                                                                                                                                                                                                                                                                                                                                                                                                                                                                                                                                                                                                                                                                                                                                                                                                                                                                                                                                                                                                                                                                                                                                                                                                                                                                                                                                                                                                                                                                                                                                                                                                                                                                                                                                                                                                                                                                                                                                                                                                                                                                                                                                                                                                                                                                                                                                                                                                                                                                                                                                                                                                                                                                                                                                                                                                                                                                                                                                                                                                                                                                                                                                                                                                                                                                                                                                                                                                                                                                                                                                                                                                                                                                                                                                                                                                                                          |
|--|--|--|--|----------------------------------------------------------------------------------------------------------------------------------------------------------------------------------------------------------------------------------------------------------------------------------------------------------------------------------------------------------------------------------------------------------------------------------------------------------------------------------------------------------------------------------------------------------------------------------------------------------------------------------------------------------------------------------------------------------------------------------------------------------------------------------------------------------------------------------------------------------------------------------------------------------------------------------------------------------------------------------------------------------------------------------------------------------------------------------------------------------------------------------------------------------------------------------------------------------------------------------------------------------------------------------------------------------------------------------------------------------------------------------------------------------------------------------------------------------------------------------------------------------------------------------------------------------------------------------------------------------------------------------------------------------------------------------------------------------------------------------------------------------------------------------------------------------------------------------------------------------------------------------------------------------------------------------------------------------------------------------------------------------------------------------------------------------------------------------------------------------------------------------------------------------------------------------------------------------------------------------------------------------------------------------------------------------------------------------------------------------------------------------------------------------------------------------------------------------------------------------------------------------------------------------------------------------------------------------------------------------------------------------------------------------------------------------------------------------------------------------------------------------------------------------------------------------------------------------------------------------------------------------------------------------------------------------------------------------------------------------------------------------------------------------------------------------------------------------------------------------------------------------------------------------------------------------------------------------------------------------------------------------------------------------------------------------------------------------------------------------------------------------------------------------------------------------------------------------------------------------------------------------------------------------------------------------------------------------------------------------------------------------------------------------------------------------------------------------------------------------------------------------------------------------------------------------------------------------------------------------------------------------------------------------------------------------------------------------------------------------------------------------------------------------------------------------------------------------------------------------------------------------------------------------------------------------------------------------------------------------------------------------------------------------------------------------------------------------------------------------------------------------------------------------------------------------------------------------------------------------------------------------------------------------------------------------------------------------------------------------------------------------------------------------------------------------------------------------------------------------------------------------------------------------------------------------------------------------------------------------------------------------------------------------------------------------------------------------------------------------------------------------------------------------------------------------------------------------------------------------------------------------------------------------------------------------------------------------------------------------------------------------------------------------------------------------------------------------------------------------------------------------------------------------------------------------------------------------------------------------------------------------------------------------------------------------------------------------------------------------------------------------------------------------------------------------------------------------------------------------------------------------------------------------------------------------------------------------------------------------------------------------------------------------------------------------------------------------------------------------------------------------------------------------------------------------------------------------------------------------------------------------------------------------------------------------------------------------------------------------------------------------------------------------------------------------------------------------------------------------------------------------------------------------------------------------------------------------------------------------------------------------------------------------------------------------------------------------------------------------------------------------------------------------------------------------------------------------------------------------------------------------------------------------------------------------------------------------------------------------------------------------------------------------------------------------------------------------------------------------------------------------------------------------------------------------------------------------------------------------------------------------------------------------|
|  |  |  |  | <p>vo_c3_Locus_1015_Transcript_12/32_Confidence_0.222_Length_1270, vo_c2_Locus_320_Transcript_9/32_Confidence_0.338_Length_1673, vo_c2_Locus_320_Transcript_22/32_Confidence_0.545_Length_1648, vo_n1_Locus_296_Transcript_23/31_Confidence_0.294_Length_1182, vo_n2_Locus_13049_Transcript_9/20_Confidence_0.316_Length_1224, vo_c1_Locus_223_Transcript_52/65_Confidence_0.042_Length_799, vo_c3_Locus_550_Transcript_30/30_Confidence_0.210_Length_1413, vo_n1_Locus_133_Transcript_13/30_Confidence_0.456_Length_2508, vo_n1_Locus_133_Transcript_24/30_Confidence_0.311_Length_1984, vo_n1_Locus_296_Transcript_30/31_Confidence_0.078_Length_1319, vo_n1_Locus_133_Transcript_15/30_Confidence_0.456_Length_2671, vo_c2_Locus_320_Transcript_20/32_Confidence_0.325_Length_1586, vo_c1_Locus_223_Transcript_19/65_Confidence_0.092_Length_1454, vo_n1_Locus_296_Transcript_10/31_Confidence_0.118_Length_1164, vo_c1_Locus_223_Transcript_54/65_Confidence_0.134_Length_1458, vo_c2_Locus_320_Transcript_15/32_Confidence_0.390_Length_1557, vo_c3_Locus_1015_Transcript_9/32_Confidence_0.236_Length_1272, vo_n1_Locus_133_Transcript_25/30_Confidence_0.278_Length_2179, vo_c2_Locus_3634_Transcript_8/8_Confidence_0.133_Length_2428, vo_c2_Locus_324_Transcript_5/12_Confidence_0.333_Length_1009, vo_n1_Locus_5721_Transcript_6/9_Confidence_0.389_Length_989, vo_c2_Locus_324_Transcript_11/12_Confidence_0.333_Length_4393, vo_n2_Locus_475_Transcript_7/13_Confidence_0.312_Length_1141, vo_n1_Locus_5721_Transcript_1/9_Confidence_0.278_Length_986, vo_n2_Locus_475_Transcript_2/13_Confidence_0.312_Length_1187, vo_c2_Locus_324_Transcript_2/12_Confidence_0.400_Length_1106, vo_c3_Locus_3927_Transcript_2/9_Confidence_0.250_Length_2629, vo_c1_Locus_34898_Transcript_1/1_Confidence_0.000_Length_1083, vo_n2_Locus_8097_Transcript_1/6_Confidence_0.500_Length_1196, vo_n1_Locus_3423_Transcript_2/4_Confidence_0.250_Length_1347, tri_n_comp27683_c0_seq1, vo_c1_Locus_3127_Transcript_1/1_Confidence_0.000_Length_1478, vo_n1_Locus_3423_Transcript_3/4_Confidence_0.250_Length_1416, vo_n1_Locus_565_Transcript_31/31_Confidence_0.178_Length_3922, vo_c3_Locus_2800_Transcript_3/23_Confidence_0.566_Length_1690, vo_c3_Locus_2800_Transcript_9/23_Confidence_0.585_Length_1396, tri_n_comp21653_c0_seq1, vo_n1_Locus_565_Transcript_5/31_Confidence_0.244_Length_1533, vo_n2_Locus_4661_Transcript_5/12_Confidence_0.208_Length_1240, vo_n1_Locus_565_Transcript_17/31_Confidence_0.422_Length_1454, vo_c3_Locus_2800_Transcript_5/23_Confidence_0.566_Length_2133, vo_c1_Locus_1757_Transcript_17/19_Confidence_0.375_Length_1367, vo_c1_Locus_298_Transcript_4/32_Confidence_0.255_Length_1585, vo_n1_Locus_8402_Transcript_3/4_Confidence_0.286_Length_1464, vo_c3_Locus_2800_Transcript_23/23_Confidence_0.151_Length_1466, vo_n2_Locus_903_Transcript_38/40_Confidence_0.222_Length_6612, vo_n1_Locus_565_Transcript_20/31_Confidence_0.444_Length_1622, vo_n2_Locus_2046_Transcript_7/18_Confidence_0.345_Length_1296, vo_c3_Locus_2800_Transcript_8/23_Confidence_0.585_Length_1344, vo_n3_Locus_1119_Transcript_19/50_Confidence_0.050_Length_498, vo_c2_Locus_5742_Transcript_10/21_Confidence_0.244_Length_1454, vo_n3_Locus_1119_Transcript_11/50_Confidence_0.124_Length_2839, vo_c2_Locus_5742_Transcript_18/21_Confidence_0.317_Length_2233, vo_n1_Locus_565_Transcript_13/31_Confidence_0.378_Length_1400, vo_c3_Locus_2800_Transcript_14/23_Confidence_0.321_Length_1426, vo_c3_Locus_614_Transcript_19/24_Confidence_0.394_Length_3443, vo_c2_Locus_358_Transcript_1/41_Confidence_0.080_Length_1708, vo_c2_Locus_5742_Transcript_14/21_Confidence_0.439_Length_2413, vo_c1_Locus_1757_Transcript_8/19_Confidence_0.458_Length_1460, vo_n1_Locus_986_Transcript_16/36_Confidence_0.211_Length_1811, vo_n1_Locus_565_Transcript_16/31_Confidence_0.400_Length_1499, vo_n2_Locus_903_Transcript_37/40_Confidence_0.346_Length_3926, tri_c_comp20312_c0_seq4, vo_c3_Locus_614_Transcript_13/24_Confidence_0.061_Length_4970, vo_n2_Locus_2046_Transcript_11/18_Confidence_0.310_Length_1666, vo_n2_Locus_903_Transcript_31/40_Confidence_0.321_Length_2251, vo_n1_Locus_565_Transcript_30/31_Confidence_0.422_Length_3814, vo_c3_Locus_614_Transcript_2/24_Confidence_0.485_Length_1777, vo_n1_Locus_5148_Transcript_1/4_Confidence_0.667_Length_1983, vo_c1_Locus_10454_Transcript_1/2_Confidence_0.750_Length_1441, vo_n3_Locus_1119_Transcript_18/50_Confidence_0.149_Length_1959, vo_c3_Locus_6221_Transcript_1/1_Confidence_0.000_Length_1565, vo_c2_Locus_6460_Transcript_1/2_Confidence_1.000_Length_1563, vo_n2_Locus_3068_Transcript_1/3_Confidence_0.250_Length_1485, vo_n3_Locus_1573_Transcript_4/9_Confidence_0.364_Length_1074, vo_n2_Locus_3298_Transcript_6/11_Confidence_0.333_Length_1072, vo_n1_Locus_7783_Transcript_1/2_Confidence_0.667_Length_900, vo_c2_Locus_40594_Transcript_2/3_Confidence_0.500_Length_1728, vo_n2_Locus_39295_Transcript_2/2_Confidence_0.500_Length_1939, vo_c2_Locus_6460_Transcript_1/2_Confidence_1.000_Length_1563, vo_n1_Locus_3261_Transcript_3/4_Confidence_0.667_Length_1633, vo_n3_Locus_27_Transcript_1/1_Confidence_0.000_Length_1278, tri_c_comp23875_c0_seq1, tri_c_comp24147_c0_seq1, vo_c1_Locus_4576_Transcript_2/2_Confidence_0.000_Length_1644, vo_c3_Locus_1723_Transcript_29/37_Confidence_0.411_Length_1695, vo_n2_Locus_330_Transcript_25/38_Confidence_0.361_Length_1516, vo_c3_Locus_1723_Transcript_35/37_Confidence_0.464_Length_1702, vo_c1_Locus_7371_Transcript_4/4_Confidence_0.600_Length_1352, vo_c3_Locus_1723_Transcript_37/37_Confidence_0.214_Length_1530, vo_n1_Locus_769_Transcript_28/41_Confidence_0.400_Length_1609, vo_n1_Locus_769_Transcript_9/41_Confidence_0.460_Length_1494, vo_c3_Locus_2965_Transcript_2/2_Confidence_0.250_Length_1327, vo_n2_Locus_330_Transcript_5/38_Confidence_0.328_Length_11715, vo_n1_Locus_9772_Transcript_1/2_Confidence_0.333_Length_1224, vo_c1_Locus_3603_Transcript_44/48_Confidence_0.492_Length_1696, vo_c2_Locus_4242_Transcript_2/3_Confidence_0.400_Length_1168, vo_n1_Locus_6649_Transcript_2/3_Confidence_0.500_Length_2124, vo_c1_Locus_7371_Transcript_1/4_Confidence_0.500_Length_1352, vo_n3_Locus_2381_Transcript_2/3_Confidence_0.500_Length_1330, vo_c3_Locus_1723_Transcript_16/37_Confidence_0.286_Length_1491, vo_n1_Locus_769_Transcript_36/41_Confidence_0.420_Length_1536, vo_n1_Locus_769_Transcript_40/41_Confidence_0.320_Length_1479, vo_n1_Locus_6649_Transcript_1/3_Confidence_0.750_Length_1883, vo_c1_Locus_3603_Transcript_26/48_Confidence_0.400_Length_1432, vo_n1_Locus_5348_Transcript_2/2_Confidence_0.200_Length_1608, vo_n3_Locus_3383_Transcript_35/37_Confidence_0.389_Length_1512, tri_c_comp20802_c0_seq1, vo_c3_Locus_1723_Transcript_29/37_Confidence_0.411_Length_1695, vo_n2_Locus_330_Transcript_25/38_Confidence_0.361_Length_1516, vo_c3_Locus_1723_Transcript_35/37_Confidence_0.464_Length_1702, vo_c1_Locus_15206_Transcript_3/3_Confidence_0.000_Length_1312, vo_c1_Locus_7371_Transcript_4/4_Confidence_0.600_Length_1352,</p> |
|--|--|--|--|----------------------------------------------------------------------------------------------------------------------------------------------------------------------------------------------------------------------------------------------------------------------------------------------------------------------------------------------------------------------------------------------------------------------------------------------------------------------------------------------------------------------------------------------------------------------------------------------------------------------------------------------------------------------------------------------------------------------------------------------------------------------------------------------------------------------------------------------------------------------------------------------------------------------------------------------------------------------------------------------------------------------------------------------------------------------------------------------------------------------------------------------------------------------------------------------------------------------------------------------------------------------------------------------------------------------------------------------------------------------------------------------------------------------------------------------------------------------------------------------------------------------------------------------------------------------------------------------------------------------------------------------------------------------------------------------------------------------------------------------------------------------------------------------------------------------------------------------------------------------------------------------------------------------------------------------------------------------------------------------------------------------------------------------------------------------------------------------------------------------------------------------------------------------------------------------------------------------------------------------------------------------------------------------------------------------------------------------------------------------------------------------------------------------------------------------------------------------------------------------------------------------------------------------------------------------------------------------------------------------------------------------------------------------------------------------------------------------------------------------------------------------------------------------------------------------------------------------------------------------------------------------------------------------------------------------------------------------------------------------------------------------------------------------------------------------------------------------------------------------------------------------------------------------------------------------------------------------------------------------------------------------------------------------------------------------------------------------------------------------------------------------------------------------------------------------------------------------------------------------------------------------------------------------------------------------------------------------------------------------------------------------------------------------------------------------------------------------------------------------------------------------------------------------------------------------------------------------------------------------------------------------------------------------------------------------------------------------------------------------------------------------------------------------------------------------------------------------------------------------------------------------------------------------------------------------------------------------------------------------------------------------------------------------------------------------------------------------------------------------------------------------------------------------------------------------------------------------------------------------------------------------------------------------------------------------------------------------------------------------------------------------------------------------------------------------------------------------------------------------------------------------------------------------------------------------------------------------------------------------------------------------------------------------------------------------------------------------------------------------------------------------------------------------------------------------------------------------------------------------------------------------------------------------------------------------------------------------------------------------------------------------------------------------------------------------------------------------------------------------------------------------------------------------------------------------------------------------------------------------------------------------------------------------------------------------------------------------------------------------------------------------------------------------------------------------------------------------------------------------------------------------------------------------------------------------------------------------------------------------------------------------------------------------------------------------------------------------------------------------------------------------------------------------------------------------------------------------------------------------------------------------------------------------------------------------------------------------------------------------------------------------------------------------------------------------------------------------------------------------------------------------------------------------------------------------------------------------------------------------------------------------------------------------------------------------------------------------------------------------------------------------------------------------------------------------------------------------------------------------------------------------------------------------------------------------------------------------------------------------------------------------------------------------------------------------------------------------------------------------------------------------------------------------------------------------------------------------------------------------------------------------------------|

|  |  |  |  |  |                                                                                                                                                                                                                                                                                                                                                                                                                                                                                                                                                                                                                                                                                                                                                                                                                                                                                                                                                                                                                                                                                                                                                                                                                                                                                                                                                                                                                                                                                                                                                                                                                                                                                                                                                                                                                                                                                                                                                                                                                                                                                                                                                                                                                                                                                   |
|--|--|--|--|--|-----------------------------------------------------------------------------------------------------------------------------------------------------------------------------------------------------------------------------------------------------------------------------------------------------------------------------------------------------------------------------------------------------------------------------------------------------------------------------------------------------------------------------------------------------------------------------------------------------------------------------------------------------------------------------------------------------------------------------------------------------------------------------------------------------------------------------------------------------------------------------------------------------------------------------------------------------------------------------------------------------------------------------------------------------------------------------------------------------------------------------------------------------------------------------------------------------------------------------------------------------------------------------------------------------------------------------------------------------------------------------------------------------------------------------------------------------------------------------------------------------------------------------------------------------------------------------------------------------------------------------------------------------------------------------------------------------------------------------------------------------------------------------------------------------------------------------------------------------------------------------------------------------------------------------------------------------------------------------------------------------------------------------------------------------------------------------------------------------------------------------------------------------------------------------------------------------------------------------------------------------------------------------------|
|  |  |  |  |  | <p>vo_c3_Locus_1723_Transcript_37/37_Confidence_0.214_Length_1530, vo_n1_Locus_769_Transcript_28/41_Confidence_0.400_Length_1609, vo_n1_Locus_769_Transcript_9/41_Confidence_0.460_Length_1494, vo_c3_Locus_2965_Transcript_2/2_Confidence_0.250_Length_1327, vo_n2_Locus_330_Transcript_5/38_Confidence_0.328_Length_11715, vo_n1_Locus_9772_Transcript_1/2_Confidence_0.333_Length_1224, vo_c1_Locus_3603_Transcript_44/48_Confidence_0.492_Length_1696, vo_c2_Locus_4242_Transcript_2/3_Confidence_0.400_Length_1168, vo_n1_Locus_6649_Transcript_2/3_Confidence_0.500_Length_2124, vo_c1_Locus_7371_Transcript_1/4_Confidence_0.500_Length_1352, vo_n3_Locus_2381_Transcript_2/3_Confidence_0.500_Length_1330, vo_c3_Locus_1723_Transcript_16/37_Confidence_0.286_Length_1491, vo_n1_Locus_769_Transcript_36/41_Confidence_0.420_Length_1536, vo_n1_Locus_769_Transcript_40/41_Confidence_0.320_Length_1479, vo_n1_Locus_6649_Transcript_1/3_Confidence_0.750_Length_1883, vo_c1_Locus_3603_Transcript_26/48_Confidence_0.400_Length_1432, vo_n1_Locus_5348_Transcript_2/2_Confidence_0.200_Length_1608, vo_n3_Locus_3383_Transcript_35/37_Confidence_0.389_Length_1512, tri_c_comp20802_c0_seq1, vo_c1_Locus_8302_Transcript_51/55_Confidence_0.100_Length_500, vo_n2_Locus_2969_Transcript_26/36_Confidence_0.373_Length_1726, vo_n3_Locus_8916_Transcript_29/29_Confidence_0.191_Length_2143, vo_c1_Locus_8302_Transcript_52/55_Confidence_0.100_Length_554, vo_c1_Locus_8302_Transcript_26/55_Confidence_0.129_Length_1144, vo_n3_Locus_8916_Transcript_11/29_Confidence_0.277_Length_861, vo_n2_Locus_2969_Transcript_30/36_Confidence_0.441_Length_2103, vo_c1_Locus_8302_Transcript_55/55_Confidence_0.043_Length_1090, vo_c3_Locus_20712_Transcript_20/28_Confidence_0.550_Length_2132, tri_c_comp20385_c0_seq1, vo_c1_Locus_8302_Transcript_54/55_Confidence_0.114_Length_1036, vo_n3_Locus_8916_Transcript_29/29_Confidence_0.191_Length_2143, vo_c1_Locus_8302_Transcript_26/55_Confidence_0.129_Length_1144, vo_n3_Locus_8916_Transcript_11/29_Confidence_0.277_Length_861, vo_n2_Locus_2969_Transcript_30/36_Confidence_0.441_Length_2103, vo_c3_Locus_20712_Transcript_20/28_Confidence_0.550_Length_2132, tri_c_comp20385_c0_seq1, tri_c_comp20385_c0_seq4</p> |
|--|--|--|--|--|-----------------------------------------------------------------------------------------------------------------------------------------------------------------------------------------------------------------------------------------------------------------------------------------------------------------------------------------------------------------------------------------------------------------------------------------------------------------------------------------------------------------------------------------------------------------------------------------------------------------------------------------------------------------------------------------------------------------------------------------------------------------------------------------------------------------------------------------------------------------------------------------------------------------------------------------------------------------------------------------------------------------------------------------------------------------------------------------------------------------------------------------------------------------------------------------------------------------------------------------------------------------------------------------------------------------------------------------------------------------------------------------------------------------------------------------------------------------------------------------------------------------------------------------------------------------------------------------------------------------------------------------------------------------------------------------------------------------------------------------------------------------------------------------------------------------------------------------------------------------------------------------------------------------------------------------------------------------------------------------------------------------------------------------------------------------------------------------------------------------------------------------------------------------------------------------------------------------------------------------------------------------------------------|

|                                             |                 |           |                                                                                                                                                                                                                                                                                                                                                                                                                                                                                                                           |                                                             |                                                                                                                                                                                                                                                                                                                                                                                                                                                                                                                                                                                                                                                                                                                                                                                                                                                                                                                                                                                                                                                                                                                                                                                                                                                                                                                                                                                                                                                                                                                                                                                                                                                                                                                                                                                                                                                                                                                                                                                                                                                                                                                                                                                                                                                                                                                                                                                                                                                                                                                                                                                                                                                                                                                                                                                                                                                                                                                                                                                                                                                                                                                                                                                                                                                                                                                                                                                                                                                                                                                                                                                                                                                                                                                                                                                                                                                                            |
|---------------------------------------------|-----------------|-----------|---------------------------------------------------------------------------------------------------------------------------------------------------------------------------------------------------------------------------------------------------------------------------------------------------------------------------------------------------------------------------------------------------------------------------------------------------------------------------------------------------------------------------|-------------------------------------------------------------|----------------------------------------------------------------------------------------------------------------------------------------------------------------------------------------------------------------------------------------------------------------------------------------------------------------------------------------------------------------------------------------------------------------------------------------------------------------------------------------------------------------------------------------------------------------------------------------------------------------------------------------------------------------------------------------------------------------------------------------------------------------------------------------------------------------------------------------------------------------------------------------------------------------------------------------------------------------------------------------------------------------------------------------------------------------------------------------------------------------------------------------------------------------------------------------------------------------------------------------------------------------------------------------------------------------------------------------------------------------------------------------------------------------------------------------------------------------------------------------------------------------------------------------------------------------------------------------------------------------------------------------------------------------------------------------------------------------------------------------------------------------------------------------------------------------------------------------------------------------------------------------------------------------------------------------------------------------------------------------------------------------------------------------------------------------------------------------------------------------------------------------------------------------------------------------------------------------------------------------------------------------------------------------------------------------------------------------------------------------------------------------------------------------------------------------------------------------------------------------------------------------------------------------------------------------------------------------------------------------------------------------------------------------------------------------------------------------------------------------------------------------------------------------------------------------------------------------------------------------------------------------------------------------------------------------------------------------------------------------------------------------------------------------------------------------------------------------------------------------------------------------------------------------------------------------------------------------------------------------------------------------------------------------------------------------------------------------------------------------------------------------------------------------------------------------------------------------------------------------------------------------------------------------------------------------------------------------------------------------------------------------------------------------------------------------------------------------------------------------------------------------------------------------------------------------------------------------------------------------------------|
| <p>Porphyrin and chlorophyll metabolism</p> | <p>map00860</p> | <p>17</p> | <p>ec:1.2.1.70 - reductase,<br/> ec:4.1.1.37 - decarboxylase,<br/> ec:1.3.1.76 - dehydrogenase, ec:4.99.1.1 - ferrochelatase, ec:2.1.1.11 - protoporphyrin IX methyltransferase,<br/> ec:1.3.1.33 - reductase, ec:5.4.3.8 - 2,1-aminomutase, ec:2.4.1.17 - 1-naphthol glucuronyltransferase, ec:1.3.3.4 - oxidase, ec:1.3.3.3 - oxidase, ec:6.6.1.1 - chelatase, ec:4.4.1.17 - synthase, ec:1.1.1.294 - b reductase, ec:4.2.1.24 - synthase, ec:2.5.1.61 - synthase, ec:1.14.13.122 - oxygenase, ec:6.1.1.17 - ligase</p> | <p>1, 1, 1, 7, 2, 1, 11, 13, 1, 4, 11, 2, 1, 1, 2, 3, 5</p> | <p>vo_c2_Locus_6351_Transcript_1/1_Confidence_0.000_Length_2446, vo_c2_Locus_14123_Transcript_1/1_Confidence_0.000_Length_2014, vo_c1_Locus_10296_Transcript_1/2_Confidence_0.333_Length_535, vo_c1_Locus_19524_Transcript_9/12_Confidence_0.615_Length_3975, vo_c1_Locus_9488_Transcript_3/3_Confidence_0.143_Length_1651, vo_c1_Locus_19524_Transcript_11/12_Confidence_0.231_Length_3997, vo_c2_Locus_859_Transcript_3/4_Confidence_0.125_Length_2424, tri_n_comp33679_c0_seq1, vo_n1_Locus_16962_Transcript_2/2_Confidence_0.000_Length_1641, vo_c2_Locus_9907_Transcript_3/4_Confidence_0.300_Length_2286, vo_n2_Locus_15987_Transcript_6/14_Confidence_0.633_Length_2476, vo_n1_Locus_18944_Transcript_5/7_Confidence_0.308_Length_1755, vo_n2_Locus_2037_Transcript_3/9_Confidence_0.545_Length_1901, vo_c3_Locus_2906_Transcript_6/11_Confidence_0.600_Length_1624, vo_n2_Locus_3814_Transcript_11/17_Confidence_0.455_Length_1871, vo_c2_Locus_1591_Transcript_4/11_Confidence_0.529_Length_1593, vo_c1_Locus_4196_Transcript_6/13_Confidence_0.333_Length_1733, vo_n2_Locus_3814_Transcript_8/17_Confidence_0.485_Length_1854, tri_n_comp11497_c0_seq1, vo_c1_Locus_4196_Transcript_11/13_Confidence_0.167_Length_3524, vo_c3_Locus_2906_Transcript_3/11_Confidence_0.600_Length_1609, vo_n2_Locus_3814_Transcript_12/17_Confidence_0.424_Length_3305, vo_c2_Locus_1591_Transcript_3/11_Confidence_0.588_Length_1821, vo_c2_Locus_1591_Transcript_11/11_Confidence_0.176_Length_1763, tri_c_comp6209_c0_seq1, vo_c1_Locus_26340_Transcript_5/9_Confidence_0.600_Length_1699, tri_n_comp65990_c0_seq1, vo_n1_Locus_13372_Transcript_1/2_Confidence_0.333_Length_1687, vo_n2_Locus_34154_Transcript_3/3_Confidence_0.000_Length_2043, vo_n2_Locus_668_Transcript_17/17_Confidence_0.070_Length_2403, tri_c_comp58135_c0_seq1, vo_c3_Locus_16093_Transcript_1/1_Confidence_0.000_Length_1750, vo_n1_Locus_13372_Transcript_2/2_Confidence_0.000_Length_1314, vo_c2_Locus_24841_Transcript_3/3_Confidence_0.167_Length_3241, vo_n2_Locus_4774_Transcript_1/1_Confidence_0.000_Length_884, vo_c1_Locus_35615_Transcript_1/1_Confidence_0.000_Length_2075, vo_n1_Locus_15639_Transcript_1/1_Confidence_0.000_Length_1086, vo_c1_Locus_11209_Transcript_1/1_Confidence_0.000_Length_1909, vo_c1_Locus_31905_Transcript_2/2_Confidence_0.000_Length_1664, vo_n2_Locus_30478_Transcript_3/5_Confidence_0.455_Length_1623, tri_n_comp21857_c0_seq1, vo_n3_Locus_12576_Transcript_2/2_Confidence_0.250_Length_1541, tri_c_comp22421_c0_seq1, vo_n1_Locus_5081_Transcript_2/2_Confidence_0.000_Length_1015, tri_n_comp19825_c0_seq2, vo_c1_Locus_2134_Transcript_19/32_Confidence_0.509_Length_4654, vo_c2_Locus_1956_Transcript_2/3_Confidence_0.200_Length_861, vo_n1_Locus_5020_Transcript_1/33_Confidence_0.018_Length_238, tri_c_comp59880_c0_seq1, vo_c3_Locus_17678_Transcript_1/2_Confidence_0.667_Length_1546, vo_n3_Locus_3787_Transcript_3/6_Confidence_0.462_Length_2514, vo_c1_Locus_21235_Transcript_2/4_Confidence_0.625_Length_1588, vo_c1_Locus_2134_Transcript_1/32_Confidence_0.019_Length_215, vo_n2_Locus_3_Transcript_126/24291_Confidence_0.000_Length_867, vo_n2_Locus_3_Transcript_123/24291_Confidence_0.000_Length_923, vo_c3_Locus_371_Transcript_5/5_Confidence_0.000_Length_569, vo_c3_Locus_14534_Transcript_1/1_Confidence_0.000_Length_1548, vo_n2_Locus_5339_Transcript_1/2_Confidence_0.800_Length_1469, tri_c_comp65020_c0_seq1, tri_c_comp23477_c0_seq1, vo_c2_Locus_19685_Transcript_3/3_Confidence_0.000_Length_1955, vo_n1_Locus_28213_Transcript_1/1_Confidence_0.000_Length_2019, tri_n_comp17763_c0_seq2, tri_n_comp33248_c0_seq1, vo_n1_Locus_24951_Transcript_1/2_Confidence_0.750_Length_1980, vo_n1_Locus_24951_Transcript_2/2_Confidence_0.000_Length_2025, vo_n3_Locus_8238_Transcript_3/4_Confidence_0.750_Length_2102</p> |
|---------------------------------------------|-----------------|-----------|---------------------------------------------------------------------------------------------------------------------------------------------------------------------------------------------------------------------------------------------------------------------------------------------------------------------------------------------------------------------------------------------------------------------------------------------------------------------------------------------------------------------------|-------------------------------------------------------------|----------------------------------------------------------------------------------------------------------------------------------------------------------------------------------------------------------------------------------------------------------------------------------------------------------------------------------------------------------------------------------------------------------------------------------------------------------------------------------------------------------------------------------------------------------------------------------------------------------------------------------------------------------------------------------------------------------------------------------------------------------------------------------------------------------------------------------------------------------------------------------------------------------------------------------------------------------------------------------------------------------------------------------------------------------------------------------------------------------------------------------------------------------------------------------------------------------------------------------------------------------------------------------------------------------------------------------------------------------------------------------------------------------------------------------------------------------------------------------------------------------------------------------------------------------------------------------------------------------------------------------------------------------------------------------------------------------------------------------------------------------------------------------------------------------------------------------------------------------------------------------------------------------------------------------------------------------------------------------------------------------------------------------------------------------------------------------------------------------------------------------------------------------------------------------------------------------------------------------------------------------------------------------------------------------------------------------------------------------------------------------------------------------------------------------------------------------------------------------------------------------------------------------------------------------------------------------------------------------------------------------------------------------------------------------------------------------------------------------------------------------------------------------------------------------------------------------------------------------------------------------------------------------------------------------------------------------------------------------------------------------------------------------------------------------------------------------------------------------------------------------------------------------------------------------------------------------------------------------------------------------------------------------------------------------------------------------------------------------------------------------------------------------------------------------------------------------------------------------------------------------------------------------------------------------------------------------------------------------------------------------------------------------------------------------------------------------------------------------------------------------------------------------------------------------------------------------------------------------------------------|



|                                 |          |    |                                                                                                                                                                                                                                                                                                                                                                                                                                                                                                                                                                                                                                                                                                                     |                                                   |                                                                                                                                                                                                                                                                                                                                                                                                                                                                                                                                                                                                                                                                                                                                                                                                                                                                                                                                                                                                                                                                                                                                                                                                                                                                                                                                                                                                                                                                                                                                                                                                                                                     |
|---------------------------------|----------|----|---------------------------------------------------------------------------------------------------------------------------------------------------------------------------------------------------------------------------------------------------------------------------------------------------------------------------------------------------------------------------------------------------------------------------------------------------------------------------------------------------------------------------------------------------------------------------------------------------------------------------------------------------------------------------------------------------------------------|---------------------------------------------------|-----------------------------------------------------------------------------------------------------------------------------------------------------------------------------------------------------------------------------------------------------------------------------------------------------------------------------------------------------------------------------------------------------------------------------------------------------------------------------------------------------------------------------------------------------------------------------------------------------------------------------------------------------------------------------------------------------------------------------------------------------------------------------------------------------------------------------------------------------------------------------------------------------------------------------------------------------------------------------------------------------------------------------------------------------------------------------------------------------------------------------------------------------------------------------------------------------------------------------------------------------------------------------------------------------------------------------------------------------------------------------------------------------------------------------------------------------------------------------------------------------------------------------------------------------------------------------------------------------------------------------------------------------|
| Terpenoid backbone biosynthesis | map00900 | 17 | <p>ec:2.7.4.2 - kinase,<br/> ec:1.17.7.1 - synthase (ferredoxin), ec:2.2.1.7 - synthase, ec:2.5.1.10 - diphosphate synthase, ec:2.5.1.29 - diphosphate synthase, ec:2.7.1.148 - 5'-diphospho)-2-C-methyl-D-erythritol kinase, ec:2.5.1.1 - geranyl-diphosphate synthase, ec:4.6.1.12 - 2,4-cyclodiphosphate synthase, ec:2.7.7.60 - 4-phosphate cytidyltransferase, ec:5.3.3.2 - Delta-isomerase, ec:2.3.1.9 - C-acetyltransferase, ec:2.3.3.10 - synthase, ec:1.1.1.267 - reductoisomerase, ec:2.5.1.85 - diphosphate synthase [geranylgeranyl-diphosphate specific], ec:2.5.1.84 - diphosphate synthase [geranyl-diphosphate specific], ec:2.1.1.100 - O-methyltransferase, ec:2.5.1.58 - farnesyltransferase</p> | 1, 2, 1, 1, 1, 1, 4, 1, 1, 1, 2, 4, 1, 3, 3, 2, 1 | <p>vo_n2_Locus_13158_Transcript_1/2_Confidence_1.000_Length_1003, tri_n_comp20539_c0_seq1, vo_n2_Locus_2098_Transcript_8/8_Confidence_0.130_Length_2485, vo_c1_Locus_12331_Transcript_1/1_Confidence_0.000_Length_2548, tri_c_comp29205_c0_seq1, tri_c_comp29205_c0_seq1, vo_c2_Locus_14475_Transcript_1/1_Confidence_0.000_Length_1444, tri_c_comp29205_c0_seq1, vo_n2_Locus_26426_Transcript_1/1_Confidence_0.000_Length_3133, tri_c_comp37590_c0_seq1, vo_n2_Locus_15100_Transcript_1/9_Confidence_0.417_Length_1002, tri_n_comp46466_c0_seq1, vo_c3_Locus_22219_Transcript_1/1_Confidence_0.000_Length_1123, tri_c_comp43842_c0_seq1, vo_c1_Locus_2657_Transcript_1/1_Confidence_0.000_Length_1513, vo_n2_Locus_23058_Transcript_1/1_Confidence_0.000_Length_1342, vo_n2_Locus_634_Transcript_4/6_Confidence_0.357_Length_8557, tri_c_comp57035_c0_seq1, vo_c1_Locus_1809_Transcript_1/1_Confidence_0.000_Length_3087, vo_c3_Locus_18718_Transcript_1/1_Confidence_0.000_Length_2686, vo_n3_Locus_12427_Transcript_1/2_Confidence_1.000_Length_1739, vo_n2_Locus_15100_Transcript_1/9_Confidence_0.417_Length_1002, vo_n2_Locus_15100_Transcript_8/9_Confidence_0.500_Length_2909, vo_n2_Locus_26426_Transcript_1/1_Confidence_0.000_Length_3133, vo_n2_Locus_15100_Transcript_1/9_Confidence_0.417_Length_1002, vo_n2_Locus_15100_Transcript_8/9_Confidence_0.500_Length_2909, vo_n2_Locus_26426_Transcript_1/1_Confidence_0.000_Length_3133, vo_n3_Locus_17871_Transcript_5/5_Confidence_0.417_Length_1328, vo_c2_Locus_15058_Transcript_3/14_Confidence_0.343_Length_2024, vo_c1_Locus_13009_Transcript_1/1_Confidence_0.000_Length_1250</p> |
|---------------------------------|----------|----|---------------------------------------------------------------------------------------------------------------------------------------------------------------------------------------------------------------------------------------------------------------------------------------------------------------------------------------------------------------------------------------------------------------------------------------------------------------------------------------------------------------------------------------------------------------------------------------------------------------------------------------------------------------------------------------------------------------------|---------------------------------------------------|-----------------------------------------------------------------------------------------------------------------------------------------------------------------------------------------------------------------------------------------------------------------------------------------------------------------------------------------------------------------------------------------------------------------------------------------------------------------------------------------------------------------------------------------------------------------------------------------------------------------------------------------------------------------------------------------------------------------------------------------------------------------------------------------------------------------------------------------------------------------------------------------------------------------------------------------------------------------------------------------------------------------------------------------------------------------------------------------------------------------------------------------------------------------------------------------------------------------------------------------------------------------------------------------------------------------------------------------------------------------------------------------------------------------------------------------------------------------------------------------------------------------------------------------------------------------------------------------------------------------------------------------------------|

|                                         |          |    |                                                                                                                                                                                                                                                                                                                                                                                                                                                             |                                                               |                                                                                                                                                                                                                                                                                                                                                                                                                                                                                                                                                                                                                                                                                                                                                                                                                                                                                                                                                                                                                                                                                                                                                                                                                                                                                                                                                                                                                                                                                                                                                                                                                                                                                                                                                                                                                                                                                                                                                                                                                                                                                                                                                                                                                                                                                                                                                                                                                                                                                                                                                                                                                                                                                                                                                                                                                                                                                                                                                                                                                                                                                                                                                                                                                                                                                                                                                                                                                                                                                                                                                                                                                                                                                                                                                                                                                                                                                                                                                                                                                                                                                                                                                                                                                                                                                                                                                                                                                                                                                                                                                                                                                                                                                                                                                                                                                                                                                                                                                                                                                                                                                                                                                                                                                                                                                                                                                                                                                                                                                                                                                                                                                                                                                                                                                                                                                                                                                                                                                                                                                                                                                                                                                                                                                                                                                                                                                                                                                                                                                                                                                                                                                                                                                                                                                                                                                                                                                                                                                                                                                                                                                                                                                                |
|-----------------------------------------|----------|----|-------------------------------------------------------------------------------------------------------------------------------------------------------------------------------------------------------------------------------------------------------------------------------------------------------------------------------------------------------------------------------------------------------------------------------------------------------------|---------------------------------------------------------------|----------------------------------------------------------------------------------------------------------------------------------------------------------------------------------------------------------------------------------------------------------------------------------------------------------------------------------------------------------------------------------------------------------------------------------------------------------------------------------------------------------------------------------------------------------------------------------------------------------------------------------------------------------------------------------------------------------------------------------------------------------------------------------------------------------------------------------------------------------------------------------------------------------------------------------------------------------------------------------------------------------------------------------------------------------------------------------------------------------------------------------------------------------------------------------------------------------------------------------------------------------------------------------------------------------------------------------------------------------------------------------------------------------------------------------------------------------------------------------------------------------------------------------------------------------------------------------------------------------------------------------------------------------------------------------------------------------------------------------------------------------------------------------------------------------------------------------------------------------------------------------------------------------------------------------------------------------------------------------------------------------------------------------------------------------------------------------------------------------------------------------------------------------------------------------------------------------------------------------------------------------------------------------------------------------------------------------------------------------------------------------------------------------------------------------------------------------------------------------------------------------------------------------------------------------------------------------------------------------------------------------------------------------------------------------------------------------------------------------------------------------------------------------------------------------------------------------------------------------------------------------------------------------------------------------------------------------------------------------------------------------------------------------------------------------------------------------------------------------------------------------------------------------------------------------------------------------------------------------------------------------------------------------------------------------------------------------------------------------------------------------------------------------------------------------------------------------------------------------------------------------------------------------------------------------------------------------------------------------------------------------------------------------------------------------------------------------------------------------------------------------------------------------------------------------------------------------------------------------------------------------------------------------------------------------------------------------------------------------------------------------------------------------------------------------------------------------------------------------------------------------------------------------------------------------------------------------------------------------------------------------------------------------------------------------------------------------------------------------------------------------------------------------------------------------------------------------------------------------------------------------------------------------------------------------------------------------------------------------------------------------------------------------------------------------------------------------------------------------------------------------------------------------------------------------------------------------------------------------------------------------------------------------------------------------------------------------------------------------------------------------------------------------------------------------------------------------------------------------------------------------------------------------------------------------------------------------------------------------------------------------------------------------------------------------------------------------------------------------------------------------------------------------------------------------------------------------------------------------------------------------------------------------------------------------------------------------------------------------------------------------------------------------------------------------------------------------------------------------------------------------------------------------------------------------------------------------------------------------------------------------------------------------------------------------------------------------------------------------------------------------------------------------------------------------------------------------------------------------------------------------------------------------------------------------------------------------------------------------------------------------------------------------------------------------------------------------------------------------------------------------------------------------------------------------------------------------------------------------------------------------------------------------------------------------------------------------------------------------------------------------------------------------------------------------------------------------------------------------------------------------------------------------------------------------------------------------------------------------------------------------------------------------------------------------------------------------------------------------------------------------------------------------------------------------------------------------------------------------------------------------------------------------------|
| Glyoxylate and dicarboxylate metabolism | map00630 | 16 | <p>ec:4.1.1.39 - carboxylase, ec:6.3.1.2 - synthetase, ec:4.1.3.24 - lyase, ec:6.2.1.8 - ligase, ec:1.4.7.1 - synthase (ferredoxin), ec:2.3.1.9 - C-acetyltransferase, ec:1.2.3.4 - oxidase, ec:2.3.3.1 - (Si)-synthase, ec:3.5.1.9 - kynurenine formamidase, ec:2.1.2.1 - hydroxymethyltransferase, ec:4.2.1.3 - hydratase, ec:4.1.3.1 - lyase, ec:3.1.3.18 - phosphatase, ec:1.1.3.15 - oxidase, ec:1.1.1.37 - dehydrogenase, ec:1.1.1.36 - reductase</p> | <p>95, 15, 15, 1, 12, 2, 1, 11, 2, 9, 8, 30, 4, 11, 24, 1</p> | <p>vo_c1_Locus_1636_Transcript_17/122_Confidence_0.157_Length_2013, vo_n3_Locus_37_Transcript_16/46_Confidence_0.281_Length_1685, vo_n2_Locus_3_Transcript_22527/24291_Confidence_0.000_Length_1609, vo_n3_Locus_37_Transcript_10/46_Confidence_0.207_Length_1727, vo_n3_Locus_37_Transcript_9/46_Confidence_0.215_Length_1812, vo_c1_Locus_1636_Transcript_122/122_Confidence_0.108_Length_2335, vo_n2_Locus_3_Transcript_22541/24291_Confidence_0.000_Length_288, vo_n2_Locus_3_Transcript_22550/24291_Confidence_0.000_Length_1791, vo_n3_Locus_37_Transcript_33/46_Confidence_0.163_Length_732, vo_n2_Locus_3_Transcript_22526/24291_Confidence_0.000_Length_620, vo_n2_Locus_3_Transcript_22511/24291_Confidence_0.000_Length_798, vo_c1_Locus_1636_Transcript_15/122_Confidence_0.065_Length_512, vo_c2_Locus_52_Transcript_144/466_Confidence_0.025_Length_2131, tri_n_comp20144_c0_seq14, vo_c2_Locus_52_Transcript_133/466_Confidence_0.023_Length_2364, tri_n_comp20144_c0_seq13, vo_n3_Locus_41731_Transcript_1/1_Confidence_0.500_Length_459, vo_c2_Locus_52_Transcript_132/466_Confidence_0.016_Length_1024, vo_n1_Locus_55_Transcript_52/66_Confidence_0.069_Length_313, tri_c_comp20343_c0_seq9, tri_n_comp20144_c0_seq10, tri_n_comp20144_c0_seq7, tri_n_comp20144_c0_seq6, vo_c3_Locus_31_Transcript_6/79_Confidence_0.152_Length_709, tri_n_comp20144_c0_seq3, tri_n_comp20144_c0_seq4, tri_n_comp20144_c0_seq1, vo_c1_Locus_1636_Transcript_86/122_Confidence_0.182_Length_2244, vo_c1_Locus_1636_Transcript_73/122_Confidence_0.222_Length_1747, vo_c2_Locus_52_Transcript_164/466_Confidence_0.011_Length_2810, vo_n2_Locus_3_Transcript_22535/24291_Confidence_0.000_Length_656, vo_n2_Locus_3_Transcript_22546/24291_Confidence_0.000_Length_1498, vo_c3_Locus_31_Transcript_74/79_Confidence_0.124_Length_2769, vo_c3_Locus_31_Transcript_68/79_Confidence_0.124_Length_1224, vo_n3_Locus_37_Transcript_21/46_Confidence_0.148_Length_1139, vo_c3_Locus_31_Transcript_67/79_Confidence_0.152_Length_2229, vo_n3_Locus_37_Transcript_14/46_Confidence_0.259_Length_5942, vo_n1_Locus_55_Transcript_3/66_Confidence_0.063_Length_450, tri_c_comp20343_c0_seq4, tri_c_comp20343_c0_seq3, vo_n2_Locus_3_Transcript_22566/24291_Confidence_0.000_Length_2168, vo_n2_Locus_3452_Transcript_2/4_Confidence_0.636_Length_263, vo_n2_Locus_3_Transcript_22486/24291_Confidence_0.000_Length_1883, vo_c1_Locus_1636_Transcript_120/122_Confidence_0.135_Length_3625, vo_c2_Locus_52_Transcript_120/466_Confidence_0.009_Length_610, vo_c3_Locus_31_Transcript_13/79_Confidence_0.099_Length_748, vo_c1_Locus_1636_Transcript_69/122_Confidence_0.074_Length_844, vo_n2_Locus_3_Transcript_22520/24291_Confidence_0.000_Length_1452, vo_n2_Locus_3_Transcript_22533/24291_Confidence_0.000_Length_679, vo_n2_Locus_3_Transcript_22537/24291_Confidence_0.000_Length_840, vo_c3_Locus_31_Transcript_63/79_Confidence_0.148_Length_3613, vo_c1_Locus_1636_Transcript_71/122_Confidence_0.055_Length_846, vo_c3_Locus_31_Transcript_77/79_Confidence_0.297_Length_1736, vo_c1_Locus_1636_Transcript_83/122_Confidence_0.191_Length_2430, tri_n_comp20833_c0_seq3, vo_c3_Locus_31_Transcript_75/79_Confidence_0.212_Length_8463, vo_c2_Locus_52_Transcript_153/466_Confidence_0.026_Length_1551, vo_c3_Locus_31_Transcript_3/79_Confidence_0.035_Length_301, vo_n2_Locus_3_Transcript_22489/24291_Confidence_0.000_Length_274, vo_n2_Locus_3_Transcript_22509/24291_Confidence_0.000_Length_800, vo_n3_Locus_37_Transcript_38/46_Confidence_0.163_Length_922, tri_c_comp21288_c0_seq1, vo_c1_Locus_1636_Transcript_88/122_Confidence_0.074_Length_1384, vo_c1_Locus_1636_Transcript_121/122_Confidence_0.018_Length_960, vo_n3_Locus_37_Transcript_5/46_Confidence_0.289_Length_1505, vo_n1_Locus_55_Transcript_33/66_Confidence_0.040_Length_1095, vo_c3_Locus_31_Transcript_65/79_Confidence_0.166_Length_2369, vo_c3_Locus_31_Transcript_73/79_Confidence_0.208_Length_2557, vo_c3_Locus_31_Transcript_9/79_Confidence_0.152_Length_714, vo_c2_Locus_52_Transcript_113/466_Confidence_0.004_Length_590, vo_n2_Locus_3_Transcript_22492/24291_Confidence_0.000_Length_1595, vo_n1_Locus_55_Transcript_54/66_Confidence_0.183_Length_2185, vo_c3_Locus_33_Transcript_2/2_Confidence_0.714_Length_611, vo_c2_Locus_52_Transcript_125/466_Confidence_0.007_Length_559, vo_c2_Locus_52_Transcript_135/466_Confidence_0.025_Length_2711, vo_n1_Locus_55_Transcript_12/66_Confidence_0.331_Length_2232, vo_c1_Locus_1636_Transcript_100/122_Confidence_0.031_Length_685, vo_c2_Locus_52_Transcript_131/466_Confidence_0.023_Length_1964, vo_c3_Locus_31_Transcript_7/79_Confidence_0.184_Length_710, vo_n1_Locus_55_Transcript_39/66_Confidence_0.194_Length_1391, vo_n3_Locus_37_Transcript_28/46_Confidence_0.193_Length_1043, vo_n1_Locus_55_Transcript_41/66_Confidence_0.263_Length_1742, vo_n1_Locus_55_Transcript_38/66_Confidence_0.171_Length_1387, vo_n2_Locus_3_Transcript_22491/24291_Confidence_0.000_Length_1174, vo_n3_Locus_37_Transcript_30/46_Confidence_0.178_Length_1043, vo_n2_Locus_3_Transcript_22503/24291_Confidence_0.000_Length_721, vo_n2_Locus_3_Transcript_22540/24291_Confidence_0.000_Length_271, vo_c2_Locus_52_Transcript_128/466_Confidence_0.003_Length_564, vo_c2_Locus_52_Transcript_162/466_Confidence_0.019_Length_1668, vo_n2_Locus_3_Transcript_22534/24291_Confidence_0.000_Length_449, vo_c1_Locus_1636_Transcript_116/122_Confidence_0.129_Length_3526, vo_c3_Locus_31_Transcript_70/79_Confidence_0.208_Length_1586, vo_n1_Locus_55_Transcript_9/66_Confidence_0.349_Length_2172, vo_c1_Locus_8362_Transcript_4/9_Confidence_0.254_Length_482, vo_n1_Locus_55_Transcript_50/66_Confidence_0.166_Length_2379, vo_c1_Locus_1340_Transcript_12/17_Confidence_0.109_Length_2389, vo_c1_Locus_1340_Transcript_9/17_Confidence_0.172_Length_2429, tri_n_comp11684_c0_seq1, vo_c1_Locus_4136_Transcript_1/2_Confidence_0.967_Length_2259, vo_c2_Locus_6408_Transcript_2/14_Confidence_0.268_Length_1478, vo_n1_Locus_335_Transcript_2/3_Confidence_0.909_Length_2286, vo_c2_Locus_3512_Transcript_3/4_Confidence_0.500_Length_2501, vo_n2_Locus_4820_Transcript_2/3_Confidence_0.545_Length_2376, vo_n3_Locus_2644_Transcript_11/11_Confidence_0.323_Length_2390, vo_n2_Locus_515_Transcript_8/9_Confidence_0.471_Length_3194, vo_n2_Locus_515_Transcript_7/9_Confidence_0.176_Length_2355, vo_c2_Locus_3512_Transcript_2/4_Confidence_0.750_Length_2320, vo_c3_Locus_1501_Transcript_6/9_Confidence_0.203_Length_2420, vo_n2_Locus_5127_Transcript_1/3_Confidence_0.200_Length_1636, vo_n2_Locus_22912_Transcript_1/2_Confidence_0.333_Length_2481, vo_c1_Locus_9668_Transcript_5/11_Confidence_0.391_Length_1245, vo_c2_Locus_3988_Transcript_2/10_Confidence_0.500_Length_1233, vo_n3_Locus_4554_Transcript_5/8_Confidence_0.600_Length_1377, vo_c2_Locus_3988_Transcript_1/10_Confidence_0.607_Length_1361, vo_n1_Locus_2626_Transcript_19/26_Confidence_0.238_Length_3851, vo_c1_Locus_9668_Transcript_4/11_Confidence_0.435_Length_1360, vo_n1_Locus_2626_Transcript_15/26_Confidence_0.262_Length_1311,</p> |
|-----------------------------------------|----------|----|-------------------------------------------------------------------------------------------------------------------------------------------------------------------------------------------------------------------------------------------------------------------------------------------------------------------------------------------------------------------------------------------------------------------------------------------------------------|---------------------------------------------------------------|----------------------------------------------------------------------------------------------------------------------------------------------------------------------------------------------------------------------------------------------------------------------------------------------------------------------------------------------------------------------------------------------------------------------------------------------------------------------------------------------------------------------------------------------------------------------------------------------------------------------------------------------------------------------------------------------------------------------------------------------------------------------------------------------------------------------------------------------------------------------------------------------------------------------------------------------------------------------------------------------------------------------------------------------------------------------------------------------------------------------------------------------------------------------------------------------------------------------------------------------------------------------------------------------------------------------------------------------------------------------------------------------------------------------------------------------------------------------------------------------------------------------------------------------------------------------------------------------------------------------------------------------------------------------------------------------------------------------------------------------------------------------------------------------------------------------------------------------------------------------------------------------------------------------------------------------------------------------------------------------------------------------------------------------------------------------------------------------------------------------------------------------------------------------------------------------------------------------------------------------------------------------------------------------------------------------------------------------------------------------------------------------------------------------------------------------------------------------------------------------------------------------------------------------------------------------------------------------------------------------------------------------------------------------------------------------------------------------------------------------------------------------------------------------------------------------------------------------------------------------------------------------------------------------------------------------------------------------------------------------------------------------------------------------------------------------------------------------------------------------------------------------------------------------------------------------------------------------------------------------------------------------------------------------------------------------------------------------------------------------------------------------------------------------------------------------------------------------------------------------------------------------------------------------------------------------------------------------------------------------------------------------------------------------------------------------------------------------------------------------------------------------------------------------------------------------------------------------------------------------------------------------------------------------------------------------------------------------------------------------------------------------------------------------------------------------------------------------------------------------------------------------------------------------------------------------------------------------------------------------------------------------------------------------------------------------------------------------------------------------------------------------------------------------------------------------------------------------------------------------------------------------------------------------------------------------------------------------------------------------------------------------------------------------------------------------------------------------------------------------------------------------------------------------------------------------------------------------------------------------------------------------------------------------------------------------------------------------------------------------------------------------------------------------------------------------------------------------------------------------------------------------------------------------------------------------------------------------------------------------------------------------------------------------------------------------------------------------------------------------------------------------------------------------------------------------------------------------------------------------------------------------------------------------------------------------------------------------------------------------------------------------------------------------------------------------------------------------------------------------------------------------------------------------------------------------------------------------------------------------------------------------------------------------------------------------------------------------------------------------------------------------------------------------------------------------------------------------------------------------------------------------------------------------------------------------------------------------------------------------------------------------------------------------------------------------------------------------------------------------------------------------------------------------------------------------------------------------------------------------------------------------------------------------------------------------------------------------------------------------------------------------------------------------------------------------------------------------------------------------------------------------------------------------------------------------------------------------------------------------------------------------------------------------------------------------------------------------------------------------------------------------------------------------------------------------------------------------------------------------------------------------------------------|

|  |  |  |  |                                                                                                                                                                                                                                                                                                                                                                                                                                                                                                                                                                                                                                                                                                                                                                                                                                                                                                                                                                                                                                                                                                                                                                                                                                                                                                                                                                                                                                                                                                                                                                                                                                                                                                                                                                                                                                                                                                                                                                                                                                                                                                                                                                                                                                                                                                                                                                                                                                                                                                                                                                                                                                                                                                                                                                                                                                                                                                                                                                                                                                                                                                                                                                                                                                                                                                                                                                                                                                                                                                                                                                                                                                                                                                                                                                                                                                                                                                                                                                                                                                                                                                                                                                                                                                                                                                                                                                                                                                                                                                                                                                                                                                                                                                                                                                                                                                                                                                                                                                                                                                                                                                                                                                                                                                                                                                                                                                                                                                                                                                                                                                                                                                                                                                                                                                                                                                                                                                                                                                                                                                                                                                                                                                                                                                                                                                                                                                                                                                                                                                                                                                                                                                                                                                                                                                                                                                                                                                                                                                                                                                                                                                                                                             |
|--|--|--|--|-------------------------------------------------------------------------------------------------------------------------------------------------------------------------------------------------------------------------------------------------------------------------------------------------------------------------------------------------------------------------------------------------------------------------------------------------------------------------------------------------------------------------------------------------------------------------------------------------------------------------------------------------------------------------------------------------------------------------------------------------------------------------------------------------------------------------------------------------------------------------------------------------------------------------------------------------------------------------------------------------------------------------------------------------------------------------------------------------------------------------------------------------------------------------------------------------------------------------------------------------------------------------------------------------------------------------------------------------------------------------------------------------------------------------------------------------------------------------------------------------------------------------------------------------------------------------------------------------------------------------------------------------------------------------------------------------------------------------------------------------------------------------------------------------------------------------------------------------------------------------------------------------------------------------------------------------------------------------------------------------------------------------------------------------------------------------------------------------------------------------------------------------------------------------------------------------------------------------------------------------------------------------------------------------------------------------------------------------------------------------------------------------------------------------------------------------------------------------------------------------------------------------------------------------------------------------------------------------------------------------------------------------------------------------------------------------------------------------------------------------------------------------------------------------------------------------------------------------------------------------------------------------------------------------------------------------------------------------------------------------------------------------------------------------------------------------------------------------------------------------------------------------------------------------------------------------------------------------------------------------------------------------------------------------------------------------------------------------------------------------------------------------------------------------------------------------------------------------------------------------------------------------------------------------------------------------------------------------------------------------------------------------------------------------------------------------------------------------------------------------------------------------------------------------------------------------------------------------------------------------------------------------------------------------------------------------------------------------------------------------------------------------------------------------------------------------------------------------------------------------------------------------------------------------------------------------------------------------------------------------------------------------------------------------------------------------------------------------------------------------------------------------------------------------------------------------------------------------------------------------------------------------------------------------------------------------------------------------------------------------------------------------------------------------------------------------------------------------------------------------------------------------------------------------------------------------------------------------------------------------------------------------------------------------------------------------------------------------------------------------------------------------------------------------------------------------------------------------------------------------------------------------------------------------------------------------------------------------------------------------------------------------------------------------------------------------------------------------------------------------------------------------------------------------------------------------------------------------------------------------------------------------------------------------------------------------------------------------------------------------------------------------------------------------------------------------------------------------------------------------------------------------------------------------------------------------------------------------------------------------------------------------------------------------------------------------------------------------------------------------------------------------------------------------------------------------------------------------------------------------------------------------------------------------------------------------------------------------------------------------------------------------------------------------------------------------------------------------------------------------------------------------------------------------------------------------------------------------------------------------------------------------------------------------------------------------------------------------------------------------------------------------------------------------------------------------------------------------------------------------------------------------------------------------------------------------------------------------------------------------------------------------------------------------------------------------------------------------------------------------------------------------------------------------------------------------------------------------------------------------------------------------------------|
|  |  |  |  | <p>vo_c1_Locus_9668_Transcript_6/11_Confidence_0.348_Length_1630, vo_n2_Locus_3_Transcript_5064/24291_Confidence_0.000_Length_1233, vo_n3_Locus_4554_Transcript_6/8_Confidence_0.533_Length_1337, vo_c2_Locus_3988_Transcript_5/10_Confidence_0.536_Length_2785, vo_n1_Locus_2626_Transcript_18/26_Confidence_0.310_Length_2079, vo_c2_Locus_3988_Transcript_7/10_Confidence_0.500_Length_1273, vo_n2_Locus_3_Transcript_5069/24291_Confidence_0.000_Length_1240, vo_c2_Locus_3988_Transcript_9/10_Confidence_0.429_Length_1401, vo_n2_Locus_854_Transcript_1/1_Confidence_0.000_Length_1753, vo_c2_Locus_4368_Transcript_2/25_Confidence_0.375_Length_6775, vo_c1_Locus_13166_Transcript_27/32_Confidence_0.394_Length_6627, vo_n2_Locus_3_Transcript_20516/24291_Confidence_0.000_Length_6564, vo_c3_Locus_3082_Transcript_7/7_Confidence_0.167_Length_5439, vo_n1_Locus_991_Transcript_1/21_Confidence_0.113_Length_1473, tri_c_comp19198_c0_seq1, vo_c1_Locus_13166_Transcript_28/32_Confidence_0.409_Length_6630, vo_n1_Locus_7772_Transcript_1/1_Confidence_0.000_Length_6986, tri_c_comp19198_c0_seq4, tri_c_comp19198_c0_seq3, vo_n3_Locus_4402_Transcript_3/18_Confidence_0.269_Length_6798, vo_c3_Locus_3082_Transcript_5/7_Confidence_0.333_Length_2051, vo_c1_Locus_2657_Transcript_1/1_Confidence_0.000_Length_1513, vo_n2_Locus_23058_Transcript_1/1_Confidence_0.000_Length_1342, vo_c2_Locus_4832_Transcript_1/1_Confidence_0.000_Length_1285, vo_c3_Locus_4005_Transcript_5/6_Confidence_0.167_Length_1517, vo_c1_Locus_6811_Transcript_7/8_Confidence_0.364_Length_589, vo_n2_Locus_297_Transcript_2/5_Confidence_0.636_Length_1679, vo_c2_Locus_1080_Transcript_4/21_Confidence_0.241_Length_1741, vo_c2_Locus_1080_Transcript_3/21_Confidence_0.207_Length_1702, vo_n3_Locus_1253_Transcript_1/2_Confidence_0.500_Length_1626, vo_c2_Locus_1080_Transcript_8/21_Confidence_0.138_Length_1077, vo_c2_Locus_4581_Transcript_3/8_Confidence_0.684_Length_1578, vo_n2_Locus_901_Transcript_1/95_Confidence_0.023_Length_1512, vo_n2_Locus_20307_Transcript_6/7_Confidence_0.062_Length_2030, vo_n3_Locus_1253_Transcript_2/2_Confidence_0.000_Length_1587, vo_n2_Locus_10311_Transcript_5/6_Confidence_0.357_Length_778, vo_n2_Locus_10311_Transcript_2/6_Confidence_0.500_Length_1843, vo_c2_Locus_1465_Transcript_1/1_Confidence_0.000_Length_2684, vo_n2_Locus_668_Transcript_12/17_Confidence_0.465_Length_3343, vo_n3_Locus_1281_Transcript_13/14_Confidence_0.467_Length_2089, vo_n2_Locus_668_Transcript_10/17_Confidence_0.419_Length_1865, vo_c3_Locus_6604_Transcript_15/15_Confidence_0.590_Length_1792, vo_n3_Locus_1281_Transcript_3/14_Confidence_0.533_Length_1904, vo_c3_Locus_6604_Transcript_12/15_Confidence_0.230_Length_1729, tri_n_comp22443_c0_seq1, vo_c2_Locus_2191_Transcript_14/17_Confidence_0.464_Length_1841, tri_n_comp15079_c0_seq3, vo_c1_Locus_2380_Transcript_17/17_Confidence_0.086_Length_3951, vo_c2_Locus_191_Transcript_2/2_Confidence_0.167_Length_3106, vo_c1_Locus_2380_Transcript_3/17_Confidence_0.371_Length_12857, tri_c_comp21028_c0_seq2, tri_c_comp21028_c0_seq3, vo_c2_Locus_354_Transcript_3/17_Confidence_0.667_Length_4966, vo_n1_Locus_30469_Transcript_2/2_Confidence_0.000_Length_979, vo_n3_Locus_4489_Transcript_2/3_Confidence_0.444_Length_2229, vo_n1_Locus_1163_Transcript_25/49_Confidence_0.232_Length_2084, vo_n1_Locus_1163_Transcript_5/49_Confidence_0.087_Length_1841, vo_n1_Locus_1163_Transcript_28/49_Confidence_0.319_Length_2335, vo_c2_Locus_352_Transcript_3/4_Confidence_0.889_Length_1920, vo_n1_Locus_1163_Transcript_13/49_Confidence_0.203_Length_2083, vo_n1_Locus_1163_Transcript_18/49_Confidence_0.319_Length_2098, vo_n3_Locus_527_Transcript_24/31_Confidence_0.194_Length_2036, vo_n3_Locus_527_Transcript_17/31_Confidence_0.343_Length_2078, vo_c2_Locus_6197_Transcript_2/4_Confidence_0.143_Length_1400, vo_n2_Locus_3_Transcript_20033/24291_Confidence_0.000_Length_1861, vo_c2_Locus_364_Transcript_15/30_Confidence_0.278_Length_2035, vo_n2_Locus_3_Transcript_20001/24291_Confidence_0.000_Length_2052, vo_c2_Locus_364_Transcript_11/30_Confidence_0.306_Length_2035, vo_c2_Locus_364_Transcript_5/30_Confidence_0.292_Length_2051, vo_c2_Locus_364_Transcript_9/30_Confidence_0.194_Length_2033, vo_c3_Locus_145_Transcript_31/32_Confidence_0.014_Length_533, vo_n1_Locus_1163_Transcript_23/49_Confidence_0.290_Length_2037, vo_n2_Locus_3_Transcript_19989/24291_Confidence_0.000_Length_1977, vo_n2_Locus_3_Transcript_20027/24291_Confidence_0.000_Length_2905, vo_n3_Locus_527_Transcript_18/31_Confidence_0.388_Length_2047, tri_c_comp17405_c0_seq2, tri_c_comp20952_c0_seq1, vo_n1_Locus_1163_Transcript_44/49_Confidence_0.101_Length_1863, vo_n3_Locus_527_Transcript_29/31_Confidence_0.328_Length_2078, vo_c2_Locus_364_Transcript_24/30_Confidence_0.250_Length_1867, vo_n1_Locus_1163_Transcript_10/49_Confidence_0.246_Length_2083, vo_c2_Locus_364_Transcript_17/30_Confidence_0.306_Length_2052, vo_n3_Locus_527_Transcript_6/31_Confidence_0.313_Length_2013, vo_n2_Locus_3_Transcript_20024/24291_Confidence_0.000_Length_2008, vo_c3_Locus_4822_Transcript_1/2_Confidence_0.714_Length_1522, vo_c1_Locus_1081_Transcript_12/28_Confidence_0.279_Length_1129, vo_n1_Locus_10488_Transcript_5/10_Confidence_0.438_Length_1440, tri_n_comp11728_c0_seq1, vo_c2_Locus_2688_Transcript_17/23_Confidence_0.279_Length_1682, vo_c1_Locus_4014_Transcript_24/28_Confidence_0.138_Length_2429, vo_c1_Locus_4014_Transcript_20/28_Confidence_0.117_Length_1747, vo_c1_Locus_4014_Transcript_28/28_Confidence_0.085_Length_1888, vo_c1_Locus_4014_Transcript_6/28_Confidence_0.404_Length_1911, tri_n_comp77429_c0_seq1, vo_n1_Locus_14_Transcript_1/27_Confidence_0.261_Length_1848, tri_n_comp20167_c0_seq2, vo_n3_Locus_4343_Transcript_9/16_Confidence_0.200_Length_1729, vo_c3_Locus_10348_Transcript_1/2_Confidence_0.875_Length_1734, vo_c1_Locus_4014_Transcript_12/28_Confidence_0.245_Length_1582, vo_c3_Locus_1723_Transcript_29/37_Confidence_0.411_Length_1695, vo_n2_Locus_330_Transcript_25/38_Confidence_0.361_Length_1516, vo_c3_Locus_1723_Transcript_35/37_Confidence_0.464_Length_1702, vo_c1_Locus_15206_Transcript_3/3_Confidence_0.000_Length_1312, vo_c1_Locus_7371_Transcript_4/4_Confidence_0.600_Length_1352, vo_c3_Locus_1723_Transcript_37/37_Confidence_0.214_Length_1530, vo_n1_Locus_769_Transcript_28/41_Confidence_0.400_Length_1609, vo_n1_Locus_769_Transcript_9/41_Confidence_0.460_Length_1494, vo_c3_Locus_2965_Transcript_2/2_Confidence_0.250_Length_1327, vo_n2_Locus_330_Transcript_5/38_Confidence_0.328_Length_11715, vo_n1_Locus_9772_Transcript_1/2_Confidence_0.333_Length_1224, vo_c1_Locus_3603_Transcript_44/48_Confidence_0.492_Length_1696, vo_c2_Locus_4242_Transcript_2/3_Confidence_0.400_Length_1168, vo_n1_Locus_6649_Transcript_2/3_Confidence_0.500_Length_2124, vo_c1_Locus_7371_Transcript_1/4_Confidence_0.500_Length_1352, vo_n3_Locus_2381_Transcript_2/3_Confidence_0.500_Length_1330, vo_c3_Locus_1723_Transcript_16/37_Confidence_0.286_Length_1491,</p> |
|--|--|--|--|-------------------------------------------------------------------------------------------------------------------------------------------------------------------------------------------------------------------------------------------------------------------------------------------------------------------------------------------------------------------------------------------------------------------------------------------------------------------------------------------------------------------------------------------------------------------------------------------------------------------------------------------------------------------------------------------------------------------------------------------------------------------------------------------------------------------------------------------------------------------------------------------------------------------------------------------------------------------------------------------------------------------------------------------------------------------------------------------------------------------------------------------------------------------------------------------------------------------------------------------------------------------------------------------------------------------------------------------------------------------------------------------------------------------------------------------------------------------------------------------------------------------------------------------------------------------------------------------------------------------------------------------------------------------------------------------------------------------------------------------------------------------------------------------------------------------------------------------------------------------------------------------------------------------------------------------------------------------------------------------------------------------------------------------------------------------------------------------------------------------------------------------------------------------------------------------------------------------------------------------------------------------------------------------------------------------------------------------------------------------------------------------------------------------------------------------------------------------------------------------------------------------------------------------------------------------------------------------------------------------------------------------------------------------------------------------------------------------------------------------------------------------------------------------------------------------------------------------------------------------------------------------------------------------------------------------------------------------------------------------------------------------------------------------------------------------------------------------------------------------------------------------------------------------------------------------------------------------------------------------------------------------------------------------------------------------------------------------------------------------------------------------------------------------------------------------------------------------------------------------------------------------------------------------------------------------------------------------------------------------------------------------------------------------------------------------------------------------------------------------------------------------------------------------------------------------------------------------------------------------------------------------------------------------------------------------------------------------------------------------------------------------------------------------------------------------------------------------------------------------------------------------------------------------------------------------------------------------------------------------------------------------------------------------------------------------------------------------------------------------------------------------------------------------------------------------------------------------------------------------------------------------------------------------------------------------------------------------------------------------------------------------------------------------------------------------------------------------------------------------------------------------------------------------------------------------------------------------------------------------------------------------------------------------------------------------------------------------------------------------------------------------------------------------------------------------------------------------------------------------------------------------------------------------------------------------------------------------------------------------------------------------------------------------------------------------------------------------------------------------------------------------------------------------------------------------------------------------------------------------------------------------------------------------------------------------------------------------------------------------------------------------------------------------------------------------------------------------------------------------------------------------------------------------------------------------------------------------------------------------------------------------------------------------------------------------------------------------------------------------------------------------------------------------------------------------------------------------------------------------------------------------------------------------------------------------------------------------------------------------------------------------------------------------------------------------------------------------------------------------------------------------------------------------------------------------------------------------------------------------------------------------------------------------------------------------------------------------------------------------------------------------------------------------------------------------------------------------------------------------------------------------------------------------------------------------------------------------------------------------------------------------------------------------------------------------------------------------------------------------------------------------------------------------------------------------------------------------------------------------------------------------------------------|

|  |  |  |  |  |                                                                                                                                                                                                                                                                                                                                                                                                                                                                                 |
|--|--|--|--|--|---------------------------------------------------------------------------------------------------------------------------------------------------------------------------------------------------------------------------------------------------------------------------------------------------------------------------------------------------------------------------------------------------------------------------------------------------------------------------------|
|  |  |  |  |  | vo_n1_Locus_769_Transcript_36/41_Confidence_0.420_Length_1536, vo_n1_Locus_769_Transcript_40/41_Confidence_0.320_Length_1479, vo_n1_Locus_6649_Transcript_1/3_Confidence_0.750_Length_1883, vo_c1_Locus_3603_Transcript_26/48_Confidence_0.400_Length_1432, vo_n1_Locus_5348_Transcript_2/2_Confidence_0.200_Length_1608, vo_n3_Locus_3383_Transcript_35/37_Confidence_0.389_Length_1512, tri_c_comp20802_c0_seq1, vo_c1_Locus_2815_Transcript_3/4_Confidence_0.200_Length_2244 |
|--|--|--|--|--|---------------------------------------------------------------------------------------------------------------------------------------------------------------------------------------------------------------------------------------------------------------------------------------------------------------------------------------------------------------------------------------------------------------------------------------------------------------------------------|

|                                            |          |    |                                                                                                                                                                                                                                                                                                                                                                                                                                                                                                                                          |                                                        |                                                                                                                                                                                                                                                                                                                                                                                                                                                                                                                                                                                                                                                                                                                                                                                                                                                                                                                                                                                                                                                                                                                                                                                                                                                                                                                                                                                                                                                                                                                                                                                                                                                                                                                                                                                                                                                                                                                                                                                                                                                                                                                                                                                                                                                                                                                                                                                                                                                                                                                                                                                                                                                                                                                                                                                                                                                                                                                                                                                                                                                                                                                                                                                                                                                                                                                                                                                                                                                        |
|--------------------------------------------|----------|----|------------------------------------------------------------------------------------------------------------------------------------------------------------------------------------------------------------------------------------------------------------------------------------------------------------------------------------------------------------------------------------------------------------------------------------------------------------------------------------------------------------------------------------------|--------------------------------------------------------|--------------------------------------------------------------------------------------------------------------------------------------------------------------------------------------------------------------------------------------------------------------------------------------------------------------------------------------------------------------------------------------------------------------------------------------------------------------------------------------------------------------------------------------------------------------------------------------------------------------------------------------------------------------------------------------------------------------------------------------------------------------------------------------------------------------------------------------------------------------------------------------------------------------------------------------------------------------------------------------------------------------------------------------------------------------------------------------------------------------------------------------------------------------------------------------------------------------------------------------------------------------------------------------------------------------------------------------------------------------------------------------------------------------------------------------------------------------------------------------------------------------------------------------------------------------------------------------------------------------------------------------------------------------------------------------------------------------------------------------------------------------------------------------------------------------------------------------------------------------------------------------------------------------------------------------------------------------------------------------------------------------------------------------------------------------------------------------------------------------------------------------------------------------------------------------------------------------------------------------------------------------------------------------------------------------------------------------------------------------------------------------------------------------------------------------------------------------------------------------------------------------------------------------------------------------------------------------------------------------------------------------------------------------------------------------------------------------------------------------------------------------------------------------------------------------------------------------------------------------------------------------------------------------------------------------------------------------------------------------------------------------------------------------------------------------------------------------------------------------------------------------------------------------------------------------------------------------------------------------------------------------------------------------------------------------------------------------------------------------------------------------------------------------------------------------------------------|
| Valine, leucine and isoleucine degradation | map00280 | 16 | <p>ec:2.6.1.18 - transaminase, ec:1.2.1.27 - dehydrogenase (CoA-acylating), ec:2.6.1.40 - transaminase, ec:2.6.1.42 - transaminase, ec:1.8.1.4 - dehydrogenase, ec:1.2.1.3 - dehydrogenase (NAD+), ec:2.3.1.9 - C-acetyltransferase, ec:2.3.3.10 - synthase, ec:1.3.99.12 - dehydrogenase, ec:1.3.8.1 - acyl-CoA dehydrogenase, ec:2.8.3.5 - CoA-transferase, ec:3.1.2.4 - hydrolase, ec:4.2.1.17 - hydratase, ec:1.1.1.35 - dehydrogenase, ec:1.1.1.31 - dehydrogenase, ec:1.2.4.4 - dehydrogenase (2-methylpropanoyl-transferring)</p> | <p>1, 3, 1, 6, 2, 5, 2, 4, 1, 2, 1, 1, 7, 16, 5, 1</p> | <p>vo_c1_Locus_7220_Transcript_2/3_Confidence_0.400_Length_2898, vo_c3_Locus_1581_Transcript_3/3_Confidence_0.000_Length_1736, vo_c1_Locus_1298_Transcript_3/6_Confidence_0.625_Length_1775, vo_n2_Locus_157_Transcript_2/4_Confidence_0.286_Length_2059, vo_c1_Locus_7220_Transcript_2/3_Confidence_0.400_Length_2898, vo_c2_Locus_384_Transcript_2/3_Confidence_0.400_Length_1725, tri_c_comp32679_c0_seq1, vo_c1_Locus_10788_Transcript_1/1_Confidence_0.000_Length_1721, vo_c2_Locus_14969_Transcript_4/8_Confidence_0.750_Length_1231, vo_n2_Locus_3786_Transcript_2/4_Confidence_0.778_Length_1466, vo_n2_Locus_3786_Transcript_3/4_Confidence_0.667_Length_1442, vo_n3_Locus_6810_Transcript_2/3_Confidence_0.913_Length_1699, vo_n1_Locus_6460_Transcript_1/1_Confidence_0.000_Length_1912, tri_c_comp55340_c0_seq1, vo_n1_Locus_19864_Transcript_2/2_Confidence_0.000_Length_2707, vo_c3_Locus_21741_Transcript_5/9_Confidence_0.583_Length_1757, vo_n3_Locus_25600_Transcript_5/6_Confidence_0.375_Length_1777, tri_n_comp58061_c0_seq1, vo_c1_Locus_2657_Transcript_1/1_Confidence_0.000_Length_1513, vo_n2_Locus_23058_Transcript_1/1_Confidence_0.000_Length_1342, vo_n2_Locus_634_Transcript_4/6_Confidence_0.357_Length_8557, tri_c_comp57035_c0_seq1, vo_c1_Locus_1809_Transcript_1/1_Confidence_0.000_Length_3087, vo_c3_Locus_18718_Transcript_1/1_Confidence_0.000_Length_2686, vo_c3_Locus_18248_Transcript_1/2_Confidence_0.667_Length_1596, tri_c_comp7217_c0_seq2, vo_c3_Locus_18248_Transcript_1/2_Confidence_0.667_Length_1596, vo_c2_Locus_6864_Transcript_3/5_Confidence_0.667_Length_1701, vo_c3_Locus_6234_Transcript_1/1_Confidence_0.000_Length_1326, vo_c2_Locus_2261_Transcript_1/2_Confidence_1.000_Length_2564, vo_c3_Locus_5948_Transcript_1/1_Confidence_0.000_Length_1027, vo_n2_Locus_16945_Transcript_1/3_Confidence_0.500_Length_1084, vo_c3_Locus_9925_Transcript_8/11_Confidence_0.263_Length_3550, vo_n1_Locus_11137_Transcript_5/5_Confidence_0.143_Length_2829, vo_n2_Locus_16945_Transcript_3/3_Confidence_0.000_Length_746, vo_n2_Locus_30747_Transcript_1/1_Confidence_0.000_Length_951, vo_c2_Locus_2261_Transcript_1/2_Confidence_1.000_Length_2564, vo_n1_Locus_9414_Transcript_8/13_Confidence_0.167_Length_606, vo_c1_Locus_40339_Transcript_1/1_Confidence_0.000_Length_1318, vo_c3_Locus_2031_Transcript_8/8_Confidence_0.111_Length_1389, vo_n1_Locus_11137_Transcript_5/5_Confidence_0.143_Length_2829, vo_c1_Locus_4675_Transcript_3/3_Confidence_0.200_Length_1348, vo_n2_Locus_30747_Transcript_1/1_Confidence_0.000_Length_951, vo_n2_Locus_636_Transcript_13/16_Confidence_0.222_Length_768, vo_c1_Locus_2815_Transcript_3/4_Confidence_0.200_Length_2244, vo_c3_Locus_9925_Transcript_8/11_Confidence_0.263_Length_3550, tri_n_comp42565_c0_seq1, vo_c2_Locus_189_Transcript_29/60_Confidence_0.015_Length_692, vo_n2_Locus_636_Transcript_16/16_Confidence_0.139_Length_616, vo_n2_Locus_636_Transcript_14/16_Confidence_0.222_Length_622, vo_n2_Locus_636_Transcript_5/16_Confidence_0.194_Length_591, vo_n2_Locus_636_Transcript_3/16_Confidence_0.306_Length_685, tri_c_comp25671_c0_seq1, tri_n_comp18543_c0_seq8, vo_c2_Locus_14292_Transcript_1/3_Confidence_0.857_Length_1370, vo_c2_Locus_14292_Transcript_3/3_Confidence_0.429_Length_1343, vo_c2_Locus_13495_Transcript_4/17_Confidence_0.346_Length_1808, vo_c1_Locus_5714_Transcript_2/3_Confidence_0.714_Length_2588</p> |
|--------------------------------------------|----------|----|------------------------------------------------------------------------------------------------------------------------------------------------------------------------------------------------------------------------------------------------------------------------------------------------------------------------------------------------------------------------------------------------------------------------------------------------------------------------------------------------------------------------------------------|--------------------------------------------------------|--------------------------------------------------------------------------------------------------------------------------------------------------------------------------------------------------------------------------------------------------------------------------------------------------------------------------------------------------------------------------------------------------------------------------------------------------------------------------------------------------------------------------------------------------------------------------------------------------------------------------------------------------------------------------------------------------------------------------------------------------------------------------------------------------------------------------------------------------------------------------------------------------------------------------------------------------------------------------------------------------------------------------------------------------------------------------------------------------------------------------------------------------------------------------------------------------------------------------------------------------------------------------------------------------------------------------------------------------------------------------------------------------------------------------------------------------------------------------------------------------------------------------------------------------------------------------------------------------------------------------------------------------------------------------------------------------------------------------------------------------------------------------------------------------------------------------------------------------------------------------------------------------------------------------------------------------------------------------------------------------------------------------------------------------------------------------------------------------------------------------------------------------------------------------------------------------------------------------------------------------------------------------------------------------------------------------------------------------------------------------------------------------------------------------------------------------------------------------------------------------------------------------------------------------------------------------------------------------------------------------------------------------------------------------------------------------------------------------------------------------------------------------------------------------------------------------------------------------------------------------------------------------------------------------------------------------------------------------------------------------------------------------------------------------------------------------------------------------------------------------------------------------------------------------------------------------------------------------------------------------------------------------------------------------------------------------------------------------------------------------------------------------------------------------------------------------------|

|                                 |          |    |                                                                                                                                                                                                                                                                                                                                                                                                                                                                                                              |                                                 |                                                                                                                                                                                                                                                                                                                                                                                                                                                                                                                                                                                                                                                                                                                                                                                                                                                                                                                                                                                                                                                                                                                                                                                                                                                                                                                                                                                                                                                                                                                                                                                                                                                                                                                                                                                                                                                                                                                                                                                                                                                                                                                                                                                                                                                                                                                                                                                                                                                                                                                                                                                                                                                                                                                                                                                                                                                                                                                                                                                                                                                                                                                                                                                                                                                                                                                                                                                                                                                                                                                                                                                                                                                                                                                                                                                                                                                                                                                                                                                                                                                                                                                                                                                                                                                                                                                                                                                                                                                                                                                                                                                                                                                                                                                                                                                                                                                                                                                                                                                                                                                                                                                                                                                                                                                                                                                                                                                                                                                                                                                                                                                                                                                                                                            |
|---------------------------------|----------|----|--------------------------------------------------------------------------------------------------------------------------------------------------------------------------------------------------------------------------------------------------------------------------------------------------------------------------------------------------------------------------------------------------------------------------------------------------------------------------------------------------------------|-------------------------------------------------|------------------------------------------------------------------------------------------------------------------------------------------------------------------------------------------------------------------------------------------------------------------------------------------------------------------------------------------------------------------------------------------------------------------------------------------------------------------------------------------------------------------------------------------------------------------------------------------------------------------------------------------------------------------------------------------------------------------------------------------------------------------------------------------------------------------------------------------------------------------------------------------------------------------------------------------------------------------------------------------------------------------------------------------------------------------------------------------------------------------------------------------------------------------------------------------------------------------------------------------------------------------------------------------------------------------------------------------------------------------------------------------------------------------------------------------------------------------------------------------------------------------------------------------------------------------------------------------------------------------------------------------------------------------------------------------------------------------------------------------------------------------------------------------------------------------------------------------------------------------------------------------------------------------------------------------------------------------------------------------------------------------------------------------------------------------------------------------------------------------------------------------------------------------------------------------------------------------------------------------------------------------------------------------------------------------------------------------------------------------------------------------------------------------------------------------------------------------------------------------------------------------------------------------------------------------------------------------------------------------------------------------------------------------------------------------------------------------------------------------------------------------------------------------------------------------------------------------------------------------------------------------------------------------------------------------------------------------------------------------------------------------------------------------------------------------------------------------------------------------------------------------------------------------------------------------------------------------------------------------------------------------------------------------------------------------------------------------------------------------------------------------------------------------------------------------------------------------------------------------------------------------------------------------------------------------------------------------------------------------------------------------------------------------------------------------------------------------------------------------------------------------------------------------------------------------------------------------------------------------------------------------------------------------------------------------------------------------------------------------------------------------------------------------------------------------------------------------------------------------------------------------------------------------------------------------------------------------------------------------------------------------------------------------------------------------------------------------------------------------------------------------------------------------------------------------------------------------------------------------------------------------------------------------------------------------------------------------------------------------------------------------------------------------------------------------------------------------------------------------------------------------------------------------------------------------------------------------------------------------------------------------------------------------------------------------------------------------------------------------------------------------------------------------------------------------------------------------------------------------------------------------------------------------------------------------------------------------------------------------------------------------------------------------------------------------------------------------------------------------------------------------------------------------------------------------------------------------------------------------------------------------------------------------------------------------------------------------------------------------------------------------------------------------------------------------------------------|
| Fructose and mannose metabolism | map00051 | 16 | <p>ec:1.1.1.187 - reductase,<br/> ec:2.7.1.105 - phosphofructokinase 2,<br/> ec:2.7.1.90 - 1-phosphotransferase,<br/> ec:2.7.1.11 - phosphohexokinase,<br/> ec:5.3.1.1 - isomerase,<br/> ec:5.3.1.6 - isomerase,<br/> ec:4.1.2.13 - aldolase,<br/> ec:3.1.3.46 - 2-phosphatase,<br/> ec:3.1.3.11 - hexose diphosphatase, ec:3.6.1.21 - diphosphatase, ec:1.1.1.271 - synthase, ec:4.2.1.47 - 4,6-dehydratase, ec:1.1.1.67 - 2-dehydrogenase, ec:1.1.1.14 - 2-dehydrogenase,<br/> ec:1.1.1.21 - reductase</p> | 1, 5, 1, 5, 9, 2, 2, 38, 6, 8, 5, 1, 3, 1, 3, 4 | <p>vo_c2_Locus_4832_Transcript_1/1_Confidence_0.000_Length_1285, vo_c3_Locus_21070_Transcript_1/1_Confidence_0.000_Length_1698, vo_c3_Locus_6327_Transcript_1/2_Confidence_0.750_Length_2258, tri_c_comp28824_c0_seq1, vo_n1_Locus_11871_Transcript_1/1_Confidence_0.000_Length_1701, vo_c3_Locus_6327_Transcript_2/2_Confidence_0.250_Length_2279, vo_c2_Locus_6348_Transcript_1/2_Confidence_1.000_Length_3755, vo_c3_Locus_1613_Transcript_6/17_Confidence_0.158_Length_5809, vo_n1_Locus_10193_Transcript_1/1_Confidence_0.000_Length_1647, vo_c2_Locus_6348_Transcript_1/2_Confidence_1.000_Length_3755, vo_n3_Locus_23556_Transcript_2/4_Confidence_0.500_Length_4210, tri_c_comp43537_c0_seq1, vo_c2_Locus_3634_Transcript_8/8_Confidence_0.133_Length_2428, vo_c2_Locus_324_Transcript_5/12_Confidence_0.333_Length_1009, vo_n1_Locus_5721_Transcript_6/9_Confidence_0.389_Length_989, vo_c2_Locus_324_Transcript_11/12_Confidence_0.333_Length_4393, vo_n2_Locus_475_Transcript_7/13_Confidence_0.312_Length_1141, vo_n1_Locus_5721_Transcript_1/9_Confidence_0.278_Length_986, vo_n2_Locus_475_Transcript_2/13_Confidence_0.312_Length_1187, vo_c2_Locus_324_Transcript_2/12_Confidence_0.400_Length_1106, vo_c3_Locus_3927_Transcript_2/9_Confidence_0.250_Length_2629, vo_c2_Locus_1828_Transcript_1/2_Confidence_0.963_Length_1886, vo_n2_Locus_19533_Transcript_1/1_Confidence_0.000_Length_1783, vo_c1_Locus_34898_Transcript_1/1_Confidence_0.000_Length_1083, vo_n2_Locus_8097_Transcript_1/6_Confidence_0.500_Length_1196, vo_n1_Locus_565_Transcript_31/31_Confidence_0.178_Length_3922, vo_c3_Locus_2800_Transcript_3/23_Confidence_0.566_Length_1690, vo_c3_Locus_2800_Transcript_9/23_Confidence_0.585_Length_1396, tri_n_comp21653_c0_seq1, vo_n1_Locus_565_Transcript_5/31_Confidence_0.244_Length_1533, vo_n2_Locus_4661_Transcript_5/12_Confidence_0.208_Length_1240, vo_n1_Locus_565_Transcript_17/31_Confidence_0.422_Length_1454, vo_c3_Locus_2800_Transcript_5/23_Confidence_0.566_Length_2133, vo_c1_Locus_1757_Transcript_17/19_Confidence_0.375_Length_1367, vo_c1_Locus_298_Transcript_4/32_Confidence_0.255_Length_1585, vo_n1_Locus_8402_Transcript_3/4_Confidence_0.286_Length_1464, vo_c3_Locus_2800_Transcript_23/23_Confidence_0.151_Length_1466, vo_n2_Locus_903_Transcript_38/40_Confidence_0.222_Length_6612, vo_n1_Locus_565_Transcript_20/31_Confidence_0.444_Length_1622, vo_n2_Locus_2046_Transcript_7/18_Confidence_0.345_Length_1296, vo_c3_Locus_2800_Transcript_8/23_Confidence_0.585_Length_1344, vo_n3_Locus_1119_Transcript_19/50_Confidence_0.050_Length_498, vo_c2_Locus_5742_Transcript_10/21_Confidence_0.244_Length_1454, vo_n3_Locus_1119_Transcript_11/50_Confidence_0.124_Length_2839, vo_c2_Locus_5742_Transcript_18/21_Confidence_0.317_Length_2233, vo_n1_Locus_565_Transcript_13/31_Confidence_0.378_Length_1400, vo_c3_Locus_2800_Transcript_14/23_Confidence_0.321_Length_1426, vo_c3_Locus_614_Transcript_19/24_Confidence_0.394_Length_3443, vo_c2_Locus_358_Transcript_1/41_Confidence_0.080_Length_1708, vo_c2_Locus_5742_Transcript_14/21_Confidence_0.439_Length_2413, vo_c1_Locus_1757_Transcript_8/19_Confidence_0.458_Length_1460, vo_n1_Locus_986_Transcript_16/36_Confidence_0.211_Length_1811, vo_n1_Locus_565_Transcript_16/31_Confidence_0.400_Length_1499, vo_n2_Locus_903_Transcript_37/40_Confidence_0.346_Length_3926, tri_c_comp20312_c0_seq4, vo_c3_Locus_614_Transcript_13/24_Confidence_0.061_Length_4970, vo_n2_Locus_2046_Transcript_11/18_Confidence_0.310_Length_1666, vo_n2_Locus_903_Transcript_31/40_Confidence_0.321_Length_2251, vo_n1_Locus_565_Transcript_30/31_Confidence_0.422_Length_3814, vo_c3_Locus_614_Transcript_2/24_Confidence_0.485_Length_1777, vo_n1_Locus_5148_Transcript_1/4_Confidence_0.667_Length_1983, vo_c1_Locus_10454_Transcript_1/2_Confidence_0.750_Length_1441, vo_n3_Locus_1119_Transcript_18/50_Confidence_0.149_Length_1959, vo_c3_Locus_21070_Transcript_1/1_Confidence_0.000_Length_1698, vo_c3_Locus_6327_Transcript_1/2_Confidence_0.750_Length_2258, tri_c_comp28824_c0_seq1, vo_n1_Locus_11871_Transcript_1/1_Confidence_0.000_Length_1701, vo_n3_Locus_27_Transcript_1/1_Confidence_0.000_Length_1278, vo_c3_Locus_6327_Transcript_2/2_Confidence_0.250_Length_2279, vo_c2_Locus_40594_Transcript_2/3_Confidence_0.500_Length_1728, vo_n2_Locus_39295_Transcript_2/2_Confidence_0.500_Length_1939, vo_c2_Locus_6460_Transcript_1/2_Confidence_1.000_Length_1563, vo_n1_Locus_3261_Transcript_3/4_Confidence_0.667_Length_1633, vo_n3_Locus_27_Transcript_1/1_Confidence_0.000_Length_1278, tri_c_comp23875_c0_seq1, tri_c_comp24147_c0_seq1, vo_c1_Locus_4576_Transcript_2/2_Confidence_0.000_Length_1644, vo_c2_Locus_35825_Transcript_1/2_Confidence_0.500_Length_995, vo_c2_Locus_35825_Transcript_2/2_Confidence_0.000_Length_972, vo_c1_Locus_18906_Transcript_3/4_Confidence_0.400_Length_1298, tri_n_comp34093_c0_seq1, vo_c2_Locus_11939_Transcript_1/4_Confidence_0.273_Length_1336, vo_c2_Locus_4832_Transcript_1/1_Confidence_0.000_Length_1285, tri_c_comp20306_c0_seq1, vo_c1_Locus_3665_Transcript_26/28_Confidence_0.462_Length_1222, vo_c2_Locus_1898_Transcript_1/15_Confidence_0.462_Length_1289, vo_n1_Locus_13598_Transcript_3/3_Confidence_0.143_Length_1862, tri_n_comp61454_c0_seq1, vo_c3_Locus_27324_Transcript_1/1_Confidence_0.000_Length_1468, vo_n3_Locus_17668_Transcript_1/2_Confidence_1.000_Length_1468, vo_c1_Locus_13556_Transcript_2/2_Confidence_0.000_Length_1297, tri_c_comp22527_c0_seq1, vo_n1_Locus_10504_Transcript_1/2_Confidence_0.750_Length_1211, vo_c2_Locus_9062_Transcript_1/11_Confidence_0.312_Length_4797</p> |
|---------------------------------|----------|----|--------------------------------------------------------------------------------------------------------------------------------------------------------------------------------------------------------------------------------------------------------------------------------------------------------------------------------------------------------------------------------------------------------------------------------------------------------------------------------------------------------------|-------------------------------------------------|------------------------------------------------------------------------------------------------------------------------------------------------------------------------------------------------------------------------------------------------------------------------------------------------------------------------------------------------------------------------------------------------------------------------------------------------------------------------------------------------------------------------------------------------------------------------------------------------------------------------------------------------------------------------------------------------------------------------------------------------------------------------------------------------------------------------------------------------------------------------------------------------------------------------------------------------------------------------------------------------------------------------------------------------------------------------------------------------------------------------------------------------------------------------------------------------------------------------------------------------------------------------------------------------------------------------------------------------------------------------------------------------------------------------------------------------------------------------------------------------------------------------------------------------------------------------------------------------------------------------------------------------------------------------------------------------------------------------------------------------------------------------------------------------------------------------------------------------------------------------------------------------------------------------------------------------------------------------------------------------------------------------------------------------------------------------------------------------------------------------------------------------------------------------------------------------------------------------------------------------------------------------------------------------------------------------------------------------------------------------------------------------------------------------------------------------------------------------------------------------------------------------------------------------------------------------------------------------------------------------------------------------------------------------------------------------------------------------------------------------------------------------------------------------------------------------------------------------------------------------------------------------------------------------------------------------------------------------------------------------------------------------------------------------------------------------------------------------------------------------------------------------------------------------------------------------------------------------------------------------------------------------------------------------------------------------------------------------------------------------------------------------------------------------------------------------------------------------------------------------------------------------------------------------------------------------------------------------------------------------------------------------------------------------------------------------------------------------------------------------------------------------------------------------------------------------------------------------------------------------------------------------------------------------------------------------------------------------------------------------------------------------------------------------------------------------------------------------------------------------------------------------------------------------------------------------------------------------------------------------------------------------------------------------------------------------------------------------------------------------------------------------------------------------------------------------------------------------------------------------------------------------------------------------------------------------------------------------------------------------------------------------------------------------------------------------------------------------------------------------------------------------------------------------------------------------------------------------------------------------------------------------------------------------------------------------------------------------------------------------------------------------------------------------------------------------------------------------------------------------------------------------------------------------------------------------------------------------------------------------------------------------------------------------------------------------------------------------------------------------------------------------------------------------------------------------------------------------------------------------------------------------------------------------------------------------------------------------------------------------------------------------------------------------------------------------------------|

|                    |          |    |                                                                                                                                                                                                                                                                                                                                                                                                                                                                                                                            |                                                                                |                                                                                                                                                                                                                                                                                                                                                                                                                                                                                                                                                                                                                                                                                                                                                                                                                                                                                                                                                                                                                                                                                                                                                                                                                                                                                                                                                                                                                                                                                                                                                                                                                                                                                                                                                                                                                                                                                                                                                                                                                                                                                                                                                                                                                                                                                                                                                                                                                                                                                                                                                                                                                                                                                                                                                                                                                                                                                                                                                                                                                                                                                                                                                                                                                                                                                                                                                                                                                                                                                                                                                                                                                                                                                                                                                                                                                                                                                                                                                                                                                                                                                                                                                                                                                                                                                                                                                                                                                                                                                                                                                                                                                                                                                                                                                                                                                                                                                                                                                                                                                                                                                                                                                                                                                                                                                                                                                                                                                                                                                                                                                                                                                                                                                                                                                                                                                                                                                                                                                                                                                                                                                                                                                                                                                                                                                                                                                                                                                                                                                                                                                                                                                                                                                                                                                                                                                                                                                                                                                                                                                                                                                                                                                                                                                                                                                                                |
|--------------------|----------|----|----------------------------------------------------------------------------------------------------------------------------------------------------------------------------------------------------------------------------------------------------------------------------------------------------------------------------------------------------------------------------------------------------------------------------------------------------------------------------------------------------------------------------|--------------------------------------------------------------------------------|----------------------------------------------------------------------------------------------------------------------------------------------------------------------------------------------------------------------------------------------------------------------------------------------------------------------------------------------------------------------------------------------------------------------------------------------------------------------------------------------------------------------------------------------------------------------------------------------------------------------------------------------------------------------------------------------------------------------------------------------------------------------------------------------------------------------------------------------------------------------------------------------------------------------------------------------------------------------------------------------------------------------------------------------------------------------------------------------------------------------------------------------------------------------------------------------------------------------------------------------------------------------------------------------------------------------------------------------------------------------------------------------------------------------------------------------------------------------------------------------------------------------------------------------------------------------------------------------------------------------------------------------------------------------------------------------------------------------------------------------------------------------------------------------------------------------------------------------------------------------------------------------------------------------------------------------------------------------------------------------------------------------------------------------------------------------------------------------------------------------------------------------------------------------------------------------------------------------------------------------------------------------------------------------------------------------------------------------------------------------------------------------------------------------------------------------------------------------------------------------------------------------------------------------------------------------------------------------------------------------------------------------------------------------------------------------------------------------------------------------------------------------------------------------------------------------------------------------------------------------------------------------------------------------------------------------------------------------------------------------------------------------------------------------------------------------------------------------------------------------------------------------------------------------------------------------------------------------------------------------------------------------------------------------------------------------------------------------------------------------------------------------------------------------------------------------------------------------------------------------------------------------------------------------------------------------------------------------------------------------------------------------------------------------------------------------------------------------------------------------------------------------------------------------------------------------------------------------------------------------------------------------------------------------------------------------------------------------------------------------------------------------------------------------------------------------------------------------------------------------------------------------------------------------------------------------------------------------------------------------------------------------------------------------------------------------------------------------------------------------------------------------------------------------------------------------------------------------------------------------------------------------------------------------------------------------------------------------------------------------------------------------------------------------------------------------------------------------------------------------------------------------------------------------------------------------------------------------------------------------------------------------------------------------------------------------------------------------------------------------------------------------------------------------------------------------------------------------------------------------------------------------------------------------------------------------------------------------------------------------------------------------------------------------------------------------------------------------------------------------------------------------------------------------------------------------------------------------------------------------------------------------------------------------------------------------------------------------------------------------------------------------------------------------------------------------------------------------------------------------------------------------------------------------------------------------------------------------------------------------------------------------------------------------------------------------------------------------------------------------------------------------------------------------------------------------------------------------------------------------------------------------------------------------------------------------------------------------------------------------------------------------------------------------------------------------------------------------------------------------------------------------------------------------------------------------------------------------------------------------------------------------------------------------------------------------------------------------------------------------------------------------------------------------------------------------------------------------------------------------------------------------------------------------------------------------------------------------------------------------------------------------------------------------------------------------------------------------------------------------------------------------------------------------------------------------------------------------------------------------------------------------------------------------------------------------------------------------------------------------------------------------------------------------------------------|
| Methane metabolism | map00680 | 16 | <p>ec:2.6.1.52 - transaminase,<br/> ec:4.1.3.24 - lyase,<br/> ec:1.2.1.46 - dehydrogenase, ec:2.7.1.29 - kinase, ec:2.7.1.11 - phosphohexokinase,<br/> ec:6.2.1.1 - ligase,<br/> ec:3.1.2.12 - hydrolase,<br/> ec:3.1.3.3 - phosphatase,<br/> ec:2.1.2.1 - hydroxymethyltransferase,<br/> ec:4.1.2.13 - aldolase,<br/> ec:3.1.3.11 - hexose diphosphatase, ec:1.1.1.284 - dehydrogenase,<br/> ec:4.2.1.11 - hydratase,<br/> ec:2.5.1.77 - synthase,<br/> ec:2.7.9.2 - water dikinase,<br/> ec:1.1.1.37 - dehydrogenase</p> | <p>4, 15, 2, 2,<br/> 5, 1, 2, 2,<br/> 9, 38, 8, 2,<br/> 23, 1, 15,<br/> 24</p> | <p>vo_n2_Locus_2440_Transcript_3/6_Confidence_0.182_Length_1751, tri_c_comp24934_c0_seq1,<br/> vo_c3_Locus_9067_Transcript_6/7_Confidence_0.125_Length_1757, vo_c2_Locus_1886_Transcript_3/5_Confidence_0.444_Length_2764,<br/> vo_c1_Locus_9668_Transcript_5/11_Confidence_0.391_Length_1245, vo_c2_Locus_3988_Transcript_2/10_Confidence_0.500_Length_1233,<br/> vo_n3_Locus_4554_Transcript_5/8_Confidence_0.600_Length_1377, vo_c2_Locus_3988_Transcript_1/10_Confidence_0.607_Length_1361,<br/> vo_n1_Locus_2626_Transcript_19/26_Confidence_0.238_Length_3851, vo_c1_Locus_9668_Transcript_4/11_Confidence_0.435_Length_1360,<br/> vo_n1_Locus_2626_Transcript_15/26_Confidence_0.262_Length_1311, vo_c1_Locus_9668_Transcript_6/11_Confidence_0.348_Length_1630,<br/> vo_n2_Locus_3_Transcript_5064/24291_Confidence_0.000_Length_1233, vo_n3_Locus_4554_Transcript_6/8_Confidence_0.533_Length_1337,<br/> vo_c2_Locus_3988_Transcript_5/10_Confidence_0.536_Length_2785, vo_n1_Locus_2626_Transcript_18/26_Confidence_0.310_Length_2079,<br/> vo_c2_Locus_3988_Transcript_7/10_Confidence_0.500_Length_1273, vo_n2_Locus_3_Transcript_5069/24291_Confidence_0.000_Length_1240,<br/> vo_c2_Locus_3988_Transcript_9/10_Confidence_0.429_Length_1401, vo_c3_Locus_11405_Transcript_4/5_Confidence_0.429_Length_4324,<br/> vo_c3_Locus_15849_Transcript_1/1_Confidence_0.000_Length_1425, vo_n1_Locus_15871_Transcript_1/1_Confidence_0.000_Length_1944,<br/> vo_c2_Locus_10095_Transcript_1/4_Confidence_0.286_Length_4859, vo_c3_Locus_1613_Transcript_6/17_Confidence_0.158_Length_5809,<br/> vo_n1_Locus_10193_Transcript_1/1_Confidence_0.000_Length_1647, vo_c2_Locus_6348_Transcript_1/2_Confidence_1.000_Length_3755,<br/> vo_n3_Locus_23556_Transcript_2/4_Confidence_0.500_Length_4210, tri_c_comp43537_c0_seq1,<br/> vo_n3_Locus_9269_Transcript_1/1_Confidence_0.000_Length_2238, vo_n2_Locus_8305_Transcript_5/8_Confidence_0.143_Length_2284,<br/> vo_n1_Locus_29308_Transcript_2/2_Confidence_0.000_Length_535, vo_c3_Locus_3840_Transcript_2/5_Confidence_0.200_Length_1699,<br/> vo_c2_Locus_27691_Transcript_1/2_Confidence_0.750_Length_923, vo_c2_Locus_1465_Transcript_1/1_Confidence_0.000_Length_2684,<br/> vo_n2_Locus_668_Transcript_12/17_Confidence_0.465_Length_3343, vo_n3_Locus_1281_Transcript_13/14_Confidence_0.467_Length_2089,<br/> vo_n2_Locus_668_Transcript_10/17_Confidence_0.419_Length_1865, vo_c3_Locus_6604_Transcript_15/15_Confidence_0.590_Length_1792,<br/> vo_n3_Locus_1281_Transcript_3/14_Confidence_0.533_Length_1904, vo_c3_Locus_6604_Transcript_12/15_Confidence_0.230_Length_1729,<br/> tri_n_comp22443_c0_seq1, vo_c2_Locus_2191_Transcript_14/17_Confidence_0.464_Length_1841,<br/> vo_n1_Locus_565_Transcript_31/31_Confidence_0.178_Length_3922, vo_c3_Locus_2800_Transcript_3/23_Confidence_0.566_Length_1690,<br/> vo_c3_Locus_2800_Transcript_9/23_Confidence_0.585_Length_1396, tri_n_comp21653_c0_seq1,<br/> vo_n1_Locus_565_Transcript_5/31_Confidence_0.244_Length_1533, vo_n2_Locus_4661_Transcript_5/12_Confidence_0.208_Length_1240,<br/> vo_n1_Locus_565_Transcript_17/31_Confidence_0.422_Length_1454, vo_c3_Locus_2800_Transcript_5/23_Confidence_0.566_Length_2133,<br/> vo_c1_Locus_1757_Transcript_17/19_Confidence_0.375_Length_1367, vo_c1_Locus_298_Transcript_4/32_Confidence_0.255_Length_1585,<br/> vo_n1_Locus_8402_Transcript_3/4_Confidence_0.286_Length_1464, vo_c3_Locus_2800_Transcript_23/23_Confidence_0.151_Length_1466,<br/> vo_n2_Locus_903_Transcript_38/40_Confidence_0.222_Length_6612, vo_n1_Locus_565_Transcript_20/31_Confidence_0.444_Length_1622,<br/> vo_n2_Locus_2046_Transcript_7/18_Confidence_0.345_Length_1296, vo_c3_Locus_2800_Transcript_8/23_Confidence_0.585_Length_1344,<br/> vo_n3_Locus_1119_Transcript_19/50_Confidence_0.050_Length_498, vo_c2_Locus_5742_Transcript_10/21_Confidence_0.244_Length_1454,<br/> vo_n3_Locus_1119_Transcript_11/50_Confidence_0.124_Length_2839, vo_c2_Locus_5742_Transcript_18/21_Confidence_0.317_Length_2233,<br/> vo_n1_Locus_565_Transcript_13/31_Confidence_0.378_Length_1400, vo_c3_Locus_2800_Transcript_14/23_Confidence_0.321_Length_1426,<br/> vo_c3_Locus_614_Transcript_19/24_Confidence_0.394_Length_3443, vo_c2_Locus_358_Transcript_1/41_Confidence_0.080_Length_1708,<br/> vo_c2_Locus_5742_Transcript_14/21_Confidence_0.439_Length_2413, vo_c1_Locus_1757_Transcript_8/19_Confidence_0.458_Length_1460,<br/> vo_n1_Locus_986_Transcript_16/36_Confidence_0.211_Length_1811, vo_n1_Locus_565_Transcript_16/31_Confidence_0.400_Length_1499,<br/> vo_n2_Locus_903_Transcript_37/40_Confidence_0.346_Length_3926, tri_c_comp20312_c0_seq4,<br/> vo_c3_Locus_614_Transcript_13/24_Confidence_0.061_Length_4970, vo_n2_Locus_2046_Transcript_11/18_Confidence_0.310_Length_1666,<br/> vo_n2_Locus_903_Transcript_31/40_Confidence_0.321_Length_2251, vo_n1_Locus_565_Transcript_30/31_Confidence_0.422_Length_3814,<br/> vo_c3_Locus_614_Transcript_2/24_Confidence_0.485_Length_1777, vo_n1_Locus_5148_Transcript_1/4_Confidence_0.667_Length_1983,<br/> vo_c1_Locus_10454_Transcript_1/2_Confidence_0.750_Length_1441, vo_n3_Locus_1119_Transcript_18/50_Confidence_0.149_Length_1959,<br/> vo_c2_Locus_40594_Transcript_2/3_Confidence_0.500_Length_1728, vo_n2_Locus_39295_Transcript_2/2_Confidence_0.500_Length_1939,<br/> vo_c2_Locus_6460_Transcript_1/2_Confidence_1.000_Length_1563, vo_n1_Locus_3261_Transcript_3/4_Confidence_0.667_Length_1633,<br/> vo_n3_Locus_27_Transcript_1/1_Confidence_0.000_Length_1278, tri_c_comp23875_c0_seq1, tri_c_comp24147_c0_seq1,<br/> vo_c1_Locus_4576_Transcript_2/2_Confidence_0.000_Length_1644, vo_c3_Locus_11405_Transcript_4/5_Confidence_0.429_Length_4324,<br/> vo_c3_Locus_15849_Transcript_1/1_Confidence_0.000_Length_1425, tri_n_comp18813_c0_seq8, tri_c_comp19022_c0_seq2,<br/> vo_n2_Locus_106_Transcript_27/30_Confidence_0.078_Length_2735, vo_c2_Locus_2699_Transcript_2/7_Confidence_0.471_Length_1721,<br/> vo_n2_Locus_106_Transcript_24/30_Confidence_0.219_Length_3708, vo_n3_Locus_362_Transcript_1/4_Confidence_0.727_Length_3306,<br/> vo_n3_Locus_3996_Transcript_1/4_Confidence_0.417_Length_1642, vo_n1_Locus_3710_Transcript_9/10_Confidence_0.500_Length_1616,<br/> vo_n2_Locus_106_Transcript_25/30_Confidence_0.188_Length_2659, vo_n2_Locus_1384_Transcript_2/5_Confidence_0.308_Length_2123,<br/> vo_n3_Locus_3996_Transcript_3/4_Confidence_0.500_Length_3581, tri_n_comp18813_c0_seq3,<br/> vo_c1_Locus_6488_Transcript_4/4_Confidence_0.250_Length_8239, vo_c2_Locus_1551_Transcript_20/27_Confidence_0.238_Length_2634,<br/> tri_n_comp18813_c0_seq13, vo_n3_Locus_685_Transcript_7/8_Confidence_0.353_Length_1680,<br/> vo_n2_Locus_1324_Transcript_10/14_Confidence_0.296_Length_1766, vo_c3_Locus_1613_Transcript_6/17_Confidence_0.158_Length_5809,<br/> vo_n3_Locus_685_Transcript_3/8_Confidence_0.471_Length_1755, vo_c2_Locus_16827_Transcript_1/1_Confidence_0.000_Length_1783,<br/> vo_n3_Locus_362_Transcript_3/4_Confidence_0.364_Length_3895, vo_c3_Locus_1613_Transcript_11/17_Confidence_0.316_Length_2455,<br/> tri_c_comp13285_c0_seq1, tri_n_comp12586_c0_seq4, vo_c1_Locus_1662_Transcript_19/44_Confidence_0.278_Length_3148,</p> |
|--------------------|----------|----|----------------------------------------------------------------------------------------------------------------------------------------------------------------------------------------------------------------------------------------------------------------------------------------------------------------------------------------------------------------------------------------------------------------------------------------------------------------------------------------------------------------------------|--------------------------------------------------------------------------------|----------------------------------------------------------------------------------------------------------------------------------------------------------------------------------------------------------------------------------------------------------------------------------------------------------------------------------------------------------------------------------------------------------------------------------------------------------------------------------------------------------------------------------------------------------------------------------------------------------------------------------------------------------------------------------------------------------------------------------------------------------------------------------------------------------------------------------------------------------------------------------------------------------------------------------------------------------------------------------------------------------------------------------------------------------------------------------------------------------------------------------------------------------------------------------------------------------------------------------------------------------------------------------------------------------------------------------------------------------------------------------------------------------------------------------------------------------------------------------------------------------------------------------------------------------------------------------------------------------------------------------------------------------------------------------------------------------------------------------------------------------------------------------------------------------------------------------------------------------------------------------------------------------------------------------------------------------------------------------------------------------------------------------------------------------------------------------------------------------------------------------------------------------------------------------------------------------------------------------------------------------------------------------------------------------------------------------------------------------------------------------------------------------------------------------------------------------------------------------------------------------------------------------------------------------------------------------------------------------------------------------------------------------------------------------------------------------------------------------------------------------------------------------------------------------------------------------------------------------------------------------------------------------------------------------------------------------------------------------------------------------------------------------------------------------------------------------------------------------------------------------------------------------------------------------------------------------------------------------------------------------------------------------------------------------------------------------------------------------------------------------------------------------------------------------------------------------------------------------------------------------------------------------------------------------------------------------------------------------------------------------------------------------------------------------------------------------------------------------------------------------------------------------------------------------------------------------------------------------------------------------------------------------------------------------------------------------------------------------------------------------------------------------------------------------------------------------------------------------------------------------------------------------------------------------------------------------------------------------------------------------------------------------------------------------------------------------------------------------------------------------------------------------------------------------------------------------------------------------------------------------------------------------------------------------------------------------------------------------------------------------------------------------------------------------------------------------------------------------------------------------------------------------------------------------------------------------------------------------------------------------------------------------------------------------------------------------------------------------------------------------------------------------------------------------------------------------------------------------------------------------------------------------------------------------------------------------------------------------------------------------------------------------------------------------------------------------------------------------------------------------------------------------------------------------------------------------------------------------------------------------------------------------------------------------------------------------------------------------------------------------------------------------------------------------------------------------------------------------------------------------------------------------------------------------------------------------------------------------------------------------------------------------------------------------------------------------------------------------------------------------------------------------------------------------------------------------------------------------------------------------------------------------------------------------------------------------------------------------------------------------------------------------------------------------------------------------------------------------------------------------------------------------------------------------------------------------------------------------------------------------------------------------------------------------------------------------------------------------------------------------------------------------------------------------------------------------------------------------------------------------------------------------------------------------------------------------------------------------------------------------------------------------------------------------------------------------------------------------------------------------------------------------------------------------------------------------------------------------------------------------------------------------------------------------------------------------------------------------------------------------------------------------------------------------------|

|  |  |  |  |  |                                                                                                                                                                                                                                                                                                                                                                                                                                                                                                                                                                                                                                                                                                                                                                                                                                                                                                                                                                                                                                                                                                                                                                                                                                                                                                                                                                                                                                                                                                                                                                                                                                                                                                                                                                                                                                                                                                                                                                                                                                                                                                                                                                                                                                                                                                                                                                                                                  |
|--|--|--|--|--|------------------------------------------------------------------------------------------------------------------------------------------------------------------------------------------------------------------------------------------------------------------------------------------------------------------------------------------------------------------------------------------------------------------------------------------------------------------------------------------------------------------------------------------------------------------------------------------------------------------------------------------------------------------------------------------------------------------------------------------------------------------------------------------------------------------------------------------------------------------------------------------------------------------------------------------------------------------------------------------------------------------------------------------------------------------------------------------------------------------------------------------------------------------------------------------------------------------------------------------------------------------------------------------------------------------------------------------------------------------------------------------------------------------------------------------------------------------------------------------------------------------------------------------------------------------------------------------------------------------------------------------------------------------------------------------------------------------------------------------------------------------------------------------------------------------------------------------------------------------------------------------------------------------------------------------------------------------------------------------------------------------------------------------------------------------------------------------------------------------------------------------------------------------------------------------------------------------------------------------------------------------------------------------------------------------------------------------------------------------------------------------------------------------|
|  |  |  |  |  | <p>vo_n2_Locus_1146_Transcript_9/32_Confidence_0.492_Length_2897, vo_n3_Locus_3213_Transcript_1/29_Confidence_0.022_Length_515, vo_n1_Locus_1032_Transcript_1/39_Confidence_0.018_Length_458, tri_n_comp20108_c0_seq2, vo_c1_Locus_1662_Transcript_28/44_Confidence_0.200_Length_3087, vo_c2_Locus_49_Transcript_21/157_Confidence_0.007_Length_465, vo_c2_Locus_49_Transcript_31/157_Confidence_0.027_Length_1554, vo_c2_Locus_49_Transcript_20/157_Confidence_0.037_Length_3535, vo_c1_Locus_1662_Transcript_6/44_Confidence_0.211_Length_3160, vo_c2_Locus_49_Transcript_28/157_Confidence_0.071_Length_2983, vo_n1_Locus_1032_Transcript_5/39_Confidence_0.404_Length_3016, vo_n1_Locus_1032_Transcript_38/39_Confidence_0.228_Length_2924, vo_n1_Locus_1032_Transcript_8/39_Confidence_0.386_Length_2954, vo_c3_Locus_1031_Transcript_12/33_Confidence_0.385_Length_3145, vo_c3_Locus_1723_Transcript_29/37_Confidence_0.411_Length_1695, vo_n2_Locus_330_Transcript_25/38_Confidence_0.361_Length_1516, vo_c3_Locus_1723_Transcript_35/37_Confidence_0.464_Length_1702, vo_c1_Locus_15206_Transcript_3/3_Confidence_0.000_Length_1312, vo_c1_Locus_7371_Transcript_4/4_Confidence_0.600_Length_1352, vo_c3_Locus_1723_Transcript_37/37_Confidence_0.214_Length_1530, vo_n1_Locus_769_Transcript_28/41_Confidence_0.400_Length_1609, vo_n1_Locus_769_Transcript_9/41_Confidence_0.460_Length_1494, vo_c3_Locus_2965_Transcript_2/2_Confidence_0.250_Length_1327, vo_n2_Locus_330_Transcript_5/38_Confidence_0.328_Length_11715, vo_n1_Locus_9772_Transcript_1/2_Confidence_0.333_Length_1224, vo_c1_Locus_3603_Transcript_44/48_Confidence_0.492_Length_1696, vo_c2_Locus_4242_Transcript_2/3_Confidence_0.400_Length_1168, vo_n1_Locus_6649_Transcript_2/3_Confidence_0.500_Length_2124, vo_c1_Locus_7371_Transcript_1/4_Confidence_0.500_Length_1352, vo_n3_Locus_2381_Transcript_2/3_Confidence_0.500_Length_1330, vo_c3_Locus_1723_Transcript_16/37_Confidence_0.286_Length_1491, vo_n1_Locus_769_Transcript_36/41_Confidence_0.420_Length_1536, vo_n1_Locus_769_Transcript_40/41_Confidence_0.320_Length_1479, vo_n1_Locus_6649_Transcript_1/3_Confidence_0.750_Length_1883, vo_c1_Locus_3603_Transcript_26/48_Confidence_0.400_Length_1432, vo_n1_Locus_5348_Transcript_2/2_Confidence_0.200_Length_1608, vo_n3_Locus_3383_Transcript_35/37_Confidence_0.389_Length_1512, tri_c_comp20802_c0_seq1</p> |
|--|--|--|--|--|------------------------------------------------------------------------------------------------------------------------------------------------------------------------------------------------------------------------------------------------------------------------------------------------------------------------------------------------------------------------------------------------------------------------------------------------------------------------------------------------------------------------------------------------------------------------------------------------------------------------------------------------------------------------------------------------------------------------------------------------------------------------------------------------------------------------------------------------------------------------------------------------------------------------------------------------------------------------------------------------------------------------------------------------------------------------------------------------------------------------------------------------------------------------------------------------------------------------------------------------------------------------------------------------------------------------------------------------------------------------------------------------------------------------------------------------------------------------------------------------------------------------------------------------------------------------------------------------------------------------------------------------------------------------------------------------------------------------------------------------------------------------------------------------------------------------------------------------------------------------------------------------------------------------------------------------------------------------------------------------------------------------------------------------------------------------------------------------------------------------------------------------------------------------------------------------------------------------------------------------------------------------------------------------------------------------------------------------------------------------------------------------------------------|



|                      |          |    |                                                                                                                                                                                                                                                                                                                                                                                                                                                                                                                                                                                                   |                                                                        |                                                                                                                                                                                                                                                                                                                                                                                                                                                                                                                                                                                                                                                                                                                                                                                                                                                                                                                                                                                                                                                                                                                                                                                                                                                                                                                                                                                                                                                                                                                                                                                                                                                                                                                                                                                                                                                                                                                                                                                                                                                                                                                                                                                                                                                                                                                                                                                                                                                                                                                                                                                                                                                                                                                                                                                                                                                                                                                                                                                                                                                                                                                                                                                                                                                                                                                                                                                                                                                                                                                                                                                                                                                                                                                                                                                                                                                                                                                                                                                                                                                                                                                                                                                                                                                                                                                                                |
|----------------------|----------|----|---------------------------------------------------------------------------------------------------------------------------------------------------------------------------------------------------------------------------------------------------------------------------------------------------------------------------------------------------------------------------------------------------------------------------------------------------------------------------------------------------------------------------------------------------------------------------------------------------|------------------------------------------------------------------------|------------------------------------------------------------------------------------------------------------------------------------------------------------------------------------------------------------------------------------------------------------------------------------------------------------------------------------------------------------------------------------------------------------------------------------------------------------------------------------------------------------------------------------------------------------------------------------------------------------------------------------------------------------------------------------------------------------------------------------------------------------------------------------------------------------------------------------------------------------------------------------------------------------------------------------------------------------------------------------------------------------------------------------------------------------------------------------------------------------------------------------------------------------------------------------------------------------------------------------------------------------------------------------------------------------------------------------------------------------------------------------------------------------------------------------------------------------------------------------------------------------------------------------------------------------------------------------------------------------------------------------------------------------------------------------------------------------------------------------------------------------------------------------------------------------------------------------------------------------------------------------------------------------------------------------------------------------------------------------------------------------------------------------------------------------------------------------------------------------------------------------------------------------------------------------------------------------------------------------------------------------------------------------------------------------------------------------------------------------------------------------------------------------------------------------------------------------------------------------------------------------------------------------------------------------------------------------------------------------------------------------------------------------------------------------------------------------------------------------------------------------------------------------------------------------------------------------------------------------------------------------------------------------------------------------------------------------------------------------------------------------------------------------------------------------------------------------------------------------------------------------------------------------------------------------------------------------------------------------------------------------------------------------------------------------------------------------------------------------------------------------------------------------------------------------------------------------------------------------------------------------------------------------------------------------------------------------------------------------------------------------------------------------------------------------------------------------------------------------------------------------------------------------------------------------------------------------------------------------------------------------------------------------------------------------------------------------------------------------------------------------------------------------------------------------------------------------------------------------------------------------------------------------------------------------------------------------------------------------------------------------------------------------------------------------------------------------------------|
| Butanoate metabolism | map00650 | 16 | <p>ec:2.6.1.19 - transaminase,<br/> ec:1.3.5.1 - dehydrogenase,<br/> ec:1.2.1.24 - dehydrogenase<br/> (NAD+), ec:2.2.1.6 -<br/> synthase, ec:5.1.2.3 -<br/> epimerase, ec:1.2.1.16 -<br/> dehydrogenase [NAD(P)+],<br/> ec:2.3.1.9 - C-<br/> acetyltransferase,<br/> ec:2.3.3.10 - synthase,<br/> ec:1.3.8.1 - acyl-CoA<br/> dehydrogenase, ec:2.3.1.54<br/> - C-acetyltransferase,<br/> ec:2.8.3.8 - CoA-transferase,<br/> ec:2.8.3.5 - CoA-transferase,<br/> ec:4.2.1.17 - hydratase,<br/> ec:1.1.1.36 - reductase,<br/> ec:1.1.1.35 -<br/> dehydrogenase, ec:1.1.1.30<br/> - dehydrogenase</p> | <p>2, 11, 1, 1,<br/> 2, 1, 2, 4,<br/> 2, 9, 1, 1,<br/> 7, 1, 16, 6</p> | <p>vo_c3_Locus_29526_Transcript_7/10_Confidence_0.268_Length_874, vo_c2_Locus_844_Transcript_5/40_Confidence_0.162_Length_2081,<br/> vo_n2_Locus_5500_Transcript_5/5_Confidence_0.308_Length_1268, vo_n2_Locus_5500_Transcript_1/5_Confidence_0.308_Length_1100,<br/> tri_n_comp12494_c0_seq1, vo_n2_Locus_5500_Transcript_2/5_Confidence_0.538_Length_1312,<br/> vo_n2_Locus_2182_Transcript_14/15_Confidence_0.458_Length_3129, vo_c2_Locus_642_Transcript_3/10_Confidence_0.571_Length_2141,<br/> vo_n1_Locus_1508_Transcript_4/6_Confidence_0.429_Length_1979, vo_n1_Locus_2259_Transcript_6/13_Confidence_0.429_Length_1275,<br/> vo_n1_Locus_2259_Transcript_9/13_Confidence_0.429_Length_1314, vo_c1_Locus_1462_Transcript_1/46_Confidence_0.182_Length_2129,<br/> vo_c1_Locus_1462_Transcript_8/46_Confidence_0.530_Length_9104, vo_c1_Locus_24159_Transcript_1/2_Confidence_0.333_Length_1573,<br/> tri_n_comp26150_c0_seq1, vo_n1_Locus_11137_Transcript_5/5_Confidence_0.143_Length_2829,<br/> vo_c3_Locus_9925_Transcript_8/11_Confidence_0.263_Length_3550, vo_c1_Locus_24159_Transcript_1/2_Confidence_0.333_Length_1573,<br/> vo_c1_Locus_2657_Transcript_1/1_Confidence_0.000_Length_1513, vo_n2_Locus_23058_Transcript_1/1_Confidence_0.000_Length_1342,<br/> vo_n2_Locus_634_Transcript_4/6_Confidence_0.357_Length_8557, tri_c_comp57035_c0_seq1,<br/> vo_c1_Locus_1809_Transcript_1/1_Confidence_0.000_Length_3087, vo_c3_Locus_18718_Transcript_1/1_Confidence_0.000_Length_2686,<br/> tri_c_comp7217_c0_seq2, vo_c3_Locus_18248_Transcript_1/2_Confidence_0.667_Length_1596,<br/> vo_c3_Locus_1564_Transcript_1/27_Confidence_0.474_Length_3491, vo_n2_Locus_4549_Transcript_18/24_Confidence_0.395_Length_3486,<br/> vo_c1_Locus_1748_Transcript_10/39_Confidence_0.197_Length_3498, vo_c1_Locus_1748_Transcript_19/39_Confidence_0.211_Length_3788,<br/> vo_c1_Locus_1748_Transcript_30/39_Confidence_0.282_Length_4645, vo_n2_Locus_4549_Transcript_11/24_Confidence_0.474_Length_3796,<br/> vo_n1_Locus_103_Transcript_17/28_Confidence_0.483_Length_3469, vo_n3_Locus_2375_Transcript_13/19_Confidence_0.467_Length_3465,<br/> vo_c3_Locus_1564_Transcript_22/27_Confidence_0.526_Length_3527, vo_c2_Locus_6864_Transcript_3/5_Confidence_0.667_Length_1701,<br/> vo_c2_Locus_6864_Transcript_3/5_Confidence_0.667_Length_1701, vo_c2_Locus_2261_Transcript_1/2_Confidence_1.000_Length_2564,<br/> vo_c3_Locus_5948_Transcript_1/1_Confidence_0.000_Length_1027, vo_n2_Locus_16945_Transcript_1/3_Confidence_0.500_Length_1084,<br/> vo_c3_Locus_9925_Transcript_8/11_Confidence_0.263_Length_3550, vo_n1_Locus_11137_Transcript_5/5_Confidence_0.143_Length_2829,<br/> vo_n2_Locus_16945_Transcript_3/3_Confidence_0.000_Length_746, vo_n2_Locus_30747_Transcript_1/1_Confidence_0.000_Length_951,<br/> vo_c1_Locus_2815_Transcript_3/4_Confidence_0.200_Length_2244, vo_c2_Locus_2261_Transcript_1/2_Confidence_1.000_Length_2564,<br/> vo_n1_Locus_9414_Transcript_8/13_Confidence_0.167_Length_606, vo_c1_Locus_40339_Transcript_1/1_Confidence_0.000_Length_1318,<br/> vo_c3_Locus_2031_Transcript_8/8_Confidence_0.111_Length_1389, vo_n1_Locus_11137_Transcript_5/5_Confidence_0.143_Length_2829,<br/> vo_c1_Locus_4675_Transcript_3/3_Confidence_0.200_Length_1348, vo_n2_Locus_30747_Transcript_1/1_Confidence_0.000_Length_951,<br/> vo_n2_Locus_636_Transcript_13/16_Confidence_0.222_Length_768, vo_c1_Locus_2815_Transcript_3/4_Confidence_0.200_Length_2244,<br/> vo_c3_Locus_9925_Transcript_8/11_Confidence_0.263_Length_3550, tri_n_comp42565_c0_seq1,<br/> vo_c2_Locus_189_Transcript_29/60_Confidence_0.015_Length_692, vo_n2_Locus_636_Transcript_16/16_Confidence_0.139_Length_616,<br/> vo_n2_Locus_636_Transcript_14/16_Confidence_0.222_Length_622, vo_n2_Locus_636_Transcript_5/16_Confidence_0.194_Length_591,<br/> vo_n2_Locus_636_Transcript_3/16_Confidence_0.306_Length_685, vo_c3_Locus_1735_Transcript_2/3_Confidence_0.333_Length_8270,<br/> vo_c2_Locus_9268_Transcript_2/5_Confidence_0.500_Length_8293, vo_n2_Locus_10545_Transcript_1/1_Confidence_0.000_Length_1731,<br/> vo_n2_Locus_12693_Transcript_1/1_Confidence_0.000_Length_2082, vo_n2_Locus_19729_Transcript_5/6_Confidence_0.500_Length_1106,<br/> vo_c1_Locus_1033_Transcript_1/1_Confidence_0.000_Length_1983</p> |
|----------------------|----------|----|---------------------------------------------------------------------------------------------------------------------------------------------------------------------------------------------------------------------------------------------------------------------------------------------------------------------------------------------------------------------------------------------------------------------------------------------------------------------------------------------------------------------------------------------------------------------------------------------------|------------------------------------------------------------------------|------------------------------------------------------------------------------------------------------------------------------------------------------------------------------------------------------------------------------------------------------------------------------------------------------------------------------------------------------------------------------------------------------------------------------------------------------------------------------------------------------------------------------------------------------------------------------------------------------------------------------------------------------------------------------------------------------------------------------------------------------------------------------------------------------------------------------------------------------------------------------------------------------------------------------------------------------------------------------------------------------------------------------------------------------------------------------------------------------------------------------------------------------------------------------------------------------------------------------------------------------------------------------------------------------------------------------------------------------------------------------------------------------------------------------------------------------------------------------------------------------------------------------------------------------------------------------------------------------------------------------------------------------------------------------------------------------------------------------------------------------------------------------------------------------------------------------------------------------------------------------------------------------------------------------------------------------------------------------------------------------------------------------------------------------------------------------------------------------------------------------------------------------------------------------------------------------------------------------------------------------------------------------------------------------------------------------------------------------------------------------------------------------------------------------------------------------------------------------------------------------------------------------------------------------------------------------------------------------------------------------------------------------------------------------------------------------------------------------------------------------------------------------------------------------------------------------------------------------------------------------------------------------------------------------------------------------------------------------------------------------------------------------------------------------------------------------------------------------------------------------------------------------------------------------------------------------------------------------------------------------------------------------------------------------------------------------------------------------------------------------------------------------------------------------------------------------------------------------------------------------------------------------------------------------------------------------------------------------------------------------------------------------------------------------------------------------------------------------------------------------------------------------------------------------------------------------------------------------------------------------------------------------------------------------------------------------------------------------------------------------------------------------------------------------------------------------------------------------------------------------------------------------------------------------------------------------------------------------------------------------------------------------------------------------------------------------------------------|

|                           |          |    |                                                                                                                                                                                                                                                                                                                                                                                                                                                                                                                                                                                                                                      |                                                   |                                                                                                                                                                                                                                                                                                                                                                                                                                                                                                                                                                                                                                                                                                                                                                                                                                                                                                                                                                                                                                                                                                                                                                                                                                                                                                                                                                                                                                                                                                                                                                                                                                                                                                                                                                                                                                                                                                                                                                                                                                                                                                                                                                                                                                                                                                                                                                                                                                                                                                                                                                                                                                                                                                                                                                                                                                                                                                                                                                                                                                                                                                                                                                                                                                                                                                                                                                                                                                                                                                                                                                                                                                                                                                                                                                                                                                                                                                                                                                                                                                                                                                                                                                                                                                                                                                                                                                                                                                                                                                                                                                                                                                                                                                                                                                                                                                                                                                                                                                                                                                                                                                                                                                                                                                                                                                                                                                                                                                                                                                                                                                                                                                                                                                                                                                                                                                                                                                                                                                                                                                                                                                                                                                                                                                                                                                                                                                                                                                                                                                                                                                                                                                                                                                                                                                                                                                                                                                                                                                                                                                      |
|---------------------------|----------|----|--------------------------------------------------------------------------------------------------------------------------------------------------------------------------------------------------------------------------------------------------------------------------------------------------------------------------------------------------------------------------------------------------------------------------------------------------------------------------------------------------------------------------------------------------------------------------------------------------------------------------------------|---------------------------------------------------|--------------------------------------------------------------------------------------------------------------------------------------------------------------------------------------------------------------------------------------------------------------------------------------------------------------------------------------------------------------------------------------------------------------------------------------------------------------------------------------------------------------------------------------------------------------------------------------------------------------------------------------------------------------------------------------------------------------------------------------------------------------------------------------------------------------------------------------------------------------------------------------------------------------------------------------------------------------------------------------------------------------------------------------------------------------------------------------------------------------------------------------------------------------------------------------------------------------------------------------------------------------------------------------------------------------------------------------------------------------------------------------------------------------------------------------------------------------------------------------------------------------------------------------------------------------------------------------------------------------------------------------------------------------------------------------------------------------------------------------------------------------------------------------------------------------------------------------------------------------------------------------------------------------------------------------------------------------------------------------------------------------------------------------------------------------------------------------------------------------------------------------------------------------------------------------------------------------------------------------------------------------------------------------------------------------------------------------------------------------------------------------------------------------------------------------------------------------------------------------------------------------------------------------------------------------------------------------------------------------------------------------------------------------------------------------------------------------------------------------------------------------------------------------------------------------------------------------------------------------------------------------------------------------------------------------------------------------------------------------------------------------------------------------------------------------------------------------------------------------------------------------------------------------------------------------------------------------------------------------------------------------------------------------------------------------------------------------------------------------------------------------------------------------------------------------------------------------------------------------------------------------------------------------------------------------------------------------------------------------------------------------------------------------------------------------------------------------------------------------------------------------------------------------------------------------------------------------------------------------------------------------------------------------------------------------------------------------------------------------------------------------------------------------------------------------------------------------------------------------------------------------------------------------------------------------------------------------------------------------------------------------------------------------------------------------------------------------------------------------------------------------------------------------------------------------------------------------------------------------------------------------------------------------------------------------------------------------------------------------------------------------------------------------------------------------------------------------------------------------------------------------------------------------------------------------------------------------------------------------------------------------------------------------------------------------------------------------------------------------------------------------------------------------------------------------------------------------------------------------------------------------------------------------------------------------------------------------------------------------------------------------------------------------------------------------------------------------------------------------------------------------------------------------------------------------------------------------------------------------------------------------------------------------------------------------------------------------------------------------------------------------------------------------------------------------------------------------------------------------------------------------------------------------------------------------------------------------------------------------------------------------------------------------------------------------------------------------------------------------------------------------------------------------------------------------------------------------------------------------------------------------------------------------------------------------------------------------------------------------------------------------------------------------------------------------------------------------------------------------------------------------------------------------------------------------------------------------------------------------------------------------------------------------------------------------------------------------------------------------------------------------------------------------------------------------------------------------------------------------------------------------------------------------------------------------------------------------------------------------------------------------------------------------------------------------------------------------------------------------------------------------------------------------|
| Pentose phosphate pathway | map00030 | 16 | <p>ec:2.7.1.90 - 1-phosphotransferase,<br/> ec:2.2.1.1 - glyceraldehyde transferase,<br/> ec:2.7.1.15 - deoxyribokinase, ec:2.7.1.11 - phosphohexokinase,<br/> ec:2.7.6.1 - diphosphokinase, ec:5.3.1.6 - isomerase, ec:5.3.1.9 - isomerase, ec:1.2.1.9 - dehydrogenase (NADP+),<br/> ec:4.1.2.13 - aldolase, ec:5.1.3.1 - 3-epimerase, ec:3.1.3.11 - hexose diphosphatase, ec:3.1.1.31 - phosphogluconolactonase, ec:1.1.1.44 - dehydrogenase (NADP+-dependent, decarboxylating),<br/> ec:1.1.1.49 - dehydrogenase (NADP+), ec:5.4.2.2 - (alpha-D-glucose-1,6-bisphosphate-dependent),<br/> ec:5.4.2.7 - phosphodeoxyribomutase</p> | 1, 24, 2, 5, 4, 2, 2, 9, 38, 3, 8, 2, 10, 6, 7, 1 | <p>vo_c2_Locus_6348_Transcript_1/2_Confidence_1.000_Length_3755, vo_c3_Locus_1314_Transcript_17/46_Confidence_0.365_Length_2530, vo_n3_Locus_387_Transcript_34/39_Confidence_0.386_Length_2514, vo_c2_Locus_924_Transcript_20/40_Confidence_0.452_Length_2520, vo_c2_Locus_924_Transcript_13/40_Confidence_0.310_Length_2559, vo_c3_Locus_1314_Transcript_33/46_Confidence_0.292_Length_2524, vo_c1_Locus_1204_Transcript_14/17_Confidence_0.394_Length_4476, vo_c2_Locus_924_Transcript_19/40_Confidence_0.333_Length_2562, vo_n1_Locus_327_Transcript_13/41_Confidence_0.275_Length_2480, vo_c3_Locus_1314_Transcript_6/46_Confidence_0.208_Length_1518, vo_n1_Locus_327_Transcript_40/41_Confidence_0.176_Length_2442, vo_c3_Locus_1314_Transcript_38/46_Confidence_0.302_Length_2522, vo_c2_Locus_924_Transcript_34/40_Confidence_0.369_Length_2618, vo_c3_Locus_1314_Transcript_14/46_Confidence_0.229_Length_3828, vo_c2_Locus_924_Transcript_16/40_Confidence_0.321_Length_2559, vo_c2_Locus_924_Transcript_23/40_Confidence_0.488_Length_2850, vo_c3_Locus_1314_Transcript_21/46_Confidence_0.365_Length_2524, vo_c1_Locus_1204_Transcript_13/17_Confidence_0.364_Length_4497, vo_n1_Locus_327_Transcript_24/41_Confidence_0.385_Length_2547, vo_c2_Locus_924_Transcript_17/40_Confidence_0.333_Length_2453, tri_c_comp20608_c0_seq4, tri_c_comp20608_c0_seq5, vo_c3_Locus_1314_Transcript_43/46_Confidence_0.198_Length_2519, vo_n2_Locus_2054_Transcript_26/37_Confidence_0.448_Length_2522, tri_c_comp20608_c0_seq7, vo_c1_Locus_36426_Transcript_3/5_Confidence_0.429_Length_2307, vo_c2_Locus_27773_Transcript_4/7_Confidence_0.545_Length_2350, vo_c3_Locus_1613_Transcript_6/17_Confidence_0.158_Length_5809, vo_n1_Locus_10193_Transcript_1/1_Confidence_0.000_Length_1647, vo_c2_Locus_6348_Transcript_1/2_Confidence_1.000_Length_3755, vo_n3_Locus_23556_Transcript_2/4_Confidence_0.500_Length_4210, tri_c_comp43537_c0_seq1, vo_c3_Locus_18398_Transcript_2/2_Confidence_0.000_Length_715, vo_n2_Locus_18825_Transcript_1/3_Confidence_0.500_Length_1632, tri_c_comp33638_c0_seq1, vo_n2_Locus_8943_Transcript_1/2_Confidence_0.750_Length_1351, vo_c1_Locus_34898_Transcript_1/1_Confidence_0.000_Length_1083, vo_n2_Locus_8097_Transcript_1/6_Confidence_0.500_Length_1196, vo_n2_Locus_11241_Transcript_1/3_Confidence_0.600_Length_3773, vo_c2_Locus_479_Transcript_1/2_Confidence_1.000_Length_2154, vo_c1_Locus_223_Transcript_52/65_Confidence_0.042_Length_799, vo_n2_Locus_13049_Transcript_20/20_Confidence_0.289_Length_1233, vo_c3_Locus_1015_Transcript_30/32_Confidence_0.181_Length_1172, vo_n2_Locus_13049_Transcript_19/20_Confidence_0.368_Length_1268, vo_n2_Locus_13049_Transcript_17/20_Confidence_0.342_Length_1329, vo_c3_Locus_1015_Transcript_9/32_Confidence_0.236_Length_1272, vo_n2_Locus_13049_Transcript_9/20_Confidence_0.316_Length_1224, vo_c3_Locus_1015_Transcript_13/32_Confidence_0.222_Length_1363, vo_n2_Locus_13049_Transcript_7/20_Confidence_0.421_Length_1354, vo_n1_Locus_565_Transcript_31/31_Confidence_0.178_Length_3922, vo_c3_Locus_2800_Transcript_3/23_Confidence_0.566_Length_1690, vo_c3_Locus_2800_Transcript_9/23_Confidence_0.585_Length_1396, tri_n_comp21653_c0_seq1, vo_n1_Locus_565_Transcript_5/31_Confidence_0.244_Length_1533, vo_n2_Locus_4661_Transcript_5/12_Confidence_0.208_Length_1240, vo_n1_Locus_565_Transcript_17/31_Confidence_0.422_Length_1454, vo_c3_Locus_2800_Transcript_5/23_Confidence_0.566_Length_2133, vo_c1_Locus_1757_Transcript_17/19_Confidence_0.375_Length_1367, vo_c1_Locus_298_Transcript_4/32_Confidence_0.255_Length_1585, vo_n1_Locus_8402_Transcript_3/4_Confidence_0.286_Length_1464, vo_c3_Locus_2800_Transcript_23/23_Confidence_0.151_Length_1466, vo_n2_Locus_903_Transcript_38/40_Confidence_0.222_Length_6612, vo_n1_Locus_565_Transcript_20/31_Confidence_0.444_Length_1622, vo_n2_Locus_2046_Transcript_7/18_Confidence_0.345_Length_1296, vo_c3_Locus_2800_Transcript_8/23_Confidence_0.585_Length_1344, vo_n3_Locus_1119_Transcript_19/50_Confidence_0.050_Length_498, vo_c2_Locus_5742_Transcript_10/21_Confidence_0.244_Length_1454, vo_n3_Locus_1119_Transcript_11/50_Confidence_0.124_Length_2839, vo_c2_Locus_5742_Transcript_18/21_Confidence_0.317_Length_2233, vo_n1_Locus_565_Transcript_13/31_Confidence_0.378_Length_1400, vo_c3_Locus_2800_Transcript_14/23_Confidence_0.321_Length_1426, vo_c3_Locus_614_Transcript_19/24_Confidence_0.394_Length_3443, vo_c2_Locus_358_Transcript_1/41_Confidence_0.080_Length_1708, vo_c2_Locus_5742_Transcript_14/21_Confidence_0.439_Length_2413, vo_c1_Locus_1757_Transcript_8/19_Confidence_0.458_Length_1460, vo_n1_Locus_986_Transcript_16/36_Confidence_0.211_Length_1811, vo_n1_Locus_565_Transcript_16/31_Confidence_0.400_Length_1499, vo_n2_Locus_903_Transcript_37/40_Confidence_0.346_Length_3926, tri_c_comp20312_c0_seq4, vo_c3_Locus_614_Transcript_13/24_Confidence_0.061_Length_4970, vo_n2_Locus_2046_Transcript_11/18_Confidence_0.310_Length_1666, vo_n2_Locus_903_Transcript_31/40_Confidence_0.321_Length_2251, vo_n1_Locus_565_Transcript_30/31_Confidence_0.422_Length_3814, vo_c3_Locus_614_Transcript_2/24_Confidence_0.485_Length_1777, vo_n1_Locus_5148_Transcript_1/4_Confidence_0.667_Length_1983, vo_c1_Locus_10454_Transcript_1/2_Confidence_0.750_Length_1441, vo_n3_Locus_1119_Transcript_18/50_Confidence_0.149_Length_1959, vo_n3_Locus_1573_Transcript_4/9_Confidence_0.364_Length_1074, vo_n2_Locus_3298_Transcript_6/11_Confidence_0.333_Length_1072, vo_n1_Locus_7783_Transcript_1/2_Confidence_0.667_Length_900, vo_c2_Locus_40594_Transcript_2/3_Confidence_0.500_Length_1728, vo_n2_Locus_39295_Transcript_2/2_Confidence_0.500_Length_1939, vo_c2_Locus_6460_Transcript_1/2_Confidence_1.000_Length_1563, vo_n1_Locus_3261_Transcript_3/4_Confidence_0.667_Length_1633, vo_n3_Locus_27_Transcript_1/1_Confidence_0.000_Length_1278, tri_c_comp23875_c0_seq1, tri_c_comp24147_c0_seq1, vo_c1_Locus_4576_Transcript_2/2_Confidence_0.000_Length_1644, vo_n2_Locus_1545_Transcript_1/1_Confidence_0.000_Length_1374, vo_c1_Locus_37991_Transcript_1/1_Confidence_0.000_Length_924, tri_n_comp18543_c0_seq8, vo_c2_Locus_14292_Transcript_1/3_Confidence_0.857_Length_1370, vo_n2_Locus_25571_Transcript_1/1_Confidence_0.000_Length_1103, tri_n_comp18543_c0_seq4, vo_c2_Locus_13495_Transcript_4/17_Confidence_0.346_Length_1808, tri_c_comp25671_c0_seq1, tri_n_comp49842_c0_seq1, vo_n2_Locus_6054_Transcript_2/13_Confidence_0.556_Length_2470, vo_c2_Locus_14292_Transcript_3/3_Confidence_0.429_Length_1343, vo_c3_Locus_5223_Transcript_5/7_Confidence_0.444_Length_5924, vo_c1_Locus_22469_Transcript_1/1_Confidence_0.000_Length_2691, vo_c1_Locus_2369_Transcript_1/3_Confidence_0.667_Length_1916, vo_n2_Locus_1545_Transcript_1/1_Confidence_0.000_Length_1374, vo_c1_Locus_2369_Transcript_2/3_Confidence_0.333_Length_2032, vo_c3_Locus_3736_Transcript_2/6_Confidence_0.571_Length_1920,</p> |
|---------------------------|----------|----|--------------------------------------------------------------------------------------------------------------------------------------------------------------------------------------------------------------------------------------------------------------------------------------------------------------------------------------------------------------------------------------------------------------------------------------------------------------------------------------------------------------------------------------------------------------------------------------------------------------------------------------|---------------------------------------------------|--------------------------------------------------------------------------------------------------------------------------------------------------------------------------------------------------------------------------------------------------------------------------------------------------------------------------------------------------------------------------------------------------------------------------------------------------------------------------------------------------------------------------------------------------------------------------------------------------------------------------------------------------------------------------------------------------------------------------------------------------------------------------------------------------------------------------------------------------------------------------------------------------------------------------------------------------------------------------------------------------------------------------------------------------------------------------------------------------------------------------------------------------------------------------------------------------------------------------------------------------------------------------------------------------------------------------------------------------------------------------------------------------------------------------------------------------------------------------------------------------------------------------------------------------------------------------------------------------------------------------------------------------------------------------------------------------------------------------------------------------------------------------------------------------------------------------------------------------------------------------------------------------------------------------------------------------------------------------------------------------------------------------------------------------------------------------------------------------------------------------------------------------------------------------------------------------------------------------------------------------------------------------------------------------------------------------------------------------------------------------------------------------------------------------------------------------------------------------------------------------------------------------------------------------------------------------------------------------------------------------------------------------------------------------------------------------------------------------------------------------------------------------------------------------------------------------------------------------------------------------------------------------------------------------------------------------------------------------------------------------------------------------------------------------------------------------------------------------------------------------------------------------------------------------------------------------------------------------------------------------------------------------------------------------------------------------------------------------------------------------------------------------------------------------------------------------------------------------------------------------------------------------------------------------------------------------------------------------------------------------------------------------------------------------------------------------------------------------------------------------------------------------------------------------------------------------------------------------------------------------------------------------------------------------------------------------------------------------------------------------------------------------------------------------------------------------------------------------------------------------------------------------------------------------------------------------------------------------------------------------------------------------------------------------------------------------------------------------------------------------------------------------------------------------------------------------------------------------------------------------------------------------------------------------------------------------------------------------------------------------------------------------------------------------------------------------------------------------------------------------------------------------------------------------------------------------------------------------------------------------------------------------------------------------------------------------------------------------------------------------------------------------------------------------------------------------------------------------------------------------------------------------------------------------------------------------------------------------------------------------------------------------------------------------------------------------------------------------------------------------------------------------------------------------------------------------------------------------------------------------------------------------------------------------------------------------------------------------------------------------------------------------------------------------------------------------------------------------------------------------------------------------------------------------------------------------------------------------------------------------------------------------------------------------------------------------------------------------------------------------------------------------------------------------------------------------------------------------------------------------------------------------------------------------------------------------------------------------------------------------------------------------------------------------------------------------------------------------------------------------------------------------------------------------------------------------------------------------------------------------------------------------------------------------------------------------------------------------------------------------------------------------------------------------------------------------------------------------------------------------------------------------------------------------------------------------------------------------------------------------------------------------------------------------------------------------------------------------------------------------------------------------------------|

|  |  |  |  |  |                                                                                                                                                                                                                                                                                                                                                                                                                                                                                                                                                                  |
|--|--|--|--|--|------------------------------------------------------------------------------------------------------------------------------------------------------------------------------------------------------------------------------------------------------------------------------------------------------------------------------------------------------------------------------------------------------------------------------------------------------------------------------------------------------------------------------------------------------------------|
|  |  |  |  |  | <p>vo_c3_Locus_3736_Transcript_4/6_Confidence_0.286_Length_917, tri_n_comp18813_c0_seq13,<br/>vo_c2_Locus_23037_Transcript_2/2_Confidence_0.000_Length_2109, vo_n3_Locus_362_Transcript_3/4_Confidence_0.364_Length_3895,<br/>vo_n3_Locus_362_Transcript_1/4_Confidence_0.727_Length_3306, vo_n1_Locus_5208_Transcript_2/2_Confidence_0.000_Length_2077,<br/>vo_c2_Locus_23037_Transcript_1/2_Confidence_0.750_Length_1965, vo_n3_Locus_15336_Transcript_1/1_Confidence_0.000_Length_1810,<br/>vo_c2_Locus_23037_Transcript_1/2_Confidence_0.750_Length_1965</p> |
|--|--|--|--|--|------------------------------------------------------------------------------------------------------------------------------------------------------------------------------------------------------------------------------------------------------------------------------------------------------------------------------------------------------------------------------------------------------------------------------------------------------------------------------------------------------------------------------------------------------------------|

|                           |          |    |                                                                                                                                                                                                                                                                                                                                                                                                                                                                                                                                               |                                                             |                                                                                                                                                                                                                                                                                                                                                                                                                                                                                                                                                                                                                                                                                                                                                                                                                                                                                                                                                                                                                                                                                                                                                                                                                                                                                                                                                                                                                                                                                                                                                                                                                                                                                                                                                                                                                                                                                                                                                                                                                                                                                                                                                                                                                                                                                                                                                                                                                                                                                                                                                                                                                                                                                                                                                                                                                                                                                                                                                                                                                                                                                                                                                                                                                                                                                                                                                                                                                                                                                                                                                                                                                                                                                                                                                                                                                                                                                                                                                                                                                                                                                                                                                                                                                                                                                                                                                                                                                                                                                                                                                                                                                                                                                                                                                                                                                                                                                                                                                                                                                                                                                                                                                                                                                                                                                                                                                                                                                                                                                                                                                                                                                                                                                                                                                                                                                                                                                                                                                                                                                                                                                                                                                                                                                                                                                                                                                                                                                                                                                                                                                                                                                                                                                                                                                                                                                                                                                                                                                                                                                                                                                                                 |
|---------------------------|----------|----|-----------------------------------------------------------------------------------------------------------------------------------------------------------------------------------------------------------------------------------------------------------------------------------------------------------------------------------------------------------------------------------------------------------------------------------------------------------------------------------------------------------------------------------------------|-------------------------------------------------------------|-----------------------------------------------------------------------------------------------------------------------------------------------------------------------------------------------------------------------------------------------------------------------------------------------------------------------------------------------------------------------------------------------------------------------------------------------------------------------------------------------------------------------------------------------------------------------------------------------------------------------------------------------------------------------------------------------------------------------------------------------------------------------------------------------------------------------------------------------------------------------------------------------------------------------------------------------------------------------------------------------------------------------------------------------------------------------------------------------------------------------------------------------------------------------------------------------------------------------------------------------------------------------------------------------------------------------------------------------------------------------------------------------------------------------------------------------------------------------------------------------------------------------------------------------------------------------------------------------------------------------------------------------------------------------------------------------------------------------------------------------------------------------------------------------------------------------------------------------------------------------------------------------------------------------------------------------------------------------------------------------------------------------------------------------------------------------------------------------------------------------------------------------------------------------------------------------------------------------------------------------------------------------------------------------------------------------------------------------------------------------------------------------------------------------------------------------------------------------------------------------------------------------------------------------------------------------------------------------------------------------------------------------------------------------------------------------------------------------------------------------------------------------------------------------------------------------------------------------------------------------------------------------------------------------------------------------------------------------------------------------------------------------------------------------------------------------------------------------------------------------------------------------------------------------------------------------------------------------------------------------------------------------------------------------------------------------------------------------------------------------------------------------------------------------------------------------------------------------------------------------------------------------------------------------------------------------------------------------------------------------------------------------------------------------------------------------------------------------------------------------------------------------------------------------------------------------------------------------------------------------------------------------------------------------------------------------------------------------------------------------------------------------------------------------------------------------------------------------------------------------------------------------------------------------------------------------------------------------------------------------------------------------------------------------------------------------------------------------------------------------------------------------------------------------------------------------------------------------------------------------------------------------------------------------------------------------------------------------------------------------------------------------------------------------------------------------------------------------------------------------------------------------------------------------------------------------------------------------------------------------------------------------------------------------------------------------------------------------------------------------------------------------------------------------------------------------------------------------------------------------------------------------------------------------------------------------------------------------------------------------------------------------------------------------------------------------------------------------------------------------------------------------------------------------------------------------------------------------------------------------------------------------------------------------------------------------------------------------------------------------------------------------------------------------------------------------------------------------------------------------------------------------------------------------------------------------------------------------------------------------------------------------------------------------------------------------------------------------------------------------------------------------------------------------------------------------------------------------------------------------------------------------------------------------------------------------------------------------------------------------------------------------------------------------------------------------------------------------------------------------------------------------------------------------------------------------------------------------------------------------------------------------------------------------------------------------------------------------------------------------------------------------------------------------------------------------------------------------------------------------------------------------------------------------------------------------------------------------------------------------------------------------------------------------------------------------------------------------------------------------------------------------------------------------------------------------------------------------------------------|
| Citrate cycle (TCA cycle) | map00020 | 16 | <p>ec:6.4.1.1 - carboxylase, ec:4.1.1.49 - carboxykinase (ATP), ec:1.3.5.1 - dehydrogenase, ec:4.1.1.32 - carboxykinase (GTP), ec:6.2.1.5 - ligase (ADP-forming), ec:6.2.1.4 - ligase (GDP-forming), ec:1.8.1.4 - dehydrogenase, ec:1.1.5.4 - dehydrogenase (quinone), ec:2.3.3.8 - citrate synthase, ec:2.3.3.1 - (Si)-synthase, ec:2.3.1.61 - succinyltransferase, ec:4.2.1.3 - hydratase, ec:4.2.1.2 - hydratase, ec:1.1.1.37 - dehydrogenase, ec:1.1.1.42 - dehydrogenase (NADP+), ec:1.2.4.2 - dehydrogenase (succinyl-transferring)</p> | <p>1, 5, 11, 5, 28, 6, 2, 3, 11, 11, 3, 8, 2, 24, 10, 2</p> | <p>vo_n2_Locus_15097_Transcript_1/1_Confidence_0.000_Length_3935, vo_c1_Locus_2295_Transcript_9/10_Confidence_0.238_Length_2213, vo_c2_Locus_2862_Transcript_9/10_Confidence_0.250_Length_2209, vo_c1_Locus_2295_Transcript_3/10_Confidence_0.524_Length_2330, vo_n2_Locus_1690_Transcript_8/11_Confidence_0.429_Length_2234, vo_n2_Locus_1690_Transcript_9/11_Confidence_0.429_Length_2277, vo_n2_Locus_5500_Transcript_5/5_Confidence_0.308_Length_1268, vo_n2_Locus_5500_Transcript_1/5_Confidence_0.308_Length_1100, tri_n_comp12494_c0_seq1, vo_n2_Locus_5500_Transcript_2/5_Confidence_0.538_Length_1312, vo_n2_Locus_2182_Transcript_14/15_Confidence_0.458_Length_3129, vo_c2_Locus_642_Transcript_3/10_Confidence_0.571_Length_2141, vo_n1_Locus_1508_Transcript_4/6_Confidence_0.429_Length_1979, vo_n1_Locus_2259_Transcript_6/13_Confidence_0.429_Length_1275, vo_n1_Locus_2259_Transcript_9/13_Confidence_0.429_Length_1314, vo_c1_Locus_1462_Transcript_1/46_Confidence_0.182_Length_2129, vo_c1_Locus_1462_Transcript_8/46_Confidence_0.530_Length_9104, vo_c1_Locus_2295_Transcript_9/10_Confidence_0.238_Length_2213, vo_c2_Locus_2862_Transcript_9/10_Confidence_0.250_Length_2209, vo_c1_Locus_2295_Transcript_3/10_Confidence_0.524_Length_2330, vo_n2_Locus_1690_Transcript_8/11_Confidence_0.429_Length_2234, vo_n2_Locus_1690_Transcript_9/11_Confidence_0.429_Length_2277, vo_c1_Locus_2207_Transcript_20/51_Confidence_0.393_Length_3556, vo_c3_Locus_2283_Transcript_28/38_Confidence_0.331_Length_3501, vo_n3_Locus_1164_Transcript_30/46_Confidence_0.400_Length_3745, tri_c_comp20184_c0_seq2, vo_c2_Locus_7270_Transcript_1/1_Confidence_0.500_Length_1488, vo_c1_Locus_31_Transcript_859/1155_Confidence_0.002_Length_1257, vo_n3_Locus_1164_Transcript_32/46_Confidence_0.456_Length_3745, vo_n1_Locus_3448_Transcript_46/64_Confidence_0.085_Length_783, vo_c2_Locus_644_Transcript_12/40_Confidence_0.459_Length_3665, vo_n3_Locus_1164_Transcript_35/46_Confidence_0.511_Length_3745, vo_c3_Locus_5_Transcript_229/353_Confidence_0.004_Length_952, vo_c2_Locus_644_Transcript_3/40_Confidence_0.071_Length_957, vo_n1_Locus_3448_Transcript_53/64_Confidence_0.225_Length_3567, vo_n2_Locus_386_Transcript_32/33_Confidence_0.208_Length_3664, vo_n1_Locus_3448_Transcript_63/64_Confidence_0.318_Length_3637, vo_n3_Locus_1164_Transcript_33/46_Confidence_0.456_Length_3748, vo_c3_Locus_2283_Transcript_26/38_Confidence_0.285_Length_3501, vo_n2_Locus_386_Transcript_22/33_Confidence_0.376_Length_3568, vo_c3_Locus_2283_Transcript_29/38_Confidence_0.292_Length_3501, vo_n2_Locus_386_Transcript_1/33_Confidence_0.139_Length_3600, vo_c2_Locus_644_Transcript_24/40_Confidence_0.398_Length_3511, vo_n3_Locus_1164_Transcript_43/46_Confidence_0.389_Length_3338, vo_c1_Locus_2207_Transcript_39/51_Confidence_0.250_Length_3586, vo_c3_Locus_79_Transcript_1/3_Confidence_0.200_Length_5222, vo_c2_Locus_52_Transcript_234/466_Confidence_0.003_Length_1462, vo_n2_Locus_386_Transcript_10/33_Confidence_0.376_Length_3676, vo_n1_Locus_1394_Transcript_2/3_Confidence_0.400_Length_2232, tri_n_comp19507_c0_seq6, vo_c3_Locus_79_Transcript_1/3_Confidence_0.200_Length_5222, vo_n1_Locus_1394_Transcript_2/3_Confidence_0.400_Length_2232, vo_n2_Locus_2182_Transcript_14/15_Confidence_0.458_Length_3129, vo_c1_Locus_1462_Transcript_1/46_Confidence_0.182_Length_2129, vo_c1_Locus_1462_Transcript_8/46_Confidence_0.530_Length_9104, vo_c2_Locus_642_Transcript_3/10_Confidence_0.571_Length_2141, vo_n3_Locus_6810_Transcript_2/3_Confidence_0.913_Length_1699, vo_n1_Locus_6460_Transcript_1/1_Confidence_0.000_Length_1912, vo_n1_Locus_833_Transcript_2/6_Confidence_0.333_Length_2200, vo_n2_Locus_3042_Transcript_2/3_Confidence_0.750_Length_2030, vo_c1_Locus_6244_Transcript_1/2_Confidence_0.750_Length_1731, vo_c1_Locus_2207_Transcript_20/51_Confidence_0.393_Length_3556, vo_c3_Locus_2283_Transcript_28/38_Confidence_0.331_Length_3501, vo_n3_Locus_1164_Transcript_30/46_Confidence_0.400_Length_3745, tri_c_comp20184_c0_seq2, vo_n3_Locus_1164_Transcript_32/46_Confidence_0.456_Length_3745, vo_n1_Locus_3448_Transcript_1/64_Confidence_0.062_Length_478, vo_n1_Locus_3448_Transcript_46/64_Confidence_0.085_Length_783, vo_c2_Locus_644_Transcript_12/40_Confidence_0.459_Length_3665, vo_n3_Locus_1164_Transcript_35/46_Confidence_0.511_Length_3745, vo_c2_Locus_644_Transcript_3/40_Confidence_0.071_Length_957, vo_n1_Locus_3448_Transcript_53/64_Confidence_0.225_Length_3567, vo_n2_Locus_386_Transcript_32/33_Confidence_0.208_Length_3664, vo_n1_Locus_3448_Transcript_63/64_Confidence_0.318_Length_3637, vo_n3_Locus_1164_Transcript_33/46_Confidence_0.456_Length_3748, vo_c3_Locus_2283_Transcript_26/38_Confidence_0.285_Length_3501, vo_n2_Locus_386_Transcript_22/33_Confidence_0.376_Length_3568, vo_n1_Locus_3448_Transcript_2/64_Confidence_0.054_Length_402, vo_c3_Locus_2283_Transcript_29/38_Confidence_0.292_Length_3501, vo_c3_Locus_2283_Transcript_35/38_Confidence_0.400_Length_3582, vo_n2_Locus_386_Transcript_1/33_Confidence_0.139_Length_3600, vo_c2_Locus_644_Transcript_24/40_Confidence_0.398_Length_3511, vo_n3_Locus_1164_Transcript_43/46_Confidence_0.389_Length_3338, vo_c1_Locus_2207_Transcript_39/51_Confidence_0.250_Length_3586, vo_c3_Locus_79_Transcript_1/3_Confidence_0.200_Length_5222, vo_n2_Locus_386_Transcript_10/33_Confidence_0.376_Length_3676, vo_n1_Locus_1394_Transcript_2/3_Confidence_0.400_Length_2232, vo_c2_Locus_644_Transcript_6/40_Confidence_0.204_Length_3616, vo_c1_Locus_2207_Transcript_36/51_Confidence_0.402_Length_3407, vo_n2_Locus_386_Transcript_5/33_Confidence_0.040_Length_566, tri_n_comp19507_c0_seq6, vo_n1_Locus_3448_Transcript_55/64_Confidence_0.233_Length_3564, vo_c3_Locus_4005_Transcript_5/6_Confidence_0.167_Length_1517, vo_c1_Locus_6811_Transcript_7/8_Confidence_0.364_Length_589, vo_n2_Locus_297_Transcript_2/5_Confidence_0.636_Length_1679, vo_c2_Locus_1080_Transcript_4/21_Confidence_0.241_Length_1741, vo_c2_Locus_1080_Transcript_3/21_Confidence_0.207_Length_1702, vo_n3_Locus_1253_Transcript_1/2_Confidence_0.500_Length_1626, vo_c2_Locus_1080_Transcript_8/21_Confidence_0.138_Length_1077, vo_c2_Locus_4581_Transcript_3/8_Confidence_0.684_Length_1578, vo_n2_Locus_901_Transcript_1/95_Confidence_0.023_Length_1512, vo_n2_Locus_20307_Transcript_6/7_Confidence_0.062_Length_2030, vo_n3_Locus_1253_Transcript_2/2_Confidence_0.000_Length_1587, vo_n2_Locus_3821_Transcript_2/4_Confidence_0.750_Length_1813, tri_c_comp16609_c0_seq3, vo_c3_Locus_278_Transcript_151/322_Confidence_0.010_Length_2531, tri_n_comp15079_c0_seq3, vo_c1_Locus_2380_Transcript_17/17_Confidence_0.086_Length_3951, vo_c2_Locus_191_Transcript_2/2_Confidence_0.167_Length_3106, vo_c1_Locus_2380_Transcript_3/17_Confidence_0.371_Length_12857, tri_c_comp21028_c0_seq2, tri_c_comp21028_c0_seq3, vo_c2_Locus_354_Transcript_3/17_Confidence_0.667_Length_4966, vo_n1_Locus_30469_Transcript_2/2_Confidence_0.000_Length_979,</p> |
|---------------------------|----------|----|-----------------------------------------------------------------------------------------------------------------------------------------------------------------------------------------------------------------------------------------------------------------------------------------------------------------------------------------------------------------------------------------------------------------------------------------------------------------------------------------------------------------------------------------------|-------------------------------------------------------------|-----------------------------------------------------------------------------------------------------------------------------------------------------------------------------------------------------------------------------------------------------------------------------------------------------------------------------------------------------------------------------------------------------------------------------------------------------------------------------------------------------------------------------------------------------------------------------------------------------------------------------------------------------------------------------------------------------------------------------------------------------------------------------------------------------------------------------------------------------------------------------------------------------------------------------------------------------------------------------------------------------------------------------------------------------------------------------------------------------------------------------------------------------------------------------------------------------------------------------------------------------------------------------------------------------------------------------------------------------------------------------------------------------------------------------------------------------------------------------------------------------------------------------------------------------------------------------------------------------------------------------------------------------------------------------------------------------------------------------------------------------------------------------------------------------------------------------------------------------------------------------------------------------------------------------------------------------------------------------------------------------------------------------------------------------------------------------------------------------------------------------------------------------------------------------------------------------------------------------------------------------------------------------------------------------------------------------------------------------------------------------------------------------------------------------------------------------------------------------------------------------------------------------------------------------------------------------------------------------------------------------------------------------------------------------------------------------------------------------------------------------------------------------------------------------------------------------------------------------------------------------------------------------------------------------------------------------------------------------------------------------------------------------------------------------------------------------------------------------------------------------------------------------------------------------------------------------------------------------------------------------------------------------------------------------------------------------------------------------------------------------------------------------------------------------------------------------------------------------------------------------------------------------------------------------------------------------------------------------------------------------------------------------------------------------------------------------------------------------------------------------------------------------------------------------------------------------------------------------------------------------------------------------------------------------------------------------------------------------------------------------------------------------------------------------------------------------------------------------------------------------------------------------------------------------------------------------------------------------------------------------------------------------------------------------------------------------------------------------------------------------------------------------------------------------------------------------------------------------------------------------------------------------------------------------------------------------------------------------------------------------------------------------------------------------------------------------------------------------------------------------------------------------------------------------------------------------------------------------------------------------------------------------------------------------------------------------------------------------------------------------------------------------------------------------------------------------------------------------------------------------------------------------------------------------------------------------------------------------------------------------------------------------------------------------------------------------------------------------------------------------------------------------------------------------------------------------------------------------------------------------------------------------------------------------------------------------------------------------------------------------------------------------------------------------------------------------------------------------------------------------------------------------------------------------------------------------------------------------------------------------------------------------------------------------------------------------------------------------------------------------------------------------------------------------------------------------------------------------------------------------------------------------------------------------------------------------------------------------------------------------------------------------------------------------------------------------------------------------------------------------------------------------------------------------------------------------------------------------------------------------------------------------------------------------------------------------------------------------------------------------------------------------------------------------------------------------------------------------------------------------------------------------------------------------------------------------------------------------------------------------------------------------------------------------------------------------------------------------------------------------------------------------------------------------------------------------------------------------------------|

|  |  |  |  |  |                                                                                                                                                                                                                                                                                                                                                                                                                                                                                                                                                                                                                                                                                                                                                                                                                                                                                                                                                                                                                                                                                                                                                                                                                                                                                                                                                                                                                                                                                                                                                                                                                                                                                                                                                                                                                                                                                                                                                                                                                                                                                                                                                                                                                                                                                                                                                                                                                                                                                       |
|--|--|--|--|--|---------------------------------------------------------------------------------------------------------------------------------------------------------------------------------------------------------------------------------------------------------------------------------------------------------------------------------------------------------------------------------------------------------------------------------------------------------------------------------------------------------------------------------------------------------------------------------------------------------------------------------------------------------------------------------------------------------------------------------------------------------------------------------------------------------------------------------------------------------------------------------------------------------------------------------------------------------------------------------------------------------------------------------------------------------------------------------------------------------------------------------------------------------------------------------------------------------------------------------------------------------------------------------------------------------------------------------------------------------------------------------------------------------------------------------------------------------------------------------------------------------------------------------------------------------------------------------------------------------------------------------------------------------------------------------------------------------------------------------------------------------------------------------------------------------------------------------------------------------------------------------------------------------------------------------------------------------------------------------------------------------------------------------------------------------------------------------------------------------------------------------------------------------------------------------------------------------------------------------------------------------------------------------------------------------------------------------------------------------------------------------------------------------------------------------------------------------------------------------------|
|  |  |  |  |  | <p>tri_n_comp8247_c0_seq2, vo_c3_Locus_1133_Transcript_4/9_Confidence_0.455_Length_1666,<br/>vo_c3_Locus_1723_Transcript_29/37_Confidence_0.411_Length_1695, vo_n2_Locus_330_Transcript_25/38_Confidence_0.361_Length_1516,<br/>vo_c3_Locus_1723_Transcript_35/37_Confidence_0.464_Length_1702, vo_c1_Locus_15206_Transcript_3/3_Confidence_0.000_Length_1312,<br/>vo_c1_Locus_7371_Transcript_4/4_Confidence_0.600_Length_1352, vo_c3_Locus_1723_Transcript_37/37_Confidence_0.214_Length_1530,<br/>vo_n1_Locus_769_Transcript_28/41_Confidence_0.400_Length_1609, vo_n1_Locus_769_Transcript_9/41_Confidence_0.460_Length_1494,<br/>vo_c3_Locus_2965_Transcript_2/2_Confidence_0.250_Length_1327, vo_n2_Locus_330_Transcript_5/38_Confidence_0.328_Length_11715,<br/>vo_n1_Locus_9772_Transcript_1/2_Confidence_0.333_Length_1224, vo_c1_Locus_3603_Transcript_44/48_Confidence_0.492_Length_1696,<br/>vo_c2_Locus_4242_Transcript_2/3_Confidence_0.400_Length_1168, vo_n1_Locus_6649_Transcript_2/3_Confidence_0.500_Length_2124,<br/>vo_c1_Locus_7371_Transcript_1/4_Confidence_0.500_Length_1352, vo_n3_Locus_2381_Transcript_2/3_Confidence_0.500_Length_1330,<br/>vo_c3_Locus_1723_Transcript_16/37_Confidence_0.286_Length_1491, vo_n1_Locus_769_Transcript_36/41_Confidence_0.420_Length_1536,<br/>vo_n1_Locus_769_Transcript_40/41_Confidence_0.320_Length_1479, vo_n1_Locus_6649_Transcript_1/3_Confidence_0.750_Length_1883,<br/>vo_c1_Locus_3603_Transcript_26/48_Confidence_0.400_Length_1432, vo_n1_Locus_5348_Transcript_2/2_Confidence_0.200_Length_1608,<br/>vo_n3_Locus_3383_Transcript_35/37_Confidence_0.389_Length_1512, tri_c_comp20802_c0_seq1,<br/>vo_c3_Locus_6304_Transcript_1/17_Confidence_0.159_Length_2915, vo_n2_Locus_353_Transcript_7/18_Confidence_0.420_Length_2960,<br/>vo_c1_Locus_5705_Transcript_18/19_Confidence_0.191_Length_3822, vo_n2_Locus_353_Transcript_14/18_Confidence_0.280_Length_2879,<br/>vo_n1_Locus_2903_Transcript_2/3_Confidence_0.400_Length_1386, vo_n1_Locus_464_Transcript_11/22_Confidence_0.362_Length_3670,<br/>vo_c2_Locus_11026_Transcript_2/2_Confidence_0.000_Length_1965, vo_c3_Locus_6304_Transcript_5/17_Confidence_0.477_Length_2995,<br/>vo_c1_Locus_5705_Transcript_16/19_Confidence_0.489_Length_4193, vo_c3_Locus_6304_Transcript_2/17_Confidence_0.523_Length_3712,<br/>vo_n2_Locus_3831_Transcript_3/5_Confidence_0.286_Length_3559, vo_c2_Locus_13441_Transcript_1/2_Confidence_0.333_Length_3397</p> |
|--|--|--|--|--|---------------------------------------------------------------------------------------------------------------------------------------------------------------------------------------------------------------------------------------------------------------------------------------------------------------------------------------------------------------------------------------------------------------------------------------------------------------------------------------------------------------------------------------------------------------------------------------------------------------------------------------------------------------------------------------------------------------------------------------------------------------------------------------------------------------------------------------------------------------------------------------------------------------------------------------------------------------------------------------------------------------------------------------------------------------------------------------------------------------------------------------------------------------------------------------------------------------------------------------------------------------------------------------------------------------------------------------------------------------------------------------------------------------------------------------------------------------------------------------------------------------------------------------------------------------------------------------------------------------------------------------------------------------------------------------------------------------------------------------------------------------------------------------------------------------------------------------------------------------------------------------------------------------------------------------------------------------------------------------------------------------------------------------------------------------------------------------------------------------------------------------------------------------------------------------------------------------------------------------------------------------------------------------------------------------------------------------------------------------------------------------------------------------------------------------------------------------------------------------|

|                        |          |    |                                                                                                                                                                                                                                                                                                                                                                                                                                                                                                                                                                                    |                                                       |                                                                                                                                                                                                                                                                                                                                                                                                                                                                                                                                                                                                                                                                                                                                                                                                                                                                                                                                                                                                                                                                                                                                                                                                                                                                                                                                                                                                                                                                                                                                                                                                                                                                                                                                                                                                                                                                                                                                                                                                                                                                                                                                                                                                                                                                                                                                                                                                                                                                                                                                                                                                                                                                                                                                                                                                                                                                                                                                                                                                                                                                                                                                                                                                                                                                                                                                                                                                                                                                                                                                                                                                                                                                                                                                                                                                                                                                                                                                                                                                                                                                                                                                                                                                                                                                                                                                                                                                                                                                                                                                                                                                                                                                                                                                                                                                                                                                                                                                                                                                                                                                                                                                                                                                                                                                                                                                                                                                                                                                                                                                                                                                                                                                                                                                                                                                                                                                                                                                                                                                                                                                                                                                                                                                                                                                                                                                                                                                                                                                                                                                                                                                                                                                                                                                                                                                                                                                                                                                                  |
|------------------------|----------|----|------------------------------------------------------------------------------------------------------------------------------------------------------------------------------------------------------------------------------------------------------------------------------------------------------------------------------------------------------------------------------------------------------------------------------------------------------------------------------------------------------------------------------------------------------------------------------------|-------------------------------------------------------|--------------------------------------------------------------------------------------------------------------------------------------------------------------------------------------------------------------------------------------------------------------------------------------------------------------------------------------------------------------------------------------------------------------------------------------------------------------------------------------------------------------------------------------------------------------------------------------------------------------------------------------------------------------------------------------------------------------------------------------------------------------------------------------------------------------------------------------------------------------------------------------------------------------------------------------------------------------------------------------------------------------------------------------------------------------------------------------------------------------------------------------------------------------------------------------------------------------------------------------------------------------------------------------------------------------------------------------------------------------------------------------------------------------------------------------------------------------------------------------------------------------------------------------------------------------------------------------------------------------------------------------------------------------------------------------------------------------------------------------------------------------------------------------------------------------------------------------------------------------------------------------------------------------------------------------------------------------------------------------------------------------------------------------------------------------------------------------------------------------------------------------------------------------------------------------------------------------------------------------------------------------------------------------------------------------------------------------------------------------------------------------------------------------------------------------------------------------------------------------------------------------------------------------------------------------------------------------------------------------------------------------------------------------------------------------------------------------------------------------------------------------------------------------------------------------------------------------------------------------------------------------------------------------------------------------------------------------------------------------------------------------------------------------------------------------------------------------------------------------------------------------------------------------------------------------------------------------------------------------------------------------------------------------------------------------------------------------------------------------------------------------------------------------------------------------------------------------------------------------------------------------------------------------------------------------------------------------------------------------------------------------------------------------------------------------------------------------------------------------------------------------------------------------------------------------------------------------------------------------------------------------------------------------------------------------------------------------------------------------------------------------------------------------------------------------------------------------------------------------------------------------------------------------------------------------------------------------------------------------------------------------------------------------------------------------------------------------------------------------------------------------------------------------------------------------------------------------------------------------------------------------------------------------------------------------------------------------------------------------------------------------------------------------------------------------------------------------------------------------------------------------------------------------------------------------------------------------------------------------------------------------------------------------------------------------------------------------------------------------------------------------------------------------------------------------------------------------------------------------------------------------------------------------------------------------------------------------------------------------------------------------------------------------------------------------------------------------------------------------------------------------------------------------------------------------------------------------------------------------------------------------------------------------------------------------------------------------------------------------------------------------------------------------------------------------------------------------------------------------------------------------------------------------------------------------------------------------------------------------------------------------------------------------------------------------------------------------------------------------------------------------------------------------------------------------------------------------------------------------------------------------------------------------------------------------------------------------------------------------------------------------------------------------------------------------------------------------------------------------------------------------------------------------------------------------------------------------------------------------------------------------------------------------------------------------------------------------------------------------------------------------------------------------------------------------------------------------------------------------------------------------------------------------------------------------------------------------------------------------------------------------------------------------------------------------------------|
| Glutathione metabolism | map00480 | 16 | <p>ec:2.5.1.16 - synthase,<br/> ec:2.5.1.18 - transferase,<br/> ec:2.5.1.22 - synthase,<br/> ec:4.1.1.17 - decarboxylase,<br/> ec:1.8.1.7 - reductase,<br/> ec:1.11.1.9 - peroxidase,<br/> ec:1.17.4.1 - reductase,<br/> ec:6.3.2.3 - synthase,<br/> ec:6.3.2.2 - ligase, ec:1.8.5.1 - dehydrogenase (ascorbate), ec:1.1.1.44 - dehydrogenase (NADP+-dependent, decarboxylating), ec:1.1.1.42 - dehydrogenase (NADP+), ec:2.3.2.2 - glutamyl transpeptidase, ec:1.1.1.49 - dehydrogenase (NADP+), ec:1.11.1.12 - glutathione peroxidase, ec:1.11.1.15 - thioredoxin peroxidase</p> | 1, 11, 2, 1, 18, 13, 32, 1, 5, 1, 10, 10, 1, 6, 1, 14 | <p>vo_c2_Locus_25147_Transcript_1/2_Confidence_0.333_Length_1097, vo_c3_Locus_7919_Transcript_7/13_Confidence_0.524_Length_1057, vo_c3_Locus_483_Transcript_11/12_Confidence_0.217_Length_759, vo_c2_Locus_8227_Transcript_3/3_Confidence_0.143_Length_1106, vo_c2_Locus_8227_Transcript_2/3_Confidence_0.571_Length_1060, vo_n2_Locus_34681_Transcript_5/6_Confidence_0.077_Length_2256, vo_c1_Locus_15275_Transcript_1/2_Confidence_0.333_Length_968, vo_n2_Locus_8358_Transcript_1/8_Confidence_0.444_Length_1513, vo_n2_Locus_2232_Transcript_6/7_Confidence_0.455_Length_2038, vo_c2_Locus_1790_Transcript_5/10_Confidence_0.474_Length_1047, vo_n2_Locus_8358_Transcript_6/8_Confidence_0.389_Length_1051, tri_n_comp38105_c0_seq1, vo_c2_Locus_25147_Transcript_1/2_Confidence_0.333_Length_1097, tri_c_comp23701_c0_seq1, vo_n1_Locus_24_Transcript_2/4_Confidence_0.667_Length_1878, vo_n2_Locus_10545_Transcript_1/1_Confidence_0.000_Length_1731, vo_c2_Locus_5797_Transcript_1/2_Confidence_0.400_Length_1712, vo_n1_Locus_23402_Transcript_3/3_Confidence_0.000_Length_1071, vo_c2_Locus_21654_Transcript_2/4_Confidence_0.500_Length_1715, vo_n3_Locus_1380_Transcript_5/6_Confidence_0.273_Length_1217, vo_n3_Locus_4780_Transcript_1/1_Confidence_0.000_Length_1276, vo_c2_Locus_6794_Transcript_18/19_Confidence_0.031_Length_2437, vo_n2_Locus_12693_Transcript_1/1_Confidence_0.000_Length_2082, vo_c1_Locus_8243_Transcript_1/1_Confidence_0.000_Length_849, vo_n1_Locus_471_Transcript_16/17_Confidence_0.065_Length_2412, tri_n_comp41310_c0_seq1, vo_c3_Locus_1735_Transcript_2/3_Confidence_0.333_Length_8270, vo_n2_Locus_3_Transcript_23780/24291_Confidence_0.000_Length_2094, vo_c2_Locus_9268_Transcript_2/5_Confidence_0.500_Length_8293, vo_n2_Locus_6286_Transcript_1/1_Confidence_0.000_Length_1634, vo_c2_Locus_2829_Transcript_4/21_Confidence_0.026_Length_813, vo_n1_Locus_471_Transcript_9/17_Confidence_0.387_Length_2658, vo_c1_Locus_1033_Transcript_1/1_Confidence_0.000_Length_1983, vo_n2_Locus_1609_Transcript_3/3_Confidence_0.000_Length_489, vo_n3_Locus_21278_Transcript_2/2_Confidence_0.250_Length_899, vo_c3_Locus_7729_Transcript_4/5_Confidence_0.167_Length_5654, vo_c1_Locus_15275_Transcript_1/2_Confidence_0.333_Length_968, vo_n2_Locus_23060_Transcript_2/2_Confidence_0.000_Length_889, vo_n1_Locus_4880_Transcript_4/6_Confidence_0.333_Length_1109, vo_n1_Locus_4880_Transcript_2/6_Confidence_0.333_Length_883, vo_n2_Locus_3013_Transcript_1/2_Confidence_0.750_Length_964, vo_n2_Locus_34681_Transcript_5/6_Confidence_0.077_Length_2256, vo_c3_Locus_26080_Transcript_2/2_Confidence_0.250_Length_928, vo_c2_Locus_5609_Transcript_4/4_Confidence_0.250_Length_1105, vo_c3_Locus_17900_Transcript_1/1_Confidence_0.000_Length_966, tri_c_comp22021_c0_seq1, vo_c3_Locus_2584_Transcript_3/5_Confidence_0.727_Length_2680, vo_c3_Locus_2584_Transcript_5/5_Confidence_0.500_Length_3685, vo_c1_Locus_2715_Transcript_9/14_Confidence_0.429_Length_1359, vo_c1_Locus_2066_Transcript_3/17_Confidence_0.415_Length_3989, vo_c3_Locus_4226_Transcript_1/2_Confidence_1.000_Length_2714, vo_c1_Locus_10489_Transcript_1/1_Confidence_0.000_Length_1447, vo_c2_Locus_80_Transcript_8/10_Confidence_0.310_Length_2635, vo_c1_Locus_2066_Transcript_16/17_Confidence_0.293_Length_2774, vo_n1_Locus_4390_Transcript_2/5_Confidence_0.333_Length_2677, vo_n1_Locus_4390_Transcript_3/5_Confidence_0.600_Length_2659, vo_n2_Locus_2860_Transcript_3/6_Confidence_0.250_Length_3111, vo_n1_Locus_2992_Transcript_5/14_Confidence_0.476_Length_1500, vo_n2_Locus_294_Transcript_20/20_Confidence_0.167_Length_2119, vo_c3_Locus_3000_Transcript_12/15_Confidence_0.407_Length_1288, vo_c2_Locus_5247_Transcript_3/7_Confidence_0.500_Length_1443, vo_n1_Locus_357_Transcript_3/6_Confidence_0.429_Length_2710, vo_c2_Locus_5247_Transcript_6/7_Confidence_0.600_Length_1453, vo_c2_Locus_80_Transcript_10/10_Confidence_0.207_Length_2759, vo_c3_Locus_3000_Transcript_6/15_Confidence_0.556_Length_1355, vo_n1_Locus_1856_Transcript_4/7_Confidence_0.462_Length_1396, vo_c2_Locus_5247_Transcript_5/7_Confidence_0.300_Length_1303, vo_c2_Locus_5247_Transcript_4/7_Confidence_0.400_Length_1501, vo_c1_Locus_2715_Transcript_6/14_Confidence_0.429_Length_1383, vo_c3_Locus_3737_Transcript_1/1_Confidence_0.500_Length_2762, vo_c2_Locus_5247_Transcript_7/7_Confidence_0.100_Length_1511, tri_c_comp13375_c0_seq4, vo_c1_Locus_1353_Transcript_2/5_Confidence_0.600_Length_1352, vo_c3_Locus_3000_Transcript_7/15_Confidence_0.259_Length_1522, vo_c2_Locus_6282_Transcript_1/2_Confidence_0.857_Length_2758, vo_n2_Locus_2860_Transcript_4/6_Confidence_0.583_Length_4084, tri_c_comp13375_c0_seq3, vo_n1_Locus_2992_Transcript_6/14_Confidence_0.476_Length_1522, vo_c1_Locus_8043_Transcript_1/1_Confidence_0.000_Length_1747, vo_n2_Locus_20981_Transcript_1/1_Confidence_0.000_Length_2435, vo_n2_Locus_5430_Transcript_2/3_Confidence_0.400_Length_1394, tri_n_comp34788_c0_seq1, vo_c1_Locus_1493_Transcript_3/4_Confidence_0.286_Length_2721, vo_n3_Locus_29456_Transcript_1/1_Confidence_0.000_Length_1949, tri_n_comp19474_c0_seq4, tri_n_comp18543_c0_seq8, vo_c2_Locus_14292_Transcript_1/3_Confidence_0.857_Length_1370, vo_n2_Locus_25571_Transcript_1/1_Confidence_0.000_Length_1103, tri_n_comp18543_c0_seq4, vo_c2_Locus_13495_Transcript_4/17_Confidence_0.346_Length_1808, tri_c_comp25671_c0_seq1, tri_n_comp49842_c0_seq1, vo_n2_Locus_6054_Transcript_2/13_Confidence_0.556_Length_2470, vo_c2_Locus_14292_Transcript_3/3_Confidence_0.429_Length_1343, vo_c3_Locus_5223_Transcript_5/7_Confidence_0.444_Length_5924, vo_c3_Locus_6304_Transcript_1/17_Confidence_0.159_Length_2915, vo_n2_Locus_353_Transcript_7/18_Confidence_0.420_Length_2960, vo_c1_Locus_5705_Transcript_18/19_Confidence_0.191_Length_3822, vo_n2_Locus_353_Transcript_14/18_Confidence_0.280_Length_2879, vo_n1_Locus_2903_Transcript_2/3_Confidence_0.400_Length_1386, vo_n1_Locus_464_Transcript_11/22_Confidence_0.362_Length_3670, vo_c2_Locus_11026_Transcript_2/2_Confidence_0.000_Length_1965, vo_c3_Locus_6304_Transcript_5/17_Confidence_0.477_Length_2995, vo_c1_Locus_5705_Transcript_16/19_Confidence_0.489_Length_4193, vo_c3_Locus_6304_Transcript_2/17_Confidence_0.523_Length_3712, vo_n2_Locus_15602_Transcript_2/2_Confidence_0.250_Length_2162, vo_c1_Locus_22469_Transcript_1/1_Confidence_0.000_Length_2691, vo_c1_Locus_2369_Transcript_1/3_Confidence_0.667_Length_1916, vo_n2_Locus_1545_Transcript_1/1_Confidence_0.000_Length_1374, vo_c1_Locus_2369_Transcript_2/3_Confidence_0.333_Length_2032, vo_c3_Locus_3736_Transcript_2/6_Confidence_0.571_Length_1920, vo_c3_Locus_3736_Transcript_4/6_Confidence_0.286_Length_917, vo_c3_Locus_26080_Transcript_2/2_Confidence_0.250_Length_928, vo_n1_Locus_30628_Transcript_1/2_Confidence_0.667_Length_554,</p> |
|------------------------|----------|----|------------------------------------------------------------------------------------------------------------------------------------------------------------------------------------------------------------------------------------------------------------------------------------------------------------------------------------------------------------------------------------------------------------------------------------------------------------------------------------------------------------------------------------------------------------------------------------|-------------------------------------------------------|--------------------------------------------------------------------------------------------------------------------------------------------------------------------------------------------------------------------------------------------------------------------------------------------------------------------------------------------------------------------------------------------------------------------------------------------------------------------------------------------------------------------------------------------------------------------------------------------------------------------------------------------------------------------------------------------------------------------------------------------------------------------------------------------------------------------------------------------------------------------------------------------------------------------------------------------------------------------------------------------------------------------------------------------------------------------------------------------------------------------------------------------------------------------------------------------------------------------------------------------------------------------------------------------------------------------------------------------------------------------------------------------------------------------------------------------------------------------------------------------------------------------------------------------------------------------------------------------------------------------------------------------------------------------------------------------------------------------------------------------------------------------------------------------------------------------------------------------------------------------------------------------------------------------------------------------------------------------------------------------------------------------------------------------------------------------------------------------------------------------------------------------------------------------------------------------------------------------------------------------------------------------------------------------------------------------------------------------------------------------------------------------------------------------------------------------------------------------------------------------------------------------------------------------------------------------------------------------------------------------------------------------------------------------------------------------------------------------------------------------------------------------------------------------------------------------------------------------------------------------------------------------------------------------------------------------------------------------------------------------------------------------------------------------------------------------------------------------------------------------------------------------------------------------------------------------------------------------------------------------------------------------------------------------------------------------------------------------------------------------------------------------------------------------------------------------------------------------------------------------------------------------------------------------------------------------------------------------------------------------------------------------------------------------------------------------------------------------------------------------------------------------------------------------------------------------------------------------------------------------------------------------------------------------------------------------------------------------------------------------------------------------------------------------------------------------------------------------------------------------------------------------------------------------------------------------------------------------------------------------------------------------------------------------------------------------------------------------------------------------------------------------------------------------------------------------------------------------------------------------------------------------------------------------------------------------------------------------------------------------------------------------------------------------------------------------------------------------------------------------------------------------------------------------------------------------------------------------------------------------------------------------------------------------------------------------------------------------------------------------------------------------------------------------------------------------------------------------------------------------------------------------------------------------------------------------------------------------------------------------------------------------------------------------------------------------------------------------------------------------------------------------------------------------------------------------------------------------------------------------------------------------------------------------------------------------------------------------------------------------------------------------------------------------------------------------------------------------------------------------------------------------------------------------------------------------------------------------------------------------------------------------------------------------------------------------------------------------------------------------------------------------------------------------------------------------------------------------------------------------------------------------------------------------------------------------------------------------------------------------------------------------------------------------------------------------------------------------------------------------------------------------------------------------------------------------------------------------------------------------------------------------------------------------------------------------------------------------------------------------------------------------------------------------------------------------------------------------------------------------------------------------------------------------------------------------------------------------------------------------------------------------------------------------------------------------------|

|  |  |  |  |  |                                                                                                                                                                                                                                                                                                                                                                                                                                                                                                                                                                                                                                                                                                                                                                      |
|--|--|--|--|--|----------------------------------------------------------------------------------------------------------------------------------------------------------------------------------------------------------------------------------------------------------------------------------------------------------------------------------------------------------------------------------------------------------------------------------------------------------------------------------------------------------------------------------------------------------------------------------------------------------------------------------------------------------------------------------------------------------------------------------------------------------------------|
|  |  |  |  |  | <p>vo_c3_Locus_7729_Transcript_4/5_Confidence_0.167_Length_5654, vo_n2_Locus_23060_Transcript_2/2_Confidence_0.000_Length_889, vo_n1_Locus_4880_Transcript_4/6_Confidence_0.333_Length_1109, vo_n1_Locus_4880_Transcript_2/6_Confidence_0.333_Length_883, vo_n2_Locus_3013_Transcript_1/2_Confidence_0.750_Length_964, vo_n3_Locus_2602_Transcript_1/2_Confidence_0.750_Length_664, tri_c_comp52750_c0_seq1, vo_n2_Locus_3_Transcript_19366/24291_Confidence_0.000_Length_2154, vo_c2_Locus_5609_Transcript_4/4_Confidence_0.250_Length_1105, vo_c3_Locus_17900_Transcript_1/1_Confidence_0.000_Length_966, vo_n3_Locus_15275_Transcript_1/5_Confidence_0.300_Length_3763, vo_c3_Locus_11858_Transcript_3/3_Confidence_0.000_Length_503, tri_c_comp22021_c0_seq1</p> |
|--|--|--|--|--|----------------------------------------------------------------------------------------------------------------------------------------------------------------------------------------------------------------------------------------------------------------------------------------------------------------------------------------------------------------------------------------------------------------------------------------------------------------------------------------------------------------------------------------------------------------------------------------------------------------------------------------------------------------------------------------------------------------------------------------------------------------------|

|                                                   |          |    |                                                                                                                                                                                                                                                                                                                                                                                                                                                                                                                    |                                                |                                                                                                                                                                                                                                                                                                                                                                                                                                                                                                                                                                                                                                                                                                                                                                                                                                                                                                                                                                                                                                                                                                                                                                                                                                                                                                                                                                                                                                                                                                                                                                                                                                                                                                                                                                                                                                                                                                                                                                                                                              |
|---------------------------------------------------|----------|----|--------------------------------------------------------------------------------------------------------------------------------------------------------------------------------------------------------------------------------------------------------------------------------------------------------------------------------------------------------------------------------------------------------------------------------------------------------------------------------------------------------------------|------------------------------------------------|------------------------------------------------------------------------------------------------------------------------------------------------------------------------------------------------------------------------------------------------------------------------------------------------------------------------------------------------------------------------------------------------------------------------------------------------------------------------------------------------------------------------------------------------------------------------------------------------------------------------------------------------------------------------------------------------------------------------------------------------------------------------------------------------------------------------------------------------------------------------------------------------------------------------------------------------------------------------------------------------------------------------------------------------------------------------------------------------------------------------------------------------------------------------------------------------------------------------------------------------------------------------------------------------------------------------------------------------------------------------------------------------------------------------------------------------------------------------------------------------------------------------------------------------------------------------------------------------------------------------------------------------------------------------------------------------------------------------------------------------------------------------------------------------------------------------------------------------------------------------------------------------------------------------------------------------------------------------------------------------------------------------------|
| Phenylalane, tyrosine and tryptophan biosynthesis | map00400 | 16 | <p>ec:4.1.1.48 - synthase,<br/> ec:4.2.1.51 - dehydratase,<br/> ec:2.5.1.19 - 1-carboxyvinyltransferase,<br/> ec:2.6.1.78 - aminotransferase,<br/> ec:2.6.1.79 - aminotransferase,<br/> ec:4.2.1.91 - dehydratase,<br/> ec:2.6.1.1 - transaminase,<br/> ec:1.3.1.13 - dehydrogenase (NADP+), ec:1.3.1.12 - dehydrogenase,<br/> ec:1.14.16.1 - 4-monooxygenase, ec:4.2.3.4 - synthase, ec:5.4.99.5 - mutase, ec:4.2.1.20 - synthase, ec:4.2.1.10 - dehydratase, ec:2.5.1.54 - synthase, ec:5.3.1.24 - isomerase</p> | 1, 1, 1, 2, 2, 1, 4, 1, 1, 8, 5, 1, 2, 2, 1, 1 | <p>vo_c3_Locus_25814_Transcript_1/1_Confidence_0.000_Length_1912, vo_c2_Locus_15226_Transcript_2/2_Confidence_0.500_Length_2141, tri_c_comp32056_c0_seq1, tri_n_comp27683_c0_seq1, vo_n1_Locus_3423_Transcript_3/4_Confidence_0.250_Length_1416, tri_n_comp27683_c0_seq1, vo_n1_Locus_3423_Transcript_3/4_Confidence_0.250_Length_1416, vo_c2_Locus_15226_Transcript_2/2_Confidence_0.500_Length_2141, vo_n1_Locus_3423_Transcript_2/4_Confidence_0.250_Length_1347, tri_n_comp27683_c0_seq1, vo_c1_Locus_3127_Transcript_1/1_Confidence_0.000_Length_1478, vo_n1_Locus_3423_Transcript_3/4_Confidence_0.250_Length_1416, vo_c2_Locus_15226_Transcript_2/2_Confidence_0.500_Length_2141, vo_c2_Locus_15226_Transcript_2/2_Confidence_0.500_Length_2141, vo_c2_Locus_16025_Transcript_2/3_Confidence_0.400_Length_2217, vo_c3_Locus_4625_Transcript_6/11_Confidence_0.650_Length_2945, vo_c2_Locus_12196_Transcript_8/8_Confidence_0.133_Length_3092, vo_n1_Locus_3143_Transcript_9/11_Confidence_0.350_Length_2900, vo_c3_Locus_4625_Transcript_2/11_Confidence_0.350_Length_974, vo_c3_Locus_4625_Transcript_1/11_Confidence_0.350_Length_912, vo_c3_Locus_4625_Transcript_4/11_Confidence_0.650_Length_3056, vo_c3_Locus_4625_Transcript_3/11_Confidence_0.300_Length_1085, vo_n1_Locus_17511_Transcript_1/1_Confidence_0.000_Length_1342, vo_c1_Locus_219_Transcript_18/20_Confidence_0.373_Length_2065, vo_c3_Locus_2261_Transcript_20/33_Confidence_0.517_Length_1984, vo_c3_Locus_2261_Transcript_15/33_Confidence_0.500_Length_2011, vo_n1_Locus_14156_Transcript_1/1_Confidence_0.000_Length_1313, vo_n2_Locus_10254_Transcript_1/1_Confidence_0.000_Length_1125, tri_c_comp44055_c0_seq1, vo_c1_Locus_8760_Transcript_1/1_Confidence_0.000_Length_2415, vo_n1_Locus_29816_Transcript_1/1_Confidence_0.000_Length_650, vo_n1_Locus_5622_Transcript_1/3_Confidence_0.600_Length_1895, vo_n2_Locus_2223_Transcript_2/2_Confidence_0.250_Length_1508, vo_c3_Locus_25814_Transcript_1/1_Confidence_0.000_Length_1912</p> |
|---------------------------------------------------|----------|----|--------------------------------------------------------------------------------------------------------------------------------------------------------------------------------------------------------------------------------------------------------------------------------------------------------------------------------------------------------------------------------------------------------------------------------------------------------------------------------------------------------------------|------------------------------------------------|------------------------------------------------------------------------------------------------------------------------------------------------------------------------------------------------------------------------------------------------------------------------------------------------------------------------------------------------------------------------------------------------------------------------------------------------------------------------------------------------------------------------------------------------------------------------------------------------------------------------------------------------------------------------------------------------------------------------------------------------------------------------------------------------------------------------------------------------------------------------------------------------------------------------------------------------------------------------------------------------------------------------------------------------------------------------------------------------------------------------------------------------------------------------------------------------------------------------------------------------------------------------------------------------------------------------------------------------------------------------------------------------------------------------------------------------------------------------------------------------------------------------------------------------------------------------------------------------------------------------------------------------------------------------------------------------------------------------------------------------------------------------------------------------------------------------------------------------------------------------------------------------------------------------------------------------------------------------------------------------------------------------------|



|                                |          |    |                                                                                                                                                                                                                                                                                                                                                                                                                                                                                                                                                                                |                                                                        |                                                                                                                                                                                                                                                                                                                                                                                                                                                                                                                                                                                                                                                                                                                                                                                                                                                                                                                                                                                                                                                                                                                                                                                                                                                                                                                                                                                                                                                                                                                                                                                                                                                                                                                                                                                                                                                                                                                                                                                                                                                                                                                                                                                                                                                                                                                                                                                                                                                                                                                                                                                                                                                                                                                                                                                                                                                                                                                                                                                                                                                                                                                                                                                                                                                                                                                                                                                                                                                                                                                                                                                                                                                                                                                                                                                                                                                                                                                                                                                                                                                                                                                                                                                                                                                                                                                                                                                                                                                                                                                                                                                                                                                                                                                                                                                                                                                                                                                                                                                                                                                                                                                                                                                                                                                                                                                                                                                                                                                                                                                                                                                                                                                                                                                                                                                                                                                                                                                                                                                                                                                                                                                                                                                                                                                                                                                                                                                                                                                                                                                                                                                                                                                                                                                                                                                                                                                                                                                                                                                                                                                                                                                                                                                    |
|--------------------------------|----------|----|--------------------------------------------------------------------------------------------------------------------------------------------------------------------------------------------------------------------------------------------------------------------------------------------------------------------------------------------------------------------------------------------------------------------------------------------------------------------------------------------------------------------------------------------------------------------------------|------------------------------------------------------------------------|------------------------------------------------------------------------------------------------------------------------------------------------------------------------------------------------------------------------------------------------------------------------------------------------------------------------------------------------------------------------------------------------------------------------------------------------------------------------------------------------------------------------------------------------------------------------------------------------------------------------------------------------------------------------------------------------------------------------------------------------------------------------------------------------------------------------------------------------------------------------------------------------------------------------------------------------------------------------------------------------------------------------------------------------------------------------------------------------------------------------------------------------------------------------------------------------------------------------------------------------------------------------------------------------------------------------------------------------------------------------------------------------------------------------------------------------------------------------------------------------------------------------------------------------------------------------------------------------------------------------------------------------------------------------------------------------------------------------------------------------------------------------------------------------------------------------------------------------------------------------------------------------------------------------------------------------------------------------------------------------------------------------------------------------------------------------------------------------------------------------------------------------------------------------------------------------------------------------------------------------------------------------------------------------------------------------------------------------------------------------------------------------------------------------------------------------------------------------------------------------------------------------------------------------------------------------------------------------------------------------------------------------------------------------------------------------------------------------------------------------------------------------------------------------------------------------------------------------------------------------------------------------------------------------------------------------------------------------------------------------------------------------------------------------------------------------------------------------------------------------------------------------------------------------------------------------------------------------------------------------------------------------------------------------------------------------------------------------------------------------------------------------------------------------------------------------------------------------------------------------------------------------------------------------------------------------------------------------------------------------------------------------------------------------------------------------------------------------------------------------------------------------------------------------------------------------------------------------------------------------------------------------------------------------------------------------------------------------------------------------------------------------------------------------------------------------------------------------------------------------------------------------------------------------------------------------------------------------------------------------------------------------------------------------------------------------------------------------------------------------------------------------------------------------------------------------------------------------------------------------------------------------------------------------------------------------------------------------------------------------------------------------------------------------------------------------------------------------------------------------------------------------------------------------------------------------------------------------------------------------------------------------------------------------------------------------------------------------------------------------------------------------------------------------------------------------------------------------------------------------------------------------------------------------------------------------------------------------------------------------------------------------------------------------------------------------------------------------------------------------------------------------------------------------------------------------------------------------------------------------------------------------------------------------------------------------------------------------------------------------------------------------------------------------------------------------------------------------------------------------------------------------------------------------------------------------------------------------------------------------------------------------------------------------------------------------------------------------------------------------------------------------------------------------------------------------------------------------------------------------------------------------------------------------------------------------------------------------------------------------------------------------------------------------------------------------------------------------------------------------------------------------------------------------------------------------------------------------------------------------------------------------------------------------------------------------------------------------------------------------------------------------------------------------------------------------------------------------------------------------------------------------------------------------------------------------------------------------------------------------------------------------------------------------------------------------------------------------------------------------------------------------------------------------------------------------------------------------------------------------------------------------------------------------------------|
| Glycerophospholipid metabolism | map00564 | 16 | <p>ec:2.7.1.107 - kinase (ATP),<br/> ec:2.7.1.32 - kinase,<br/> ec:4.1.1.65 - decarboxylase,<br/> ec:2.7.8.2 - cholinephosphotransferase,<br/> ec:2.7.8.5 - 1-phosphatidyltransferase,<br/> ec:3.1.1.4 - A2, ec:3.1.1.5 - lecithinase B, ec:1.1.1.8 - dehydrogenase (NAD+),<br/> ec:2.7.7.41 - cytidylyltransferase,<br/> ec:2.7.7.14 - cytidylyltransferase,<br/> ec:2.7.7.15 - cytidylyltransferase,<br/> ec:1.1.5.3 - dehydrogenase,<br/> ec:3.1.3.75 - phosphatase,<br/> ec:2.3.1.51 - O-acyltransferase,<br/> ec:2.1.1.103 - N-methyltransferase,<br/> ec:3.1.4.4 - D</p> | <p>9, 7, 2, 1,<br/> 3, 59, 5, 6,<br/> 1, 3, 4, 6,<br/> 1, 2, 1, 13</p> | <p>tri_n_comp47452_c0_seq1, vo_c3_Locus_6073_Transcript_2/9_Confidence_0.467_Length_1975,<br/> vo_c2_Locus_6531_Transcript_1/1_Confidence_0.000_Length_1860, tri_c_comp37156_c0_seq1,<br/> vo_c1_Locus_17180_Transcript_1/1_Confidence_0.000_Length_4157, vo_c2_Locus_11596_Transcript_2/3_Confidence_0.167_Length_1499,<br/> vo_n2_Locus_6369_Transcript_1/1_Confidence_0.000_Length_1901, vo_n2_Locus_8637_Transcript_3/3_Confidence_0.000_Length_1561,<br/> vo_c3_Locus_6073_Transcript_3/9_Confidence_0.400_Length_2122, vo_c1_Locus_10562_Transcript_1/3_Confidence_0.600_Length_1690,<br/> vo_n2_Locus_10323_Transcript_2/2_Confidence_0.000_Length_2787, vo_n2_Locus_7555_Transcript_15/18_Confidence_0.436_Length_3023,<br/> vo_n3_Locus_18_Transcript_1/1_Confidence_0.000_Length_1596, vo_n2_Locus_6874_Transcript_1/1_Confidence_0.000_Length_1254,<br/> vo_n3_Locus_17698_Transcript_1/1_Confidence_0.000_Length_1625, vo_c1_Locus_10067_Transcript_5/6_Confidence_0.417_Length_1561,<br/> vo_n2_Locus_17534_Transcript_2/2_Confidence_0.000_Length_1917, vo_n1_Locus_3423_Transcript_3/4_Confidence_0.250_Length_1416,<br/> vo_n2_Locus_32954_Transcript_1/2_Confidence_0.333_Length_1192, vo_c3_Locus_505_Transcript_1/2_Confidence_0.333_Length_960,<br/> vo_n2_Locus_3_Transcript_18744/24291_Confidence_0.000_Length_992, vo_n2_Locus_3_Transcript_18745/24291_Confidence_0.000_Length_1071,<br/> vo_n2_Locus_311_Transcript_71/114_Confidence_0.150_Length_1045, vo_c3_Locus_7729_Transcript_4/5_Confidence_0.167_Length_5654,<br/> vo_n1_Locus_443_Transcript_30/53_Confidence_0.193_Length_928, vo_c1_Locus_430_Transcript_20/51_Confidence_0.291_Length_976,<br/> vo_c2_Locus_601_Transcript_31/36_Confidence_0.229_Length_1002, vo_c2_Locus_5092_Transcript_6/14_Confidence_0.476_Length_1090,<br/> vo_c3_Locus_1328_Transcript_24/26_Confidence_0.245_Length_1398, vo_n2_Locus_311_Transcript_78/114_Confidence_0.093_Length_844,<br/> vo_c3_Locus_1273_Transcript_51/57_Confidence_0.108_Length_895, vo_c1_Locus_21671_Transcript_6/49_Confidence_0.021_Length_1919,<br/> vo_c3_Locus_1273_Transcript_50/57_Confidence_0.144_Length_1471, vo_n1_Locus_443_Transcript_24/53_Confidence_0.109_Length_905,<br/> vo_n2_Locus_311_Transcript_87/114_Confidence_0.061_Length_2919, vo_n3_Locus_407_Transcript_22/43_Confidence_0.292_Length_1222,<br/> tri_n_comp10070_c0_seq2, tri_c_comp22021_c0_seq1, vo_n1_Locus_443_Transcript_32/53_Confidence_0.252_Length_1164,<br/> vo_n3_Locus_407_Transcript_32/43_Confidence_0.283_Length_1271, vo_n1_Locus_443_Transcript_10/53_Confidence_0.193_Length_1076,<br/> vo_n3_Locus_407_Transcript_7/43_Confidence_0.132_Length_1778, vo_n2_Locus_311_Transcript_109/114_Confidence_0.117_Length_1018,<br/> vo_n3_Locus_407_Transcript_39/43_Confidence_0.236_Length_1222, vo_c3_Locus_15467_Transcript_2/2_Confidence_0.000_Length_1100,<br/> vo_n1_Locus_4880_Transcript_2/6_Confidence_0.333_Length_883, vo_n2_Locus_3013_Transcript_1/2_Confidence_0.750_Length_964,<br/> vo_n2_Locus_311_Transcript_112/114_Confidence_0.146_Length_1678, vo_c2_Locus_601_Transcript_27/36_Confidence_0.337_Length_991,<br/> vo_c2_Locus_601_Transcript_2/36_Confidence_0.133_Length_1744, vo_n1_Locus_443_Transcript_39/53_Confidence_0.210_Length_1938,<br/> vo_c3_Locus_15467_Transcript_1/2_Confidence_0.750_Length_988, vo_c1_Locus_430_Transcript_11/51_Confidence_0.145_Length_955,<br/> vo_c2_Locus_5092_Transcript_10/14_Confidence_0.429_Length_1495, vo_n2_Locus_21867_Transcript_2/5_Confidence_0.200_Length_5139,<br/> tri_n_comp20432_c0_seq6, vo_n2_Locus_311_Transcript_84/114_Confidence_0.117_Length_1124,<br/> vo_n2_Locus_311_Transcript_77/114_Confidence_0.134_Length_997, vo_n2_Locus_311_Transcript_90/114_Confidence_0.061_Length_1016,<br/> vo_c2_Locus_601_Transcript_11/36_Confidence_0.289_Length_1016, tri_n_comp20432_c0_seq2,<br/> vo_c1_Locus_430_Transcript_48/51_Confidence_0.227_Length_968, vo_n1_Locus_443_Transcript_17/53_Confidence_0.168_Length_1009,<br/> tri_c_comp8925_c1_seq1, vo_c2_Locus_601_Transcript_18/36_Confidence_0.265_Length_801,<br/> vo_c3_Locus_1273_Transcript_17/57_Confidence_0.050_Length_1126, vo_n3_Locus_407_Transcript_40/43_Confidence_0.217_Length_1200,<br/> vo_c2_Locus_601_Transcript_36/36_Confidence_0.217_Length_953, vo_n3_Locus_407_Transcript_8/43_Confidence_0.189_Length_1800,<br/> vo_c3_Locus_1273_Transcript_16/57_Confidence_0.079_Length_1101, tri_n_comp20662_c0_seq7,<br/> vo_n2_Locus_23060_Transcript_2/2_Confidence_0.000_Length_889, vo_c2_Locus_601_Transcript_15/36_Confidence_0.337_Length_815,<br/> vo_n1_Locus_4880_Transcript_4/6_Confidence_0.333_Length_1109, vo_n2_Locus_311_Transcript_3/114_Confidence_0.142_Length_866,<br/> tri_c_comp20860_c0_seq2, vo_n1_Locus_443_Transcript_8/53_Confidence_0.261_Length_1031,<br/> vo_n1_Locus_443_Transcript_49/53_Confidence_0.134_Length_862, vo_n3_Locus_407_Transcript_14/43_Confidence_0.142_Length_872,<br/> vo_c2_Locus_5609_Transcript_4/4_Confidence_0.250_Length_1105, vo_c3_Locus_17900_Transcript_1/1_Confidence_0.000_Length_966,<br/> tri_c_comp3336_c0_seq2, tri_c_comp14506_c0_seq1, vo_c2_Locus_8559_Transcript_12/12_Confidence_0.130_Length_2414, tri_c_comp3336_c0_seq1,<br/> vo_n2_Locus_16855_Transcript_8/9_Confidence_0.636_Length_2285, vo_c2_Locus_3936_Transcript_7/12_Confidence_0.412_Length_660,<br/> vo_c2_Locus_3936_Transcript_4/12_Confidence_0.353_Length_588, vo_c2_Locus_3936_Transcript_9/12_Confidence_0.235_Length_3618,<br/> vo_n2_Locus_22608_Transcript_1/1_Confidence_0.000_Length_1353, tri_c_comp15460_c1_seq4,<br/> vo_n2_Locus_1545_Transcript_1/1_Confidence_0.000_Length_1374, vo_c3_Locus_4113_Transcript_2/4_Confidence_0.500_Length_1659,<br/> vo_c3_Locus_19662_Transcript_1/2_Confidence_0.833_Length_5009, vo_c3_Locus_1617_Transcript_6/6_Confidence_0.222_Length_1645,<br/> vo_n1_Locus_16053_Transcript_1/1_Confidence_0.000_Length_1438, vo_c3_Locus_19662_Transcript_1/2_Confidence_0.833_Length_5009,<br/> vo_c3_Locus_1617_Transcript_6/6_Confidence_0.222_Length_1645, vo_n1_Locus_16053_Transcript_1/1_Confidence_0.000_Length_1438,<br/> vo_n1_Locus_29872_Transcript_1/1_Confidence_0.000_Length_1764, vo_c2_Locus_3936_Transcript_7/12_Confidence_0.412_Length_660,<br/> vo_c2_Locus_3936_Transcript_4/12_Confidence_0.353_Length_588, vo_c2_Locus_3936_Transcript_9/12_Confidence_0.235_Length_3618,<br/> vo_c1_Locus_11476_Transcript_1/4_Confidence_0.667_Length_1434, tri_c_comp15460_c1_seq4,<br/> vo_n2_Locus_1545_Transcript_1/1_Confidence_0.000_Length_1374, tri_c_comp14949_c0_seq1,<br/> vo_n2_Locus_4057_Transcript_1/1_Confidence_0.000_Length_1221, vo_n1_Locus_7235_Transcript_3/6_Confidence_0.625_Length_1162,<br/> vo_n2_Locus_7309_Transcript_1/2_Confidence_1.000_Length_1642, vo_c1_Locus_947_Transcript_1/7_Confidence_0.286_Length_2009,<br/> vo_c3_Locus_6042_Transcript_5/5_Confidence_0.300_Length_3385, vo_c3_Locus_4758_Transcript_1/1_Confidence_0.000_Length_1881,<br/> tri_n_comp25890_c0_seq1, tri_c_comp20356_c0_seq35, tri_c_comp20356_c0_seq10, tri_c_comp20356_c0_seq21,</p> |
|--------------------------------|----------|----|--------------------------------------------------------------------------------------------------------------------------------------------------------------------------------------------------------------------------------------------------------------------------------------------------------------------------------------------------------------------------------------------------------------------------------------------------------------------------------------------------------------------------------------------------------------------------------|------------------------------------------------------------------------|------------------------------------------------------------------------------------------------------------------------------------------------------------------------------------------------------------------------------------------------------------------------------------------------------------------------------------------------------------------------------------------------------------------------------------------------------------------------------------------------------------------------------------------------------------------------------------------------------------------------------------------------------------------------------------------------------------------------------------------------------------------------------------------------------------------------------------------------------------------------------------------------------------------------------------------------------------------------------------------------------------------------------------------------------------------------------------------------------------------------------------------------------------------------------------------------------------------------------------------------------------------------------------------------------------------------------------------------------------------------------------------------------------------------------------------------------------------------------------------------------------------------------------------------------------------------------------------------------------------------------------------------------------------------------------------------------------------------------------------------------------------------------------------------------------------------------------------------------------------------------------------------------------------------------------------------------------------------------------------------------------------------------------------------------------------------------------------------------------------------------------------------------------------------------------------------------------------------------------------------------------------------------------------------------------------------------------------------------------------------------------------------------------------------------------------------------------------------------------------------------------------------------------------------------------------------------------------------------------------------------------------------------------------------------------------------------------------------------------------------------------------------------------------------------------------------------------------------------------------------------------------------------------------------------------------------------------------------------------------------------------------------------------------------------------------------------------------------------------------------------------------------------------------------------------------------------------------------------------------------------------------------------------------------------------------------------------------------------------------------------------------------------------------------------------------------------------------------------------------------------------------------------------------------------------------------------------------------------------------------------------------------------------------------------------------------------------------------------------------------------------------------------------------------------------------------------------------------------------------------------------------------------------------------------------------------------------------------------------------------------------------------------------------------------------------------------------------------------------------------------------------------------------------------------------------------------------------------------------------------------------------------------------------------------------------------------------------------------------------------------------------------------------------------------------------------------------------------------------------------------------------------------------------------------------------------------------------------------------------------------------------------------------------------------------------------------------------------------------------------------------------------------------------------------------------------------------------------------------------------------------------------------------------------------------------------------------------------------------------------------------------------------------------------------------------------------------------------------------------------------------------------------------------------------------------------------------------------------------------------------------------------------------------------------------------------------------------------------------------------------------------------------------------------------------------------------------------------------------------------------------------------------------------------------------------------------------------------------------------------------------------------------------------------------------------------------------------------------------------------------------------------------------------------------------------------------------------------------------------------------------------------------------------------------------------------------------------------------------------------------------------------------------------------------------------------------------------------------------------------------------------------------------------------------------------------------------------------------------------------------------------------------------------------------------------------------------------------------------------------------------------------------------------------------------------------------------------------------------------------------------------------------------------------------------------------------------------------------------------------------------------------------------------------------------------------------------------------------------------------------------------------------------------------------------------------------------------------------------------------------------------------------------------------------------------------------------------------------------------------------------------------------------------------------------------------------------------------------------------------------------------------------------------------------------|

|  |  |  |  |  |                                                                                                                                                                                                 |
|--|--|--|--|--|-------------------------------------------------------------------------------------------------------------------------------------------------------------------------------------------------|
|  |  |  |  |  | vo_n2_Locus_6470_Transcript_5/10_Confidence_0.333_Length_2772, tri_c_comp20356_c0_seq29, tri_c_comp20356_c0_seq27, tri_c_comp20356_c0_seq25, tri_c_comp20356_c0_seq36, tri_c_comp20356_c0_seq47 |
|--|--|--|--|--|-------------------------------------------------------------------------------------------------------------------------------------------------------------------------------------------------|

|                                 |          |    |                                                                                                                                                                                                                                                                                                                                                                                                                                                                                    |                                                                    |                                                                                                                                                                                                                                                                                                                                                                                                                                                                                                                                                                                                                                                                                                                                                                                                                                                                                                                                                                                                                                                                                                                                                                                                                                                                                                                                                                                                                                                                                                                                                                                                                                                                                                                                                                                                                                                                                                                                                                                                                                                                                                                                                                                                                                                                                                                                                                                                                                                                                                                                                                                                                            |
|---------------------------------|----------|----|------------------------------------------------------------------------------------------------------------------------------------------------------------------------------------------------------------------------------------------------------------------------------------------------------------------------------------------------------------------------------------------------------------------------------------------------------------------------------------|--------------------------------------------------------------------|----------------------------------------------------------------------------------------------------------------------------------------------------------------------------------------------------------------------------------------------------------------------------------------------------------------------------------------------------------------------------------------------------------------------------------------------------------------------------------------------------------------------------------------------------------------------------------------------------------------------------------------------------------------------------------------------------------------------------------------------------------------------------------------------------------------------------------------------------------------------------------------------------------------------------------------------------------------------------------------------------------------------------------------------------------------------------------------------------------------------------------------------------------------------------------------------------------------------------------------------------------------------------------------------------------------------------------------------------------------------------------------------------------------------------------------------------------------------------------------------------------------------------------------------------------------------------------------------------------------------------------------------------------------------------------------------------------------------------------------------------------------------------------------------------------------------------------------------------------------------------------------------------------------------------------------------------------------------------------------------------------------------------------------------------------------------------------------------------------------------------------------------------------------------------------------------------------------------------------------------------------------------------------------------------------------------------------------------------------------------------------------------------------------------------------------------------------------------------------------------------------------------------------------------------------------------------------------------------------------------------|
| Arginine and proline metabolism | map00330 | 15 | <p>ec:1.4.3.3 - oxidase,<br/> ec:1.14.11.2 - dioxygenase,<br/> ec:2.5.1.16 - synthase,<br/> ec:2.5.1.22 - synthase,<br/> ec:2.6.1.81 - transaminase,<br/> ec:4.1.1.17 - decarboxylase,<br/> ec:2.6.1.1 - transaminase,<br/> ec:1.2.1.3 - dehydrogenase (NAD+), ec:3.5.3.11 - agmatine ureohydrolase,<br/> ec:1.5.1.2 - reductase,<br/> ec:3.5.1.4 - acylamidase,<br/> ec:2.7.3.2 - kinase,<br/> ec:3.5.3.1 - arginine amidinase, ec:2.7.2.11 - 5-kinase, ec:5.1.1.4 - racemase</p> | <p>1, 20, 1, 2,<br/> 1, 1, 4, 5,<br/> 1, 1, 3, 2,<br/> 1, 1, 1</p> | <p>vo_n2_Locus_26350_Transcript_7/9_Confidence_0.231_Length_1309, vo_c1_Locus_1460_Transcript_4/35_Confidence_0.155_Length_1407, vo_c2_Locus_16106_Transcript_1/1_Confidence_0.000_Length_993, vo_c3_Locus_1745_Transcript_21/21_Confidence_0.302_Length_1239, vo_n1_Locus_7577_Transcript_4/4_Confidence_0.429_Length_967, vo_c1_Locus_1460_Transcript_3/35_Confidence_0.172_Length_836, vo_c1_Locus_8740_Transcript_2/3_Confidence_0.333_Length_2420, tri_c_comp17414_c0_seq2, vo_c1_Locus_1460_Transcript_1/35_Confidence_0.155_Length_884, vo_n2_Locus_845_Transcript_1/1_Confidence_0.000_Length_944, vo_c2_Locus_4878_Transcript_2/4_Confidence_0.500_Length_1100, vo_c1_Locus_1460_Transcript_28/35_Confidence_0.207_Length_884, vo_n1_Locus_3958_Transcript_9/10_Confidence_0.211_Length_1244, vo_c1_Locus_1460_Transcript_17/35_Confidence_0.155_Length_1027, vo_n2_Locus_1182_Transcript_13/16_Confidence_0.488_Length_1489, vo_n1_Locus_3958_Transcript_2/10_Confidence_0.763_Length_1031, tri_n_comp19826_c0_seq2, vo_c3_Locus_16783_Transcript_1/1_Confidence_0.600_Length_988, tri_c_comp20282_c0_seq4, vo_c1_Locus_1460_Transcript_24/35_Confidence_0.241_Length_982, tri_c_comp35917_c0_seq1, vo_c2_Locus_25147_Transcript_1/2_Confidence_0.333_Length_1097, vo_c2_Locus_25147_Transcript_1/2_Confidence_0.333_Length_1097, tri_c_comp23701_c0_seq1, vo_c1_Locus_5351_Transcript_2/2_Confidence_0.333_Length_1693, vo_n1_Locus_24_Transcript_2/4_Confidence_0.667_Length_1878, vo_n1_Locus_3423_Transcript_2/4_Confidence_0.250_Length_1347, tri_n_comp27683_c0_seq1, vo_c1_Locus_3127_Transcript_1/1_Confidence_0.000_Length_1478, vo_n1_Locus_3423_Transcript_3/4_Confidence_0.250_Length_1416, tri_c_comp55340_c0_seq1, vo_n1_Locus_19864_Transcript_2/2_Confidence_0.000_Length_2707, vo_c3_Locus_21741_Transcript_5/9_Confidence_0.583_Length_1757, vo_n3_Locus_25600_Transcript_5/6_Confidence_0.375_Length_1777, tri_n_comp58061_c0_seq1, vo_c3_Locus_13257_Transcript_3/4_Confidence_0.375_Length_1594, vo_c3_Locus_7050_Transcript_5/6_Confidence_0.667_Length_1047, vo_c3_Locus_1581_Transcript_3/3_Confidence_0.000_Length_1736, vo_c1_Locus_1298_Transcript_3/6_Confidence_0.625_Length_1775, vo_n2_Locus_157_Transcript_2/4_Confidence_0.286_Length_2059, vo_c3_Locus_2801_Transcript_665/665_Confidence_0.000_Length_5508, vo_c3_Locus_2801_Transcript_664/665_Confidence_0.002_Length_5469, vo_c2_Locus_4334_Transcript_2/31_Confidence_0.064_Length_1982, vo_c2_Locus_12865_Transcript_1/3_Confidence_0.667_Length_1839, vo_n2_Locus_19368_Transcript_1/1_Confidence_0.000_Length_1215</p> |
|---------------------------------|----------|----|------------------------------------------------------------------------------------------------------------------------------------------------------------------------------------------------------------------------------------------------------------------------------------------------------------------------------------------------------------------------------------------------------------------------------------------------------------------------------------|--------------------------------------------------------------------|----------------------------------------------------------------------------------------------------------------------------------------------------------------------------------------------------------------------------------------------------------------------------------------------------------------------------------------------------------------------------------------------------------------------------------------------------------------------------------------------------------------------------------------------------------------------------------------------------------------------------------------------------------------------------------------------------------------------------------------------------------------------------------------------------------------------------------------------------------------------------------------------------------------------------------------------------------------------------------------------------------------------------------------------------------------------------------------------------------------------------------------------------------------------------------------------------------------------------------------------------------------------------------------------------------------------------------------------------------------------------------------------------------------------------------------------------------------------------------------------------------------------------------------------------------------------------------------------------------------------------------------------------------------------------------------------------------------------------------------------------------------------------------------------------------------------------------------------------------------------------------------------------------------------------------------------------------------------------------------------------------------------------------------------------------------------------------------------------------------------------------------------------------------------------------------------------------------------------------------------------------------------------------------------------------------------------------------------------------------------------------------------------------------------------------------------------------------------------------------------------------------------------------------------------------------------------------------------------------------------------|

|                      |          |    |                                                                                                                                                                                                                                                                                                                                                                                                                                                                                                                                                                      |                                           |                                                                                                                                                                                                                                                                                                                                                                                                                                                                                                                                                                                                                                                                                                                                                                                                                                                                                                                                                                                                                                                                                                                                                                                                                                                                                                                                                                                                                                                                                                                                                                                                                                                                                                                                                                                                                                                                                                                                                                                                                                                                                                                                                                                                                                                                                                                                                                                                                                                                                                                                                                                                                                                                                                                                                                                                                                                                                                                                                                                                                                                                                                                                                                                                                                                                                                                                                                                                                                                                                                                                                                                                                                                                                                                                                                                                                                                                 |
|----------------------|----------|----|----------------------------------------------------------------------------------------------------------------------------------------------------------------------------------------------------------------------------------------------------------------------------------------------------------------------------------------------------------------------------------------------------------------------------------------------------------------------------------------------------------------------------------------------------------------------|-------------------------------------------|-----------------------------------------------------------------------------------------------------------------------------------------------------------------------------------------------------------------------------------------------------------------------------------------------------------------------------------------------------------------------------------------------------------------------------------------------------------------------------------------------------------------------------------------------------------------------------------------------------------------------------------------------------------------------------------------------------------------------------------------------------------------------------------------------------------------------------------------------------------------------------------------------------------------------------------------------------------------------------------------------------------------------------------------------------------------------------------------------------------------------------------------------------------------------------------------------------------------------------------------------------------------------------------------------------------------------------------------------------------------------------------------------------------------------------------------------------------------------------------------------------------------------------------------------------------------------------------------------------------------------------------------------------------------------------------------------------------------------------------------------------------------------------------------------------------------------------------------------------------------------------------------------------------------------------------------------------------------------------------------------------------------------------------------------------------------------------------------------------------------------------------------------------------------------------------------------------------------------------------------------------------------------------------------------------------------------------------------------------------------------------------------------------------------------------------------------------------------------------------------------------------------------------------------------------------------------------------------------------------------------------------------------------------------------------------------------------------------------------------------------------------------------------------------------------------------------------------------------------------------------------------------------------------------------------------------------------------------------------------------------------------------------------------------------------------------------------------------------------------------------------------------------------------------------------------------------------------------------------------------------------------------------------------------------------------------------------------------------------------------------------------------------------------------------------------------------------------------------------------------------------------------------------------------------------------------------------------------------------------------------------------------------------------------------------------------------------------------------------------------------------------------------------------------------------------------------------------------------------------------|
| Galactose metabolism | map00052 | 14 | <p>ec:2.7.1.11 - phosphohexokinase,<br/> ec:2.7.7.10 - uridylyltransferase,<br/> ec:2.7.7.12 - uridylyltransferase,<br/> ec:3.2.1.20 - maltase,<br/> ec:3.2.1.22 - melibiase,<br/> ec:3.2.1.23 - lactase (ambiguous), ec:2.7.1.2 - glucokinase (phosphorylating),<br/> ec:2.7.1.6 - galactokinase (phosphorylating),<br/> ec:2.4.1.123 - 3-alpha-galactosyltransferase,<br/> ec:5.1.3.2 - 4-epimerase,<br/> ec:2.7.7.9 - uridylyltransferase,<br/> ec:5.4.99.9 - mutase,<br/> ec:5.4.2.2 - (alpha-D-glucose-1,6-bisphosphate-dependent), ec:1.1.1.21 - reductase</p> | 5, 5, 1, 1, 5, 6, 2, 4, 5, 9, 10, 3, 7, 4 | <p>vo_c3_Locus_1613_Transcript_6/17_Confidence_0.158_Length_5809, vo_n1_Locus_10193_Transcript_1/1_Confidence_0.000_Length_1647, vo_c2_Locus_6348_Transcript_1/2_Confidence_1.000_Length_3755, vo_n3_Locus_23556_Transcript_2/4_Confidence_0.500_Length_4210, tri_c_comp43537_c0_seq1, vo_n2_Locus_12563_Transcript_1/1_Confidence_0.000_Length_1886, vo_c1_Locus_21075_Transcript_1/3_Confidence_0.500_Length_1034, vo_n1_Locus_3509_Transcript_2/2_Confidence_0.000_Length_1894, tri_c_comp13085_c0_seq3, tri_c_comp54583_c0_seq1, vo_n2_Locus_26011_Transcript_1/2_Confidence_0.333_Length_2712, vo_n2_Locus_3872_Transcript_1/1_Confidence_0.000_Length_2389, vo_c2_Locus_17150_Transcript_58/102_Confidence_0.019_Length_2519, vo_n2_Locus_11259_Transcript_1/2_Confidence_0.333_Length_2880, tri_c_comp44396_c0_seq1, vo_n2_Locus_31986_Transcript_2/2_Confidence_0.333_Length_2185, vo_n2_Locus_20375_Transcript_1/2_Confidence_0.333_Length_1577, tri_c_comp12867_c0_seq1, vo_n2_Locus_1748_Transcript_2/3_Confidence_0.333_Length_4221, tri_n_comp70995_c0_seq1, vo_c2_Locus_26351_Transcript_1/2_Confidence_0.500_Length_4013, vo_c3_Locus_8047_Transcript_1/2_Confidence_0.333_Length_4021, vo_c3_Locus_32079_Transcript_2/2_Confidence_0.250_Length_2113, tri_c_comp10536_c0_seq1, vo_c2_Locus_32726_Transcript_2/2_Confidence_0.000_Length_696, vo_n1_Locus_7597_Transcript_1/2_Confidence_0.333_Length_2494, tri_c_comp10536_c0_seq1, vo_c1_Locus_21386_Transcript_3/8_Confidence_0.538_Length_942, vo_c2_Locus_32726_Transcript_2/2_Confidence_0.000_Length_696, vo_c1_Locus_22386_Transcript_1/2_Confidence_0.967_Length_2287, vo_c2_Locus_27372_Transcript_1/2_Confidence_0.969_Length_2448, vo_c2_Locus_6506_Transcript_2/2_Confidence_0.000_Length_692, vo_c3_Locus_24139_Transcript_1/2_Confidence_0.971_Length_2271, vo_n3_Locus_28820_Transcript_1/2_Confidence_0.950_Length_2237, vo_c2_Locus_13936_Transcript_11/19_Confidence_0.261_Length_294, tri_n_comp13578_c0_seq1, vo_n1_Locus_7847_Transcript_10/14_Confidence_0.579_Length_1000, vo_n2_Locus_711_Transcript_4/13_Confidence_0.474_Length_608, vo_c3_Locus_20156_Transcript_3/3_Confidence_0.000_Length_1297, vo_n2_Locus_711_Transcript_10/13_Confidence_0.316_Length_1285, vo_n2_Locus_711_Transcript_7/13_Confidence_0.474_Length_690, vo_c2_Locus_13936_Transcript_3/19_Confidence_0.435_Length_599, vo_n1_Locus_7847_Transcript_3/14_Confidence_0.105_Length_511, vo_n1_Locus_14248_Transcript_2/11_Confidence_0.333_Length_688, vo_c1_Locus_21075_Transcript_1/3_Confidence_0.500_Length_1034, vo_c2_Locus_2206_Transcript_1/2_Confidence_1.000_Length_1671, tri_c_comp13085_c0_seq3, tri_c_comp54583_c0_seq1, vo_c2_Locus_2427_Transcript_3/6_Confidence_0.455_Length_1530, vo_n2_Locus_12563_Transcript_1/1_Confidence_0.000_Length_1886, vo_n2_Locus_6619_Transcript_2/3_Confidence_0.571_Length_1613, vo_n1_Locus_3509_Transcript_2/2_Confidence_0.000_Length_1894, vo_n1_Locus_14248_Transcript_5/11_Confidence_0.222_Length_1040, vo_c2_Locus_3850_Transcript_1/4_Confidence_0.500_Length_2735, vo_c2_Locus_3850_Transcript_4/4_Confidence_0.250_Length_3514, vo_n2_Locus_1476_Transcript_2/3_Confidence_0.750_Length_1867, tri_n_comp18813_c0_seq13, vo_c2_Locus_23037_Transcript_2/2_Confidence_0.000_Length_2109, vo_n3_Locus_362_Transcript_3/4_Confidence_0.364_Length_3895, vo_n3_Locus_362_Transcript_1/4_Confidence_0.727_Length_3306, vo_n1_Locus_5208_Transcript_2/2_Confidence_0.000_Length_2077, vo_c2_Locus_23037_Transcript_1/2_Confidence_0.750_Length_1965, vo_n3_Locus_15336_Transcript_1/1_Confidence_0.000_Length_1810, vo_c1_Locus_13556_Transcript_2/2_Confidence_0.000_Length_1297, tri_c_comp22527_c0_seq1, vo_n1_Locus_10504_Transcript_1/2_Confidence_0.750_Length_1211, vo_c2_Locus_9062_Transcript_1/11_Confidence_0.312_Length_4797</p> |
|----------------------|----------|----|----------------------------------------------------------------------------------------------------------------------------------------------------------------------------------------------------------------------------------------------------------------------------------------------------------------------------------------------------------------------------------------------------------------------------------------------------------------------------------------------------------------------------------------------------------------------|-------------------------------------------|-----------------------------------------------------------------------------------------------------------------------------------------------------------------------------------------------------------------------------------------------------------------------------------------------------------------------------------------------------------------------------------------------------------------------------------------------------------------------------------------------------------------------------------------------------------------------------------------------------------------------------------------------------------------------------------------------------------------------------------------------------------------------------------------------------------------------------------------------------------------------------------------------------------------------------------------------------------------------------------------------------------------------------------------------------------------------------------------------------------------------------------------------------------------------------------------------------------------------------------------------------------------------------------------------------------------------------------------------------------------------------------------------------------------------------------------------------------------------------------------------------------------------------------------------------------------------------------------------------------------------------------------------------------------------------------------------------------------------------------------------------------------------------------------------------------------------------------------------------------------------------------------------------------------------------------------------------------------------------------------------------------------------------------------------------------------------------------------------------------------------------------------------------------------------------------------------------------------------------------------------------------------------------------------------------------------------------------------------------------------------------------------------------------------------------------------------------------------------------------------------------------------------------------------------------------------------------------------------------------------------------------------------------------------------------------------------------------------------------------------------------------------------------------------------------------------------------------------------------------------------------------------------------------------------------------------------------------------------------------------------------------------------------------------------------------------------------------------------------------------------------------------------------------------------------------------------------------------------------------------------------------------------------------------------------------------------------------------------------------------------------------------------------------------------------------------------------------------------------------------------------------------------------------------------------------------------------------------------------------------------------------------------------------------------------------------------------------------------------------------------------------------------------------------------------------------------------------------------------------------|

|                                            |          |    |                                                                                                                                                                                                                                                                                                                                                                                                                                                                              |                                                    |                                                                                                                                                                                                                                                                                                                                                                                                                                                                                                                                                                                                                                                                                                                                                                                                                                                                                                                                                                                                                                                                                                                                                                                                                                                                                                                                                                                                                                                                                                                                                                                                                                                                                                                                                                                                                                                                                                                                                                                                                                                                                                                                                                                                                                                                                                                                                                                                                                                                                                                                                                                                                                                                                                                                                                                                                                                                                                                                                                                                                                                                                                                                                                                                                                                                                                                                                                                                                                                                                                                                                                                                   |
|--------------------------------------------|----------|----|------------------------------------------------------------------------------------------------------------------------------------------------------------------------------------------------------------------------------------------------------------------------------------------------------------------------------------------------------------------------------------------------------------------------------------------------------------------------------|----------------------------------------------------|---------------------------------------------------------------------------------------------------------------------------------------------------------------------------------------------------------------------------------------------------------------------------------------------------------------------------------------------------------------------------------------------------------------------------------------------------------------------------------------------------------------------------------------------------------------------------------------------------------------------------------------------------------------------------------------------------------------------------------------------------------------------------------------------------------------------------------------------------------------------------------------------------------------------------------------------------------------------------------------------------------------------------------------------------------------------------------------------------------------------------------------------------------------------------------------------------------------------------------------------------------------------------------------------------------------------------------------------------------------------------------------------------------------------------------------------------------------------------------------------------------------------------------------------------------------------------------------------------------------------------------------------------------------------------------------------------------------------------------------------------------------------------------------------------------------------------------------------------------------------------------------------------------------------------------------------------------------------------------------------------------------------------------------------------------------------------------------------------------------------------------------------------------------------------------------------------------------------------------------------------------------------------------------------------------------------------------------------------------------------------------------------------------------------------------------------------------------------------------------------------------------------------------------------------------------------------------------------------------------------------------------------------------------------------------------------------------------------------------------------------------------------------------------------------------------------------------------------------------------------------------------------------------------------------------------------------------------------------------------------------------------------------------------------------------------------------------------------------------------------------------------------------------------------------------------------------------------------------------------------------------------------------------------------------------------------------------------------------------------------------------------------------------------------------------------------------------------------------------------------------------------------------------------------------------------------------------------------------|
| Pentose and glucurona te interconv ersions | map00040 | 14 | <p>ec:2.7.1.43 - glucuronokinase (phosphorylating), ec:1.1.1.2 - dehydrogenase (NADP+), ec:1.1.1.9 - reductase, ec:2.7.7.44 - uridylyltransferase, ec:2.4.1.17 - 1-naphthol glucuronyltransferase, ec:3.2.1.15 - pectin depolymerase, ec:5.1.3.1 - 3-epimerase, ec:2.7.7.9 - uridylyltransferase, ec:1.1.1.57 - reductase, ec:1.1.1.14 - 2-dehydrogenase, ec:1.1.1.12 - 4-dehydrogenase, ec:1.1.1.19 - reductase, ec:1.1.1.22 - 6-dehydrogenase, ec:1.1.1.21 - reductase</p> | <p>2, 10, 2, 5, 13, 8, 3, 10, 3, 3, 1, 2, 1, 4</p> | <p>tri_c_comp10536_c0_seq1, vo_c2_Locus_32726_Transcript_2/2_Confidence_0.000_Length_696, tri_c_comp11242_c0_seq2, tri_n_comp64914_c0_seq1, vo_c2_Locus_9062_Transcript_10/11_Confidence_0.312_Length_4945, vo_n2_Locus_22224_Transcript_1/1_Confidence_0.000_Length_1370, tri_n_comp14915_c0_seq1, vo_n3_Locus_15713_Transcript_4/7_Confidence_0.429_Length_2557, tri_c_comp37399_c0_seq1, tri_n_comp58061_c0_seq1, vo_n1_Locus_22736_Transcript_1/2_Confidence_0.333_Length_1213, vo_n2_Locus_19677_Transcript_1/1_Confidence_0.000_Length_2823, vo_c3_Locus_27324_Transcript_1/1_Confidence_0.000_Length_1468, vo_n3_Locus_17668_Transcript_1/2_Confidence_1.000_Length_1468, vo_n2_Locus_12563_Transcript_1/1_Confidence_0.000_Length_1886, vo_c1_Locus_21075_Transcript_1/3_Confidence_0.500_Length_1034, vo_n1_Locus_3509_Transcript_2/2_Confidence_0.000_Length_1894, tri_c_comp13085_c0_seq3, tri_c_comp54583_c0_seq1, tri_c_comp6209_c0_seq1, vo_c1_Locus_26340_Transcript_5/9_Confidence_0.600_Length_1699, tri_n_comp65990_c0_seq1, vo_n1_Locus_13372_Transcript_1/2_Confidence_0.333_Length_1687, vo_n2_Locus_34154_Transcript_3/3_Confidence_0.000_Length_2043, vo_n2_Locus_668_Transcript_17/17_Confidence_0.070_Length_2403, tri_c_comp58135_c0_seq1, vo_c3_Locus_16093_Transcript_1/1_Confidence_0.000_Length_1750, vo_n1_Locus_13372_Transcript_2/2_Confidence_0.000_Length_1314, vo_c2_Locus_24841_Transcript_3/3_Confidence_0.167_Length_3241, vo_n2_Locus_4774_Transcript_1/1_Confidence_0.000_Length_884, vo_c1_Locus_35615_Transcript_1/1_Confidence_0.000_Length_2075, vo_n1_Locus_15639_Transcript_1/1_Confidence_0.000_Length_1086, tri_c_comp19835_c0_seq11, tri_c_comp19835_c0_seq13, tri_c_comp19835_c0_seq5, vo_n1_Locus_29870_Transcript_1/5_Confidence_0.636_Length_1692, vo_c3_Locus_20087_Transcript_1/3_Confidence_0.714_Length_1659, vo_n3_Locus_5942_Transcript_1/1_Confidence_0.000_Length_2020, vo_c1_Locus_10150_Transcript_1/10_Confidence_0.429_Length_1713, tri_c_comp19835_c0_seq3, vo_n3_Locus_1573_Transcript_4/9_Confidence_0.364_Length_1074, vo_n2_Locus_3298_Transcript_6/11_Confidence_0.333_Length_1072, vo_n1_Locus_7783_Transcript_1/2_Confidence_0.667_Length_900, vo_n1_Locus_14248_Transcript_2/11_Confidence_0.333_Length_688, vo_c1_Locus_21075_Transcript_1/3_Confidence_0.500_Length_1034, vo_c2_Locus_2206_Transcript_1/2_Confidence_1.000_Length_1671, tri_c_comp13085_c0_seq3, tri_c_comp54583_c0_seq1, vo_c2_Locus_2427_Transcript_3/6_Confidence_0.455_Length_1530, vo_n2_Locus_12563_Transcript_1/1_Confidence_0.000_Length_1886, vo_n2_Locus_6619_Transcript_2/3_Confidence_0.571_Length_1613, vo_n1_Locus_3509_Transcript_2/2_Confidence_0.000_Length_1894, vo_n1_Locus_14248_Transcript_5/11_Confidence_0.222_Length_1040, vo_n1_Locus_13598_Transcript_3/3_Confidence_0.143_Length_1862, vo_c1_Locus_7476_Transcript_4/9_Confidence_0.667_Length_1739, vo_n1_Locus_13598_Transcript_1/3_Confidence_0.714_Length_1803, tri_n_comp61454_c0_seq1, vo_c3_Locus_27324_Transcript_1/1_Confidence_0.000_Length_1468, vo_n3_Locus_17668_Transcript_1/2_Confidence_1.000_Length_1468, tri_n_comp61454_c0_seq1, vo_c1_Locus_13556_Transcript_2/2_Confidence_0.000_Length_1297, vo_n1_Locus_10504_Transcript_1/2_Confidence_0.750_Length_1211, vo_c1_Locus_11739_Transcript_1/3_Confidence_0.929_Length_1730, vo_c1_Locus_13556_Transcript_2/2_Confidence_0.000_Length_1297, tri_c_comp22527_c0_seq1, vo_n1_Locus_10504_Transcript_1/2_Confidence_0.750_Length_1211, vo_c2_Locus_9062_Transcript_1/11_Confidence_0.312_Length_4797</p> |
|--------------------------------------------|----------|----|------------------------------------------------------------------------------------------------------------------------------------------------------------------------------------------------------------------------------------------------------------------------------------------------------------------------------------------------------------------------------------------------------------------------------------------------------------------------------|----------------------------------------------------|---------------------------------------------------------------------------------------------------------------------------------------------------------------------------------------------------------------------------------------------------------------------------------------------------------------------------------------------------------------------------------------------------------------------------------------------------------------------------------------------------------------------------------------------------------------------------------------------------------------------------------------------------------------------------------------------------------------------------------------------------------------------------------------------------------------------------------------------------------------------------------------------------------------------------------------------------------------------------------------------------------------------------------------------------------------------------------------------------------------------------------------------------------------------------------------------------------------------------------------------------------------------------------------------------------------------------------------------------------------------------------------------------------------------------------------------------------------------------------------------------------------------------------------------------------------------------------------------------------------------------------------------------------------------------------------------------------------------------------------------------------------------------------------------------------------------------------------------------------------------------------------------------------------------------------------------------------------------------------------------------------------------------------------------------------------------------------------------------------------------------------------------------------------------------------------------------------------------------------------------------------------------------------------------------------------------------------------------------------------------------------------------------------------------------------------------------------------------------------------------------------------------------------------------------------------------------------------------------------------------------------------------------------------------------------------------------------------------------------------------------------------------------------------------------------------------------------------------------------------------------------------------------------------------------------------------------------------------------------------------------------------------------------------------------------------------------------------------------------------------------------------------------------------------------------------------------------------------------------------------------------------------------------------------------------------------------------------------------------------------------------------------------------------------------------------------------------------------------------------------------------------------------------------------------------------------------------------------------|

|                                       |          |    |                                                                                                                                                                                                                                                                                                                                                                                                                                                            |                                                          |                                                                                                                                                                                                                                                                                                                                                                                                                                                                                                                                                                                                                                                                                                                                                                                                                                                                                                                                                                                                                                                                                                                                                                                                                                                                                                                                                                                                                                                                                                                                                                                                                                                                                                                                                                                                                                                                                                                                                                                                                                                                                                                                                                                                                                                                                                                                                                                                                                                                                                                                                                                                                                                                                                                                                                                                                                                                                                                                                                                                                                                                                                                                                                                                                                                                                                                                                                                                                                                                                                                                                                                                                                                                                                                                                                                                                                                                                                                                                                                                                                                                                                                                                                                                                                                                                                                                                                                                                                                                                                                                                                                                                                                                                                                                                                                                                                                                                                                                                                                                                                                                                                                                                                                                                                                                                                                                                                                                                                                                                                                                                                                                                                                                                                                                                                                                                                                                                                                                                                                                                                                                                                                                                                                                                                                                                                                                                                                                                                                                                                                                                                                                                                                                                                                                                                                                                                                                           |
|---------------------------------------|----------|----|------------------------------------------------------------------------------------------------------------------------------------------------------------------------------------------------------------------------------------------------------------------------------------------------------------------------------------------------------------------------------------------------------------------------------------------------------------|----------------------------------------------------------|---------------------------------------------------------------------------------------------------------------------------------------------------------------------------------------------------------------------------------------------------------------------------------------------------------------------------------------------------------------------------------------------------------------------------------------------------------------------------------------------------------------------------------------------------------------------------------------------------------------------------------------------------------------------------------------------------------------------------------------------------------------------------------------------------------------------------------------------------------------------------------------------------------------------------------------------------------------------------------------------------------------------------------------------------------------------------------------------------------------------------------------------------------------------------------------------------------------------------------------------------------------------------------------------------------------------------------------------------------------------------------------------------------------------------------------------------------------------------------------------------------------------------------------------------------------------------------------------------------------------------------------------------------------------------------------------------------------------------------------------------------------------------------------------------------------------------------------------------------------------------------------------------------------------------------------------------------------------------------------------------------------------------------------------------------------------------------------------------------------------------------------------------------------------------------------------------------------------------------------------------------------------------------------------------------------------------------------------------------------------------------------------------------------------------------------------------------------------------------------------------------------------------------------------------------------------------------------------------------------------------------------------------------------------------------------------------------------------------------------------------------------------------------------------------------------------------------------------------------------------------------------------------------------------------------------------------------------------------------------------------------------------------------------------------------------------------------------------------------------------------------------------------------------------------------------------------------------------------------------------------------------------------------------------------------------------------------------------------------------------------------------------------------------------------------------------------------------------------------------------------------------------------------------------------------------------------------------------------------------------------------------------------------------------------------------------------------------------------------------------------------------------------------------------------------------------------------------------------------------------------------------------------------------------------------------------------------------------------------------------------------------------------------------------------------------------------------------------------------------------------------------------------------------------------------------------------------------------------------------------------------------------------------------------------------------------------------------------------------------------------------------------------------------------------------------------------------------------------------------------------------------------------------------------------------------------------------------------------------------------------------------------------------------------------------------------------------------------------------------------------------------------------------------------------------------------------------------------------------------------------------------------------------------------------------------------------------------------------------------------------------------------------------------------------------------------------------------------------------------------------------------------------------------------------------------------------------------------------------------------------------------------------------------------------------------------------------------------------------------------------------------------------------------------------------------------------------------------------------------------------------------------------------------------------------------------------------------------------------------------------------------------------------------------------------------------------------------------------------------------------------------------------------------------------------------------------------------------------------------------------------------------------------------------------------------------------------------------------------------------------------------------------------------------------------------------------------------------------------------------------------------------------------------------------------------------------------------------------------------------------------------------------------------------------------------------------------------------------------------------------------------------------------------------------------------------------------------------------------------------------------------------------------------------------------------------------------------------------------------------------------------------------------------------------------------------------------------------------------------------------------------------------------------------------------------------------------------------------------------------------|
| Phosphatidylinositol signaling system | map04070 | 13 | <p>ec:2.7.1.107 - kinase (ATP),<br/> ec:2.7.1.127 - 3-kinase,<br/> ec:2.7.1.67 - 4-kinase,<br/> ec:2.7.1.68 - 5-kinase,<br/> ec:3.1.4.11 - phospholipase C,<br/> ec:2.7.1.137 - 3-kinase,<br/> ec:2.7.1.158 - 2-kinase,<br/> ec:2.7.11.13 - kinase C,<br/> ec:2.7.7.41 - cytidyltransferase,<br/> ec:3.1.3.56 - 5-phosphatase,<br/> ec:3.1.3.67 - 3-phosphatase,<br/> ec:3.1.3.64 - inositol-1,3-bisphosphate 3-phosphatase, ec:3.1.3.25 - phosphatase</p> | <p>9, 4, 1, 69,<br/> 2, 3, 1, 36,<br/> 1, 1, 4, 3, 5</p> | <p>tri_n_comp47452_c0_seq1, vo_c3_Locus_6073_Transcript_2/9_Confidence_0.467_Length_1975,<br/> vo_c2_Locus_6531_Transcript_1/1_Confidence_0.000_Length_1860, tri_c_comp37156_c0_seq1,<br/> vo_c1_Locus_17180_Transcript_1/1_Confidence_0.000_Length_4157, vo_c2_Locus_11596_Transcript_2/3_Confidence_0.167_Length_1499,<br/> vo_n2_Locus_6369_Transcript_1/1_Confidence_0.000_Length_1901, vo_n2_Locus_8637_Transcript_3/3_Confidence_0.000_Length_1561,<br/> vo_c3_Locus_6073_Transcript_3/9_Confidence_0.400_Length_2122, vo_c1_Locus_11471_Transcript_1/1_Confidence_0.000_Length_1552,<br/> vo_n1_Locus_10442_Transcript_2/3_Confidence_0.400_Length_4947, tri_n_comp57149_c0_seq1,<br/> vo_n3_Locus_25151_Transcript_2/2_Confidence_0.000_Length_2321, vo_c1_Locus_8439_Transcript_1/1_Confidence_0.000_Length_2856,<br/> vo_n2_Locus_10900_Transcript_7/8_Confidence_0.182_Length_1541, vo_c2_Locus_1347_Transcript_3/5_Confidence_0.500_Length_2327,<br/> vo_n2_Locus_22259_Transcript_6/9_Confidence_0.300_Length_1350, tri_n_comp34533_c0_seq1,<br/> vo_c2_Locus_16394_Transcript_1/3_Confidence_0.600_Length_1523, tri_n_comp47088_c0_seq1,<br/> vo_n2_Locus_5776_Transcript_2/5_Confidence_0.400_Length_1068, tri_n_comp20588_c0_seq18, tri_n_comp20588_c0_seq19,<br/> tri_n_comp20588_c0_seq17, tri_n_comp20588_c0_seq14, vo_c1_Locus_42275_Transcript_3/3_Confidence_0.556_Length_279,<br/> vo_c1_Locus_7030_Transcript_2/2_Confidence_0.000_Length_1330, tri_n_comp20588_c0_seq12,<br/> vo_n2_Locus_8440_Transcript_2/5_Confidence_0.375_Length_590, tri_c_comp22370_c0_seq1,<br/> vo_c2_Locus_8945_Transcript_5/8_Confidence_0.500_Length_1223, vo_n1_Locus_5753_Transcript_1/1_Confidence_0.000_Length_1679,<br/> vo_c3_Locus_7815_Transcript_4/6_Confidence_0.214_Length_985, tri_n_comp36241_c0_seq1,<br/> vo_c2_Locus_2278_Transcript_2/4_Confidence_0.556_Length_2279, tri_n_comp58246_c0_seq1,<br/> vo_n2_Locus_2705_Transcript_42/102_Confidence_0.021_Length_886, tri_n_comp20588_c0_seq8,<br/> vo_c1_Locus_1892_Transcript_3/5_Confidence_0.500_Length_2124, vo_c1_Locus_8772_Transcript_7/10_Confidence_0.235_Length_1211,<br/> vo_n2_Locus_6471_Transcript_2/29_Confidence_0.525_Length_5179, tri_c_comp32581_c0_seq1,<br/> vo_n3_Locus_32114_Transcript_2/2_Confidence_0.000_Length_539, vo_n2_Locus_20439_Transcript_1/1_Confidence_0.667_Length_1183,<br/> vo_c2_Locus_16479_Transcript_4/5_Confidence_0.500_Length_1223, vo_n2_Locus_6607_Transcript_2/3_Confidence_0.714_Length_1081,<br/> tri_c_comp33632_c0_seq1, vo_n2_Locus_29144_Transcript_1/1_Confidence_0.000_Length_1255, tri_c_comp34002_c0_seq1,<br/> vo_c2_Locus_13720_Transcript_3/4_Confidence_0.667_Length_997, vo_n2_Locus_6471_Transcript_7/29_Confidence_0.525_Length_5327,<br/> vo_n1_Locus_12692_Transcript_1/5_Confidence_0.286_Length_2909, vo_n3_Locus_22093_Transcript_2/2_Confidence_0.000_Length_372,<br/> vo_c2_Locus_5202_Transcript_1/2_Confidence_0.333_Length_647, tri_c_comp45302_c0_seq1,<br/> vo_n1_Locus_5719_Transcript_37/41_Confidence_0.500_Length_5524, tri_n_comp38041_c0_seq1,<br/> vo_c2_Locus_3016_Transcript_1/2_Confidence_1.000_Length_1686, vo_c3_Locus_7815_Transcript_5/6_Confidence_0.143_Length_1013,<br/> vo_c1_Locus_1170_Transcript_1/1_Confidence_0.000_Length_813, vo_n2_Locus_13406_Transcript_3/4_Confidence_0.667_Length_2171,<br/> vo_c3_Locus_3411_Transcript_3/5_Confidence_0.500_Length_2118, vo_c3_Locus_15968_Transcript_1/8_Confidence_0.019_Length_1026,<br/> tri_c_comp53370_c0_seq1, vo_c2_Locus_11572_Transcript_1/1_Confidence_0.000_Length_970, tri_n_comp52311_c0_seq1,<br/> vo_n2_Locus_13406_Transcript_4/4_Confidence_0.333_Length_2198, vo_c1_Locus_7030_Transcript_1/2_Confidence_0.750_Length_1255,<br/> vo_n1_Locus_16464_Transcript_1/2_Confidence_0.333_Length_1172, vo_n2_Locus_5776_Transcript_4/5_Confidence_0.200_Length_888,<br/> vo_c1_Locus_2471_Transcript_1/1_Confidence_0.000_Length_834, vo_n1_Locus_6857_Transcript_5/11_Confidence_0.556_Length_1705,<br/> vo_n2_Locus_9915_Transcript_1/1_Confidence_0.000_Length_1411, vo_c1_Locus_14433_Transcript_11/14_Confidence_0.294_Length_4956,<br/> vo_c2_Locus_502_Transcript_1/1_Confidence_0.000_Length_903, vo_c1_Locus_23583_Transcript_1/2_Confidence_0.333_Length_1107,<br/> vo_n2_Locus_1276_Transcript_1/2_Confidence_0.333_Length_497, tri_n_comp36227_c0_seq1, tri_n_comp39413_c0_seq1, tri_n_comp27385_c0_seq1,<br/> vo_c1_Locus_16332_Transcript_1/2_Confidence_0.333_Length_1029, vo_n1_Locus_11487_Transcript_3/3_Confidence_0.000_Length_568,<br/> vo_c2_Locus_2278_Transcript_4/4_Confidence_0.111_Length_2395, tri_n_comp9871_c0_seq1, tri_c_comp55877_c0_seq1,<br/> vo_n1_Locus_5560_Transcript_2/10_Confidence_0.136_Length_787, tri_n_comp56781_c0_seq1,<br/> vo_c1_Locus_8439_Transcript_1/1_Confidence_0.000_Length_2856, vo_n1_Locus_10442_Transcript_2/3_Confidence_0.400_Length_4947,<br/> vo_c1_Locus_22333_Transcript_11/14_Confidence_0.391_Length_2288, vo_n2_Locus_3054_Transcript_2/3_Confidence_0.333_Length_3045,<br/> tri_c_comp18638_c0_seq3, vo_c3_Locus_19291_Transcript_4/6_Confidence_0.250_Length_3644,<br/> vo_n1_Locus_5027_Transcript_2/4_Confidence_0.800_Length_3074, tri_c_comp12452_c0_seq2,<br/> vo_c3_Locus_4531_Transcript_1/2_Confidence_0.333_Length_3256, vo_c3_Locus_12823_Transcript_7/11_Confidence_0.150_Length_1099,<br/> vo_c1_Locus_6709_Transcript_2/10_Confidence_0.444_Length_1193, vo_c3_Locus_17253_Transcript_3/4_Confidence_0.375_Length_1433,<br/> tri_n_comp12148_c0_seq1, vo_c1_Locus_6477_Transcript_5/9_Confidence_0.235_Length_1167,<br/> vo_n2_Locus_1515_Transcript_15/24_Confidence_0.077_Length_1136, vo_c3_Locus_10023_Transcript_2/6_Confidence_0.125_Length_1290,<br/> vo_n2_Locus_1426_Transcript_22/28_Confidence_0.304_Length_1443, vo_c1_Locus_3372_Transcript_11/12_Confidence_0.350_Length_1415,<br/> vo_c1_Locus_6709_Transcript_7/10_Confidence_0.500_Length_1389, vo_c3_Locus_1810_Transcript_8/22_Confidence_0.262_Length_1483,<br/> vo_n2_Locus_19434_Transcript_1/2_Confidence_0.333_Length_3274, vo_n2_Locus_1426_Transcript_24/28_Confidence_0.304_Length_1547,<br/> vo_n1_Locus_3614_Transcript_4/8_Confidence_0.231_Length_1789, vo_n1_Locus_842_Transcript_34/37_Confidence_0.203_Length_1893,<br/> vo_n3_Locus_877_Transcript_3/5_Confidence_0.400_Length_1624, vo_c3_Locus_1810_Transcript_9/22_Confidence_0.262_Length_1447,<br/> vo_c1_Locus_2046_Transcript_1/1_Confidence_0.000_Length_2599, vo_c2_Locus_10357_Transcript_15/15_Confidence_0.045_Length_698,<br/> vo_c3_Locus_12823_Transcript_5/11_Confidence_0.200_Length_1070, vo_n1_Locus_3614_Transcript_2/8_Confidence_0.462_Length_2211,<br/> vo_c1_Locus_6709_Transcript_9/10_Confidence_0.278_Length_1468, vo_c2_Locus_16186_Transcript_7/8_Confidence_0.143_Length_2140,</p> |
|---------------------------------------|----------|----|------------------------------------------------------------------------------------------------------------------------------------------------------------------------------------------------------------------------------------------------------------------------------------------------------------------------------------------------------------------------------------------------------------------------------------------------------------|----------------------------------------------------------|---------------------------------------------------------------------------------------------------------------------------------------------------------------------------------------------------------------------------------------------------------------------------------------------------------------------------------------------------------------------------------------------------------------------------------------------------------------------------------------------------------------------------------------------------------------------------------------------------------------------------------------------------------------------------------------------------------------------------------------------------------------------------------------------------------------------------------------------------------------------------------------------------------------------------------------------------------------------------------------------------------------------------------------------------------------------------------------------------------------------------------------------------------------------------------------------------------------------------------------------------------------------------------------------------------------------------------------------------------------------------------------------------------------------------------------------------------------------------------------------------------------------------------------------------------------------------------------------------------------------------------------------------------------------------------------------------------------------------------------------------------------------------------------------------------------------------------------------------------------------------------------------------------------------------------------------------------------------------------------------------------------------------------------------------------------------------------------------------------------------------------------------------------------------------------------------------------------------------------------------------------------------------------------------------------------------------------------------------------------------------------------------------------------------------------------------------------------------------------------------------------------------------------------------------------------------------------------------------------------------------------------------------------------------------------------------------------------------------------------------------------------------------------------------------------------------------------------------------------------------------------------------------------------------------------------------------------------------------------------------------------------------------------------------------------------------------------------------------------------------------------------------------------------------------------------------------------------------------------------------------------------------------------------------------------------------------------------------------------------------------------------------------------------------------------------------------------------------------------------------------------------------------------------------------------------------------------------------------------------------------------------------------------------------------------------------------------------------------------------------------------------------------------------------------------------------------------------------------------------------------------------------------------------------------------------------------------------------------------------------------------------------------------------------------------------------------------------------------------------------------------------------------------------------------------------------------------------------------------------------------------------------------------------------------------------------------------------------------------------------------------------------------------------------------------------------------------------------------------------------------------------------------------------------------------------------------------------------------------------------------------------------------------------------------------------------------------------------------------------------------------------------------------------------------------------------------------------------------------------------------------------------------------------------------------------------------------------------------------------------------------------------------------------------------------------------------------------------------------------------------------------------------------------------------------------------------------------------------------------------------------------------------------------------------------------------------------------------------------------------------------------------------------------------------------------------------------------------------------------------------------------------------------------------------------------------------------------------------------------------------------------------------------------------------------------------------------------------------------------------------------------------------------------------------------------------------------------------------------------------------------------------------------------------------------------------------------------------------------------------------------------------------------------------------------------------------------------------------------------------------------------------------------------------------------------------------------------------------------------------------------------------------------------------------------------------------------------------------------------------------------------------------------------------------------------------------------------------------------------------------------------------------------------------------------------------------------------------------------------------------------------------------------------------------------------------------------------------------------------------------------------------------------------------------------------------------------------------------------------------------|

|  |  |  |  |  |                                                                                                                                                                                                                                                                                                                                                                                                                                                                                                                                                                                                                                                                                                                                                                                                                                                                                                                                                                                                                                                                                                                                                                                                                                                                                |
|--|--|--|--|--|--------------------------------------------------------------------------------------------------------------------------------------------------------------------------------------------------------------------------------------------------------------------------------------------------------------------------------------------------------------------------------------------------------------------------------------------------------------------------------------------------------------------------------------------------------------------------------------------------------------------------------------------------------------------------------------------------------------------------------------------------------------------------------------------------------------------------------------------------------------------------------------------------------------------------------------------------------------------------------------------------------------------------------------------------------------------------------------------------------------------------------------------------------------------------------------------------------------------------------------------------------------------------------|
|  |  |  |  |  | <p>vo_n1_Locus_842_Transcript_11/37_Confidence_0.188_Length_2091, vo_c3_Locus_1810_Transcript_17/22_Confidence_0.214_Length_1421, vo_n2_Locus_1426_Transcript_12/28_Confidence_0.370_Length_1887, vo_n2_Locus_1426_Transcript_16/28_Confidence_0.326_Length_1443, vo_n1_Locus_14687_Transcript_3/3_Confidence_0.200_Length_1029, vo_c3_Locus_1810_Transcript_5/22_Confidence_0.310_Length_1343, vo_c3_Locus_4113_Transcript_2/4_Confidence_0.500_Length_1659, vo_n3_Locus_9268_Transcript_2/3_Confidence_0.400_Length_3937, vo_n3_Locus_22682_Transcript_1/1_Confidence_0.000_Length_2879, tri_n_comp6659_c0_seq1, vo_n2_Locus_183_Transcript_39/101_Confidence_0.031_Length_2986, vo_n3_Locus_1224_Transcript_33/39_Confidence_0.173_Length_3279, vo_c1_Locus_25427_Transcript_1/1_Confidence_0.000_Length_2216, vo_n2_Locus_183_Transcript_39/101_Confidence_0.031_Length_2986, vo_n3_Locus_22682_Transcript_1/1_Confidence_0.000_Length_2879, vo_n2_Locus_24510_Transcript_1/1_Confidence_0.000_Length_1024, vo_c2_Locus_24561_Transcript_2/2_Confidence_0.000_Length_1596, vo_c2_Locus_24561_Transcript_1/2_Confidence_0.750_Length_1539, vo_c1_Locus_21354_Transcript_1/6_Confidence_0.600_Length_1404, vo_c2_Locus_13210_Transcript_4/4_Confidence_0.125_Length_1454</p> |
|--|--|--|--|--|--------------------------------------------------------------------------------------------------------------------------------------------------------------------------------------------------------------------------------------------------------------------------------------------------------------------------------------------------------------------------------------------------------------------------------------------------------------------------------------------------------------------------------------------------------------------------------------------------------------------------------------------------------------------------------------------------------------------------------------------------------------------------------------------------------------------------------------------------------------------------------------------------------------------------------------------------------------------------------------------------------------------------------------------------------------------------------------------------------------------------------------------------------------------------------------------------------------------------------------------------------------------------------|

|                                 |          |    |                                                                                                                                                                                                                                                                                                                                                                                                          |                                        |                                                                                                                                                                                                                                                                                                                                                                                                                                                                                                                                                                                                                                                                                                                                                                                                                                                                                                                                                                                                                                                                                                                                                                                                                                                                                                                                                                                                                                                                                                                                                                                                                                                                                                                                                                                                                                                                                                                                                                                                                                                                                                                                                                                                                                                                                                                                                                                                                                                                                                                                                                                                                                                                                                                                                                                                                                                                                                                                                                                                                                                                                                                                                                                                                                                                                                                                                                                                                                                                                                                                                                                                                                                                                                                                                                                                                                                                                                                                                                                                                                                                                                                                                                                                                                                                                                                                                                                                                                                                                                                                                                                                                                                                                                                                                                                                                                                                                                                                                                                                                                                                                                                                                                                                                                                                                                                                                                                                                                                                                                                                                                                                                                                                                                                                                                                                                                                                                                                                                                                                                                                                                                                                                                                                                                                                            |
|---------------------------------|----------|----|----------------------------------------------------------------------------------------------------------------------------------------------------------------------------------------------------------------------------------------------------------------------------------------------------------------------------------------------------------------------------------------------------------|----------------------------------------|----------------------------------------------------------------------------------------------------------------------------------------------------------------------------------------------------------------------------------------------------------------------------------------------------------------------------------------------------------------------------------------------------------------------------------------------------------------------------------------------------------------------------------------------------------------------------------------------------------------------------------------------------------------------------------------------------------------------------------------------------------------------------------------------------------------------------------------------------------------------------------------------------------------------------------------------------------------------------------------------------------------------------------------------------------------------------------------------------------------------------------------------------------------------------------------------------------------------------------------------------------------------------------------------------------------------------------------------------------------------------------------------------------------------------------------------------------------------------------------------------------------------------------------------------------------------------------------------------------------------------------------------------------------------------------------------------------------------------------------------------------------------------------------------------------------------------------------------------------------------------------------------------------------------------------------------------------------------------------------------------------------------------------------------------------------------------------------------------------------------------------------------------------------------------------------------------------------------------------------------------------------------------------------------------------------------------------------------------------------------------------------------------------------------------------------------------------------------------------------------------------------------------------------------------------------------------------------------------------------------------------------------------------------------------------------------------------------------------------------------------------------------------------------------------------------------------------------------------------------------------------------------------------------------------------------------------------------------------------------------------------------------------------------------------------------------------------------------------------------------------------------------------------------------------------------------------------------------------------------------------------------------------------------------------------------------------------------------------------------------------------------------------------------------------------------------------------------------------------------------------------------------------------------------------------------------------------------------------------------------------------------------------------------------------------------------------------------------------------------------------------------------------------------------------------------------------------------------------------------------------------------------------------------------------------------------------------------------------------------------------------------------------------------------------------------------------------------------------------------------------------------------------------------------------------------------------------------------------------------------------------------------------------------------------------------------------------------------------------------------------------------------------------------------------------------------------------------------------------------------------------------------------------------------------------------------------------------------------------------------------------------------------------------------------------------------------------------------------------------------------------------------------------------------------------------------------------------------------------------------------------------------------------------------------------------------------------------------------------------------------------------------------------------------------------------------------------------------------------------------------------------------------------------------------------------------------------------------------------------------------------------------------------------------------------------------------------------------------------------------------------------------------------------------------------------------------------------------------------------------------------------------------------------------------------------------------------------------------------------------------------------------------------------------------------------------------------------------------------------------------------------------------------------------------------------------------------------------------------------------------------------------------------------------------------------------------------------------------------------------------------------------------------------------------------------------------------------------------------------------------------------------------------------------------------------------------------------------------------------------------------------------------|
| Inositol phosphatase metabolism | map00562 | 13 | <p>ec:2.7.1.127 - 3-kinase, ec:2.7.1.67 - 4-kinase, ec:2.7.1.68 - 5-kinase, ec:3.1.4.11 - phospholipase C, ec:1.2.1.18 - dehydrogenase (acetylating), ec:2.7.1.137 - 3-kinase, ec:2.7.1.158 - 2-kinase, ec:5.3.1.1 - isomerase, ec:3.1.3.56 - 5-phosphatase, ec:3.1.3.67 - 3-phosphatase, ec:3.1.3.64 - inositol-1,3-bisphosphate 3-phosphatase, ec:3.1.3.25 - phosphatase, ec:1.13.99.1 - oxygenase</p> | 4, 1, 69, 2, 3, 3, 1, 9, 1, 4, 3, 5, 7 | <p>vo_c1_Locus_11471_Transcript_1/1_Confidence_0.000_Length_1552, vo_n1_Locus_10442_Transcript_2/3_Confidence_0.400_Length_4947, tri_n_comp57149_c0_seq1, vo_n3_Locus_25151_Transcript_2/2_Confidence_0.000_Length_2321, vo_c1_Locus_8439_Transcript_1/1_Confidence_0.000_Length_2856, vo_n2_Locus_10900_Transcript_7/8_Confidence_0.182_Length_1541, vo_c2_Locus_1347_Transcript_3/5_Confidence_0.500_Length_2327, vo_n2_Locus_22259_Transcript_6/9_Confidence_0.300_Length_1350, tri_n_comp34533_c0_seq1, vo_c2_Locus_16394_Transcript_1/3_Confidence_0.600_Length_1523, tri_n_comp47088_c0_seq1, vo_n2_Locus_5776_Transcript_2/5_Confidence_0.400_Length_1068, tri_n_comp20588_c0_seq18, tri_n_comp20588_c0_seq19, tri_n_comp20588_c0_seq17, tri_n_comp20588_c0_seq14, vo_c1_Locus_42275_Transcript_3/3_Confidence_0.556_Length_279, vo_c1_Locus_7030_Transcript_2/2_Confidence_0.000_Length_1330, tri_n_comp20588_c0_seq12, vo_n2_Locus_8440_Transcript_2/5_Confidence_0.375_Length_590, tri_c_comp22370_c0_seq1, vo_c2_Locus_8945_Transcript_5/8_Confidence_0.500_Length_1223, vo_n1_Locus_5753_Transcript_1/1_Confidence_0.000_Length_1679, vo_c3_Locus_7815_Transcript_4/6_Confidence_0.214_Length_985, tri_n_comp36241_c0_seq1, vo_c2_Locus_2278_Transcript_2/4_Confidence_0.556_Length_2279, tri_n_comp58246_c0_seq1, vo_n2_Locus_2705_Transcript_42/102_Confidence_0.021_Length_886, tri_n_comp20588_c0_seq8, vo_c1_Locus_1892_Transcript_3/5_Confidence_0.500_Length_2124, vo_c1_Locus_8772_Transcript_7/10_Confidence_0.235_Length_1211, vo_n2_Locus_6471_Transcript_2/29_Confidence_0.525_Length_5179, tri_c_comp32581_c0_seq1, vo_n3_Locus_32114_Transcript_2/2_Confidence_0.000_Length_539, vo_n2_Locus_20439_Transcript_1/1_Confidence_0.667_Length_1183, vo_c2_Locus_16479_Transcript_4/5_Confidence_0.500_Length_1223, vo_n2_Locus_6607_Transcript_2/3_Confidence_0.714_Length_1081, tri_c_comp33632_c0_seq1, vo_n2_Locus_29144_Transcript_1/1_Confidence_0.000_Length_1255, tri_c_comp34002_c0_seq1, vo_c2_Locus_13720_Transcript_3/4_Confidence_0.667_Length_997, vo_n2_Locus_6471_Transcript_7/29_Confidence_0.525_Length_5327, vo_n1_Locus_12692_Transcript_1/5_Confidence_0.286_Length_2909, vo_n3_Locus_22093_Transcript_2/2_Confidence_0.000_Length_372, vo_c2_Locus_5202_Transcript_1/2_Confidence_0.333_Length_647, tri_c_comp45302_c0_seq1, vo_n1_Locus_5719_Transcript_37/41_Confidence_0.500_Length_5524, tri_n_comp38041_c0_seq1, vo_c2_Locus_3016_Transcript_1/2_Confidence_1.000_Length_1686, vo_c3_Locus_7815_Transcript_5/6_Confidence_0.143_Length_1013, vo_c1_Locus_1170_Transcript_1/1_Confidence_0.000_Length_813, vo_n2_Locus_13406_Transcript_3/4_Confidence_0.667_Length_2171, vo_c3_Locus_3411_Transcript_3/5_Confidence_0.500_Length_2118, vo_c3_Locus_15968_Transcript_1/8_Confidence_0.019_Length_1026, tri_c_comp53370_c0_seq1, vo_c2_Locus_11572_Transcript_1/1_Confidence_0.000_Length_970, tri_n_comp52311_c0_seq1, vo_n2_Locus_13406_Transcript_4/4_Confidence_0.333_Length_2198, vo_n1_Locus_7030_Transcript_1/2_Confidence_0.750_Length_1255, vo_n1_Locus_16464_Transcript_1/2_Confidence_0.333_Length_1172, vo_n2_Locus_5776_Transcript_4/5_Confidence_0.200_Length_888, vo_c1_Locus_2471_Transcript_1/1_Confidence_0.000_Length_834, vo_n1_Locus_6857_Transcript_5/11_Confidence_0.556_Length_1705, vo_n2_Locus_9915_Transcript_1/1_Confidence_0.000_Length_1411, vo_c1_Locus_14433_Transcript_11/14_Confidence_0.294_Length_4956, vo_c2_Locus_502_Transcript_1/1_Confidence_0.000_Length_903, vo_c1_Locus_23583_Transcript_1/2_Confidence_0.333_Length_1107, vo_n2_Locus_1276_Transcript_1/2_Confidence_0.333_Length_497, tri_n_comp36227_c0_seq1, tri_n_comp39413_c0_seq1, tri_n_comp27385_c0_seq1, vo_c1_Locus_16332_Transcript_1/2_Confidence_0.333_Length_1029, vo_n1_Locus_11487_Transcript_3/3_Confidence_0.000_Length_568, vo_c2_Locus_2278_Transcript_4/4_Confidence_0.111_Length_2395, tri_n_comp9871_c0_seq1, tri_c_comp55877_c0_seq1, vo_c3_Locus_1581_Transcript_3/3_Confidence_0.000_Length_1736, vo_c1_Locus_1298_Transcript_3/6_Confidence_0.625_Length_1775, vo_n2_Locus_157_Transcript_2/4_Confidence_0.286_Length_2059, vo_n1_Locus_5560_Transcript_2/10_Confidence_0.136_Length_787, tri_n_comp56781_c0_seq1, vo_c1_Locus_8439_Transcript_1/1_Confidence_0.000_Length_2856, vo_n1_Locus_10442_Transcript_2/3_Confidence_0.400_Length_4947, vo_c2_Locus_3634_Transcript_8/8_Confidence_0.133_Length_2428, vo_c2_Locus_324_Transcript_5/12_Confidence_0.333_Length_1009, vo_n1_Locus_5721_Transcript_6/9_Confidence_0.389_Length_989, vo_c2_Locus_324_Transcript_11/12_Confidence_0.333_Length_4393, vo_n2_Locus_475_Transcript_7/13_Confidence_0.312_Length_1141, vo_n1_Locus_5721_Transcript_1/9_Confidence_0.278_Length_986, vo_n2_Locus_475_Transcript_2/13_Confidence_0.312_Length_1187, vo_c2_Locus_324_Transcript_2/12_Confidence_0.400_Length_1106, vo_c3_Locus_3927_Transcript_2/9_Confidence_0.250_Length_2629, vo_n3_Locus_9268_Transcript_2/3_Confidence_0.400_Length_3937, vo_n3_Locus_22682_Transcript_1/1_Confidence_0.000_Length_2879, tri_n_comp6659_c0_seq1, vo_n2_Locus_183_Transcript_39/101_Confidence_0.031_Length_2986, vo_n3_Locus_1224_Transcript_33/39_Confidence_0.173_Length_3279, vo_c1_Locus_25427_Transcript_1/1_Confidence_0.000_Length_2216, vo_n2_Locus_183_Transcript_39/101_Confidence_0.031_Length_2986, vo_n3_Locus_22682_Transcript_1/1_Confidence_0.000_Length_2879, vo_n2_Locus_24510_Transcript_1/1_Confidence_0.000_Length_1024, vo_c2_Locus_24561_Transcript_2/2_Confidence_0.000_Length_1596, vo_c2_Locus_24561_Transcript_1/2_Confidence_0.750_Length_1539, vo_c1_Locus_21354_Transcript_1/6_Confidence_0.600_Length_1404, vo_c2_Locus_13210_Transcript_4/4_Confidence_0.125_Length_1454, vo_c2_Locus_7343_Transcript_5/6_Confidence_0.333_Length_1107, vo_c1_Locus_16134_Transcript_10/12_Confidence_0.200_Length_544, vo_c3_Locus_9233_Transcript_4/5_Confidence_0.375_Length_1432, vo_c2_Locus_7343_Transcript_6/6_Confidence_0.083_Length_1098, vo_c1_Locus_16134_Transcript_6/12_Confidence_0.250_Length_448, vo_c1_Locus_16134_Transcript_8/12_Confidence_0.150_Length_721, vo_c1_Locus_16134_Transcript_7/12_Confidence_0.200_Length_748</p> |
|---------------------------------|----------|----|----------------------------------------------------------------------------------------------------------------------------------------------------------------------------------------------------------------------------------------------------------------------------------------------------------------------------------------------------------------------------------------------------------|----------------------------------------|----------------------------------------------------------------------------------------------------------------------------------------------------------------------------------------------------------------------------------------------------------------------------------------------------------------------------------------------------------------------------------------------------------------------------------------------------------------------------------------------------------------------------------------------------------------------------------------------------------------------------------------------------------------------------------------------------------------------------------------------------------------------------------------------------------------------------------------------------------------------------------------------------------------------------------------------------------------------------------------------------------------------------------------------------------------------------------------------------------------------------------------------------------------------------------------------------------------------------------------------------------------------------------------------------------------------------------------------------------------------------------------------------------------------------------------------------------------------------------------------------------------------------------------------------------------------------------------------------------------------------------------------------------------------------------------------------------------------------------------------------------------------------------------------------------------------------------------------------------------------------------------------------------------------------------------------------------------------------------------------------------------------------------------------------------------------------------------------------------------------------------------------------------------------------------------------------------------------------------------------------------------------------------------------------------------------------------------------------------------------------------------------------------------------------------------------------------------------------------------------------------------------------------------------------------------------------------------------------------------------------------------------------------------------------------------------------------------------------------------------------------------------------------------------------------------------------------------------------------------------------------------------------------------------------------------------------------------------------------------------------------------------------------------------------------------------------------------------------------------------------------------------------------------------------------------------------------------------------------------------------------------------------------------------------------------------------------------------------------------------------------------------------------------------------------------------------------------------------------------------------------------------------------------------------------------------------------------------------------------------------------------------------------------------------------------------------------------------------------------------------------------------------------------------------------------------------------------------------------------------------------------------------------------------------------------------------------------------------------------------------------------------------------------------------------------------------------------------------------------------------------------------------------------------------------------------------------------------------------------------------------------------------------------------------------------------------------------------------------------------------------------------------------------------------------------------------------------------------------------------------------------------------------------------------------------------------------------------------------------------------------------------------------------------------------------------------------------------------------------------------------------------------------------------------------------------------------------------------------------------------------------------------------------------------------------------------------------------------------------------------------------------------------------------------------------------------------------------------------------------------------------------------------------------------------------------------------------------------------------------------------------------------------------------------------------------------------------------------------------------------------------------------------------------------------------------------------------------------------------------------------------------------------------------------------------------------------------------------------------------------------------------------------------------------------------------------------------------------------------------------------------------------------------------------------------------------------------------------------------------------------------------------------------------------------------------------------------------------------------------------------------------------------------------------------------------------------------------------------------------------------------------------------------------------------------------------------------------------------------------------------------------------|



|                                          |                 |           |                                                                                                                                                                                                                                                                                                                                                                                                                                          |                                                        |                                                                                                                                                                                                                                                                                                                                                                                                                                                                                                                                                                                                                                                                                                                                                                                                                                                                                                                                                                                                                                                                                                                                                                                                                                                                                                                                                                                                                                                                                                                                                                                                                                                                                                                                                                                                                                                              |
|------------------------------------------|-----------------|-----------|------------------------------------------------------------------------------------------------------------------------------------------------------------------------------------------------------------------------------------------------------------------------------------------------------------------------------------------------------------------------------------------------------------------------------------------|--------------------------------------------------------|--------------------------------------------------------------------------------------------------------------------------------------------------------------------------------------------------------------------------------------------------------------------------------------------------------------------------------------------------------------------------------------------------------------------------------------------------------------------------------------------------------------------------------------------------------------------------------------------------------------------------------------------------------------------------------------------------------------------------------------------------------------------------------------------------------------------------------------------------------------------------------------------------------------------------------------------------------------------------------------------------------------------------------------------------------------------------------------------------------------------------------------------------------------------------------------------------------------------------------------------------------------------------------------------------------------------------------------------------------------------------------------------------------------------------------------------------------------------------------------------------------------------------------------------------------------------------------------------------------------------------------------------------------------------------------------------------------------------------------------------------------------------------------------------------------------------------------------------------------------|
| <p>Pantothenate and CoA biosynthesis</p> | <p>map00770</p> | <p>13</p> | <p>ec:4.1.1.36 - decarboxylase,<br/> ec:2.2.1.6 - synthase,<br/> ec:2.7.1.33 - kinase,<br/> ec:2.6.1.42 - transaminase,<br/> ec:2.7.1.24 - kinase,<br/> ec:2.7.8.7 - synthase,<br/> ec:1.1.1.169 - 2-reductase,<br/> ec:3.6.1.9 - diphosphatase,<br/> ec:4.2.1.9 - dehydratase,<br/> ec:6.3.2.5 - ligase, ec:2.7.7.3 - adenylyltransferase,<br/> ec:2.1.2.11 - hydroxymethyltransferase,<br/> ec:1.1.1.86 - reductoisomerase (NADP+)</p> | <p>1, 1, 2, 6,<br/> 1, 4, 1, 7,<br/> 2, 1, 1, 3, 1</p> | <p>vo_n1_Locus_30711_Transcript_1/1_Confidence_0.000_Length_904, tri_n_comp26150_c0_seq1,<br/> vo_c2_Locus_25467_Transcript_3/4_Confidence_0.500_Length_2039, tri_c_comp48007_c0_seq1,<br/> vo_c2_Locus_384_Transcript_2/3_Confidence_0.400_Length_1725, tri_c_comp32679_c0_seq1,<br/> vo_c1_Locus_10788_Transcript_1/1_Confidence_0.000_Length_1721, vo_c2_Locus_14969_Transcript_4/8_Confidence_0.750_Length_1231,<br/> vo_n2_Locus_3786_Transcript_2/4_Confidence_0.778_Length_1466, vo_n2_Locus_3786_Transcript_3/4_Confidence_0.667_Length_1442,<br/> tri_n_comp6551_c0_seq1, vo_c3_Locus_3787_Transcript_1/1_Confidence_0.000_Length_1203,<br/> vo_c1_Locus_5370_Transcript_6/6_Confidence_0.333_Length_1849, vo_c1_Locus_22861_Transcript_1/1_Confidence_0.000_Length_1500,<br/> vo_c1_Locus_5370_Transcript_4/6_Confidence_0.267_Length_1370, vo_c3_Locus_23517_Transcript_1/1_Confidence_0.000_Length_1261,<br/> vo_c2_Locus_35825_Transcript_1/2_Confidence_0.500_Length_995, vo_c2_Locus_35825_Transcript_2/2_Confidence_0.000_Length_972,<br/> tri_n_comp34093_c0_seq1, vo_c2_Locus_11939_Transcript_1/4_Confidence_0.273_Length_1336,<br/> vo_c1_Locus_18906_Transcript_3/4_Confidence_0.400_Length_1298, vo_c2_Locus_26280_Transcript_1/1_Confidence_0.000_Length_1316,<br/> vo_c1_Locus_31652_Transcript_2/3_Confidence_0.429_Length_964, vo_n1_Locus_12155_Transcript_1/2_Confidence_0.500_Length_2024,<br/> vo_n2_Locus_484_Transcript_2/3_Confidence_0.333_Length_2007, vo_n2_Locus_16404_Transcript_1/2_Confidence_1.000_Length_1226,<br/> tri_c_comp39996_c0_seq1, vo_c1_Locus_6318_Transcript_9/9_Confidence_0.182_Length_1477,<br/> vo_c3_Locus_17424_Transcript_2/4_Confidence_0.400_Length_1582, vo_n2_Locus_3835_Transcript_3/4_Confidence_0.600_Length_1293,<br/> vo_n2_Locus_4139_Transcript_1/1_Confidence_0.000_Length_1669</p> |
|------------------------------------------|-----------------|-----------|------------------------------------------------------------------------------------------------------------------------------------------------------------------------------------------------------------------------------------------------------------------------------------------------------------------------------------------------------------------------------------------------------------------------------------------|--------------------------------------------------------|--------------------------------------------------------------------------------------------------------------------------------------------------------------------------------------------------------------------------------------------------------------------------------------------------------------------------------------------------------------------------------------------------------------------------------------------------------------------------------------------------------------------------------------------------------------------------------------------------------------------------------------------------------------------------------------------------------------------------------------------------------------------------------------------------------------------------------------------------------------------------------------------------------------------------------------------------------------------------------------------------------------------------------------------------------------------------------------------------------------------------------------------------------------------------------------------------------------------------------------------------------------------------------------------------------------------------------------------------------------------------------------------------------------------------------------------------------------------------------------------------------------------------------------------------------------------------------------------------------------------------------------------------------------------------------------------------------------------------------------------------------------------------------------------------------------------------------------------------------------|

|                                        |          |    |                                                                                                                                                                                                                                                                                                                                                                                                                                                                           |                                         |                                                                                                                                                                                                                                                                                                                                                                                                                                                                                                                                                                                                                                                                                                                                                                                                                                                                                                                                                                                                                                                                                                                                                                                                                                                                                                                                                                                                                                                                                                                                                                                                                                                                                                                                                                                                                                                                                                                                                                                                                                                                                                                                                                                                                                                                                                                                                                                                                                                                                                                                                                                                                               |
|----------------------------------------|----------|----|---------------------------------------------------------------------------------------------------------------------------------------------------------------------------------------------------------------------------------------------------------------------------------------------------------------------------------------------------------------------------------------------------------------------------------------------------------------------------|-----------------------------------------|-------------------------------------------------------------------------------------------------------------------------------------------------------------------------------------------------------------------------------------------------------------------------------------------------------------------------------------------------------------------------------------------------------------------------------------------------------------------------------------------------------------------------------------------------------------------------------------------------------------------------------------------------------------------------------------------------------------------------------------------------------------------------------------------------------------------------------------------------------------------------------------------------------------------------------------------------------------------------------------------------------------------------------------------------------------------------------------------------------------------------------------------------------------------------------------------------------------------------------------------------------------------------------------------------------------------------------------------------------------------------------------------------------------------------------------------------------------------------------------------------------------------------------------------------------------------------------------------------------------------------------------------------------------------------------------------------------------------------------------------------------------------------------------------------------------------------------------------------------------------------------------------------------------------------------------------------------------------------------------------------------------------------------------------------------------------------------------------------------------------------------------------------------------------------------------------------------------------------------------------------------------------------------------------------------------------------------------------------------------------------------------------------------------------------------------------------------------------------------------------------------------------------------------------------------------------------------------------------------------------------------|
| Nicotinate and nicotinamide metabolism | map00760 | 13 | <p>ec:1.2.1.24 - dehydrogenase (NAD+), ec:2.7.1.23 - kinase, ec:2.7.1.22 - kinase, ec:1.2.1.16 - dehydrogenase [NAD(P)+], ec:3.1.3.5 - uridine 5'-nucleotidase, ec:5.3.3.6 - Delta-isomerase, ec:1.6.1.1 - transhydrogenase (Si-specific), ec:1.6.1.2 - transhydrogenase (Re/Si-specific), ec:3.6.1.9 - diphosphatase, ec:1.4.1.21 - dehydrogenase, ec:3.2.2.1 - nucleosidase, ec:2.4.2.19 - diphosphorylase (carboxylating), ec:2.4.2.12 - phosphoribosyltransferase</p> | 1, 10, 2, 1, 11, 1, 3, 3, 7, 1, 1, 2, 2 | <p>vo_c1_Locus_24159_Transcript_1/2_Confidence_0.333_Length_1573, tri_n_comp47452_c0_seq1, vo_c3_Locus_6073_Transcript_2/9_Confidence_0.467_Length_1975, vo_c2_Locus_6531_Transcript_1/1_Confidence_0.000_Length_1860, tri_c_comp37156_c0_seq1, vo_c1_Locus_17180_Transcript_1/1_Confidence_0.000_Length_4157, vo_c2_Locus_11596_Transcript_2/3_Confidence_0.167_Length_1499, vo_n2_Locus_6369_Transcript_1/1_Confidence_0.000_Length_1901, vo_n2_Locus_8637_Transcript_3/3_Confidence_0.000_Length_1561, vo_n2_Locus_4220_Transcript_2/4_Confidence_0.400_Length_1659, vo_c3_Locus_6073_Transcript_3/9_Confidence_0.400_Length_2122, vo_c3_Locus_8424_Transcript_2/2_Confidence_0.000_Length_1147, tri_n_comp69389_c0_seq1, vo_c1_Locus_24159_Transcript_1/2_Confidence_0.333_Length_1573, vo_c1_Locus_21072_Transcript_1/1_Confidence_0.000_Length_965, vo_c2_Locus_25862_Transcript_4/4_Confidence_0.000_Length_988, vo_c2_Locus_26482_Transcript_5/6_Confidence_0.286_Length_1654, vo_c2_Locus_26482_Transcript_4/6_Confidence_0.571_Length_1609, vo_n2_Locus_21191_Transcript_4/6_Confidence_0.300_Length_1691, vo_c1_Locus_18480_Transcript_2/2_Confidence_0.000_Length_1013, vo_c2_Locus_27118_Transcript_12/49_Confidence_0.025_Length_3122, vo_c2_Locus_6520_Transcript_5/15_Confidence_0.455_Length_1419, vo_c3_Locus_7168_Transcript_5/8_Confidence_0.538_Length_1343, vo_n1_Locus_7057_Transcript_3/15_Confidence_0.611_Length_1294, vo_n2_Locus_21191_Transcript_3/6_Confidence_0.500_Length_1646, vo_c1_Locus_22176_Transcript_1/1_Confidence_0.000_Length_1558, vo_n2_Locus_10341_Transcript_2/3_Confidence_0.333_Length_4122, tri_n_comp26117_c0_seq1, vo_n3_Locus_586_Transcript_15/30_Confidence_0.217_Length_1490, vo_n2_Locus_10341_Transcript_2/3_Confidence_0.333_Length_4122, tri_n_comp26117_c0_seq1, vo_n3_Locus_586_Transcript_15/30_Confidence_0.217_Length_1490, vo_c2_Locus_35825_Transcript_1/2_Confidence_0.500_Length_995, vo_c2_Locus_35825_Transcript_2/2_Confidence_0.000_Length_972, tri_n_comp34093_c0_seq1, vo_c2_Locus_11939_Transcript_1/4_Confidence_0.273_Length_1336, vo_c1_Locus_18906_Transcript_3/4_Confidence_0.400_Length_1298, vo_c2_Locus_26280_Transcript_1/1_Confidence_0.000_Length_1316, vo_c1_Locus_31652_Transcript_2/3_Confidence_0.429_Length_964, vo_c1_Locus_38689_Transcript_2/2_Confidence_0.000_Length_1212, vo_n1_Locus_31937_Transcript_5/5_Confidence_0.125_Length_1141, vo_c2_Locus_20360_Transcript_1/1_Confidence_0.000_Length_1892, tri_c_comp24450_c0_seq1, vo_c2_Locus_20360_Transcript_1/1_Confidence_0.000_Length_1892, tri_c_comp24450_c0_seq1</p> |
|----------------------------------------|----------|----|---------------------------------------------------------------------------------------------------------------------------------------------------------------------------------------------------------------------------------------------------------------------------------------------------------------------------------------------------------------------------------------------------------------------------------------------------------------------------|-----------------------------------------|-------------------------------------------------------------------------------------------------------------------------------------------------------------------------------------------------------------------------------------------------------------------------------------------------------------------------------------------------------------------------------------------------------------------------------------------------------------------------------------------------------------------------------------------------------------------------------------------------------------------------------------------------------------------------------------------------------------------------------------------------------------------------------------------------------------------------------------------------------------------------------------------------------------------------------------------------------------------------------------------------------------------------------------------------------------------------------------------------------------------------------------------------------------------------------------------------------------------------------------------------------------------------------------------------------------------------------------------------------------------------------------------------------------------------------------------------------------------------------------------------------------------------------------------------------------------------------------------------------------------------------------------------------------------------------------------------------------------------------------------------------------------------------------------------------------------------------------------------------------------------------------------------------------------------------------------------------------------------------------------------------------------------------------------------------------------------------------------------------------------------------------------------------------------------------------------------------------------------------------------------------------------------------------------------------------------------------------------------------------------------------------------------------------------------------------------------------------------------------------------------------------------------------------------------------------------------------------------------------------------------------|

|                       |          |    |                                                                                                                                                                                                                                                                                                                                                                                                                                               |                                                         |                                                                                                                                                                                                                                                                                                                                                                                                                                                                                                                                                                                                                                                                                                                                                                                                                                                                                                                                                                                                                                                                                                                                                                                                                                                                                                                                                                                                                                                                                                                                                                                                                                                                                                                                                                                                                                                                                                                                                                                                                                                                                                                                                                                                                                                             |
|-----------------------|----------|----|-----------------------------------------------------------------------------------------------------------------------------------------------------------------------------------------------------------------------------------------------------------------------------------------------------------------------------------------------------------------------------------------------------------------------------------------------|---------------------------------------------------------|-------------------------------------------------------------------------------------------------------------------------------------------------------------------------------------------------------------------------------------------------------------------------------------------------------------------------------------------------------------------------------------------------------------------------------------------------------------------------------------------------------------------------------------------------------------------------------------------------------------------------------------------------------------------------------------------------------------------------------------------------------------------------------------------------------------------------------------------------------------------------------------------------------------------------------------------------------------------------------------------------------------------------------------------------------------------------------------------------------------------------------------------------------------------------------------------------------------------------------------------------------------------------------------------------------------------------------------------------------------------------------------------------------------------------------------------------------------------------------------------------------------------------------------------------------------------------------------------------------------------------------------------------------------------------------------------------------------------------------------------------------------------------------------------------------------------------------------------------------------------------------------------------------------------------------------------------------------------------------------------------------------------------------------------------------------------------------------------------------------------------------------------------------------------------------------------------------------------------------------------------------------|
| Arginine biosynthesis | map00220 | 13 | <p>ec:2.6.1.11 - transaminase,<br/> ec:6.3.1.2 - synthetase,<br/> ec:4.3.2.1 - lyase,<br/> ec:1.2.1.38 - reductase,<br/> ec:2.6.1.1 - transaminase,<br/> ec:3.5.1.14 - acid amidohydrolase, ec:2.3.1.1 - N-acetyltransferase,<br/> ec:1.4.1.2 - dehydrogenase,<br/> ec:3.5.1.5 - ec:3.5.1.5 urease, ec:6.3.4.5 - synthase, ec:3.5.3.1 - arginine amidinase,<br/> ec:2.3.1.35 - N-acetyltransferase,<br/> ec:6.3.4.16 - synthase (ammonia)</p> | <p>4, 15, 1, 4,<br/> 4, 2, 1, 1,<br/> 1, 1, 1, 2, 2</p> | <p>vo_c3_Locus_29526_Transcript_7/10_Confidence_0.268_Length_874, vo_n2_Locus_6432_Transcript_1/2_Confidence_0.667_Length_1653, vo_n2_Locus_3256_Transcript_3/4_Confidence_0.250_Length_4070, vo_c1_Locus_5351_Transcript_2/2_Confidence_0.333_Length_1693, vo_c1_Locus_1340_Transcript_12/17_Confidence_0.109_Length_2389, vo_c1_Locus_1340_Transcript_9/17_Confidence_0.172_Length_2429, tri_n_comp11684_c0_seq1, vo_c1_Locus_4136_Transcript_1/2_Confidence_0.967_Length_2259, vo_c2_Locus_6408_Transcript_2/14_Confidence_0.268_Length_1478, vo_n1_Locus_335_Transcript_2/3_Confidence_0.909_Length_2286, vo_c2_Locus_3512_Transcript_3/4_Confidence_0.500_Length_2501, vo_n2_Locus_4820_Transcript_2/3_Confidence_0.545_Length_2376, vo_n3_Locus_2644_Transcript_11/11_Confidence_0.323_Length_2390, vo_n2_Locus_515_Transcript_8/9_Confidence_0.471_Length_3194, vo_n2_Locus_515_Transcript_7/9_Confidence_0.176_Length_2355, vo_c2_Locus_3512_Transcript_2/4_Confidence_0.750_Length_2320, vo_c3_Locus_1501_Transcript_6/9_Confidence_0.203_Length_2420, vo_n2_Locus_5127_Transcript_1/3_Confidence_0.200_Length_1636, vo_n2_Locus_22912_Transcript_1/2_Confidence_0.333_Length_2481, vo_c2_Locus_18300_Transcript_2/3_Confidence_0.200_Length_1671, vo_n2_Locus_3068_Transcript_2/3_Confidence_0.250_Length_1991, vo_n1_Locus_4025_Transcript_3/5_Confidence_0.286_Length_3475, vo_c1_Locus_9004_Transcript_2/4_Confidence_0.400_Length_3537, vo_c1_Locus_10440_Transcript_1/2_Confidence_0.667_Length_1569, vo_n1_Locus_3423_Transcript_2/4_Confidence_0.250_Length_1347, tri_n_comp27683_c0_seq1, vo_c1_Locus_3127_Transcript_1/1_Confidence_0.000_Length_1478, vo_n1_Locus_3423_Transcript_3/4_Confidence_0.250_Length_1416, tri_c_comp31460_c0_seq1, vo_n2_Locus_4794_Transcript_3/3_Confidence_0.000_Length_966, vo_n2_Locus_4233_Transcript_1/2_Confidence_1.000_Length_2049, tri_c_comp28026_c0_seq1, tri_c_comp36137_c0_seq1, vo_c2_Locus_2824_Transcript_1/6_Confidence_0.533_Length_1586, vo_c2_Locus_4334_Transcript_2/31_Confidence_0.064_Length_1982, tri_c_comp38766_c0_seq1, vo_c3_Locus_3449_Transcript_3/3_Confidence_0.000_Length_1945, tri_c_comp33901_c0_seq1, vo_n2_Locus_5805_Transcript_1/2_Confidence_0.333_Length_5227</p> |
|-----------------------|----------|----|-----------------------------------------------------------------------------------------------------------------------------------------------------------------------------------------------------------------------------------------------------------------------------------------------------------------------------------------------------------------------------------------------------------------------------------------------|---------------------------------------------------------|-------------------------------------------------------------------------------------------------------------------------------------------------------------------------------------------------------------------------------------------------------------------------------------------------------------------------------------------------------------------------------------------------------------------------------------------------------------------------------------------------------------------------------------------------------------------------------------------------------------------------------------------------------------------------------------------------------------------------------------------------------------------------------------------------------------------------------------------------------------------------------------------------------------------------------------------------------------------------------------------------------------------------------------------------------------------------------------------------------------------------------------------------------------------------------------------------------------------------------------------------------------------------------------------------------------------------------------------------------------------------------------------------------------------------------------------------------------------------------------------------------------------------------------------------------------------------------------------------------------------------------------------------------------------------------------------------------------------------------------------------------------------------------------------------------------------------------------------------------------------------------------------------------------------------------------------------------------------------------------------------------------------------------------------------------------------------------------------------------------------------------------------------------------------------------------------------------------------------------------------------------------|

|                          |          |    |                                                                                                                                                                                                                                                                                                                                                                                                                              |                                                         |                                                                                                                                                                                                                                                                                                                                                                                                                                                                                                                                                                                                                                                                                                                                                                                                                                                                                                                                                                                                                                                                                                                                                                                                                                                                                                                                                                                                                                                                                                                                                                                                                                                                                                                                                                                                                                                                                                                                                                                                                                                                                                                                                                                                                                                                                                                                                                                                                                                                                                                                                                                                                                                                                                                                                                                                                                                                                                                                                                                                                                                                                                                                                                                                                                                                                                                                             |
|--------------------------|----------|----|------------------------------------------------------------------------------------------------------------------------------------------------------------------------------------------------------------------------------------------------------------------------------------------------------------------------------------------------------------------------------------------------------------------------------|---------------------------------------------------------|---------------------------------------------------------------------------------------------------------------------------------------------------------------------------------------------------------------------------------------------------------------------------------------------------------------------------------------------------------------------------------------------------------------------------------------------------------------------------------------------------------------------------------------------------------------------------------------------------------------------------------------------------------------------------------------------------------------------------------------------------------------------------------------------------------------------------------------------------------------------------------------------------------------------------------------------------------------------------------------------------------------------------------------------------------------------------------------------------------------------------------------------------------------------------------------------------------------------------------------------------------------------------------------------------------------------------------------------------------------------------------------------------------------------------------------------------------------------------------------------------------------------------------------------------------------------------------------------------------------------------------------------------------------------------------------------------------------------------------------------------------------------------------------------------------------------------------------------------------------------------------------------------------------------------------------------------------------------------------------------------------------------------------------------------------------------------------------------------------------------------------------------------------------------------------------------------------------------------------------------------------------------------------------------------------------------------------------------------------------------------------------------------------------------------------------------------------------------------------------------------------------------------------------------------------------------------------------------------------------------------------------------------------------------------------------------------------------------------------------------------------------------------------------------------------------------------------------------------------------------------------------------------------------------------------------------------------------------------------------------------------------------------------------------------------------------------------------------------------------------------------------------------------------------------------------------------------------------------------------------------------------------------------------------------------------------------------------------|
| Glycerolip id metabolism | map00561 | 13 | <p>ec:2.7.1.107 - kinase (ATP),<br/> ec:2.7.1.29 - kinase,<br/> ec:2.3.1.158 - acyltransferase, ec:3.1.1.3 - lipase, ec:1.1.1.2 - dehydrogenase (NADP+),<br/> ec:1.2.1.3 - dehydrogenase (NAD+), ec:3.2.1.22 - melibiase, ec:2.3.1.20 - O-acyltransferase, ec:2.3.1.22 - O-acyltransferase, ec:2.3.1.51 - O-acyltransferase, ec:2.4.1.184 - galactosyltransferase, ec:1.1.1.202 - dehydrogenase, ec:1.1.1.21 - reductase</p> | <p>9, 2, 2, 2,<br/> 10, 5, 5, 8,<br/> 6, 2, 2, 1, 4</p> | <p>tri_n_comp47452_c0_seq1, vo_c3_Locus_6073_Transcript_2/9_Confidence_0.467_Length_1975,<br/> vo_c2_Locus_6531_Transcript_1/1_Confidence_0.000_Length_1860, tri_c_comp37156_c0_seq1,<br/> vo_c1_Locus_17180_Transcript_1/1_Confidence_0.000_Length_4157, vo_c2_Locus_11596_Transcript_2/3_Confidence_0.167_Length_1499,<br/> vo_n2_Locus_6369_Transcript_1/1_Confidence_0.000_Length_1901, vo_n2_Locus_8637_Transcript_3/3_Confidence_0.000_Length_1561,<br/> vo_c3_Locus_6073_Transcript_3/9_Confidence_0.400_Length_2122, vo_n1_Locus_15871_Transcript_1/1_Confidence_0.000_Length_1944,<br/> vo_c2_Locus_10095_Transcript_1/4_Confidence_0.286_Length_4859, vo_n3_Locus_25849_Transcript_1/7_Confidence_0.421_Length_1317,<br/> vo_c1_Locus_2758_Transcript_9/10_Confidence_0.267_Length_1451, tri_c_comp14506_c0_seq1,<br/> vo_n2_Locus_16855_Transcript_8/9_Confidence_0.636_Length_2285, tri_c_comp11242_c0_seq2, tri_n_comp64914_c0_seq1,<br/> vo_c2_Locus_9062_Transcript_10/11_Confidence_0.312_Length_4945, vo_n2_Locus_22224_Transcript_1/1_Confidence_0.000_Length_1370,<br/> tri_n_comp14915_c0_seq1, vo_n3_Locus_15713_Transcript_4/7_Confidence_0.429_Length_2557, tri_c_comp37399_c0_seq1,<br/> tri_n_comp58061_c0_seq1, vo_n1_Locus_22736_Transcript_1/2_Confidence_0.333_Length_1213,<br/> vo_n2_Locus_19677_Transcript_1/1_Confidence_0.000_Length_2823, tri_c_comp55340_c0_seq1,<br/> vo_n1_Locus_19864_Transcript_2/2_Confidence_0.000_Length_2707, vo_c3_Locus_21741_Transcript_5/9_Confidence_0.583_Length_1757,<br/> vo_n3_Locus_25600_Transcript_5/6_Confidence_0.375_Length_1777, tri_n_comp58061_c0_seq1,<br/> vo_c2_Locus_17150_Transcript_58/102_Confidence_0.019_Length_2519, vo_n2_Locus_11259_Transcript_1/2_Confidence_0.333_Length_2880,<br/> tri_c_comp44396_c0_seq1, vo_n2_Locus_31986_Transcript_2/2_Confidence_0.333_Length_2185,<br/> vo_n2_Locus_20375_Transcript_1/2_Confidence_0.333_Length_1577, vo_c2_Locus_1239_Transcript_4/4_Confidence_0.000_Length_1343,<br/> vo_n1_Locus_12743_Transcript_2/2_Confidence_0.000_Length_633, tri_c_comp9226_c0_seq1, tri_n_comp38992_c0_seq1,<br/> vo_n3_Locus_16690_Transcript_3/4_Confidence_0.667_Length_408, vo_n2_Locus_19192_Transcript_2/2_Confidence_0.250_Length_3053,<br/> vo_c2_Locus_16114_Transcript_1/1_Confidence_0.000_Length_1890, vo_n1_Locus_1454_Transcript_3/3_Confidence_0.000_Length_612,<br/> vo_c2_Locus_1239_Transcript_4/4_Confidence_0.000_Length_1343, vo_n2_Locus_19192_Transcript_2/2_Confidence_0.250_Length_3053,<br/> vo_n1_Locus_12743_Transcript_2/2_Confidence_0.000_Length_633, vo_n2_Locus_24861_Transcript_1/3_Confidence_0.714_Length_1018,<br/> tri_c_comp9226_c0_seq1, vo_c2_Locus_16114_Transcript_1/1_Confidence_0.000_Length_1890,<br/> vo_n2_Locus_4057_Transcript_1/1_Confidence_0.000_Length_1221, vo_n1_Locus_7235_Transcript_3/6_Confidence_0.625_Length_1162,<br/> vo_n3_Locus_14008_Transcript_1/1_Confidence_0.000_Length_2199, vo_n1_Locus_16218_Transcript_1/1_Confidence_0.000_Length_2119,<br/> vo_n2_Locus_7435_Transcript_1/1_Confidence_0.000_Length_1552, vo_c1_Locus_13556_Transcript_2/2_Confidence_0.000_Length_1297,<br/> tri_c_comp22527_c0_seq1, vo_n1_Locus_10504_Transcript_1/2_Confidence_0.750_Length_1211,<br/> vo_c2_Locus_9062_Transcript_1/11_Confidence_0.312_Length_4797</p> |
|--------------------------|----------|----|------------------------------------------------------------------------------------------------------------------------------------------------------------------------------------------------------------------------------------------------------------------------------------------------------------------------------------------------------------------------------------------------------------------------------|---------------------------------------------------------|---------------------------------------------------------------------------------------------------------------------------------------------------------------------------------------------------------------------------------------------------------------------------------------------------------------------------------------------------------------------------------------------------------------------------------------------------------------------------------------------------------------------------------------------------------------------------------------------------------------------------------------------------------------------------------------------------------------------------------------------------------------------------------------------------------------------------------------------------------------------------------------------------------------------------------------------------------------------------------------------------------------------------------------------------------------------------------------------------------------------------------------------------------------------------------------------------------------------------------------------------------------------------------------------------------------------------------------------------------------------------------------------------------------------------------------------------------------------------------------------------------------------------------------------------------------------------------------------------------------------------------------------------------------------------------------------------------------------------------------------------------------------------------------------------------------------------------------------------------------------------------------------------------------------------------------------------------------------------------------------------------------------------------------------------------------------------------------------------------------------------------------------------------------------------------------------------------------------------------------------------------------------------------------------------------------------------------------------------------------------------------------------------------------------------------------------------------------------------------------------------------------------------------------------------------------------------------------------------------------------------------------------------------------------------------------------------------------------------------------------------------------------------------------------------------------------------------------------------------------------------------------------------------------------------------------------------------------------------------------------------------------------------------------------------------------------------------------------------------------------------------------------------------------------------------------------------------------------------------------------------------------------------------------------------------------------------------------------|

|                           |          |    |                                                                                                                                                                                                                                                                                                                                                                                                                                                                                                                  |                                          |                                                                                                                                                                                                                                                                                                                                                                                                                                                                                                                                                                                                                                                                                                                                                                                                                                                                                                                                                                                                                                                                                                                                                                                                                                                                                                                                                                                                                                                                                                                                                                                                                                                                                                                                                                                                                                                                                                                                                                                                                                                                                                                                                                                                                                                                                                                                                                                                                                                                                                                                                                                                                                                                                                                                                                                                                                                                                                                                                                                                                              |
|---------------------------|----------|----|------------------------------------------------------------------------------------------------------------------------------------------------------------------------------------------------------------------------------------------------------------------------------------------------------------------------------------------------------------------------------------------------------------------------------------------------------------------------------------------------------------------|------------------------------------------|------------------------------------------------------------------------------------------------------------------------------------------------------------------------------------------------------------------------------------------------------------------------------------------------------------------------------------------------------------------------------------------------------------------------------------------------------------------------------------------------------------------------------------------------------------------------------------------------------------------------------------------------------------------------------------------------------------------------------------------------------------------------------------------------------------------------------------------------------------------------------------------------------------------------------------------------------------------------------------------------------------------------------------------------------------------------------------------------------------------------------------------------------------------------------------------------------------------------------------------------------------------------------------------------------------------------------------------------------------------------------------------------------------------------------------------------------------------------------------------------------------------------------------------------------------------------------------------------------------------------------------------------------------------------------------------------------------------------------------------------------------------------------------------------------------------------------------------------------------------------------------------------------------------------------------------------------------------------------------------------------------------------------------------------------------------------------------------------------------------------------------------------------------------------------------------------------------------------------------------------------------------------------------------------------------------------------------------------------------------------------------------------------------------------------------------------------------------------------------------------------------------------------------------------------------------------------------------------------------------------------------------------------------------------------------------------------------------------------------------------------------------------------------------------------------------------------------------------------------------------------------------------------------------------------------------------------------------------------------------------------------------------------|
| One carbon pool by folate | map00670 | 12 | <p>ec:6.3.3.2 - cyclo-ligase,<br/> ec:3.5.4.9 - cyclohydrolase,<br/> ec:2.1.1.45 - synthase,<br/> ec:2.1.1.13 - synthase,<br/> ec:1.5.1.3 - reductase,<br/> ec:1.5.1.5 - dehydrogenase (NADP+),<br/> ec:2.1.2.3 - formyltransferase,<br/> ec:2.1.2.2 - formyltransferase,<br/> ec:2.1.2.1 - hydroxymethyltransferase,<br/> ec:6.3.4.3 - ligase,<br/> ec:1.5.1.20 - reductase [NAD(P)H],<br/> ec:2.1.2.10 - S-aminomethyldihydrofoloylpr otein:(6S)-tetrahydrofolate aminomethyltransferase (ammonia-forming)</p> | 9, 2, 5, 4,<br>1, 2, 8, 1,<br>9, 2, 1, 9 | <p>tri_n_comp18448_c0_seq7, vo_c3_Locus_3582_Transcript_8/9_Confidence_0.071_Length_1176,<br/> vo_c2_Locus_1080_Transcript_8/21_Confidence_0.138_Length_1077, tri_n_comp18448_c0_seq1, tri_n_comp18448_c0_seq2,<br/> tri_n_comp18448_c0_seq3, tri_n_comp18448_c0_seq4, vo_n2_Locus_26338_Transcript_1/2_Confidence_0.333_Length_1245,<br/> tri_n_comp18448_c0_seq6, tri_n_comp31819_c0_seq1, vo_n2_Locus_10494_Transcript_3/4_Confidence_0.333_Length_2314,<br/> tri_c_comp11590_c0_seq1, vo_c3_Locus_15578_Transcript_2/4_Confidence_0.722_Length_967,<br/> vo_c1_Locus_6843_Transcript_1/2_Confidence_0.833_Length_813, vo_c2_Locus_1969_Transcript_1/2_Confidence_0.200_Length_1807,<br/> vo_c1_Locus_6843_Transcript_2/2_Confidence_0.167_Length_995, vo_n3_Locus_12898_Transcript_5/14_Confidence_0.429_Length_3637,<br/> vo_n2_Locus_4083_Transcript_7/15_Confidence_0.571_Length_4447, vo_c3_Locus_876_Transcript_5/9_Confidence_0.526_Length_3245,<br/> vo_n2_Locus_4083_Transcript_2/15_Confidence_0.619_Length_4830, vo_c2_Locus_1969_Transcript_1/2_Confidence_0.200_Length_1807,<br/> vo_n2_Locus_2550_Transcript_2/3_Confidence_0.636_Length_1302, tri_n_comp31819_c0_seq1,<br/> vo_c1_Locus_1055_Transcript_9/11_Confidence_0.357_Length_2035, vo_n1_Locus_561_Transcript_9/10_Confidence_0.462_Length_2182,<br/> vo_n2_Locus_3954_Transcript_2/8_Confidence_0.478_Length_2452, vo_c3_Locus_289_Transcript_1/7_Confidence_0.381_Length_2114,<br/> vo_n2_Locus_3954_Transcript_4/8_Confidence_0.435_Length_2452, vo_n1_Locus_561_Transcript_7/10_Confidence_0.385_Length_2182,<br/> vo_c1_Locus_1055_Transcript_7/11_Confidence_0.357_Length_2063, vo_n1_Locus_561_Transcript_1/10_Confidence_0.615_Length_2142,<br/> vo_n2_Locus_3094_Transcript_1/1_Confidence_0.000_Length_2179, vo_c2_Locus_1465_Transcript_1/1_Confidence_0.000_Length_2684,<br/> vo_n2_Locus_668_Transcript_12/17_Confidence_0.465_Length_3343, vo_n3_Locus_1281_Transcript_13/14_Confidence_0.467_Length_2089,<br/> vo_n2_Locus_668_Transcript_10/17_Confidence_0.419_Length_1865, vo_c3_Locus_6604_Transcript_15/15_Confidence_0.590_Length_1792,<br/> vo_n3_Locus_1281_Transcript_3/14_Confidence_0.533_Length_1904, vo_c3_Locus_6604_Transcript_12/15_Confidence_0.230_Length_1729,<br/> tri_n_comp22443_c0_seq1, vo_c2_Locus_2191_Transcript_14/17_Confidence_0.464_Length_1841, tri_n_comp31819_c0_seq1,<br/> vo_n2_Locus_10494_Transcript_3/4_Confidence_0.333_Length_2314, vo_c2_Locus_1465_Transcript_1/1_Confidence_0.000_Length_2684,<br/> tri_c_comp25586_c0_seq1, vo_c2_Locus_23277_Transcript_1/1_Confidence_0.000_Length_1058,<br/> vo_n1_Locus_803_Transcript_2/31_Confidence_0.118_Length_2529, vo_n1_Locus_27713_Transcript_1/1_Confidence_0.000_Length_1034,<br/> tri_n_comp13806_c0_seq3, tri_c_comp13451_c0_seq2, vo_n1_Locus_803_Transcript_9/31_Confidence_0.324_Length_2360,<br/> vo_n2_Locus_3952_Transcript_1/2_Confidence_0.750_Length_1244, vo_n2_Locus_514_Transcript_37/44_Confidence_0.155_Length_1950</p> |
|---------------------------|----------|----|------------------------------------------------------------------------------------------------------------------------------------------------------------------------------------------------------------------------------------------------------------------------------------------------------------------------------------------------------------------------------------------------------------------------------------------------------------------------------------------------------------------|------------------------------------------|------------------------------------------------------------------------------------------------------------------------------------------------------------------------------------------------------------------------------------------------------------------------------------------------------------------------------------------------------------------------------------------------------------------------------------------------------------------------------------------------------------------------------------------------------------------------------------------------------------------------------------------------------------------------------------------------------------------------------------------------------------------------------------------------------------------------------------------------------------------------------------------------------------------------------------------------------------------------------------------------------------------------------------------------------------------------------------------------------------------------------------------------------------------------------------------------------------------------------------------------------------------------------------------------------------------------------------------------------------------------------------------------------------------------------------------------------------------------------------------------------------------------------------------------------------------------------------------------------------------------------------------------------------------------------------------------------------------------------------------------------------------------------------------------------------------------------------------------------------------------------------------------------------------------------------------------------------------------------------------------------------------------------------------------------------------------------------------------------------------------------------------------------------------------------------------------------------------------------------------------------------------------------------------------------------------------------------------------------------------------------------------------------------------------------------------------------------------------------------------------------------------------------------------------------------------------------------------------------------------------------------------------------------------------------------------------------------------------------------------------------------------------------------------------------------------------------------------------------------------------------------------------------------------------------------------------------------------------------------------------------------------------------|

|                     |          |    |                                                                                                                                                                                                                                                                                                                                                                               |                                                |                                                                                                                                                                                                                                                                                                                                                                                                                                                                                                                                                                                                                                                                                                                                                                                                                                                                                                                                                                                                                                                                                                                                                                                                                                                                                                                                                                                                                                                                                                                                                                                                                                                                                                                                                                                                                                                                                                                                                                                                                                                                                                                                                                                                                                                                                                                                                                                                                                                                                                                                                                                                                                                                                                                                                                                                                                                                                                                                                                                                                                                                                                                                                                                                                                                                                                                                                                                                                                                                                                                                                                                                                                                                                                                                                                                                                                                                                                                                                                                                                                                                                                                                                                                                                                                                                                                                                                                                                                                                                                                                                                                                                                                                                                                                                                                                                                                                                                                                                                                                                                                                                                                                                                                                                                                                                                                                                                                                                                                                                   |
|---------------------|----------|----|-------------------------------------------------------------------------------------------------------------------------------------------------------------------------------------------------------------------------------------------------------------------------------------------------------------------------------------------------------------------------------|------------------------------------------------|-----------------------------------------------------------------------------------------------------------------------------------------------------------------------------------------------------------------------------------------------------------------------------------------------------------------------------------------------------------------------------------------------------------------------------------------------------------------------------------------------------------------------------------------------------------------------------------------------------------------------------------------------------------------------------------------------------------------------------------------------------------------------------------------------------------------------------------------------------------------------------------------------------------------------------------------------------------------------------------------------------------------------------------------------------------------------------------------------------------------------------------------------------------------------------------------------------------------------------------------------------------------------------------------------------------------------------------------------------------------------------------------------------------------------------------------------------------------------------------------------------------------------------------------------------------------------------------------------------------------------------------------------------------------------------------------------------------------------------------------------------------------------------------------------------------------------------------------------------------------------------------------------------------------------------------------------------------------------------------------------------------------------------------------------------------------------------------------------------------------------------------------------------------------------------------------------------------------------------------------------------------------------------------------------------------------------------------------------------------------------------------------------------------------------------------------------------------------------------------------------------------------------------------------------------------------------------------------------------------------------------------------------------------------------------------------------------------------------------------------------------------------------------------------------------------------------------------------------------------------------------------------------------------------------------------------------------------------------------------------------------------------------------------------------------------------------------------------------------------------------------------------------------------------------------------------------------------------------------------------------------------------------------------------------------------------------------------------------------------------------------------------------------------------------------------------------------------------------------------------------------------------------------------------------------------------------------------------------------------------------------------------------------------------------------------------------------------------------------------------------------------------------------------------------------------------------------------------------------------------------------------------------------------------------------------------------------------------------------------------------------------------------------------------------------------------------------------------------------------------------------------------------------------------------------------------------------------------------------------------------------------------------------------------------------------------------------------------------------------------------------------------------------------------------------------------------------------------------------------------------------------------------------------------------------------------------------------------------------------------------------------------------------------------------------------------------------------------------------------------------------------------------------------------------------------------------------------------------------------------------------------------------------------------------------------------------------------------------------------------------------------------------------------------------------------------------------------------------------------------------------------------------------------------------------------------------------------------------------------------------------------------------------------------------------------------------------------------------------------------------------------------------------------------------------------------------------------------------------------|
| Nitrogen metabolism | map00910 | 12 | <p>ec:6.3.1.2 - synthetase, ec:1.4.7.1 - synthase (ferredoxin), ec:1.13.12.16 - monooxygenase, ec:1.7.1.1 - reductase (NADH), ec:1.7.1.4 - reductase [NAD(P)H], ec:1.4.1.2 - dehydrogenase, ec:4.2.1.1 - anhydrase, ec:3.5.5.1 - acetonitrilase, ec:6.3.4.16 - synthase (ammonia), ec:1.7.99.4 - reductase, ec:1.4.1.14 - synthase (NADH), ec:1.4.1.13 - synthase (NADPH)</p> | <p>15, 12, 2, 21, 3, 1, 5, 1, 2, 7, 15, 10</p> | <p>vo_c1_Locus_1340_Transcript_12/17_Confidence_0.109_Length_2389, vo_c1_Locus_1340_Transcript_9/17_Confidence_0.172_Length_2429, tri_n_comp11684_c0_seq1, vo_c1_Locus_4136_Transcript_1/2_Confidence_0.967_Length_2259, vo_c2_Locus_6408_Transcript_2/14_Confidence_0.268_Length_1478, vo_n1_Locus_335_Transcript_2/3_Confidence_0.909_Length_2286, vo_c2_Locus_3512_Transcript_3/4_Confidence_0.500_Length_2501, vo_n2_Locus_4820_Transcript_2/3_Confidence_0.545_Length_2376, vo_n3_Locus_2644_Transcript_11/11_Confidence_0.323_Length_2390, vo_n2_Locus_515_Transcript_8/9_Confidence_0.471_Length_3194, vo_n2_Locus_515_Transcript_7/9_Confidence_0.176_Length_2355, vo_c2_Locus_3512_Transcript_2/4_Confidence_0.750_Length_2320, vo_c3_Locus_1501_Transcript_6/9_Confidence_0.203_Length_2420, vo_n2_Locus_5127_Transcript_1/3_Confidence_0.200_Length_1636, vo_n2_Locus_22912_Transcript_1/2_Confidence_0.333_Length_2481, vo_c2_Locus_4368_Transcript_2/25_Confidence_0.375_Length_6775, vo_c1_Locus_13166_Transcript_27/32_Confidence_0.394_Length_6627, vo_n2_Locus_3_Transcript_20516/24291_Confidence_0.000_Length_6564, vo_c3_Locus_3082_Transcript_7/7_Confidence_0.167_Length_5439, vo_n1_Locus_991_Transcript_1/21_Confidence_0.113_Length_1473, tri_c_comp19198_c0_seq1, vo_c1_Locus_13166_Transcript_28/32_Confidence_0.409_Length_6630, vo_n1_Locus_7772_Transcript_1/1_Confidence_0.000_Length_6986, tri_c_comp19198_c0_seq4, tri_c_comp19198_c0_seq3, vo_n3_Locus_4402_Transcript_3/18_Confidence_0.269_Length_6798, vo_c3_Locus_3082_Transcript_5/7_Confidence_0.333_Length_2051, vo_c1_Locus_4368_Transcript_2/3_Confidence_0.333_Length_1374, vo_n2_Locus_5728_Transcript_1/2_Confidence_0.333_Length_1242, vo_n3_Locus_5844_Transcript_3/4_Confidence_0.091_Length_2683, vo_n2_Locus_9904_Transcript_14/17_Confidence_0.179_Length_436, vo_n3_Locus_1465_Transcript_5/6_Confidence_0.308_Length_662, vo_c1_Locus_4987_Transcript_9/13_Confidence_0.192_Length_474, vo_n1_Locus_3296_Transcript_15/19_Confidence_0.267_Length_1918, vo_c2_Locus_1186_Transcript_52/68_Confidence_0.072_Length_1585, vo_c3_Locus_1280_Transcript_27/33_Confidence_0.200_Length_480, vo_n1_Locus_3296_Transcript_18/19_Confidence_0.200_Length_528, tri_c_comp15887_c0_seq2, vo_n3_Locus_1465_Transcript_4/6_Confidence_0.692_Length_819, vo_c3_Locus_481_Transcript_40/75_Confidence_0.052_Length_1602, tri_n_comp21114_c0_seq1, vo_c2_Locus_1414_Transcript_6/9_Confidence_0.118_Length_478, tri_n_comp24956_c0_seq1, vo_n2_Locus_9904_Transcript_11/17_Confidence_0.205_Length_579, vo_c3_Locus_1280_Transcript_10/33_Confidence_0.273_Length_2453, vo_n2_Locus_9450_Transcript_1/2_Confidence_1.000_Length_2867, vo_n2_Locus_9904_Transcript_16/17_Confidence_0.231_Length_575, vo_c3_Locus_1280_Transcript_30/33_Confidence_0.109_Length_1151, vo_n1_Locus_3296_Transcript_8/19_Confidence_0.267_Length_743, vo_n2_Locus_9904_Transcript_8/17_Confidence_0.462_Length_876, vo_n2_Locus_128_Transcript_8/33_Confidence_0.085_Length_4154, vo_c3_Locus_2901_Transcript_35/41_Confidence_0.153_Length_4192, tri_c_comp58470_c0_seq1, tri_c_comp28026_c0_seq1, tri_c_comp25113_c0_seq1, vo_n3_Locus_15566_Transcript_4/4_Confidence_0.143_Length_781, vo_n2_Locus_9558_Transcript_1/1_Confidence_0.000_Length_2494, vo_n3_Locus_10160_Transcript_1/2_Confidence_0.958_Length_2574, tri_n_comp53048_c0_seq1, vo_c2_Locus_31357_Transcript_6/7_Confidence_0.700_Length_1464, tri_c_comp33901_c0_seq1, vo_n2_Locus_5805_Transcript_1/2_Confidence_0.333_Length_5227, vo_c2_Locus_13354_Transcript_6/9_Confidence_0.231_Length_2604, vo_c1_Locus_5503_Transcript_5/9_Confidence_0.400_Length_1997, tri_c_comp6632_c0_seq1, vo_c1_Locus_4987_Transcript_13/13_Confidence_0.115_Length_625, vo_c3_Locus_8831_Transcript_2/3_Confidence_0.333_Length_1264, vo_n1_Locus_5428_Transcript_1/1_Confidence_0.000_Length_885, vo_c3_Locus_1280_Transcript_24/33_Confidence_0.127_Length_2411, vo_c1_Locus_13166_Transcript_27/32_Confidence_0.394_Length_6627, vo_c3_Locus_3082_Transcript_7/7_Confidence_0.167_Length_5439, vo_n1_Locus_991_Transcript_1/21_Confidence_0.113_Length_1473, tri_c_comp19198_c0_seq1, vo_n3_Locus_4402_Transcript_3/18_Confidence_0.269_Length_6798, vo_c2_Locus_4368_Transcript_2/25_Confidence_0.375_Length_6775, vo_n2_Locus_3_Transcript_20516/24291_Confidence_0.000_Length_6564, vo_n3_Locus_4402_Transcript_4/18_Confidence_0.077_Length_491, vo_c1_Locus_13166_Transcript_10/32_Confidence_0.076_Length_628, vo_c1_Locus_13166_Transcript_28/32_Confidence_0.409_Length_6630, vo_n1_Locus_7772_Transcript_1/1_Confidence_0.000_Length_6986, tri_c_comp19198_c0_seq4, tri_c_comp19198_c0_seq3, vo_c3_Locus_3082_Transcript_5/7_Confidence_0.333_Length_2051, vo_c1_Locus_1115_Transcript_3/3_Confidence_0.000_Length_916, vo_c2_Locus_4368_Transcript_2/25_Confidence_0.375_Length_6775, vo_c1_Locus_13166_Transcript_27/32_Confidence_0.394_Length_6627, vo_n2_Locus_3_Transcript_20516/24291_Confidence_0.000_Length_6564, vo_c3_Locus_3082_Transcript_7/7_Confidence_0.167_Length_5439, vo_n1_Locus_991_Transcript_1/21_Confidence_0.113_Length_1473, tri_c_comp19198_c0_seq1, vo_c1_Locus_13166_Transcript_28/32_Confidence_0.409_Length_6630, vo_n1_Locus_7772_Transcript_1/1_Confidence_0.000_Length_6986, vo_n3_Locus_4402_Transcript_3/18_Confidence_0.269_Length_6798, vo_c3_Locus_3082_Transcript_5/7_Confidence_0.333_Length_2051</p> |
|---------------------|----------|----|-------------------------------------------------------------------------------------------------------------------------------------------------------------------------------------------------------------------------------------------------------------------------------------------------------------------------------------------------------------------------------|------------------------------------------------|-----------------------------------------------------------------------------------------------------------------------------------------------------------------------------------------------------------------------------------------------------------------------------------------------------------------------------------------------------------------------------------------------------------------------------------------------------------------------------------------------------------------------------------------------------------------------------------------------------------------------------------------------------------------------------------------------------------------------------------------------------------------------------------------------------------------------------------------------------------------------------------------------------------------------------------------------------------------------------------------------------------------------------------------------------------------------------------------------------------------------------------------------------------------------------------------------------------------------------------------------------------------------------------------------------------------------------------------------------------------------------------------------------------------------------------------------------------------------------------------------------------------------------------------------------------------------------------------------------------------------------------------------------------------------------------------------------------------------------------------------------------------------------------------------------------------------------------------------------------------------------------------------------------------------------------------------------------------------------------------------------------------------------------------------------------------------------------------------------------------------------------------------------------------------------------------------------------------------------------------------------------------------------------------------------------------------------------------------------------------------------------------------------------------------------------------------------------------------------------------------------------------------------------------------------------------------------------------------------------------------------------------------------------------------------------------------------------------------------------------------------------------------------------------------------------------------------------------------------------------------------------------------------------------------------------------------------------------------------------------------------------------------------------------------------------------------------------------------------------------------------------------------------------------------------------------------------------------------------------------------------------------------------------------------------------------------------------------------------------------------------------------------------------------------------------------------------------------------------------------------------------------------------------------------------------------------------------------------------------------------------------------------------------------------------------------------------------------------------------------------------------------------------------------------------------------------------------------------------------------------------------------------------------------------------------------------------------------------------------------------------------------------------------------------------------------------------------------------------------------------------------------------------------------------------------------------------------------------------------------------------------------------------------------------------------------------------------------------------------------------------------------------------------------------------------------------------------------------------------------------------------------------------------------------------------------------------------------------------------------------------------------------------------------------------------------------------------------------------------------------------------------------------------------------------------------------------------------------------------------------------------------------------------------------------------------------------------------------------------------------------------------------------------------------------------------------------------------------------------------------------------------------------------------------------------------------------------------------------------------------------------------------------------------------------------------------------------------------------------------------------------------------------------------------------------------------------------------------------------|

|                       |          |    |                                                                                                                                                                                                                                                                                                                                                                                 |                                  |                                                                                                                                                                                                                                                                                                                                                                                                                                                                                                                                                                                                                                                                                                                                                                                                                                                                                                                                                                                                                                                                                                                                                                                                                                                                                                                                                                                                                                                                                                                                                                                                                                                                                                                                                                                                                                                                                                                                                                                                                                                                                                                                                                                                                                                                                                                                                                                                                                                                                                                                            |
|-----------------------|----------|----|---------------------------------------------------------------------------------------------------------------------------------------------------------------------------------------------------------------------------------------------------------------------------------------------------------------------------------------------------------------------------------|----------------------------------|--------------------------------------------------------------------------------------------------------------------------------------------------------------------------------------------------------------------------------------------------------------------------------------------------------------------------------------------------------------------------------------------------------------------------------------------------------------------------------------------------------------------------------------------------------------------------------------------------------------------------------------------------------------------------------------------------------------------------------------------------------------------------------------------------------------------------------------------------------------------------------------------------------------------------------------------------------------------------------------------------------------------------------------------------------------------------------------------------------------------------------------------------------------------------------------------------------------------------------------------------------------------------------------------------------------------------------------------------------------------------------------------------------------------------------------------------------------------------------------------------------------------------------------------------------------------------------------------------------------------------------------------------------------------------------------------------------------------------------------------------------------------------------------------------------------------------------------------------------------------------------------------------------------------------------------------------------------------------------------------------------------------------------------------------------------------------------------------------------------------------------------------------------------------------------------------------------------------------------------------------------------------------------------------------------------------------------------------------------------------------------------------------------------------------------------------------------------------------------------------------------------------------------------------|
| Tryptophan metabolism | map00380 | 11 | ec:1.13.11.6 - 3,4-dioxygenase, ec:1.2.1.3 - dehydrogenase (NAD+), ec:2.3.1.9 - C-acetyltransferase, ec:1.14.16.4 - 5-monoxygenase, ec:3.5.1.4 - acylamidase, ec:3.5.1.9 - kynurenine formamidase, ec:3.7.1.3 - ec:3.7.1.3 kynureninase, ec:3.5.5.1 - acetoneitrilase, ec:4.2.1.17 - hydratase, ec:1.1.1.35 - dehydrogenase, ec:1.2.4.2 - dehydrogenase (succinyl-transferring) | 1, 5, 2, 1, 3, 2, 1, 1, 7, 16, 2 | vo_n2_Locus_11170_Transcript_1/1_Confidence_0.000_Length_1117, tri_c_comp55340_c0_seq1, vo_n1_Locus_19864_Transcript_2/2_Confidence_0.000_Length_2707, vo_c3_Locus_21741_Transcript_5/9_Confidence_0.583_Length_1757, vo_n3_Locus_25600_Transcript_5/6_Confidence_0.375_Length_1777, tri_n_comp58061_c0_seq1, vo_c1_Locus_2657_Transcript_1/1_Confidence_0.000_Length_1513, vo_n2_Locus_23058_Transcript_1/1_Confidence_0.000_Length_1342, vo_c2_Locus_16025_Transcript_2/3_Confidence_0.400_Length_2217, vo_c3_Locus_1581_Transcript_3/3_Confidence_0.000_Length_1736, vo_c1_Locus_1298_Transcript_3/6_Confidence_0.625_Length_1775, vo_n2_Locus_157_Transcript_2/4_Confidence_0.286_Length_2059, vo_n2_Locus_10311_Transcript_5/6_Confidence_0.357_Length_778, vo_n2_Locus_10311_Transcript_2/6_Confidence_0.500_Length_1843, vo_c3_Locus_23248_Transcript_1/1_Confidence_0.000_Length_1653, vo_c2_Locus_31357_Transcript_6/7_Confidence_0.700_Length_1464, vo_c2_Locus_2261_Transcript_1/2_Confidence_1.000_Length_2564, vo_c3_Locus_5948_Transcript_1/1_Confidence_0.000_Length_1027, vo_n2_Locus_16945_Transcript_1/3_Confidence_0.500_Length_1084, vo_c3_Locus_9925_Transcript_8/11_Confidence_0.263_Length_3550, vo_n1_Locus_11137_Transcript_5/5_Confidence_0.143_Length_2829, vo_n2_Locus_16945_Transcript_3/3_Confidence_0.000_Length_746, vo_n2_Locus_30747_Transcript_1/1_Confidence_0.000_Length_951, vo_c2_Locus_2261_Transcript_1/2_Confidence_1.000_Length_2564, vo_n1_Locus_9414_Transcript_8/13_Confidence_0.167_Length_606, vo_c1_Locus_40339_Transcript_1/1_Confidence_0.000_Length_1318, vo_c3_Locus_2031_Transcript_8/8_Confidence_0.111_Length_1389, vo_n1_Locus_11137_Transcript_5/5_Confidence_0.143_Length_2829, vo_c1_Locus_4675_Transcript_3/3_Confidence_0.200_Length_1348, vo_n2_Locus_30747_Transcript_1/1_Confidence_0.000_Length_951, vo_n2_Locus_636_Transcript_13/16_Confidence_0.222_Length_768, vo_c1_Locus_2815_Transcript_3/4_Confidence_0.200_Length_2244, vo_c3_Locus_9925_Transcript_8/11_Confidence_0.263_Length_3550, tri_n_comp42565_c0_seq1, vo_c2_Locus_189_Transcript_29/60_Confidence_0.015_Length_692, vo_n2_Locus_636_Transcript_16/16_Confidence_0.139_Length_616, vo_n2_Locus_636_Transcript_14/16_Confidence_0.222_Length_622, vo_n2_Locus_636_Transcript_5/16_Confidence_0.194_Length_591, vo_n2_Locus_636_Transcript_3/16_Confidence_0.306_Length_685, vo_n2_Locus_3831_Transcript_3/5_Confidence_0.286_Length_3559, vo_c2_Locus_13441_Transcript_1/2_Confidence_0.333_Length_3397 |
|-----------------------|----------|----|---------------------------------------------------------------------------------------------------------------------------------------------------------------------------------------------------------------------------------------------------------------------------------------------------------------------------------------------------------------------------------|----------------------------------|--------------------------------------------------------------------------------------------------------------------------------------------------------------------------------------------------------------------------------------------------------------------------------------------------------------------------------------------------------------------------------------------------------------------------------------------------------------------------------------------------------------------------------------------------------------------------------------------------------------------------------------------------------------------------------------------------------------------------------------------------------------------------------------------------------------------------------------------------------------------------------------------------------------------------------------------------------------------------------------------------------------------------------------------------------------------------------------------------------------------------------------------------------------------------------------------------------------------------------------------------------------------------------------------------------------------------------------------------------------------------------------------------------------------------------------------------------------------------------------------------------------------------------------------------------------------------------------------------------------------------------------------------------------------------------------------------------------------------------------------------------------------------------------------------------------------------------------------------------------------------------------------------------------------------------------------------------------------------------------------------------------------------------------------------------------------------------------------------------------------------------------------------------------------------------------------------------------------------------------------------------------------------------------------------------------------------------------------------------------------------------------------------------------------------------------------------------------------------------------------------------------------------------------------|

|                         |          |    |                                                                                                                                                                                                                                                                                                                                                                                         |                                 |                                                                                                                                                                                                                                                                                                                                                                                                                                                                                                                                                                                                                                                                                                                                                                                                                                                                                                                                                                                                                                                                                                                                                                                                                                                                                                                                                                                                                                                              |
|-------------------------|----------|----|-----------------------------------------------------------------------------------------------------------------------------------------------------------------------------------------------------------------------------------------------------------------------------------------------------------------------------------------------------------------------------------------|---------------------------------|--------------------------------------------------------------------------------------------------------------------------------------------------------------------------------------------------------------------------------------------------------------------------------------------------------------------------------------------------------------------------------------------------------------------------------------------------------------------------------------------------------------------------------------------------------------------------------------------------------------------------------------------------------------------------------------------------------------------------------------------------------------------------------------------------------------------------------------------------------------------------------------------------------------------------------------------------------------------------------------------------------------------------------------------------------------------------------------------------------------------------------------------------------------------------------------------------------------------------------------------------------------------------------------------------------------------------------------------------------------------------------------------------------------------------------------------------------------|
| beta-Alanine metabolism | map00410 | 11 | <p>ec:2.6.1.18 - transaminase,<br/> ec:2.6.1.19 - transaminase,<br/> ec:2.5.1.16 - synthase,<br/> ec:2.5.1.22 - synthase,<br/> ec:1.2.1.18 - dehydrogenase (acetylating),<br/> ec:1.2.1.5 - dehydrogenase [NAD(P)+],<br/> ec:1.2.1.3 - dehydrogenase (NAD+),<br/> ec:4.1.1.9 - decarboxylase,<br/> ec:3.1.2.4 - hydrolase,<br/> ec:4.2.1.17 - hydratase,<br/> ec:1.4.3.21 - oxidase</p> | 1, 2, 1, 2, 3, 2, 5, 1, 1, 7, 1 | <p>vo_c1_Locus_7220_Transcript_2/3_Confidence_0.400_Length_2898, vo_c3_Locus_29526_Transcript_7/10_Confidence_0.268_Length_874, vo_c2_Locus_844_Transcript_5/40_Confidence_0.162_Length_2081, vo_c2_Locus_25147_Transcript_1/2_Confidence_0.333_Length_1097, vo_c2_Locus_25147_Transcript_1/2_Confidence_0.333_Length_1097, tri_c_comp23701_c0_seq1, vo_c3_Locus_1581_Transcript_3/3_Confidence_0.000_Length_1736, vo_c1_Locus_1298_Transcript_3/6_Confidence_0.625_Length_1775, vo_n2_Locus_157_Transcript_2/4_Confidence_0.286_Length_2059, tri_c_comp55340_c0_seq1, tri_n_comp58061_c0_seq1, tri_c_comp55340_c0_seq1, vo_n1_Locus_19864_Transcript_2/2_Confidence_0.000_Length_2707, vo_c3_Locus_21741_Transcript_5/9_Confidence_0.583_Length_1757, vo_n3_Locus_25600_Transcript_5/6_Confidence_0.375_Length_1777, tri_n_comp58061_c0_seq1, vo_c2_Locus_22623_Transcript_1/1_Confidence_0.000_Length_1765, vo_c3_Locus_6234_Transcript_1/1_Confidence_0.000_Length_1326, vo_c2_Locus_2261_Transcript_1/2_Confidence_1.000_Length_2564, vo_c3_Locus_5948_Transcript_1/1_Confidence_0.000_Length_1027, vo_n2_Locus_16945_Transcript_1/3_Confidence_0.500_Length_1084, vo_c3_Locus_9925_Transcript_8/11_Confidence_0.263_Length_3550, vo_n1_Locus_11137_Transcript_5/5_Confidence_0.143_Length_2829, vo_n2_Locus_16945_Transcript_3/3_Confidence_0.000_Length_746, vo_n2_Locus_30747_Transcript_1/1_Confidence_0.000_Length_951, tri_n_comp48625_c0_seq1</p> |
|-------------------------|----------|----|-----------------------------------------------------------------------------------------------------------------------------------------------------------------------------------------------------------------------------------------------------------------------------------------------------------------------------------------------------------------------------------------|---------------------------------|--------------------------------------------------------------------------------------------------------------------------------------------------------------------------------------------------------------------------------------------------------------------------------------------------------------------------------------------------------------------------------------------------------------------------------------------------------------------------------------------------------------------------------------------------------------------------------------------------------------------------------------------------------------------------------------------------------------------------------------------------------------------------------------------------------------------------------------------------------------------------------------------------------------------------------------------------------------------------------------------------------------------------------------------------------------------------------------------------------------------------------------------------------------------------------------------------------------------------------------------------------------------------------------------------------------------------------------------------------------------------------------------------------------------------------------------------------------|



|                        |          |    |                                                                                                                                                                                                                                                                                                                                                                             |                                   |                                                                                                                                                                                                                                                                                                                                                                                                                                                                                                                                                                                                                                                                                                                                                                                                                                                                                                                                                                                                                                                                                                                                                                                                                                                                                                                                                                                                                                                                                                                                                                                                                                                                                                                                                                                                                                                                                                                                                                                                                                                                                                                                                                                                                                                                                                                                                                                                                                                                                                                                                                                                                                                                                                                                                                                                                                                                                                                                                                                                                                                                                                                                                                                                                                                                                                                                                                   |
|------------------------|----------|----|-----------------------------------------------------------------------------------------------------------------------------------------------------------------------------------------------------------------------------------------------------------------------------------------------------------------------------------------------------------------------------|-----------------------------------|-------------------------------------------------------------------------------------------------------------------------------------------------------------------------------------------------------------------------------------------------------------------------------------------------------------------------------------------------------------------------------------------------------------------------------------------------------------------------------------------------------------------------------------------------------------------------------------------------------------------------------------------------------------------------------------------------------------------------------------------------------------------------------------------------------------------------------------------------------------------------------------------------------------------------------------------------------------------------------------------------------------------------------------------------------------------------------------------------------------------------------------------------------------------------------------------------------------------------------------------------------------------------------------------------------------------------------------------------------------------------------------------------------------------------------------------------------------------------------------------------------------------------------------------------------------------------------------------------------------------------------------------------------------------------------------------------------------------------------------------------------------------------------------------------------------------------------------------------------------------------------------------------------------------------------------------------------------------------------------------------------------------------------------------------------------------------------------------------------------------------------------------------------------------------------------------------------------------------------------------------------------------------------------------------------------------------------------------------------------------------------------------------------------------------------------------------------------------------------------------------------------------------------------------------------------------------------------------------------------------------------------------------------------------------------------------------------------------------------------------------------------------------------------------------------------------------------------------------------------------------------------------------------------------------------------------------------------------------------------------------------------------------------------------------------------------------------------------------------------------------------------------------------------------------------------------------------------------------------------------------------------------------------------------------------------------------------------------------------------------|
| Fatty acid degradation | map00071 | 11 | <p>ec:5.1.2.3 - epimerase,<br/> ec:6.2.1.3 - ligase,<br/> ec:4.2.1.74 - hydratase,<br/> ec:5.3.3.8 - isomerase,<br/> ec:1.2.1.3 - dehydrogenase (NAD+),<br/> ec:2.3.1.9 - C-acetyltransferase,<br/> ec:1.3.3.6 - oxidase,<br/> ec:1.3.8.1 - acyl-CoA dehydrogenase,<br/> ec:1.14.15.3 - 1-monooxygenase,<br/> ec:4.2.1.17 - hydratase,<br/> ec:1.1.1.35 - dehydrogenase</p> | 2, 6, 11, 2, 5, 2, 2, 2, 1, 7, 16 | <p>vo_n1_Locus_11137_Transcript_5/5_Confidence_0.143_Length_2829, vo_c3_Locus_9925_Transcript_8/11_Confidence_0.263_Length_3550, vo_c2_Locus_5191_Transcript_21/21_Confidence_0.029_Length_509, vo_c3_Locus_1178_Transcript_1/1_Confidence_0.667_Length_2367, vo_c2_Locus_3586_Transcript_1/4_Confidence_0.667_Length_2244, vo_c2_Locus_5191_Transcript_16/21_Confidence_0.457_Length_3699, tri_c_comp29321_c0_seq1, tri_c_comp48942_c0_seq1, vo_c2_Locus_2261_Transcript_1/2_Confidence_1.000_Length_2564, vo_n1_Locus_9414_Transcript_8/13_Confidence_0.167_Length_606, vo_c3_Locus_9925_Transcript_8/11_Confidence_0.263_Length_3550, vo_c2_Locus_189_Transcript_29/60_Confidence_0.015_Length_692, vo_c3_Locus_2031_Transcript_8/8_Confidence_0.111_Length_1389, vo_n2_Locus_636_Transcript_16/16_Confidence_0.139_Length_616, vo_n2_Locus_636_Transcript_14/16_Confidence_0.222_Length_622, vo_n2_Locus_636_Transcript_5/16_Confidence_0.194_Length_591, vo_n2_Locus_636_Transcript_3/16_Confidence_0.306_Length_685, vo_n2_Locus_30747_Transcript_1/1_Confidence_0.000_Length_951, vo_n2_Locus_636_Transcript_13/16_Confidence_0.222_Length_768, vo_n1_Locus_11137_Transcript_5/5_Confidence_0.143_Length_2829, vo_c3_Locus_9925_Transcript_8/11_Confidence_0.263_Length_3550, tri_c_comp55340_c0_seq1, vo_n1_Locus_19864_Transcript_2/2_Confidence_0.000_Length_2707, vo_c3_Locus_21741_Transcript_5/9_Confidence_0.583_Length_1757, vo_n3_Locus_25600_Transcript_5/6_Confidence_0.375_Length_1777, tri_n_comp58061_c0_seq1, vo_c1_Locus_2657_Transcript_1/1_Confidence_0.000_Length_1513, vo_n2_Locus_23058_Transcript_1/1_Confidence_0.000_Length_1342, tri_n_comp36670_c0_seq1, vo_n1_Locus_23625_Transcript_1/1_Confidence_0.000_Length_2286, tri_c_comp7217_c0_seq2, vo_c3_Locus_18248_Transcript_1/2_Confidence_0.667_Length_1596, vo_n2_Locus_2042_Transcript_5/7_Confidence_0.231_Length_2650, vo_c2_Locus_2261_Transcript_1/2_Confidence_1.000_Length_2564, vo_c3_Locus_5948_Transcript_1/1_Confidence_0.000_Length_1027, vo_n2_Locus_16945_Transcript_1/3_Confidence_0.500_Length_1084, vo_c3_Locus_9925_Transcript_8/11_Confidence_0.263_Length_3550, vo_n1_Locus_11137_Transcript_5/5_Confidence_0.143_Length_2829, vo_n2_Locus_16945_Transcript_3/3_Confidence_0.000_Length_746, vo_n2_Locus_30747_Transcript_1/1_Confidence_0.000_Length_951, vo_c2_Locus_2261_Transcript_1/2_Confidence_1.000_Length_2564, vo_n1_Locus_9414_Transcript_8/13_Confidence_0.167_Length_606, vo_c1_Locus_40339_Transcript_1/1_Confidence_0.000_Length_1318, vo_c3_Locus_2031_Transcript_8/8_Confidence_0.111_Length_1389, vo_n1_Locus_11137_Transcript_5/5_Confidence_0.143_Length_2829, vo_c1_Locus_4675_Transcript_3/3_Confidence_0.200_Length_1348, vo_n2_Locus_30747_Transcript_1/1_Confidence_0.000_Length_951, vo_n2_Locus_636_Transcript_13/16_Confidence_0.222_Length_768, vo_c1_Locus_2815_Transcript_3/4_Confidence_0.200_Length_2244, vo_c3_Locus_9925_Transcript_8/11_Confidence_0.263_Length_3550, tri_n_comp42565_c0_seq1, vo_c2_Locus_189_Transcript_29/60_Confidence_0.015_Length_692, vo_n2_Locus_636_Transcript_16/16_Confidence_0.139_Length_616, vo_n2_Locus_636_Transcript_14/16_Confidence_0.222_Length_622, vo_n2_Locus_636_Transcript_5/16_Confidence_0.194_Length_591, vo_n2_Locus_636_Transcript_3/16_Confidence_0.306_Length_685</p> |
|------------------------|----------|----|-----------------------------------------------------------------------------------------------------------------------------------------------------------------------------------------------------------------------------------------------------------------------------------------------------------------------------------------------------------------------------|-----------------------------------|-------------------------------------------------------------------------------------------------------------------------------------------------------------------------------------------------------------------------------------------------------------------------------------------------------------------------------------------------------------------------------------------------------------------------------------------------------------------------------------------------------------------------------------------------------------------------------------------------------------------------------------------------------------------------------------------------------------------------------------------------------------------------------------------------------------------------------------------------------------------------------------------------------------------------------------------------------------------------------------------------------------------------------------------------------------------------------------------------------------------------------------------------------------------------------------------------------------------------------------------------------------------------------------------------------------------------------------------------------------------------------------------------------------------------------------------------------------------------------------------------------------------------------------------------------------------------------------------------------------------------------------------------------------------------------------------------------------------------------------------------------------------------------------------------------------------------------------------------------------------------------------------------------------------------------------------------------------------------------------------------------------------------------------------------------------------------------------------------------------------------------------------------------------------------------------------------------------------------------------------------------------------------------------------------------------------------------------------------------------------------------------------------------------------------------------------------------------------------------------------------------------------------------------------------------------------------------------------------------------------------------------------------------------------------------------------------------------------------------------------------------------------------------------------------------------------------------------------------------------------------------------------------------------------------------------------------------------------------------------------------------------------------------------------------------------------------------------------------------------------------------------------------------------------------------------------------------------------------------------------------------------------------------------------------------------------------------------------------------------------|

|                           |          |    |                                                                                                                                                                                                                                                                                                                                                                                                                                                                                              |                                          |                                                                                                                                                                                                                                                                                                                                                                                                                                                                                                                                                                                                                                                                                                                                                                                                                                                                                                                                                                                                                                                                                                                                                                                                                                                                                                                                                                                                                                                                                                                                                                                                                                                                                                                                                                                                                                                                                                                                                                                                                                                                                                                                                                                                                                                                                                                                                                                                                                                                                                                                                                                                                                                                                                                                                                                                                                                                                                                                                                                                                                                                                                                                                                                                                                                                                                                                                                                                                                                                                                                                                                                                                                                                                                                                                                                                                                                                                                                                                                                                                                                                                                                                                                                                                                                                                                                                                                                                                                                                                                                                                                                                                                                                                                                                                                                                                                                                                                                                                                                                                                                                                                                                                                                                                                                                                                                                                                                                                                                                                                                                                                                                                                                                                                                                                                                                                                                                                                                                                                                                                                                                                                                                                                                                                                                                                                                                                                                                                                                                                                                                                                                                                                                                                                                                                                                                                                                                                                                                                                           |
|---------------------------|----------|----|----------------------------------------------------------------------------------------------------------------------------------------------------------------------------------------------------------------------------------------------------------------------------------------------------------------------------------------------------------------------------------------------------------------------------------------------------------------------------------------------|------------------------------------------|---------------------------------------------------------------------------------------------------------------------------------------------------------------------------------------------------------------------------------------------------------------------------------------------------------------------------------------------------------------------------------------------------------------------------------------------------------------------------------------------------------------------------------------------------------------------------------------------------------------------------------------------------------------------------------------------------------------------------------------------------------------------------------------------------------------------------------------------------------------------------------------------------------------------------------------------------------------------------------------------------------------------------------------------------------------------------------------------------------------------------------------------------------------------------------------------------------------------------------------------------------------------------------------------------------------------------------------------------------------------------------------------------------------------------------------------------------------------------------------------------------------------------------------------------------------------------------------------------------------------------------------------------------------------------------------------------------------------------------------------------------------------------------------------------------------------------------------------------------------------------------------------------------------------------------------------------------------------------------------------------------------------------------------------------------------------------------------------------------------------------------------------------------------------------------------------------------------------------------------------------------------------------------------------------------------------------------------------------------------------------------------------------------------------------------------------------------------------------------------------------------------------------------------------------------------------------------------------------------------------------------------------------------------------------------------------------------------------------------------------------------------------------------------------------------------------------------------------------------------------------------------------------------------------------------------------------------------------------------------------------------------------------------------------------------------------------------------------------------------------------------------------------------------------------------------------------------------------------------------------------------------------------------------------------------------------------------------------------------------------------------------------------------------------------------------------------------------------------------------------------------------------------------------------------------------------------------------------------------------------------------------------------------------------------------------------------------------------------------------------------------------------------------------------------------------------------------------------------------------------------------------------------------------------------------------------------------------------------------------------------------------------------------------------------------------------------------------------------------------------------------------------------------------------------------------------------------------------------------------------------------------------------------------------------------------------------------------------------------------------------------------------------------------------------------------------------------------------------------------------------------------------------------------------------------------------------------------------------------------------------------------------------------------------------------------------------------------------------------------------------------------------------------------------------------------------------------------------------------------------------------------------------------------------------------------------------------------------------------------------------------------------------------------------------------------------------------------------------------------------------------------------------------------------------------------------------------------------------------------------------------------------------------------------------------------------------------------------------------------------------------------------------------------------------------------------------------------------------------------------------------------------------------------------------------------------------------------------------------------------------------------------------------------------------------------------------------------------------------------------------------------------------------------------------------------------------------------------------------------------------------------------------------------------------------------------------------------------------------------------------------------------------------------------------------------------------------------------------------------------------------------------------------------------------------------------------------------------------------------------------------------------------------------------------------------------------------------------------------------------------------------------------------------------------------------------------------------------------------------------------------------------------------------------------------------------------------------------------------------------------------------------------------------------------------------------------------------------------------------------------------------------------------------------------------------------------------------------------------------------------------------------------------------------------------------------------------------------------|
| Lysine<br>degradati<br>on | map00310 | 11 | ec:2.6.1.48 - transaminase,<br>ec:2.1.1.43 - N-<br>methyltransferase,<br>ec:1.2.1.3 - dehydrogenase<br>(NAD+), ec:2.3.1.9 - C-<br>acetyltransferase, ec:1.5.1.8<br>- dehydrogenase (NADP+, L-<br>lysine-forming), ec:1.5.1.9 -<br>dehydrogenase (NAD+, L-<br>glutamate-forming),<br>ec:2.3.1.61 -<br>succinyltransferase,<br>ec:2.3.1.32 - N-<br>acetyltransferase,<br>ec:4.2.1.17 - hydratase,<br>ec:1.1.1.35 -<br>dehydrogenase, ec:1.2.4.2 -<br>dehydrogenase (succinyl-<br>transferring) | 3, 77, 5, 2,<br>6, 6, 3, 21,<br>7, 16, 2 | vo_c3_Locus_29526_Transcript_7/10_Confidence_0.268_Length_874, vo_c2_Locus_844_Transcript_5/40_Confidence_0.162_Length_2081,<br>vo_c2_Locus_844_Transcript_6/40_Confidence_0.010_Length_1778, vo_n3_Locus_18095_Transcript_1/2_Confidence_0.333_Length_2906,<br>vo_n2_Locus_470_Transcript_6/22_Confidence_0.514_Length_1171, tri_c_comp17599_c0_seq1,<br>vo_n3_Locus_270_Transcript_17/29_Confidence_0.365_Length_3911, tri_c_comp17599_c0_seq3, tri_n_comp11833_c0_seq2,<br>vo_c2_Locus_1219_Transcript_20/32_Confidence_0.384_Length_1442, vo_n3_Locus_3645_Transcript_1/4_Confidence_0.667_Length_2197,<br>vo_c3_Locus_24936_Transcript_7/10_Confidence_0.400_Length_1560, vo_n1_Locus_10100_Transcript_3/3_Confidence_0.200_Length_3547,<br>vo_c3_Locus_9140_Transcript_1/1_Confidence_0.000_Length_1391, vo_c1_Locus_5654_Transcript_1/3_Confidence_0.200_Length_1034,<br>vo_n2_Locus_8440_Transcript_2/5_Confidence_0.375_Length_590, vo_n3_Locus_270_Transcript_18/29_Confidence_0.333_Length_1131,<br>tri_c_comp16127_c0_seq2, tri_n_comp47054_c0_seq1, vo_c1_Locus_8919_Transcript_1/7_Confidence_0.667_Length_853,<br>vo_n2_Locus_470_Transcript_17/22_Confidence_0.343_Length_1148, tri_n_comp19581_c0_seq4,<br>vo_n2_Locus_470_Transcript_22/22_Confidence_0.143_Length_1080, vo_c2_Locus_108_Transcript_22/41_Confidence_0.124_Length_2147,<br>vo_c2_Locus_1219_Transcript_30/32_Confidence_0.123_Length_997, vo_n1_Locus_2341_Transcript_4/10_Confidence_0.071_Length_978,<br>tri_n_comp13606_c0_seq4, tri_n_comp17862_c0_seq6, vo_n1_Locus_5991_Transcript_1/3_Confidence_0.400_Length_1552,<br>vo_c1_Locus_509_Transcript_5/34_Confidence_0.145_Length_1149, vo_n3_Locus_270_Transcript_3/29_Confidence_0.270_Length_1101,<br>vo_c2_Locus_1219_Transcript_22/32_Confidence_0.260_Length_1159, vo_c2_Locus_19809_Transcript_1/6_Confidence_0.684_Length_1615,<br>tri_c_comp34836_c0_seq1, vo_n1_Locus_98_Transcript_8/32_Confidence_0.226_Length_924, tri_c_comp29972_c0_seq1,<br>vo_c2_Locus_1165_Transcript_4/5_Confidence_0.667_Length_1401, vo_c1_Locus_21378_Transcript_7/8_Confidence_0.462_Length_1323,<br>vo_n2_Locus_22747_Transcript_1/1_Confidence_0.000_Length_2618, vo_c2_Locus_17523_Transcript_1/1_Confidence_0.667_Length_2434,<br>vo_n2_Locus_13080_Transcript_1/2_Confidence_0.667_Length_2183, vo_c2_Locus_1219_Transcript_26/32_Confidence_0.247_Length_1220,<br>vo_c3_Locus_4006_Transcript_5/32_Confidence_0.244_Length_1136, vo_c3_Locus_2969_Transcript_2/8_Confidence_0.600_Length_2506,<br>vo_n1_Locus_38620_Transcript_1/1_Confidence_0.000_Length_978, vo_c3_Locus_114_Transcript_4/36_Confidence_0.138_Length_3659,<br>vo_n2_Locus_17424_Transcript_1/1_Confidence_0.000_Length_963, vo_n2_Locus_470_Transcript_5/22_Confidence_0.257_Length_986,<br>vo_n1_Locus_15083_Transcript_9/13_Confidence_0.571_Length_1739, vo_c2_Locus_33430_Transcript_1/1_Confidence_0.000_Length_1282,<br>vo_n1_Locus_25627_Transcript_1/1_Confidence_0.000_Length_2707, vo_n2_Locus_1282_Transcript_4/9_Confidence_0.190_Length_1582,<br>vo_n3_Locus_19627_Transcript_6/12_Confidence_0.600_Length_2746, vo_c2_Locus_1219_Transcript_14/32_Confidence_0.260_Length_1092,<br>vo_n2_Locus_28392_Transcript_1/2_Confidence_0.750_Length_1804, tri_n_comp15137_c0_seq2,<br>vo_c1_Locus_23005_Transcript_1/2_Confidence_0.667_Length_3051, vo_n2_Locus_20001_Transcript_1/1_Confidence_0.000_Length_1186,<br>vo_c1_Locus_509_Transcript_32/34_Confidence_0.174_Length_1077, vo_c3_Locus_33563_Transcript_1/1_Confidence_0.000_Length_1595,<br>tri_c_comp13959_c0_seq2, vo_c1_Locus_23962_Transcript_3/4_Confidence_0.500_Length_3209, tri_c_comp19627_c0_seq1,<br>vo_c1_Locus_22781_Transcript_2/2_Confidence_0.000_Length_1365, tri_c_comp18282_c0_seq7,<br>vo_c1_Locus_5206_Transcript_2/3_Confidence_0.400_Length_1079, tri_c_comp18292_c0_seq3,<br>vo_c1_Locus_32369_Transcript_1/1_Confidence_0.000_Length_1831, vo_n2_Locus_28392_Transcript_2/2_Confidence_0.000_Length_1844,<br>vo_c2_Locus_1219_Transcript_8/32_Confidence_0.274_Length_1040, vo_c3_Locus_114_Transcript_5/36_Confidence_0.008_Length_2112,<br>tri_c_comp18282_c0_seq4, tri_c_comp37737_c0_seq1, vo_n2_Locus_8614_Transcript_11/11_Confidence_0.000_Length_593,<br>vo_n2_Locus_931_Transcript_14/40_Confidence_0.143_Length_1853, vo_n3_Locus_270_Transcript_10/29_Confidence_0.317_Length_1136,<br>tri_c_comp12242_c0_seq1, vo_c1_Locus_37089_Transcript_1/1_Confidence_0.000_Length_1447,<br>vo_c3_Locus_37354_Transcript_1/1_Confidence_0.000_Length_673, vo_c1_Locus_8919_Transcript_6/7_Confidence_0.222_Length_969,<br>tri_c_comp55340_c0_seq1, vo_n1_Locus_19864_Transcript_2/2_Confidence_0.000_Length_2707,<br>vo_c3_Locus_21741_Transcript_5/9_Confidence_0.583_Length_1757, vo_n3_Locus_25600_Transcript_5/6_Confidence_0.375_Length_1777,<br>tri_n_comp58061_c0_seq1, vo_c1_Locus_2657_Transcript_1/1_Confidence_0.000_Length_1513,<br>vo_n2_Locus_23058_Transcript_1/1_Confidence_0.000_Length_1342, vo_n2_Locus_1937_Transcript_10/11_Confidence_0.615_Length_3407,<br>vo_n1_Locus_1386_Transcript_4/9_Confidence_0.688_Length_3621, vo_n1_Locus_1386_Transcript_9/9_Confidence_0.250_Length_2403,<br>vo_n1_Locus_1386_Transcript_5/9_Confidence_0.625_Length_3599, vo_n1_Locus_1386_Transcript_7/9_Confidence_0.438_Length_3591,<br>vo_n3_Locus_12585_Transcript_4/4_Confidence_0.000_Length_3579, vo_n2_Locus_1937_Transcript_10/11_Confidence_0.615_Length_3407,<br>vo_n1_Locus_1386_Transcript_4/9_Confidence_0.688_Length_3621, vo_n1_Locus_1386_Transcript_9/9_Confidence_0.250_Length_2403,<br>vo_n1_Locus_1386_Transcript_5/9_Confidence_0.625_Length_3599, vo_n1_Locus_1386_Transcript_7/9_Confidence_0.438_Length_3591,<br>vo_n3_Locus_12585_Transcript_4/4_Confidence_0.000_Length_3579, vo_n2_Locus_3821_Transcript_2/4_Confidence_0.750_Length_1813,<br>tri_c_comp16609_c0_seq3, vo_c3_Locus_278_Transcript_151/322_Confidence_0.010_Length_2531,<br>vo_c1_Locus_983_Transcript_13/109_Confidence_0.146_Length_3135, vo_n3_Locus_116_Transcript_56/74_Confidence_0.131_Length_1163,<br>vo_n3_Locus_116_Transcript_63/74_Confidence_0.131_Length_1150, vo_c3_Locus_5_Transcript_290/353_Confidence_0.015_Length_1363,<br>vo_n3_Locus_116_Transcript_59/74_Confidence_0.152_Length_2999, vo_n3_Locus_116_Transcript_61/74_Confidence_0.106_Length_3026,<br>vo_c2_Locus_1312_Transcript_38/70_Confidence_0.205_Length_3683, tri_n_comp20073_c0_seq1,<br>vo_n3_Locus_116_Transcript_62/74_Confidence_0.111_Length_2946, vo_c1_Locus_983_Transcript_106/109_Confidence_0.043_Length_1396,<br>vo_n1_Locus_2751_Transcript_51/52_Confidence_0.033_Length_408, vo_n2_Locus_409_Transcript_4/53_Confidence_0.270_Length_2832,<br>vo_n2_Locus_409_Transcript_31/53_Confidence_0.233_Length_3015, tri_n_comp20073_c0_seq2,<br>vo_c3_Locus_5_Transcript_287/353_Confidence_0.027_Length_2825, vo_c3_Locus_5_Transcript_272/353_Confidence_0.003_Length_394, |
|---------------------------|----------|----|----------------------------------------------------------------------------------------------------------------------------------------------------------------------------------------------------------------------------------------------------------------------------------------------------------------------------------------------------------------------------------------------------------------------------------------------------------------------------------------------|------------------------------------------|---------------------------------------------------------------------------------------------------------------------------------------------------------------------------------------------------------------------------------------------------------------------------------------------------------------------------------------------------------------------------------------------------------------------------------------------------------------------------------------------------------------------------------------------------------------------------------------------------------------------------------------------------------------------------------------------------------------------------------------------------------------------------------------------------------------------------------------------------------------------------------------------------------------------------------------------------------------------------------------------------------------------------------------------------------------------------------------------------------------------------------------------------------------------------------------------------------------------------------------------------------------------------------------------------------------------------------------------------------------------------------------------------------------------------------------------------------------------------------------------------------------------------------------------------------------------------------------------------------------------------------------------------------------------------------------------------------------------------------------------------------------------------------------------------------------------------------------------------------------------------------------------------------------------------------------------------------------------------------------------------------------------------------------------------------------------------------------------------------------------------------------------------------------------------------------------------------------------------------------------------------------------------------------------------------------------------------------------------------------------------------------------------------------------------------------------------------------------------------------------------------------------------------------------------------------------------------------------------------------------------------------------------------------------------------------------------------------------------------------------------------------------------------------------------------------------------------------------------------------------------------------------------------------------------------------------------------------------------------------------------------------------------------------------------------------------------------------------------------------------------------------------------------------------------------------------------------------------------------------------------------------------------------------------------------------------------------------------------------------------------------------------------------------------------------------------------------------------------------------------------------------------------------------------------------------------------------------------------------------------------------------------------------------------------------------------------------------------------------------------------------------------------------------------------------------------------------------------------------------------------------------------------------------------------------------------------------------------------------------------------------------------------------------------------------------------------------------------------------------------------------------------------------------------------------------------------------------------------------------------------------------------------------------------------------------------------------------------------------------------------------------------------------------------------------------------------------------------------------------------------------------------------------------------------------------------------------------------------------------------------------------------------------------------------------------------------------------------------------------------------------------------------------------------------------------------------------------------------------------------------------------------------------------------------------------------------------------------------------------------------------------------------------------------------------------------------------------------------------------------------------------------------------------------------------------------------------------------------------------------------------------------------------------------------------------------------------------------------------------------------------------------------------------------------------------------------------------------------------------------------------------------------------------------------------------------------------------------------------------------------------------------------------------------------------------------------------------------------------------------------------------------------------------------------------------------------------------------------------------------------------------------------------------------------------------------------------------------------------------------------------------------------------------------------------------------------------------------------------------------------------------------------------------------------------------------------------------------------------------------------------------------------------------------------------------------------------------------------------------------------------------------------------------------------------------------------------------------------------------------------------------------------------------------------------------------------------------------------------------------------------------------------------------------------------------------------------------------------------------------------------------------------------------------------------------------------------------------------------------------------------------------------------------------------------------------------------------------------|

|  |  |  |  |  |                                                                                                                                                                                                                                                                                                                                                                                                                                                                                                                                                                                                                                                                                                                                                                                                                                                                                                                                                                                                                                                                                                                                                                                                                                                                                                                                                                                                                                                                                                                                                                                                                                                                                                                                                                                                                                                                                                                |
|--|--|--|--|--|----------------------------------------------------------------------------------------------------------------------------------------------------------------------------------------------------------------------------------------------------------------------------------------------------------------------------------------------------------------------------------------------------------------------------------------------------------------------------------------------------------------------------------------------------------------------------------------------------------------------------------------------------------------------------------------------------------------------------------------------------------------------------------------------------------------------------------------------------------------------------------------------------------------------------------------------------------------------------------------------------------------------------------------------------------------------------------------------------------------------------------------------------------------------------------------------------------------------------------------------------------------------------------------------------------------------------------------------------------------------------------------------------------------------------------------------------------------------------------------------------------------------------------------------------------------------------------------------------------------------------------------------------------------------------------------------------------------------------------------------------------------------------------------------------------------------------------------------------------------------------------------------------------------|
|  |  |  |  |  | <p>vo_c3_Locus_5_Transcript_283/353_Confidence_0.027_Length_3003, vo_c3_Locus_5_Transcript_286/353_Confidence_0.029_Length_2529, vo_n3_Locus_116_Transcript_60/74_Confidence_0.167_Length_2999, vo_n3_Locus_116_Transcript_48/74_Confidence_0.096_Length_1128, vo_c3_Locus_5_Transcript_288/353_Confidence_0.019_Length_1679, vo_c2_Locus_2261_Transcript_1/2_Confidence_1.000_Length_2564, vo_c3_Locus_5948_Transcript_1/1_Confidence_0.000_Length_1027, vo_n2_Locus_16945_Transcript_1/3_Confidence_0.500_Length_1084, vo_c3_Locus_9925_Transcript_8/11_Confidence_0.263_Length_3550, vo_n1_Locus_11137_Transcript_5/5_Confidence_0.143_Length_2829, vo_n2_Locus_16945_Transcript_3/3_Confidence_0.000_Length_746, vo_n2_Locus_30747_Transcript_1/1_Confidence_0.000_Length_951, vo_c2_Locus_2261_Transcript_1/2_Confidence_1.000_Length_2564, vo_n1_Locus_9414_Transcript_8/13_Confidence_0.167_Length_606, vo_c1_Locus_40339_Transcript_1/1_Confidence_0.000_Length_1318, vo_c3_Locus_2031_Transcript_8/8_Confidence_0.111_Length_1389, vo_n1_Locus_11137_Transcript_5/5_Confidence_0.143_Length_2829, vo_c1_Locus_4675_Transcript_3/3_Confidence_0.200_Length_1348, vo_n2_Locus_30747_Transcript_1/1_Confidence_0.000_Length_951, vo_n2_Locus_636_Transcript_13/16_Confidence_0.222_Length_768, vo_c1_Locus_2815_Transcript_3/4_Confidence_0.200_Length_2244, vo_c3_Locus_9925_Transcript_8/11_Confidence_0.263_Length_3550, tri_n_comp42565_c0_seq1, vo_c2_Locus_189_Transcript_29/60_Confidence_0.015_Length_692, vo_n2_Locus_636_Transcript_16/16_Confidence_0.139_Length_616, vo_n2_Locus_636_Transcript_14/16_Confidence_0.222_Length_622, vo_n2_Locus_636_Transcript_5/16_Confidence_0.194_Length_591, vo_n2_Locus_636_Transcript_3/16_Confidence_0.306_Length_685, vo_n2_Locus_3831_Transcript_3/5_Confidence_0.286_Length_3559, vo_c2_Locus_13441_Transcript_1/2_Confidence_0.333_Length_3397</p> |
|--|--|--|--|--|----------------------------------------------------------------------------------------------------------------------------------------------------------------------------------------------------------------------------------------------------------------------------------------------------------------------------------------------------------------------------------------------------------------------------------------------------------------------------------------------------------------------------------------------------------------------------------------------------------------------------------------------------------------------------------------------------------------------------------------------------------------------------------------------------------------------------------------------------------------------------------------------------------------------------------------------------------------------------------------------------------------------------------------------------------------------------------------------------------------------------------------------------------------------------------------------------------------------------------------------------------------------------------------------------------------------------------------------------------------------------------------------------------------------------------------------------------------------------------------------------------------------------------------------------------------------------------------------------------------------------------------------------------------------------------------------------------------------------------------------------------------------------------------------------------------------------------------------------------------------------------------------------------------|

|                                   |          |    |                                                                                                                                                                                                                                                                                                                                                                                                                                     |                                  |                                                                                                                                                                                                                                                                                                                                                                                                                                                                                                                                                                                                                                                                                                                                                                                                                                                                                                                                                                                                                                                                                                                                                                                                                                                                                                                                                                                                                                                                                                                                                                                                                                                                                                                                                                                                                                                                                                                                                                                                                                                                                                                                                                                                                                                                                             |
|-----------------------------------|----------|----|-------------------------------------------------------------------------------------------------------------------------------------------------------------------------------------------------------------------------------------------------------------------------------------------------------------------------------------------------------------------------------------------------------------------------------------|----------------------------------|---------------------------------------------------------------------------------------------------------------------------------------------------------------------------------------------------------------------------------------------------------------------------------------------------------------------------------------------------------------------------------------------------------------------------------------------------------------------------------------------------------------------------------------------------------------------------------------------------------------------------------------------------------------------------------------------------------------------------------------------------------------------------------------------------------------------------------------------------------------------------------------------------------------------------------------------------------------------------------------------------------------------------------------------------------------------------------------------------------------------------------------------------------------------------------------------------------------------------------------------------------------------------------------------------------------------------------------------------------------------------------------------------------------------------------------------------------------------------------------------------------------------------------------------------------------------------------------------------------------------------------------------------------------------------------------------------------------------------------------------------------------------------------------------------------------------------------------------------------------------------------------------------------------------------------------------------------------------------------------------------------------------------------------------------------------------------------------------------------------------------------------------------------------------------------------------------------------------------------------------------------------------------------------------|
| Ascorbate and aldarate metabolism | map00053 | 11 | <p>ec:2.7.1.43 - glucuronokinase (phosphorylating),<br/> ec:2.7.7.44 - uridyllyltransferase,<br/> ec:1.1.3.8 - oxidase,<br/> ec:1.2.1.3 - dehydrogenase (NAD+),<br/> ec:2.4.1.17 - 1-naphthol glucuronyltransferase,<br/> ec:4.1.2.20 - aldolase,<br/> ec:1.8.5.1 - dehydrogenase (ascorbate),<br/> ec:1.3.2.3 - dehydrogenase,<br/> ec:1.1.1.19 - reductase,<br/> ec:1.1.1.22 - 6-dehydrogenase,<br/> ec:1.13.99.1 - oxygenase</p> | 2, 5, 1, 5, 13, 1, 1, 1, 2, 1, 7 | <p>tri_c_comp10536_c0_seq1, vo_c2_Locus_32726_Transcript_2/2_Confidence_0.000_Length_696,<br/> vo_n2_Locus_12563_Transcript_1/1_Confidence_0.000_Length_1886, vo_c1_Locus_21075_Transcript_1/3_Confidence_0.500_Length_1034,<br/> vo_n1_Locus_3509_Transcript_2/2_Confidence_0.000_Length_1894, tri_c_comp13085_c0_seq3, tri_c_comp54583_c0_seq1,<br/> vo_n2_Locus_15834_Transcript_1/1_Confidence_0.000_Length_1997, tri_c_comp55340_c0_seq1,<br/> vo_n1_Locus_19864_Transcript_2/2_Confidence_0.000_Length_2707, vo_c3_Locus_21741_Transcript_5/9_Confidence_0.583_Length_1757,<br/> vo_n3_Locus_25600_Transcript_5/6_Confidence_0.375_Length_1777, tri_n_comp58061_c0_seq1, tri_c_comp6209_c0_seq1,<br/> vo_c1_Locus_26340_Transcript_5/9_Confidence_0.600_Length_1699, tri_n_comp65990_c0_seq1,<br/> vo_n1_Locus_13372_Transcript_1/2_Confidence_0.333_Length_1687, vo_n2_Locus_34154_Transcript_3/3_Confidence_0.000_Length_2043,<br/> vo_n2_Locus_668_Transcript_17/17_Confidence_0.070_Length_2403, tri_c_comp58135_c0_seq1,<br/> vo_c3_Locus_16093_Transcript_1/1_Confidence_0.000_Length_1750, vo_n1_Locus_13372_Transcript_2/2_Confidence_0.000_Length_1314,<br/> vo_c2_Locus_24841_Transcript_3/3_Confidence_0.167_Length_3241, vo_n2_Locus_4774_Transcript_1/1_Confidence_0.000_Length_884,<br/> vo_c1_Locus_35615_Transcript_1/1_Confidence_0.000_Length_2075, vo_n1_Locus_15639_Transcript_1/1_Confidence_0.000_Length_1086,<br/> vo_c2_Locus_24762_Transcript_1/5_Confidence_0.625_Length_3436, tri_n_comp19474_c0_seq4,<br/> vo_n2_Locus_15834_Transcript_1/1_Confidence_0.000_Length_1997, vo_c1_Locus_13556_Transcript_2/2_Confidence_0.000_Length_1297,<br/> vo_n1_Locus_10504_Transcript_1/2_Confidence_0.750_Length_1211, vo_c1_Locus_11739_Transcript_1/3_Confidence_0.929_Length_1730,<br/> vo_c2_Locus_7343_Transcript_5/6_Confidence_0.333_Length_1107, vo_c1_Locus_16134_Transcript_10/12_Confidence_0.200_Length_544,<br/> vo_c3_Locus_9233_Transcript_4/5_Confidence_0.375_Length_1432, vo_c2_Locus_7343_Transcript_6/6_Confidence_0.083_Length_1098,<br/> vo_c1_Locus_16134_Transcript_6/12_Confidence_0.250_Length_448, vo_c1_Locus_16134_Transcript_8/12_Confidence_0.150_Length_721,<br/> vo_c1_Locus_16134_Transcript_7/12_Confidence_0.200_Length_748</p> |
|-----------------------------------|----------|----|-------------------------------------------------------------------------------------------------------------------------------------------------------------------------------------------------------------------------------------------------------------------------------------------------------------------------------------------------------------------------------------------------------------------------------------|----------------------------------|---------------------------------------------------------------------------------------------------------------------------------------------------------------------------------------------------------------------------------------------------------------------------------------------------------------------------------------------------------------------------------------------------------------------------------------------------------------------------------------------------------------------------------------------------------------------------------------------------------------------------------------------------------------------------------------------------------------------------------------------------------------------------------------------------------------------------------------------------------------------------------------------------------------------------------------------------------------------------------------------------------------------------------------------------------------------------------------------------------------------------------------------------------------------------------------------------------------------------------------------------------------------------------------------------------------------------------------------------------------------------------------------------------------------------------------------------------------------------------------------------------------------------------------------------------------------------------------------------------------------------------------------------------------------------------------------------------------------------------------------------------------------------------------------------------------------------------------------------------------------------------------------------------------------------------------------------------------------------------------------------------------------------------------------------------------------------------------------------------------------------------------------------------------------------------------------------------------------------------------------------------------------------------------------|

|                              |          |    |                                                                                                                                                                                                                                                                                                                                                                                                                 |                                |                                                                                                                                                                                                                                                                                                                                                                                                                                                                                                                                                                                                                                                                                                                                                                                                                                                                                                                                                                                                                                                                                                                                                                                                                                                                                                                                                                                                                                                                                                                                                                                                                                                                                                                                                                                                                                                                                                                                                                                                                                                                                                                                                                                                                                                                                                                                                                                                                                                                                        |
|------------------------------|----------|----|-----------------------------------------------------------------------------------------------------------------------------------------------------------------------------------------------------------------------------------------------------------------------------------------------------------------------------------------------------------------------------------------------------------------|--------------------------------|----------------------------------------------------------------------------------------------------------------------------------------------------------------------------------------------------------------------------------------------------------------------------------------------------------------------------------------------------------------------------------------------------------------------------------------------------------------------------------------------------------------------------------------------------------------------------------------------------------------------------------------------------------------------------------------------------------------------------------------------------------------------------------------------------------------------------------------------------------------------------------------------------------------------------------------------------------------------------------------------------------------------------------------------------------------------------------------------------------------------------------------------------------------------------------------------------------------------------------------------------------------------------------------------------------------------------------------------------------------------------------------------------------------------------------------------------------------------------------------------------------------------------------------------------------------------------------------------------------------------------------------------------------------------------------------------------------------------------------------------------------------------------------------------------------------------------------------------------------------------------------------------------------------------------------------------------------------------------------------------------------------------------------------------------------------------------------------------------------------------------------------------------------------------------------------------------------------------------------------------------------------------------------------------------------------------------------------------------------------------------------------------------------------------------------------------------------------------------------------|
| Steroid hormone biosynthesis | map00140 | 10 | <p>ec:2.1.1.6 - O-methyltransferase,<br/> ec:1.1.1.145 - dehydrogenase, ec:2.4.1.17 - 1-naphthol glucuronyltransferase,<br/> ec:1.1.1.239 - dehydrogenase (NAD+),<br/> ec:1.14.15.6 - monooxygenase (side-chain-cleaving), ec:2.8.2.15 - sulfotransferase, ec:1.1.1.51 - 17)beta-hydroxysteroid dehydrogenase, ec:1.1.1.62 - 17-dehydrogenase,<br/> ec:3.1.6.1 - sulfatase,<br/> ec:3.1.6.2 - arylsulfatase</p> | 12, 2, 13, 1, 1, 1, 9, 1, 2, 1 | <p>vo_c1_Locus_19524_Transcript_9/12_Confidence_0.615_Length_3975, vo_n1_Locus_23463_Transcript_3/4_Confidence_0.286_Length_1512, tri_c_comp32679_c0_seq1, tri_n_comp8749_c0_seq1, vo_c2_Locus_24901_Transcript_2/2_Confidence_0.000_Length_1355, vo_c3_Locus_26293_Transcript_1/4_Confidence_0.750_Length_2211, vo_n2_Locus_17803_Transcript_2/2_Confidence_0.250_Length_2793, tri_n_comp4208_c0_seq2, vo_n2_Locus_17803_Transcript_1/2_Confidence_0.500_Length_2823, vo_n3_Locus_12676_Transcript_1/1_Confidence_0.000_Length_3081, vo_c3_Locus_17106_Transcript_1/2_Confidence_1.000_Length_3041, vo_c3_Locus_26293_Transcript_2/4_Confidence_0.500_Length_2353, vo_c2_Locus_4806_Transcript_29/66_Confidence_0.103_Length_1536, vo_c3_Locus_11279_Transcript_9/10_Confidence_0.136_Length_1385, tri_c_comp6209_c0_seq1, vo_c1_Locus_26340_Transcript_5/9_Confidence_0.600_Length_1699, tri_n_comp65990_c0_seq1, vo_n1_Locus_13372_Transcript_1/2_Confidence_0.333_Length_1687, vo_n2_Locus_34154_Transcript_3/3_Confidence_0.000_Length_2043, vo_n2_Locus_668_Transcript_17/17_Confidence_0.070_Length_2403, tri_c_comp58135_c0_seq1, vo_c3_Locus_16093_Transcript_1/1_Confidence_0.000_Length_1750, vo_n1_Locus_13372_Transcript_2/2_Confidence_0.000_Length_1314, vo_c2_Locus_24841_Transcript_3/3_Confidence_0.167_Length_3241, vo_n2_Locus_4774_Transcript_1/1_Confidence_0.000_Length_884, vo_c1_Locus_35615_Transcript_1/1_Confidence_0.000_Length_2075, vo_n1_Locus_15639_Transcript_1/1_Confidence_0.000_Length_1086, vo_c1_Locus_2815_Transcript_3/4_Confidence_0.200_Length_2244, tri_c_comp28902_c0_seq1, vo_c3_Locus_1509_Transcript_1/2_Confidence_0.750_Length_1318, vo_n1_Locus_9414_Transcript_8/13_Confidence_0.167_Length_606, vo_c2_Locus_189_Transcript_29/60_Confidence_0.015_Length_692, vo_c3_Locus_2031_Transcript_8/8_Confidence_0.111_Length_1389, vo_n2_Locus_636_Transcript_16/16_Confidence_0.139_Length_616, vo_n2_Locus_636_Transcript_14/16_Confidence_0.222_Length_622, vo_n2_Locus_636_Transcript_5/16_Confidence_0.194_Length_591, vo_n2_Locus_636_Transcript_3/16_Confidence_0.306_Length_685, vo_n2_Locus_30747_Transcript_1/1_Confidence_0.000_Length_951, vo_n2_Locus_636_Transcript_13/16_Confidence_0.222_Length_768, vo_c1_Locus_2815_Transcript_3/4_Confidence_0.200_Length_2244, vo_n1_Locus_5276_Transcript_5/5_Confidence_0.000_Length_805, tri_c_comp17496_c0_seq2, vo_n1_Locus_5276_Transcript_5/5_Confidence_0.000_Length_805</p> |
|------------------------------|----------|----|-----------------------------------------------------------------------------------------------------------------------------------------------------------------------------------------------------------------------------------------------------------------------------------------------------------------------------------------------------------------------------------------------------------------|--------------------------------|----------------------------------------------------------------------------------------------------------------------------------------------------------------------------------------------------------------------------------------------------------------------------------------------------------------------------------------------------------------------------------------------------------------------------------------------------------------------------------------------------------------------------------------------------------------------------------------------------------------------------------------------------------------------------------------------------------------------------------------------------------------------------------------------------------------------------------------------------------------------------------------------------------------------------------------------------------------------------------------------------------------------------------------------------------------------------------------------------------------------------------------------------------------------------------------------------------------------------------------------------------------------------------------------------------------------------------------------------------------------------------------------------------------------------------------------------------------------------------------------------------------------------------------------------------------------------------------------------------------------------------------------------------------------------------------------------------------------------------------------------------------------------------------------------------------------------------------------------------------------------------------------------------------------------------------------------------------------------------------------------------------------------------------------------------------------------------------------------------------------------------------------------------------------------------------------------------------------------------------------------------------------------------------------------------------------------------------------------------------------------------------------------------------------------------------------------------------------------------------|

|                         |          |   |                                                                                                                                                                                                                                                                                                 |                             |                                                                                                                                                                                                                                                                                                                                                                                                                                                                                                                                                                                                                                                                                                                                                                                                                                                                                                                                                                                                                                                                                                                                                                                                                                                                                                                                                                                                                                                                                                                                                                                                                                                                                                                                                                                                                                                                                                                                                                                                                                                                                                                                                                                                                                                                                                                                                                                                                                                                                                                                                                                                                                                                                                                                                                                                                                                                                                                                                  |
|-------------------------|----------|---|-------------------------------------------------------------------------------------------------------------------------------------------------------------------------------------------------------------------------------------------------------------------------------------------------|-----------------------------|--------------------------------------------------------------------------------------------------------------------------------------------------------------------------------------------------------------------------------------------------------------------------------------------------------------------------------------------------------------------------------------------------------------------------------------------------------------------------------------------------------------------------------------------------------------------------------------------------------------------------------------------------------------------------------------------------------------------------------------------------------------------------------------------------------------------------------------------------------------------------------------------------------------------------------------------------------------------------------------------------------------------------------------------------------------------------------------------------------------------------------------------------------------------------------------------------------------------------------------------------------------------------------------------------------------------------------------------------------------------------------------------------------------------------------------------------------------------------------------------------------------------------------------------------------------------------------------------------------------------------------------------------------------------------------------------------------------------------------------------------------------------------------------------------------------------------------------------------------------------------------------------------------------------------------------------------------------------------------------------------------------------------------------------------------------------------------------------------------------------------------------------------------------------------------------------------------------------------------------------------------------------------------------------------------------------------------------------------------------------------------------------------------------------------------------------------------------------------------------------------------------------------------------------------------------------------------------------------------------------------------------------------------------------------------------------------------------------------------------------------------------------------------------------------------------------------------------------------------------------------------------------------------------------------------------------------|
| Fatty acid biosynthesis | map00061 | 9 | <p>ec:6.4.1.2 - carboxylase,<br/> ec:1.1.1.100 - reductase,<br/> ec:6.2.1.3 - ligase,<br/> ec:4.2.1.59 - dehydratase,<br/> ec:3.1.2.14 - hydrolase,<br/> ec:1.3.1.9 - reductase (NADH),<br/> ec:2.3.1.85 - synthase,<br/> ec:2.3.1.39 - S-malonyltransferase,<br/> ec:2.3.1.41 - synthase I</p> | 16, 4, 6, 1, 1, 1, 12, 6, 3 | <p>vo_n3_Locus_484_Transcript_6/12_Confidence_0.250_Length_1533, vo_c3_Locus_17332_Transcript_1/1_Confidence_0.333_Length_6493, vo_n3_Locus_696_Transcript_20/35_Confidence_0.473_Length_5396, vo_c3_Locus_2164_Transcript_38/39_Confidence_0.292_Length_6879, tri_n_comp41552_c0_seq1, vo_c2_Locus_1509_Transcript_1/47_Confidence_0.149_Length_2731, vo_c2_Locus_2193_Transcript_1/3_Confidence_0.667_Length_1218, vo_c1_Locus_860_Transcript_10/29_Confidence_0.571_Length_6744, vo_c2_Locus_1509_Transcript_11/47_Confidence_0.164_Length_2686, vo_n2_Locus_1751_Transcript_51/59_Confidence_0.207_Length_3566, vo_n2_Locus_15097_Transcript_1/1_Confidence_0.000_Length_3935, vo_n3_Locus_484_Transcript_5/12_Confidence_0.250_Length_1451, vo_c1_Locus_860_Transcript_11/29_Confidence_0.571_Length_6741, tri_c_comp19913_c0_seq3, vo_n2_Locus_1751_Transcript_37/59_Confidence_0.195_Length_3437, vo_c2_Locus_1509_Transcript_6/47_Confidence_0.149_Length_2592, vo_n3_Locus_484_Transcript_6/12_Confidence_0.250_Length_1533, vo_c2_Locus_12502_Transcript_2/2_Confidence_0.000_Length_781, vo_n3_Locus_484_Transcript_5/12_Confidence_0.250_Length_1451, vo_c2_Locus_2193_Transcript_1/3_Confidence_0.667_Length_1218, vo_c2_Locus_5191_Transcript_21/21_Confidence_0.029_Length_509, vo_c3_Locus_1178_Transcript_1/1_Confidence_0.667_Length_2367, vo_c2_Locus_3586_Transcript_1/4_Confidence_0.667_Length_2244, vo_c2_Locus_5191_Transcript_16/21_Confidence_0.457_Length_3699, tri_c_comp29321_c0_seq1, tri_c_comp48942_c0_seq1, vo_c1_Locus_4631_Transcript_1/1_Confidence_0.000_Length_1088, vo_n2_Locus_22507_Transcript_2/2_Confidence_0.000_Length_2345, vo_c2_Locus_12009_Transcript_1/1_Confidence_0.000_Length_1400, vo_n1_Locus_6804_Transcript_2/3_Confidence_0.400_Length_3660, tri_c_comp9784_c0_seq2, tri_n_comp48567_c0_seq1, vo_c3_Locus_21966_Transcript_1/1_Confidence_0.000_Length_3835, vo_n2_Locus_7705_Transcript_1/1_Confidence_0.000_Length_3757, tri_c_comp37045_c0_seq1, tri_c_comp84696_c0_seq1, vo_c3_Locus_606_Transcript_7/16_Confidence_0.357_Length_3424, vo_n3_Locus_12727_Transcript_1/1_Confidence_0.000_Length_3602, vo_c3_Locus_30099_Transcript_6/9_Confidence_0.375_Length_2510, vo_c1_Locus_15119_Transcript_1/2_Confidence_0.333_Length_1463, vo_c3_Locus_3641_Transcript_5/5_Confidence_0.000_Length_2445, vo_c3_Locus_5147_Transcript_5/7_Confidence_0.688_Length_1975, vo_n2_Locus_6651_Transcript_2/2_Confidence_0.500_Length_2591, vo_c3_Locus_711_Transcript_3/3_Confidence_0.200_Length_1576, vo_n3_Locus_4536_Transcript_1/2_Confidence_0.333_Length_1865, vo_n1_Locus_6730_Transcript_2/6_Confidence_0.667_Length_1479, vo_c2_Locus_1667_Transcript_12/21_Confidence_0.122_Length_1452, vo_c3_Locus_422_Transcript_1/3_Confidence_0.857_Length_2914, vo_n1_Locus_8253_Transcript_1/1_Confidence_0.000_Length_1430, vo_n2_Locus_4712_Transcript_1/2_Confidence_0.333_Length_1867</p> |
|-------------------------|----------|---|-------------------------------------------------------------------------------------------------------------------------------------------------------------------------------------------------------------------------------------------------------------------------------------------------|-----------------------------|--------------------------------------------------------------------------------------------------------------------------------------------------------------------------------------------------------------------------------------------------------------------------------------------------------------------------------------------------------------------------------------------------------------------------------------------------------------------------------------------------------------------------------------------------------------------------------------------------------------------------------------------------------------------------------------------------------------------------------------------------------------------------------------------------------------------------------------------------------------------------------------------------------------------------------------------------------------------------------------------------------------------------------------------------------------------------------------------------------------------------------------------------------------------------------------------------------------------------------------------------------------------------------------------------------------------------------------------------------------------------------------------------------------------------------------------------------------------------------------------------------------------------------------------------------------------------------------------------------------------------------------------------------------------------------------------------------------------------------------------------------------------------------------------------------------------------------------------------------------------------------------------------------------------------------------------------------------------------------------------------------------------------------------------------------------------------------------------------------------------------------------------------------------------------------------------------------------------------------------------------------------------------------------------------------------------------------------------------------------------------------------------------------------------------------------------------------------------------------------------------------------------------------------------------------------------------------------------------------------------------------------------------------------------------------------------------------------------------------------------------------------------------------------------------------------------------------------------------------------------------------------------------------------------------------------------------|

|                      |          |   |                                                                                                                                                                                                                                                                                        |                           |                                                                                                                                                                                                                                                                                                                                                                                                                                                                                                                                                                                                                                              |
|----------------------|----------|---|----------------------------------------------------------------------------------------------------------------------------------------------------------------------------------------------------------------------------------------------------------------------------------------|---------------------------|----------------------------------------------------------------------------------------------------------------------------------------------------------------------------------------------------------------------------------------------------------------------------------------------------------------------------------------------------------------------------------------------------------------------------------------------------------------------------------------------------------------------------------------------------------------------------------------------------------------------------------------------|
| Steroid biosynthesis | map00100 | 9 | <p>ec:1.3.1.72 - reductase,<br/> ec:2.5.1.21 - synthase,<br/> ec:2.1.1.41 - 24-C-methyltransferase,<br/> ec:5.3.3.5 - Delta-isomerase,<br/> ec:1.14.13.72 - monooxygenase, ec:3.1.1.13 - esterase, ec:2.3.1.26 - O-acyltransferase, ec:5.4.99.7 - synthase, ec:5.4.99.8 - synthase</p> | 1, 1, 2, 1, 1, 2, 1, 1, 1 | <p>tri_c_comp55318_c0_seq1, vo_n2_Locus_19315_Transcript_2/2_Confidence_0.000_Length_1802, vo_c2_Locus_11041_Transcript_1/2_Confidence_0.750_Length_1378, vo_c2_Locus_11041_Transcript_2/2_Confidence_0.000_Length_1411, vo_n1_Locus_8018_Transcript_1/1_Confidence_0.000_Length_852, vo_c1_Locus_12613_Transcript_1/1_Confidence_0.000_Length_2362, tri_c_comp14506_c0_seq1, vo_n2_Locus_16855_Transcript_8/9_Confidence_0.636_Length_2285, vo_n2_Locus_23058_Transcript_1/1_Confidence_0.000_Length_1342, vo_c2_Locus_33620_Transcript_1/1_Confidence_0.000_Length_2614, vo_c2_Locus_33620_Transcript_1/1_Confidence_0.000_Length_2614</p> |
|----------------------|----------|---|----------------------------------------------------------------------------------------------------------------------------------------------------------------------------------------------------------------------------------------------------------------------------------------|---------------------------|----------------------------------------------------------------------------------------------------------------------------------------------------------------------------------------------------------------------------------------------------------------------------------------------------------------------------------------------------------------------------------------------------------------------------------------------------------------------------------------------------------------------------------------------------------------------------------------------------------------------------------------------|

|                           |          |   |                                                                                                                                                                                                                                                                                     |                               |                                                                                                                                                                                                                                                                                                                                                                                                                                                                                                                                                                                                                                                                                                                                                                                                                                                                                                                                                                                                                                                                                                                                                                                                                                                                                                                                                                                                                                                                                                                                                                                                                                                                                                                                                                                                                                                                                                                                                                                                                                                                                                                                                                                                                                                                                                                                                                                                                                                                                                                          |
|---------------------------|----------|---|-------------------------------------------------------------------------------------------------------------------------------------------------------------------------------------------------------------------------------------------------------------------------------------|-------------------------------|--------------------------------------------------------------------------------------------------------------------------------------------------------------------------------------------------------------------------------------------------------------------------------------------------------------------------------------------------------------------------------------------------------------------------------------------------------------------------------------------------------------------------------------------------------------------------------------------------------------------------------------------------------------------------------------------------------------------------------------------------------------------------------------------------------------------------------------------------------------------------------------------------------------------------------------------------------------------------------------------------------------------------------------------------------------------------------------------------------------------------------------------------------------------------------------------------------------------------------------------------------------------------------------------------------------------------------------------------------------------------------------------------------------------------------------------------------------------------------------------------------------------------------------------------------------------------------------------------------------------------------------------------------------------------------------------------------------------------------------------------------------------------------------------------------------------------------------------------------------------------------------------------------------------------------------------------------------------------------------------------------------------------------------------------------------------------------------------------------------------------------------------------------------------------------------------------------------------------------------------------------------------------------------------------------------------------------------------------------------------------------------------------------------------------------------------------------------------------------------------------------------------------|
| Selenocompound metabolism | map00450 | 9 | <p>ec:1.8.1.9 - reductase,<br/> ec:2.1.1.13 - synthase,<br/> ec:4.4.1.8 - beta-lyase,<br/> ec:4.4.1.1 - gamma-lyase,<br/> ec:1.97.1.9 - reductase,<br/> ec:4.4.1.16 - lyase,<br/> ec:2.7.7.4 - adenylyltransferase,<br/> ec:2.7.9.3 - water dikinase,<br/> ec:6.1.1.10 - ligase</p> | 14, 4, 3, 7,<br>1, 4, 7, 2, 1 | <p>vo_n2_Locus_6953_Transcript_4/5_Confidence_0.444_Length_2181, vo_c2_Locus_5797_Transcript_1/2_Confidence_0.400_Length_1712, vo_c2_Locus_30373_Transcript_4/4_Confidence_0.000_Length_988, vo_c2_Locus_30373_Transcript_3/4_Confidence_0.667_Length_743, vo_n3_Locus_1380_Transcript_5/6_Confidence_0.273_Length_1217, tri_n_comp7648_c0_seq1, vo_n3_Locus_4780_Transcript_1/1_Confidence_0.000_Length_1276, vo_c1_Locus_3141_Transcript_7/36_Confidence_0.102_Length_2742, vo_n2_Locus_5095_Transcript_1/2_Confidence_0.667_Length_820, tri_n_comp63089_c0_seq1, tri_n_comp41310_c0_seq1, vo_c2_Locus_11806_Transcript_1/2_Confidence_0.333_Length_2149, vo_n2_Locus_6286_Transcript_1/1_Confidence_0.000_Length_1634, vo_c1_Locus_22833_Transcript_2/3_Confidence_0.500_Length_897, vo_n3_Locus_12898_Transcript_5/14_Confidence_0.429_Length_3637, vo_n2_Locus_4083_Transcript_7/15_Confidence_0.571_Length_4447, vo_c3_Locus_876_Transcript_5/9_Confidence_0.526_Length_3245, vo_n2_Locus_4083_Transcript_2/15_Confidence_0.619_Length_4830, vo_n2_Locus_7374_Transcript_2/3_Confidence_0.750_Length_1746, vo_c2_Locus_31468_Transcript_4/5_Confidence_0.667_Length_1579, vo_n1_Locus_3498_Transcript_1/3_Confidence_0.600_Length_1462, tri_c_comp42317_c0_seq1, vo_n2_Locus_7374_Transcript_2/3_Confidence_0.750_Length_1746, vo_n2_Locus_8711_Transcript_5/5_Confidence_0.067_Length_1558, vo_c2_Locus_11984_Transcript_2/6_Confidence_0.385_Length_1557, vo_c2_Locus_31468_Transcript_4/5_Confidence_0.667_Length_1579, vo_n1_Locus_3498_Transcript_1/3_Confidence_0.600_Length_1462, tri_c_comp30049_c0_seq1, vo_c2_Locus_5797_Transcript_1/2_Confidence_0.400_Length_1712, tri_n_comp37185_c0_seq1, vo_c1_Locus_38066_Transcript_1/1_Confidence_0.000_Length_1674, vo_c2_Locus_14495_Transcript_1/4_Confidence_0.714_Length_1830, vo_c3_Locus_9097_Transcript_2/4_Confidence_0.600_Length_3293, vo_n2_Locus_1711_Transcript_9/11_Confidence_0.320_Length_3674, vo_n2_Locus_1711_Transcript_8/11_Confidence_0.360_Length_2026, vo_c2_Locus_2008_Transcript_2/7_Confidence_0.231_Length_3495, vo_c1_Locus_18424_Transcript_1/2_Confidence_0.750_Length_906, tri_n_comp20038_c0_seq1, vo_n2_Locus_1711_Transcript_2/11_Confidence_0.280_Length_4019, vo_c1_Locus_18424_Transcript_2/2_Confidence_0.000_Length_956, vo_c3_Locus_7943_Transcript_1/2_Confidence_0.750_Length_1349, vo_n2_Locus_1308_Transcript_1/2_Confidence_1.000_Length_1311, vo_c1_Locus_27004_Transcript_1/1_Confidence_0.000_Length_2081</p> |
|---------------------------|----------|---|-------------------------------------------------------------------------------------------------------------------------------------------------------------------------------------------------------------------------------------------------------------------------------------|-------------------------------|--------------------------------------------------------------------------------------------------------------------------------------------------------------------------------------------------------------------------------------------------------------------------------------------------------------------------------------------------------------------------------------------------------------------------------------------------------------------------------------------------------------------------------------------------------------------------------------------------------------------------------------------------------------------------------------------------------------------------------------------------------------------------------------------------------------------------------------------------------------------------------------------------------------------------------------------------------------------------------------------------------------------------------------------------------------------------------------------------------------------------------------------------------------------------------------------------------------------------------------------------------------------------------------------------------------------------------------------------------------------------------------------------------------------------------------------------------------------------------------------------------------------------------------------------------------------------------------------------------------------------------------------------------------------------------------------------------------------------------------------------------------------------------------------------------------------------------------------------------------------------------------------------------------------------------------------------------------------------------------------------------------------------------------------------------------------------------------------------------------------------------------------------------------------------------------------------------------------------------------------------------------------------------------------------------------------------------------------------------------------------------------------------------------------------------------------------------------------------------------------------------------------------|



|                         |          |   |                                                                                                                                                                                                                                                                                                         |                             |                                                                                                                                                                                                                                                                                                                                                                                                                                                                                                                                                                                                                                                                                                                                                                                                                                                                                                                                                                                                                                                                                                                                                                                                                                                                                                                                                                                                                                                                                                                                                                                                                                                                                                                                                                                                                                                                                                                                                                                                                                                                                                                                                                                                                                                                                                                                                                                                                                                                                                                                                                                                                                                                                                                                                                                                                                                                                                                                                                                                                                                                                                                                                                                                                                                                                                                                                                                                                                                                                                                                                                                                                                                                                                                                                                                                                                                                                                                                                    |
|-------------------------|----------|---|---------------------------------------------------------------------------------------------------------------------------------------------------------------------------------------------------------------------------------------------------------------------------------------------------------|-----------------------------|----------------------------------------------------------------------------------------------------------------------------------------------------------------------------------------------------------------------------------------------------------------------------------------------------------------------------------------------------------------------------------------------------------------------------------------------------------------------------------------------------------------------------------------------------------------------------------------------------------------------------------------------------------------------------------------------------------------------------------------------------------------------------------------------------------------------------------------------------------------------------------------------------------------------------------------------------------------------------------------------------------------------------------------------------------------------------------------------------------------------------------------------------------------------------------------------------------------------------------------------------------------------------------------------------------------------------------------------------------------------------------------------------------------------------------------------------------------------------------------------------------------------------------------------------------------------------------------------------------------------------------------------------------------------------------------------------------------------------------------------------------------------------------------------------------------------------------------------------------------------------------------------------------------------------------------------------------------------------------------------------------------------------------------------------------------------------------------------------------------------------------------------------------------------------------------------------------------------------------------------------------------------------------------------------------------------------------------------------------------------------------------------------------------------------------------------------------------------------------------------------------------------------------------------------------------------------------------------------------------------------------------------------------------------------------------------------------------------------------------------------------------------------------------------------------------------------------------------------------------------------------------------------------------------------------------------------------------------------------------------------------------------------------------------------------------------------------------------------------------------------------------------------------------------------------------------------------------------------------------------------------------------------------------------------------------------------------------------------------------------------------------------------------------------------------------------------------------------------------------------------------------------------------------------------------------------------------------------------------------------------------------------------------------------------------------------------------------------------------------------------------------------------------------------------------------------------------------------------------------------------------------------------------------------------------------------------|
| Sphingolipid metabolism | map00600 | 9 | <p>ec:3.2.1.45 - psychosine hydrolase, ec:3.5.1.23 - acylsphingosine deacylase, ec:3.2.1.22 - melibiase, ec:3.2.1.23 - lactase (ambiguous), ec:3.2.1.18 - neuraminidase, ec:2.3.1.50 - C-palmitoyltransferase, ec:2.8.2.11 - sulfotransferase, ec:3.1.6.8 - arylsulfatase A, ec:3.1.6.1 - sulfatase</p> | 4, 3, 5, 6, 16, 1, 31, 1, 2 | <p>tri_n_comp56355_c0_seq1, vo_n2_Locus_20092_Transcript_5/7_Confidence_0.636_Length_1860, vo_c3_Locus_14755_Transcript_5/5_Confidence_0.000_Length_1578, vo_n2_Locus_20092_Transcript_2/7_Confidence_0.364_Length_599, vo_n2_Locus_5568_Transcript_1/1_Confidence_0.000_Length_1060, tri_n_comp69072_c0_seq1, tri_c_comp66265_c0_seq1, vo_c2_Locus_17150_Transcript_58/102_Confidence_0.019_Length_2519, vo_n2_Locus_11259_Transcript_1/2_Confidence_0.333_Length_2880, tri_c_comp44396_c0_seq1, vo_n2_Locus_31986_Transcript_2/2_Confidence_0.333_Length_2185, vo_n2_Locus_20375_Transcript_1/2_Confidence_0.333_Length_1577, tri_c_comp12867_c0_seq1, vo_n2_Locus_1748_Transcript_2/3_Confidence_0.333_Length_4221, tri_n_comp70995_c0_seq1, vo_c2_Locus_26351_Transcript_1/2_Confidence_0.500_Length_4013, vo_c3_Locus_8047_Transcript_1/2_Confidence_0.333_Length_4021, vo_c3_Locus_32079_Transcript_2/2_Confidence_0.250_Length_2113, vo_c3_Locus_31_Transcript_21/79_Confidence_0.028_Length_1439, tri_n_comp18659_c0_seq1, vo_c3_Locus_9066_Transcript_2/6_Confidence_0.500_Length_1163, vo_c1_Locus_32359_Transcript_2/2_Confidence_0.000_Length_1561, vo_n3_Locus_1645_Transcript_4/7_Confidence_0.417_Length_2558, vo_c2_Locus_4429_Transcript_8/10_Confidence_0.385_Length_2463, tri_c_comp55333_c0_seq1, vo_n1_Locus_15621_Transcript_2/2_Confidence_0.000_Length_1596, vo_n3_Locus_21759_Transcript_2/5_Confidence_0.143_Length_653, vo_c2_Locus_4429_Transcript_7/10_Confidence_0.538_Length_2541, vo_n2_Locus_26415_Transcript_1/1_Confidence_0.000_Length_1376, vo_c2_Locus_6498_Transcript_10/10_Confidence_0.158_Length_1599, tri_n_comp15822_c0_seq1, vo_c1_Locus_27062_Transcript_5/7_Confidence_0.538_Length_1304, tri_n_comp15822_c0_seq2, vo_c3_Locus_9066_Transcript_1/6_Confidence_0.375_Length_846, vo_n1_Locus_7163_Transcript_2/5_Confidence_0.429_Length_3834, vo_c2_Locus_11068_Transcript_7/15_Confidence_0.088_Length_2478, tri_c_comp19434_c0_seq20, vo_n3_Locus_427_Transcript_152/175_Confidence_0.022_Length_1587, vo_n2_Locus_39296_Transcript_1/14_Confidence_0.615_Length_1447, vo_n1_Locus_1282_Transcript_21/28_Confidence_0.267_Length_1443, vo_c3_Locus_12992_Transcript_17/18_Confidence_0.438_Length_1753, vo_c3_Locus_10470_Transcript_2/7_Confidence_0.500_Length_1430, tri_c_comp18408_c0_seq3, vo_c3_Locus_15517_Transcript_3/3_Confidence_0.500_Length_1506, vo_c1_Locus_2146_Transcript_6/28_Confidence_0.438_Length_1427, tri_c_comp10922_c0_seq1, vo_n1_Locus_1282_Transcript_25/28_Confidence_0.250_Length_1445, vo_n1_Locus_1282_Transcript_18/28_Confidence_0.350_Length_1518, vo_c3_Locus_12992_Transcript_1/18_Confidence_0.562_Length_1707, vo_n1_Locus_1282_Transcript_20/28_Confidence_0.250_Length_1445, vo_n3_Locus_23180_Transcript_1/1_Confidence_0.000_Length_1372, vo_c3_Locus_12992_Transcript_2/18_Confidence_0.438_Length_1659, vo_n2_Locus_3_Transcript_18204/24291_Confidence_0.000_Length_1558, vo_c3_Locus_12992_Transcript_13/18_Confidence_0.562_Length_1789, vo_c3_Locus_15917_Transcript_1/2_Confidence_0.667_Length_1528, vo_c3_Locus_6108_Transcript_1/20_Confidence_0.667_Length_1501, vo_n2_Locus_1168_Transcript_12/19_Confidence_0.567_Length_1720, vo_c1_Locus_29045_Transcript_1/2_Confidence_0.600_Length_1495, vo_c3_Locus_12992_Transcript_14/18_Confidence_0.719_Length_1813, vo_c2_Locus_2351_Transcript_10/22_Confidence_0.081_Length_950, vo_c3_Locus_16912_Transcript_3/4_Confidence_0.500_Length_1461, vo_c2_Locus_557_Transcript_42/127_Confidence_0.063_Length_2107, vo_n1_Locus_1282_Transcript_28/28_Confidence_0.133_Length_1479, vo_c3_Locus_21516_Transcript_2/3_Confidence_0.333_Length_2294, vo_n2_Locus_4388_Transcript_1/1_Confidence_0.000_Length_1497, tri_n_comp20471_c0_seq2, vo_n1_Locus_5276_Transcript_5/5_Confidence_0.000_Length_805, vo_n1_Locus_5276_Transcript_5/5_Confidence_0.000_Length_805, tri_c_comp17496_c0_seq2</p> |
|-------------------------|----------|---|---------------------------------------------------------------------------------------------------------------------------------------------------------------------------------------------------------------------------------------------------------------------------------------------------------|-----------------------------|----------------------------------------------------------------------------------------------------------------------------------------------------------------------------------------------------------------------------------------------------------------------------------------------------------------------------------------------------------------------------------------------------------------------------------------------------------------------------------------------------------------------------------------------------------------------------------------------------------------------------------------------------------------------------------------------------------------------------------------------------------------------------------------------------------------------------------------------------------------------------------------------------------------------------------------------------------------------------------------------------------------------------------------------------------------------------------------------------------------------------------------------------------------------------------------------------------------------------------------------------------------------------------------------------------------------------------------------------------------------------------------------------------------------------------------------------------------------------------------------------------------------------------------------------------------------------------------------------------------------------------------------------------------------------------------------------------------------------------------------------------------------------------------------------------------------------------------------------------------------------------------------------------------------------------------------------------------------------------------------------------------------------------------------------------------------------------------------------------------------------------------------------------------------------------------------------------------------------------------------------------------------------------------------------------------------------------------------------------------------------------------------------------------------------------------------------------------------------------------------------------------------------------------------------------------------------------------------------------------------------------------------------------------------------------------------------------------------------------------------------------------------------------------------------------------------------------------------------------------------------------------------------------------------------------------------------------------------------------------------------------------------------------------------------------------------------------------------------------------------------------------------------------------------------------------------------------------------------------------------------------------------------------------------------------------------------------------------------------------------------------------------------------------------------------------------------------------------------------------------------------------------------------------------------------------------------------------------------------------------------------------------------------------------------------------------------------------------------------------------------------------------------------------------------------------------------------------------------------------------------------------------------------------------------------------------------|

|                       |          |   |                                                                                                                                                                                                                                                                                                            |                            |                                                                                                                                                                                                                                                                                                                                                                                                                                                                                                                                                                                                                                                                                                                                                                                                                                                                                                                                                                                                                                                                                                                                                                                                                                                                                                                                                                                                                                                                                                                                                                                                                                                                                                                                                                                                                                                                                                                                                                                                                                                                                                                                                                                                                                                                                                                                                                                                                                                                                                                                                                                                                                                                                                                                                                                                    |
|-----------------------|----------|---|------------------------------------------------------------------------------------------------------------------------------------------------------------------------------------------------------------------------------------------------------------------------------------------------------------|----------------------------|----------------------------------------------------------------------------------------------------------------------------------------------------------------------------------------------------------------------------------------------------------------------------------------------------------------------------------------------------------------------------------------------------------------------------------------------------------------------------------------------------------------------------------------------------------------------------------------------------------------------------------------------------------------------------------------------------------------------------------------------------------------------------------------------------------------------------------------------------------------------------------------------------------------------------------------------------------------------------------------------------------------------------------------------------------------------------------------------------------------------------------------------------------------------------------------------------------------------------------------------------------------------------------------------------------------------------------------------------------------------------------------------------------------------------------------------------------------------------------------------------------------------------------------------------------------------------------------------------------------------------------------------------------------------------------------------------------------------------------------------------------------------------------------------------------------------------------------------------------------------------------------------------------------------------------------------------------------------------------------------------------------------------------------------------------------------------------------------------------------------------------------------------------------------------------------------------------------------------------------------------------------------------------------------------------------------------------------------------------------------------------------------------------------------------------------------------------------------------------------------------------------------------------------------------------------------------------------------------------------------------------------------------------------------------------------------------------------------------------------------------------------------------------------------------|
| Riboflavin metabolism | map00740 | 9 | <p>ec:1.1.1.193 - reductase,<br/> ec:4.1.99.12 - synthase,<br/> ec:2.7.1.26 - kinase,<br/> ec:3.1.3.2 - phosphatase,<br/> ec:3.6.1.9 - diphosphatase,<br/> ec:2.7.7.2 - synthetase,<br/> ec:1.5.1.41 - reductase [NAD(P)H],<br/> ec:1.5.1.30 - reductase (NADPH),<br/> ec:3.5.4.25 - cyclohydrolase II</p> | 3, 7, 4, 12, 7, 4, 2, 2, 8 | <p>vo_n2_Locus_618_Transcript_2/13_Confidence_0.167_Length_2515, vo_c1_Locus_11577_Transcript_4/6_Confidence_0.222_Length_639, vo_c1_Locus_11577_Transcript_6/6_Confidence_0.000_Length_903, vo_c3_Locus_2926_Transcript_1/2_Confidence_1.000_Length_2091, vo_n3_Locus_3121_Transcript_2/3_Confidence_0.333_Length_1665, vo_n1_Locus_10359_Transcript_3/4_Confidence_0.444_Length_1674, vo_n2_Locus_5837_Transcript_4/4_Confidence_0.125_Length_2033, tri_n_comp29206_c0_seq1, vo_n1_Locus_4471_Transcript_1/4_Confidence_0.143_Length_1138, vo_n2_Locus_5837_Transcript_2/4_Confidence_0.500_Length_2218, vo_c2_Locus_1082_Transcript_2/3_Confidence_0.750_Length_1327, vo_n2_Locus_19354_Transcript_2/2_Confidence_0.000_Length_489, tri_c_comp14768_c0_seq1, vo_c1_Locus_23679_Transcript_3/3_Confidence_0.000_Length_1296, vo_n1_Locus_10075_Transcript_1/1_Confidence_0.000_Length_4386, tri_n_comp68385_c0_seq1, tri_c_comp18093_c0_seq1, vo_c1_Locus_25793_Transcript_1/2_Confidence_0.750_Length_1400, tri_n_comp42405_c0_seq1, vo_c1_Locus_11402_Transcript_1/1_Confidence_0.000_Length_1729, vo_c3_Locus_33014_Transcript_1/2_Confidence_0.750_Length_901, vo_c3_Locus_20317_Transcript_1/1_Confidence_0.000_Length_1353, vo_n1_Locus_39709_Transcript_1/1_Confidence_0.000_Length_555, vo_n2_Locus_2911_Transcript_3/13_Confidence_0.062_Length_1930, vo_n2_Locus_13424_Transcript_1/4_Confidence_0.667_Length_3514, vo_n1_Locus_10461_Transcript_1/2_Confidence_0.750_Length_1757, vo_c2_Locus_35825_Transcript_1/2_Confidence_0.500_Length_995, vo_c2_Locus_35825_Transcript_2/2_Confidence_0.000_Length_972, tri_n_comp34093_c0_seq1, vo_c2_Locus_11939_Transcript_1/4_Confidence_0.273_Length_1336, vo_c1_Locus_18906_Transcript_3/4_Confidence_0.400_Length_1298, vo_c2_Locus_26280_Transcript_1/1_Confidence_0.000_Length_1316, vo_c1_Locus_31652_Transcript_2/3_Confidence_0.429_Length_964, vo_c2_Locus_1082_Transcript_2/3_Confidence_0.750_Length_1327, vo_n2_Locus_19354_Transcript_2/2_Confidence_0.000_Length_489, tri_c_comp14768_c0_seq1, vo_c1_Locus_23679_Transcript_3/3_Confidence_0.000_Length_1296, vo_n2_Locus_14866_Transcript_1/2_Confidence_0.833_Length_1123, tri_c_comp43873_c0_seq1, vo_n2_Locus_14866_Transcript_1/2_Confidence_0.833_Length_1123, tri_c_comp43873_c0_seq1, vo_c3_Locus_2926_Transcript_1/2_Confidence_1.000_Length_2091, vo_n3_Locus_3121_Transcript_2/3_Confidence_0.333_Length_1665, vo_n2_Locus_2691_Transcript_2/12_Confidence_0.405_Length_3058, vo_n2_Locus_5837_Transcript_4/4_Confidence_0.125_Length_2033, tri_n_comp29206_c0_seq1, vo_n1_Locus_4471_Transcript_1/4_Confidence_0.143_Length_1138, vo_n2_Locus_5837_Transcript_2/4_Confidence_0.500_Length_2218, vo_n2_Locus_2691_Transcript_8/12_Confidence_0.310_Length_2836</p> |
|-----------------------|----------|---|------------------------------------------------------------------------------------------------------------------------------------------------------------------------------------------------------------------------------------------------------------------------------------------------------------|----------------------------|----------------------------------------------------------------------------------------------------------------------------------------------------------------------------------------------------------------------------------------------------------------------------------------------------------------------------------------------------------------------------------------------------------------------------------------------------------------------------------------------------------------------------------------------------------------------------------------------------------------------------------------------------------------------------------------------------------------------------------------------------------------------------------------------------------------------------------------------------------------------------------------------------------------------------------------------------------------------------------------------------------------------------------------------------------------------------------------------------------------------------------------------------------------------------------------------------------------------------------------------------------------------------------------------------------------------------------------------------------------------------------------------------------------------------------------------------------------------------------------------------------------------------------------------------------------------------------------------------------------------------------------------------------------------------------------------------------------------------------------------------------------------------------------------------------------------------------------------------------------------------------------------------------------------------------------------------------------------------------------------------------------------------------------------------------------------------------------------------------------------------------------------------------------------------------------------------------------------------------------------------------------------------------------------------------------------------------------------------------------------------------------------------------------------------------------------------------------------------------------------------------------------------------------------------------------------------------------------------------------------------------------------------------------------------------------------------------------------------------------------------------------------------------------------------|

|                                             |          |   |                                                                                                                                                                                                                                                                       |                        |                                                                                                                                                                                                                                                                                                                                                                                                                                                                                                                                                                                                                                                                                                                                                                                                                                                                                                                            |
|---------------------------------------------|----------|---|-----------------------------------------------------------------------------------------------------------------------------------------------------------------------------------------------------------------------------------------------------------------------|------------------------|----------------------------------------------------------------------------------------------------------------------------------------------------------------------------------------------------------------------------------------------------------------------------------------------------------------------------------------------------------------------------------------------------------------------------------------------------------------------------------------------------------------------------------------------------------------------------------------------------------------------------------------------------------------------------------------------------------------------------------------------------------------------------------------------------------------------------------------------------------------------------------------------------------------------------|
| Valine, leucine and isoleucine biosynthesis | map00290 | 8 | <p>ec:2.2.1.6 - synthase,<br/> ec:2.6.1.42 - transaminase,<br/> ec:4.3.1.19 - ammonia-lyase, ec:2.3.3.13 - synthase,<br/> ec:4.2.1.9 - dehydratase,<br/> ec:4.2.1.33 - dehydratase,<br/> ec:1.1.1.86 - reductoisomerase (NADP+),<br/> ec:1.1.1.85 - dehydrogenase</p> | 1, 6, 2, 1, 2, 1, 1, 2 | <p>tri_n_comp26150_c0_seq1, vo_c2_Locus_384_Transcript_2/3_Confidence_0.400_Length_1725, tri_c_comp32679_c0_seq1, vo_c1_Locus_10788_Transcript_1/1_Confidence_0.000_Length_1721, vo_c2_Locus_14969_Transcript_4/8_Confidence_0.750_Length_1231, vo_n2_Locus_3786_Transcript_2/4_Confidence_0.778_Length_1466, vo_n2_Locus_3786_Transcript_3/4_Confidence_0.667_Length_1442, vo_c2_Locus_30746_Transcript_1/1_Confidence_0.000_Length_1279, tri_c_comp34117_c0_seq1, vo_n1_Locus_2267_Transcript_1/1_Confidence_0.000_Length_2010, vo_n1_Locus_12155_Transcript_1/2_Confidence_0.500_Length_2024, vo_n2_Locus_484_Transcript_2/3_Confidence_0.333_Length_2007, vo_n2_Locus_1117_Transcript_16/36_Confidence_0.000_Length_2605, vo_n2_Locus_4139_Transcript_1/1_Confidence_0.000_Length_1669, vo_n1_Locus_6924_Transcript_4/6_Confidence_0.444_Length_1647, vo_n1_Locus_6924_Transcript_3/6_Confidence_0.222_Length_1163</p> |
|---------------------------------------------|----------|---|-----------------------------------------------------------------------------------------------------------------------------------------------------------------------------------------------------------------------------------------------------------------------|------------------------|----------------------------------------------------------------------------------------------------------------------------------------------------------------------------------------------------------------------------------------------------------------------------------------------------------------------------------------------------------------------------------------------------------------------------------------------------------------------------------------------------------------------------------------------------------------------------------------------------------------------------------------------------------------------------------------------------------------------------------------------------------------------------------------------------------------------------------------------------------------------------------------------------------------------------|

|                       |          |   |                                                                                                                                                                                                                                                                                                                                                                                       |                        |                                                                                                                                                                                                                                                                                                                                                                                                                                                                                                                                                                                                                                                                                                                                                                                                                                                                                                                                                                                                                                                                                                                                                                                                                                                                                                                                                                                                            |
|-----------------------|----------|---|---------------------------------------------------------------------------------------------------------------------------------------------------------------------------------------------------------------------------------------------------------------------------------------------------------------------------------------------------------------------------------------|------------------------|------------------------------------------------------------------------------------------------------------------------------------------------------------------------------------------------------------------------------------------------------------------------------------------------------------------------------------------------------------------------------------------------------------------------------------------------------------------------------------------------------------------------------------------------------------------------------------------------------------------------------------------------------------------------------------------------------------------------------------------------------------------------------------------------------------------------------------------------------------------------------------------------------------------------------------------------------------------------------------------------------------------------------------------------------------------------------------------------------------------------------------------------------------------------------------------------------------------------------------------------------------------------------------------------------------------------------------------------------------------------------------------------------------|
| N-Glycan biosynthesis | map00510 | 8 | <p>ec:2.4.1.260 - alpha-1,6-mannosyltransferase, ec:3.2.1.113 - 1,2-alpha-mannosidase, ec:2.4.1.38 - beta-1,4-galactosyltransferase, ec:3.2.1.106 - glucosidase, ec:2.4.1.101 - 2-beta-N-acetylglucosaminyltransferase, ec:2.4.1.144 - 4-beta-N-acetylglucosaminyltransferase, ec:2.4.1.155 - 6-beta-N-acetylglucosaminyltransferase, ec:2.4.99.1 - alpha-(2,6)-sialyltransferase</p> | 1, 8, 2, 2, 3, 3, 2, 6 | <p>tri_n_comp14001_c0_seq2, vo_n2_Locus_3852_Transcript_1/7_Confidence_0.417_Length_4358, tri_n_comp47354_c0_seq1, vo_n1_Locus_9004_Transcript_4/20_Confidence_0.171_Length_2905, vo_c1_Locus_37790_Transcript_1/1_Confidence_0.000_Length_3188, vo_c3_Locus_18796_Transcript_3/3_Confidence_0.000_Length_3826, vo_n1_Locus_24857_Transcript_1/1_Confidence_0.000_Length_2424, vo_c1_Locus_1525_Transcript_2/7_Confidence_0.167_Length_2762, vo_n2_Locus_5268_Transcript_1/2_Confidence_0.917_Length_1282, tri_c_comp20165_c0_seq7, tri_c_comp20165_c0_seq3, tri_n_comp51801_c0_seq1, vo_n3_Locus_2356_Transcript_2/3_Confidence_0.400_Length_7770, vo_c2_Locus_1239_Transcript_4/4_Confidence_0.000_Length_1343, tri_c_comp9226_c0_seq1, vo_n2_Locus_19192_Transcript_2/2_Confidence_0.250_Length_3053, vo_n2_Locus_4116_Transcript_2/13_Confidence_0.441_Length_1694, vo_c3_Locus_4339_Transcript_9/10_Confidence_0.310_Length_1598, vo_c2_Locus_18946_Transcript_11/11_Confidence_0.147_Length_1589, vo_n3_Locus_40148_Transcript_1/1_Confidence_0.000_Length_1773, vo_c3_Locus_14163_Transcript_1/2_Confidence_0.333_Length_2577, vo_n1_Locus_4002_Transcript_6/7_Confidence_0.091_Length_1369, tri_c_comp4119_c0_seq1, vo_n1_Locus_4002_Transcript_4/7_Confidence_0.636_Length_1286, vo_n2_Locus_15072_Transcript_4/7_Confidence_0.286_Length_628, tri_c_comp6583_c0_seq1, tri_n_comp6433_c0_seq1</p> |
|-----------------------|----------|---|---------------------------------------------------------------------------------------------------------------------------------------------------------------------------------------------------------------------------------------------------------------------------------------------------------------------------------------------------------------------------------------|------------------------|------------------------------------------------------------------------------------------------------------------------------------------------------------------------------------------------------------------------------------------------------------------------------------------------------------------------------------------------------------------------------------------------------------------------------------------------------------------------------------------------------------------------------------------------------------------------------------------------------------------------------------------------------------------------------------------------------------------------------------------------------------------------------------------------------------------------------------------------------------------------------------------------------------------------------------------------------------------------------------------------------------------------------------------------------------------------------------------------------------------------------------------------------------------------------------------------------------------------------------------------------------------------------------------------------------------------------------------------------------------------------------------------------------|

|                            |          |   |                                                                                                                                                                                                                                                                                                |                        |                                                                                                                                                                                                                                                                                                                                                                                                                                                                                                                                                                                                                                                                                                                                                                                                                                                                                                                                                                                                                          |
|----------------------------|----------|---|------------------------------------------------------------------------------------------------------------------------------------------------------------------------------------------------------------------------------------------------------------------------------------------------|------------------------|--------------------------------------------------------------------------------------------------------------------------------------------------------------------------------------------------------------------------------------------------------------------------------------------------------------------------------------------------------------------------------------------------------------------------------------------------------------------------------------------------------------------------------------------------------------------------------------------------------------------------------------------------------------------------------------------------------------------------------------------------------------------------------------------------------------------------------------------------------------------------------------------------------------------------------------------------------------------------------------------------------------------------|
| Cyanoamino acid metabolism | map00460 | 8 | <p>ec:6.3.1.1 - ligase,<br/> ec:3.2.1.117 - beta-glucosidase, ec:3.2.1.118 - beta-glucosidase,<br/> ec:3.2.1.21 - gentiobiase,<br/> ec:3.5.1.1 - asparaginase II,<br/> ec:2.1.2.1 - hydroxymethyltransferase,<br/> ec:3.5.5.1 - acetoneitrilase,<br/> ec:2.3.2.2 - glutamyl transpeptidase</p> | 1, 2, 2, 1, 3, 9, 1, 1 | <p>vo_n1_Locus_210_Transcript_2/3_Confidence_0.571_Length_2158, tri_c_comp12867_c0_seq1, tri_n_comp70995_c0_seq1, tri_c_comp12867_c0_seq1, tri_n_comp70995_c0_seq1, vo_c2_Locus_13105_Transcript_1/1_Confidence_0.000_Length_2797, tri_c_comp3336_c0_seq2, tri_n_comp8685_c0_seq2, tri_c_comp3336_c0_seq1, vo_c2_Locus_1465_Transcript_1/1_Confidence_0.000_Length_2684,<br/> vo_n2_Locus_668_Transcript_12/17_Confidence_0.465_Length_3343, vo_n3_Locus_1281_Transcript_13/14_Confidence_0.467_Length_2089,<br/> vo_n2_Locus_668_Transcript_10/17_Confidence_0.419_Length_1865, vo_c3_Locus_6604_Transcript_15/15_Confidence_0.590_Length_1792,<br/> vo_n3_Locus_1281_Transcript_3/14_Confidence_0.533_Length_1904, vo_c3_Locus_6604_Transcript_12/15_Confidence_0.230_Length_1729,<br/> tri_n_comp22443_c0_seq1, vo_c2_Locus_2191_Transcript_14/17_Confidence_0.464_Length_1841,<br/> vo_c2_Locus_31357_Transcript_6/7_Confidence_0.700_Length_1464, vo_n2_Locus_15602_Transcript_2/2_Confidence_0.250_Length_2162</p> |
|----------------------------|----------|---|------------------------------------------------------------------------------------------------------------------------------------------------------------------------------------------------------------------------------------------------------------------------------------------------|------------------------|--------------------------------------------------------------------------------------------------------------------------------------------------------------------------------------------------------------------------------------------------------------------------------------------------------------------------------------------------------------------------------------------------------------------------------------------------------------------------------------------------------------------------------------------------------------------------------------------------------------------------------------------------------------------------------------------------------------------------------------------------------------------------------------------------------------------------------------------------------------------------------------------------------------------------------------------------------------------------------------------------------------------------|

|                          |          |   |                                                                                                                                                                                                                                         |                        |                                                                                                                                                                                                                                                                                                                                                                                                                                                                                                                                                                                                                                                                                                                                                                                                                                                                                                                                                                                                                                                                                                                                                                                                                                                                                                                                                                                                                                                                                                                                                                                                                                                                                                                                                                                        |
|--------------------------|----------|---|-----------------------------------------------------------------------------------------------------------------------------------------------------------------------------------------------------------------------------------------|------------------------|----------------------------------------------------------------------------------------------------------------------------------------------------------------------------------------------------------------------------------------------------------------------------------------------------------------------------------------------------------------------------------------------------------------------------------------------------------------------------------------------------------------------------------------------------------------------------------------------------------------------------------------------------------------------------------------------------------------------------------------------------------------------------------------------------------------------------------------------------------------------------------------------------------------------------------------------------------------------------------------------------------------------------------------------------------------------------------------------------------------------------------------------------------------------------------------------------------------------------------------------------------------------------------------------------------------------------------------------------------------------------------------------------------------------------------------------------------------------------------------------------------------------------------------------------------------------------------------------------------------------------------------------------------------------------------------------------------------------------------------------------------------------------------------|
| Phenylalanine metabolism | map00360 | 8 | ec:2.6.1.1 - transaminase, ec:1.2.1.5 - dehydrogenase [NAD(P)+], ec:1.14.16.1 - 4-monooxygenase, ec:3.5.1.4 - acylamidase, ec:2.1.1.104 - O-methyltransferase, ec:4.2.1.17 - hydratase, ec:5.3.2.1 - tautomerase, ec:1.4.3.21 - oxidase | 4, 2, 8, 3, 2, 7, 3, 1 | vo_n1_Locus_3423_Transcript_2/4_Confidence_0.250_Length_1347, tri_n_comp27683_c0_seq1, vo_c1_Locus_3127_Transcript_1/1_Confidence_0.000_Length_1478, vo_n1_Locus_3423_Transcript_3/4_Confidence_0.250_Length_1416, tri_c_comp55340_c0_seq1, tri_n_comp58061_c0_seq1, vo_c2_Locus_16025_Transcript_2/3_Confidence_0.400_Length_2217, vo_c3_Locus_4625_Transcript_6/11_Confidence_0.650_Length_2945, vo_c2_Locus_12196_Transcript_8/8_Confidence_0.133_Length_3092, vo_n1_Locus_3143_Transcript_9/11_Confidence_0.350_Length_2900, vo_c3_Locus_4625_Transcript_2/11_Confidence_0.350_Length_974, vo_c3_Locus_4625_Transcript_1/11_Confidence_0.350_Length_912, vo_c3_Locus_4625_Transcript_4/11_Confidence_0.650_Length_3056, vo_c3_Locus_4625_Transcript_3/11_Confidence_0.300_Length_1085, vo_c3_Locus_1581_Transcript_3/3_Confidence_0.000_Length_1736, vo_c1_Locus_1298_Transcript_3/6_Confidence_0.625_Length_1775, vo_n2_Locus_157_Transcript_2/4_Confidence_0.286_Length_2059, vo_n2_Locus_30574_Transcript_4/4_Confidence_0.000_Length_969, vo_n2_Locus_30574_Transcript_3/4_Confidence_0.500_Length_827, vo_c2_Locus_2261_Transcript_1/2_Confidence_1.000_Length_2564, vo_c3_Locus_5948_Transcript_1/1_Confidence_0.000_Length_1027, vo_n2_Locus_16945_Transcript_1/3_Confidence_0.500_Length_1084, vo_c3_Locus_9925_Transcript_8/11_Confidence_0.263_Length_3550, vo_n1_Locus_11137_Transcript_5/5_Confidence_0.143_Length_2829, vo_n2_Locus_16945_Transcript_3/3_Confidence_0.000_Length_746, vo_n2_Locus_30747_Transcript_1/1_Confidence_0.000_Length_951, vo_c2_Locus_19107_Transcript_2/4_Confidence_0.571_Length_752, vo_c1_Locus_20614_Transcript_4/6_Confidence_0.273_Length_420, vo_c2_Locus_19107_Transcript_1/4_Confidence_0.571_Length_831, tri_n_comp48625_c0_seq1 |
|--------------------------|----------|---|-----------------------------------------------------------------------------------------------------------------------------------------------------------------------------------------------------------------------------------------|------------------------|----------------------------------------------------------------------------------------------------------------------------------------------------------------------------------------------------------------------------------------------------------------------------------------------------------------------------------------------------------------------------------------------------------------------------------------------------------------------------------------------------------------------------------------------------------------------------------------------------------------------------------------------------------------------------------------------------------------------------------------------------------------------------------------------------------------------------------------------------------------------------------------------------------------------------------------------------------------------------------------------------------------------------------------------------------------------------------------------------------------------------------------------------------------------------------------------------------------------------------------------------------------------------------------------------------------------------------------------------------------------------------------------------------------------------------------------------------------------------------------------------------------------------------------------------------------------------------------------------------------------------------------------------------------------------------------------------------------------------------------------------------------------------------------|

|                     |          |   |                                                                                                                                                                                                                                                           |                         |                                                                                                                                                                                                                                                                                                                                                                                                                                                                                                                                                                                                                                                                                                                                                                                                                                                                                                                                                                                                                                                                                                                                                                                                                                                                                                                                                                                                                                                                                                                                                      |
|---------------------|----------|---|-----------------------------------------------------------------------------------------------------------------------------------------------------------------------------------------------------------------------------------------------------------|-------------------------|------------------------------------------------------------------------------------------------------------------------------------------------------------------------------------------------------------------------------------------------------------------------------------------------------------------------------------------------------------------------------------------------------------------------------------------------------------------------------------------------------------------------------------------------------------------------------------------------------------------------------------------------------------------------------------------------------------------------------------------------------------------------------------------------------------------------------------------------------------------------------------------------------------------------------------------------------------------------------------------------------------------------------------------------------------------------------------------------------------------------------------------------------------------------------------------------------------------------------------------------------------------------------------------------------------------------------------------------------------------------------------------------------------------------------------------------------------------------------------------------------------------------------------------------------|
| Tyrosine metabolism | map00350 | 8 | <p>ec:2.1.1.6 - O-methyltransferase, ec:1.2.1.16 - dehydrogenase [NAD(P)+], ec:2.6.1.1 - transaminase, ec:1.2.1.5 - dehydrogenase [NAD(P)+], ec:1.14.16.2 - 3-monooxygenase, ec:5.3.2.1 - tautomerase, ec:5.3.3.12 - isomerase, ec:1.4.3.21 - oxidase</p> | 12, 1, 4, 2, 2, 3, 3, 1 | <p>vo_c1_Locus_19524_Transcript_9/12_Confidence_0.615_Length_3975, vo_n1_Locus_23463_Transcript_3/4_Confidence_0.286_Length_1512, tri_c_comp32679_c0_seq1, tri_n_comp8749_c0_seq1, vo_c2_Locus_24901_Transcript_2/2_Confidence_0.000_Length_1355, vo_c3_Locus_26293_Transcript_1/4_Confidence_0.750_Length_2211, vo_n2_Locus_17803_Transcript_2/2_Confidence_0.250_Length_2793, tri_n_comp4208_c0_seq2, vo_n2_Locus_17803_Transcript_1/2_Confidence_0.500_Length_2823, vo_n3_Locus_12676_Transcript_1/1_Confidence_0.000_Length_3081, vo_c3_Locus_17106_Transcript_1/2_Confidence_1.000_Length_3041, vo_c3_Locus_26293_Transcript_2/4_Confidence_0.500_Length_2353, vo_c1_Locus_24159_Transcript_1/2_Confidence_0.333_Length_1573, vo_n1_Locus_3423_Transcript_2/4_Confidence_0.250_Length_1347, tri_n_comp27683_c0_seq1, vo_c1_Locus_3127_Transcript_1/1_Confidence_0.000_Length_1478, vo_n1_Locus_3423_Transcript_3/4_Confidence_0.250_Length_1416, tri_c_comp55340_c0_seq1, tri_n_comp58061_c0_seq1, vo_c2_Locus_16025_Transcript_2/3_Confidence_0.400_Length_2217, vo_n2_Locus_6286_Transcript_1/1_Confidence_0.000_Length_1634, vo_c2_Locus_19107_Transcript_2/4_Confidence_0.571_Length_752, vo_c1_Locus_20614_Transcript_4/6_Confidence_0.273_Length_420, vo_c2_Locus_19107_Transcript_1/4_Confidence_0.571_Length_831, vo_c2_Locus_19107_Transcript_2/4_Confidence_0.571_Length_752, vo_c1_Locus_20614_Transcript_4/6_Confidence_0.273_Length_420, vo_c2_Locus_19107_Transcript_1/4_Confidence_0.571_Length_831, tri_n_comp48625_c0_seq1</p> |
|---------------------|----------|---|-----------------------------------------------------------------------------------------------------------------------------------------------------------------------------------------------------------------------------------------------------------|-------------------------|------------------------------------------------------------------------------------------------------------------------------------------------------------------------------------------------------------------------------------------------------------------------------------------------------------------------------------------------------------------------------------------------------------------------------------------------------------------------------------------------------------------------------------------------------------------------------------------------------------------------------------------------------------------------------------------------------------------------------------------------------------------------------------------------------------------------------------------------------------------------------------------------------------------------------------------------------------------------------------------------------------------------------------------------------------------------------------------------------------------------------------------------------------------------------------------------------------------------------------------------------------------------------------------------------------------------------------------------------------------------------------------------------------------------------------------------------------------------------------------------------------------------------------------------------|

|                   |          |   |                                                                                                                                                                                                                                                                |                        |                                                                                                                                                                                                                                                                                                                                                                                                                                                                                                                                                                                                                                                                                                                                                                                                                                                                                                                                                                                                                                                                                                                                                                                                                                                                                                                                                                                                                                                                                    |
|-------------------|----------|---|----------------------------------------------------------------------------------------------------------------------------------------------------------------------------------------------------------------------------------------------------------------|------------------------|------------------------------------------------------------------------------------------------------------------------------------------------------------------------------------------------------------------------------------------------------------------------------------------------------------------------------------------------------------------------------------------------------------------------------------------------------------------------------------------------------------------------------------------------------------------------------------------------------------------------------------------------------------------------------------------------------------------------------------------------------------------------------------------------------------------------------------------------------------------------------------------------------------------------------------------------------------------------------------------------------------------------------------------------------------------------------------------------------------------------------------------------------------------------------------------------------------------------------------------------------------------------------------------------------------------------------------------------------------------------------------------------------------------------------------------------------------------------------------|
| Sulfur metabolism | map00920 | 8 | <p>ec:2.7.1.25 - kinase,<br/> ec:1.8.4.8 - reductase (thioredoxin), ec:2.8.1.1 - sulfurtransferase, ec:2.7.7.4 - adenylyltransferase, ec:1.8.3.1 - oxidase, ec:2.3.1.30 - O-acetyltransferase, ec:2.3.1.46 - O-succinyltransferase, ec:2.5.1.47 - synthase</p> | 2, 3, 4, 7, 1, 4, 1, 5 | <p>vo_c1_Locus_18424_Transcript_2/2_Confidence_0.000_Length_956, vo_c1_Locus_18424_Transcript_1/2_Confidence_0.750_Length_906, tri_n_comp18266_c0_seq1, vo_c1_Locus_18284_Transcript_5/6_Confidence_0.545_Length_1691, tri_n_comp18266_c0_seq3, vo_n1_Locus_10960_Transcript_1/1_Confidence_0.000_Length_634, tri_c_comp17374_c0_seq1, vo_n2_Locus_25172_Transcript_1/1_Confidence_0.000_Length_1849, vo_n1_Locus_21114_Transcript_3/5_Confidence_0.444_Length_1255, vo_n2_Locus_1711_Transcript_9/11_Confidence_0.320_Length_3674, vo_n2_Locus_1711_Transcript_8/11_Confidence_0.360_Length_2026, vo_c2_Locus_2008_Transcript_2/7_Confidence_0.231_Length_3495, vo_c1_Locus_18424_Transcript_1/2_Confidence_0.750_Length_906, tri_n_comp20038_c0_seq1, vo_n2_Locus_1711_Transcript_2/11_Confidence_0.280_Length_4019, vo_c1_Locus_18424_Transcript_2/2_Confidence_0.000_Length_956, tri_c_comp6632_c0_seq1, vo_n1_Locus_9946_Transcript_1/3_Confidence_0.714_Length_1615, vo_c1_Locus_2886_Transcript_6/19_Confidence_0.481_Length_4535, vo_c2_Locus_4812_Transcript_2/3_Confidence_0.625_Length_1578, vo_c2_Locus_4812_Transcript_1/3_Confidence_0.625_Length_1831, vo_n1_Locus_9681_Transcript_11/11_Confidence_0.000_Length_529, vo_c2_Locus_2964_Transcript_1/2_Confidence_0.333_Length_1319, tri_c_comp42317_c0_seq1, vo_n2_Locus_211_Transcript_4/8_Confidence_0.400_Length_1517, vo_c1_Locus_1695_Transcript_1/2_Confidence_0.974_Length_1764, tri_n_comp16677_c0_seq1</p> |
|-------------------|----------|---|----------------------------------------------------------------------------------------------------------------------------------------------------------------------------------------------------------------------------------------------------------------|------------------------|------------------------------------------------------------------------------------------------------------------------------------------------------------------------------------------------------------------------------------------------------------------------------------------------------------------------------------------------------------------------------------------------------------------------------------------------------------------------------------------------------------------------------------------------------------------------------------------------------------------------------------------------------------------------------------------------------------------------------------------------------------------------------------------------------------------------------------------------------------------------------------------------------------------------------------------------------------------------------------------------------------------------------------------------------------------------------------------------------------------------------------------------------------------------------------------------------------------------------------------------------------------------------------------------------------------------------------------------------------------------------------------------------------------------------------------------------------------------------------|



|                     |          |   |                                                                                                                                                                                       |                     |                                                                                                                                                                                                                                                                                                                                                                                                                                                                                                                                                                                                                                                                                                                                                                                                                                                                                                                                                                                                                                                                                                                                                               |
|---------------------|----------|---|---------------------------------------------------------------------------------------------------------------------------------------------------------------------------------------|---------------------|---------------------------------------------------------------------------------------------------------------------------------------------------------------------------------------------------------------------------------------------------------------------------------------------------------------------------------------------------------------------------------------------------------------------------------------------------------------------------------------------------------------------------------------------------------------------------------------------------------------------------------------------------------------------------------------------------------------------------------------------------------------------------------------------------------------------------------------------------------------------------------------------------------------------------------------------------------------------------------------------------------------------------------------------------------------------------------------------------------------------------------------------------------------|
| Lysine biosynthesis | map00300 | 7 | ec:2.6.1.17 - transaminase, ec:4.1.1.20 - decarboxylase, ec:2.7.2.4 - kinase, ec:1.2.1.11 - dehydrogenase, ec:1.17.1.8 - reductase, ec:1.1.1.3 - dehydrogenase, ec:4.3.3.7 - synthase | 1, 2, 7, 4, 3, 1, 1 | vo_c3_Locus_29526_Transcript_7/10_Confidence_0.268_Length_874, tri_c_comp30246_c0_seq1, vo_n1_Locus_454_Transcript_6/7_Confidence_0.364_Length_3522, vo_c1_Locus_1636_Transcript_120/122_Confidence_0.135_Length_3625, tri_n_comp29741_c0_seq1, vo_c3_Locus_31_Transcript_74/79_Confidence_0.124_Length_2769, vo_c2_Locus_10862_Transcript_1/1_Confidence_0.000_Length_1564, vo_c3_Locus_31_Transcript_63/79_Confidence_0.148_Length_3613, vo_c1_Locus_1636_Transcript_116/122_Confidence_0.129_Length_3526, vo_c2_Locus_52_Transcript_164/466_Confidence_0.011_Length_2810, vo_n2_Locus_3068_Transcript_2/3_Confidence_0.250_Length_1991, vo_n1_Locus_4025_Transcript_3/5_Confidence_0.286_Length_3475, vo_c1_Locus_9004_Transcript_2/4_Confidence_0.400_Length_3537, vo_c1_Locus_10440_Transcript_1/2_Confidence_0.667_Length_1569, vo_n1_Locus_32462_Transcript_1/1_Confidence_0.000_Length_1047, vo_n2_Locus_24260_Transcript_2/3_Confidence_0.250_Length_976, vo_c1_Locus_22485_Transcript_1/2_Confidence_0.500_Length_1035, vo_c2_Locus_10862_Transcript_1/1_Confidence_0.000_Length_1564, vo_c3_Locus_7185_Transcript_2/3_Confidence_0.333_Length_1661 |
|---------------------|----------|---|---------------------------------------------------------------------------------------------------------------------------------------------------------------------------------------|---------------------|---------------------------------------------------------------------------------------------------------------------------------------------------------------------------------------------------------------------------------------------------------------------------------------------------------------------------------------------------------------------------------------------------------------------------------------------------------------------------------------------------------------------------------------------------------------------------------------------------------------------------------------------------------------------------------------------------------------------------------------------------------------------------------------------------------------------------------------------------------------------------------------------------------------------------------------------------------------------------------------------------------------------------------------------------------------------------------------------------------------------------------------------------------------|

|                          |          |   |                                                                                                                                                                                                                                                 |                       |                                                                                                                                                                                                                                                                                                                                                                                                                                                                                                                                                                                                                                                                                                                                                                                                                                                                                                                                                                                                                                                                                                                                                                                                                                                                                                                                                                                                                                                                                                                                                                                                                                                                                                                                                                                                                                                                                                                                                                                                                                                                                                                                                                                                                                                                                                                                                                                                                                                                                                   |
|--------------------------|----------|---|-------------------------------------------------------------------------------------------------------------------------------------------------------------------------------------------------------------------------------------------------|-----------------------|---------------------------------------------------------------------------------------------------------------------------------------------------------------------------------------------------------------------------------------------------------------------------------------------------------------------------------------------------------------------------------------------------------------------------------------------------------------------------------------------------------------------------------------------------------------------------------------------------------------------------------------------------------------------------------------------------------------------------------------------------------------------------------------------------------------------------------------------------------------------------------------------------------------------------------------------------------------------------------------------------------------------------------------------------------------------------------------------------------------------------------------------------------------------------------------------------------------------------------------------------------------------------------------------------------------------------------------------------------------------------------------------------------------------------------------------------------------------------------------------------------------------------------------------------------------------------------------------------------------------------------------------------------------------------------------------------------------------------------------------------------------------------------------------------------------------------------------------------------------------------------------------------------------------------------------------------------------------------------------------------------------------------------------------------------------------------------------------------------------------------------------------------------------------------------------------------------------------------------------------------------------------------------------------------------------------------------------------------------------------------------------------------------------------------------------------------------------------------------------------------|
| Other glycan degradation | map00511 | 7 | ec:3.2.1.45 - psychosine hydrolase, ec:3.2.1.52 - hexosaminidase, ec:3.5.1.26 - aspartylglucosylamine deaspartylase, ec:3.2.1.24 - alpha-D-mannosidase, ec:3.2.1.25 - mannanase, ec:3.2.1.23 - lactase (ambiguous), ec:3.2.1.18 - neuraminidase | 4, 13, 1, 6, 2, 6, 16 | tri_n_comp56355_c0_seq1, vo_n2_Locus_20092_Transcript_5/7_Confidence_0.636_Length_1860, vo_c3_Locus_14755_Transcript_5/5_Confidence_0.000_Length_1578, vo_n2_Locus_20092_Transcript_2/7_Confidence_0.364_Length_599, vo_c3_Locus_25279_Transcript_1/3_Confidence_0.500_Length_3460, tri_c_comp15706_c0_seq2, vo_n2_Locus_4554_Transcript_3/4_Confidence_0.444_Length_2253, vo_n2_Locus_3_Transcript_18735/24291_Confidence_0.000_Length_2121, vo_n2_Locus_4395_Transcript_3/3_Confidence_0.167_Length_2032, vo_c2_Locus_6406_Transcript_1/4_Confidence_0.333_Length_1666, vo_n1_Locus_14758_Transcript_1/2_Confidence_0.667_Length_1933, tri_n_comp35667_c0_seq1, vo_n2_Locus_4395_Transcript_1/3_Confidence_0.667_Length_1925, tri_c_comp32936_c0_seq1, tri_n_comp92955_c0_seq1, tri_n_comp30287_c0_seq1, vo_n2_Locus_4554_Transcript_4/4_Confidence_0.111_Length_2049, tri_n_comp8685_c0_seq2, vo_c1_Locus_28869_Transcript_6/6_Confidence_0.250_Length_506, vo_c1_Locus_28869_Transcript_4/6_Confidence_0.375_Length_1328, vo_c3_Locus_25165_Transcript_1/1_Confidence_0.000_Length_1760, vo_n2_Locus_19192_Transcript_2/2_Confidence_0.250_Length_3053, vo_c3_Locus_4662_Transcript_1/1_Confidence_0.000_Length_3632, tri_c_comp9226_c0_seq1, tri_c_comp12867_c0_seq1, tri_n_comp70995_c0_seq1, tri_c_comp12867_c0_seq1, vo_n2_Locus_1748_Transcript_2/3_Confidence_0.333_Length_4221, tri_n_comp70995_c0_seq1, vo_c2_Locus_26351_Transcript_1/2_Confidence_0.500_Length_4013, vo_c3_Locus_8047_Transcript_1/2_Confidence_0.333_Length_4021, vo_c3_Locus_32079_Transcript_2/2_Confidence_0.250_Length_2113, vo_c3_Locus_31_Transcript_21/79_Confidence_0.028_Length_1439, tri_n_comp18659_c0_seq1, vo_c3_Locus_9066_Transcript_2/6_Confidence_0.500_Length_1163, vo_c1_Locus_32359_Transcript_2/2_Confidence_0.000_Length_1561, vo_n3_Locus_1645_Transcript_4/7_Confidence_0.417_Length_2558, vo_c2_Locus_4429_Transcript_8/10_Confidence_0.385_Length_2463, tri_c_comp55333_c0_seq1, vo_n1_Locus_15621_Transcript_2/2_Confidence_0.000_Length_1596, vo_n3_Locus_21759_Transcript_2/5_Confidence_0.143_Length_653, vo_c2_Locus_4429_Transcript_7/10_Confidence_0.538_Length_2541, vo_n2_Locus_26415_Transcript_1/1_Confidence_0.000_Length_1376, vo_c2_Locus_6498_Transcript_10/10_Confidence_0.158_Length_1599, tri_n_comp15822_c0_seq1, vo_c1_Locus_27062_Transcript_5/7_Confidence_0.538_Length_1304, tri_n_comp15822_c0_seq2, vo_c3_Locus_9066_Transcript_1/6_Confidence_0.375_Length_846 |
|--------------------------|----------|---|-------------------------------------------------------------------------------------------------------------------------------------------------------------------------------------------------------------------------------------------------|-----------------------|---------------------------------------------------------------------------------------------------------------------------------------------------------------------------------------------------------------------------------------------------------------------------------------------------------------------------------------------------------------------------------------------------------------------------------------------------------------------------------------------------------------------------------------------------------------------------------------------------------------------------------------------------------------------------------------------------------------------------------------------------------------------------------------------------------------------------------------------------------------------------------------------------------------------------------------------------------------------------------------------------------------------------------------------------------------------------------------------------------------------------------------------------------------------------------------------------------------------------------------------------------------------------------------------------------------------------------------------------------------------------------------------------------------------------------------------------------------------------------------------------------------------------------------------------------------------------------------------------------------------------------------------------------------------------------------------------------------------------------------------------------------------------------------------------------------------------------------------------------------------------------------------------------------------------------------------------------------------------------------------------------------------------------------------------------------------------------------------------------------------------------------------------------------------------------------------------------------------------------------------------------------------------------------------------------------------------------------------------------------------------------------------------------------------------------------------------------------------------------------------------|

|                             |          |   |                                                                                                                                                            |                       |                                                                                                                                                                                                                                                                                                                                                                                                                                                                                                                                                                                                                                                                                                                                                                                                                                                                                                                                                                                                                                                                                                                                                                                                                                                                                                                                                                                                                                                                                                                                                                                                                                                                                                                                                                                                                                                                                                                                                                                                                                                                                                                                                                                                                                                                                                                                                                                                                                                                                                                                                                                                                                                                                                                                                                                                                                                                                                                                                                                                                                                                                                                                                                                                                                                                                                                                                                                                                                                                                                                                                                                                                                                                                                                                                                                                                                                                                                                                                                                                                                                                                                                                                                                                                                                                                                                                                                                                                                                                                                                                                                                                                                                                                                                                                                                                                                                                                                                                                   |
|-----------------------------|----------|---|------------------------------------------------------------------------------------------------------------------------------------------------------------|-----------------------|---------------------------------------------------------------------------------------------------------------------------------------------------------------------------------------------------------------------------------------------------------------------------------------------------------------------------------------------------------------------------------------------------------------------------------------------------------------------------------------------------------------------------------------------------------------------------------------------------------------------------------------------------------------------------------------------------------------------------------------------------------------------------------------------------------------------------------------------------------------------------------------------------------------------------------------------------------------------------------------------------------------------------------------------------------------------------------------------------------------------------------------------------------------------------------------------------------------------------------------------------------------------------------------------------------------------------------------------------------------------------------------------------------------------------------------------------------------------------------------------------------------------------------------------------------------------------------------------------------------------------------------------------------------------------------------------------------------------------------------------------------------------------------------------------------------------------------------------------------------------------------------------------------------------------------------------------------------------------------------------------------------------------------------------------------------------------------------------------------------------------------------------------------------------------------------------------------------------------------------------------------------------------------------------------------------------------------------------------------------------------------------------------------------------------------------------------------------------------------------------------------------------------------------------------------------------------------------------------------------------------------------------------------------------------------------------------------------------------------------------------------------------------------------------------------------------------------------------------------------------------------------------------------------------------------------------------------------------------------------------------------------------------------------------------------------------------------------------------------------------------------------------------------------------------------------------------------------------------------------------------------------------------------------------------------------------------------------------------------------------------------------------------------------------------------------------------------------------------------------------------------------------------------------------------------------------------------------------------------------------------------------------------------------------------------------------------------------------------------------------------------------------------------------------------------------------------------------------------------------------------------------------------------------------------------------------------------------------------------------------------------------------------------------------------------------------------------------------------------------------------------------------------------------------------------------------------------------------------------------------------------------------------------------------------------------------------------------------------------------------------------------------------------------------------------------------------------------------------------------------------------------------------------------------------------------------------------------------------------------------------------------------------------------------------------------------------------------------------------------------------------------------------------------------------------------------------------------------------------------------------------------------------------------------------------------------------|
| Arachidonic acid metabolism | map00590 | 7 | ec:3.1.1.4 - A2, ec:5.3.99.3 - synthase, ec:5.3.99.2 - peroxidase, ec:3.3.2.10 - epoxide hydrolase, ec:1.14.15.3 - 1-monooxygenase, ec:3.3.2.6 - hydrolase | 59, 2, 1, 13, 3, 1, 3 | vo_n2_Locus_311_Transcript_71/114_Confidence_0.150_Length_1045, vo_c3_Locus_7729_Transcript_4/5_Confidence_0.167_Length_5654, vo_n1_Locus_443_Transcript_30/53_Confidence_0.193_Length_928, vo_c1_Locus_430_Transcript_20/51_Confidence_0.291_Length_976, vo_c2_Locus_601_Transcript_31/36_Confidence_0.229_Length_1002, vo_c2_Locus_5092_Transcript_6/14_Confidence_0.476_Length_1090, vo_c3_Locus_1328_Transcript_24/26_Confidence_0.245_Length_1398, vo_n2_Locus_311_Transcript_78/114_Confidence_0.093_Length_844, vo_c3_Locus_1273_Transcript_51/57_Confidence_0.108_Length_895, vo_c1_Locus_21671_Transcript_6/49_Confidence_0.021_Length_1919, vo_c3_Locus_1273_Transcript_50/57_Confidence_0.144_Length_1471, vo_n1_Locus_443_Transcript_24/53_Confidence_0.109_Length_905, vo_n2_Locus_311_Transcript_87/114_Confidence_0.061_Length_2919, vo_n3_Locus_407_Transcript_22/43_Confidence_0.292_Length_1222, tri_n_comp10070_c0_seq2, tri_c_comp22021_c0_seq1, vo_n1_Locus_443_Transcript_32/53_Confidence_0.252_Length_1164, vo_n3_Locus_407_Transcript_32/43_Confidence_0.283_Length_1271, vo_n1_Locus_443_Transcript_10/53_Confidence_0.193_Length_1076, vo_n3_Locus_407_Transcript_7/43_Confidence_0.132_Length_1778, vo_n2_Locus_311_Transcript_109/114_Confidence_0.117_Length_1018, vo_n3_Locus_407_Transcript_39/43_Confidence_0.236_Length_1222, vo_c3_Locus_15467_Transcript_2/2_Confidence_0.000_Length_1100, vo_n1_Locus_4880_Transcript_2/6_Confidence_0.333_Length_883, vo_n2_Locus_3013_Transcript_1/2_Confidence_0.750_Length_964, vo_n2_Locus_311_Transcript_112/114_Confidence_0.146_Length_1678, vo_c2_Locus_601_Transcript_27/36_Confidence_0.337_Length_991, vo_c2_Locus_601_Transcript_2/36_Confidence_0.133_Length_1744, vo_n1_Locus_443_Transcript_39/53_Confidence_0.210_Length_1938, vo_c3_Locus_15467_Transcript_1/2_Confidence_0.750_Length_988, vo_c1_Locus_430_Transcript_11/51_Confidence_0.145_Length_955, vo_c2_Locus_5092_Transcript_10/14_Confidence_0.429_Length_1495, vo_n2_Locus_21867_Transcript_2/5_Confidence_0.200_Length_5139, tri_n_comp20432_c0_seq6, vo_n2_Locus_311_Transcript_84/114_Confidence_0.117_Length_1124, vo_n2_Locus_311_Transcript_77/114_Confidence_0.134_Length_997, vo_n2_Locus_311_Transcript_90/114_Confidence_0.061_Length_1016, vo_c2_Locus_601_Transcript_11/36_Confidence_0.289_Length_1016, tri_n_comp20432_c0_seq2, vo_c1_Locus_430_Transcript_48/51_Confidence_0.227_Length_968, vo_n1_Locus_443_Transcript_17/53_Confidence_0.168_Length_1009, tri_c_comp8925_c1_seq1, vo_c2_Locus_601_Transcript_18/36_Confidence_0.265_Length_801, vo_c3_Locus_1273_Transcript_17/57_Confidence_0.050_Length_1126, vo_n3_Locus_407_Transcript_40/43_Confidence_0.217_Length_1200, vo_c2_Locus_601_Transcript_36/36_Confidence_0.217_Length_953, vo_n3_Locus_407_Transcript_8/43_Confidence_0.189_Length_1800, vo_c3_Locus_1273_Transcript_16/57_Confidence_0.079_Length_1101, tri_n_comp20662_c0_seq7, vo_n2_Locus_23060_Transcript_2/2_Confidence_0.000_Length_889, vo_c2_Locus_601_Transcript_15/36_Confidence_0.337_Length_815, vo_n1_Locus_4880_Transcript_4/6_Confidence_0.333_Length_1109, vo_n2_Locus_311_Transcript_3/114_Confidence_0.142_Length_866, tri_c_comp20860_c0_seq2, vo_n1_Locus_443_Transcript_8/53_Confidence_0.261_Length_1031, vo_n1_Locus_443_Transcript_49/53_Confidence_0.134_Length_862, vo_n3_Locus_407_Transcript_14/43_Confidence_0.142_Length_872, vo_c2_Locus_5609_Transcript_4/4_Confidence_0.250_Length_1105, vo_c3_Locus_17900_Transcript_1/1_Confidence_0.000_Length_966, vo_c1_Locus_29164_Transcript_1/1_Confidence_0.000_Length_750, vo_c3_Locus_19248_Transcript_2/2_Confidence_0.000_Length_845, vo_c2_Locus_8227_Transcript_3/3_Confidence_0.143_Length_1106, vo_n2_Locus_1609_Transcript_3/3_Confidence_0.000_Length_489, vo_n3_Locus_21278_Transcript_2/2_Confidence_0.250_Length_899, vo_c3_Locus_7729_Transcript_4/5_Confidence_0.167_Length_5654, vo_c1_Locus_15275_Transcript_1/2_Confidence_0.333_Length_968, vo_n2_Locus_23060_Transcript_2/2_Confidence_0.000_Length_889, vo_n1_Locus_4880_Transcript_4/6_Confidence_0.333_Length_1109, vo_n1_Locus_4880_Transcript_2/6_Confidence_0.333_Length_883, vo_n2_Locus_3013_Transcript_1/2_Confidence_0.750_Length_964, vo_n2_Locus_34681_Transcript_5/6_Confidence_0.077_Length_2256, vo_c3_Locus_26080_Transcript_2/2_Confidence_0.250_Length_928, vo_c2_Locus_5609_Transcript_4/4_Confidence_0.250_Length_1105, vo_c3_Locus_17900_Transcript_1/1_Confidence_0.000_Length_966, tri_c_comp22021_c0_seq1, vo_n2_Locus_16627_Transcript_1/2_Confidence_0.333_Length_2167, vo_n2_Locus_13706_Transcript_2/3_Confidence_0.750_Length_2463, tri_n_comp17047_c0_seq1, vo_n2_Locus_2042_Transcript_5/7_Confidence_0.231_Length_2650, vo_n2_Locus_16627_Transcript_1/2_Confidence_0.333_Length_2167, vo_n2_Locus_13706_Transcript_2/3_Confidence_0.750_Length_2463, tri_n_comp17047_c0_seq1 |
|-----------------------------|----------|---|------------------------------------------------------------------------------------------------------------------------------------------------------------|-----------------------|---------------------------------------------------------------------------------------------------------------------------------------------------------------------------------------------------------------------------------------------------------------------------------------------------------------------------------------------------------------------------------------------------------------------------------------------------------------------------------------------------------------------------------------------------------------------------------------------------------------------------------------------------------------------------------------------------------------------------------------------------------------------------------------------------------------------------------------------------------------------------------------------------------------------------------------------------------------------------------------------------------------------------------------------------------------------------------------------------------------------------------------------------------------------------------------------------------------------------------------------------------------------------------------------------------------------------------------------------------------------------------------------------------------------------------------------------------------------------------------------------------------------------------------------------------------------------------------------------------------------------------------------------------------------------------------------------------------------------------------------------------------------------------------------------------------------------------------------------------------------------------------------------------------------------------------------------------------------------------------------------------------------------------------------------------------------------------------------------------------------------------------------------------------------------------------------------------------------------------------------------------------------------------------------------------------------------------------------------------------------------------------------------------------------------------------------------------------------------------------------------------------------------------------------------------------------------------------------------------------------------------------------------------------------------------------------------------------------------------------------------------------------------------------------------------------------------------------------------------------------------------------------------------------------------------------------------------------------------------------------------------------------------------------------------------------------------------------------------------------------------------------------------------------------------------------------------------------------------------------------------------------------------------------------------------------------------------------------------------------------------------------------------------------------------------------------------------------------------------------------------------------------------------------------------------------------------------------------------------------------------------------------------------------------------------------------------------------------------------------------------------------------------------------------------------------------------------------------------------------------------------------------------------------------------------------------------------------------------------------------------------------------------------------------------------------------------------------------------------------------------------------------------------------------------------------------------------------------------------------------------------------------------------------------------------------------------------------------------------------------------------------------------------------------------------------------------------------------------------------------------------------------------------------------------------------------------------------------------------------------------------------------------------------------------------------------------------------------------------------------------------------------------------------------------------------------------------------------------------------------------------------------------------------------------------------------------|

|                           |          |   |                                                                                                                                                                       |                       |                                                                                                                                                                                                                                                                                                                                                                                                                                                                                                                                                                                                                                                                                                                                                                                                                                                                                                                                                                                                                                                                                                                                                                                                                                                                                                                                                                                                                                                                                                                                                                                                                                                                                                                                                                                                                                                                                                                                                                                                                                                                                                                                                                                                                                                                                                                                                                                                                                                                                                                                                                                                                                                                                                                                                                                                                                                                                                                                                                                                                                                                                                                                                                                                                                                                                                                                                                                                                                                                                                                                                                                                                                                                                                                                                                                                                                                                                                                                                                                                                                                                                                                                                                                                                                                                                                                                                                                                                                                                                                                                                                                                                                                                                                                                                                                                                                                                                                                                                                                                                                                                                                                                                                                                                                                                                                                                                                                                                                                                                                                                                                                                                                                                                                                                                                                                                                                                                                                                                  |
|---------------------------|----------|---|-----------------------------------------------------------------------------------------------------------------------------------------------------------------------|-----------------------|--------------------------------------------------------------------------------------------------------------------------------------------------------------------------------------------------------------------------------------------------------------------------------------------------------------------------------------------------------------------------------------------------------------------------------------------------------------------------------------------------------------------------------------------------------------------------------------------------------------------------------------------------------------------------------------------------------------------------------------------------------------------------------------------------------------------------------------------------------------------------------------------------------------------------------------------------------------------------------------------------------------------------------------------------------------------------------------------------------------------------------------------------------------------------------------------------------------------------------------------------------------------------------------------------------------------------------------------------------------------------------------------------------------------------------------------------------------------------------------------------------------------------------------------------------------------------------------------------------------------------------------------------------------------------------------------------------------------------------------------------------------------------------------------------------------------------------------------------------------------------------------------------------------------------------------------------------------------------------------------------------------------------------------------------------------------------------------------------------------------------------------------------------------------------------------------------------------------------------------------------------------------------------------------------------------------------------------------------------------------------------------------------------------------------------------------------------------------------------------------------------------------------------------------------------------------------------------------------------------------------------------------------------------------------------------------------------------------------------------------------------------------------------------------------------------------------------------------------------------------------------------------------------------------------------------------------------------------------------------------------------------------------------------------------------------------------------------------------------------------------------------------------------------------------------------------------------------------------------------------------------------------------------------------------------------------------------------------------------------------------------------------------------------------------------------------------------------------------------------------------------------------------------------------------------------------------------------------------------------------------------------------------------------------------------------------------------------------------------------------------------------------------------------------------------------------------------------------------------------------------------------------------------------------------------------------------------------------------------------------------------------------------------------------------------------------------------------------------------------------------------------------------------------------------------------------------------------------------------------------------------------------------------------------------------------------------------------------------------------------------------------------------------------------------------------------------------------------------------------------------------------------------------------------------------------------------------------------------------------------------------------------------------------------------------------------------------------------------------------------------------------------------------------------------------------------------------------------------------------------------------------------------------------------------------------------------------------------------------------------------------------------------------------------------------------------------------------------------------------------------------------------------------------------------------------------------------------------------------------------------------------------------------------------------------------------------------------------------------------------------------------------------------------------------------------------------------------------------------------------------------------------------------------------------------------------------------------------------------------------------------------------------------------------------------------------------------------------------------------------------------------------------------------------------------------------------------------------------------------------------------------------------------------------------------------------------|
| Oxidative phosphorylation | map00190 | 6 | ec:1.3.5.1 - dehydrogenase, ec:1.6.5.3 - reductase (H+-translocating), ec:3.6.1.1 - diphosphatase, ec:3.6.3.6 - ATPase, ec:1.9.3.1 - oxidase, ec:1.10.2.2 - reductase | 11, 1, 14, 13, 46, 12 | vo_n2_Locus_5500_Transcript_5/5_Confidence_0.308_Length_1268, vo_n2_Locus_5500_Transcript_1/5_Confidence_0.308_Length_1100, tri_n_comp12494_c0_seq1, vo_n2_Locus_5500_Transcript_2/5_Confidence_0.538_Length_1312, vo_n2_Locus_2182_Transcript_14/15_Confidence_0.458_Length_3129, vo_c2_Locus_642_Transcript_3/10_Confidence_0.571_Length_2141, vo_n1_Locus_1508_Transcript_4/6_Confidence_0.429_Length_1979, vo_n1_Locus_2259_Transcript_6/13_Confidence_0.429_Length_1275, vo_n1_Locus_2259_Transcript_9/13_Confidence_0.429_Length_1314, vo_c1_Locus_1462_Transcript_1/46_Confidence_0.182_Length_2129, vo_c1_Locus_1462_Transcript_8/46_Confidence_0.530_Length_9104, vo_n2_Locus_23058_Transcript_1/1_Confidence_0.000_Length_1342, vo_c2_Locus_1991_Transcript_1/9_Confidence_0.600_Length_1677, vo_c3_Locus_3320_Transcript_8/9_Confidence_0.450_Length_1918, vo_n2_Locus_3669_Transcript_6/9_Confidence_0.435_Length_642, vo_c3_Locus_3320_Transcript_6/9_Confidence_0.500_Length_1804, vo_n2_Locus_32920_Transcript_1/1_Confidence_0.000_Length_2385, vo_n1_Locus_12055_Transcript_5/12_Confidence_0.625_Length_1802, vo_c3_Locus_3661_Transcript_4/5_Confidence_0.444_Length_2325, vo_c1_Locus_5507_Transcript_1/1_Confidence_0.000_Length_1113, vo_c2_Locus_1991_Transcript_5/9_Confidence_0.600_Length_1783, vo_c2_Locus_6867_Transcript_3/4_Confidence_0.300_Length_472, vo_c2_Locus_2212_Transcript_3/4_Confidence_0.200_Length_1331, vo_n2_Locus_3669_Transcript_4/9_Confidence_0.565_Length_1692, vo_c3_Locus_7550_Transcript_2/2_Confidence_0.400_Length_1056, vo_n2_Locus_6371_Transcript_4/4_Confidence_0.000_Length_406, vo_c1_Locus_13640_Transcript_1/2_Confidence_0.972_Length_1746, vo_n2_Locus_3198_Transcript_13/13_Confidence_0.143_Length_3969, vo_c3_Locus_641_Transcript_2/3_Confidence_0.429_Length_2783, vo_n3_Locus_1906_Transcript_2/7_Confidence_0.389_Length_1663, vo_n2_Locus_7343_Transcript_2/5_Confidence_0.643_Length_1116, vo_n1_Locus_1052_Transcript_9/9_Confidence_0.150_Length_3323, vo_n2_Locus_3198_Transcript_7/13_Confidence_0.190_Length_1940, vo_c3_Locus_107_Transcript_2/2_Confidence_0.000_Length_1878, vo_n1_Locus_7271_Transcript_6/6_Confidence_0.500_Length_537, vo_n3_Locus_1906_Transcript_3/7_Confidence_0.389_Length_1640, vo_n2_Locus_3198_Transcript_4/13_Confidence_0.238_Length_2112, vo_c2_Locus_302_Transcript_1/1_Confidence_0.000_Length_1951, vo_n2_Locus_7343_Transcript_5/5_Confidence_0.286_Length_1183, vo_c1_Locus_350_Transcript_36/56_Confidence_0.031_Length_6073, vo_c3_Locus_350_Transcript_43/136_Confidence_0.013_Length_1090, vo_n3_Locus_2887_Transcript_17/89_Confidence_0.041_Length_2118, vo_n3_Locus_2887_Transcript_30/89_Confidence_0.038_Length_6215, vo_n2_Locus_2705_Transcript_77/102_Confidence_0.064_Length_11206, vo_c2_Locus_37_Transcript_240/305_Confidence_0.010_Length_5136, vo_c3_Locus_350_Transcript_53/136_Confidence_0.031_Length_2764, vo_n3_Locus_2887_Transcript_24/89_Confidence_0.014_Length_1665, tri_c_comp13429_c0_seq1, vo_c1_Locus_350_Transcript_28/56_Confidence_0.078_Length_10184, tri_c_comp20501_c0_seq96, vo_c3_Locus_350_Transcript_54/136_Confidence_0.013_Length_3833, vo_n2_Locus_2705_Transcript_52/102_Confidence_0.074_Length_11694, vo_c2_Locus_37_Transcript_265/305_Confidence_0.009_Length_4896, vo_c3_Locus_350_Transcript_72/136_Confidence_0.031_Length_2399, vo_c1_Locus_350_Transcript_41/56_Confidence_0.109_Length_7323, vo_c2_Locus_37_Transcript_244/305_Confidence_0.002_Length_3468, vo_n1_Locus_1328_Transcript_28/54_Confidence_0.026_Length_9460, vo_c2_Locus_37_Transcript_236/305_Confidence_0.014_Length_12025, vo_n3_Locus_2887_Transcript_89/89_Confidence_0.010_Length_4322, vo_c3_Locus_350_Transcript_52/136_Confidence_0.020_Length_3668, vo_n1_Locus_31781_Transcript_2/2_Confidence_0.000_Length_1482, vo_n1_Locus_6231_Transcript_1/1_Confidence_0.000_Length_808, vo_c2_Locus_37_Transcript_263/305_Confidence_0.010_Length_12853, vo_c1_Locus_350_Transcript_47/56_Confidence_0.146_Length_15341, vo_c2_Locus_7731_Transcript_1/1_Confidence_0.000_Length_894, tri_c_comp20501_c0_seq80, vo_n1_Locus_1328_Transcript_38/54_Confidence_0.020_Length_7735, vo_c1_Locus_350_Transcript_43/56_Confidence_0.109_Length_8257, tri_c_comp20501_c0_seq3, tri_n_comp20283_c1_seq60, vo_c1_Locus_20327_Transcript_1/1_Confidence_0.000_Length_657, tri_c_comp20501_c0_seq62, vo_n3_Locus_2887_Transcript_61/89_Confidence_0.097_Length_7484, tri_n_comp22502_c0_seq1, vo_n2_Locus_2705_Transcript_76/102_Confidence_0.092_Length_12161, tri_c_comp20501_c0_seq44, vo_n2_Locus_2705_Transcript_61/102_Confidence_0.131_Length_21257, vo_n3_Locus_2887_Transcript_22/89_Confidence_0.038_Length_3086, tri_c_comp20501_c0_seq26, vo_n1_Locus_1328_Transcript_44/54_Confidence_0.141_Length_7799, vo_c2_Locus_12863_Transcript_1/5_Confidence_0.500_Length_540, vo_c1_Locus_350_Transcript_34/56_Confidence_0.109_Length_14994, vo_c2_Locus_37_Transcript_268/305_Confidence_0.011_Length_8430, vo_n2_Locus_881_Transcript_1/1_Confidence_0.000_Length_815, vo_n2_Locus_6766_Transcript_4/5_Confidence_0.286_Length_587, vo_c2_Locus_5878_Transcript_5/7_Confidence_0.333_Length_1049, vo_c1_Locus_754_Transcript_8/11_Confidence_0.200_Length_971, vo_c1_Locus_754_Transcript_9/11_Confidence_0.200_Length_2339, vo_c1_Locus_8997_Transcript_2/2_Confidence_0.000_Length_877, vo_c3_Locus_6650_Transcript_4/8_Confidence_0.308_Length_1102, vo_c1_Locus_754_Transcript_5/11_Confidence_0.300_Length_1714, vo_c2_Locus_5878_Transcript_3/7_Confidence_0.444_Length_1038, vo_n1_Locus_1379_Transcript_7/9_Confidence_0.154_Length_925, vo_c2_Locus_455_Transcript_3/3_Confidence_0.000_Length_684, vo_n3_Locus_3061_Transcript_4/7_Confidence_0.417_Length_922, vo_n2_Locus_3484_Transcript_2/9_Confidence_0.333_Length_887, vo_c1_Locus_754_Transcript_7/11_Confidence_0.250_Length_1706 |
|---------------------------|----------|---|-----------------------------------------------------------------------------------------------------------------------------------------------------------------------|-----------------------|--------------------------------------------------------------------------------------------------------------------------------------------------------------------------------------------------------------------------------------------------------------------------------------------------------------------------------------------------------------------------------------------------------------------------------------------------------------------------------------------------------------------------------------------------------------------------------------------------------------------------------------------------------------------------------------------------------------------------------------------------------------------------------------------------------------------------------------------------------------------------------------------------------------------------------------------------------------------------------------------------------------------------------------------------------------------------------------------------------------------------------------------------------------------------------------------------------------------------------------------------------------------------------------------------------------------------------------------------------------------------------------------------------------------------------------------------------------------------------------------------------------------------------------------------------------------------------------------------------------------------------------------------------------------------------------------------------------------------------------------------------------------------------------------------------------------------------------------------------------------------------------------------------------------------------------------------------------------------------------------------------------------------------------------------------------------------------------------------------------------------------------------------------------------------------------------------------------------------------------------------------------------------------------------------------------------------------------------------------------------------------------------------------------------------------------------------------------------------------------------------------------------------------------------------------------------------------------------------------------------------------------------------------------------------------------------------------------------------------------------------------------------------------------------------------------------------------------------------------------------------------------------------------------------------------------------------------------------------------------------------------------------------------------------------------------------------------------------------------------------------------------------------------------------------------------------------------------------------------------------------------------------------------------------------------------------------------------------------------------------------------------------------------------------------------------------------------------------------------------------------------------------------------------------------------------------------------------------------------------------------------------------------------------------------------------------------------------------------------------------------------------------------------------------------------------------------------------------------------------------------------------------------------------------------------------------------------------------------------------------------------------------------------------------------------------------------------------------------------------------------------------------------------------------------------------------------------------------------------------------------------------------------------------------------------------------------------------------------------------------------------------------------------------------------------------------------------------------------------------------------------------------------------------------------------------------------------------------------------------------------------------------------------------------------------------------------------------------------------------------------------------------------------------------------------------------------------------------------------------------------------------------------------------------------------------------------------------------------------------------------------------------------------------------------------------------------------------------------------------------------------------------------------------------------------------------------------------------------------------------------------------------------------------------------------------------------------------------------------------------------------------------------------------------------------------------------------------------------------------------------------------------------------------------------------------------------------------------------------------------------------------------------------------------------------------------------------------------------------------------------------------------------------------------------------------------------------------------------------------------------------------------------------------------------------------------------|

|                                      |          |   |                                                                                                                                                                                                                                                  |                     |                                                                                                                                                                                                                                                                                                                                                                                                                                                                                                                                                                                                                                                                                                                                                                                                                                                                                                                                                                                                                                                                                                                                                                                  |
|--------------------------------------|----------|---|--------------------------------------------------------------------------------------------------------------------------------------------------------------------------------------------------------------------------------------------------|---------------------|----------------------------------------------------------------------------------------------------------------------------------------------------------------------------------------------------------------------------------------------------------------------------------------------------------------------------------------------------------------------------------------------------------------------------------------------------------------------------------------------------------------------------------------------------------------------------------------------------------------------------------------------------------------------------------------------------------------------------------------------------------------------------------------------------------------------------------------------------------------------------------------------------------------------------------------------------------------------------------------------------------------------------------------------------------------------------------------------------------------------------------------------------------------------------------|
| Streptomy<br>cin<br>biosynthe<br>sis | map00521 | 6 | ec:1.1.1.133 - reductase,<br>ec:5.1.3.13 - 3,5-epimerase,<br>ec:2.7.1.2 - glucokinase<br>(phosphorylating),<br>ec:3.1.3.25 - phosphatase,<br>ec:4.2.1.46 - 4,6-<br>dehydratase, ec:5.4.2.2 -<br>(alpha-D-glucose-1,6-<br>bisphosphate-dependent) | 2, 1, 2, 5,<br>2, 7 | vo_c2_Locus_1643_Transcript_1/1_Confidence_0.000_Length_1756, vo_c1_Locus_3806_Transcript_1/1_Confidence_0.000_Length_1482,<br>vo_c2_Locus_1643_Transcript_1/1_Confidence_0.000_Length_1756, tri_c_comp10536_c0_seq1,<br>vo_c2_Locus_32726_Transcript_2/2_Confidence_0.000_Length_696, vo_n2_Locus_24510_Transcript_1/1_Confidence_0.000_Length_1024,<br>vo_c2_Locus_24561_Transcript_2/2_Confidence_0.000_Length_1596, vo_c2_Locus_24561_Transcript_1/2_Confidence_0.750_Length_1539,<br>vo_c1_Locus_21354_Transcript_1/6_Confidence_0.600_Length_1404, vo_c2_Locus_13210_Transcript_4/4_Confidence_0.125_Length_1454,<br>vo_c2_Locus_5377_Transcript_5/9_Confidence_0.150_Length_2142, vo_n1_Locus_5366_Transcript_4/4_Confidence_0.556_Length_1623,<br>tri_n_comp18813_c0_seq13, vo_c2_Locus_23037_Transcript_2/2_Confidence_0.000_Length_2109,<br>vo_n3_Locus_362_Transcript_3/4_Confidence_0.364_Length_3895, vo_n3_Locus_362_Transcript_1/4_Confidence_0.727_Length_3306,<br>vo_n1_Locus_5208_Transcript_2/2_Confidence_0.000_Length_2077, vo_c2_Locus_23037_Transcript_1/2_Confidence_0.750_Length_1965,<br>vo_n3_Locus_15336_Transcript_1/1_Confidence_0.000_Length_1810 |
|--------------------------------------|----------|---|--------------------------------------------------------------------------------------------------------------------------------------------------------------------------------------------------------------------------------------------------|---------------------|----------------------------------------------------------------------------------------------------------------------------------------------------------------------------------------------------------------------------------------------------------------------------------------------------------------------------------------------------------------------------------------------------------------------------------------------------------------------------------------------------------------------------------------------------------------------------------------------------------------------------------------------------------------------------------------------------------------------------------------------------------------------------------------------------------------------------------------------------------------------------------------------------------------------------------------------------------------------------------------------------------------------------------------------------------------------------------------------------------------------------------------------------------------------------------|

|                        |          |   |                                                                                                                                                         |                     |                                                                                                                                                                                                                                                                                                                                                                                                                                                                                                                                                                                                                                                                                                                                                                                                                                                                                                                                                                                                                                                                                                                                                                                                                                                                                                                                                                                                                                                                                                                                                                                                                                                                                                                                                                                                                                                                                                                                                                                                                                                                                                                                                                                                                                                                                                                                                                                                                                                                                                                                                                                                                                                                                                                                                                                                                                                                                                                                                                                                                                                                                                                                                                                                                                                                                                                                                                                                                                                                                                                                                                                                                                                                                                                                                                                                                                                                                                                                                                                                                                                                                                                                                                                                                                                                                                                                                                                                                                                                                                                                                                                                                                                                                                                                                                                                                                                                                                                                                                                                                                                                                                                                                                                                                                                                                                                                                                                                                                                                                                                                                                                                                                                                                                                                                                                                                                                                                                                                                                                                                                                                                                                                                                                                                                             |
|------------------------|----------|---|---------------------------------------------------------------------------------------------------------------------------------------------------------|---------------------|---------------------------------------------------------------------------------------------------------------------------------------------------------------------------------------------------------------------------------------------------------------------------------------------------------------------------------------------------------------------------------------------------------------------------------------------------------------------------------------------------------------------------------------------------------------------------------------------------------------------------------------------------------------------------------------------------------------------------------------------------------------------------------------------------------------------------------------------------------------------------------------------------------------------------------------------------------------------------------------------------------------------------------------------------------------------------------------------------------------------------------------------------------------------------------------------------------------------------------------------------------------------------------------------------------------------------------------------------------------------------------------------------------------------------------------------------------------------------------------------------------------------------------------------------------------------------------------------------------------------------------------------------------------------------------------------------------------------------------------------------------------------------------------------------------------------------------------------------------------------------------------------------------------------------------------------------------------------------------------------------------------------------------------------------------------------------------------------------------------------------------------------------------------------------------------------------------------------------------------------------------------------------------------------------------------------------------------------------------------------------------------------------------------------------------------------------------------------------------------------------------------------------------------------------------------------------------------------------------------------------------------------------------------------------------------------------------------------------------------------------------------------------------------------------------------------------------------------------------------------------------------------------------------------------------------------------------------------------------------------------------------------------------------------------------------------------------------------------------------------------------------------------------------------------------------------------------------------------------------------------------------------------------------------------------------------------------------------------------------------------------------------------------------------------------------------------------------------------------------------------------------------------------------------------------------------------------------------------------------------------------------------------------------------------------------------------------------------------------------------------------------------------------------------------------------------------------------------------------------------------------------------------------------------------------------------------------------------------------------------------------------------------------------------------------------------------------------------------------------------------------------------------------------------------------------------------------------------------------------------------------------------------------------------------------------------------------------------------------------------------------------------------------------------------------------------------------------------------------------------------------------------------------------------------------------------------------------------------------------------------------------------------------------------------------------------------------------------------------------------------------------------------------------------------------------------------------------------------------------------------------------------------------------------------------------------------------------------------------------------------------------------------------------------------------------------------------------------------------------------------------------------------------------------------------------------------------------------------------------------------------------------------------------------------------------------------------------------------------------------------------------------------------------------------------------------------------------------------------------------------------------------------------------------------------------------------------------------------------------------------------------------------------------------------------------------------------------------------------------------------------------------------------------------------------------------------------------------------------------------------------------------------------------------------------------------------------------------------------------------------------------------------------------------------------------------------------------------------------------------------------------------------------------------------------------------------------------------------------------------|
| Ether lipid metabolism | map00565 | 6 | ec:2.7.8.2 - cholinephosphotransferase, ec:2.5.1.26 - synthase, ec:3.1.1.4 - A2, ec:3.1.1.47 - esterase, ec:2.8.2.11 - sulfotransferase, ec:3.1.4.4 - D | 1, 2, 59, 4, 31, 13 | <p>vo_n2_Locus_32954_Transcript_1/2_Confidence_0.333_Length_1192, vo_c2_Locus_6733_Transcript_3/6_Confidence_0.364_Length_7025, tri_n_comp39945_c0_seq1, vo_n2_Locus_311_Transcript_71/114_Confidence_0.150_Length_1045, vo_c3_Locus_7729_Transcript_4/5_Confidence_0.167_Length_5654, vo_n1_Locus_443_Transcript_30/53_Confidence_0.193_Length_928, vo_c1_Locus_430_Transcript_20/51_Confidence_0.291_Length_976, vo_c2_Locus_601_Transcript_31/36_Confidence_0.229_Length_1002, vo_c2_Locus_5092_Transcript_6/14_Confidence_0.476_Length_1090, vo_c3_Locus_1328_Transcript_24/26_Confidence_0.245_Length_1398, vo_n2_Locus_311_Transcript_78/114_Confidence_0.093_Length_844, vo_c3_Locus_1273_Transcript_51/57_Confidence_0.108_Length_895, vo_c1_Locus_21671_Transcript_6/49_Confidence_0.021_Length_1919, vo_c3_Locus_1273_Transcript_50/57_Confidence_0.144_Length_1471, vo_n1_Locus_443_Transcript_24/53_Confidence_0.109_Length_905, vo_n2_Locus_311_Transcript_87/114_Confidence_0.061_Length_2919, vo_n3_Locus_407_Transcript_22/43_Confidence_0.292_Length_1222, tri_n_comp10070_c0_seq2, tri_c_comp22021_c0_seq1, vo_n1_Locus_443_Transcript_32/53_Confidence_0.252_Length_1164, vo_n3_Locus_407_Transcript_32/43_Confidence_0.283_Length_1271, vo_n1_Locus_443_Transcript_10/53_Confidence_0.193_Length_1076, vo_n3_Locus_407_Transcript_7/43_Confidence_0.132_Length_1778, vo_n2_Locus_311_Transcript_109/114_Confidence_0.117_Length_1018, vo_n3_Locus_407_Transcript_39/43_Confidence_0.236_Length_1222, vo_c3_Locus_15467_Transcript_2/2_Confidence_0.000_Length_1100, vo_n1_Locus_4880_Transcript_2/6_Confidence_0.333_Length_883, vo_n2_Locus_3013_Transcript_1/2_Confidence_0.750_Length_964, vo_n2_Locus_311_Transcript_112/114_Confidence_0.146_Length_1678, vo_c2_Locus_601_Transcript_27/36_Confidence_0.337_Length_991, vo_c2_Locus_601_Transcript_2/36_Confidence_0.133_Length_1744, vo_n1_Locus_443_Transcript_39/53_Confidence_0.210_Length_1938, vo_c3_Locus_15467_Transcript_1/2_Confidence_0.750_Length_988, vo_c1_Locus_430_Transcript_11/51_Confidence_0.145_Length_955, vo_c2_Locus_5092_Transcript_10/14_Confidence_0.429_Length_1495, vo_n2_Locus_21867_Transcript_2/5_Confidence_0.200_Length_5139, tri_n_comp20432_c0_seq6, vo_n2_Locus_311_Transcript_84/114_Confidence_0.117_Length_1124, vo_n2_Locus_311_Transcript_77/114_Confidence_0.134_Length_997, vo_n2_Locus_311_Transcript_90/114_Confidence_0.061_Length_1016, vo_c2_Locus_601_Transcript_11/36_Confidence_0.289_Length_1016, tri_n_comp20432_c0_seq2, vo_c1_Locus_430_Transcript_48/51_Confidence_0.227_Length_968, vo_n1_Locus_443_Transcript_17/53_Confidence_0.168_Length_1009, tri_c_comp8925_c1_seq1, vo_c2_Locus_601_Transcript_18/36_Confidence_0.265_Length_801, vo_c3_Locus_1273_Transcript_17/57_Confidence_0.050_Length_1126, vo_n3_Locus_407_Transcript_40/43_Confidence_0.217_Length_1200, vo_c2_Locus_601_Transcript_36/36_Confidence_0.217_Length_953, vo_n3_Locus_407_Transcript_8/43_Confidence_0.189_Length_1800, vo_c3_Locus_1273_Transcript_16/57_Confidence_0.079_Length_1101, tri_n_comp20662_c0_seq7, vo_n2_Locus_23060_Transcript_2/2_Confidence_0.000_Length_889, vo_c2_Locus_601_Transcript_15/36_Confidence_0.337_Length_815, vo_n1_Locus_4880_Transcript_4/6_Confidence_0.333_Length_1109, vo_n2_Locus_311_Transcript_3/114_Confidence_0.142_Length_866, tri_c_comp20860_c0_seq2, vo_n1_Locus_443_Transcript_8/53_Confidence_0.261_Length_1031, vo_n1_Locus_443_Transcript_49/53_Confidence_0.134_Length_862, vo_n3_Locus_407_Transcript_14/43_Confidence_0.142_Length_872, vo_c2_Locus_5609_Transcript_4/4_Confidence_0.250_Length_1105, vo_c3_Locus_17900_Transcript_1/1_Confidence_0.000_Length_966, tri_c_comp3336_c0_seq2, tri_n_comp26298_c0_seq1, tri_c_comp9493_c0_seq1, tri_c_comp3336_c0_seq1, vo_c2_Locus_11068_Transcript_7/15_Confidence_0.088_Length_2478, tri_c_comp19434_c0_seq20, vo_n3_Locus_427_Transcript_152/175_Confidence_0.022_Length_1587, vo_n2_Locus_39296_Transcript_1/14_Confidence_0.615_Length_1447, vo_n1_Locus_1282_Transcript_21/28_Confidence_0.267_Length_1443, vo_c3_Locus_12992_Transcript_17/18_Confidence_0.438_Length_1753, vo_c3_Locus_10470_Transcript_2/7_Confidence_0.500_Length_1430, tri_c_comp18408_c0_seq3, vo_c3_Locus_15517_Transcript_3/3_Confidence_0.500_Length_1506, vo_c1_Locus_2146_Transcript_6/28_Confidence_0.438_Length_1427, tri_c_comp10922_c0_seq1, vo_n1_Locus_1282_Transcript_25/28_Confidence_0.250_Length_1445, vo_n1_Locus_1282_Transcript_18/28_Confidence_0.350_Length_1518, vo_c3_Locus_12992_Transcript_1/18_Confidence_0.562_Length_1707, vo_n1_Locus_1282_Transcript_20/28_Confidence_0.250_Length_1445, vo_n3_Locus_23180_Transcript_1/1_Confidence_0.000_Length_1372, vo_c3_Locus_12992_Transcript_2/18_Confidence_0.438_Length_1659, vo_n2_Locus_3_Transcript_18204/24291_Confidence_0.000_Length_1558, vo_c3_Locus_12992_Transcript_13/18_Confidence_0.562_Length_1789, vo_c3_Locus_15917_Transcript_1/2_Confidence_0.667_Length_1528, vo_c3_Locus_6108_Transcript_1/20_Confidence_0.667_Length_1501, vo_n2_Locus_1168_Transcript_12/19_Confidence_0.567_Length_1720, vo_c1_Locus_29045_Transcript_1/2_Confidence_0.600_Length_1495, vo_c3_Locus_12992_Transcript_14/18_Confidence_0.719_Length_1813, vo_c2_Locus_2351_Transcript_10/22_Confidence_0.081_Length_950, vo_c3_Locus_16912_Transcript_3/4_Confidence_0.500_Length_1461, vo_c2_Locus_557_Transcript_42/127_Confidence_0.063_Length_2107, vo_n1_Locus_1282_Transcript_28/28_Confidence_0.133_Length_1479, vo_c3_Locus_21516_Transcript_2/3_Confidence_0.333_Length_2294, vo_n2_Locus_4388_Transcript_1/1_Confidence_0.000_Length_1497, tri_n_comp20471_c0_seq2, vo_c1_Locus_947_Transcript_1/7_Confidence_0.286_Length_2009, vo_c3_Locus_6042_Transcript_5/5_Confidence_0.300_Length_3385, vo_c3_Locus_4758_Transcript_1/1_Confidence_0.000_Length_1881, tri_n_comp25890_c0_seq1, tri_c_comp20356_c0_seq35, tri_c_comp20356_c0_seq10, tri_c_comp20356_c0_seq21, vo_n2_Locus_6470_Transcript_5/10_Confidence_0.333_Length_2772, tri_c_comp20356_c0_seq29, tri_c_comp20356_c0_seq27, tri_c_comp20356_c0_seq25, tri_c_comp20356_c0_seq36, tri_c_comp20356_c0_seq47</p> |
|------------------------|----------|---|---------------------------------------------------------------------------------------------------------------------------------------------------------|---------------------|---------------------------------------------------------------------------------------------------------------------------------------------------------------------------------------------------------------------------------------------------------------------------------------------------------------------------------------------------------------------------------------------------------------------------------------------------------------------------------------------------------------------------------------------------------------------------------------------------------------------------------------------------------------------------------------------------------------------------------------------------------------------------------------------------------------------------------------------------------------------------------------------------------------------------------------------------------------------------------------------------------------------------------------------------------------------------------------------------------------------------------------------------------------------------------------------------------------------------------------------------------------------------------------------------------------------------------------------------------------------------------------------------------------------------------------------------------------------------------------------------------------------------------------------------------------------------------------------------------------------------------------------------------------------------------------------------------------------------------------------------------------------------------------------------------------------------------------------------------------------------------------------------------------------------------------------------------------------------------------------------------------------------------------------------------------------------------------------------------------------------------------------------------------------------------------------------------------------------------------------------------------------------------------------------------------------------------------------------------------------------------------------------------------------------------------------------------------------------------------------------------------------------------------------------------------------------------------------------------------------------------------------------------------------------------------------------------------------------------------------------------------------------------------------------------------------------------------------------------------------------------------------------------------------------------------------------------------------------------------------------------------------------------------------------------------------------------------------------------------------------------------------------------------------------------------------------------------------------------------------------------------------------------------------------------------------------------------------------------------------------------------------------------------------------------------------------------------------------------------------------------------------------------------------------------------------------------------------------------------------------------------------------------------------------------------------------------------------------------------------------------------------------------------------------------------------------------------------------------------------------------------------------------------------------------------------------------------------------------------------------------------------------------------------------------------------------------------------------------------------------------------------------------------------------------------------------------------------------------------------------------------------------------------------------------------------------------------------------------------------------------------------------------------------------------------------------------------------------------------------------------------------------------------------------------------------------------------------------------------------------------------------------------------------------------------------------------------------------------------------------------------------------------------------------------------------------------------------------------------------------------------------------------------------------------------------------------------------------------------------------------------------------------------------------------------------------------------------------------------------------------------------------------------------------------------------------------------------------------------------------------------------------------------------------------------------------------------------------------------------------------------------------------------------------------------------------------------------------------------------------------------------------------------------------------------------------------------------------------------------------------------------------------------------------------------------------------------------------------------------------------------------------------------------------------------------------------------------------------------------------------------------------------------------------------------------------------------------------------------------------------------------------------------------------------------------------------------------------------------------------------------------------------------------------------------------------------------------------------------------|

|                         |          |   |                                                                                                                                  |               |                                                                                                                                                                                                                                                                                                                                                                                                                                                                                                                                                                                                                                                                                                                                                                                                                                                                                                                                                                                                                                                                                                                                                                                                                                                                                                                                                           |
|-------------------------|----------|---|----------------------------------------------------------------------------------------------------------------------------------|---------------|-----------------------------------------------------------------------------------------------------------------------------------------------------------------------------------------------------------------------------------------------------------------------------------------------------------------------------------------------------------------------------------------------------------------------------------------------------------------------------------------------------------------------------------------------------------------------------------------------------------------------------------------------------------------------------------------------------------------------------------------------------------------------------------------------------------------------------------------------------------------------------------------------------------------------------------------------------------------------------------------------------------------------------------------------------------------------------------------------------------------------------------------------------------------------------------------------------------------------------------------------------------------------------------------------------------------------------------------------------------|
| Monobactam biosynthesis | map00261 | 5 | ec:2.7.2.4 - kinase, ec:1.2.1.11 - dehydrogenase, ec:1.17.1.8 - reductase, ec:4.3.3.7 - synthase, ec:2.7.7.4 - adenyltransferase | 7, 4, 3, 1, 7 | vo_c1_Locus_1636_Transcript_120/122_Confidence_0.135_Length_3625, tri_n_comp29741_c0_seq1, vo_c3_Locus_31_Transcript_74/79_Confidence_0.124_Length_2769, vo_c2_Locus_10862_Transcript_1/1_Confidence_0.000_Length_1564, vo_c3_Locus_31_Transcript_63/79_Confidence_0.148_Length_3613, vo_c1_Locus_1636_Transcript_116/122_Confidence_0.129_Length_3526, vo_c2_Locus_52_Transcript_164/466_Confidence_0.011_Length_2810, vo_n2_Locus_3068_Transcript_2/3_Confidence_0.250_Length_1991, vo_n1_Locus_4025_Transcript_3/5_Confidence_0.286_Length_3475, vo_c1_Locus_9004_Transcript_2/4_Confidence_0.400_Length_3537, vo_c1_Locus_10440_Transcript_1/2_Confidence_0.667_Length_1569, vo_n1_Locus_32462_Transcript_1/1_Confidence_0.000_Length_1047, vo_n2_Locus_24260_Transcript_2/3_Confidence_0.250_Length_976, vo_c1_Locus_22485_Transcript_1/2_Confidence_0.500_Length_1035, vo_c3_Locus_7185_Transcript_2/3_Confidence_0.333_Length_1661, vo_n2_Locus_1711_Transcript_9/11_Confidence_0.320_Length_3674, vo_n2_Locus_1711_Transcript_8/11_Confidence_0.360_Length_2026, vo_c2_Locus_2008_Transcript_2/7_Confidence_0.231_Length_3495, vo_c1_Locus_18424_Transcript_1/2_Confidence_0.750_Length_906, tri_n_comp20038_c0_seq1, vo_n2_Locus_1711_Transcript_2/11_Confidence_0.280_Length_4019, vo_c1_Locus_18424_Transcript_2/2_Confidence_0.000_Length_956 |
|-------------------------|----------|---|----------------------------------------------------------------------------------------------------------------------------------|---------------|-----------------------------------------------------------------------------------------------------------------------------------------------------------------------------------------------------------------------------------------------------------------------------------------------------------------------------------------------------------------------------------------------------------------------------------------------------------------------------------------------------------------------------------------------------------------------------------------------------------------------------------------------------------------------------------------------------------------------------------------------------------------------------------------------------------------------------------------------------------------------------------------------------------------------------------------------------------------------------------------------------------------------------------------------------------------------------------------------------------------------------------------------------------------------------------------------------------------------------------------------------------------------------------------------------------------------------------------------------------|

|                                      |          |   |                                                                                                                                                                                 |               |                                                                                                                                                                                                                                                                                                                                                                                                                                                                                                                                                                                                                                                   |
|--------------------------------------|----------|---|---------------------------------------------------------------------------------------------------------------------------------------------------------------------------------|---------------|---------------------------------------------------------------------------------------------------------------------------------------------------------------------------------------------------------------------------------------------------------------------------------------------------------------------------------------------------------------------------------------------------------------------------------------------------------------------------------------------------------------------------------------------------------------------------------------------------------------------------------------------------|
| Phosphate and phosphinate metabolism | map00440 | 5 | ec:2.6.1.37 - transaminase,<br>ec:2.7.8.2 - cholinephosphotransferase,<br>ec:3.11.1.2 - hydrolase,<br>ec:2.7.7.14 - cytidylyltransferase,<br>ec:2.7.7.15 - cytidylyltransferase | 1, 1, 1, 3, 4 | vo_c2_Locus_11195_Transcript_1/1_Confidence_0.000_Length_1464, vo_n2_Locus_32954_Transcript_1/2_Confidence_0.333_Length_1192, vo_c2_Locus_8193_Transcript_6/7_Confidence_0.091_Length_1909, vo_c3_Locus_19662_Transcript_1/2_Confidence_0.833_Length_5009, vo_c3_Locus_1617_Transcript_6/6_Confidence_0.222_Length_1645, vo_n1_Locus_16053_Transcript_1/1_Confidence_0.000_Length_1438, vo_c3_Locus_19662_Transcript_1/2_Confidence_0.833_Length_5009, vo_c3_Locus_1617_Transcript_6/6_Confidence_0.222_Length_1645, vo_n1_Locus_16053_Transcript_1/1_Confidence_0.000_Length_1438, vo_n1_Locus_29872_Transcript_1/1_Confidence_0.000_Length_1764 |
|--------------------------------------|----------|---|---------------------------------------------------------------------------------------------------------------------------------------------------------------------------------|---------------|---------------------------------------------------------------------------------------------------------------------------------------------------------------------------------------------------------------------------------------------------------------------------------------------------------------------------------------------------------------------------------------------------------------------------------------------------------------------------------------------------------------------------------------------------------------------------------------------------------------------------------------------------|



|                                           |          |   |                                                                                                                                                                                                                 |                      |                                                                                                                                                                                                                                                                                                                                                                                                                                                                                                                                                                                                                                                                                                                                                                                                                                                                                                                                                                                                                                                                                                                                                                                                                                                                                                                                                                                                                                                                                                                                                                                                                                                                                                                                                                                                                                                                                                                                                                                                                                                                                                                                                                                                                                                                                                                                                                                                                                                                                                                                                                                                                                                                                                                                                                                                                                                                                                          |
|-------------------------------------------|----------|---|-----------------------------------------------------------------------------------------------------------------------------------------------------------------------------------------------------------------|----------------------|----------------------------------------------------------------------------------------------------------------------------------------------------------------------------------------------------------------------------------------------------------------------------------------------------------------------------------------------------------------------------------------------------------------------------------------------------------------------------------------------------------------------------------------------------------------------------------------------------------------------------------------------------------------------------------------------------------------------------------------------------------------------------------------------------------------------------------------------------------------------------------------------------------------------------------------------------------------------------------------------------------------------------------------------------------------------------------------------------------------------------------------------------------------------------------------------------------------------------------------------------------------------------------------------------------------------------------------------------------------------------------------------------------------------------------------------------------------------------------------------------------------------------------------------------------------------------------------------------------------------------------------------------------------------------------------------------------------------------------------------------------------------------------------------------------------------------------------------------------------------------------------------------------------------------------------------------------------------------------------------------------------------------------------------------------------------------------------------------------------------------------------------------------------------------------------------------------------------------------------------------------------------------------------------------------------------------------------------------------------------------------------------------------------------------------------------------------------------------------------------------------------------------------------------------------------------------------------------------------------------------------------------------------------------------------------------------------------------------------------------------------------------------------------------------------------------------------------------------------------------------------------------------------|
| Drug<br>metabolis<br>m - other<br>enzymes | map00983 | 5 | ec:2.7.1.48 - kinase,<br>ec:6.3.5.2 - synthase<br>(glutamine-hydrolysing),<br>ec:2.4.1.17 - 1-naphthol<br>glucuronyltransferase,<br>ec:1.1.1.205 -<br>dehydrogenase, ec:2.4.2.10<br>- phosphoribosyltransferase | 10, 11, 13,<br>12, 1 | vo_n1_Locus_27053_Transcript_1/1_Confidence_0.333_Length_1866, vo_n2_Locus_1685_Transcript_1/2_Confidence_0.667_Length_854,<br>vo_n1_Locus_1829_Transcript_14/31_Confidence_0.635_Length_1771, vo_n1_Locus_1829_Transcript_24/31_Confidence_0.558_Length_1469,<br>vo_c3_Locus_527_Transcript_60/87_Confidence_0.092_Length_2707, vo_n1_Locus_1829_Transcript_21/31_Confidence_0.519_Length_1458,<br>vo_c1_Locus_12423_Transcript_2/2_Confidence_0.333_Length_980, vo_n2_Locus_26604_Transcript_1/2_Confidence_0.750_Length_1361,<br>vo_n1_Locus_1829_Transcript_31/31_Confidence_0.269_Length_1123, vo_n2_Locus_26604_Transcript_2/2_Confidence_0.000_Length_1685,<br>vo_n1_Locus_9681_Transcript_4/11_Confidence_0.529_Length_1748, vo_n2_Locus_215_Transcript_14/28_Confidence_0.182_Length_1973,<br>vo_n3_Locus_2366_Transcript_13/24_Confidence_0.236_Length_1948, vo_n1_Locus_9681_Transcript_6/11_Confidence_0.353_Length_1721,<br>vo_n2_Locus_215_Transcript_12/28_Confidence_0.212_Length_2644, vo_n1_Locus_9681_Transcript_11/11_Confidence_0.000_Length_529,<br>vo_n1_Locus_9681_Transcript_5/11_Confidence_0.529_Length_1790, vo_n2_Locus_215_Transcript_22/28_Confidence_0.197_Length_2480,<br>vo_n2_Locus_215_Transcript_8/28_Confidence_0.227_Length_2670, vo_c1_Locus_1789_Transcript_29/32_Confidence_0.300_Length_3220,<br>vo_n1_Locus_6239_Transcript_3/19_Confidence_0.425_Length_1997, tri_c_comp6209_c0_seq1,<br>vo_c1_Locus_26340_Transcript_5/9_Confidence_0.600_Length_1699, tri_n_comp65990_c0_seq1,<br>vo_n1_Locus_13372_Transcript_1/2_Confidence_0.333_Length_1687, vo_n2_Locus_34154_Transcript_3/3_Confidence_0.000_Length_2043,<br>vo_n2_Locus_668_Transcript_17/17_Confidence_0.070_Length_2403, tri_c_comp58135_c0_seq1,<br>vo_c3_Locus_16093_Transcript_1/1_Confidence_0.000_Length_1750, vo_n1_Locus_13372_Transcript_2/2_Confidence_0.000_Length_1314,<br>vo_c2_Locus_24841_Transcript_3/3_Confidence_0.167_Length_3241, vo_n2_Locus_4774_Transcript_1/1_Confidence_0.000_Length_884,<br>vo_c1_Locus_35615_Transcript_1/1_Confidence_0.000_Length_2075, vo_n1_Locus_15639_Transcript_1/1_Confidence_0.000_Length_1086,<br>vo_n2_Locus_21654_Transcript_1/2_Confidence_0.333_Length_1437, tri_n_comp20442_c0_seq2,<br>vo_c1_Locus_4865_Transcript_8/17_Confidence_0.303_Length_1948, vo_n1_Locus_1854_Transcript_11/16_Confidence_0.294_Length_1888,<br>tri_c_comp31112_c0_seq1, tri_n_comp29350_c0_seq1, vo_n1_Locus_1854_Transcript_12/16_Confidence_0.324_Length_2352,<br>vo_n1_Locus_4507_Transcript_1/1_Confidence_0.000_Length_2067, vo_c2_Locus_673_Transcript_7/13_Confidence_0.438_Length_2095,<br>vo_n3_Locus_24688_Transcript_1/2_Confidence_1.000_Length_1616, vo_c2_Locus_673_Transcript_6/13_Confidence_0.375_Length_2722,<br>vo_c2_Locus_940_Transcript_2/3_Confidence_0.136_Length_2144, vo_c1_Locus_6671_Transcript_2/2_Confidence_0.000_Length_1815 |
|-------------------------------------------|----------|---|-----------------------------------------------------------------------------------------------------------------------------------------------------------------------------------------------------------------|----------------------|----------------------------------------------------------------------------------------------------------------------------------------------------------------------------------------------------------------------------------------------------------------------------------------------------------------------------------------------------------------------------------------------------------------------------------------------------------------------------------------------------------------------------------------------------------------------------------------------------------------------------------------------------------------------------------------------------------------------------------------------------------------------------------------------------------------------------------------------------------------------------------------------------------------------------------------------------------------------------------------------------------------------------------------------------------------------------------------------------------------------------------------------------------------------------------------------------------------------------------------------------------------------------------------------------------------------------------------------------------------------------------------------------------------------------------------------------------------------------------------------------------------------------------------------------------------------------------------------------------------------------------------------------------------------------------------------------------------------------------------------------------------------------------------------------------------------------------------------------------------------------------------------------------------------------------------------------------------------------------------------------------------------------------------------------------------------------------------------------------------------------------------------------------------------------------------------------------------------------------------------------------------------------------------------------------------------------------------------------------------------------------------------------------------------------------------------------------------------------------------------------------------------------------------------------------------------------------------------------------------------------------------------------------------------------------------------------------------------------------------------------------------------------------------------------------------------------------------------------------------------------------------------------------|

|                          |          |   |                                                                                                                                         |               |                                                                                                                                                                                                                                                                                                                                                                                                                                                                                                                                                                                                                                                                                  |
|--------------------------|----------|---|-----------------------------------------------------------------------------------------------------------------------------------------|---------------|----------------------------------------------------------------------------------------------------------------------------------------------------------------------------------------------------------------------------------------------------------------------------------------------------------------------------------------------------------------------------------------------------------------------------------------------------------------------------------------------------------------------------------------------------------------------------------------------------------------------------------------------------------------------------------|
| Biotin<br>metabolis<br>m | map00780 | 5 | ec:1.1.1.100 - reductase,<br>ec:4.2.1.59 - dehydratase,<br>ec:6.3.4.15 - ligase,<br>ec:2.3.1.41 - synthase I,<br>ec:2.3.1.47 - synthase | 4, 1, 2, 3, 1 | vo_n3_Locus_484_Transcript_6/12_Confidence_0.250_Length_1533, vo_c2_Locus_12502_Transcript_2/2_Confidence_0.000_Length_781,<br>vo_n3_Locus_484_Transcript_5/12_Confidence_0.250_Length_1451, vo_c2_Locus_2193_Transcript_1/3_Confidence_0.667_Length_1218,<br>vo_c1_Locus_4631_Transcript_1/1_Confidence_0.000_Length_1088, vo_c3_Locus_9194_Transcript_2/3_Confidence_0.667_Length_1368,<br>vo_c1_Locus_1719_Transcript_3/3_Confidence_0.000_Length_1383, vo_c3_Locus_422_Transcript_1/3_Confidence_0.857_Length_2914,<br>vo_n1_Locus_8253_Transcript_1/1_Confidence_0.000_Length_1430, vo_n2_Locus_4712_Transcript_1/2_Confidence_0.333_Length_1867,<br>tri_n_comp5199_c0_seq1 |
|--------------------------|----------|---|-----------------------------------------------------------------------------------------------------------------------------------------|---------------|----------------------------------------------------------------------------------------------------------------------------------------------------------------------------------------------------------------------------------------------------------------------------------------------------------------------------------------------------------------------------------------------------------------------------------------------------------------------------------------------------------------------------------------------------------------------------------------------------------------------------------------------------------------------------------|

|                       |          |   |                                                                                                                                |                 |                                                                                                                                                                                                                                                                                                                                                                                                                                                                                                                                                                                                                                                                                                                                                                                                                                                                                                                                                                                                                                                                                                                                                                                                                                                                                                                                                                                                                                                                                                                                                                                                                                                                                                                                                                                                                                                                                                                                                                                                                                                                                                                                                                                                                                                                                                                                                                                                                                                                                                                   |
|-----------------------|----------|---|--------------------------------------------------------------------------------------------------------------------------------|-----------------|-------------------------------------------------------------------------------------------------------------------------------------------------------------------------------------------------------------------------------------------------------------------------------------------------------------------------------------------------------------------------------------------------------------------------------------------------------------------------------------------------------------------------------------------------------------------------------------------------------------------------------------------------------------------------------------------------------------------------------------------------------------------------------------------------------------------------------------------------------------------------------------------------------------------------------------------------------------------------------------------------------------------------------------------------------------------------------------------------------------------------------------------------------------------------------------------------------------------------------------------------------------------------------------------------------------------------------------------------------------------------------------------------------------------------------------------------------------------------------------------------------------------------------------------------------------------------------------------------------------------------------------------------------------------------------------------------------------------------------------------------------------------------------------------------------------------------------------------------------------------------------------------------------------------------------------------------------------------------------------------------------------------------------------------------------------------------------------------------------------------------------------------------------------------------------------------------------------------------------------------------------------------------------------------------------------------------------------------------------------------------------------------------------------------------------------------------------------------------------------------------------------------|
| Fatty acid elongation | map00062 | 5 | ec:3.1.2.22 - hydrolase, ec:4.2.1.74 - hydratase, ec:3.1.2.2 - hydrolase, ec:4.2.1.17 - hydratase, ec:1.1.1.35 - dehydrogenase | 4, 11, 2, 7, 16 | vo_n2_Locus_3_Transcript_9963/24291_Confidence_0.000_Length_1392, vo_c1_Locus_18266_Transcript_15/25_Confidence_0.047_Length_1151, vo_c3_Locus_13218_Transcript_2/2_Confidence_0.333_Length_1246, vo_c2_Locus_22217_Transcript_1/2_Confidence_0.667_Length_1279, vo_c2_Locus_2261_Transcript_1/2_Confidence_1.000_Length_2564, vo_n1_Locus_9414_Transcript_8/13_Confidence_0.167_Length_606, vo_c3_Locus_9925_Transcript_8/11_Confidence_0.263_Length_3550, vo_c2_Locus_189_Transcript_29/60_Confidence_0.015_Length_692, vo_c3_Locus_2031_Transcript_8/8_Confidence_0.111_Length_1389, vo_n2_Locus_636_Transcript_16/16_Confidence_0.139_Length_616, vo_n2_Locus_636_Transcript_14/16_Confidence_0.222_Length_622, vo_n2_Locus_636_Transcript_5/16_Confidence_0.194_Length_591, vo_n2_Locus_636_Transcript_3/16_Confidence_0.306_Length_685, vo_n2_Locus_30747_Transcript_1/1_Confidence_0.000_Length_951, vo_n2_Locus_636_Transcript_13/16_Confidence_0.222_Length_768, vo_n2_Locus_14051_Transcript_7/8_Confidence_0.077_Length_1546, tri_c_comp14810_c0_seq3, vo_c2_Locus_2261_Transcript_1/2_Confidence_1.000_Length_2564, vo_c3_Locus_5948_Transcript_1/1_Confidence_0.000_Length_1027, vo_n2_Locus_16945_Transcript_1/3_Confidence_0.500_Length_1084, vo_c3_Locus_9925_Transcript_8/11_Confidence_0.263_Length_3550, vo_n1_Locus_11137_Transcript_5/5_Confidence_0.143_Length_2829, vo_n2_Locus_16945_Transcript_3/3_Confidence_0.000_Length_746, vo_n2_Locus_30747_Transcript_1/1_Confidence_0.000_Length_951, vo_c2_Locus_2261_Transcript_1/2_Confidence_1.000_Length_2564, vo_n1_Locus_9414_Transcript_8/13_Confidence_0.167_Length_606, vo_c1_Locus_40339_Transcript_1/1_Confidence_0.000_Length_1318, vo_c3_Locus_2031_Transcript_8/8_Confidence_0.111_Length_1389, vo_n1_Locus_11137_Transcript_5/5_Confidence_0.143_Length_2829, vo_c1_Locus_4675_Transcript_3/3_Confidence_0.200_Length_1348, vo_n2_Locus_30747_Transcript_1/1_Confidence_0.000_Length_951, vo_n2_Locus_636_Transcript_13/16_Confidence_0.222_Length_768, vo_c1_Locus_2815_Transcript_3/4_Confidence_0.200_Length_2244, vo_c3_Locus_9925_Transcript_8/11_Confidence_0.263_Length_3550, tri_n_comp42565_c0_seq1, vo_c2_Locus_189_Transcript_29/60_Confidence_0.015_Length_692, vo_n2_Locus_636_Transcript_16/16_Confidence_0.139_Length_616, vo_n2_Locus_636_Transcript_14/16_Confidence_0.222_Length_622, vo_n2_Locus_636_Transcript_5/16_Confidence_0.194_Length_591, vo_n2_Locus_636_Transcript_3/16_Confidence_0.306_Length_685 |
|-----------------------|----------|---|--------------------------------------------------------------------------------------------------------------------------------|-----------------|-------------------------------------------------------------------------------------------------------------------------------------------------------------------------------------------------------------------------------------------------------------------------------------------------------------------------------------------------------------------------------------------------------------------------------------------------------------------------------------------------------------------------------------------------------------------------------------------------------------------------------------------------------------------------------------------------------------------------------------------------------------------------------------------------------------------------------------------------------------------------------------------------------------------------------------------------------------------------------------------------------------------------------------------------------------------------------------------------------------------------------------------------------------------------------------------------------------------------------------------------------------------------------------------------------------------------------------------------------------------------------------------------------------------------------------------------------------------------------------------------------------------------------------------------------------------------------------------------------------------------------------------------------------------------------------------------------------------------------------------------------------------------------------------------------------------------------------------------------------------------------------------------------------------------------------------------------------------------------------------------------------------------------------------------------------------------------------------------------------------------------------------------------------------------------------------------------------------------------------------------------------------------------------------------------------------------------------------------------------------------------------------------------------------------------------------------------------------------------------------------------------------|

|                                         |          |   |                                                                                                                                          |               |                                                                                                                                                                                                                                                                                                                                                                                                                                                                                                                                                                                                                                                                                                                                                                                                                                                                                                                                                                                                                                                                                           |
|-----------------------------------------|----------|---|------------------------------------------------------------------------------------------------------------------------------------------|---------------|-------------------------------------------------------------------------------------------------------------------------------------------------------------------------------------------------------------------------------------------------------------------------------------------------------------------------------------------------------------------------------------------------------------------------------------------------------------------------------------------------------------------------------------------------------------------------------------------------------------------------------------------------------------------------------------------------------------------------------------------------------------------------------------------------------------------------------------------------------------------------------------------------------------------------------------------------------------------------------------------------------------------------------------------------------------------------------------------|
| Biosynthesis of unsaturated fatty acids | map01040 | 5 | ec:1.1.1.100 - reductase,<br>ec:1.3.3.6 - oxidase,<br>ec:3.1.2.2 - hydrolase,<br>ec:4.2.1.17 - hydratase,<br>ec:1.14.19.1 - 9-desaturase | 4, 2, 2, 7, 3 | vo_n3_Locus_484_Transcript_6/12_Confidence_0.250_Length_1533, vo_c2_Locus_12502_Transcript_2/2_Confidence_0.000_Length_781, vo_n3_Locus_484_Transcript_5/12_Confidence_0.250_Length_1451, vo_c2_Locus_2193_Transcript_1/3_Confidence_0.667_Length_1218, tri_n_comp36670_c0_seq1, vo_n1_Locus_23625_Transcript_1/1_Confidence_0.000_Length_2286, vo_n2_Locus_14051_Transcript_7/8_Confidence_0.077_Length_1546, tri_c_comp14810_c0_seq3, vo_c2_Locus_2261_Transcript_1/2_Confidence_1.000_Length_2564, vo_c3_Locus_5948_Transcript_1/1_Confidence_0.000_Length_1027, vo_n2_Locus_16945_Transcript_1/3_Confidence_0.500_Length_1084, vo_c3_Locus_9925_Transcript_8/11_Confidence_0.263_Length_3550, vo_n1_Locus_11137_Transcript_5/5_Confidence_0.143_Length_2829, vo_n2_Locus_16945_Transcript_3/3_Confidence_0.000_Length_746, vo_n2_Locus_30747_Transcript_1/1_Confidence_0.000_Length_951, vo_c1_Locus_20327_Transcript_1/1_Confidence_0.000_Length_657, vo_c1_Locus_3644_Transcript_23/23_Confidence_0.148_Length_1685, vo_c1_Locus_3644_Transcript_11/23_Confidence_0.556_Length_1703 |
|-----------------------------------------|----------|---|------------------------------------------------------------------------------------------------------------------------------------------|---------------|-------------------------------------------------------------------------------------------------------------------------------------------------------------------------------------------------------------------------------------------------------------------------------------------------------------------------------------------------------------------------------------------------------------------------------------------------------------------------------------------------------------------------------------------------------------------------------------------------------------------------------------------------------------------------------------------------------------------------------------------------------------------------------------------------------------------------------------------------------------------------------------------------------------------------------------------------------------------------------------------------------------------------------------------------------------------------------------------|

|                      |          |   |                                                                                                                                                                                                  |               |                                                                                                                                                                                                                                                                                                                                                                                                                                                                                                                              |
|----------------------|----------|---|--------------------------------------------------------------------------------------------------------------------------------------------------------------------------------------------------|---------------|------------------------------------------------------------------------------------------------------------------------------------------------------------------------------------------------------------------------------------------------------------------------------------------------------------------------------------------------------------------------------------------------------------------------------------------------------------------------------------------------------------------------------|
| Histidine metabolism | map00340 | 5 | <p>ec:1.2.1.5 - dehydrogenase [NAD(P)+], ec:1.2.1.3 - dehydrogenase (NAD+), ec:3.1.3.15 - histidinol phosphate phosphatase, ec:2.4.2.17 - phosphoribosyltransferase, ec:5.3.1.16 - isomerase</p> | 2, 5, 1, 2, 1 | <p>tri_c_comp55340_c0_seq1, tri_n_comp58061_c0_seq1, tri_c_comp55340_c0_seq1, vo_n1_Locus_19864_Transcript_2/2_Confidence_0.000_Length_2707, vo_c3_Locus_21741_Transcript_5/9_Confidence_0.583_Length_1757, vo_n3_Locus_25600_Transcript_5/6_Confidence_0.375_Length_1777, tri_n_comp58061_c0_seq1, vo_n2_Locus_24510_Transcript_1/1_Confidence_0.000_Length_1024, vo_n2_Locus_19769_Transcript_1/2_Confidence_0.333_Length_1281, tri_c_comp33903_c0_seq1, vo_n1_Locus_33739_Transcript_1/1_Confidence_0.000_Length_1392</p> |
|----------------------|----------|---|--------------------------------------------------------------------------------------------------------------------------------------------------------------------------------------------------|---------------|------------------------------------------------------------------------------------------------------------------------------------------------------------------------------------------------------------------------------------------------------------------------------------------------------------------------------------------------------------------------------------------------------------------------------------------------------------------------------------------------------------------------------|

|                              |          |   |                                                                                                                                                        |                |                                                                                                                                                                                                                                                                                                                                                                                                                                                                                                                                                                                                                                                                                                                                                                                                                                                                                                                                                                                                                                                                                                                                                                                                                                                                                                                                                                                                                                                                                                                                                                                                                                                                                                                                                                                                                                                                  |
|------------------------------|----------|---|--------------------------------------------------------------------------------------------------------------------------------------------------------|----------------|------------------------------------------------------------------------------------------------------------------------------------------------------------------------------------------------------------------------------------------------------------------------------------------------------------------------------------------------------------------------------------------------------------------------------------------------------------------------------------------------------------------------------------------------------------------------------------------------------------------------------------------------------------------------------------------------------------------------------------------------------------------------------------------------------------------------------------------------------------------------------------------------------------------------------------------------------------------------------------------------------------------------------------------------------------------------------------------------------------------------------------------------------------------------------------------------------------------------------------------------------------------------------------------------------------------------------------------------------------------------------------------------------------------------------------------------------------------------------------------------------------------------------------------------------------------------------------------------------------------------------------------------------------------------------------------------------------------------------------------------------------------------------------------------------------------------------------------------------------------|
| Phenylpropanoid biosynthesis | map00940 | 5 | ec:1.2.1.44 - reductase, ec:3.2.1.126 - beta-glucosidase, ec:3.2.1.21 - gentiobiase, ec:1.11.1.7 - lactoperoxidase, ec:2.1.1.104 - O-methyltransferase | 1, 2, 1, 25, 2 | tri_n_comp26842_c0_seq1, tri_n_comp70995_c0_seq1, vo_c3_Locus_32079_Transcript_2/2_Confidence_0.250_Length_2113, vo_c2_Locus_13105_Transcript_1/1_Confidence_0.000_Length_2797, vo_n2_Locus_3_Transcript_23668/24291_Confidence_0.000_Length_1121, vo_c1_Locus_1107_Transcript_1/4_Confidence_0.143_Length_1311, vo_c3_Locus_15467_Transcript_1/2_Confidence_0.750_Length_988, vo_c2_Locus_437_Transcript_6/7_Confidence_0.286_Length_3893, vo_c3_Locus_7802_Transcript_5/8_Confidence_0.440_Length_1882, vo_n3_Locus_6056_Transcript_2/8_Confidence_0.200_Length_1860, vo_n2_Locus_2619_Transcript_8/9_Confidence_0.357_Length_1435, vo_n2_Locus_852_Transcript_19/20_Confidence_0.419_Length_1873, vo_n3_Locus_2602_Transcript_1/2_Confidence_0.750_Length_664, tri_c_comp52750_c0_seq1, vo_n2_Locus_3_Transcript_19366/24291_Confidence_0.000_Length_2154, vo_c1_Locus_12166_Transcript_1/1_Confidence_0.000_Length_2425, vo_n3_Locus_15275_Transcript_1/5_Confidence_0.300_Length_3763, vo_n1_Locus_2648_Transcript_4/13_Confidence_0.536_Length_2114, vo_n2_Locus_2619_Transcript_6/9_Confidence_0.286_Length_1425, vo_c3_Locus_1212_Transcript_2/3_Confidence_0.333_Length_3255, vo_n1_Locus_11008_Transcript_5/16_Confidence_0.571_Length_3078, vo_n1_Locus_21070_Transcript_5/8_Confidence_0.500_Length_2178, vo_c3_Locus_15467_Transcript_2/2_Confidence_0.000_Length_1100, vo_n1_Locus_14713_Transcript_8/13_Confidence_0.529_Length_2511, vo_c3_Locus_2692_Transcript_1/3_Confidence_0.600_Length_1240, vo_n1_Locus_9334_Transcript_2/2_Confidence_0.333_Length_768, vo_c1_Locus_1967_Transcript_9/10_Confidence_0.263_Length_3482, tri_c_comp10308_c0_seq2, vo_c3_Locus_11858_Transcript_3/3_Confidence_0.000_Length_503, vo_n2_Locus_30574_Transcript_4/4_Confidence_0.000_Length_969, vo_n2_Locus_30574_Transcript_3/4_Confidence_0.500_Length_827 |
|------------------------------|----------|---|--------------------------------------------------------------------------------------------------------------------------------------------------------|----------------|------------------------------------------------------------------------------------------------------------------------------------------------------------------------------------------------------------------------------------------------------------------------------------------------------------------------------------------------------------------------------------------------------------------------------------------------------------------------------------------------------------------------------------------------------------------------------------------------------------------------------------------------------------------------------------------------------------------------------------------------------------------------------------------------------------------------------------------------------------------------------------------------------------------------------------------------------------------------------------------------------------------------------------------------------------------------------------------------------------------------------------------------------------------------------------------------------------------------------------------------------------------------------------------------------------------------------------------------------------------------------------------------------------------------------------------------------------------------------------------------------------------------------------------------------------------------------------------------------------------------------------------------------------------------------------------------------------------------------------------------------------------------------------------------------------------------------------------------------------------|

|                                        |          |   |                                                                                                                                                                                                                       |                |                                                                                                                                                                                                                                                                                                                                                                                                                                                                                                                                                                                                                                                                                                                                                                                                                                                                                                                                                                                                                                                                                                                                                                                                                                                                                                                                                                   |
|----------------------------------------|----------|---|-----------------------------------------------------------------------------------------------------------------------------------------------------------------------------------------------------------------------|----------------|-------------------------------------------------------------------------------------------------------------------------------------------------------------------------------------------------------------------------------------------------------------------------------------------------------------------------------------------------------------------------------------------------------------------------------------------------------------------------------------------------------------------------------------------------------------------------------------------------------------------------------------------------------------------------------------------------------------------------------------------------------------------------------------------------------------------------------------------------------------------------------------------------------------------------------------------------------------------------------------------------------------------------------------------------------------------------------------------------------------------------------------------------------------------------------------------------------------------------------------------------------------------------------------------------------------------------------------------------------------------|
| Various types of N-glycan biosynthesis | map00513 | 5 | ec:2.4.1.260 - alpha-1,6-mannosyltransferase, ec:3.2.1.52 - hexosaminidase, ec:3.2.1.113 - 1,2-alpha-mannosidase, ec:2.4.1.38 - beta-1,4-galactosyltransferase, ec:2.4.1.101 - 2-beta-N-acetylglucosaminyltransferase | 1, 13, 8, 2, 3 | tri_n_comp14001_c0_seq2, vo_c3_Locus_25279_Transcript_1/3_Confidence_0.500_Length_3460, tri_c_comp15706_c0_seq2, vo_n2_Locus_4554_Transcript_3/4_Confidence_0.444_Length_2253, vo_n2_Locus_3_Transcript_18735/24291_Confidence_0.000_Length_2121, vo_n2_Locus_4395_Transcript_3/3_Confidence_0.167_Length_2032, vo_c2_Locus_6406_Transcript_1/4_Confidence_0.333_Length_1666, vo_n1_Locus_14758_Transcript_1/2_Confidence_0.667_Length_1933, tri_n_comp35667_c0_seq1, vo_n2_Locus_4395_Transcript_1/3_Confidence_0.667_Length_1925, tri_c_comp32936_c0_seq1, tri_n_comp92955_c0_seq1, tri_n_comp30287_c0_seq1, vo_n2_Locus_4554_Transcript_4/4_Confidence_0.111_Length_2049, vo_n2_Locus_3852_Transcript_1/7_Confidence_0.417_Length_4358, tri_n_comp47354_c0_seq1, vo_n1_Locus_9004_Transcript_4/20_Confidence_0.171_Length_2905, vo_c1_Locus_37790_Transcript_1/1_Confidence_0.000_Length_3188, vo_c3_Locus_18796_Transcript_3/3_Confidence_0.000_Length_3826, vo_n1_Locus_24857_Transcript_1/1_Confidence_0.000_Length_2424, vo_c1_Locus_1525_Transcript_2/7_Confidence_0.167_Length_2762, vo_n2_Locus_5268_Transcript_1/2_Confidence_0.917_Length_1282, tri_c_comp20165_c0_seq7, tri_c_comp20165_c0_seq3, vo_c2_Locus_1239_Transcript_4/4_Confidence_0.000_Length_1343, tri_c_comp9226_c0_seq1, vo_n2_Locus_19192_Transcript_2/2_Confidence_0.250_Length_3053 |
|----------------------------------------|----------|---|-----------------------------------------------------------------------------------------------------------------------------------------------------------------------------------------------------------------------|----------------|-------------------------------------------------------------------------------------------------------------------------------------------------------------------------------------------------------------------------------------------------------------------------------------------------------------------------------------------------------------------------------------------------------------------------------------------------------------------------------------------------------------------------------------------------------------------------------------------------------------------------------------------------------------------------------------------------------------------------------------------------------------------------------------------------------------------------------------------------------------------------------------------------------------------------------------------------------------------------------------------------------------------------------------------------------------------------------------------------------------------------------------------------------------------------------------------------------------------------------------------------------------------------------------------------------------------------------------------------------------------|

|                     |          |   |                                                                                                                                                                                    |                     |                                                                                                                                                                                                                                                                                                                                                                                                                                                                                                                                                                                                                                                                                                                                                                                                                                                                                                                                                                                                                                                                                                                                                                                                                                                                                                                                                                                                                                                                                                                                                                                                                                                                                                                                                                                                                                                                                                                                                                                                                                                                                                                                                                                                                                                                                                                                                                                                                                                                                                                                                                                                                                                                                                                                                                                                                                                                                                                                                                                                                                                                                                                                                                                                                                                                                                                                                                                                                                                                                                                                                                                                                                                                                                                                                                                                                                                                                                                                                                                                                                                                                                                                                                                                                                                                                                                                                                                                                                                                                                                                                                                                                                                                                                                                                                                                                                                                                                                                                                                                                              |
|---------------------|----------|---|------------------------------------------------------------------------------------------------------------------------------------------------------------------------------------|---------------------|------------------------------------------------------------------------------------------------------------------------------------------------------------------------------------------------------------------------------------------------------------------------------------------------------------------------------------------------------------------------------------------------------------------------------------------------------------------------------------------------------------------------------------------------------------------------------------------------------------------------------------------------------------------------------------------------------------------------------------------------------------------------------------------------------------------------------------------------------------------------------------------------------------------------------------------------------------------------------------------------------------------------------------------------------------------------------------------------------------------------------------------------------------------------------------------------------------------------------------------------------------------------------------------------------------------------------------------------------------------------------------------------------------------------------------------------------------------------------------------------------------------------------------------------------------------------------------------------------------------------------------------------------------------------------------------------------------------------------------------------------------------------------------------------------------------------------------------------------------------------------------------------------------------------------------------------------------------------------------------------------------------------------------------------------------------------------------------------------------------------------------------------------------------------------------------------------------------------------------------------------------------------------------------------------------------------------------------------------------------------------------------------------------------------------------------------------------------------------------------------------------------------------------------------------------------------------------------------------------------------------------------------------------------------------------------------------------------------------------------------------------------------------------------------------------------------------------------------------------------------------------------------------------------------------------------------------------------------------------------------------------------------------------------------------------------------------------------------------------------------------------------------------------------------------------------------------------------------------------------------------------------------------------------------------------------------------------------------------------------------------------------------------------------------------------------------------------------------------------------------------------------------------------------------------------------------------------------------------------------------------------------------------------------------------------------------------------------------------------------------------------------------------------------------------------------------------------------------------------------------------------------------------------------------------------------------------------------------------------------------------------------------------------------------------------------------------------------------------------------------------------------------------------------------------------------------------------------------------------------------------------------------------------------------------------------------------------------------------------------------------------------------------------------------------------------------------------------------------------------------------------------------------------------------------------------------------------------------------------------------------------------------------------------------------------------------------------------------------------------------------------------------------------------------------------------------------------------------------------------------------------------------------------------------------------------------------------------------------------------------------------------------------|
| Thiamine metabolism | map00730 | 5 | <p>ec:2.7.4.3 - kinase,<br/> ec:2.2.1.7 - synthase,<br/> ec:2.8.1.7 - desulfurase,<br/> ec:3.6.1.15 - phosphatase,<br/> ec:3.6.1.28 - ec:3.6.1.28<br/> thiamine-triphosphatase</p> | 10, 1, 7,<br>54, 10 | <p>vo_c2_Locus_10361_Transcript_6/7_Confidence_0.250_Length_1220, tri_c_comp24673_c0_seq1,<br/> vo_n1_Locus_2451_Transcript_1/3_Confidence_0.600_Length_2348, vo_c3_Locus_4102_Transcript_1/1_Confidence_0.000_Length_1034,<br/> vo_n2_Locus_22654_Transcript_1/1_Confidence_0.000_Length_691, vo_n1_Locus_2897_Transcript_2/14_Confidence_0.160_Length_971,<br/> vo_n2_Locus_14542_Transcript_1/3_Confidence_0.200_Length_924, vo_n3_Locus_12191_Transcript_1/1_Confidence_0.000_Length_1671,<br/> vo_n2_Locus_5279_Transcript_1/1_Confidence_0.333_Length_2493, vo_n3_Locus_24634_Transcript_1/1_Confidence_0.000_Length_445,<br/> vo_c1_Locus_12331_Transcript_1/1_Confidence_0.000_Length_2548, vo_n2_Locus_8711_Transcript_5/5_Confidence_0.067_Length_1558,<br/> vo_c2_Locus_11984_Transcript_2/6_Confidence_0.385_Length_1557, vo_c3_Locus_9097_Transcript_2/4_Confidence_0.600_Length_3293,<br/> tri_n_comp37185_c0_seq1, vo_c1_Locus_38066_Transcript_1/1_Confidence_0.000_Length_1674,<br/> vo_c2_Locus_14495_Transcript_1/4_Confidence_0.714_Length_1830, tri_c_comp30049_c0_seq1,<br/> vo_c1_Locus_103_Transcript_20/42_Confidence_0.312_Length_4488, vo_n2_Locus_12749_Transcript_4/14_Confidence_0.387_Length_2426,<br/> vo_c3_Locus_9603_Transcript_2/4_Confidence_0.286_Length_3163, vo_c3_Locus_779_Transcript_1/37_Confidence_0.227_Length_6196,<br/> tri_c_comp21210_c0_seq2, vo_n3_Locus_479_Transcript_48/55_Confidence_0.124_Length_2107,<br/> vo_c3_Locus_2891_Transcript_1/3_Confidence_0.667_Length_13029, vo_c3_Locus_5178_Transcript_4/7_Confidence_0.636_Length_3142,<br/> vo_n2_Locus_5227_Transcript_2/3_Confidence_0.200_Length_602, vo_n3_Locus_9266_Transcript_10/10_Confidence_0.000_Length_869,<br/> vo_c1_Locus_103_Transcript_18/42_Confidence_0.385_Length_4716, tri_c_comp22413_c0_seq1,<br/> vo_c2_Locus_579_Transcript_49/548_Confidence_0.023_Length_681, vo_c1_Locus_3866_Transcript_5/15_Confidence_0.087_Length_4747,<br/> vo_c3_Locus_2001_Transcript_1/1_Confidence_0.000_Length_1692, vo_n2_Locus_13957_Transcript_1/1_Confidence_0.000_Length_2805,<br/> vo_n2_Locus_4636_Transcript_1/1_Confidence_0.000_Length_673, vo_n3_Locus_19594_Transcript_3/22_Confidence_0.055_Length_2072,<br/> vo_c3_Locus_5178_Transcript_7/7_Confidence_0.000_Length_4922, tri_c_comp20372_c0_seq3,<br/> vo_c3_Locus_17023_Transcript_2/5_Confidence_0.636_Length_3545, vo_n2_Locus_3_Transcript_857/24291_Confidence_0.000_Length_759,<br/> tri_n_comp20573_c1_seq4, vo_c2_Locus_1396_Transcript_1/1_Confidence_0.000_Length_1736,<br/> vo_c3_Locus_779_Transcript_28/37_Confidence_0.242_Length_6237, tri_c_comp65239_c0_seq1,<br/> vo_n2_Locus_21111_Transcript_1/2_Confidence_0.750_Length_1253, vo_n2_Locus_3_Transcript_856/24291_Confidence_0.000_Length_5013,<br/> tri_n_comp20573_c1_seq15, vo_c3_Locus_5178_Transcript_3/7_Confidence_0.455_Length_3313, tri_c_comp64746_c0_seq1,<br/> tri_n_comp20573_c1_seq19, vo_c2_Locus_15301_Transcript_1/1_Confidence_0.000_Length_8295,<br/> vo_c2_Locus_10960_Transcript_1/1_Confidence_0.000_Length_1278, vo_n1_Locus_3_Transcript_40/53_Confidence_0.223_Length_15279,<br/> vo_n2_Locus_3_Transcript_182/24291_Confidence_0.001_Length_1382, vo_n2_Locus_8329_Transcript_2/4_Confidence_0.429_Length_5800,<br/> vo_n2_Locus_10955_Transcript_1/1_Confidence_0.000_Length_3181, vo_n1_Locus_1858_Transcript_357/440_Confidence_0.022_Length_542,<br/> tri_n_comp20573_c1_seq11, vo_c3_Locus_28441_Transcript_1/1_Confidence_0.000_Length_1746,<br/> vo_c1_Locus_3866_Transcript_3/15_Confidence_0.261_Length_4727, tri_c_comp41567_c0_seq1,<br/> vo_n3_Locus_134_Transcript_12/14_Confidence_0.144_Length_2345, vo_c3_Locus_15362_Transcript_1/1_Confidence_0.000_Length_338,<br/> vo_n1_Locus_17075_Transcript_2/4_Confidence_0.400_Length_811, vo_n1_Locus_2896_Transcript_50/57_Confidence_0.030_Length_1147,<br/> vo_c1_Locus_4_Transcript_142/366_Confidence_0.014_Length_1282, vo_n1_Locus_4173_Transcript_1/1_Confidence_0.000_Length_2426,<br/> vo_c1_Locus_4_Transcript_154/366_Confidence_0.015_Length_713, vo_c1_Locus_12156_Transcript_1/2_Confidence_0.333_Length_14626,<br/> vo_c2_Locus_579_Transcript_142/548_Confidence_0.060_Length_1143, vo_n1_Locus_2914_Transcript_51/78_Confidence_0.046_Length_2290,<br/> vo_c1_Locus_24195_Transcript_1/1_Confidence_0.000_Length_4613, vo_c1_Locus_9802_Transcript_8/22_Confidence_0.545_Length_922,<br/> vo_c1_Locus_9802_Transcript_10/22_Confidence_0.591_Length_922, vo_c1_Locus_9802_Transcript_4/22_Confidence_0.364_Length_853,<br/> vo_n2_Locus_17976_Transcript_2/12_Confidence_0.600_Length_982, tri_n_comp19532_c0_seq1,<br/> vo_n3_Locus_5520_Transcript_13/13_Confidence_0.250_Length_964, vo_c1_Locus_36810_Transcript_1/1_Confidence_0.000_Length_784,<br/> vo_n2_Locus_17976_Transcript_11/12_Confidence_0.500_Length_998, vo_n3_Locus_5520_Transcript_4/13_Confidence_0.450_Length_941,<br/> vo_n2_Locus_17976_Transcript_6/12_Confidence_0.600_Length_1003</p> |
|---------------------|----------|---|------------------------------------------------------------------------------------------------------------------------------------------------------------------------------------|---------------------|------------------------------------------------------------------------------------------------------------------------------------------------------------------------------------------------------------------------------------------------------------------------------------------------------------------------------------------------------------------------------------------------------------------------------------------------------------------------------------------------------------------------------------------------------------------------------------------------------------------------------------------------------------------------------------------------------------------------------------------------------------------------------------------------------------------------------------------------------------------------------------------------------------------------------------------------------------------------------------------------------------------------------------------------------------------------------------------------------------------------------------------------------------------------------------------------------------------------------------------------------------------------------------------------------------------------------------------------------------------------------------------------------------------------------------------------------------------------------------------------------------------------------------------------------------------------------------------------------------------------------------------------------------------------------------------------------------------------------------------------------------------------------------------------------------------------------------------------------------------------------------------------------------------------------------------------------------------------------------------------------------------------------------------------------------------------------------------------------------------------------------------------------------------------------------------------------------------------------------------------------------------------------------------------------------------------------------------------------------------------------------------------------------------------------------------------------------------------------------------------------------------------------------------------------------------------------------------------------------------------------------------------------------------------------------------------------------------------------------------------------------------------------------------------------------------------------------------------------------------------------------------------------------------------------------------------------------------------------------------------------------------------------------------------------------------------------------------------------------------------------------------------------------------------------------------------------------------------------------------------------------------------------------------------------------------------------------------------------------------------------------------------------------------------------------------------------------------------------------------------------------------------------------------------------------------------------------------------------------------------------------------------------------------------------------------------------------------------------------------------------------------------------------------------------------------------------------------------------------------------------------------------------------------------------------------------------------------------------------------------------------------------------------------------------------------------------------------------------------------------------------------------------------------------------------------------------------------------------------------------------------------------------------------------------------------------------------------------------------------------------------------------------------------------------------------------------------------------------------------------------------------------------------------------------------------------------------------------------------------------------------------------------------------------------------------------------------------------------------------------------------------------------------------------------------------------------------------------------------------------------------------------------------------------------------------------------------------------------------------------------------------------------|



|                           |          |   |                                                                                                                       |            |                                                                                                                                                                                                                                                                                                                                                                                                                                                                                                                                                                                                                                                                                                                                                                           |
|---------------------------|----------|---|-----------------------------------------------------------------------------------------------------------------------|------------|---------------------------------------------------------------------------------------------------------------------------------------------------------------------------------------------------------------------------------------------------------------------------------------------------------------------------------------------------------------------------------------------------------------------------------------------------------------------------------------------------------------------------------------------------------------------------------------------------------------------------------------------------------------------------------------------------------------------------------------------------------------------------|
| Aminobenzoate degradation | map00627 | 4 | ec:3.5.1.4 - acylamidase,<br>ec:3.5.5.1 - acetonitrilase,<br>ec:2.8.3.8 - CoA-transferase,<br>ec:4.2.1.17 - hydratase | 3, 1, 1, 7 | vo_c3_Locus_1581_Transcript_3/3_Confidence_0.000_Length_1736, vo_c1_Locus_1298_Transcript_3/6_Confidence_0.625_Length_1775, vo_n2_Locus_157_Transcript_2/4_Confidence_0.286_Length_2059, vo_c2_Locus_31357_Transcript_6/7_Confidence_0.700_Length_1464, vo_c2_Locus_6864_Transcript_3/5_Confidence_0.667_Length_1701, vo_c2_Locus_2261_Transcript_1/2_Confidence_1.000_Length_2564, vo_c3_Locus_5948_Transcript_1/1_Confidence_0.000_Length_1027, vo_n2_Locus_16945_Transcript_1/3_Confidence_0.500_Length_1084, vo_c3_Locus_9925_Transcript_8/11_Confidence_0.263_Length_3550, vo_n1_Locus_11137_Transcript_5/5_Confidence_0.143_Length_2829, vo_n2_Locus_16945_Transcript_3/3_Confidence_0.000_Length_746, vo_n2_Locus_30747_Transcript_1/1_Confidence_0.000_Length_951 |
|---------------------------|----------|---|-----------------------------------------------------------------------------------------------------------------------|------------|---------------------------------------------------------------------------------------------------------------------------------------------------------------------------------------------------------------------------------------------------------------------------------------------------------------------------------------------------------------------------------------------------------------------------------------------------------------------------------------------------------------------------------------------------------------------------------------------------------------------------------------------------------------------------------------------------------------------------------------------------------------------------|

|                                    |          |   |                                                                                                                            |            |                                                                                                                                                                                                                                                                                         |
|------------------------------------|----------|---|----------------------------------------------------------------------------------------------------------------------------|------------|-----------------------------------------------------------------------------------------------------------------------------------------------------------------------------------------------------------------------------------------------------------------------------------------|
| Taurine and hypotaurine metabolism | map00430 | 4 | ec:1.4.1.2 - dehydrogenase, ec:1.13.11.19 - dioxygenase, ec:1.13.11.20 - dioxygenase, ec:2.3.2.2 - glutamyl transpeptidase | 1, 1, 2, 1 | tri_c_comp28026_c0_seq1, vo_c2_Locus_13192_Transcript_5/6_Confidence_0.625_Length_1572, vo_c2_Locus_20699_Transcript_22/34_Confidence_0.180_Length_2604, vo_c2_Locus_20699_Transcript_12/34_Confidence_0.165_Length_2453, vo_n2_Locus_15602_Transcript_2/2_Confidence_0.250_Length_2162 |
|------------------------------------|----------|---|----------------------------------------------------------------------------------------------------------------------------|------------|-----------------------------------------------------------------------------------------------------------------------------------------------------------------------------------------------------------------------------------------------------------------------------------------|

|                       |          |   |                                                                                                                     |            |                                                                                                                                                                                                                                                                                                                                                                                                                                                                                                                               |
|-----------------------|----------|---|---------------------------------------------------------------------------------------------------------------------|------------|-------------------------------------------------------------------------------------------------------------------------------------------------------------------------------------------------------------------------------------------------------------------------------------------------------------------------------------------------------------------------------------------------------------------------------------------------------------------------------------------------------------------------------|
| Vitamin B6 metabolism | map00750 | 4 | ec:1.4.3.5 - 5'-phosphate synthase, ec:2.6.1.52 - transaminase, ec:2.7.1.35 - kinase, ec:1.1.1.65 - 4-dehydrogenase | 3, 4, 1, 2 | vo_n2_Locus_7212_Transcript_6/7_Confidence_0.200_Length_1176, vo_c1_Locus_11209_Transcript_1/1_Confidence_0.000_Length_1909, vo_c2_Locus_1774_Transcript_2/5_Confidence_0.312_Length_1184, vo_n2_Locus_2440_Transcript_3/6_Confidence_0.182_Length_1751, tri_c_comp24934_c0_seq1, vo_c3_Locus_9067_Transcript_6/7_Confidence_0.125_Length_1757, vo_c2_Locus_1886_Transcript_3/5_Confidence_0.444_Length_2764, tri_c_comp52297_c0_seq1, vo_n3_Locus_36384_Transcript_1/1_Confidence_0.000_Length_1316, tri_n_comp17407_c0_seq1 |
|-----------------------|----------|---|---------------------------------------------------------------------------------------------------------------------|------------|-------------------------------------------------------------------------------------------------------------------------------------------------------------------------------------------------------------------------------------------------------------------------------------------------------------------------------------------------------------------------------------------------------------------------------------------------------------------------------------------------------------------------------|

|                                                      |          |   |                                                                                                                         |              |                                                                                                                                                                                                                                                                                                                                                                                                                                                                                                                                                                                                                                                                                                                                                                                                                                                                                                                                                                                                                                                                                                                                                                                                                                                                                                                                                                                                                                                                                                                                                                                                                                                                                                                                                                                                                                                                                                                                                                                                                                                                                                                                                                                                                                                                                                                                                                                                                                                                                                                                                                                                                                                                                                                                                                                                                                                                                                                                                                             |
|------------------------------------------------------|----------|---|-------------------------------------------------------------------------------------------------------------------------|--------------|-----------------------------------------------------------------------------------------------------------------------------------------------------------------------------------------------------------------------------------------------------------------------------------------------------------------------------------------------------------------------------------------------------------------------------------------------------------------------------------------------------------------------------------------------------------------------------------------------------------------------------------------------------------------------------------------------------------------------------------------------------------------------------------------------------------------------------------------------------------------------------------------------------------------------------------------------------------------------------------------------------------------------------------------------------------------------------------------------------------------------------------------------------------------------------------------------------------------------------------------------------------------------------------------------------------------------------------------------------------------------------------------------------------------------------------------------------------------------------------------------------------------------------------------------------------------------------------------------------------------------------------------------------------------------------------------------------------------------------------------------------------------------------------------------------------------------------------------------------------------------------------------------------------------------------------------------------------------------------------------------------------------------------------------------------------------------------------------------------------------------------------------------------------------------------------------------------------------------------------------------------------------------------------------------------------------------------------------------------------------------------------------------------------------------------------------------------------------------------------------------------------------------------------------------------------------------------------------------------------------------------------------------------------------------------------------------------------------------------------------------------------------------------------------------------------------------------------------------------------------------------------------------------------------------------------------------------------------------------|
| C5-<br>Branched<br>dibasic<br>acid<br>metabolis<br>m | map00660 | 4 | ec:2.2.1.6 - synthase,<br>ec:4.1.3.24 - lyase,<br>ec:6.2.1.5 - ligase (ADP-<br>forming), ec:1.1.1.85 -<br>dehydrogenase | 1, 15, 28, 2 | tri_n_comp26150_c0_seq1, vo_c1_Locus_9668_Transcript_5/11_Confidence_0.391_Length_1245,<br>vo_c2_Locus_3988_Transcript_2/10_Confidence_0.500_Length_1233, vo_n3_Locus_4554_Transcript_5/8_Confidence_0.600_Length_1377,<br>vo_c2_Locus_3988_Transcript_1/10_Confidence_0.607_Length_1361, vo_n1_Locus_2626_Transcript_19/26_Confidence_0.238_Length_3851,<br>vo_c1_Locus_9668_Transcript_4/11_Confidence_0.435_Length_1360, vo_n1_Locus_2626_Transcript_15/26_Confidence_0.262_Length_1311,<br>vo_c1_Locus_9668_Transcript_6/11_Confidence_0.348_Length_1630, vo_n2_Locus_3_Transcript_5064/24291_Confidence_0.000_Length_1233,<br>vo_n3_Locus_4554_Transcript_6/8_Confidence_0.533_Length_1337, vo_c2_Locus_3988_Transcript_5/10_Confidence_0.536_Length_2785,<br>vo_n1_Locus_2626_Transcript_18/26_Confidence_0.310_Length_2079, vo_c2_Locus_3988_Transcript_7/10_Confidence_0.500_Length_1273,<br>vo_n2_Locus_3_Transcript_5069/24291_Confidence_0.000_Length_1240, vo_c2_Locus_3988_Transcript_9/10_Confidence_0.429_Length_1401,<br>vo_c1_Locus_2207_Transcript_20/51_Confidence_0.393_Length_3556, vo_c3_Locus_2283_Transcript_28/38_Confidence_0.331_Length_3501,<br>vo_n3_Locus_1164_Transcript_30/46_Confidence_0.400_Length_3745, tri_c_comp20184_c0_seq2,<br>vo_c2_Locus_7270_Transcript_1/1_Confidence_0.500_Length_1488, vo_c1_Locus_31_Transcript_859/1155_Confidence_0.002_Length_1257,<br>vo_n3_Locus_1164_Transcript_32/46_Confidence_0.456_Length_3745, vo_n1_Locus_3448_Transcript_46/64_Confidence_0.085_Length_783,<br>vo_c2_Locus_644_Transcript_12/40_Confidence_0.459_Length_3665, vo_n3_Locus_1164_Transcript_35/46_Confidence_0.511_Length_3745,<br>vo_c3_Locus_5_Transcript_229/353_Confidence_0.004_Length_952, vo_c2_Locus_644_Transcript_3/40_Confidence_0.071_Length_957,<br>vo_n1_Locus_3448_Transcript_53/64_Confidence_0.225_Length_3567, vo_n2_Locus_386_Transcript_32/33_Confidence_0.208_Length_3664,<br>vo_n1_Locus_3448_Transcript_63/64_Confidence_0.318_Length_3637, vo_n3_Locus_1164_Transcript_33/46_Confidence_0.456_Length_3748,<br>vo_c3_Locus_2283_Transcript_26/38_Confidence_0.285_Length_3501, vo_n2_Locus_386_Transcript_22/33_Confidence_0.376_Length_3568,<br>vo_c3_Locus_2283_Transcript_29/38_Confidence_0.292_Length_3501, vo_n2_Locus_386_Transcript_1/33_Confidence_0.139_Length_3600,<br>vo_c2_Locus_644_Transcript_24/40_Confidence_0.398_Length_3511, vo_n3_Locus_1164_Transcript_43/46_Confidence_0.389_Length_3338,<br>vo_c1_Locus_2207_Transcript_39/51_Confidence_0.250_Length_3586, vo_c3_Locus_79_Transcript_1/3_Confidence_0.200_Length_5222,<br>vo_c2_Locus_52_Transcript_234/466_Confidence_0.003_Length_1462, vo_n2_Locus_386_Transcript_10/33_Confidence_0.376_Length_3676,<br>vo_n1_Locus_1394_Transcript_2/3_Confidence_0.400_Length_2232, tri_n_comp19507_c0_seq6,<br>vo_n1_Locus_6924_Transcript_4/6_Confidence_0.444_Length_1647, vo_n1_Locus_6924_Transcript_3/6_Confidence_0.222_Length_1163 |
|------------------------------------------------------|----------|---|-------------------------------------------------------------------------------------------------------------------------|--------------|-----------------------------------------------------------------------------------------------------------------------------------------------------------------------------------------------------------------------------------------------------------------------------------------------------------------------------------------------------------------------------------------------------------------------------------------------------------------------------------------------------------------------------------------------------------------------------------------------------------------------------------------------------------------------------------------------------------------------------------------------------------------------------------------------------------------------------------------------------------------------------------------------------------------------------------------------------------------------------------------------------------------------------------------------------------------------------------------------------------------------------------------------------------------------------------------------------------------------------------------------------------------------------------------------------------------------------------------------------------------------------------------------------------------------------------------------------------------------------------------------------------------------------------------------------------------------------------------------------------------------------------------------------------------------------------------------------------------------------------------------------------------------------------------------------------------------------------------------------------------------------------------------------------------------------------------------------------------------------------------------------------------------------------------------------------------------------------------------------------------------------------------------------------------------------------------------------------------------------------------------------------------------------------------------------------------------------------------------------------------------------------------------------------------------------------------------------------------------------------------------------------------------------------------------------------------------------------------------------------------------------------------------------------------------------------------------------------------------------------------------------------------------------------------------------------------------------------------------------------------------------------------------------------------------------------------------------------------------------|

|                                                   |                 |          |                                                                                                                                           |                   |                                                                                                                                                                                                                                                                                                                                                                                                                                                                                                                                                                                                                                                                                                                                                                                                            |
|---------------------------------------------------|-----------------|----------|-------------------------------------------------------------------------------------------------------------------------------------------|-------------------|------------------------------------------------------------------------------------------------------------------------------------------------------------------------------------------------------------------------------------------------------------------------------------------------------------------------------------------------------------------------------------------------------------------------------------------------------------------------------------------------------------------------------------------------------------------------------------------------------------------------------------------------------------------------------------------------------------------------------------------------------------------------------------------------------------|
| <p>Synthesis and degradation of ketone bodies</p> | <p>map00072</p> | <p>4</p> | <p>ec:2.3.1.9 - C-acetyltransferase,<br/> ec:2.3.3.10 - synthase,<br/> ec:2.8.3.5 - CoA-transferase,<br/> ec:1.1.1.30 - dehydrogenase</p> | <p>2, 4, 1, 6</p> | <p>vo_c1_Locus_2657_Transcript_1/1_Confidence_0.000_Length_1513, vo_n2_Locus_23058_Transcript_1/1_Confidence_0.000_Length_1342, vo_n2_Locus_634_Transcript_4/6_Confidence_0.357_Length_8557, tri_c_comp57035_c0_seq1, vo_c1_Locus_1809_Transcript_1/1_Confidence_0.000_Length_3087, vo_c3_Locus_18718_Transcript_1/1_Confidence_0.000_Length_2686, vo_c2_Locus_6864_Transcript_3/5_Confidence_0.667_Length_1701, vo_c3_Locus_1735_Transcript_2/3_Confidence_0.333_Length_8270, vo_c2_Locus_9268_Transcript_2/5_Confidence_0.500_Length_8293, vo_n2_Locus_10545_Transcript_1/1_Confidence_0.000_Length_1731, vo_n2_Locus_12693_Transcript_1/1_Confidence_0.000_Length_2082, vo_n2_Locus_19729_Transcript_5/6_Confidence_0.500_Length_1106, vo_c1_Locus_1033_Transcript_1/1_Confidence_0.000_Length_1983</p> |
|---------------------------------------------------|-----------------|----------|-------------------------------------------------------------------------------------------------------------------------------------------|-------------------|------------------------------------------------------------------------------------------------------------------------------------------------------------------------------------------------------------------------------------------------------------------------------------------------------------------------------------------------------------------------------------------------------------------------------------------------------------------------------------------------------------------------------------------------------------------------------------------------------------------------------------------------------------------------------------------------------------------------------------------------------------------------------------------------------------|

|                                                            |          |   |                                                                                                                                                              |             |                                                                                                                                                                                                                                                                                                                                                                                                                                                                                                                                                                                                                                                                                                                                                                                                                                                                                                                                                                                                                                                                                                                                                                                                                                                                                                                                                                                                                                                                                |
|------------------------------------------------------------|----------|---|--------------------------------------------------------------------------------------------------------------------------------------------------------------|-------------|--------------------------------------------------------------------------------------------------------------------------------------------------------------------------------------------------------------------------------------------------------------------------------------------------------------------------------------------------------------------------------------------------------------------------------------------------------------------------------------------------------------------------------------------------------------------------------------------------------------------------------------------------------------------------------------------------------------------------------------------------------------------------------------------------------------------------------------------------------------------------------------------------------------------------------------------------------------------------------------------------------------------------------------------------------------------------------------------------------------------------------------------------------------------------------------------------------------------------------------------------------------------------------------------------------------------------------------------------------------------------------------------------------------------------------------------------------------------------------|
| Glycosphingolipid biosynthesis - globo and isoglobo series | map00603 | 4 | ec:3.2.1.52 - hexosaminidase, ec:2.4.1.69 - 1 galactoside alpha-(1,2)-fucosyltransferase, ec:3.2.1.22 - melibiase, ec:2.4.99.4 - alpha-2,3-sialyltransferase | 13, 6, 5, 4 | vo_c3_Locus_25279_Transcript_1/3_Confidence_0.500_Length_3460, tri_c_comp15706_c0_seq2, vo_n2_Locus_4554_Transcript_3/4_Confidence_0.444_Length_2253, vo_n2_Locus_3_Transcript_18735/24291_Confidence_0.000_Length_2121, vo_n2_Locus_4395_Transcript_3/3_Confidence_0.167_Length_2032, vo_c2_Locus_6406_Transcript_1/4_Confidence_0.333_Length_1666, vo_n1_Locus_14758_Transcript_1/2_Confidence_0.667_Length_1933, tri_n_comp35667_c0_seq1, vo_n2_Locus_4395_Transcript_1/3_Confidence_0.667_Length_1925, tri_c_comp32936_c0_seq1, tri_n_comp92955_c0_seq1, tri_n_comp30287_c0_seq1, vo_n2_Locus_4554_Transcript_4/4_Confidence_0.111_Length_2049, tri_n_comp19717_c0_seq12, vo_c3_Locus_23760_Transcript_6/6_Confidence_0.000_Length_2139, vo_c2_Locus_20640_Transcript_3/3_Confidence_0.000_Length_2001, vo_n3_Locus_30096_Transcript_2/2_Confidence_0.000_Length_2064, tri_n_comp19717_c0_seq5, tri_c_comp19907_c0_seq6, vo_c2_Locus_17150_Transcript_58/102_Confidence_0.019_Length_2519, vo_n2_Locus_11259_Transcript_1/2_Confidence_0.333_Length_2880, tri_c_comp44396_c0_seq1, vo_n2_Locus_31986_Transcript_2/2_Confidence_0.333_Length_2185, vo_n2_Locus_20375_Transcript_1/2_Confidence_0.333_Length_1577, vo_c2_Locus_30916_Transcript_1/3_Confidence_0.600_Length_1243, vo_n2_Locus_15072_Transcript_3/7_Confidence_0.429_Length_1062, vo_n2_Locus_15072_Transcript_4/7_Confidence_0.286_Length_628, vo_c1_Locus_6341_Transcript_8/13_Confidence_0.611_Length_1057 |
|------------------------------------------------------------|----------|---|--------------------------------------------------------------------------------------------------------------------------------------------------------------|-------------|--------------------------------------------------------------------------------------------------------------------------------------------------------------------------------------------------------------------------------------------------------------------------------------------------------------------------------------------------------------------------------------------------------------------------------------------------------------------------------------------------------------------------------------------------------------------------------------------------------------------------------------------------------------------------------------------------------------------------------------------------------------------------------------------------------------------------------------------------------------------------------------------------------------------------------------------------------------------------------------------------------------------------------------------------------------------------------------------------------------------------------------------------------------------------------------------------------------------------------------------------------------------------------------------------------------------------------------------------------------------------------------------------------------------------------------------------------------------------------|

|                         |          |   |                                                                                                                          |              |                                                                                                                                                                                                                                                                                                                                                                                                                                                                                                                                                                                                                                                                                                                                                                                                                                                                                                                                                                                                                                                                                                                                                                                                                                                                                                                                                                                                                                                                                                                                                                                                                                                                                                                                                                                                                                                                                                                                                                        |
|-------------------------|----------|---|--------------------------------------------------------------------------------------------------------------------------|--------------|------------------------------------------------------------------------------------------------------------------------------------------------------------------------------------------------------------------------------------------------------------------------------------------------------------------------------------------------------------------------------------------------------------------------------------------------------------------------------------------------------------------------------------------------------------------------------------------------------------------------------------------------------------------------------------------------------------------------------------------------------------------------------------------------------------------------------------------------------------------------------------------------------------------------------------------------------------------------------------------------------------------------------------------------------------------------------------------------------------------------------------------------------------------------------------------------------------------------------------------------------------------------------------------------------------------------------------------------------------------------------------------------------------------------------------------------------------------------------------------------------------------------------------------------------------------------------------------------------------------------------------------------------------------------------------------------------------------------------------------------------------------------------------------------------------------------------------------------------------------------------------------------------------------------------------------------------------------------|
| Caprolactam degradation | map00930 | 4 | ec:1.1.1.2 - dehydrogenase (NADP+), ec:1.14.15.3 - 1-monooxygenase, ec:4.2.1.17 - hydratase, ec:1.1.1.35 - dehydrogenase | 10, 1, 7, 16 | tri_c_comp11242_c0_seq2, tri_n_comp64914_c0_seq1, vo_c2_Locus_9062_Transcript_10/11_Confidence_0.312_Length_4945, vo_n2_Locus_22224_Transcript_1/1_Confidence_0.000_Length_1370, tri_n_comp14915_c0_seq1, vo_n3_Locus_15713_Transcript_4/7_Confidence_0.429_Length_2557, tri_c_comp37399_c0_seq1, tri_n_comp58061_c0_seq1, vo_n1_Locus_22736_Transcript_1/2_Confidence_0.333_Length_1213, vo_n2_Locus_19677_Transcript_1/1_Confidence_0.000_Length_2823, vo_n2_Locus_2042_Transcript_5/7_Confidence_0.231_Length_2650, vo_c2_Locus_2261_Transcript_1/2_Confidence_1.000_Length_2564, vo_c3_Locus_5948_Transcript_1/1_Confidence_0.000_Length_1027, vo_n2_Locus_16945_Transcript_1/3_Confidence_0.500_Length_1084, vo_c3_Locus_9925_Transcript_8/11_Confidence_0.263_Length_3550, vo_n1_Locus_11137_Transcript_5/5_Confidence_0.143_Length_2829, vo_n2_Locus_16945_Transcript_3/3_Confidence_0.000_Length_746, vo_n2_Locus_30747_Transcript_1/1_Confidence_0.000_Length_951, vo_c2_Locus_2261_Transcript_1/2_Confidence_1.000_Length_2564, vo_n1_Locus_9414_Transcript_8/13_Confidence_0.167_Length_606, vo_c1_Locus_40339_Transcript_1/1_Confidence_0.000_Length_1318, vo_c3_Locus_2031_Transcript_8/8_Confidence_0.111_Length_1389, vo_n1_Locus_11137_Transcript_5/5_Confidence_0.143_Length_2829, vo_c1_Locus_4675_Transcript_3/3_Confidence_0.200_Length_1348, vo_n2_Locus_30747_Transcript_1/1_Confidence_0.000_Length_951, vo_n2_Locus_636_Transcript_13/16_Confidence_0.222_Length_768, vo_c1_Locus_2815_Transcript_3/4_Confidence_0.200_Length_2244, vo_c3_Locus_9925_Transcript_8/11_Confidence_0.263_Length_3550, tri_n_comp42565_c0_seq1, vo_c2_Locus_189_Transcript_29/60_Confidence_0.015_Length_692, vo_n2_Locus_636_Transcript_16/16_Confidence_0.139_Length_616, vo_n2_Locus_636_Transcript_14/16_Confidence_0.222_Length_622, vo_n2_Locus_636_Transcript_5/16_Confidence_0.194_Length_591, vo_n2_Locus_636_Transcript_3/16_Confidence_0.306_Length_685 |
|-------------------------|----------|---|--------------------------------------------------------------------------------------------------------------------------|--------------|------------------------------------------------------------------------------------------------------------------------------------------------------------------------------------------------------------------------------------------------------------------------------------------------------------------------------------------------------------------------------------------------------------------------------------------------------------------------------------------------------------------------------------------------------------------------------------------------------------------------------------------------------------------------------------------------------------------------------------------------------------------------------------------------------------------------------------------------------------------------------------------------------------------------------------------------------------------------------------------------------------------------------------------------------------------------------------------------------------------------------------------------------------------------------------------------------------------------------------------------------------------------------------------------------------------------------------------------------------------------------------------------------------------------------------------------------------------------------------------------------------------------------------------------------------------------------------------------------------------------------------------------------------------------------------------------------------------------------------------------------------------------------------------------------------------------------------------------------------------------------------------------------------------------------------------------------------------------|

|                                         |          |   |                                                                                                                                                                  |              |                                                                                                                                                                                                                                                                                                                                                                                                                                                                                                                                                                                                                                                                                                                                                                                                                                                                                                                                                                                                                                                                                                                                                                                                                                                                                                                                                                                                                                                                                                                                                                                                                                                                                                                                                                                                                                                                                                                        |
|-----------------------------------------|----------|---|------------------------------------------------------------------------------------------------------------------------------------------------------------------|--------------|------------------------------------------------------------------------------------------------------------------------------------------------------------------------------------------------------------------------------------------------------------------------------------------------------------------------------------------------------------------------------------------------------------------------------------------------------------------------------------------------------------------------------------------------------------------------------------------------------------------------------------------------------------------------------------------------------------------------------------------------------------------------------------------------------------------------------------------------------------------------------------------------------------------------------------------------------------------------------------------------------------------------------------------------------------------------------------------------------------------------------------------------------------------------------------------------------------------------------------------------------------------------------------------------------------------------------------------------------------------------------------------------------------------------------------------------------------------------------------------------------------------------------------------------------------------------------------------------------------------------------------------------------------------------------------------------------------------------------------------------------------------------------------------------------------------------------------------------------------------------------------------------------------------------|
| Drug<br>metabolism -<br>cytochrome P450 | map00982 | 4 | ec:2.5.1.18 - transferase,<br>ec:1.2.1.5 - dehydrogenase<br>[NAD(P)+], ec:2.4.1.17 - 1-<br>naphthol<br>glucuronyltransferase,<br>ec:1.14.13.8 -<br>monooxygenase | 11, 2, 13, 7 | vo_c3_Locus_7919_Transcript_7/13_Confidence_0.524_Length_1057, vo_c3_Locus_483_Transcript_11/12_Confidence_0.217_Length_759,<br>vo_c2_Locus_8227_Transcript_3/3_Confidence_0.143_Length_1106, vo_c2_Locus_8227_Transcript_2/3_Confidence_0.571_Length_1060,<br>vo_n2_Locus_34681_Transcript_5/6_Confidence_0.077_Length_2256, vo_c1_Locus_15275_Transcript_1/2_Confidence_0.333_Length_968,<br>vo_n2_Locus_8358_Transcript_1/8_Confidence_0.444_Length_1513, vo_n2_Locus_2232_Transcript_6/7_Confidence_0.455_Length_2038,<br>vo_c2_Locus_1790_Transcript_5/10_Confidence_0.474_Length_1047, vo_n2_Locus_8358_Transcript_6/8_Confidence_0.389_Length_1051,<br>tri_n_comp38105_c0_seq1, tri_c_comp55340_c0_seq1, tri_n_comp58061_c0_seq1, tri_c_comp6209_c0_seq1,<br>vo_c1_Locus_26340_Transcript_5/9_Confidence_0.600_Length_1699, tri_n_comp65990_c0_seq1,<br>vo_n1_Locus_13372_Transcript_1/2_Confidence_0.333_Length_1687, vo_n2_Locus_34154_Transcript_3/3_Confidence_0.000_Length_2043,<br>vo_n2_Locus_668_Transcript_17/17_Confidence_0.070_Length_2403, tri_c_comp58135_c0_seq1,<br>vo_c3_Locus_16093_Transcript_1/1_Confidence_0.000_Length_1750, vo_n1_Locus_13372_Transcript_2/2_Confidence_0.000_Length_1314,<br>vo_c2_Locus_24841_Transcript_3/3_Confidence_0.167_Length_3241, vo_n2_Locus_4774_Transcript_1/1_Confidence_0.000_Length_884,<br>vo_c1_Locus_35615_Transcript_1/1_Confidence_0.000_Length_2075, vo_n1_Locus_15639_Transcript_1/1_Confidence_0.000_Length_1086,<br>vo_c2_Locus_9064_Transcript_9/10_Confidence_0.125_Length_1602, vo_c2_Locus_18959_Transcript_7/18_Confidence_0.526_Length_1935,<br>vo_c1_Locus_8021_Transcript_2/4_Confidence_0.500_Length_2019, tri_c_comp37849_c0_seq1,<br>vo_c1_Locus_8021_Transcript_1/4_Confidence_0.625_Length_3553, vo_n1_Locus_4659_Transcript_2/2_Confidence_0.000_Length_1515,<br>vo_n2_Locus_2921_Transcript_81/114_Confidence_0.048_Length_2190 |
|-----------------------------------------|----------|---|------------------------------------------------------------------------------------------------------------------------------------------------------------------|--------------|------------------------------------------------------------------------------------------------------------------------------------------------------------------------------------------------------------------------------------------------------------------------------------------------------------------------------------------------------------------------------------------------------------------------------------------------------------------------------------------------------------------------------------------------------------------------------------------------------------------------------------------------------------------------------------------------------------------------------------------------------------------------------------------------------------------------------------------------------------------------------------------------------------------------------------------------------------------------------------------------------------------------------------------------------------------------------------------------------------------------------------------------------------------------------------------------------------------------------------------------------------------------------------------------------------------------------------------------------------------------------------------------------------------------------------------------------------------------------------------------------------------------------------------------------------------------------------------------------------------------------------------------------------------------------------------------------------------------------------------------------------------------------------------------------------------------------------------------------------------------------------------------------------------------|



|                    |          |   |                                                                                                                                                  |             |                                                                                                                                                                                                                                                                                                                                                                                                                                                                                                                                                                                                                                                                                                                                                                                                                                                                                                                                                                                                                                                                                  |
|--------------------|----------|---|--------------------------------------------------------------------------------------------------------------------------------------------------|-------------|----------------------------------------------------------------------------------------------------------------------------------------------------------------------------------------------------------------------------------------------------------------------------------------------------------------------------------------------------------------------------------------------------------------------------------------------------------------------------------------------------------------------------------------------------------------------------------------------------------------------------------------------------------------------------------------------------------------------------------------------------------------------------------------------------------------------------------------------------------------------------------------------------------------------------------------------------------------------------------------------------------------------------------------------------------------------------------|
| Retinol metabolism | map00830 | 4 | ec:1.2.1.36 - dehydrogenase, ec:1.1.1.105 - dehydrogenase (NAD+), ec:2.4.1.17 - 1-naphthol glucuronyltransferase, ec:1.14.15.3 - 1-monooxygenase | 4, 1, 13, 1 | vo_n1_Locus_10504_Transcript_2/2_Confidence_0.000_Length_1272, vo_c2_Locus_9062_Transcript_10/11_Confidence_0.312_Length_4945, tri_c_comp22527_c0_seq1, vo_c2_Locus_9062_Transcript_1/11_Confidence_0.312_Length_4797, vo_n2_Locus_15985_Transcript_2/3_Confidence_0.750_Length_1260, tri_c_comp6209_c0_seq1, vo_c1_Locus_26340_Transcript_5/9_Confidence_0.600_Length_1699, tri_n_comp65990_c0_seq1, vo_n1_Locus_13372_Transcript_1/2_Confidence_0.333_Length_1687, vo_n2_Locus_34154_Transcript_3/3_Confidence_0.000_Length_2043, vo_n2_Locus_668_Transcript_17/17_Confidence_0.070_Length_2403, tri_c_comp58135_c0_seq1, vo_c3_Locus_16093_Transcript_1/1_Confidence_0.000_Length_1750, vo_n1_Locus_13372_Transcript_2/2_Confidence_0.000_Length_1314, vo_c2_Locus_24841_Transcript_3/3_Confidence_0.167_Length_3241, vo_n2_Locus_4774_Transcript_1/1_Confidence_0.000_Length_884, vo_c1_Locus_35615_Transcript_1/1_Confidence_0.000_Length_2075, vo_n1_Locus_15639_Transcript_1/1_Confidence_0.000_Length_1086, vo_n2_Locus_2042_Transcript_5/7_Confidence_0.231_Length_2650 |
|--------------------|----------|---|--------------------------------------------------------------------------------------------------------------------------------------------------|-------------|----------------------------------------------------------------------------------------------------------------------------------------------------------------------------------------------------------------------------------------------------------------------------------------------------------------------------------------------------------------------------------------------------------------------------------------------------------------------------------------------------------------------------------------------------------------------------------------------------------------------------------------------------------------------------------------------------------------------------------------------------------------------------------------------------------------------------------------------------------------------------------------------------------------------------------------------------------------------------------------------------------------------------------------------------------------------------------|

|                                                     |          |   |                                                                                                            |          |                                                                                                                                                                                                                                                                                                                                                                                                                                                                                                                                                                                                                                                                                                                                                                                                                                                                                                                                                                                                                                                                                                                                                                                                                           |
|-----------------------------------------------------|----------|---|------------------------------------------------------------------------------------------------------------|----------|---------------------------------------------------------------------------------------------------------------------------------------------------------------------------------------------------------------------------------------------------------------------------------------------------------------------------------------------------------------------------------------------------------------------------------------------------------------------------------------------------------------------------------------------------------------------------------------------------------------------------------------------------------------------------------------------------------------------------------------------------------------------------------------------------------------------------------------------------------------------------------------------------------------------------------------------------------------------------------------------------------------------------------------------------------------------------------------------------------------------------------------------------------------------------------------------------------------------------|
| Glycosphingolipid biosynthesis - ganglioside series | map00604 | 3 | ec:3.2.1.52 - hexosaminidase, ec:3.2.1.23 - lactase (ambiguous), ec:2.4.99.4 - alpha-2,3-sialyltransferase | 13, 6, 4 | vo_c3_Locus_25279_Transcript_1/3_Confidence_0.500_Length_3460, tri_c_comp15706_c0_seq2, vo_n2_Locus_4554_Transcript_3/4_Confidence_0.444_Length_2253, vo_n2_Locus_3_Transcript_18735/24291_Confidence_0.000_Length_2121, vo_n2_Locus_4395_Transcript_3/3_Confidence_0.167_Length_2032, vo_c2_Locus_6406_Transcript_1/4_Confidence_0.333_Length_1666, vo_n1_Locus_14758_Transcript_1/2_Confidence_0.667_Length_1933, tri_n_comp35667_c0_seq1, vo_n2_Locus_4395_Transcript_1/3_Confidence_0.667_Length_1925, tri_c_comp32936_c0_seq1, tri_n_comp92955_c0_seq1, tri_n_comp30287_c0_seq1, vo_n2_Locus_4554_Transcript_4/4_Confidence_0.111_Length_2049, tri_c_comp12867_c0_seq1, vo_n2_Locus_1748_Transcript_2/3_Confidence_0.333_Length_4221, tri_n_comp70995_c0_seq1, vo_c2_Locus_26351_Transcript_1/2_Confidence_0.500_Length_4013, vo_c3_Locus_8047_Transcript_1/2_Confidence_0.333_Length_4021, vo_c3_Locus_32079_Transcript_2/2_Confidence_0.250_Length_2113, vo_c2_Locus_30916_Transcript_1/3_Confidence_0.600_Length_1243, vo_n2_Locus_15072_Transcript_3/7_Confidence_0.429_Length_1062, vo_n2_Locus_15072_Transcript_4/7_Confidence_0.286_Length_628, vo_c1_Locus_6341_Transcript_8/13_Confidence_0.611_Length_1057 |
|-----------------------------------------------------|----------|---|------------------------------------------------------------------------------------------------------------|----------|---------------------------------------------------------------------------------------------------------------------------------------------------------------------------------------------------------------------------------------------------------------------------------------------------------------------------------------------------------------------------------------------------------------------------------------------------------------------------------------------------------------------------------------------------------------------------------------------------------------------------------------------------------------------------------------------------------------------------------------------------------------------------------------------------------------------------------------------------------------------------------------------------------------------------------------------------------------------------------------------------------------------------------------------------------------------------------------------------------------------------------------------------------------------------------------------------------------------------|

|                        |          |   |                                                                                                                   |         |                                                                                                                                                                                                                                                          |
|------------------------|----------|---|-------------------------------------------------------------------------------------------------------------------|---------|----------------------------------------------------------------------------------------------------------------------------------------------------------------------------------------------------------------------------------------------------------|
| Flavonoid biosynthesis | map00941 | 3 | ec:1.3.1.77 - reductase [(2R,3R)-flavan-3-ol-forming], ec:5.5.1.6 - isomerase, ec:2.1.1.104 - O-methyltransferase | 1, 1, 2 | vo_n2_Locus_20001_Transcript_1/1_Confidence_0.000_Length_1186, vo_c1_Locus_26362_Transcript_2/4_Confidence_0.667_Length_1019, vo_n2_Locus_30574_Transcript_4/4_Confidence_0.000_Length_969, vo_n2_Locus_30574_Transcript_3/4_Confidence_0.500_Length_827 |
|------------------------|----------|---|-------------------------------------------------------------------------------------------------------------------|---------|----------------------------------------------------------------------------------------------------------------------------------------------------------------------------------------------------------------------------------------------------------|

|                                              |          |   |                                                                                                                 |           |                                                                                                                                                                                                                                                                                                                                                                                                                                                                                                                                                                                                                                                                                                                                                                                                                                                                                                                                                                                                                                                                                                                                                                                                                                                                                                                                                                                                                                                        |
|----------------------------------------------|----------|---|-----------------------------------------------------------------------------------------------------------------|-----------|--------------------------------------------------------------------------------------------------------------------------------------------------------------------------------------------------------------------------------------------------------------------------------------------------------------------------------------------------------------------------------------------------------------------------------------------------------------------------------------------------------------------------------------------------------------------------------------------------------------------------------------------------------------------------------------------------------------------------------------------------------------------------------------------------------------------------------------------------------------------------------------------------------------------------------------------------------------------------------------------------------------------------------------------------------------------------------------------------------------------------------------------------------------------------------------------------------------------------------------------------------------------------------------------------------------------------------------------------------------------------------------------------------------------------------------------------------|
| Metabolism of xenobiotics by cytochrome P450 | map00980 | 3 | ec:2.5.1.18 - transferase, ec:1.2.1.5 - dehydrogenase [NAD(P)+], ec:2.4.1.17 - 1-naphthol glucuronyltransferase | 11, 2, 13 | vo_c3_Locus_7919_Transcript_7/13_Confidence_0.524_Length_1057, vo_c3_Locus_483_Transcript_11/12_Confidence_0.217_Length_759, vo_c2_Locus_8227_Transcript_3/3_Confidence_0.143_Length_1106, vo_c2_Locus_8227_Transcript_2/3_Confidence_0.571_Length_1060, vo_n2_Locus_34681_Transcript_5/6_Confidence_0.077_Length_2256, vo_c1_Locus_15275_Transcript_1/2_Confidence_0.333_Length_968, vo_n2_Locus_8358_Transcript_1/8_Confidence_0.444_Length_1513, vo_n2_Locus_2232_Transcript_6/7_Confidence_0.455_Length_2038, vo_c2_Locus_1790_Transcript_5/10_Confidence_0.474_Length_1047, vo_n2_Locus_8358_Transcript_6/8_Confidence_0.389_Length_1051, tri_n_comp38105_c0_seq1, tri_c_comp55340_c0_seq1, tri_n_comp58061_c0_seq1, tri_c_comp6209_c0_seq1, vo_c1_Locus_26340_Transcript_5/9_Confidence_0.600_Length_1699, tri_n_comp65990_c0_seq1, vo_n1_Locus_13372_Transcript_1/2_Confidence_0.333_Length_1687, vo_n2_Locus_34154_Transcript_3/3_Confidence_0.000_Length_2043, vo_n2_Locus_668_Transcript_17/17_Confidence_0.070_Length_2403, tri_c_comp58135_c0_seq1, vo_c3_Locus_16093_Transcript_1/1_Confidence_0.000_Length_1750, vo_n1_Locus_13372_Transcript_2/2_Confidence_0.000_Length_1314, vo_c2_Locus_24841_Transcript_3/3_Confidence_0.167_Length_3241, vo_n2_Locus_4774_Transcript_1/1_Confidence_0.000_Length_884, vo_c1_Locus_35615_Transcript_1/1_Confidence_0.000_Length_2075, vo_n1_Locus_15639_Transcript_1/1_Confidence_0.000_Length_1086 |
|----------------------------------------------|----------|---|-----------------------------------------------------------------------------------------------------------------|-----------|--------------------------------------------------------------------------------------------------------------------------------------------------------------------------------------------------------------------------------------------------------------------------------------------------------------------------------------------------------------------------------------------------------------------------------------------------------------------------------------------------------------------------------------------------------------------------------------------------------------------------------------------------------------------------------------------------------------------------------------------------------------------------------------------------------------------------------------------------------------------------------------------------------------------------------------------------------------------------------------------------------------------------------------------------------------------------------------------------------------------------------------------------------------------------------------------------------------------------------------------------------------------------------------------------------------------------------------------------------------------------------------------------------------------------------------------------------|

|                                    |          |   |                                                                                            |         |                                                                                                                                                                                                                                                                                                                      |
|------------------------------------|----------|---|--------------------------------------------------------------------------------------------|---------|----------------------------------------------------------------------------------------------------------------------------------------------------------------------------------------------------------------------------------------------------------------------------------------------------------------------|
| Polyketide sugar unit biosynthesis | map00523 | 3 | ec:1.1.1.133 - reductase,<br>ec:5.1.3.13 - 3,5-epimerase,<br>ec:4.2.1.46 - 4,6-dehydratase | 2, 1, 2 | vo_c2_Locus_1643_Transcript_1/1_Confidence_0.000_Length_1756, vo_c1_Locus_3806_Transcript_1/1_Confidence_0.000_Length_1482, vo_c2_Locus_1643_Transcript_1/1_Confidence_0.000_Length_1756, vo_c2_Locus_5377_Transcript_5/9_Confidence_0.150_Length_2142, vo_n1_Locus_5366_Transcript_4/4_Confidence_0.556_Length_1623 |
|------------------------------------|----------|---|--------------------------------------------------------------------------------------------|---------|----------------------------------------------------------------------------------------------------------------------------------------------------------------------------------------------------------------------------------------------------------------------------------------------------------------------|

|                       |          |   |                                                                                              |          |                                                                                                                                                                                                                                                                                                                                                                                                                                                                                                                                                                                                                                                                                                                                                                                                                                                                                                                                                                                                                                                                                                                                                                                                                                                                                                                                                                                                                                                                                                                                                                              |
|-----------------------|----------|---|----------------------------------------------------------------------------------------------|----------|------------------------------------------------------------------------------------------------------------------------------------------------------------------------------------------------------------------------------------------------------------------------------------------------------------------------------------------------------------------------------------------------------------------------------------------------------------------------------------------------------------------------------------------------------------------------------------------------------------------------------------------------------------------------------------------------------------------------------------------------------------------------------------------------------------------------------------------------------------------------------------------------------------------------------------------------------------------------------------------------------------------------------------------------------------------------------------------------------------------------------------------------------------------------------------------------------------------------------------------------------------------------------------------------------------------------------------------------------------------------------------------------------------------------------------------------------------------------------------------------------------------------------------------------------------------------------|
| Benzoate degradati on | map00362 | 3 | ec:2.3.1.9 - C-acetyltransferase,<br>ec:4.2.1.17 - hydratase,<br>ec:1.1.1.35 - dehydrogenase | 2, 7, 16 | vo_c1_Locus_2657_Transcript_1/1_Confidence_0.000_Length_1513, vo_n2_Locus_23058_Transcript_1/1_Confidence_0.000_Length_1342, vo_c2_Locus_2261_Transcript_1/2_Confidence_1.000_Length_2564, vo_c3_Locus_5948_Transcript_1/1_Confidence_0.000_Length_1027, vo_n2_Locus_16945_Transcript_1/3_Confidence_0.500_Length_1084, vo_c3_Locus_9925_Transcript_8/11_Confidence_0.263_Length_3550, vo_n1_Locus_11137_Transcript_5/5_Confidence_0.143_Length_2829, vo_n2_Locus_16945_Transcript_3/3_Confidence_0.000_Length_746, vo_n2_Locus_30747_Transcript_1/1_Confidence_0.000_Length_951, vo_c2_Locus_2261_Transcript_1/2_Confidence_1.000_Length_2564, vo_n1_Locus_9414_Transcript_8/13_Confidence_0.167_Length_606, vo_c1_Locus_40339_Transcript_1/1_Confidence_0.000_Length_1318, vo_c3_Locus_2031_Transcript_8/8_Confidence_0.111_Length_1389, vo_n1_Locus_11137_Transcript_5/5_Confidence_0.143_Length_2829, vo_c1_Locus_4675_Transcript_3/3_Confidence_0.200_Length_1348, vo_n2_Locus_30747_Transcript_1/1_Confidence_0.000_Length_951, vo_n2_Locus_636_Transcript_13/16_Confidence_0.222_Length_768, vo_c1_Locus_2815_Transcript_3/4_Confidence_0.200_Length_2244, vo_c3_Locus_9925_Transcript_8/11_Confidence_0.263_Length_3550, tri_n_comp42565_c0_seq1, vo_c2_Locus_189_Transcript_29/60_Confidence_0.015_Length_692, vo_n2_Locus_636_Transcript_16/16_Confidence_0.139_Length_616, vo_n2_Locus_636_Transcript_14/16_Confidence_0.222_Length_622, vo_n2_Locus_636_Transcript_5/16_Confidence_0.194_Length_591, vo_n2_Locus_636_Transcript_3/16_Confidence_0.306_Length_685 |
|-----------------------|----------|---|----------------------------------------------------------------------------------------------|----------|------------------------------------------------------------------------------------------------------------------------------------------------------------------------------------------------------------------------------------------------------------------------------------------------------------------------------------------------------------------------------------------------------------------------------------------------------------------------------------------------------------------------------------------------------------------------------------------------------------------------------------------------------------------------------------------------------------------------------------------------------------------------------------------------------------------------------------------------------------------------------------------------------------------------------------------------------------------------------------------------------------------------------------------------------------------------------------------------------------------------------------------------------------------------------------------------------------------------------------------------------------------------------------------------------------------------------------------------------------------------------------------------------------------------------------------------------------------------------------------------------------------------------------------------------------------------------|

|                                           |          |   |                                                                                                 |         |                                                                                                                                                                                                                                                                                                                                                                                                                                                                                                                                    |
|-------------------------------------------|----------|---|-------------------------------------------------------------------------------------------------|---------|------------------------------------------------------------------------------------------------------------------------------------------------------------------------------------------------------------------------------------------------------------------------------------------------------------------------------------------------------------------------------------------------------------------------------------------------------------------------------------------------------------------------------------|
| Chloroalkane and chloroalkene degradation | map00625 | 3 | ec:1.2.1.46 - dehydrogenase, ec:1.2.1.3 - dehydrogenase (NAD+), ec:3.3.2.10 - epoxide hydrolase | 2, 5, 3 | vo_c3_Locus_11405_Transcript_4/5_Confidence_0.429_Length_4324, vo_c3_Locus_15849_Transcript_1/1_Confidence_0.000_Length_1425, tri_c_comp55340_c0_seq1, vo_n1_Locus_19864_Transcript_2/2_Confidence_0.000_Length_2707, vo_c3_Locus_21741_Transcript_5/9_Confidence_0.583_Length_1757, vo_n3_Locus_25600_Transcript_5/6_Confidence_0.375_Length_1777, tri_n_comp58061_c0_seq1, vo_n2_Locus_16627_Transcript_1/2_Confidence_0.333_Length_2167, vo_n2_Locus_13706_Transcript_2/3_Confidence_0.750_Length_2463, tri_n_comp17047_c0_seq1 |
|-------------------------------------------|----------|---|-------------------------------------------------------------------------------------------------|---------|------------------------------------------------------------------------------------------------------------------------------------------------------------------------------------------------------------------------------------------------------------------------------------------------------------------------------------------------------------------------------------------------------------------------------------------------------------------------------------------------------------------------------------|

|                               |          |   |                                                                                                     |          |                                                                                                                                                                                                                                                                                                                                                                                                                                                                                                                                                                                                                                                                                                                                                                                                                                                                                                                                                                                         |
|-------------------------------|----------|---|-----------------------------------------------------------------------------------------------------|----------|-----------------------------------------------------------------------------------------------------------------------------------------------------------------------------------------------------------------------------------------------------------------------------------------------------------------------------------------------------------------------------------------------------------------------------------------------------------------------------------------------------------------------------------------------------------------------------------------------------------------------------------------------------------------------------------------------------------------------------------------------------------------------------------------------------------------------------------------------------------------------------------------------------------------------------------------------------------------------------------------|
| Glycosaminoglycan degradation | map00531 | 3 | ec:3.1.6.14 - chondroitinsulfatase, ec:3.2.1.52 - hexosaminidase, ec:3.2.1.23 - lactase (ambiguous) | 1, 13, 6 | tri_c_comp17496_c0_seq2, vo_c3_Locus_25279_Transcript_1/3_Confidence_0.500_Length_3460, tri_c_comp15706_c0_seq2, vo_n2_Locus_4554_Transcript_3/4_Confidence_0.444_Length_2253, vo_n2_Locus_3_Transcript_18735/24291_Confidence_0.000_Length_2121, vo_n2_Locus_4395_Transcript_3/3_Confidence_0.167_Length_2032, vo_c2_Locus_6406_Transcript_1/4_Confidence_0.333_Length_1666, vo_n1_Locus_14758_Transcript_1/2_Confidence_0.667_Length_1933, tri_n_comp35667_c0_seq1, vo_n2_Locus_4395_Transcript_1/3_Confidence_0.667_Length_1925, tri_c_comp32936_c0_seq1, tri_n_comp92955_c0_seq1, tri_n_comp30287_c0_seq1, vo_n2_Locus_4554_Transcript_4/4_Confidence_0.111_Length_2049, tri_c_comp12867_c0_seq1, vo_n2_Locus_1748_Transcript_2/3_Confidence_0.333_Length_4221, tri_n_comp70995_c0_seq1, vo_c2_Locus_26351_Transcript_1/2_Confidence_0.500_Length_4013, vo_c3_Locus_8047_Transcript_1/2_Confidence_0.333_Length_4021, vo_c3_Locus_32079_Transcript_2/2_Confidence_0.250_Length_2113 |
|-------------------------------|----------|---|-----------------------------------------------------------------------------------------------------|----------|-----------------------------------------------------------------------------------------------------------------------------------------------------------------------------------------------------------------------------------------------------------------------------------------------------------------------------------------------------------------------------------------------------------------------------------------------------------------------------------------------------------------------------------------------------------------------------------------------------------------------------------------------------------------------------------------------------------------------------------------------------------------------------------------------------------------------------------------------------------------------------------------------------------------------------------------------------------------------------------------|



|                                 |          |   |                                                                |          |                                                                                                                                                                                                                                                                                                                                                                                                                                                                                                                                                                                                                                                                                                                                                                                                                                                                                                                                                                                                                                                                                                                                                                                                                                                                                                                                                                                                                                                                                                                                                                                                                                                                                                                                                                                                                                                                                                                                                                                                                                                                                                                                                                                                                                                                                                                                                                                                                                                                                                                                                                                                                                                                                                                                                                                                                                                                                                                                                                                                                                                                                                                                                                                                                                                                                                                                                                                                                                                                                                                                                                                                                                                                                                                                                                                                                                                                                                                                                                                                                                                                                                                                  |
|---------------------------------|----------|---|----------------------------------------------------------------|----------|----------------------------------------------------------------------------------------------------------------------------------------------------------------------------------------------------------------------------------------------------------------------------------------------------------------------------------------------------------------------------------------------------------------------------------------------------------------------------------------------------------------------------------------------------------------------------------------------------------------------------------------------------------------------------------------------------------------------------------------------------------------------------------------------------------------------------------------------------------------------------------------------------------------------------------------------------------------------------------------------------------------------------------------------------------------------------------------------------------------------------------------------------------------------------------------------------------------------------------------------------------------------------------------------------------------------------------------------------------------------------------------------------------------------------------------------------------------------------------------------------------------------------------------------------------------------------------------------------------------------------------------------------------------------------------------------------------------------------------------------------------------------------------------------------------------------------------------------------------------------------------------------------------------------------------------------------------------------------------------------------------------------------------------------------------------------------------------------------------------------------------------------------------------------------------------------------------------------------------------------------------------------------------------------------------------------------------------------------------------------------------------------------------------------------------------------------------------------------------------------------------------------------------------------------------------------------------------------------------------------------------------------------------------------------------------------------------------------------------------------------------------------------------------------------------------------------------------------------------------------------------------------------------------------------------------------------------------------------------------------------------------------------------------------------------------------------------------------------------------------------------------------------------------------------------------------------------------------------------------------------------------------------------------------------------------------------------------------------------------------------------------------------------------------------------------------------------------------------------------------------------------------------------------------------------------------------------------------------------------------------------------------------------------------------------------------------------------------------------------------------------------------------------------------------------------------------------------------------------------------------------------------------------------------------------------------------------------------------------------------------------------------------------------------------------------------------------------------------------------------------------|
| alpha-Linolenic acid metabolism | map00592 | 3 | ec:3.1.1.4 - A2, ec:1.3.3.6 - oxidase, ec:4.2.1.17 - hydratase | 59, 2, 7 | <p>vo_n2_Locus_311_Transcript_71/114_Confidence_0.150_Length_1045, vo_c3_Locus_7729_Transcript_4/5_Confidence_0.167_Length_5654, vo_n1_Locus_443_Transcript_30/53_Confidence_0.193_Length_928, vo_c1_Locus_430_Transcript_20/51_Confidence_0.291_Length_976, vo_c2_Locus_601_Transcript_31/36_Confidence_0.229_Length_1002, vo_c2_Locus_5092_Transcript_6/14_Confidence_0.476_Length_1090, vo_c3_Locus_1328_Transcript_24/26_Confidence_0.245_Length_1398, vo_n2_Locus_311_Transcript_78/114_Confidence_0.093_Length_844, vo_c3_Locus_1273_Transcript_51/57_Confidence_0.108_Length_895, vo_c1_Locus_21671_Transcript_6/49_Confidence_0.021_Length_1919, vo_c3_Locus_1273_Transcript_50/57_Confidence_0.144_Length_1471, vo_n1_Locus_443_Transcript_24/53_Confidence_0.109_Length_905, vo_n2_Locus_311_Transcript_87/114_Confidence_0.061_Length_2919, vo_n3_Locus_407_Transcript_22/43_Confidence_0.292_Length_1222, tri_n_comp10070_c0_seq2, tri_c_comp22021_c0_seq1, vo_n1_Locus_443_Transcript_32/53_Confidence_0.252_Length_1164, vo_n3_Locus_407_Transcript_32/43_Confidence_0.283_Length_1271, vo_n1_Locus_443_Transcript_10/53_Confidence_0.193_Length_1076, vo_n3_Locus_407_Transcript_7/43_Confidence_0.132_Length_1778, vo_n2_Locus_311_Transcript_109/114_Confidence_0.117_Length_1018, vo_n3_Locus_407_Transcript_39/43_Confidence_0.236_Length_1222, vo_c3_Locus_15467_Transcript_2/2_Confidence_0.000_Length_1100, vo_n1_Locus_4880_Transcript_2/6_Confidence_0.333_Length_883, vo_n2_Locus_3013_Transcript_1/2_Confidence_0.750_Length_964, vo_n2_Locus_311_Transcript_112/114_Confidence_0.146_Length_1678, vo_c2_Locus_601_Transcript_27/36_Confidence_0.337_Length_991, vo_c2_Locus_601_Transcript_2/36_Confidence_0.133_Length_1744, vo_n1_Locus_443_Transcript_39/53_Confidence_0.210_Length_1938, vo_c3_Locus_15467_Transcript_1/2_Confidence_0.750_Length_988, vo_c1_Locus_430_Transcript_11/51_Confidence_0.145_Length_955, vo_c2_Locus_5092_Transcript_10/14_Confidence_0.429_Length_1495, vo_n2_Locus_21867_Transcript_2/5_Confidence_0.200_Length_5139, tri_n_comp20432_c0_seq6, vo_n2_Locus_311_Transcript_84/114_Confidence_0.117_Length_1124, vo_n2_Locus_311_Transcript_77/114_Confidence_0.134_Length_997, vo_n2_Locus_311_Transcript_90/114_Confidence_0.061_Length_1016, vo_c2_Locus_601_Transcript_11/36_Confidence_0.289_Length_1016, tri_n_comp20432_c0_seq2, vo_c1_Locus_430_Transcript_48/51_Confidence_0.227_Length_968, vo_n1_Locus_443_Transcript_17/53_Confidence_0.168_Length_1009, tri_c_comp8925_c1_seq1, vo_c2_Locus_601_Transcript_18/36_Confidence_0.265_Length_801, vo_c3_Locus_1273_Transcript_17/57_Confidence_0.050_Length_1126, vo_n3_Locus_407_Transcript_40/43_Confidence_0.217_Length_1200, vo_c2_Locus_601_Transcript_36/36_Confidence_0.217_Length_953, vo_n3_Locus_407_Transcript_8/43_Confidence_0.189_Length_1800, vo_c3_Locus_1273_Transcript_16/57_Confidence_0.079_Length_1101, tri_n_comp20662_c0_seq7, vo_n2_Locus_23060_Transcript_2/2_Confidence_0.000_Length_889, vo_c2_Locus_601_Transcript_15/36_Confidence_0.337_Length_815, vo_n1_Locus_4880_Transcript_4/6_Confidence_0.333_Length_1109, vo_n2_Locus_311_Transcript_3/114_Confidence_0.142_Length_866, tri_c_comp20860_c0_seq2, vo_n1_Locus_443_Transcript_8/53_Confidence_0.261_Length_1031, vo_n1_Locus_443_Transcript_49/53_Confidence_0.134_Length_862, vo_n3_Locus_407_Transcript_14/43_Confidence_0.142_Length_872, vo_c2_Locus_5609_Transcript_4/4_Confidence_0.250_Length_1105, vo_c3_Locus_17900_Transcript_1/1_Confidence_0.000_Length_966, tri_n_comp36670_c0_seq1, vo_n1_Locus_23625_Transcript_1/1_Confidence_0.000_Length_2286, vo_c2_Locus_2261_Transcript_1/2_Confidence_1.000_Length_2564, vo_c3_Locus_5948_Transcript_1/1_Confidence_0.000_Length_1027, vo_n2_Locus_16945_Transcript_1/3_Confidence_0.500_Length_1084, vo_c3_Locus_9925_Transcript_8/11_Confidence_0.263_Length_3550, vo_n1_Locus_11137_Transcript_5/5_Confidence_0.143_Length_2829, vo_n2_Locus_16945_Transcript_3/3_Confidence_0.000_Length_746, vo_n2_Locus_30747_Transcript_1/1_Confidence_0.000_Length_951</p> |
|---------------------------------|----------|---|----------------------------------------------------------------|----------|----------------------------------------------------------------------------------------------------------------------------------------------------------------------------------------------------------------------------------------------------------------------------------------------------------------------------------------------------------------------------------------------------------------------------------------------------------------------------------------------------------------------------------------------------------------------------------------------------------------------------------------------------------------------------------------------------------------------------------------------------------------------------------------------------------------------------------------------------------------------------------------------------------------------------------------------------------------------------------------------------------------------------------------------------------------------------------------------------------------------------------------------------------------------------------------------------------------------------------------------------------------------------------------------------------------------------------------------------------------------------------------------------------------------------------------------------------------------------------------------------------------------------------------------------------------------------------------------------------------------------------------------------------------------------------------------------------------------------------------------------------------------------------------------------------------------------------------------------------------------------------------------------------------------------------------------------------------------------------------------------------------------------------------------------------------------------------------------------------------------------------------------------------------------------------------------------------------------------------------------------------------------------------------------------------------------------------------------------------------------------------------------------------------------------------------------------------------------------------------------------------------------------------------------------------------------------------------------------------------------------------------------------------------------------------------------------------------------------------------------------------------------------------------------------------------------------------------------------------------------------------------------------------------------------------------------------------------------------------------------------------------------------------------------------------------------------------------------------------------------------------------------------------------------------------------------------------------------------------------------------------------------------------------------------------------------------------------------------------------------------------------------------------------------------------------------------------------------------------------------------------------------------------------------------------------------------------------------------------------------------------------------------------------------------------------------------------------------------------------------------------------------------------------------------------------------------------------------------------------------------------------------------------------------------------------------------------------------------------------------------------------------------------------------------------------------------------------------------------------------------------|

|                     |          |   |                                                                               |         |                                                                                                                                                        |
|---------------------|----------|---|-------------------------------------------------------------------------------|---------|--------------------------------------------------------------------------------------------------------------------------------------------------------|
| Folate biosynthesis | map00790 | 3 | ec:1.5.1.3 - reductase,<br>ec:6.3.2.17 - synthase,<br>ec:1.5.1.34 - reductase | 1, 1, 1 | vo_c2_Locus_1969_Transcript_1/2_Confidence_0.200_Length_1807, tri_c_comp50174_c0_seq1,<br>vo_c2_Locus_12026_Transcript_1/2_Confidence_1.000_Length_911 |
|---------------------|----------|---|-------------------------------------------------------------------------------|---------|--------------------------------------------------------------------------------------------------------------------------------------------------------|

|                                    |          |   |                                                                                  |         |                                                                                                                                                                                                                                                                                                                                                                         |
|------------------------------------|----------|---|----------------------------------------------------------------------------------|---------|-------------------------------------------------------------------------------------------------------------------------------------------------------------------------------------------------------------------------------------------------------------------------------------------------------------------------------------------------------------------------|
| Isoquinoline alkaloid biosynthesis | map00950 | 3 | ec:2.6.1.1 - transaminase, ec:1.14.16.2 - 3-monooxygenase, ec:1.4.3.21 - oxidase | 4, 2, 1 | vo_n1_Locus_3423_Transcript_2/4_Confidence_0.250_Length_1347, tri_n_comp27683_c0_seq1, vo_c1_Locus_3127_Transcript_1/1_Confidence_0.000_Length_1478, vo_n1_Locus_3423_Transcript_3/4_Confidence_0.250_Length_1416, vo_c2_Locus_16025_Transcript_2/3_Confidence_0.400_Length_2217, vo_n2_Locus_6286_Transcript_1/1_Confidence_0.000_Length_1634, tri_n_comp48625_c0_seq1 |
|------------------------------------|----------|---|----------------------------------------------------------------------------------|---------|-------------------------------------------------------------------------------------------------------------------------------------------------------------------------------------------------------------------------------------------------------------------------------------------------------------------------------------------------------------------------|

|                              |          |   |                                                                                                      |         |                                                                                                                                                                   |
|------------------------------|----------|---|------------------------------------------------------------------------------------------------------|---------|-------------------------------------------------------------------------------------------------------------------------------------------------------------------|
| Indole alkaloid biosynthesis | map00901 | 3 | ec:2.4.1.219 - glucosyltransferase, ec:3.2.1.125 - beta-glucosidase, ec:3.2.1.105 - beta-glucosidase | 1, 1, 3 | tri_n_comp70995_c0_seq1, tri_n_comp70995_c0_seq1, tri_c_comp12867_c0_seq1, tri_n_comp70995_c0_seq1, vo_c3_Locus_32079_Transcript_2/2_Confidence_0.250_Length_2113 |
|------------------------------|----------|---|------------------------------------------------------------------------------------------------------|---------|-------------------------------------------------------------------------------------------------------------------------------------------------------------------|

|                     |          |   |                                                          |      |                                                                                                                                                                                                                                                        |
|---------------------|----------|---|----------------------------------------------------------|------|--------------------------------------------------------------------------------------------------------------------------------------------------------------------------------------------------------------------------------------------------------|
| Styrene degradation | map00643 | 2 | ec:3.5.1.4 - acylamidase,<br>ec:3.5.5.1 - acetonitrilase | 3, 1 | vo_c3_Locus_1581_Transcript_3/3_Confidence_0.000_Length_1736, vo_c1_Locus_1298_Transcript_3/6_Confidence_0.625_Length_1775, vo_n2_Locus_157_Transcript_2/4_Confidence_0.286_Length_2059, vo_c2_Locus_31357_Transcript_6/7_Confidence_0.700_Length_1464 |
|---------------------|----------|---|----------------------------------------------------------|------|--------------------------------------------------------------------------------------------------------------------------------------------------------------------------------------------------------------------------------------------------------|

|                        |          |   |                                                              |        |                                                                                                                                                                                                                                                                                                                                                                                                                                                                                                                                                                                                                                                                                                                                                                                                                                                                                                                                                                                                                                                                                                                                                                                                                                                                                                                                                                                                                                                                                                                                                                                                                                                                                                                                                                                                                                                                                                                                                                                                                                                                                                                                                                                                                                                                                                                                                                                                                                                                                                                                                                                                                                                                                                                                                                                                                                                                                                                                                                                                                                                                                                                                                                                                                                                                                                                                                                                                                                                                                                                                                                                                                                                                                                                                                                                                                                                                                                                                                                                                                                                                                                                                                                                                                                                                                                                                                                                                                                                                                                                                                                                                                                                                                                                                                                                                                                                                                                                                                                                                                                                                                                                                                                                                                                                                                                                                                                                                                                                                                                                                                                  |
|------------------------|----------|---|--------------------------------------------------------------|--------|------------------------------------------------------------------------------------------------------------------------------------------------------------------------------------------------------------------------------------------------------------------------------------------------------------------------------------------------------------------------------------------------------------------------------------------------------------------------------------------------------------------------------------------------------------------------------------------------------------------------------------------------------------------------------------------------------------------------------------------------------------------------------------------------------------------------------------------------------------------------------------------------------------------------------------------------------------------------------------------------------------------------------------------------------------------------------------------------------------------------------------------------------------------------------------------------------------------------------------------------------------------------------------------------------------------------------------------------------------------------------------------------------------------------------------------------------------------------------------------------------------------------------------------------------------------------------------------------------------------------------------------------------------------------------------------------------------------------------------------------------------------------------------------------------------------------------------------------------------------------------------------------------------------------------------------------------------------------------------------------------------------------------------------------------------------------------------------------------------------------------------------------------------------------------------------------------------------------------------------------------------------------------------------------------------------------------------------------------------------------------------------------------------------------------------------------------------------------------------------------------------------------------------------------------------------------------------------------------------------------------------------------------------------------------------------------------------------------------------------------------------------------------------------------------------------------------------------------------------------------------------------------------------------------------------------------------------------------------------------------------------------------------------------------------------------------------------------------------------------------------------------------------------------------------------------------------------------------------------------------------------------------------------------------------------------------------------------------------------------------------------------------------------------------------------------------------------------------------------------------------------------------------------------------------------------------------------------------------------------------------------------------------------------------------------------------------------------------------------------------------------------------------------------------------------------------------------------------------------------------------------------------------------------------------------------------------------------------------------------------------------------------------------------------------------------------------------------------------------------------------------------------------------------------------------------------------------------------------------------------------------------------------------------------------------------------------------------------------------------------------------------------------------------------------------------------------------------------------------------------------------------------------------------------------------------------------------------------------------------------------------------------------------------------------------------------------------------------------------------------------------------------------------------------------------------------------------------------------------------------------------------------------------------------------------------------------------------------------------------------------------------------------------------------------------------------------------------------------------------------------------------------------------------------------------------------------------------------------------------------------------------------------------------------------------------------------------------------------------------------------------------------------------------------------------------------------------------------------------------------------------------------------------------------------------------|
| mTOR signaling pathway | map04150 | 2 | ec:2.7.11.11 - protein kinase, ec:2.7.11.24 - protein kinase | 67, 27 | <p>vo_c1_Locus_23955_Transcript_1/1_Confidence_0.000_Length_1690, vo_n2_Locus_1515_Transcript_10/24_Confidence_0.205_Length_885, tri_c_comp35466_c0_seq1, vo_c2_Locus_23610_Transcript_5/5_Confidence_0.222_Length_462, vo_n2_Locus_19015_Transcript_1/1_Confidence_0.000_Length_2784, vo_c3_Locus_12823_Transcript_7/11_Confidence_0.150_Length_1099, vo_n2_Locus_18927_Transcript_1/1_Confidence_0.000_Length_2769, vo_c1_Locus_3372_Transcript_11/12_Confidence_0.350_Length_1415, vo_c1_Locus_6709_Transcript_7/10_Confidence_0.500_Length_1389, vo_c3_Locus_1810_Transcript_8/22_Confidence_0.262_Length_1483, vo_n1_Locus_1051_Transcript_2/7_Confidence_0.556_Length_3162, vo_n2_Locus_1426_Transcript_24/28_Confidence_0.304_Length_1547, vo_c1_Locus_10052_Transcript_5/5_Confidence_0.100_Length_3554, vo_n2_Locus_10323_Transcript_2/2_Confidence_0.000_Length_2787, vo_n2_Locus_3_Transcript_17800/24291_Confidence_0.000_Length_5238, vo_n3_Locus_1253_Transcript_1/2_Confidence_0.500_Length_1626, vo_n1_Locus_8984_Transcript_1/1_Confidence_0.000_Length_2588, tri_n_comp95070_c0_seq1, vo_n1_Locus_842_Transcript_34/37_Confidence_0.203_Length_1893, vo_n3_Locus_1253_Transcript_2/2_Confidence_0.000_Length_1587, tri_n_comp17425_c0_seq2, vo_c3_Locus_4005_Transcript_5/6_Confidence_0.167_Length_1517, vo_c2_Locus_10357_Transcript_15/15_Confidence_0.045_Length_698, vo_c3_Locus_12823_Transcript_5/11_Confidence_0.200_Length_1070, vo_c2_Locus_4581_Transcript_3/8_Confidence_0.684_Length_1578, vo_c3_Locus_1810_Transcript_17/22_Confidence_0.214_Length_1421, tri_c_comp62706_c0_seq1, vo_n2_Locus_18804_Transcript_2/2_Confidence_0.000_Length_2997, vo_n1_Locus_14687_Transcript_3/3_Confidence_0.200_Length_1029, vo_c1_Locus_7903_Transcript_2/3_Confidence_0.750_Length_3162, vo_n2_Locus_3054_Transcript_2/3_Confidence_0.333_Length_3045, vo_c2_Locus_1080_Transcript_3/21_Confidence_0.207_Length_1702, vo_n2_Locus_3_Transcript_19709/24291_Confidence_0.000_Length_2745, tri_c_comp18638_c0_seq3, tri_c_comp12452_c0_seq2, vo_c1_Locus_6709_Transcript_2/10_Confidence_0.444_Length_1193, vo_c2_Locus_13626_Transcript_1/1_Confidence_0.500_Length_2755, vo_n2_Locus_3053_Transcript_1/1_Confidence_0.000_Length_2618, vo_n3_Locus_8058_Transcript_1/1_Confidence_0.000_Length_2950, tri_n_comp12148_c0_seq1, vo_c1_Locus_6477_Transcript_5/9_Confidence_0.235_Length_1167, vo_n2_Locus_1515_Transcript_15/24_Confidence_0.077_Length_1136, vo_c3_Locus_10023_Transcript_2/6_Confidence_0.125_Length_1290, vo_n2_Locus_1426_Transcript_22/28_Confidence_0.304_Length_1443, tri_n_comp11583_c0_seq1, vo_n1_Locus_1576_Transcript_8/13_Confidence_0.160_Length_2301, vo_n2_Locus_19434_Transcript_1/2_Confidence_0.333_Length_3274, vo_c1_Locus_21343_Transcript_3/9_Confidence_0.600_Length_2048, vo_n2_Locus_297_Transcript_2/5_Confidence_0.636_Length_1679, vo_c3_Locus_8311_Transcript_1/2_Confidence_0.333_Length_2973, vo_n1_Locus_14424_Transcript_4/4_Confidence_0.143_Length_7320, vo_n3_Locus_877_Transcript_3/5_Confidence_0.400_Length_1624, vo_c1_Locus_4147_Transcript_11/12_Confidence_0.278_Length_2504, vo_c2_Locus_11635_Transcript_2/4_Confidence_0.167_Length_3028, vo_c3_Locus_1810_Transcript_9/22_Confidence_0.262_Length_1447, tri_c_comp47538_c0_seq1, vo_c1_Locus_4147_Transcript_10/12_Confidence_0.222_Length_2379, vo_c1_Locus_6811_Transcript_7/8_Confidence_0.364_Length_589, vo_c1_Locus_6709_Transcript_9/10_Confidence_0.278_Length_1468, vo_c2_Locus_1080_Transcript_4/21_Confidence_0.241_Length_1741, vo_n2_Locus_5856_Transcript_8/8_Confidence_0.000_Length_3276, vo_c2_Locus_1080_Transcript_8/21_Confidence_0.138_Length_1077, vo_n1_Locus_842_Transcript_11/37_Confidence_0.188_Length_2091, vo_n2_Locus_901_Transcript_1/95_Confidence_0.023_Length_1512, vo_n2_Locus_1426_Transcript_12/28_Confidence_0.370_Length_1887, vo_n2_Locus_1426_Transcript_16/28_Confidence_0.326_Length_1443, vo_c3_Locus_1810_Transcript_5/22_Confidence_0.310_Length_1343, vo_c3_Locus_4105_Transcript_3/6_Confidence_0.417_Length_1637, vo_c1_Locus_6691_Transcript_2/2_Confidence_0.250_Length_1740, vo_c1_Locus_23003_Transcript_4/8_Confidence_0.667_Length_1396, vo_n3_Locus_8055_Transcript_2/5_Confidence_0.400_Length_1985, vo_n1_Locus_4081_Transcript_2/4_Confidence_0.500_Length_1840, tri_n_comp30548_c0_seq1, vo_c1_Locus_23003_Transcript_3/8_Confidence_0.667_Length_1323, tri_c_comp34910_c0_seq1, vo_c1_Locus_13237_Transcript_1/9_Confidence_0.176_Length_513, vo_c3_Locus_19377_Transcript_2/2_Confidence_0.000_Length_1548, tri_c_comp40129_c0_seq1, vo_n2_Locus_729_Transcript_27/52_Confidence_0.360_Length_2376, vo_n2_Locus_5122_Transcript_1/1_Confidence_0.333_Length_1529, vo_c2_Locus_15642_Transcript_1/1_Confidence_0.000_Length_1576, tri_c_comp34272_c0_seq1, vo_c2_Locus_8726_Transcript_6/6_Confidence_0.040_Length_1556, tri_c_comp31416_c0_seq1, tri_n_comp13449_c0_seq1, vo_c3_Locus_2111_Transcript_2/6_Confidence_0.625_Length_1653, vo_n1_Locus_16685_Transcript_3/3_Confidence_0.286_Length_1498, vo_n1_Locus_4081_Transcript_1/4_Confidence_0.667_Length_1798, vo_c3_Locus_4105_Transcript_4/6_Confidence_0.250_Length_1291, vo_c1_Locus_12069_Transcript_1/3_Confidence_0.667_Length_1533, vo_c1_Locus_4044_Transcript_3/3_Confidence_0.854_Length_1776, vo_c3_Locus_17929_Transcript_1/2_Confidence_0.333_Length_490, vo_n1_Locus_16685_Transcript_1/3_Confidence_0.429_Length_1465, vo_n2_Locus_729_Transcript_30/52_Confidence_0.360_Length_2337</p> |
|------------------------|----------|---|--------------------------------------------------------------|--------|------------------------------------------------------------------------------------------------------------------------------------------------------------------------------------------------------------------------------------------------------------------------------------------------------------------------------------------------------------------------------------------------------------------------------------------------------------------------------------------------------------------------------------------------------------------------------------------------------------------------------------------------------------------------------------------------------------------------------------------------------------------------------------------------------------------------------------------------------------------------------------------------------------------------------------------------------------------------------------------------------------------------------------------------------------------------------------------------------------------------------------------------------------------------------------------------------------------------------------------------------------------------------------------------------------------------------------------------------------------------------------------------------------------------------------------------------------------------------------------------------------------------------------------------------------------------------------------------------------------------------------------------------------------------------------------------------------------------------------------------------------------------------------------------------------------------------------------------------------------------------------------------------------------------------------------------------------------------------------------------------------------------------------------------------------------------------------------------------------------------------------------------------------------------------------------------------------------------------------------------------------------------------------------------------------------------------------------------------------------------------------------------------------------------------------------------------------------------------------------------------------------------------------------------------------------------------------------------------------------------------------------------------------------------------------------------------------------------------------------------------------------------------------------------------------------------------------------------------------------------------------------------------------------------------------------------------------------------------------------------------------------------------------------------------------------------------------------------------------------------------------------------------------------------------------------------------------------------------------------------------------------------------------------------------------------------------------------------------------------------------------------------------------------------------------------------------------------------------------------------------------------------------------------------------------------------------------------------------------------------------------------------------------------------------------------------------------------------------------------------------------------------------------------------------------------------------------------------------------------------------------------------------------------------------------------------------------------------------------------------------------------------------------------------------------------------------------------------------------------------------------------------------------------------------------------------------------------------------------------------------------------------------------------------------------------------------------------------------------------------------------------------------------------------------------------------------------------------------------------------------------------------------------------------------------------------------------------------------------------------------------------------------------------------------------------------------------------------------------------------------------------------------------------------------------------------------------------------------------------------------------------------------------------------------------------------------------------------------------------------------------------------------------------------------------------------------------------------------------------------------------------------------------------------------------------------------------------------------------------------------------------------------------------------------------------------------------------------------------------------------------------------------------------------------------------------------------------------------------------------------------------------------------------------------------------|

|                         |          |   |                                                           |      |                                                                                                                                                                                                                                                                                  |
|-------------------------|----------|---|-----------------------------------------------------------|------|----------------------------------------------------------------------------------------------------------------------------------------------------------------------------------------------------------------------------------------------------------------------------------|
| Novobiocin biosynthesis | map00401 | 2 | ec:2.6.1.1 - transaminase,<br>ec:1.3.1.12 - dehydrogenase | 4, 1 | vo_n1_Locus_3423_Transcript_2/4_Confidence_0.250_Length_1347, tri_n_comp27683_c0_seq1, vo_c1_Locus_3127_Transcript_1/1_Confidence_0.000_Length_1478, vo_n1_Locus_3423_Transcript_3/4_Confidence_0.250_Length_1416, vo_c2_Locus_15226_Transcript_2/2_Confidence_0.500_Length_2141 |
|-------------------------|----------|---|-----------------------------------------------------------|------|----------------------------------------------------------------------------------------------------------------------------------------------------------------------------------------------------------------------------------------------------------------------------------|

|                                                                           |          |   |                                                     |      |                                                                                                                                                                                                                                                  |
|---------------------------------------------------------------------------|----------|---|-----------------------------------------------------|------|--------------------------------------------------------------------------------------------------------------------------------------------------------------------------------------------------------------------------------------------------|
| Tropane,<br>piperidine<br>and<br>pyridine<br>alkaloid<br>biosynthe<br>sis | map00960 | 2 | ec:2.6.1.1 - transaminase,<br>ec:1.4.3.21 - oxidase | 4, 1 | vo_n1_Locus_3423_Transcript_2/4_Confidence_0.250_Length_1347, tri_n_comp27683_c0_seq1,<br>vo_c1_Locus_3127_Transcript_1/1_Confidence_0.000_Length_1478, vo_n1_Locus_3423_Transcript_3/4_Confidence_0.250_Length_1416,<br>tri_n_comp48625_c0_seq1 |
|---------------------------------------------------------------------------|----------|---|-----------------------------------------------------|------|--------------------------------------------------------------------------------------------------------------------------------------------------------------------------------------------------------------------------------------------------|



|                                                     |          |   |                                                                                         |      |                                                                                                                                                                                                                                                                                                             |
|-----------------------------------------------------|----------|---|-----------------------------------------------------------------------------------------|------|-------------------------------------------------------------------------------------------------------------------------------------------------------------------------------------------------------------------------------------------------------------------------------------------------------------|
| Glycosaminoglycan biosynthesis - keratan sulfate    | map00533 | 2 | ec:2.4.1.38 - beta-1,4-galactosyltransferase, ec:2.4.99.4 - alpha-2,3-sialyltransferase | 2, 4 | tri_c_comp20165_c0_seq7, tri_c_comp20165_c0_seq3, vo_c2_Locus_30916_Transcript_1/3_Confidence_0.600_Length_1243, vo_n2_Locus_15072_Transcript_3/7_Confidence_0.429_Length_1062, vo_n2_Locus_15072_Transcript_4/7_Confidence_0.286_Length_628, vo_c1_Locus_6341_Transcript_8/13_Confidence_0.611_Length_1057 |
| Ubiquinone and other terpenoid-quinone biosynthesis | map00130 | 2 | ec:2.2.1.9 - synthase, ec:1.6.5.2 - dehydrogenase (quinone)                             | 1, 1 | tri_n_comp40118_c0_seq1, vo_n1_Locus_3253_Transcript_7/7_Confidence_0.000_Length_907                                                                                                                                                                                                                        |

|                                      |          |   |                                                          |       |                                                                                                                                                                                                                                                                                                                                                                                                                                                                                                                                                                                                                                                                                                                                                                                                                                                                                                                                                                                                                                                                                                                                                                                                                                                                                                                                                                                                                                                                                                           |
|--------------------------------------|----------|---|----------------------------------------------------------|-------|-----------------------------------------------------------------------------------------------------------------------------------------------------------------------------------------------------------------------------------------------------------------------------------------------------------------------------------------------------------------------------------------------------------------------------------------------------------------------------------------------------------------------------------------------------------------------------------------------------------------------------------------------------------------------------------------------------------------------------------------------------------------------------------------------------------------------------------------------------------------------------------------------------------------------------------------------------------------------------------------------------------------------------------------------------------------------------------------------------------------------------------------------------------------------------------------------------------------------------------------------------------------------------------------------------------------------------------------------------------------------------------------------------------------------------------------------------------------------------------------------------------|
| Primary<br>bile acid<br>biosynthesis | map00120 | 2 | ec:4.2.1.107 - hydratase,<br>ec:1.1.1.35 - dehydrogenase | 8, 16 | vo_n1_Locus_9414_Transcript_8/13_Confidence_0.167_Length_606, vo_c2_Locus_189_Transcript_29/60_Confidence_0.015_Length_692, vo_c3_Locus_2031_Transcript_8/8_Confidence_0.111_Length_1389, vo_n2_Locus_636_Transcript_16/16_Confidence_0.139_Length_616, vo_n2_Locus_636_Transcript_14/16_Confidence_0.222_Length_622, vo_n2_Locus_636_Transcript_5/16_Confidence_0.194_Length_591, vo_n2_Locus_30747_Transcript_1/1_Confidence_0.000_Length_951, vo_n2_Locus_636_Transcript_13/16_Confidence_0.222_Length_768, vo_c2_Locus_2261_Transcript_1/2_Confidence_1.000_Length_2564, vo_n1_Locus_9414_Transcript_8/13_Confidence_0.167_Length_606, vo_c1_Locus_40339_Transcript_1/1_Confidence_0.000_Length_1318, vo_c3_Locus_2031_Transcript_8/8_Confidence_0.111_Length_1389, vo_n1_Locus_11137_Transcript_5/5_Confidence_0.143_Length_2829, vo_c1_Locus_4675_Transcript_3/3_Confidence_0.200_Length_1348, vo_n2_Locus_30747_Transcript_1/1_Confidence_0.000_Length_951, vo_n2_Locus_636_Transcript_13/16_Confidence_0.222_Length_768, vo_c1_Locus_2815_Transcript_3/4_Confidence_0.200_Length_2244, vo_c3_Locus_9925_Transcript_8/11_Confidence_0.263_Length_3550, tri_n_comp42565_c0_seq1, vo_c2_Locus_189_Transcript_29/60_Confidence_0.015_Length_692, vo_n2_Locus_636_Transcript_16/16_Confidence_0.139_Length_616, vo_n2_Locus_636_Transcript_14/16_Confidence_0.222_Length_622, vo_n2_Locus_636_Transcript_5/16_Confidence_0.194_Length_591, vo_n2_Locus_636_Transcript_3/16_Confidence_0.306_Length_685 |
|--------------------------------------|----------|---|----------------------------------------------------------|-------|-----------------------------------------------------------------------------------------------------------------------------------------------------------------------------------------------------------------------------------------------------------------------------------------------------------------------------------------------------------------------------------------------------------------------------------------------------------------------------------------------------------------------------------------------------------------------------------------------------------------------------------------------------------------------------------------------------------------------------------------------------------------------------------------------------------------------------------------------------------------------------------------------------------------------------------------------------------------------------------------------------------------------------------------------------------------------------------------------------------------------------------------------------------------------------------------------------------------------------------------------------------------------------------------------------------------------------------------------------------------------------------------------------------------------------------------------------------------------------------------------------------|

|                                  |          |   |                                                                                            |       |                                                                                                                                                                                                                                                                                                                                                                                                                                                                                                                                                                                                                                                                                                                                                                                                                                                                                    |
|----------------------------------|----------|---|--------------------------------------------------------------------------------------------|-------|------------------------------------------------------------------------------------------------------------------------------------------------------------------------------------------------------------------------------------------------------------------------------------------------------------------------------------------------------------------------------------------------------------------------------------------------------------------------------------------------------------------------------------------------------------------------------------------------------------------------------------------------------------------------------------------------------------------------------------------------------------------------------------------------------------------------------------------------------------------------------------|
| Mucin type O-glycan biosynthesis | map00512 | 2 | ec:2.4.1.41 - N-acetylgalactosaminyltransferase, ec:2.4.99.4 - alpha-2,3-sialyltransferase | 12, 4 | tri_c_comp18925_c0_seq4, vo_c3_Locus_31796_Transcript_4/4_Confidence_0.000_Length_1398, tri_c_comp36211_c0_seq1, vo_n1_Locus_3055_Transcript_5/6_Confidence_0.083_Length_2608, vo_c2_Locus_26791_Transcript_1/1_Confidence_0.000_Length_2049, vo_c2_Locus_14086_Transcript_1/1_Confidence_0.000_Length_2122, vo_n2_Locus_10812_Transcript_5/6_Confidence_0.625_Length_2773, vo_n1_Locus_26507_Transcript_2/2_Confidence_0.000_Length_1797, tri_c_comp4176_c0_seq2, tri_c_comp65027_c0_seq1, vo_c1_Locus_3502_Transcript_2/4_Confidence_0.667_Length_1718, vo_n2_Locus_24382_Transcript_1/1_Confidence_0.000_Length_2045, vo_c2_Locus_30916_Transcript_1/3_Confidence_0.600_Length_1243, vo_n2_Locus_15072_Transcript_3/7_Confidence_0.429_Length_1062, vo_n2_Locus_15072_Transcript_4/7_Confidence_0.286_Length_628, vo_c1_Locus_6341_Transcript_8/13_Confidence_0.611_Length_1057 |
|----------------------------------|----------|---|--------------------------------------------------------------------------------------------|-------|------------------------------------------------------------------------------------------------------------------------------------------------------------------------------------------------------------------------------------------------------------------------------------------------------------------------------------------------------------------------------------------------------------------------------------------------------------------------------------------------------------------------------------------------------------------------------------------------------------------------------------------------------------------------------------------------------------------------------------------------------------------------------------------------------------------------------------------------------------------------------------|

|                             |          |   |                                                         |       |                                                                                                                                                                                                                                                                                                                                                                                                                                                                                                                                                                                                                                                                                                                                                                                                                                                                                                                                                                                                                                                                                                                                                                                                                                                                                                                                                                                                                                                                                  |
|-----------------------------|----------|---|---------------------------------------------------------|-------|----------------------------------------------------------------------------------------------------------------------------------------------------------------------------------------------------------------------------------------------------------------------------------------------------------------------------------------------------------------------------------------------------------------------------------------------------------------------------------------------------------------------------------------------------------------------------------------------------------------------------------------------------------------------------------------------------------------------------------------------------------------------------------------------------------------------------------------------------------------------------------------------------------------------------------------------------------------------------------------------------------------------------------------------------------------------------------------------------------------------------------------------------------------------------------------------------------------------------------------------------------------------------------------------------------------------------------------------------------------------------------------------------------------------------------------------------------------------------------|
| Geraniol<br>degradati<br>on | map00281 | 2 | ec:4.2.1.17 - hydratase,<br>ec:1.1.1.35 - dehydrogenase | 7, 16 | vo_c2_Locus_2261_Transcript_1/2_Confidence_1.000_Length_2564, vo_c3_Locus_5948_Transcript_1/1_Confidence_0.000_Length_1027,<br>vo_n2_Locus_16945_Transcript_1/3_Confidence_0.500_Length_1084, vo_c3_Locus_9925_Transcript_8/11_Confidence_0.263_Length_3550,<br>vo_n1_Locus_11137_Transcript_5/5_Confidence_0.143_Length_2829, vo_n2_Locus_16945_Transcript_3/3_Confidence_0.000_Length_746,<br>vo_n2_Locus_30747_Transcript_1/1_Confidence_0.000_Length_951, vo_c2_Locus_2261_Transcript_1/2_Confidence_1.000_Length_2564,<br>vo_n1_Locus_9414_Transcript_8/13_Confidence_0.167_Length_606, vo_c1_Locus_40339_Transcript_1/1_Confidence_0.000_Length_1318,<br>vo_c3_Locus_2031_Transcript_8/8_Confidence_0.111_Length_1389, vo_n1_Locus_11137_Transcript_5/5_Confidence_0.143_Length_2829,<br>vo_c1_Locus_4675_Transcript_3/3_Confidence_0.200_Length_1348, vo_n2_Locus_30747_Transcript_1/1_Confidence_0.000_Length_951,<br>vo_n2_Locus_636_Transcript_13/16_Confidence_0.222_Length_768, vo_c1_Locus_2815_Transcript_3/4_Confidence_0.200_Length_2244,<br>vo_c3_Locus_9925_Transcript_8/11_Confidence_0.263_Length_3550, tri_n_comp42565_c0_seq1,<br>vo_c2_Locus_189_Transcript_29/60_Confidence_0.015_Length_692, vo_n2_Locus_636_Transcript_16/16_Confidence_0.139_Length_616,<br>vo_n2_Locus_636_Transcript_14/16_Confidence_0.222_Length_622, vo_n2_Locus_636_Transcript_5/16_Confidence_0.194_Length_591,<br>vo_n2_Locus_636_Transcript_3/16_Confidence_0.306_Length_685 |
|-----------------------------|----------|---|---------------------------------------------------------|-------|----------------------------------------------------------------------------------------------------------------------------------------------------------------------------------------------------------------------------------------------------------------------------------------------------------------------------------------------------------------------------------------------------------------------------------------------------------------------------------------------------------------------------------------------------------------------------------------------------------------------------------------------------------------------------------------------------------------------------------------------------------------------------------------------------------------------------------------------------------------------------------------------------------------------------------------------------------------------------------------------------------------------------------------------------------------------------------------------------------------------------------------------------------------------------------------------------------------------------------------------------------------------------------------------------------------------------------------------------------------------------------------------------------------------------------------------------------------------------------|

|                                 |          |   |                                                            |      |                                                                                                                                                                                                                                                                                                                                                                                                                                                                                                                                                                                                                                                                                                    |
|---------------------------------|----------|---|------------------------------------------------------------|------|----------------------------------------------------------------------------------------------------------------------------------------------------------------------------------------------------------------------------------------------------------------------------------------------------------------------------------------------------------------------------------------------------------------------------------------------------------------------------------------------------------------------------------------------------------------------------------------------------------------------------------------------------------------------------------------------------|
| Limonene and pinene degradation | map00903 | 2 | ec:1.2.1.3 - dehydrogenase (NAD+), ec:4.2.1.17 - hydratase | 5, 7 | tri_c_comp55340_c0_seq1, vo_n1_Locus_19864_Transcript_2/2_Confidence_0.000_Length_2707, vo_c3_Locus_21741_Transcript_5/9_Confidence_0.583_Length_1757, vo_n3_Locus_25600_Transcript_5/6_Confidence_0.375_Length_1777, tri_n_comp58061_c0_seq1, vo_c2_Locus_2261_Transcript_1/2_Confidence_1.000_Length_2564, vo_c3_Locus_5948_Transcript_1/1_Confidence_0.000_Length_1027, vo_n2_Locus_16945_Transcript_1/3_Confidence_0.500_Length_1084, vo_c3_Locus_9925_Transcript_8/11_Confidence_0.263_Length_3550, vo_n1_Locus_11137_Transcript_5/5_Confidence_0.143_Length_2829, vo_n2_Locus_16945_Transcript_3/3_Confidence_0.000_Length_746, vo_n2_Locus_30747_Transcript_1/1_Confidence_0.000_Length_951 |
|---------------------------------|----------|---|------------------------------------------------------------|------|----------------------------------------------------------------------------------------------------------------------------------------------------------------------------------------------------------------------------------------------------------------------------------------------------------------------------------------------------------------------------------------------------------------------------------------------------------------------------------------------------------------------------------------------------------------------------------------------------------------------------------------------------------------------------------------------------|

|                                                            |          |   |                                                                                                       |      |                                                                                                                                                                                                                                                            |
|------------------------------------------------------------|----------|---|-------------------------------------------------------------------------------------------------------|------|------------------------------------------------------------------------------------------------------------------------------------------------------------------------------------------------------------------------------------------------------------|
| Glycosaminoglycan biosynthesis - heparan sulfate / heparin | map00534 | 2 | ec:2.4.1.224 - 4-alpha-N-acetylglucosaminyltransferase, ec:2.4.1.225 - 4-beta-glucuronosyltransferase | 2, 2 | vo_c1_Locus_23908_Transcript_1/1_Confidence_0.000_Length_2129, vo_c2_Locus_13150_Transcript_3/3_Confidence_0.000_Length_2135, vo_c1_Locus_23908_Transcript_1/1_Confidence_0.000_Length_2129, vo_c2_Locus_13150_Transcript_3/3_Confidence_0.000_Length_2135 |
|------------------------------------------------------------|----------|---|-------------------------------------------------------------------------------------------------------|------|------------------------------------------------------------------------------------------------------------------------------------------------------------------------------------------------------------------------------------------------------------|

|                    |          |   |                                                     |        |                                                                                                                                                                                                                                                                                                                                                                                                                                                                                                                                                                                                                                                                                                                                                                                                                                                                                                                                                                                                                                                                                                                                                                                                                                                                                                                                                                                                                                                                                                                                                                                                                                                                                                                                                                                                                                                                                                                                                                                                                                                                                                                                                                     |
|--------------------|----------|---|-----------------------------------------------------|--------|---------------------------------------------------------------------------------------------------------------------------------------------------------------------------------------------------------------------------------------------------------------------------------------------------------------------------------------------------------------------------------------------------------------------------------------------------------------------------------------------------------------------------------------------------------------------------------------------------------------------------------------------------------------------------------------------------------------------------------------------------------------------------------------------------------------------------------------------------------------------------------------------------------------------------------------------------------------------------------------------------------------------------------------------------------------------------------------------------------------------------------------------------------------------------------------------------------------------------------------------------------------------------------------------------------------------------------------------------------------------------------------------------------------------------------------------------------------------------------------------------------------------------------------------------------------------------------------------------------------------------------------------------------------------------------------------------------------------------------------------------------------------------------------------------------------------------------------------------------------------------------------------------------------------------------------------------------------------------------------------------------------------------------------------------------------------------------------------------------------------------------------------------------------------|
| Photosynt<br>hesis | map00195 | 2 | ec:1.18.1.2 - reductase,<br>ec:1.10.9.1 - reductase | 22, 11 | vo_c3_Locus_6967_Transcript_1/1_Confidence_0.000_Length_1495, vo_c3_Locus_348_Transcript_22/28_Confidence_0.452_Length_1847,<br>vo_n2_Locus_1693_Transcript_26/55_Confidence_0.182_Length_1396, vo_n2_Locus_1693_Transcript_37/55_Confidence_0.121_Length_1392,<br>vo_n2_Locus_1693_Transcript_55/55_Confidence_0.101_Length_1537, vo_n1_Locus_1081_Transcript_31/59_Confidence_0.333_Length_2089,<br>vo_n1_Locus_1081_Transcript_52/59_Confidence_0.126_Length_1389, vo_n1_Locus_1081_Transcript_30/59_Confidence_0.379_Length_2044,<br>vo_n1_Locus_3201_Transcript_21/28_Confidence_0.421_Length_1518, vo_c3_Locus_348_Transcript_5/28_Confidence_0.429_Length_1341,<br>vo_n2_Locus_1693_Transcript_27/55_Confidence_0.232_Length_1396, vo_n1_Locus_1081_Transcript_55/59_Confidence_0.241_Length_1447,<br>vo_c1_Locus_505_Transcript_6/25_Confidence_0.667_Length_1385, vo_n1_Locus_3201_Transcript_11/28_Confidence_0.447_Length_1802,<br>vo_c2_Locus_2807_Transcript_18/26_Confidence_0.538_Length_1367, vo_c2_Locus_2807_Transcript_6/26_Confidence_0.538_Length_1417,<br>vo_n1_Locus_1081_Transcript_46/59_Confidence_0.299_Length_1475, vo_n1_Locus_1081_Transcript_34/59_Confidence_0.241_Length_1734,<br>vo_n2_Locus_1693_Transcript_15/55_Confidence_0.222_Length_4326, tri_c_comp19032_c0_seq2,<br>vo_n1_Locus_1081_Transcript_39/59_Confidence_0.333_Length_1640, vo_n2_Locus_1693_Transcript_12/55_Confidence_0.222_Length_1409,<br>vo_c2_Locus_5878_Transcript_5/7_Confidence_0.333_Length_1049, vo_c1_Locus_754_Transcript_8/11_Confidence_0.200_Length_971,<br>vo_c1_Locus_754_Transcript_9/11_Confidence_0.200_Length_2339, vo_c1_Locus_8997_Transcript_2/2_Confidence_0.000_Length_877,<br>vo_c3_Locus_6650_Transcript_4/8_Confidence_0.308_Length_1102, vo_c1_Locus_754_Transcript_5/11_Confidence_0.300_Length_1714,<br>vo_c2_Locus_5878_Transcript_3/7_Confidence_0.444_Length_1038, vo_n1_Locus_1379_Transcript_7/9_Confidence_0.154_Length_925,<br>vo_c2_Locus_455_Transcript_3/3_Confidence_0.000_Length_684, vo_n3_Locus_3061_Transcript_4/7_Confidence_0.417_Length_922,<br>vo_c1_Locus_754_Transcript_7/11_Confidence_0.250_Length_1706 |
|--------------------|----------|---|-----------------------------------------------------|--------|---------------------------------------------------------------------------------------------------------------------------------------------------------------------------------------------------------------------------------------------------------------------------------------------------------------------------------------------------------------------------------------------------------------------------------------------------------------------------------------------------------------------------------------------------------------------------------------------------------------------------------------------------------------------------------------------------------------------------------------------------------------------------------------------------------------------------------------------------------------------------------------------------------------------------------------------------------------------------------------------------------------------------------------------------------------------------------------------------------------------------------------------------------------------------------------------------------------------------------------------------------------------------------------------------------------------------------------------------------------------------------------------------------------------------------------------------------------------------------------------------------------------------------------------------------------------------------------------------------------------------------------------------------------------------------------------------------------------------------------------------------------------------------------------------------------------------------------------------------------------------------------------------------------------------------------------------------------------------------------------------------------------------------------------------------------------------------------------------------------------------------------------------------------------|

|                     |          |   |                                                                                  |      |                                                                                                                                                                                                                                                                                                                                                                                                                                                                                                                                                                                                                                                                                                            |
|---------------------|----------|---|----------------------------------------------------------------------------------|------|------------------------------------------------------------------------------------------------------------------------------------------------------------------------------------------------------------------------------------------------------------------------------------------------------------------------------------------------------------------------------------------------------------------------------------------------------------------------------------------------------------------------------------------------------------------------------------------------------------------------------------------------------------------------------------------------------------|
| Steroid degradation | map00984 | 2 | ec:1.1.1.145 - dehydrogenase, ec:1.1.1.51 - 17)beta-hydroxysteroid dehydrogenase | 2, 9 | vo_c2_Locus_4806_Transcript_29/66_Confidence_0.103_Length_1536, vo_c3_Locus_11279_Transcript_9/10_Confidence_0.136_Length_1385, vo_n1_Locus_9414_Transcript_8/13_Confidence_0.167_Length_606, vo_c2_Locus_189_Transcript_29/60_Confidence_0.015_Length_692, vo_c3_Locus_2031_Transcript_8/8_Confidence_0.111_Length_1389, vo_n2_Locus_636_Transcript_16/16_Confidence_0.139_Length_616, vo_n2_Locus_636_Transcript_14/16_Confidence_0.222_Length_622, vo_n2_Locus_636_Transcript_5/16_Confidence_0.194_Length_591, vo_n2_Locus_636_Transcript_3/16_Confidence_0.306_Length_685, vo_n2_Locus_30747_Transcript_1/1_Confidence_0.000_Length_951, vo_n2_Locus_636_Transcript_13/16_Confidence_0.222_Length_768 |
|---------------------|----------|---|----------------------------------------------------------------------------------|------|------------------------------------------------------------------------------------------------------------------------------------------------------------------------------------------------------------------------------------------------------------------------------------------------------------------------------------------------------------------------------------------------------------------------------------------------------------------------------------------------------------------------------------------------------------------------------------------------------------------------------------------------------------------------------------------------------------|



|                         |          |   |                                                        |      |                                                                                                                            |
|-------------------------|----------|---|--------------------------------------------------------|------|----------------------------------------------------------------------------------------------------------------------------|
| Carotenoid biosynthesis | map00906 | 2 | ec:2.5.1.32 - synthase,<br>ec:1.13.11.51 - dioxygenase | 1, 1 | vo_c2_Locus_7097_Transcript_3/3_Confidence_0.000_Length_3511, vo_n3_Locus_17738_Transcript_2/2_Confidence_0.000_Length_687 |
|-------------------------|----------|---|--------------------------------------------------------|------|----------------------------------------------------------------------------------------------------------------------------|

|                                   |          |   |                                                                  |       |                                                                                                                                                                                                                                                                                                                                                                                                                                                                                                                                                                                                                                                                                                                                                                                                                                                                                                                                                                                                                                                                                                                                                                                                                                                                                                                                                                                                                                                                                                                                                                                                                                                                                                                                                                                                                                                                                                                                                                                                                                                                                                                                                                                                                                                                                                                                                                                                                                                                                                                                                                                                                                                                                                                                                                                                                                                                                                                                                                                                                                                                                                                                                                                                                                                                                                                                                                                                                                                                                                                                                                                                                                                                                                                                                                                                                                                                                                                                                                                                                                                                                                                                                                                                                                                                                                                                                                                                                                                                                                                                                                                                                                                                                                                                                                                                                                                                                                                                                                                                                                                                                                                                                                                                                                                                                                                                                                                                                                                                                                                                                                                                                                                                                                                                                                                                                                    |
|-----------------------------------|----------|---|------------------------------------------------------------------|-------|------------------------------------------------------------------------------------------------------------------------------------------------------------------------------------------------------------------------------------------------------------------------------------------------------------------------------------------------------------------------------------------------------------------------------------------------------------------------------------------------------------------------------------------------------------------------------------------------------------------------------------------------------------------------------------------------------------------------------------------------------------------------------------------------------------------------------------------------------------------------------------------------------------------------------------------------------------------------------------------------------------------------------------------------------------------------------------------------------------------------------------------------------------------------------------------------------------------------------------------------------------------------------------------------------------------------------------------------------------------------------------------------------------------------------------------------------------------------------------------------------------------------------------------------------------------------------------------------------------------------------------------------------------------------------------------------------------------------------------------------------------------------------------------------------------------------------------------------------------------------------------------------------------------------------------------------------------------------------------------------------------------------------------------------------------------------------------------------------------------------------------------------------------------------------------------------------------------------------------------------------------------------------------------------------------------------------------------------------------------------------------------------------------------------------------------------------------------------------------------------------------------------------------------------------------------------------------------------------------------------------------------------------------------------------------------------------------------------------------------------------------------------------------------------------------------------------------------------------------------------------------------------------------------------------------------------------------------------------------------------------------------------------------------------------------------------------------------------------------------------------------------------------------------------------------------------------------------------------------------------------------------------------------------------------------------------------------------------------------------------------------------------------------------------------------------------------------------------------------------------------------------------------------------------------------------------------------------------------------------------------------------------------------------------------------------------------------------------------------------------------------------------------------------------------------------------------------------------------------------------------------------------------------------------------------------------------------------------------------------------------------------------------------------------------------------------------------------------------------------------------------------------------------------------------------------------------------------------------------------------------------------------------------------------------------------------------------------------------------------------------------------------------------------------------------------------------------------------------------------------------------------------------------------------------------------------------------------------------------------------------------------------------------------------------------------------------------------------------------------------------------------------------------------------------------------------------------------------------------------------------------------------------------------------------------------------------------------------------------------------------------------------------------------------------------------------------------------------------------------------------------------------------------------------------------------------------------------------------------------------------------------------------------------------------------------------------------------------------------------------------------------------------------------------------------------------------------------------------------------------------------------------------------------------------------------------------------------------------------------------------------------------------------------------------------------------------------------------------------------------------------------------------------------------------------------------------------|
| T cell receptor signaling pathway | map04660 | 2 | ec:2.7.10.2 - protein-tyrosine kinase, ec:3.1.3.16 - phosphatase | 3, 98 | <p>vo_n1_Locus_304_Transcript_19/31_Confidence_0.364_Length_3278, vo_n1_Locus_304_Transcript_26/31_Confidence_0.352_Length_5345, tri_n_comp49150_c0_seq1, tri_c_comp42222_c0_seq1, tri_n_comp11728_c0_seq1, tri_n_comp11728_c0_seq2, vo_n2_Locus_618_Transcript_2/13_Confidence_0.167_Length_2515, vo_c1_Locus_1075_Transcript_27/66_Confidence_0.029_Length_2812, vo_n1_Locus_10083_Transcript_2/5_Confidence_0.200_Length_5459, vo_c3_Locus_1110_Transcript_23/23_Confidence_0.171_Length_1349, vo_c2_Locus_2829_Transcript_16/21_Confidence_0.421_Length_2869, tri_c_comp13504_c0_seq2, vo_n3_Locus_406_Transcript_4/22_Confidence_0.581_Length_1350, vo_n2_Locus_183_Transcript_41/101_Confidence_0.031_Length_3376, vo_c1_Locus_14246_Transcript_1/6_Confidence_0.538_Length_3413, vo_n2_Locus_12759_Transcript_1/1_Confidence_0.000_Length_1292, vo_n2_Locus_820_Transcript_22/27_Confidence_0.436_Length_4411, vo_c2_Locus_19330_Transcript_4/8_Confidence_0.625_Length_1112, vo_c1_Locus_3292_Transcript_10/17_Confidence_0.208_Length_1553, tri_n_comp15472_c0_seq1, vo_c1_Locus_17659_Transcript_2/5_Confidence_0.429_Length_3424, vo_n1_Locus_1557_Transcript_12/32_Confidence_0.413_Length_1400, tri_c_comp39423_c0_seq1, vo_c2_Locus_325_Transcript_1/5_Confidence_0.273_Length_3600, vo_c3_Locus_20940_Transcript_2/2_Confidence_0.000_Length_1114, vo_n1_Locus_1557_Transcript_7/32_Confidence_0.283_Length_3416, vo_n2_Locus_32740_Transcript_1/2_Confidence_0.333_Length_1824, vo_c1_Locus_11577_Transcript_6/6_Confidence_0.000_Length_903, tri_n_comp43002_c0_seq1, vo_n3_Locus_1745_Transcript_1/1_Confidence_0.333_Length_1610, tri_c_comp46798_c0_seq1, vo_c2_Locus_34481_Transcript_1/2_Confidence_0.667_Length_1801, vo_n1_Locus_23893_Transcript_1/1_Confidence_0.000_Length_1778, tri_c_comp57853_c0_seq1, vo_c1_Locus_169_Transcript_13/33_Confidence_0.257_Length_1323, tri_c_comp29751_c0_seq1, tri_c_comp16460_c0_seq2, vo_c1_Locus_6126_Transcript_1/2_Confidence_0.667_Length_1159, vo_n3_Locus_8585_Transcript_2/3_Confidence_0.400_Length_1473, vo_c3_Locus_35940_Transcript_1/1_Confidence_0.000_Length_1207, vo_n1_Locus_19163_Transcript_1/1_Confidence_0.000_Length_3417, vo_c1_Locus_7585_Transcript_12/13_Confidence_0.500_Length_1730, vo_c1_Locus_169_Transcript_10/33_Confidence_0.300_Length_1343, vo_c3_Locus_4701_Transcript_1/2_Confidence_0.833_Length_1495, vo_n1_Locus_1594_Transcript_8/12_Confidence_0.529_Length_3454, tri_n_comp13698_c0_seq2, tri_c_comp8446_c0_seq1, vo_n1_Locus_1557_Transcript_17/32_Confidence_0.304_Length_985, vo_c2_Locus_15966_Transcript_1/1_Confidence_0.000_Length_1558, vo_c1_Locus_1081_Transcript_12/28_Confidence_0.279_Length_1129, vo_n2_Locus_820_Transcript_10/27_Confidence_0.418_Length_1385, vo_c2_Locus_3834_Transcript_23/50_Confidence_0.062_Length_3121, vo_n3_Locus_406_Transcript_14/22_Confidence_0.516_Length_1465, tri_n_comp61518_c0_seq1, vo_n1_Locus_1557_Transcript_22/32_Confidence_0.239_Length_1016, vo_n2_Locus_20461_Transcript_3/4_Confidence_0.375_Length_3394, vo_n1_Locus_6468_Transcript_2/2_Confidence_0.000_Length_1048, vo_c1_Locus_29320_Transcript_1/1_Confidence_0.000_Length_2103, vo_c3_Locus_4822_Transcript_1/2_Confidence_0.714_Length_1522, vo_n1_Locus_471_Transcript_13/17_Confidence_0.355_Length_2286, tri_n_comp6659_c0_seq1, vo_c2_Locus_19330_Transcript_2/8_Confidence_0.625_Length_1071, tri_c_comp19264_c0_seq1, tri_c_comp19264_c0_seq5, tri_c_comp36977_c0_seq1, vo_n1_Locus_10488_Transcript_9/10_Confidence_0.312_Length_1034, vo_c1_Locus_4899_Transcript_11/22_Confidence_0.429_Length_2516, vo_n1_Locus_1557_Transcript_14/32_Confidence_0.413_Length_1398, vo_n2_Locus_479_Transcript_39/48_Confidence_0.029_Length_4102, tri_n_comp19137_c0_seq4, vo_c2_Locus_6204_Transcript_1/3_Confidence_0.714_Length_1299, vo_c1_Locus_7585_Transcript_13/13_Confidence_0.250_Length_1594, vo_c2_Locus_911_Transcript_5/24_Confidence_0.205_Length_2131, vo_c3_Locus_756_Transcript_2/3_Confidence_0.400_Length_2477, vo_c1_Locus_11577_Transcript_4/6_Confidence_0.222_Length_639, vo_c2_Locus_507_Transcript_12/22_Confidence_0.447_Length_1412, vo_n2_Locus_820_Transcript_14/27_Confidence_0.382_Length_1635, vo_n2_Locus_820_Transcript_5/27_Confidence_0.382_Length_1475, vo_n3_Locus_1224_Transcript_33/39_Confidence_0.173_Length_3279, vo_n3_Locus_16559_Transcript_1/4_Confidence_0.833_Length_3357, vo_n1_Locus_3668_Transcript_1/1_Confidence_0.000_Length_1350, vo_c1_Locus_7585_Transcript_10/13_Confidence_0.562_Length_1842, vo_n2_Locus_8141_Transcript_2/2_Confidence_0.250_Length_1579, vo_c1_Locus_7585_Transcript_11/13_Confidence_0.562_Length_1777, vo_c1_Locus_6537_Transcript_1/3_Confidence_0.400_Length_3118, vo_c1_Locus_1075_Transcript_28/66_Confidence_0.032_Length_3054, vo_n1_Locus_3894_Transcript_1/1_Confidence_0.000_Length_1928, vo_c1_Locus_14246_Transcript_3/6_Confidence_0.615_Length_3488, vo_c3_Locus_1110_Transcript_19/23_Confidence_0.537_Length_1687, vo_n3_Locus_1772_Transcript_1/2_Confidence_0.333_Length_1879, vo_n2_Locus_3822_Transcript_12/14_Confidence_0.562_Length_2066, vo_c1_Locus_23835_Transcript_2/2_Confidence_0.167_Length_1401, vo_n2_Locus_21630_Transcript_1/2_Confidence_1.000_Length_2263, vo_n2_Locus_13821_Transcript_1/2_Confidence_0.833_Length_1344, vo_c2_Locus_32056_Transcript_1/1_Confidence_0.000_Length_1722, vo_c1_Locus_14246_Transcript_4/6_Confidence_0.462_Length_3446, vo_n2_Locus_820_Transcript_2/27_Confidence_0.200_Length_1373, vo_c2_Locus_33927_Transcript_1/2_Confidence_0.333_Length_1530, vo_c3_Locus_21550_Transcript_4/4_Confidence_0.000_Length_602, vo_c3_Locus_12812_Transcript_5/5_Confidence_0.143_Length_6845, vo_n1_Locus_471_Transcript_17/17_Confidence_0.032_Length_2196</p> |
|-----------------------------------|----------|---|------------------------------------------------------------------|-------|------------------------------------------------------------------------------------------------------------------------------------------------------------------------------------------------------------------------------------------------------------------------------------------------------------------------------------------------------------------------------------------------------------------------------------------------------------------------------------------------------------------------------------------------------------------------------------------------------------------------------------------------------------------------------------------------------------------------------------------------------------------------------------------------------------------------------------------------------------------------------------------------------------------------------------------------------------------------------------------------------------------------------------------------------------------------------------------------------------------------------------------------------------------------------------------------------------------------------------------------------------------------------------------------------------------------------------------------------------------------------------------------------------------------------------------------------------------------------------------------------------------------------------------------------------------------------------------------------------------------------------------------------------------------------------------------------------------------------------------------------------------------------------------------------------------------------------------------------------------------------------------------------------------------------------------------------------------------------------------------------------------------------------------------------------------------------------------------------------------------------------------------------------------------------------------------------------------------------------------------------------------------------------------------------------------------------------------------------------------------------------------------------------------------------------------------------------------------------------------------------------------------------------------------------------------------------------------------------------------------------------------------------------------------------------------------------------------------------------------------------------------------------------------------------------------------------------------------------------------------------------------------------------------------------------------------------------------------------------------------------------------------------------------------------------------------------------------------------------------------------------------------------------------------------------------------------------------------------------------------------------------------------------------------------------------------------------------------------------------------------------------------------------------------------------------------------------------------------------------------------------------------------------------------------------------------------------------------------------------------------------------------------------------------------------------------------------------------------------------------------------------------------------------------------------------------------------------------------------------------------------------------------------------------------------------------------------------------------------------------------------------------------------------------------------------------------------------------------------------------------------------------------------------------------------------------------------------------------------------------------------------------------------------------------------------------------------------------------------------------------------------------------------------------------------------------------------------------------------------------------------------------------------------------------------------------------------------------------------------------------------------------------------------------------------------------------------------------------------------------------------------------------------------------------------------------------------------------------------------------------------------------------------------------------------------------------------------------------------------------------------------------------------------------------------------------------------------------------------------------------------------------------------------------------------------------------------------------------------------------------------------------------------------------------------------------------------------------------------------------------------------------------------------------------------------------------------------------------------------------------------------------------------------------------------------------------------------------------------------------------------------------------------------------------------------------------------------------------------------------------------------------------------------------------------------------------------|

|                                                           |          |   |                                                                                                          |      |                                                                                                                                                                                                                                                                                                                                                                                                                                                                                                                                                |
|-----------------------------------------------------------|----------|---|----------------------------------------------------------------------------------------------------------|------|------------------------------------------------------------------------------------------------------------------------------------------------------------------------------------------------------------------------------------------------------------------------------------------------------------------------------------------------------------------------------------------------------------------------------------------------------------------------------------------------------------------------------------------------|
| Glycosphingolipid biosynthesis - lacto and neolactoseries | map00601 | 2 | ec:2.4.1.69 - 1 galactoside alpha-(1,2)-fucosyltransferase,<br>ec:2.4.99.4 - alpha-2,3-sialyltransferase | 6, 4 | tri_n_comp19717_c0_seq12, vo_c3_Locus_23760_Transcript_6/6_Confidence_0.000_Length_2139,<br>vo_c2_Locus_20640_Transcript_3/3_Confidence_0.000_Length_2001, vo_n3_Locus_30096_Transcript_2/2_Confidence_0.000_Length_2064,<br>tri_n_comp19717_c0_seq5, tri_c_comp19907_c0_seq6, vo_c2_Locus_30916_Transcript_1/3_Confidence_0.600_Length_1243,<br>vo_n2_Locus_15072_Transcript_3/7_Confidence_0.429_Length_1062, vo_n2_Locus_15072_Transcript_4/7_Confidence_0.286_Length_628,<br>vo_c1_Locus_6341_Transcript_8/13_Confidence_0.611_Length_1057 |
|-----------------------------------------------------------|----------|---|----------------------------------------------------------------------------------------------------------|------|------------------------------------------------------------------------------------------------------------------------------------------------------------------------------------------------------------------------------------------------------------------------------------------------------------------------------------------------------------------------------------------------------------------------------------------------------------------------------------------------------------------------------------------------|

|                                 |          |   |                                  |   |                                                                                                                                                      |
|---------------------------------|----------|---|----------------------------------|---|------------------------------------------------------------------------------------------------------------------------------------------------------|
| Lipopolysaccharide biosynthesis | map00540 | 1 | ec:2.3.1.129 - O-acyltransferase | 3 | vo_n2_Locus_8711_Transcript_5/5_Confidence_0.067_Length_1558, vo_c2_Locus_11984_Transcript_2/6_Confidence_0.385_Length_1557, tri_c_comp30049_c0_seq1 |
| Lipoic acid metabolism          | map00785 | 1 | ec:2.8.1.8 - synthase            | 1 | tri_c_comp28689_c0_seq1                                                                                                                              |

|                     |          |   |                             |    |                                                                                                                                                                                                                                                                                                                                                                                                                                                                                                                                                                                                                                                                                                                                                                                                                                                                                                                                                                                            |
|---------------------|----------|---|-----------------------------|----|--------------------------------------------------------------------------------------------------------------------------------------------------------------------------------------------------------------------------------------------------------------------------------------------------------------------------------------------------------------------------------------------------------------------------------------------------------------------------------------------------------------------------------------------------------------------------------------------------------------------------------------------------------------------------------------------------------------------------------------------------------------------------------------------------------------------------------------------------------------------------------------------------------------------------------------------------------------------------------------------|
| Toluene degradation | map00623 | 1 | ec:1.1.1.35 - dehydrogenase | 16 | vo_c2_Locus_2261_Transcript_1/2_Confidence_1.000_Length_2564, vo_n1_Locus_9414_Transcript_8/13_Confidence_0.167_Length_606, vo_c1_Locus_40339_Transcript_1/1_Confidence_0.000_Length_1318, vo_c3_Locus_2031_Transcript_8/8_Confidence_0.111_Length_1389, vo_n1_Locus_11137_Transcript_5/5_Confidence_0.143_Length_2829, vo_c1_Locus_4675_Transcript_3/3_Confidence_0.200_Length_1348, vo_n2_Locus_30747_Transcript_1/1_Confidence_0.000_Length_951, vo_n2_Locus_636_Transcript_13/16_Confidence_0.222_Length_768, vo_c1_Locus_2815_Transcript_3/4_Confidence_0.200_Length_2244, vo_c3_Locus_9925_Transcript_8/11_Confidence_0.263_Length_3550, tri_n_comp42565_c0_seq1, vo_c2_Locus_189_Transcript_29/60_Confidence_0.015_Length_692, vo_n2_Locus_636_Transcript_16/16_Confidence_0.139_Length_616, vo_n2_Locus_636_Transcript_14/16_Confidence_0.222_Length_622, vo_n2_Locus_636_Transcript_5/16_Confidence_0.194_Length_591, vo_n2_Locus_636_Transcript_3/16_Confidence_0.306_Length_685 |
|---------------------|----------|---|-----------------------------|----|--------------------------------------------------------------------------------------------------------------------------------------------------------------------------------------------------------------------------------------------------------------------------------------------------------------------------------------------------------------------------------------------------------------------------------------------------------------------------------------------------------------------------------------------------------------------------------------------------------------------------------------------------------------------------------------------------------------------------------------------------------------------------------------------------------------------------------------------------------------------------------------------------------------------------------------------------------------------------------------------|

|                                      |          |   |                                             |   |                                                                                                                                                                                                                                                                  |
|--------------------------------------|----------|---|---------------------------------------------|---|------------------------------------------------------------------------------------------------------------------------------------------------------------------------------------------------------------------------------------------------------------------|
| Other types of O-glycan biosynthesis | map00514 | 1 | ec:2.4.99.1 - alpha-(2,6)-sialyltransferase | 6 | vo_n1_Locus_4002_Transcript_6/7_Confidence_0.091_Length_1369, tri_c_comp4119_c0_seq1, vo_n1_Locus_4002_Transcript_4/7_Confidence_0.636_Length_1286, vo_n2_Locus_15072_Transcript_4/7_Confidence_0.286_Length_628, tri_c_comp6583_c0_seq1, tri_n_comp6433_c0_seq1 |
|--------------------------------------|----------|---|---------------------------------------------|---|------------------------------------------------------------------------------------------------------------------------------------------------------------------------------------------------------------------------------------------------------------------|

|                          |          |   |                 |    |                                                                                                                                                                                                                                                                                                                                                                                                                                                                                                                                                                                                                                                                                                                                                                                                                                                                                                                                                                                                                                                                                                                                                                                                                                                                                                                                                                                                                                                                                                                                                                                                                                                                                                                                                                                                                                                                                                                                                                                                                                                                                                                                                                                                                                                                                                                                                                                                                                                                                                                                                                                                                                                                                                                                                                                                                                                                                                                                                                                                                                                                                                                                                                                                                                                                                                                                                                                                                                                                                                                                                                                     |
|--------------------------|----------|---|-----------------|----|-------------------------------------------------------------------------------------------------------------------------------------------------------------------------------------------------------------------------------------------------------------------------------------------------------------------------------------------------------------------------------------------------------------------------------------------------------------------------------------------------------------------------------------------------------------------------------------------------------------------------------------------------------------------------------------------------------------------------------------------------------------------------------------------------------------------------------------------------------------------------------------------------------------------------------------------------------------------------------------------------------------------------------------------------------------------------------------------------------------------------------------------------------------------------------------------------------------------------------------------------------------------------------------------------------------------------------------------------------------------------------------------------------------------------------------------------------------------------------------------------------------------------------------------------------------------------------------------------------------------------------------------------------------------------------------------------------------------------------------------------------------------------------------------------------------------------------------------------------------------------------------------------------------------------------------------------------------------------------------------------------------------------------------------------------------------------------------------------------------------------------------------------------------------------------------------------------------------------------------------------------------------------------------------------------------------------------------------------------------------------------------------------------------------------------------------------------------------------------------------------------------------------------------------------------------------------------------------------------------------------------------------------------------------------------------------------------------------------------------------------------------------------------------------------------------------------------------------------------------------------------------------------------------------------------------------------------------------------------------------------------------------------------------------------------------------------------------------------------------------------------------------------------------------------------------------------------------------------------------------------------------------------------------------------------------------------------------------------------------------------------------------------------------------------------------------------------------------------------------------------------------------------------------------------------------------------------------|
| Linoleic acid metabolism | map00591 | 1 | ec:3.1.1.4 - A2 | 59 | <p>vo_n2_Locus_311_Transcript_71/114_Confidence_0.150_Length_1045, vo_c3_Locus_7729_Transcript_4/5_Confidence_0.167_Length_5654, vo_n1_Locus_443_Transcript_30/53_Confidence_0.193_Length_928, vo_c1_Locus_430_Transcript_20/51_Confidence_0.291_Length_976, vo_c2_Locus_601_Transcript_31/36_Confidence_0.229_Length_1002, vo_c2_Locus_5092_Transcript_6/14_Confidence_0.476_Length_1090, vo_c3_Locus_1328_Transcript_24/26_Confidence_0.245_Length_1398, vo_n2_Locus_311_Transcript_78/114_Confidence_0.093_Length_844, vo_c3_Locus_1273_Transcript_51/57_Confidence_0.108_Length_895, vo_c1_Locus_21671_Transcript_6/49_Confidence_0.021_Length_1919, vo_c3_Locus_1273_Transcript_50/57_Confidence_0.144_Length_1471, vo_n1_Locus_443_Transcript_24/53_Confidence_0.109_Length_905, vo_n2_Locus_311_Transcript_87/114_Confidence_0.061_Length_2919, vo_n3_Locus_407_Transcript_22/43_Confidence_0.292_Length_1222, tri_n_comp10070_c0_seq2, tri_c_comp22021_c0_seq1, vo_n1_Locus_443_Transcript_32/53_Confidence_0.252_Length_1164, vo_n3_Locus_407_Transcript_32/43_Confidence_0.283_Length_1271, vo_n1_Locus_443_Transcript_10/53_Confidence_0.193_Length_1076, vo_n3_Locus_407_Transcript_7/43_Confidence_0.132_Length_1778, vo_n2_Locus_311_Transcript_109/114_Confidence_0.117_Length_1018, vo_n3_Locus_407_Transcript_39/43_Confidence_0.236_Length_1222, vo_c3_Locus_15467_Transcript_2/2_Confidence_0.000_Length_1100, vo_n1_Locus_4880_Transcript_2/6_Confidence_0.333_Length_883, vo_n2_Locus_3013_Transcript_1/2_Confidence_0.750_Length_964, vo_n2_Locus_311_Transcript_112/114_Confidence_0.146_Length_1678, vo_c2_Locus_601_Transcript_27/36_Confidence_0.337_Length_991, vo_c2_Locus_601_Transcript_2/36_Confidence_0.133_Length_1744, vo_n1_Locus_443_Transcript_39/53_Confidence_0.210_Length_1938, vo_c3_Locus_15467_Transcript_1/2_Confidence_0.750_Length_988, vo_c1_Locus_430_Transcript_11/51_Confidence_0.145_Length_955, vo_c2_Locus_5092_Transcript_10/14_Confidence_0.429_Length_1495, vo_n2_Locus_21867_Transcript_2/5_Confidence_0.200_Length_5139, tri_n_comp20432_c0_seq6, vo_n2_Locus_311_Transcript_84/114_Confidence_0.117_Length_1124, vo_n2_Locus_311_Transcript_77/114_Confidence_0.134_Length_997, vo_n2_Locus_311_Transcript_90/114_Confidence_0.061_Length_1016, vo_c2_Locus_601_Transcript_11/36_Confidence_0.289_Length_1016, tri_n_comp20432_c0_seq2, vo_c1_Locus_430_Transcript_48/51_Confidence_0.227_Length_968, vo_n1_Locus_443_Transcript_17/53_Confidence_0.168_Length_1009, tri_c_comp8925_c1_seq1, vo_c2_Locus_601_Transcript_18/36_Confidence_0.265_Length_801, vo_c3_Locus_1273_Transcript_17/57_Confidence_0.050_Length_1126, vo_n3_Locus_407_Transcript_40/43_Confidence_0.217_Length_1200, vo_c2_Locus_601_Transcript_36/36_Confidence_0.217_Length_953, vo_n3_Locus_407_Transcript_8/43_Confidence_0.189_Length_1800, vo_c3_Locus_1273_Transcript_16/57_Confidence_0.079_Length_1101, tri_n_comp20662_c0_seq7, vo_n2_Locus_23060_Transcript_2/2_Confidence_0.000_Length_889, vo_c2_Locus_601_Transcript_15/36_Confidence_0.337_Length_815, vo_n1_Locus_4880_Transcript_4/6_Confidence_0.333_Length_1109, vo_n2_Locus_311_Transcript_3/114_Confidence_0.142_Length_866, tri_c_comp20860_c0_seq2, vo_n1_Locus_443_Transcript_8/53_Confidence_0.261_Length_1031, vo_n1_Locus_443_Transcript_49/53_Confidence_0.134_Length_862, vo_n3_Locus_407_Transcript_14/43_Confidence_0.142_Length_872, vo_c2_Locus_5609_Transcript_4/4_Confidence_0.250_Length_1105, vo_c3_Locus_17900_Transcript_1/1_Confidence_0.000_Length_966</p> |
|--------------------------|----------|---|-----------------|----|-------------------------------------------------------------------------------------------------------------------------------------------------------------------------------------------------------------------------------------------------------------------------------------------------------------------------------------------------------------------------------------------------------------------------------------------------------------------------------------------------------------------------------------------------------------------------------------------------------------------------------------------------------------------------------------------------------------------------------------------------------------------------------------------------------------------------------------------------------------------------------------------------------------------------------------------------------------------------------------------------------------------------------------------------------------------------------------------------------------------------------------------------------------------------------------------------------------------------------------------------------------------------------------------------------------------------------------------------------------------------------------------------------------------------------------------------------------------------------------------------------------------------------------------------------------------------------------------------------------------------------------------------------------------------------------------------------------------------------------------------------------------------------------------------------------------------------------------------------------------------------------------------------------------------------------------------------------------------------------------------------------------------------------------------------------------------------------------------------------------------------------------------------------------------------------------------------------------------------------------------------------------------------------------------------------------------------------------------------------------------------------------------------------------------------------------------------------------------------------------------------------------------------------------------------------------------------------------------------------------------------------------------------------------------------------------------------------------------------------------------------------------------------------------------------------------------------------------------------------------------------------------------------------------------------------------------------------------------------------------------------------------------------------------------------------------------------------------------------------------------------------------------------------------------------------------------------------------------------------------------------------------------------------------------------------------------------------------------------------------------------------------------------------------------------------------------------------------------------------------------------------------------------------------------------------------------------------|

|                                                |          |   |                                      |   |                                                              |
|------------------------------------------------|----------|---|--------------------------------------|---|--------------------------------------------------------------|
| Flavone<br>and<br>flavonol<br>biosynthe<br>sis | map00944 | 1 | ec:2.8.2.25 - 3-<br>sulfotransferase | 1 | vo_c3_Locus_1509_Transcript_1/2_Confidence_0.750_Length_1318 |
|------------------------------------------------|----------|---|--------------------------------------|---|--------------------------------------------------------------|



|                                  |          |   |                           |    |                                                                                                                                                                                                                                                                                                                                                                                                                                                                                                                                                                                                                                                                                                                                                                                                                                                                                                                                                                                                                                                                                                                                                                                                                                                                                                                                                                                                                                                                                                                                                                                                                                                                                                                                                                                                                                                                                                                                                                                                                                                                                                                                                                                                                                                                                                                                                                                                                                                                                                                                                                                                                                                                                                                                                                                                                                                                                                                                                                                                                                                                                                                                                                                                                                                                                                                                                                                                                                                                                                                                                                                                                                                                                                                                                                                                                                                                                                                                                                                                                                                                                                                                                                                                                                                                                                                                                                                                                                                                                                                                                                                                                                                                                                                                                                                                                                                                                                                                                                                                                                                                                                                                                                                                                                                                                                                                                                                                                                                                                                                                                                                                                                                                                                      |
|----------------------------------|----------|---|---------------------------|----|------------------------------------------------------------------------------------------------------------------------------------------------------------------------------------------------------------------------------------------------------------------------------------------------------------------------------------------------------------------------------------------------------------------------------------------------------------------------------------------------------------------------------------------------------------------------------------------------------------------------------------------------------------------------------------------------------------------------------------------------------------------------------------------------------------------------------------------------------------------------------------------------------------------------------------------------------------------------------------------------------------------------------------------------------------------------------------------------------------------------------------------------------------------------------------------------------------------------------------------------------------------------------------------------------------------------------------------------------------------------------------------------------------------------------------------------------------------------------------------------------------------------------------------------------------------------------------------------------------------------------------------------------------------------------------------------------------------------------------------------------------------------------------------------------------------------------------------------------------------------------------------------------------------------------------------------------------------------------------------------------------------------------------------------------------------------------------------------------------------------------------------------------------------------------------------------------------------------------------------------------------------------------------------------------------------------------------------------------------------------------------------------------------------------------------------------------------------------------------------------------------------------------------------------------------------------------------------------------------------------------------------------------------------------------------------------------------------------------------------------------------------------------------------------------------------------------------------------------------------------------------------------------------------------------------------------------------------------------------------------------------------------------------------------------------------------------------------------------------------------------------------------------------------------------------------------------------------------------------------------------------------------------------------------------------------------------------------------------------------------------------------------------------------------------------------------------------------------------------------------------------------------------------------------------------------------------------------------------------------------------------------------------------------------------------------------------------------------------------------------------------------------------------------------------------------------------------------------------------------------------------------------------------------------------------------------------------------------------------------------------------------------------------------------------------------------------------------------------------------------------------------------------------------------------------------------------------------------------------------------------------------------------------------------------------------------------------------------------------------------------------------------------------------------------------------------------------------------------------------------------------------------------------------------------------------------------------------------------------------------------------------------------------------------------------------------------------------------------------------------------------------------------------------------------------------------------------------------------------------------------------------------------------------------------------------------------------------------------------------------------------------------------------------------------------------------------------------------------------------------------------------------------------------------------------------------------------------------------------------------------------------------------------------------------------------------------------------------------------------------------------------------------------------------------------------------------------------------------------------------------------------------------------------------------------------------------------------------------------------------------------------------------------------------------------------------------|
| Th1 and Th2 cell differentiation | map04658 | 1 | ec:3.1.3.16 - phosphatase | 98 | <p>tri_c_comp42222_c0_seq1, tri_n_comp11728_c0_seq1, tri_n_comp11728_c0_seq2, vo_n2_Locus_618_Transcript_2/13_Confidence_0.167_Length_2515, vo_c1_Locus_1075_Transcript_27/66_Confidence_0.029_Length_2812, vo_n1_Locus_10083_Transcript_2/5_Confidence_0.200_Length_5459, vo_c3_Locus_1110_Transcript_23/23_Confidence_0.171_Length_1349, vo_c2_Locus_2829_Transcript_16/21_Confidence_0.421_Length_2869, tri_c_comp13504_c0_seq2, vo_n3_Locus_406_Transcript_4/22_Confidence_0.581_Length_1350, vo_n2_Locus_183_Transcript_41/101_Confidence_0.031_Length_3376, vo_c1_Locus_14246_Transcript_1/6_Confidence_0.538_Length_3413, vo_n2_Locus_12759_Transcript_1/1_Confidence_0.000_Length_1292, vo_n2_Locus_820_Transcript_22/27_Confidence_0.436_Length_4411, vo_c2_Locus_19330_Transcript_4/8_Confidence_0.625_Length_1112, vo_c1_Locus_3292_Transcript_10/17_Confidence_0.208_Length_1553, tri_n_comp15472_c0_seq1, vo_c1_Locus_17659_Transcript_2/5_Confidence_0.429_Length_3424, vo_n1_Locus_1557_Transcript_12/32_Confidence_0.413_Length_1400, tri_c_comp39423_c0_seq1, vo_c2_Locus_325_Transcript_1/5_Confidence_0.273_Length_3600, vo_c3_Locus_20940_Transcript_2/2_Confidence_0.000_Length_1114, vo_n1_Locus_1557_Transcript_7/32_Confidence_0.283_Length_3416, vo_n2_Locus_32740_Transcript_1/2_Confidence_0.333_Length_1824, vo_c1_Locus_11577_Transcript_6/6_Confidence_0.000_Length_903, tri_n_comp43002_c0_seq1, vo_n3_Locus_1745_Transcript_1/1_Confidence_0.333_Length_1610, tri_c_comp46798_c0_seq1, vo_c2_Locus_34481_Transcript_1/2_Confidence_0.667_Length_1801, vo_n1_Locus_23893_Transcript_1/1_Confidence_0.000_Length_1778, tri_c_comp57853_c0_seq1, vo_c1_Locus_169_Transcript_13/33_Confidence_0.257_Length_1323, tri_c_comp29751_c0_seq1, tri_c_comp16460_c0_seq2, vo_c1_Locus_6126_Transcript_1/2_Confidence_0.667_Length_1159, vo_n3_Locus_8585_Transcript_2/3_Confidence_0.400_Length_1473, vo_c3_Locus_35940_Transcript_1/1_Confidence_0.000_Length_1207, vo_n1_Locus_19163_Transcript_1/1_Confidence_0.000_Length_3417, vo_c1_Locus_7585_Transcript_12/13_Confidence_0.500_Length_1730, vo_c1_Locus_169_Transcript_10/33_Confidence_0.300_Length_1343, vo_c3_Locus_4701_Transcript_1/2_Confidence_0.833_Length_1495, vo_n1_Locus_1594_Transcript_8/12_Confidence_0.529_Length_3454, tri_n_comp13698_c0_seq2, tri_c_comp8446_c0_seq1, vo_n1_Locus_1557_Transcript_17/32_Confidence_0.304_Length_985, vo_c2_Locus_15966_Transcript_1/1_Confidence_0.000_Length_1558, vo_c1_Locus_1081_Transcript_12/28_Confidence_0.279_Length_1129, vo_n2_Locus_820_Transcript_10/27_Confidence_0.418_Length_1385, vo_c2_Locus_3834_Transcript_23/50_Confidence_0.062_Length_3121, vo_n3_Locus_406_Transcript_14/22_Confidence_0.516_Length_1465, tri_n_comp61518_c0_seq1, tri_n_comp13698_c0_seq1, vo_n1_Locus_1557_Transcript_22/32_Confidence_0.239_Length_1016, vo_n2_Locus_20461_Transcript_3/4_Confidence_0.375_Length_3394, vo_n1_Locus_6468_Transcript_2/2_Confidence_0.000_Length_1048, vo_c1_Locus_29320_Transcript_1/1_Confidence_0.000_Length_2103, vo_c3_Locus_4822_Transcript_1/2_Confidence_0.714_Length_1522, vo_n1_Locus_471_Transcript_13/17_Confidence_0.355_Length_2286, tri_n_comp6659_c0_seq1, vo_c2_Locus_19330_Transcript_2/8_Confidence_0.625_Length_1071, tri_c_comp19264_c0_seq1, tri_c_comp19264_c0_seq5, tri_c_comp36977_c0_seq1, vo_n1_Locus_10488_Transcript_9/10_Confidence_0.312_Length_1034, vo_c1_Locus_4899_Transcript_11/22_Confidence_0.429_Length_2516, vo_n1_Locus_1557_Transcript_14/32_Confidence_0.413_Length_1398, vo_n2_Locus_479_Transcript_39/48_Confidence_0.029_Length_4102, tri_n_comp19137_c0_seq4, vo_c2_Locus_6204_Transcript_1/3_Confidence_0.714_Length_1299, vo_c1_Locus_7585_Transcript_13/13_Confidence_0.250_Length_1594, vo_c2_Locus_911_Transcript_5/24_Confidence_0.205_Length_2131, vo_c3_Locus_756_Transcript_2/3_Confidence_0.400_Length_2477, vo_c1_Locus_11577_Transcript_4/6_Confidence_0.222_Length_639, vo_c2_Locus_507_Transcript_12/22_Confidence_0.447_Length_1412, vo_n2_Locus_820_Transcript_14/27_Confidence_0.382_Length_1635, vo_n2_Locus_820_Transcript_5/27_Confidence_0.382_Length_1475, vo_n3_Locus_1224_Transcript_33/39_Confidence_0.173_Length_3279, vo_n3_Locus_16559_Transcript_1/4_Confidence_0.833_Length_3357, vo_n1_Locus_3668_Transcript_1/1_Confidence_0.000_Length_1350, vo_c1_Locus_7585_Transcript_10/13_Confidence_0.562_Length_1842, vo_n2_Locus_8141_Transcript_2/2_Confidence_0.250_Length_1579, vo_c1_Locus_7585_Transcript_11/13_Confidence_0.562_Length_1777, vo_c1_Locus_6537_Transcript_1/3_Confidence_0.400_Length_3118, vo_c1_Locus_1075_Transcript_28/66_Confidence_0.032_Length_3054, vo_n1_Locus_3894_Transcript_1/1_Confidence_0.000_Length_1928, vo_c1_Locus_14246_Transcript_3/6_Confidence_0.615_Length_3488, vo_c3_Locus_1110_Transcript_19/23_Confidence_0.537_Length_1687, vo_n3_Locus_1772_Transcript_1/2_Confidence_0.333_Length_1879, vo_n2_Locus_3822_Transcript_12/14_Confidence_0.562_Length_2066, vo_c1_Locus_23835_Transcript_2/2_Confidence_0.167_Length_1401, vo_n2_Locus_21630_Transcript_1/2_Confidence_1.000_Length_2263, vo_n2_Locus_13821_Transcript_1/2_Confidence_0.833_Length_1344, vo_c2_Locus_32056_Transcript_1/1_Confidence_0.000_Length_1722, vo_c1_Locus_14246_Transcript_4/6_Confidence_0.462_Length_3446, vo_n2_Locus_820_Transcript_2/27_Confidence_0.200_Length_1373, vo_c2_Locus_33927_Transcript_1/2_Confidence_0.333_Length_1530, vo_c3_Locus_21550_Transcript_4/4_Confidence_0.000_Length_602, vo_c3_Locus_12812_Transcript_5/5_Confidence_0.143_Length_6845, vo_n1_Locus_471_Transcript_17/17_Confidence_0.032_Length_2196</p> |
|----------------------------------|----------|---|---------------------------|----|------------------------------------------------------------------------------------------------------------------------------------------------------------------------------------------------------------------------------------------------------------------------------------------------------------------------------------------------------------------------------------------------------------------------------------------------------------------------------------------------------------------------------------------------------------------------------------------------------------------------------------------------------------------------------------------------------------------------------------------------------------------------------------------------------------------------------------------------------------------------------------------------------------------------------------------------------------------------------------------------------------------------------------------------------------------------------------------------------------------------------------------------------------------------------------------------------------------------------------------------------------------------------------------------------------------------------------------------------------------------------------------------------------------------------------------------------------------------------------------------------------------------------------------------------------------------------------------------------------------------------------------------------------------------------------------------------------------------------------------------------------------------------------------------------------------------------------------------------------------------------------------------------------------------------------------------------------------------------------------------------------------------------------------------------------------------------------------------------------------------------------------------------------------------------------------------------------------------------------------------------------------------------------------------------------------------------------------------------------------------------------------------------------------------------------------------------------------------------------------------------------------------------------------------------------------------------------------------------------------------------------------------------------------------------------------------------------------------------------------------------------------------------------------------------------------------------------------------------------------------------------------------------------------------------------------------------------------------------------------------------------------------------------------------------------------------------------------------------------------------------------------------------------------------------------------------------------------------------------------------------------------------------------------------------------------------------------------------------------------------------------------------------------------------------------------------------------------------------------------------------------------------------------------------------------------------------------------------------------------------------------------------------------------------------------------------------------------------------------------------------------------------------------------------------------------------------------------------------------------------------------------------------------------------------------------------------------------------------------------------------------------------------------------------------------------------------------------------------------------------------------------------------------------------------------------------------------------------------------------------------------------------------------------------------------------------------------------------------------------------------------------------------------------------------------------------------------------------------------------------------------------------------------------------------------------------------------------------------------------------------------------------------------------------------------------------------------------------------------------------------------------------------------------------------------------------------------------------------------------------------------------------------------------------------------------------------------------------------------------------------------------------------------------------------------------------------------------------------------------------------------------------------------------------------------------------------------------------------------------------------------------------------------------------------------------------------------------------------------------------------------------------------------------------------------------------------------------------------------------------------------------------------------------------------------------------------------------------------------------------------------------------------------------------------------------------------|

|                                               |          |   |                                        |   |                                                                                                                            |
|-----------------------------------------------|----------|---|----------------------------------------|---|----------------------------------------------------------------------------------------------------------------------------|
| Sesquiterpenoid and triterpenoid biosynthesis | map00909 | 1 | ec:2.5.1.21 - synthase                 | 1 | vo_n2_Locus_19315_Transcript_2/2_Confidence_0.000_Length_1802                                                              |
| D-Arginine and D-ornithine metabolism         | map00472 | 1 | ec:1.4.3.3 - oxidase                   | 1 | vo_n2_Locus_26350_Transcript_7/9_Confidence_0.231_Length_1309                                                              |
| Biosynthesis of terpenoids and steroids       | map01062 | 1 | ec:2.5.1.32 - synthase                 | 1 | vo_c2_Locus_7097_Transcript_3/3_Confidence_0.000_Length_3511                                                               |
| Biosynthesis of vancomycin group antibiotics  | map01055 | 1 | ec:4.2.1.46 - 4,6-dehydratase          | 2 | vo_c2_Locus_5377_Transcript_5/9_Confidence_0.150_Length_2142, vo_n1_Locus_5366_Transcript_4/4_Confidence_0.556_Length_1623 |
| Anthocyanin biosynthesis                      | map00942 | 1 | ec:2.4.1.115 - 3-O-glucosyltransferase | 1 | tri_c_comp17063_c0_seq3                                                                                                    |

|                                       |          |   |                                   |   |                                                                                                                                                                                                                                               |
|---------------------------------------|----------|---|-----------------------------------|---|-----------------------------------------------------------------------------------------------------------------------------------------------------------------------------------------------------------------------------------------------|
| Insect hormone biosynthesis           | map00981 | 1 | ec:1.2.1.3 - dehydrogenase (NAD+) | 5 | tri_c_comp55340_c0_seq1, vo_n1_Locus_19864_Transcript_2/2_Confidence_0.000_Length_2707, vo_c3_Locus_21741_Transcript_5/9_Confidence_0.583_Length_1757, vo_n3_Locus_25600_Transcript_5/6_Confidence_0.375_Length_1777, tri_n_comp58061_c0_seq1 |
| Acarbose and validamycin biosynthesis | map00525 | 1 | ec:4.2.1.46 - 4,6-dehydratase     | 2 | vo_c2_Locus_5377_Transcript_5/9_Confidence_0.150_Length_2142, vo_n1_Locus_5366_Transcript_4/4_Confidence_0.556_Length_1623                                                                                                                    |

|                       |          |   |                                  |    |                                                                                                                                                                                                                                                                                                                                                                                                                                                                                                                                                                                                                                                                 |
|-----------------------|----------|---|----------------------------------|----|-----------------------------------------------------------------------------------------------------------------------------------------------------------------------------------------------------------------------------------------------------------------------------------------------------------------------------------------------------------------------------------------------------------------------------------------------------------------------------------------------------------------------------------------------------------------------------------------------------------------------------------------------------------------|
| Betalain biosynthesis | map00965 | 1 | ec:2.1.1.6 - O-methyltransferase | 12 | vo_c1_Locus_19524_Transcript_9/12_Confidence_0.615_Length_3975, vo_n1_Locus_23463_Transcript_3/4_Confidence_0.286_Length_1512, tri_c_comp32679_c0_seq1, tri_n_comp8749_c0_seq1, vo_c2_Locus_24901_Transcript_2/2_Confidence_0.000_Length_1355, vo_c3_Locus_26293_Transcript_1/4_Confidence_0.750_Length_2211, vo_n2_Locus_17803_Transcript_2/2_Confidence_0.250_Length_2793, tri_n_comp4208_c0_seq2, vo_n2_Locus_17803_Transcript_1/2_Confidence_0.500_Length_2823, vo_n3_Locus_12676_Transcript_1/1_Confidence_0.000_Length_3081, vo_c3_Locus_17106_Transcript_1/2_Confidence_1.000_Length_3041, vo_c3_Locus_26293_Transcript_2/4_Confidence_0.500_Length_2353 |
|-----------------------|----------|---|----------------------------------|----|-----------------------------------------------------------------------------------------------------------------------------------------------------------------------------------------------------------------------------------------------------------------------------------------------------------------------------------------------------------------------------------------------------------------------------------------------------------------------------------------------------------------------------------------------------------------------------------------------------------------------------------------------------------------|

|                                                        |          |   |                                                |   |                                                                                                                              |
|--------------------------------------------------------|----------|---|------------------------------------------------|---|------------------------------------------------------------------------------------------------------------------------------|
| Glycosylphosphatidylinositol (GPI)-anchor biosynthesis | map00563 | 1 | ec:2.4.1.198 - N-acetylglucosaminyltransferase | 2 | vo_c3_Locus_15749_Transcript_2/2_Confidence_0.000_Length_1608, vo_n1_Locus_27865_Transcript_1/1_Confidence_0.000_Length_1578 |
| Neomycin, kanamycin and gentamicin biosynthesis        | map00524 | 1 | ec:2.7.1.2 - glucokinase (phosphorylating)     | 2 | tri_c_comp10536_c0_seq1, vo_c2_Locus_32726_Transcript_2/2_Confidence_0.000_Length_696                                        |
| Stilbenoid, diarylheptanoid and gingerol biosynthesis  | map00945 | 1 | ec:2.1.1.104 - O-methyltransferase             | 2 | vo_n2_Locus_30574_Transcript_4/4_Confidence_0.000_Length_969, vo_n2_Locus_30574_Transcript_3/4_Confidence_0.500_Length_827   |
| Atrazine degradation                                   | map00791 | 1 | ec:3.5.1.5 - urease                            | 1 | tri_c_comp36137_c0_seq1                                                                                                      |

|                                           |          |   |                         |   |                                                               |
|-------------------------------------------|----------|---|-------------------------|---|---------------------------------------------------------------|
| Penicillin and cephalosporin biosynthesis | map00311 | 1 | ec:1.4.3.3 - oxidase    | 1 | vo_n2_Locus_26350_Transcript_7/9_Confidence_0.231_Length_1309 |
| Bisphenol degradation                     | map00363 | 1 | ec:3.1.1.2 - A-esterase | 1 | vo_c1_Locus_5656_Transcript_1/2_Confidence_0.333_Length_1233  |

|                        |          |   |                          |    |                                                                                                                                                                                                                                                                                                                                                                                                                                                                                                                                                                                                                                                                                                                                                                                                                                                                                                                                                                            |
|------------------------|----------|---|--------------------------|----|----------------------------------------------------------------------------------------------------------------------------------------------------------------------------------------------------------------------------------------------------------------------------------------------------------------------------------------------------------------------------------------------------------------------------------------------------------------------------------------------------------------------------------------------------------------------------------------------------------------------------------------------------------------------------------------------------------------------------------------------------------------------------------------------------------------------------------------------------------------------------------------------------------------------------------------------------------------------------|
| Aflatoxin biosynthesis | map00254 | 1 | ec:6.4.1.2 - carboxylase | 16 | <p>vo_n3_Locus_484_Transcript_6/12_Confidence_0.250_Length_1533, vo_c3_Locus_17332_Transcript_1/1_Confidence_0.333_Length_6493, vo_n3_Locus_696_Transcript_20/35_Confidence_0.473_Length_5396, vo_c3_Locus_2164_Transcript_38/39_Confidence_0.292_Length_6879, tri_n_comp41552_c0_seq1, vo_c2_Locus_1509_Transcript_1/47_Confidence_0.149_Length_2731, vo_c2_Locus_2193_Transcript_1/3_Confidence_0.667_Length_1218, vo_c1_Locus_860_Transcript_10/29_Confidence_0.571_Length_6744, vo_c2_Locus_1509_Transcript_11/47_Confidence_0.164_Length_2686, vo_n2_Locus_1751_Transcript_51/59_Confidence_0.207_Length_3566, vo_n2_Locus_15097_Transcript_1/1_Confidence_0.000_Length_3935, vo_n3_Locus_484_Transcript_5/12_Confidence_0.250_Length_1451, vo_c1_Locus_860_Transcript_11/29_Confidence_0.571_Length_6741, tri_c_comp19913_c0_seq3, vo_n2_Locus_1751_Transcript_37/59_Confidence_0.195_Length_3437, vo_c2_Locus_1509_Transcript_6/47_Confidence_0.149_Length_2592</p> |
|------------------------|----------|---|--------------------------|----|----------------------------------------------------------------------------------------------------------------------------------------------------------------------------------------------------------------------------------------------------------------------------------------------------------------------------------------------------------------------------------------------------------------------------------------------------------------------------------------------------------------------------------------------------------------------------------------------------------------------------------------------------------------------------------------------------------------------------------------------------------------------------------------------------------------------------------------------------------------------------------------------------------------------------------------------------------------------------|

|                                  |          |   |                                      |   |                                                                                                                                                                                          |
|----------------------------------|----------|---|--------------------------------------|---|------------------------------------------------------------------------------------------------------------------------------------------------------------------------------------------|
| Secondary bile acid biosynthesis | map00121 | 1 | ec:1.1.1.201 - dehydrogenase (NADP+) | 1 | vo_c1_Locus_2815_Transcript_3/4_Confidence_0.200_Length_2244                                                                                                                             |
| Diterpenoid biosynthesis         | map00904 | 1 | ec:1.14.11.13 - 2beta-dioxygenase    | 2 | vo_n1_Locus_5731_Transcript_4/4_Confidence_0.000_Length_912, vo_c2_Locus_31803_Transcript_1/2_Confidence_0.750_Length_1130                                                               |
| Melanogenesis                    | map04916 | 1 | ec:5.3.3.12 - isomerase              | 3 | vo_c2_Locus_19107_Transcript_2/4_Confidence_0.571_Length_752, vo_c1_Locus_20614_Transcript_4/6_Confidence_0.273_Length_420, vo_c2_Locus_19107_Transcript_1/4_Confidence_0.571_Length_831 |



|                            |          |   |                            |   |                                                                                                                                                                                                                                                                                                                                                |
|----------------------------|----------|---|----------------------------|---|------------------------------------------------------------------------------------------------------------------------------------------------------------------------------------------------------------------------------------------------------------------------------------------------------------------------------------------------|
| Glucosinolate biosynthesis | map00966 | 1 | ec:2.6.1.42 - transaminase | 6 | vo_c2_Locus_384_Transcript_2/3_Confidence_0.400_Length_1725, tri_c_comp32679_c0_seq1, vo_c1_Locus_10788_Transcript_1/1_Confidence_0.000_Length_1721, vo_c2_Locus_14969_Transcript_4/8_Confidence_0.750_Length_1231, vo_n2_Locus_3786_Transcript_2/4_Confidence_0.778_Length_1466, vo_n2_Locus_3786_Transcript_3/4_Confidence_0.667_Length_1442 |
|----------------------------|----------|---|----------------------------|---|------------------------------------------------------------------------------------------------------------------------------------------------------------------------------------------------------------------------------------------------------------------------------------------------------------------------------------------------|

|                                      |          |   |                                 |   |                                                                                                                                                                                                                                                                                                                                                                                                                                      |
|--------------------------------------|----------|---|---------------------------------|---|--------------------------------------------------------------------------------------------------------------------------------------------------------------------------------------------------------------------------------------------------------------------------------------------------------------------------------------------------------------------------------------------------------------------------------------|
| Cutin, suberine and wax biosynthesis | map00073 | 1 | ec:2.3.1.20 - O-acyltransferase | 8 | vo_c2_Locus_1239_Transcript_4/4_Confidence_0.000_Length_1343, vo_n1_Locus_12743_Transcript_2/2_Confidence_0.000_Length_633, tri_c_comp9226_c0_seq1, tri_n_comp38992_c0_seq1, vo_n3_Locus_16690_Transcript_3/4_Confidence_0.667_Length_408, vo_n2_Locus_19192_Transcript_2/2_Confidence_0.250_Length_3053, vo_c2_Locus_16114_Transcript_1/1_Confidence_0.000_Length_1890, vo_n1_Locus_1454_Transcript_3/3_Confidence_0.000_Length_612 |
|--------------------------------------|----------|---|---------------------------------|---|--------------------------------------------------------------------------------------------------------------------------------------------------------------------------------------------------------------------------------------------------------------------------------------------------------------------------------------------------------------------------------------------------------------------------------------|

|                            |          |   |                                        |    |                                                                                                                                                                                                                                                                                                                                                                                                                                                                                                                                                                                                                                                                                                                                                                                                                                                                                                                                                                                                                                                                                                                                                                                                                                                                                                                                                                                                                                                                      |
|----------------------------|----------|---|----------------------------------------|----|----------------------------------------------------------------------------------------------------------------------------------------------------------------------------------------------------------------------------------------------------------------------------------------------------------------------------------------------------------------------------------------------------------------------------------------------------------------------------------------------------------------------------------------------------------------------------------------------------------------------------------------------------------------------------------------------------------------------------------------------------------------------------------------------------------------------------------------------------------------------------------------------------------------------------------------------------------------------------------------------------------------------------------------------------------------------------------------------------------------------------------------------------------------------------------------------------------------------------------------------------------------------------------------------------------------------------------------------------------------------------------------------------------------------------------------------------------------------|
| Biosynthesis of ansamycins | map01051 | 1 | ec:2.2.1.1 - glycolaldehydetransferase | 24 | <p>vo_c3_Locus_1314_Transcript_17/46_Confidence_0.365_Length_2530, vo_n3_Locus_387_Transcript_34/39_Confidence_0.386_Length_2514, vo_c2_Locus_924_Transcript_20/40_Confidence_0.452_Length_2520, vo_c2_Locus_924_Transcript_13/40_Confidence_0.310_Length_2559, vo_c3_Locus_1314_Transcript_33/46_Confidence_0.292_Length_2524, vo_c1_Locus_1204_Transcript_14/17_Confidence_0.394_Length_4476, vo_c2_Locus_924_Transcript_19/40_Confidence_0.333_Length_2562, vo_n1_Locus_327_Transcript_13/41_Confidence_0.275_Length_2480, vo_c3_Locus_1314_Transcript_6/46_Confidence_0.208_Length_1518, vo_n1_Locus_327_Transcript_40/41_Confidence_0.176_Length_2442, vo_c3_Locus_1314_Transcript_38/46_Confidence_0.302_Length_2522, vo_c2_Locus_924_Transcript_34/40_Confidence_0.369_Length_2618, vo_c3_Locus_1314_Transcript_14/46_Confidence_0.229_Length_3828, vo_c2_Locus_924_Transcript_16/40_Confidence_0.321_Length_2559, vo_c2_Locus_924_Transcript_23/40_Confidence_0.488_Length_2850, vo_c3_Locus_1314_Transcript_21/46_Confidence_0.365_Length_2524, vo_c1_Locus_1204_Transcript_13/17_Confidence_0.364_Length_4497, vo_n1_Locus_327_Transcript_24/41_Confidence_0.385_Length_2547, vo_c2_Locus_924_Transcript_17/40_Confidence_0.333_Length_2453, tri_c_comp20608_c0_seq4, tri_c_comp20608_c0_seq5, vo_c3_Locus_1314_Transcript_43/46_Confidence_0.198_Length_2519, vo_n2_Locus_2054_Transcript_26/37_Confidence_0.448_Length_2522, tri_c_comp20608_c0_seq7</p> |
|----------------------------|----------|---|----------------------------------------|----|----------------------------------------------------------------------------------------------------------------------------------------------------------------------------------------------------------------------------------------------------------------------------------------------------------------------------------------------------------------------------------------------------------------------------------------------------------------------------------------------------------------------------------------------------------------------------------------------------------------------------------------------------------------------------------------------------------------------------------------------------------------------------------------------------------------------------------------------------------------------------------------------------------------------------------------------------------------------------------------------------------------------------------------------------------------------------------------------------------------------------------------------------------------------------------------------------------------------------------------------------------------------------------------------------------------------------------------------------------------------------------------------------------------------------------------------------------------------|

|                         |          |   |                        |   |                                                               |
|-------------------------|----------|---|------------------------|---|---------------------------------------------------------------|
| Carbapenem biosynthesis | map00332 | 1 | ec:2.7.2.11 - 5-kinase | 1 | vo_c2_Locus_12865_Transcript_1/3_Confidence_0.667_Length_1839 |
|-------------------------|----------|---|------------------------|---|---------------------------------------------------------------|

**Supplemental Table S8. BUSCO analysis results.** Lineage dataset eukariota\_odb9 was used. Out of 303 BUSCOs 68.4% complete entries were identified (44.6% single and 23.8% duplicated) and 4.0% were detected as fragments.

| # Busco id  | Status     | Sequence                                                            | Score  | Length |
|-------------|------------|---------------------------------------------------------------------|--------|--------|
| EOG0937004M | Complete   | tri_n_comp28287_c0_seq1                                             | 3561.9 | 1998   |
| EOG09370082 | Complete   | vo_n2_Locus_1536_Transcript_2_3_Confidence_0.400_<br>Length_9999    | 1442.8 | 1309   |
| EOG093700N7 | Missing    |                                                                     |        |        |
| EOG0937017X | Duplicated | vo_c2_Locus_12179_Transcript_1_3_Confidence_0.750_<br>_Length_3821  | 731.4  | 1141   |
| EOG0937017X | Duplicated | vo_n1_Locus_32615_Transcript_1_1_Confidence_0.000_<br>_Length_3822  | 672.9  | 1130   |
| EOG0937017X | Duplicated | vo_n1_Locus_6757_Transcript_2_2_Confidence_0.000_<br>Length_3945    | 722.2  | 1152   |
| EOG0937018Z | Complete   | vo_c3_Locus_15719_Transcript_1_2_Confidence_0.333_<br>_Length_3591  | 876.6  | 886    |
| EOG0937019B | Duplicated | tri_c_comp19738_c0_seq1                                             | 1395.3 | 834    |
| EOG0937019B | Duplicated | vo_c2_Locus_12608_Transcript_10_13_Confidence_0.4<br>72_Length_3456 | 1395.2 | 830    |
| EOG0937019B | Duplicated | vo_c3_Locus_22919_Transcript_2_3_Confidence_0.471_<br>_Length_3607  | 1388.3 | 834    |
| EOG093701EE | Duplicated | tri_c_comp51602_c0_seq1                                             | 723.9  | 788    |
| EOG093701EE | Duplicated | vo_n2_Locus_13218_Transcript_3_4_Confidence_0.375_<br>_Length_5213  | 672.1  | 800    |
| EOG093701IQ | Complete   | tri_c_comp17782_c0_seq3                                             | 512.8  | 380    |
| EOG093701S0 | Complete   | vo_n2_Locus_3662_Transcript_1_1_Confidence_0.667_<br>Length_3532    | 1033.7 | 692    |
| EOG093701SQ | Complete   | vo_n2_Locus_4121_Transcript_4_4_Confidence_0.167_<br>Length_4300    | 1212.2 | 877    |
| EOG093701V7 | Complete   | vo_n2_Locus_8676_Transcript_1_2_Confidence_0.750_<br>Length_3354    | 885.7  | 688    |
| EOG0937029K | Complete   | vo_c3_Locus_19859_Transcript_1_1_Confidence_0.000_<br>_Length_3251  | 215.3  | 425    |
| EOG093702AT | Complete   | tri_n_comp34787_c0_seq1                                             | 475.8  | 477    |
| EOG093702DP | Duplicated | vo_c2_Locus_1147_Transcript_1_2_Confidence_0.750_<br>Length_1828    | 163.4  | 361    |
| EOG093702DP | Duplicated | vo_c3_Locus_11479_Transcript_1_2_Confidence_1.000_<br>_Length_1915  | 181.7  | 361    |
| EOG093702MJ | Duplicated | vo_c2_Locus_1219_Transcript_31_32_Confidence_0.12<br>3_Length_3127  | 114.8  | 433    |
| EOG093702MJ | Duplicated | vo_n2_Locus_553_Transcript_3_18_Confidence_0.077_<br>Length_3029    | 114.9  | 433    |
| EOG093702PE | Complete   | vo_n1_Locus_3390_Transcript_2_3_Confidence_0.400_<br>Length_4401    | 175.0  | 407    |
| EOG0937033T | Complete   | tri_c_comp47897_c0_seq1                                             | 307.7  | 461    |
| EOG0937036L | Complete   | tri_c_comp27527_c0_seq1                                             | 365.7  | 974    |
| EOG093703C8 | Missing    |                                                                     |        |        |
| EOG093703DY | Complete   | vo_c1_Locus_26649_Transcript_1_2_Confidence_0.333_<br>_Length_2985  | 159.2  | 391    |

|             |            |                                                                   |       |     |
|-------------|------------|-------------------------------------------------------------------|-------|-----|
| EOG093703N5 | Complete   | tri_n_comp57560_c0_seq1                                           | 187.5 | 248 |
| EOG093703UX | Missing    |                                                                   |       |     |
| EOG093703W1 | Missing    |                                                                   |       |     |
| EOG093703WD | Complete   | tri_n_comp40166_c0_seq1                                           | 469.4 | 553 |
| EOG093703YA | Duplicated | vo_n2_Locus_14475_Transcript_1_5_Confidence_0.700<br>_Length_2590 | 632.1 | 519 |
| EOG093703YA | Duplicated | vo_n2_Locus_4619_Transcript_1_1_Confidence_0.000_<br>Length_2377  | 685.6 | 603 |
| EOG0937049Y | Missing    |                                                                   |       |     |
| EOG093704GD | Complete   | vo_c2_Locus_17606_Transcript_1_1_Confidence_0.000<br>_Length_2178 | 298.8 | 455 |
| EOG093704HC | Duplicated | vo_c2_Locus_344_Transcript_2_3_Confidence_0.333_L<br>ength_2699   | 672.9 | 396 |
| EOG093704HC | Duplicated | vo_n2_Locus_4514_Transcript_3_3_Confidence_0.167_<br>Length_5219  | 670.8 | 396 |
| EOG093704J7 | Missing    |                                                                   |       |     |
| EOG093704Q0 | Complete   | tri_c_comp34928_c0_seq1                                           | 406.6 | 430 |
| EOG093704UY | Missing    |                                                                   |       |     |
| EOG0937050C | Complete   | vo_c2_Locus_21699_Transcript_1_2_Confidence_1.000<br>_Length_3034 | 409.6 | 649 |
| EOG093705DM | Complete   | vo_n1_Locus_10149_Transcript_1_1_Confidence_0.000<br>_Length_1299 | 317.6 | 293 |
| EOG093705E5 | Complete   | vo_c1_Locus_3242_Transcript_1_1_Confidence_0.000_<br>Length_2341  | 255.5 | 439 |
| EOG093705EY | Complete   | vo_n2_Locus_14099_Transcript_1_1_Confidence_0.000<br>_Length_2060 | 521.6 | 450 |
| EOG093705KN | Complete   | vo_c3_Locus_2223_Transcript_7_8_Confidence_0.231_<br>Length_3519  | 371.4 | 386 |
| EOG093705U4 | Missing    |                                                                   |       |     |
| EOG093705VV | Complete   | tri_c_comp43285_c0_seq1                                           | 536.0 | 433 |
| EOG093705YA | Duplicated | vo_c3_Locus_19664_Transcript_2_6_Confidence_0.583<br>_Length_2143 | 564.9 | 466 |
| EOG093705YA | Duplicated | vo_c3_Locus_8275_Transcript_2_3_Confidence_0.750_<br>Length_2028  | 659.6 | 536 |
| EOG093705YE | Duplicated | vo_c2_Locus_14_Transcript_9_23_Confidence_0.077_L<br>ength_3444   | 62.6  | 228 |
| EOG093705YE | Duplicated | vo_n1_Locus_949_Transcript_2_4_Confidence_0.286_L<br>ength_2270   | 55.2  | 286 |
| EOG093705Z6 | Missing    |                                                                   |       |     |
| EOG0937060I | Duplicated | vo_c2_Locus_18064_Transcript_1_1_Confidence_0.333<br>_Length_2385 | 514.1 | 617 |
| EOG0937060I | Duplicated | vo_n2_Locus_7639_Transcript_1_1_Confidence_0.000_<br>Length_3449  | 582.6 | 618 |
| EOG0937060I | Duplicated | vo_n3_Locus_16518_Transcript_1_1_Confidence_0.000<br>_Length_2956 | 548.7 | 676 |
| EOG0937066G | Duplicated | tri_n_comp27405_c0_seq1                                           | 530.7 | 411 |
| EOG0937066G | Duplicated | vo_c1_Locus_5594_Transcript_1_2_Confidence_0.500_<br>Length_3744  | 526.8 | 411 |
| EOG0937066G | Duplicated | vo_c1_Locus_5594_Transcript_1_2_Confidence_0.500_<br>Length_3744  | 527.0 | 411 |
| EOG0937066G | Duplicated | vo_c2_Locus_17209_Transcript_1_2_Confidence_0.750<br>_Length_2003 | 532.1 | 431 |

|             |            |                                                                    |       |     |
|-------------|------------|--------------------------------------------------------------------|-------|-----|
| EOG0937068H | Duplicated | tri_c_comp25244_c0_seq1                                            | 257.3 | 404 |
| EOG0937068H | Duplicated | tri_c_comp33097_c0_seq1                                            | 231.7 | 405 |
| EOG093706PM | Complete   | vo_c1_Locus_13782_Transcript_1_2_Confidence_0.333<br>_Length_2472  | 333.0 | 298 |
| EOG093706RN | Complete   | vo_n3_Locus_14997_Transcript_1_1_Confidence_0.000<br>_Length_2574  | 217.7 | 416 |
| EOG093706X0 | Duplicated | vo_c3_Locus_7772_Transcript_3_6_Confidence_0.600_<br>Length_1899   | 122.6 | 295 |
| EOG093706X0 | Duplicated | vo_c3_Locus_7772_Transcript_4_6_Confidence_0.500_<br>Length_1937   | 122.5 | 295 |
| EOG093706X0 | Duplicated | vo_n2_Locus_4706_Transcript_4_7_Confidence_0.308_<br>Length_2684   | 136.4 | 354 |
| EOG09370762 | Complete   | vo_c3_Locus_107_Transcript_2_2_Confidence_0.000_L<br>ength_1878    | 698.5 | 486 |
| EOG093707B7 | Complete   | tri_n_comp29647_c0_seq1                                            | 182.0 | 418 |
| EOG093707HK | Complete   | vo_n2_Locus_2003_Transcript_2_2_Confidence_0.250_<br>Length_2177   | 301.1 | 483 |
| EOG093707LO | Complete   | tri_c_comp17539_c0_seq5                                            | 225.8 | 400 |
| EOG093707RF | Complete   | vo_c1_Locus_21157_Transcript_2_3_Confidence_0.600<br>_Length_3136  | 280.9 | 439 |
| EOG093707VN | Complete   | vo_c3_Locus_9511_Transcript_1_1_Confidence_0.000_<br>Length_2619   | 348.5 | 407 |
| EOG093707VQ | Complete   | tri_n_comp31257_c0_seq1                                            | 281.6 | 537 |
| EOG0937084T | Complete   | vo_c2_Locus_3047_Transcript_2_4_Confidence_0.286_<br>Length_3515   | 164.6 | 351 |
| EOG0937085E | Complete   | vo_n1_Locus_24686_Transcript_1_1_Confidence_0.000<br>_Length_1774  | 399.6 | 412 |
| EOG093708IM | Complete   | vo_c1_Locus_1424_Transcript_1_1_Confidence_0.000_<br>Length_2064   | 372.3 | 387 |
| EOG093708OP | Missing    |                                                                    |       |     |
| EOG093708TP | Duplicated | vo_n1_Locus_6239_Transcript_19_19_Confidence_0.15<br>0_Length_1856 | 386.1 | 376 |
| EOG093708TP | Duplicated | vo_n1_Locus_6239_Transcript_3_19_Confidence_0.425<br>_Length_1997  | 387.3 | 378 |
| EOG093708TP | Duplicated | vo_n3_Locus_2366_Transcript_13_24_Confidence_0.23<br>6_Length_1948 | 387.9 | 380 |
| EOG0937091Y | Complete   | vo_c1_Locus_1184_Transcript_9_10_Confidence_0.357<br>_Length_2595  | 580.4 | 518 |
| EOG0937092T | Missing    |                                                                    |       |     |
| EOG0937092W | Complete   | vo_c2_Locus_3336_Transcript_1_1_Confidence_0.333_<br>Length_2657   | 288.6 | 463 |
| EOG093709BZ | Duplicated | tri_c_comp30439_c0_seq1                                            | 126.8 | 400 |
| EOG093709BZ | Duplicated | vo_c1_Locus_27004_Transcript_1_1_Confidence_0.000<br>_Length_2081  | 128.7 | 381 |
| EOG093709HP | Complete   | tri_c_comp52375_c0_seq1                                            | 144.7 | 331 |
| EOG093709JG | Complete   | vo_n2_Locus_28120_Transcript_1_1_Confidence_0.000<br>_Length_2388  | 80.7  | 256 |
| EOG09370A22 | Duplicated | vo_c3_Locus_15749_Transcript_2_2_Confidence_0.000<br>_Length_1608  | 451.2 | 350 |
| EOG09370A22 | Duplicated | vo_n1_Locus_27865_Transcript_1_1_Confidence_0.000<br>_Length_1578  | 451.8 | 350 |

|             |            |                                                                    |       |     |
|-------------|------------|--------------------------------------------------------------------|-------|-----|
| EOG09370ADO | Duplicated | vo_c2_Locus_1983_Transcript_1_4_Confidence_0.714_<br>Length_1572   | 579.3 | 381 |
| EOG09370ADO | Duplicated | vo_n3_Locus_2382_Transcript_1_2_Confidence_1.000_<br>Length_1689   | 671.8 | 422 |
| EOG09370AI8 | Complete   | vo_c3_Locus_12888_Transcript_1_1_Confidence_0.000_<br>_Length_1609 | 250.3 | 246 |
| EOG09370AJP | Complete   | vo_n1_Locus_6460_Transcript_1_1_Confidence_0.000_<br>Length_1912   | 540.7 | 398 |
| EOG09370AL3 | Duplicated | vo_c1_Locus_25304_Transcript_1_1_Confidence_0.000_<br>_Length_1848 | 332.1 | 366 |
| EOG09370AL3 | Duplicated | vo_n2_Locus_4701_Transcript_2_2_Confidence_0.000_<br>Length_1858   | 308.1 | 366 |
| EOG09370ARO | Missing    |                                                                    |       |     |
| EOG09370AS9 | Complete   | vo_c1_Locus_1681_Transcript_2_6_Confidence_0.500_<br>Length_2477   | 167.9 | 294 |
| EOG09370AV1 | Complete   | vo_n1_Locus_964_Transcript_1_1_Confidence_0.000_L<br>ength_1596    | 134.4 | 296 |
| EOG09370AWB | Missing    |                                                                    |       |     |
| EOG09370B1L | Complete   | vo_n3_Locus_15336_Transcript_1_1_Confidence_0.000_<br>_Length_1810 | 402.0 | 408 |
| EOG09370B65 | Missing    |                                                                    |       |     |
| EOG09370B7D | Duplicated | vo_c2_Locus_18469_Transcript_7_11_Confidence_0.42<br>9_Length_1816 | 127.8 | 146 |
| EOG09370B7D | Duplicated | vo_c2_Locus_18469_Transcript_9_11_Confidence_0.21<br>4_Length_1549 | 141.0 | 165 |
| EOG09370BBR | Complete   | tri_c_comp27551_c0_seq1                                            | 550.1 | 340 |
| EOG09370BGO | Duplicated | vo_c1_Locus_10425_Transcript_2_3_Confidence_0.667<br>_Length_2502  | 48.3  | 191 |
| EOG09370BGO | Duplicated | vo_c2_Locus_1193_Transcript_3_9_Confidence_0.588_<br>Length_5761   | 44.8  | 191 |
| EOG09370BGO | Duplicated | vo_c2_Locus_1193_Transcript_4_9_Confidence_0.588_<br>Length_5737   | 44.8  | 191 |
| EOG09370BJE | Duplicated | tri_n_comp27390_c0_seq1                                            | 343.5 | 296 |
| EOG09370BJE | Duplicated | vo_n1_Locus_11298_Transcript_1_3_Confidence_0.833<br>_Length_2343  | 343.6 | 296 |
| EOG09370BJE | Duplicated | vo_n3_Locus_1440_Transcript_3_5_Confidence_0.231_<br>Length_3420   | 345.5 | 255 |
| EOG09370BK5 | Missing    |                                                                    |       |     |
| EOG09370BQO | Missing    |                                                                    |       |     |
| EOG09370BYX | Duplicated | tri_n_comp12418_c0_seq1                                            | 25.6  | 334 |
| EOG09370BYX | Duplicated | tri_n_comp12418_c0_seq2                                            | 25.3  | 333 |
| EOG09370C5A | Complete   | vo_n2_Locus_12673_Transcript_1_1_Confidence_0.000_<br>_Length_1679 | 140.2 | 433 |
| EOG09370CAN | Missing    |                                                                    |       |     |
| EOG09370CAV | Complete   | vo_c2_Locus_15048_Transcript_2_3_Confidence_0.333_<br>_Length_3467 | 337.9 | 511 |
| EOG09370CF1 | Missing    |                                                                    |       |     |
| EOG09370CIV | Duplicated | tri_n_comp9789_c0_seq1                                             | 145.8 | 241 |
| EOG09370CIV | Duplicated | tri_n_comp9789_c0_seq2                                             | 145.9 | 241 |
| EOG09370CIV | Duplicated | vo_n2_Locus_1288_Transcript_4_8_Confidence_0.265_<br>Length_1902   | 146.1 | 241 |
| EOG09370CK6 | Missing    |                                                                    |       |     |



|             |            |                                                   |       |     |
|-------------|------------|---------------------------------------------------|-------|-----|
| EOG09370CKL | Missing    |                                                   |       |     |
|             |            | vo_n2_Locus_17117_Transcript_1_1_Confidence_0.000 |       |     |
| EOG09370CRF | Complete   | _Length_1585                                      | 322.5 | 352 |
| EOG09370CTU | Missing    |                                                   |       |     |
|             |            | vo_c2_Locus_25768_Transcript_1_1_Confidence_0.000 |       |     |
| EOG09370CZ0 | Complete   | _Length_1551                                      | 200.6 | 214 |
|             |            | vo_c3_Locus_18882_Transcript_1_1_Confidence_0.000 |       |     |
| EOG09370CZT | Complete   | _Length_3621                                      | 119.3 | 205 |
|             |            | vo_n2_Locus_7930_Transcript_11_23_Confidence_0.45 |       |     |
| EOG09370D13 | Duplicated | 5_Length_3963                                     | 208.0 | 377 |
|             |            | vo_n2_Locus_7930_Transcript_12_23_Confidence_0.36 |       |     |
| EOG09370D13 | Duplicated | 4_Length_3996                                     | 208.0 | 377 |
|             |            | vo_n2_Locus_7930_Transcript_9_23_Confidence_0.485 |       |     |
| EOG09370D13 | Duplicated | _Length_4050                                      | 207.9 | 377 |
|             |            | vo_c1_Locus_5647_Transcript_1_3_Confidence_0.600_ |       |     |
| EOG09370DO5 | Complete   | Length_3208                                       | 150.5 | 284 |
|             |            | vo_n1_Locus_7772_Transcript_1_1_Confidence_0.000_ |       |     |
| EOG09370DP4 | Fragmented | Length_6986                                       | 23.7  | 98  |
| EOG09370DS4 | Missing    |                                                   |       |     |
|             |            | vo_c1_Locus_24563_Transcript_5_7_Confidence_0.127 |       |     |
| EOG09370DTG | Fragmented | _Length_2200                                      | 74.7  | 207 |
|             |            | vo_n2_Locus_6078_Transcript_6_7_Confidence_0.600_ |       |     |
| EOG09370DV4 | Duplicated | Length_2112                                       | 345.3 | 324 |
|             |            | vo_n2_Locus_6078_Transcript_7_7_Confidence_0.300_ |       |     |
| EOG09370DV4 | Duplicated | Length_2132                                       | 345.3 | 324 |
| EOG09370DX4 | Missing    |                                                   |       |     |
| EOG09370DXT | Missing    |                                                   |       |     |
| EOG09370DYK | Duplicated | tri_n_comp6202_c0_seq1                            | 152.0 | 209 |
| EOG09370DYK | Duplicated | tri_n_comp6202_c0_seq2                            | 137.2 | 209 |
|             |            | vo_n1_Locus_3026_Transcript_2_3_Confidence_0.400_ |       |     |
| EOG09370E0Y | Duplicated | Length_2292                                       | 424.0 | 339 |
|             |            | vo_n2_Locus_13581_Transcript_1_1_Confidence_0.000 |       |     |
| EOG09370E0Y | Duplicated | _Length_1796                                      | 425.5 | 339 |
| EOG09370E36 | Missing    |                                                   |       |     |
|             |            | vo_n1_Locus_690_Transcript_69_127_Confidence_0.01 |       |     |
| EOG09370E4U | Complete   | 1_Length_1601                                     | 302.3 | 239 |
| EOG09370E4W | Complete   | tri_n_comp23997_c0_seq1                           | 259.7 | 281 |
| EOG09370E8S | Complete   | tri_n_comp31892_c0_seq1                           | 211.2 | 267 |
|             |            | vo_n1_Locus_24951_Transcript_1_2_Confidence_0.750 |       |     |
| EOG09370EHZ | Duplicated | _Length_1980                                      | 349.0 | 395 |
|             |            | vo_n1_Locus_24951_Transcript_2_2_Confidence_0.000 |       |     |
| EOG09370EHZ | Duplicated | _Length_2025                                      | 348.9 | 395 |
| EOG09370EL3 | Missing    |                                                   |       |     |
|             |            | vo_n2_Locus_35831_Transcript_1_1_Confidence_0.000 |       |     |
| EOG09370ER5 | Complete   | _Length_2496                                      | 237.2 | 323 |
|             |            | vo_n1_Locus_18911_Transcript_2_2_Confidence_0.333 |       |     |
| EOG09370F1Q | Complete   | _Length_1516                                      | 70.1  | 123 |
| EOG09370F3T | Missing    |                                                   |       |     |
|             |            | vo_n3_Locus_26739_Transcript_1_1_Confidence_0.000 |       |     |
| EOG09370F47 | Complete   | _Length_1382                                      | 413.4 | 265 |
| EOG09370FKI | Missing    |                                                   |       |     |
| EOG09370FLD | Missing    |                                                   |       |     |

|             |            |                                                                    |       |     |
|-------------|------------|--------------------------------------------------------------------|-------|-----|
| EOG09370FN1 | Duplicated | vo_c1_Locus_799_Transcript_1_12_Confidence_0.423_<br>Length_1663   | 390.7 | 312 |
| EOG09370FN1 | Duplicated | vo_c3_Locus_3850_Transcript_7_16_Confidence_0.250<br>_Length_1369  | 390.8 | 279 |
| EOG09370FN1 | Duplicated | vo_n1_Locus_1510_Transcript_4_24_Confidence_0.208<br>_Length_1370  | 392.5 | 320 |
| EOG09370FSS | Complete   | vo_c3_Locus_26616_Transcript_1_1_Confidence_0.000<br>_Length_1783  | 122.6 | 247 |
| EOG09370FVX | Complete   | tri_n_comp38078_c0_seq1                                            | 238.7 | 298 |
| EOG09370FWQ | Duplicated | tri_n_comp41542_c0_seq1                                            | 373.4 | 311 |
| EOG09370FWQ | Duplicated | vo_c2_Locus_1588_Transcript_1_1_Confidence_0.000_<br>Length_1316   | 375.5 | 311 |
| EOG09370FXE | Missing    |                                                                    |       |     |
| EOG09370GC2 | Complete   | vo_n1_Locus_23038_Transcript_2_3_Confidence_0.400<br>_Length_2942  | 78.6  | 152 |
| EOG09370GEO | Complete   | vo_c3_Locus_20979_Transcript_2_3_Confidence_0.400<br>_Length_1639  | 79.0  | 158 |
| EOG09370GHM | Duplicated | vo_c1_Locus_1120_Transcript_3_11_Confidence_0.500<br>_Length_3021  | 164.8 | 201 |
| EOG09370GHM | Duplicated | vo_c1_Locus_1120_Transcript_6_11_Confidence_0.333<br>_Length_2994  | 164.8 | 201 |
| EOG09370GHM | Duplicated | vo_c1_Locus_3540_Transcript_1_1_Confidence_0.000_<br>Length_2284   | 186.7 | 223 |
| EOG09370GHP | Missing    |                                                                    |       |     |
| EOG09370GIK | Duplicated | vo_c1_Locus_20849_Transcript_1_1_Confidence_0.000<br>_Length_1120  | 303.4 | 215 |
| EOG09370GIK | Duplicated | vo_c2_Locus_30999_Transcript_2_2_Confidence_0.000<br>_Length_1165  | 283.8 | 218 |
| EOG09370GJ7 | Complete   | tri_n_comp29754_c0_seq1                                            | 328.0 | 342 |
| EOG09370GK0 | Missing    |                                                                    |       |     |
| EOG09370H3E | Complete   | vo_c2_Locus_703_Transcript_1_2_Confidence_0.333_L<br>ength_2334    | 306.4 | 461 |
| EOG09370H68 | Complete   | tri_n_comp4523_c0_seq1                                             | 68.0  | 215 |
| EOG09370HBN | Fragmented | vo_c2_Locus_16306_Transcript_1_1_Confidence_0.000<br>_Length_1112  | 109.7 | 153 |
| EOG09370HD7 | Missing    |                                                                    |       |     |
| EOG09370HKV | Duplicated | vo_c2_Locus_19754_Transcript_2_3_Confidence_0.500<br>_Length_1997  | 141.1 | 318 |
| EOG09370HKV | Duplicated | vo_n2_Locus_4167_Transcript_1_6_Confidence_0.667_<br>Length_2035   | 150.6 | 328 |
| EOG09370HVI | Complete   | vo_n2_Locus_7479_Transcript_1_1_Confidence_0.000_<br>Length_1358   | 115.3 | 190 |
| EOG09370I3J | Duplicated | tri_c_comp16401_c0_seq2                                            | 191.8 | 213 |
| EOG09370I3J | Duplicated | tri_c_comp16401_c0_seq4                                            | 190.0 | 208 |
| EOG09370I3J | Duplicated | tri_c_comp16401_c0_seq5                                            | 191.6 | 213 |
| EOG09370I7R | Missing    |                                                                    |       |     |
| EOG09370IF5 | Complete   | tri_c_comp25586_c0_seq1                                            | 277.7 | 274 |
| EOG09370IH5 | Fragmented | vo_c3_Locus_7546_Transcript_3_14_Confidence_0.529<br>_Length_1389  | 35.5  | 103 |
| EOG09370IMU | Complete   | vo_c2_Locus_10633_Transcript_7_19_Confidence_0.44<br>8_Length_1346 | 59.8  | 164 |
| EOG09370INZ | Complete   | tri_c_comp10311_c0_seq1                                            | 198.5 | 280 |

|             |            |                                                                    |       |     |
|-------------|------------|--------------------------------------------------------------------|-------|-----|
| EOG09370IUA | Complete   | vo_c3_Locus_1134_Transcript_1_1_Confidence_0.000_<br>Length_1398   | 300.9 | 205 |
| EOG09370J9L | Complete   | vo_n2_Locus_27499_Transcript_1_1_Confidence_0.000_<br>_Length_4654 | 107.0 | 182 |
| EOG09370JIK | Missing    |                                                                    |       |     |
| EOG09370JW6 | Missing    |                                                                    |       |     |
| EOG09370JZ3 | Missing    |                                                                    |       |     |
| EOG09370K15 | Missing    |                                                                    |       |     |
| EOG09370K1R | Complete   | vo_c3_Locus_1766_Transcript_1_1_Confidence_0.000_<br>Length_1152   | 146.1 | 205 |
| EOG09370KD4 | Complete   | vo_n1_Locus_20507_Transcript_1_2_Confidence_0.667_<br>_Length_1235 | 359.2 | 236 |
| EOG09370KGV | Complete   | tri_n_comp28286_c0_seq1                                            | 113.5 | 169 |
| EOG09370KJ3 | Complete   | vo_c3_Locus_15650_Transcript_1_1_Confidence_0.000_<br>_Length_1033 | 180.6 | 168 |
| EOG09370KM9 | Complete   | vo_n3_Locus_17035_Transcript_1_1_Confidence_0.000_<br>_Length_2586 | 117.3 | 232 |
| EOG09370KOV | Fragmented | vo_n1_Locus_26419_Transcript_1_1_Confidence_0.000_<br>_Length_1111 | 90.8  | 118 |
| EOG09370KWF | Missing    |                                                                    |       |     |
| EOG09370KYZ | Missing    |                                                                    |       |     |
| EOG09370L23 | Duplicated | vo_c3_Locus_18494_Transcript_5_9_Confidence_0.667_<br>_Length_1652 | 272.0 | 213 |
| EOG09370L23 | Duplicated | vo_n1_Locus_21388_Transcript_1_4_Confidence_0.667_<br>_Length_1107 | 281.3 | 218 |
| EOG09370L23 | Duplicated | vo_n1_Locus_21388_Transcript_2_4_Confidence_0.500_<br>_Length_1146 | 264.1 | 218 |
| EOG09370L77 | Missing    |                                                                    |       |     |
| EOG09370LFI | Duplicated | vo_c1_Locus_9447_Transcript_1_1_Confidence_0.000_<br>Length_1221   | 304.2 | 205 |
| EOG09370LFI | Duplicated | vo_n3_Locus_17513_Transcript_2_2_Confidence_0.000_<br>_Length_884  | 295.9 | 200 |
| EOG09370LGH | Complete   | tri_n_comp77429_c0_seq1                                            | 247.9 | 280 |
| EOG09370LMP | Complete   | vo_n1_Locus_30418_Transcript_3_3_Confidence_0.000_<br>_Length_1559 | 339.9 | 305 |
| EOG09370LQ2 | Duplicated | vo_c1_Locus_25845_Transcript_1_1_Confidence_0.000_<br>_Length_1224 | 90.7  | 178 |
| EOG09370LQ2 | Duplicated | vo_n2_Locus_22805_Transcript_5_6_Confidence_0.273_<br>_Length_3128 | 85.3  | 178 |
| EOG09370LYY | Complete   | vo_n2_Locus_305_Transcript_1_3_Confidence_0.714_<br>Length_1537    | 128.8 | 430 |
| EOG09370M9E | Complete   | vo_c2_Locus_11139_Transcript_1_1_Confidence_0.000_<br>_Length_1057 | 128.1 | 202 |
| EOG09370MAO | Complete   | vo_c2_Locus_1532_Transcript_2_2_Confidence_0.000_<br>Length_1203   | 244.5 | 232 |
| EOG09370MDU | Duplicated | vo_c3_Locus_6904_Transcript_2_2_Confidence_0.250_<br>Length_1012   | 213.0 | 179 |
| EOG09370MDU | Duplicated | vo_n2_Locus_2814_Transcript_6_6_Confidence_0.444_<br>Length_1020   | 212.9 | 179 |
| EOG09370MGF | Complete   | tri_c_comp32838_c0_seq1                                            | 139.7 | 181 |
| EOG09370MHI | Fragmented | vo_c3_Locus_2992_Transcript_5_11_Confidence_0.213_<br>_Length_1574 | 169.4 | 169 |

|             |            |                                                                    |       |     |
|-------------|------------|--------------------------------------------------------------------|-------|-----|
| EOG09370MMK | Missing    |                                                                    |       |     |
| EOG09370MQ0 | Complete   | vo_n2_Locus_16404_Transcript_1_2_Confidence_1.000<br>_Length_1226  | 231.6 | 213 |
| EOG09370MZ4 | Complete   | vo_n3_Locus_9972_Transcript_1_1_Confidence_0.000_<br>Length_991    | 372.4 | 226 |
| EOG09370N7W | Complete   | vo_c2_Locus_30736_Transcript_1_1_Confidence_0.000<br>_Length_1713  | 31.0  | 165 |
| EOG09370NBT | Complete   | vo_n1_Locus_17235_Transcript_1_2_Confidence_0.333<br>_Length_1228  | 215.2 | 242 |
| EOG09370NBW | Missing    |                                                                    |       |     |
| EOG09370NHX | Complete   | vo_c2_Locus_23277_Transcript_1_1_Confidence_0.000<br>_Length_1058  | 108.9 | 134 |
| EOG09370NIG | Complete   | tri_c_comp52297_c0_seq1                                            | 132.5 | 134 |
| EOG09370O06 | Complete   | vo_n2_Locus_3339_Transcript_1_1_Confidence_0.000_<br>Length_1083   | 127.3 | 195 |
| EOG09370O51 | Complete   | vo_c1_Locus_10206_Transcript_1_2_Confidence_0.667<br>_Length_876   | 234.3 | 196 |
| EOG09370OFR | Complete   | tri_n_comp56132_c0_seq1                                            | 67.5  | 179 |
| EOG09370OGU | Complete   | vo_n2_Locus_6796_Transcript_1_1_Confidence_0.000_<br>Length_1236   | 100.9 | 146 |
| EOG09370OGW | Missing    |                                                                    |       |     |
| EOG09370OHP | Complete   | vo_c3_Locus_32304_Transcript_1_1_Confidence_0.000<br>_Length_1078  | 199.3 | 204 |
| EOG09370OLY | Complete   | vo_n2_Locus_12823_Transcript_1_1_Confidence_0.000<br>_Length_1341  | 172.5 | 162 |
| EOG09370OO3 | Missing    |                                                                    |       |     |
| EOG09370OS5 | Missing    |                                                                    |       |     |
| EOG09370OUS | Missing    |                                                                    |       |     |
| EOG09370P2W | Complete   | tri_c_comp38699_c0_seq1                                            | 77.4  | 97  |
| EOG09370P5Q | Complete   | tri_n_comp62251_c0_seq1                                            | 133.9 | 199 |
| EOG09370P7I | Complete   | vo_c3_Locus_21398_Transcript_1_1_Confidence_0.000<br>_Length_891   | 79.5  | 159 |
| EOG09370P9T | Missing    |                                                                    |       |     |
| EOG09370PBD | Duplicated | vo_c3_Locus_4396_Transcript_5_18_Confidence_0.345<br>_Length_977   | 334.1 | 221 |
| EOG09370PBD | Duplicated | vo_n1_Locus_1534_Transcript_14_27_Confidence_0.22<br>4_Length_935  | 334.7 | 221 |
| EOG09370PBD | Duplicated | vo_n1_Locus_1534_Transcript_16_27_Confidence_0.24<br>1_Length_938  | 335.5 | 221 |
| EOG09370PLC | Complete   | tri_c_comp49730_c0_seq1                                            | 146.7 | 222 |
| EOG09370PN3 | Missing    |                                                                    |       |     |
| EOG09370PYJ | Complete   | tri_c_comp29883_c0_seq1                                            | 289.1 | 217 |
| EOG09370QBK | Complete   | vo_n1_Locus_22998_Transcript_13_14_Confidence_0.5<br>33_Length_983 | 41.3  | 128 |
| EOG09370QBR | Missing    |                                                                    |       |     |
| EOG09370QCX | Complete   | tri_c_comp26027_c0_seq1                                            | 86.4  | 122 |
| EOG09370QFD | Fragmented | tri_n_comp6551_c0_seq1                                             | 40.7  | 113 |
| EOG09370QI4 | Complete   | vo_c1_Locus_8464_Transcript_1_1_Confidence_0.000_<br>Length_1137   | 124.7 | 189 |
| EOG09370QJ1 | Missing    |                                                                    |       |     |
| EOG09370QKS | Missing    |                                                                    |       |     |

|             |            |                                                   |       |     |
|-------------|------------|---------------------------------------------------|-------|-----|
| EOG09370QMM | Missing    |                                                   |       |     |
| EOG09370QT3 | Missing    |                                                   |       |     |
| EOG09370QVI | Missing    |                                                   |       |     |
| EOG09370R3M | Complete   | tri_n_comp22296_c0_seq1                           | 258.2 | 183 |
|             |            | vo_c2_Locus_31589_Transcript_2_2_Confidence_0.000 |       |     |
| EOG09370R67 | Duplicated | _Length_1480                                      | 120.6 | 136 |
|             |            | vo_n2_Locus_21119_Transcript_1_4_Confidence_0.800 |       |     |
| EOG09370R67 | Duplicated | _Length_1427                                      | 120.9 | 136 |
| EOG09370RCD | Missing    |                                                   |       |     |
|             |            | vo_n2_Locus_21967_Transcript_1_1_Confidence_0.000 |       |     |
| EOG09370RCQ | Complete   | _Length_1233                                      | 174.3 | 181 |
|             |            | vo_c3_Locus_3261_Transcript_1_3_Confidence_0.667_ |       |     |
| EOG09370RCS | Complete   | Length_3934                                       | 174.6 | 172 |
| EOG09370RIT | Missing    |                                                   |       |     |
|             |            | vo_c1_Locus_2791_Transcript_1_1_Confidence_0.000_ |       |     |
| EOG09370RJN | Fragmented | Length_1592                                       | 48.6  | 96  |
| EOG09370RRJ | Missing    |                                                   |       |     |
|             |            | vo_c2_Locus_25315_Transcript_1_3_Confidence_0.400 |       |     |
| EOG09370S0F | Complete   | _Length_1033                                      | 79.9  | 114 |
| EOG09370S1Z | Missing    |                                                   |       |     |
| EOG09370S3E | Missing    |                                                   |       |     |
| EOG09370S4T | Missing    |                                                   |       |     |
|             |            | vo_c1_Locus_12548_Transcript_1_3_Confidence_0.571 |       |     |
| EOG09370SC9 | Fragmented | _Length_692                                       | 54.8  | 89  |
| EOG09370SO4 | Missing    |                                                   |       |     |
|             |            | vo_n1_Locus_33361_Transcript_1_3_Confidence_0.400 |       |     |
| EOG09370SON | Complete   | _Length_1225                                      | 88.8  | 137 |
| EOG09370SPQ | Missing    |                                                   |       |     |
|             |            | vo_c1_Locus_9056_Transcript_2_2_Confidence_0.250_ |       |     |
| EOG09370SV2 | Duplicated | Length_907                                        | 91.5  | 127 |
|             |            | vo_c2_Locus_2560_Transcript_3_3_Confidence_0.143_ |       |     |
| EOG09370SV2 | Duplicated | Length_850                                        | 80.8  | 114 |
|             |            | vo_c2_Locus_6435_Transcript_5_6_Confidence_0.032_ |       |     |
| EOG09370SYK | Complete   | Length_7385                                       | 345.7 | 434 |
|             |            | vo_c2_Locus_313_Transcript_5_7_Confidence_0.250_L |       |     |
| EOG09370T6W | Complete   | ength_1589                                        | 162.0 | 166 |
|             |            | vo_c1_Locus_5185_Transcript_6_21_Confidence_0.118 |       |     |
| EOG09370T9R | Complete   | _Length_1734                                      | 204.8 | 156 |
|             |            | vo_n2_Locus_14153_Transcript_1_4_Confidence_0.833 |       |     |
| EOG09370TBD | Duplicated | _Length_970                                       | 218.1 | 135 |
|             |            | vo_n2_Locus_14153_Transcript_2_4_Confidence_0.833 |       |     |
| EOG09370TBD | Duplicated | _Length_1009                                      | 218.0 | 135 |
| EOG09370TBG | Duplicated | tri_c_comp29751_c0_seq1                           | 66.3  | 139 |
|             |            | vo_c1_Locus_22175_Transcript_1_1_Confidence_0.000 |       |     |
| EOG09370TBG | Duplicated | _Length_1063                                      | 72.4  | 119 |
|             |            | vo_c2_Locus_20815_Transcript_5_6_Confidence_0.263 |       |     |
| EOG09370TCX | Duplicated | _Length_1314                                      | 48.2  | 170 |
|             |            | vo_c2_Locus_20815_Transcript_6_6_Confidence_0.158 |       |     |
| EOG09370TCX | Duplicated | _Length_1305                                      | 49.7  | 164 |
|             |            | vo_c3_Locus_2547_Transcript_8_8_Confidence_0.130_ |       |     |
| EOG09370TCX | Duplicated | Length_1319                                       | 51.6  | 170 |

|             |            |                                                                       |       |     |
|-------------|------------|-----------------------------------------------------------------------|-------|-----|
| EOG09370TFO | Complete   | vo_n1_Locus_19361_Transcript_1_2_Confidence_0.333<br>_Length_1454     | 116.2 | 278 |
| EOG09370TG2 | Duplicated | vo_c1_Locus_33182_Transcript_2_3_Confidence_0.250<br>_Length_838      | 163.8 | 149 |
| EOG09370TG2 | Duplicated | vo_n2_Locus_28077_Transcript_1_2_Confidence_0.333<br>_Length_835      | 163.8 | 149 |
| EOG09370TG6 | Complete   | vo_n2_Locus_5069_Transcript_1_1_Confidence_0.000_<br>Length_852       | 152.4 | 130 |
| EOG09370TH4 | Duplicated | tri_n_comp29271_c0_seq1                                               | 129.2 | 117 |
| EOG09370TH4 | Duplicated | vo_n1_Locus_18221_Transcript_2_3_Confidence_0.333<br>_Length_2330     | 127.1 | 117 |
| EOG09370TH4 | Duplicated | vo_n2_Locus_7391_Transcript_1_1_Confidence_0.000_<br>Length_1253      | 129.4 | 117 |
| EOG09370TP2 | Complete   | vo_n2_Locus_10965_Transcript_1_1_Confidence_0.000_<br>_Length_1384    | 134.8 | 211 |
| EOG09370TS7 | Duplicated | tri_c_comp13669_c0_seq1                                               | 53.6  | 130 |
| EOG09370TS7 | Duplicated | tri_c_comp13669_c0_seq2                                               | 54.1  | 130 |
| EOG09370TS7 | Duplicated | vo_n3_Locus_14626_Transcript_1_1_Confidence_0.000_<br>_Length_1061    | 53.7  | 130 |
| EOG09370TTI | Missing    |                                                                       |       |     |
| EOG09370U0A | Duplicated | tri_c_comp25165_c0_seq1                                               | 221.2 | 214 |
| EOG09370U0A | Duplicated | vo_c1_Locus_7619_Transcript_3_5_Confidence_0.222_<br>Length_2303      | 218.5 | 216 |
| EOG09370U0A | Duplicated | vo_n3_Locus_3123_Transcript_2_16_Confidence_0.046<br>_Length_1409     | 221.4 | 214 |
| EOG09370U71 | Duplicated | vo_c1_Locus_18378_Transcript_4_13_Confidence_0.55<br>6_Length_1230    | 132.8 | 195 |
| EOG09370U71 | Duplicated | vo_n2_Locus_7202_Transcript_2_10_Confidence_0.524<br>_Length_1121     | 116.6 | 205 |
| EOG09370U9P | Complete   | vo_n2_Locus_8097_Transcript_1_6_Confidence_0.500_<br>Length_1196      | 133.8 | 170 |
| EOG09370UEC | Missing    |                                                                       |       |     |
| EOG09370UG9 | Duplicated | vo_c2_Locus_17369_Transcript_1_1_Confidence_0.000_<br>_Length_872     | 138.4 | 155 |
| EOG09370UG9 | Duplicated | vo_n2_Locus_7335_Transcript_1_3_Confidence_0.625_<br>Length_757       | 130.0 | 139 |
| EOG09370UID | Duplicated | vo_c1_Locus_5485_Transcript_1_3_Confidence_0.714_<br>Length_983       | 94.8  | 116 |
| EOG09370UID | Duplicated | vo_c3_Locus_19272_Transcript_2_5_Confidence_0.667<br>_Length_1078     | 94.6  | 116 |
| EOG09370UID | Duplicated | vo_n3_Locus_4239_Transcript_1_2_Confidence_0.667_<br>Length_790       | 86.6  | 116 |
| EOG09370UO4 | Duplicated | vo_c2_Locus_1995_Transcript_5_8_Confidence_0.283_<br>Length_1191      | 196.7 | 166 |
| EOG09370UO4 | Duplicated | vo_c3_Locus_24967_Transcript_5_7_Confidence_0.278<br>_Length_1263     | 196.4 | 166 |
| EOG09370UO4 | Duplicated | vo_n2_Locus_3_Transcript_21809_24291_Confidence_<br>0.000_Length_1296 | 196.3 | 166 |
| EOG09370UR1 | Complete   | vo_c3_Locus_24633_Transcript_1_1_Confidence_0.000<br>_Length_761      | 94.9  | 136 |
| EOG09370UR3 | Missing    |                                                                       |       |     |
| EOG09370USH | Complete   | tri_c_comp25256_c0_seq1                                               | 139.3 | 141 |

|             |            |                                                                   |       |     |
|-------------|------------|-------------------------------------------------------------------|-------|-----|
| EOG09370USJ | Fragmented | vo_c2_Locus_20278_Transcript_2_2_Confidence_0.000<br>_Length_1134 | 160.3 | 101 |
| EOG09370UV4 | Fragmented | vo_n1_Locus_24077_Transcript_2_2_Confidence_0.000<br>_Length_636  | 104.2 | 145 |
| EOG09370V9R | Complete   | vo_c2_Locus_20718_Transcript_1_5_Confidence_0.333<br>_Length_1663 | 53.3  | 113 |
| EOG09370VFL | Duplicated | vo_c1_Locus_27431_Transcript_1_1_Confidence_0.333<br>_Length_1120 | 128.3 | 241 |
| EOG09370VFL | Duplicated | vo_n1_Locus_13323_Transcript_2_2_Confidence_0.400<br>_Length_1076 | 134.0 | 242 |
| EOG09370VLM | Complete   | vo_c2_Locus_6942_Transcript_1_2_Confidence_1.000_<br>Length_758   | 55.0  | 115 |
| EOG09370VTP | Complete   | vo_c1_Locus_28178_Transcript_1_1_Confidence_0.000<br>_Length_1349 | 285.9 | 353 |
| EOG09370VUX | Missing    |                                                                   |       |     |
| EOG09370W44 | Complete   | vo_n1_Locus_30711_Transcript_1_1_Confidence_0.000<br>_Length_904  | 133.4 | 158 |
| EOG09370W6N | Missing    |                                                                   |       |     |
| EOG09370W86 | Duplicated | vo_n3_Locus_25439_Transcript_2_4_Confidence_0.625<br>_Length_948  | 166.3 | 162 |
| EOG09370W86 | Duplicated | vo_n3_Locus_25439_Transcript_4_4_Confidence_0.125<br>_Length_991  | 168.1 | 150 |
| EOG09370WT1 | Duplicated | vo_c1_Locus_10096_Transcript_1_3_Confidence_0.200<br>_Length_717  | 151.6 | 122 |
| EOG09370WT1 | Duplicated | vo_c2_Locus_8914_Transcript_3_3_Confidence_0.167_<br>Length_1003  | 151.0 | 122 |
| EOG09370WT1 | Duplicated | vo_n2_Locus_5522_Transcript_1_3_Confidence_0.750_<br>Length_958   | 151.0 | 122 |
| EOG09370WWI | Missing    |                                                                   |       |     |
| EOG09370WYG | Duplicated | vo_c3_Locus_2501_Transcript_10_10_Confidence_0.06<br>7_Length_716 | 77.4  | 135 |
| EOG09370WYG | Duplicated | vo_n2_Locus_11647_Transcript_1_1_Confidence_0.000<br>_Length_740  | 76.0  | 133 |
| EOG09370WYG | Duplicated | vo_n3_Locus_501_Transcript_56_67_Confidence_0.061<br>_Length_1078 | 76.2  | 135 |
| EOG09370WZX | Duplicated | vo_c1_Locus_17920_Transcript_4_4_Confidence_0.250<br>_Length_826  | 57.8  | 116 |
| EOG09370WZX | Duplicated | vo_n3_Locus_24308_Transcript_2_3_Confidence_0.667<br>_Length_968  | 57.8  | 116 |
| EOG09370WZX | Duplicated | vo_n3_Locus_24308_Transcript_3_3_Confidence_0.000<br>_Length_1053 | 54.6  | 112 |
| EOG09370X1T | Missing    |                                                                   |       |     |
| EOG09370XFG | Complete   | vo_c1_Locus_17033_Transcript_1_1_Confidence_0.000<br>_Length_781  | 41.4  | 100 |
| EOG09370XFJ | Complete   | vo_c2_Locus_331_Transcript_2_4_Confidence_0.667_<br>Length_1647   | 322.6 | 356 |
| EOG09370XO6 | Duplicated | vo_c2_Locus_4326_Transcript_1_2_Confidence_0.333_<br>Length_603   | 135.5 | 121 |
| EOG09370XO6 | Duplicated | vo_n3_Locus_6524_Transcript_2_3_Confidence_0.400_<br>Length_1865  | 134.2 | 130 |
| EOG09370Y63 | Duplicated | tri_c_comp17048_c0_seq4                                           | 205.3 | 133 |
| EOG09370Y63 | Duplicated | vo_c3_Locus_2228_Transcript_1_8_Confidence_0.792_<br>Length_644   | 203.0 | 132 |

|             |            |                                                                    |       |     |
|-------------|------------|--------------------------------------------------------------------|-------|-----|
| EOG09370Y63 | Duplicated | vo_n1_Locus_3700_Transcript_5_13_Confidence_0.235<br>_Length_627   | 205.5 | 133 |
| EOG09370YC4 | Duplicated | tri_n_comp25535_c0_seq1                                            | 83.5  | 153 |
| EOG09370YC4 | Duplicated | vo_n2_Locus_2906_Transcript_1_1_Confidence_0.000_<br>Length_895    | 83.8  | 153 |
| EOG09370YCN | Complete   | vo_c3_Locus_8549_Transcript_1_1_Confidence_0.000_<br>Length_686    | 86.1  | 115 |
| EOG09370YSI | Missing    |                                                                    |       |     |
| EOG09370ZI7 | Complete   | vo_n1_Locus_1223_Transcript_4_4_Confidence_0.200_<br>Length_4281   | 52.6  | 106 |
| EOG09370ZOK | Missing    |                                                                    |       |     |
| EOG0937106D | Missing    |                                                                    |       |     |
| EOG0937106Y | Duplicated | tri_n_comp40576_c0_seq1                                            | 96.6  | 120 |
| EOG0937106Y | Duplicated | vo_c1_Locus_17884_Transcript_1_4_Confidence_0.571<br>_Length_1084  | 100.4 | 120 |
| EOG09371088 | Complete   | vo_n2_Locus_22654_Transcript_1_1_Confidence_0.000_<br>_Length_691  | 141.8 | 138 |
| EOG093710A7 | Complete   | vo_c1_Locus_800_Transcript_1_1_Confidence_0.000_L<br>ength_1094    | 53.1  | 94  |
| EOG093710JH | Duplicated | tri_n_comp45206_c0_seq1                                            | 30.9  | 85  |
| EOG093710JH | Duplicated | vo_c1_Locus_144_Transcript_15_17_Confidence_0.097<br>_Length_2228  | 30.2  | 69  |
| EOG093710SY | Duplicated | vo_c1_Locus_10992_Transcript_1_1_Confidence_0.000_<br>_Length_882  | 151.2 | 106 |
| EOG093710SY | Duplicated | vo_c2_Locus_14944_Transcript_1_2_Confidence_1.000_<br>_Length_1236 | 148.5 | 122 |
| EOG093710SY | Duplicated | vo_c2_Locus_14944_Transcript_1_2_Confidence_1.000_<br>_Length_1236 | 149.5 | 106 |
| EOG093710SY | Duplicated | vo_n2_Locus_3635_Transcript_1_2_Confidence_1.000_<br>Length_748    | 128.9 | 97  |
| EOG093710T1 | Duplicated | tri_c_comp21721_c0_seq1                                            | 200.6 | 118 |
| EOG093710T1 | Duplicated | vo_c1_Locus_1693_Transcript_6_51_Confidence_0.053<br>_Length_551   | 201.0 | 118 |
| EOG093710T1 | Duplicated | vo_c2_Locus_245_Transcript_7_11_Confidence_0.241_<br>Length_591    | 200.8 | 118 |
| EOG0937112Y | Fragmented | vo_n2_Locus_20951_Transcript_3_5_Confidence_0.000_<br>_Length_595  | 95.3  | 89  |
| EOG093711E9 | Complete   | vo_c1_Locus_8125_Transcript_1_2_Confidence_0.667_<br>Length_569    | 156.0 | 114 |
| EOG093711LC | Duplicated | vo_n2_Locus_5115_Transcript_1_1_Confidence_0.000_<br>Length_1108   | 59.3  | 79  |
| EOG093711LC | Duplicated | vo_n2_Locus_5115_Transcript_1_1_Confidence_0.000_<br>Length_1108   | 59.3  | 79  |
| EOG093711QY | Complete   | vo_n1_Locus_2982_Transcript_4_17_Confidence_0.192<br>_Length_2025  | 85.0  | 97  |
| EOG093711ZO | Duplicated | tri_n_comp29947_c0_seq1                                            | 85.4  | 158 |
| EOG093711ZO | Duplicated | vo_c2_Locus_12685_Transcript_1_1_Confidence_0.000_<br>_Length_980  | 79.9  | 187 |
| EOG0937122Q | Missing    |                                                                    |       |     |
| EOG0937128O | Complete   | vo_n1_Locus_25878_Transcript_2_2_Confidence_0.000_<br>_Length_719  | 81.9  | 86  |
| EOG0937129K | Missing    |                                                                    |       |     |



|             |            |                                                                   |       |     |
|-------------|------------|-------------------------------------------------------------------|-------|-----|
| EOG093712G8 | Missing    |                                                                   |       |     |
| EOG093712Q6 | Missing    |                                                                   |       |     |
| EOG09371330 | Missing    |                                                                   |       |     |
| EOG0937133J | Duplicated | vo_c2_Locus_4120_Transcript_11_21_Confidence_0.24<br>4_Length_613 | 182.0 | 111 |
| EOG0937133J | Duplicated | vo_n1_Locus_1030_Transcript_11_27_Confidence_0.34<br>5_Length_567 | 182.6 | 111 |
| EOG0937133J | Duplicated | vo_n3_Locus_5371_Transcript_5_16_Confidence_0.281<br>_Length_590  | 182.2 | 111 |
| EOG093713HJ | Missing    |                                                                   |       |     |
| EOG093713LY | Duplicated | vo_c3_Locus_3728_Transcript_4_10_Confidence_0.103<br>_Length_989  | 118.2 | 90  |
| EOG093713LY | Duplicated | vo_c3_Locus_3728_Transcript_5_10_Confidence_0.000<br>_Length_633  | 119.4 | 90  |
| EOG093713LY | Duplicated | vo_n2_Locus_6571_Transcript_8_8_Confidence_0.038_<br>Length_515   | 120.0 | 90  |
| EOG09371431 | Duplicated | vo_c1_Locus_4662_Transcript_17_20_Confidence_0.18<br>2_Length_666 | 166.0 | 97  |
| EOG09371431 | Duplicated | vo_c2_Locus_3455_Transcript_1_4_Confidence_0.833_<br>Length_457   | 167.2 | 97  |
| EOG093714JU | Missing    |                                                                   |       |     |
| EOG093714Q2 | Complete   | vo_c1_Locus_21978_Transcript_1_2_Confidence_0.333<br>_Length_2296 | 67.0  | 69  |
| EOG093715EC | Complete   | tri_n_comp8120_c0_seq1                                            | 53.7  | 79  |
| EOG09371675 | Complete   | tri_n_comp21879_c0_seq1                                           | 108.2 | 118 |
| EOG0937167R | Complete   | vo_c1_Locus_6297_Transcript_2_2_Confidence_0.500_<br>Length_985   | 47.0  | 95  |
| EOG093716T7 | Duplicated | vo_c1_Locus_7043_Transcript_1_2_Confidence_0.750_<br>Length_2755  | 140.4 | 226 |
| EOG093716T7 | Duplicated | vo_c1_Locus_7043_Transcript_2_2_Confidence_0.000_<br>Length_2853  | 140.4 | 226 |
| EOG093717LU | Missing    |                                                                   |       |     |
| EOG0937183G | Complete   | vo_n1_Locus_17289_Transcript_2_2_Confidence_0.000<br>_Length_445  | 73.6  | 67  |
| EOG0937186Q | Missing    |                                                                   |       |     |
| EOG093718E9 | Missing    |                                                                   |       |     |
| EOG093718EG | Complete   | tri_c_comp13746_c0_seq2                                           | 71.1  | 58  |
| EOG0937192A | Complete   | vo_c3_Locus_32806_Transcript_1_1_Confidence_0.000<br>_Length_1003 | 79.8  | 130 |
| EOG093719IK | Duplicated | vo_c3_Locus_8674_Transcript_5_9_Confidence_0.182_<br>Length_1753  | 98.3  | 102 |
| EOG093719IK | Duplicated | vo_n2_Locus_5831_Transcript_1_1_Confidence_0.000_<br>Length_575   | 101.9 | 103 |
| EOG093719M8 | Duplicated | tri_c_comp27616_c0_seq1                                           | 37.8  | 63  |
| EOG093719M8 | Duplicated | vo_n2_Locus_29712_Transcript_1_1_Confidence_0.000<br>_Length_670  | 39.1  | 64  |
| EOG09371BIR | Missing    |                                                                   |       |     |

**Supplementary Table S9. DEG id, log2Fold Change, adjusted P value (padj), Sequence description and enzyme codes**

| id                                                             | log2 fold change | padj       | Seq. Description                                                                                                                                                                                                                                                                                                                                                                                   | Enzyme Codes                                |
|----------------------------------------------------------------|------------------|------------|----------------------------------------------------------------------------------------------------------------------------------------------------------------------------------------------------------------------------------------------------------------------------------------------------------------------------------------------------------------------------------------------------|---------------------------------------------|
| vo_n2_Locus_5179_Transcript_5/19_Confidence_0.522_Length_3870  | 6,73798017       | 9,90E-13   | tl15a_arath ame: full=thylakoid lumenal 15 kda protein chloroplastic ame: full=p15 flags: precursor                                                                                                                                                                                                                                                                                                | -                                           |
| vo_c1_Locus_7371_Transcript_1/4_Confidence_0.500_Length_1352   | 6,49714632       | 7,24E-26   | mdhm_fraan ame: full=malate mitochondrial flags: precursor                                                                                                                                                                                                                                                                                                                                         | EC:1.1.1.37;<br>EC:1.1.1.82                 |
| vo_c1_Locus_31255_Transcript_2/4_Confidence_0.444_Length_1598  | 6,47008907       | 0,00478469 | oml6_orys ame: full=protein mei2-like 6 short=oml6 ame: full=mei2-like protein 6                                                                                                                                                                                                                                                                                                                   |                                             |
| vo_n2_Locus_636_Transcript_3/16_Confidence_0.306_Length_685    | 6,46253683       | 2,14E-11   | dhb4_human ame: full=peroxisomal multifunctional enzyme type 2 short=mfe-2 ame: full=17-beta-hydroxysteroid dehydrogenase 4 short=17-beta-hsd 4 ame: full=d-bifunctional protein short=dbp ame: full=multifunctional protein 2 short=mpf-2 contains: ame: full=hydroxyacyl- dehydrogenase contains: ame: full=enoyl- hydratase 2 ame: full=3- -alpha-trihydroxy-5-beta-cholest-24-enoyl- hydratase | EC:1.1.1.35;<br>EC:1.1.1.51;<br>EC:4.2.1.74 |
| vo_c1_Locus_1287_Transcript_24/49_Confidence_0.341_Length_2746 | 6,22766076       | 1,22E-09   | y326_metja ame: full= permease mj0326                                                                                                                                                                                                                                                                                                                                                              | -                                           |
| vo_n1_Locus_10677_Transcript_1/2_Confidence_0.333_Length_6802  | 6,22350109       | 2,05E-09   | dpol_hbvc4 ame: full=protein p includes: ame: full=dna-directed dna polymerase includes: ame: full=rna-directed dna polymerase includes: ame: full=ribonuclease h                                                                                                                                                                                                                                  |                                             |
| vo_c3_Locus_3418_Transcript_17/28_Confidence_0.286_Length_802  | 6,16444896       | 7,73E-09   | ---NA---                                                                                                                                                                                                                                                                                                                                                                                           |                                             |
| tri_n_comp33784_c0_seq1                                        | 6,03562084       | 9,94E-10   | ---NA---                                                                                                                                                                                                                                                                                                                                                                                           |                                             |
| vo_c2_Locus_3191_Transcript_18/23_Confidence_0.300_Length_775  | 5,94168976       | 9,36E-08   | dptor_mouse ame: full=dep domain-containing mtor-interacting protein ame: full=dep domain-containing protein 6                                                                                                                                                                                                                                                                                     |                                             |
| vo_n3_Locus_16240_Transcript_2/3_Confidence_0.400_Length_3532  | 5,80187888       | 6,09E-07   | star_drome ame: full=protein star                                                                                                                                                                                                                                                                                                                                                                  | -                                           |

|                                                                |            |          |                                                                                                                                                                                                                                                                                                                                                               |            |
|----------------------------------------------------------------|------------|----------|---------------------------------------------------------------------------------------------------------------------------------------------------------------------------------------------------------------------------------------------------------------------------------------------------------------------------------------------------------------|------------|
| vo_n1_Locus_33218_Transcript_1/1_Confidence_0.000_Length_1206  | 5,72059668 | 8,87E-07 | p4ha2_caeel ame: full=prolyl 4-hydroxylase subunit alpha-2 short=4-ph<br>alpha-2 ame: full=procollagen-oxoglutarate-4-dioxygenase subunit alpha-<br>2 flags: precursor                                                                                                                                                                                        | EC:1.14.11 |
| tri_c_comp21232_c1_seq44                                       | 5,66290247 | 2,47E-06 | jmjd6_hydat ame: full=bifunctional arginine demethylase and lysyl-<br>hydroxylase psr ame: full=phosphatidylserine receptor                                                                                                                                                                                                                                   | -          |
| vo_c2_Locus_19599_Transcript_2/5_Confidence_0.455_Length_2709  | 5,65334974 | 1,64E-06 | galt1_mouse ame: full=polypeptide n-acetylgalactosaminyltransferase 1<br>ame: full=polypeptide c transferase 1 short= c-t1 short=pp- ase 1 ame:<br>full=protein-udp acetylgalactosaminyltransferase 1 ame: full=udp-<br>c:polypeptide n-acetylgalactosaminyltransferase 1 contains: ame:<br>full=polypeptide n-acetylgalactosaminyltransferase 1 soluble form | -          |
| vo_n2_Locus_15818_Transcript_1/10_Confidence_0.429_Length_2380 | 5,63220175 | 1,35E-06 | polc2_junox ame: full=polcalcin jun o 2 ame: full=calcium-binding pollen<br>allergen jun o 2 ame: allergen=jun o 2                                                                                                                                                                                                                                            | -          |
| vo_n2_Locus_5145_Transcript_8/9_Confidence_0.294_Length_1998   | 5,60392769 | 1,41E-06 | deda_borbu ame: full=inner membrane protein bb_0250                                                                                                                                                                                                                                                                                                           | -          |
| vo_n3_Locus_21257_Transcript_2/4_Confidence_0.375_Length_1948  | 5,52407512 | 8,80E-06 | f90a2_human ame: full= protein fam90a2p                                                                                                                                                                                                                                                                                                                       | -          |
| vo_n1_Locus_5727_Transcript_43/46_Confidence_0.134_Length_9569 | 5,46336031 | 1,43E-05 | dhx57_human ame: full= atp-dependent rna helicase dhx57 ame: full=deah<br>box protein 57                                                                                                                                                                                                                                                                      | -          |
| vo_c2_Locus_10763_Transcript_5/20_Confidence_0.388_Length_2919 | 5,44168069 | 2,93E-06 | huth_rhosk ame: full=histidine ammonia-lyase short=histidase                                                                                                                                                                                                                                                                                                  | -          |
| vo_c1_Locus_8663_Transcript_1/7_Confidence_0.300_Length_2289   | 5,31726267 | 1,88E-05 | ---NA---                                                                                                                                                                                                                                                                                                                                                      | -          |
| vo_n3_Locus_18699_Transcript_1/2_Confidence_0.500_Length_1893  | 5,31620674 | 1,88E-05 | unc89_caeel ame: full=muscle m-line assembly protein unc-89 ame:<br>full=uncoordinated protein 89                                                                                                                                                                                                                                                             | -          |
| vo_n1_Locus_25409_Transcript_1/1_Confidence_0.000_Length_1010  | 5,29910355 | 1,76E-05 | ---NA---                                                                                                                                                                                                                                                                                                                                                      | -          |
| vo_n3_Locus_724_Transcript_2/7_Confidence_0.500_Length_2248    | 5,25325823 | 8,44E-05 | lpxa_sulnb ame: full=acyl-                                                                                                                                                                                                                                                                                                                                    | -          |

|                                                              |            |             |                                                                                                                                                                                                                                                                                                                                                                                                                                                                                                                                                                                                                                                                                                                                                                                                |           |
|--------------------------------------------------------------|------------|-------------|------------------------------------------------------------------------------------------------------------------------------------------------------------------------------------------------------------------------------------------------------------------------------------------------------------------------------------------------------------------------------------------------------------------------------------------------------------------------------------------------------------------------------------------------------------------------------------------------------------------------------------------------------------------------------------------------------------------------------------------------------------------------------------------------|-----------|
| vo_n1_Locus_43261_Transcript_1/1_Confidence_0.000_Length_260 | 5,17941234 | 8,75E-05    | polg_hcvjl ame: full=genome polyprotein contains: ame: full=core protein p21 ame: full=capsid protein c ame: full=p21 contains: ame: full=core protein p19 contains: ame: full=envelope glycoprotein e1 ame: full=gp32 ame: full=gp35 contains: ame: full=envelope glycoprotein e2 ame: full=ns1 ame: full=gp68 ame: full=gp70 contains: ame: full=p7 contains: ame: full=protease ns2-3 short=p23 contains: ame: full=serine protease ns3 ame: full=hepacivirin ame: full=ns3p ame: full=p70 contains: ame: full=non-structural protein 4a short=ns4a ame: full=p8 contains: ame: full=non-structural protein 4b short=ns4b ame: full=p27 contains: ame: full=non-structural protein 5a short=ns5a ame: full=p56 contains: ame: full=rna-directed rna polymerase ame: full=ns5b ame: full=p68 |           |
| vo_n2_Locus_7614_Transcript_1/1_Confidence_0.000_Length_1532 | 5,16685186 | 6,43E-05    | lac4_arath ame: full=laccase-4 ame: full=benzenediol:oxygen oxidoreductase 4 ame: full=diphenol oxidase 4 ame: full=protein irregular xylem 12 ame: full=urishiol oxidase 4 flags: precursor                                                                                                                                                                                                                                                                                                                                                                                                                                                                                                                                                                                                   |           |
| tri_n_comp20382_c0_seq1                                      | 5,16139525 | 0,000171901 | cyb_plach ame: full=cytochrome b ame: full=complex iii subunit 3 ame: full=complex iii subunit iii ame: full=cytochrome b-c1 complex subunit 3 ame: full=ubiquinol-cytochrome-c reductase complex cytochrome b subunit                                                                                                                                                                                                                                                                                                                                                                                                                                                                                                                                                                         | -         |
| vo_c2_Locus_3577_Transcript_1/5_Confidence_0.091_Length_1993 | 5,11790638 | 0,000233272 | pepa_calja ame: full=pepsin a flags: precursor                                                                                                                                                                                                                                                                                                                                                                                                                                                                                                                                                                                                                                                                                                                                                 | EC:3.4.23 |
| tri_n_comp20072_c0_seq9                                      | 5,11191746 | 3,33E-05    | rcd1_macfa ame: full=cell differentiation protein rcd1 homolog short=rcd-1 ame: full=ccr4-not transcription complex subunit 9gi                                                                                                                                                                                                                                                                                                                                                                                                                                                                                                                                                                                                                                                                | -         |
| vo_c3_Locus_24067_Transcript_1/2_Confidence_0.667_Length_217 | 5,09015053 | 6,85E-05    | ---NA---                                                                                                                                                                                                                                                                                                                                                                                                                                                                                                                                                                                                                                                                                                                                                                                       |           |
| tri_n_comp50355_c0_seq1                                      | 5,03654577 | 7,23E-05    | sec24_picpa ame: full=protein transport protein sec24                                                                                                                                                                                                                                                                                                                                                                                                                                                                                                                                                                                                                                                                                                                                          |           |
| vo_n3_Locus_22_Transcript_23/31_Confidence_0.030_Length_1941 | 5,02791281 | 0,00030066  | ---NA---                                                                                                                                                                                                                                                                                                                                                                                                                                                                                                                                                                                                                                                                                                                                                                                       |           |
| vo_n2_Locus_34437_Transcript_1/1_Confidence_0.000_Length_791 | 4,95984028 | 0,000420263 | gcs2_chlad ame: full= glutamate--cysteine ligase 2 ame: full=gamma-glutamylcysteine synthetase 2 short=gcs 2 short=gamma-gcs 2                                                                                                                                                                                                                                                                                                                                                                                                                                                                                                                                                                                                                                                                 |           |

|                                                                |            |             |                                                                                                                                                                                                                                                                                       |             |
|----------------------------------------------------------------|------------|-------------|---------------------------------------------------------------------------------------------------------------------------------------------------------------------------------------------------------------------------------------------------------------------------------------|-------------|
| vo_n3_Locus_31555_Transcript_2/3_Confidence_0.333_Length_2001  | 4,9429584  | 0,000737771 | mco_stahj ame: full=multicopper oxidase mco                                                                                                                                                                                                                                           | -           |
| vo_n2_Locus_9140_Transcript_22/26_Confidence_0.233_Length_3641 | 4,93440842 | 0,000171901 | you1_caeel ame: full= transporter                                                                                                                                                                                                                                                     | -           |
| vo_n1_Locus_1282_Transcript_9/28_Confidence_0.233_Length_1398  | 4,89968537 | 0,000434799 | g3st1_human ame: full=galactosylceramide sulfotransferase short= er<br>sulfotransferase ame: full=3 -phosphoadenosine-5 -phosphosulfate: er<br>sulfotransferase ame: full=3 -phosphoadenylylsulfate:galactosylceramide 3 -<br>sulfotransferase ame: full=cerebroside sulfotransferase |             |
| tri_n_comp73516_c0_seq1                                        | 4,88781499 | 0,000592196 | ---NA---                                                                                                                                                                                                                                                                              |             |
| vo_n2_Locus_3134_Transcript_3/6_Confidence_0.615_Length_2515   | 4,86400047 | 0,000477135 | ---NA---                                                                                                                                                                                                                                                                              |             |
| vo_n1_Locus_7615_Transcript_12/21_Confidence_0.494_Length_2036 | 4,85959438 | 0,00125422  | vnsc_aedev ame: full=non-capsid protein ns-1 ame: full=ncvp1 ame:<br>full=non-structural protein ns1                                                                                                                                                                                  |             |
| vo_c3_Locus_2065_Transcript_17/73_Confidence_0.277_Length_1776 | 4,84803676 | 0,001379322 | kv3a3_mouse ame: full=ig kappa chain v-iii region mopc 70                                                                                                                                                                                                                             |             |
| vo_c1_Locus_12555_Transcript_1/7_Confidence_0.455_Length_294   | 4,83714528 | 0,000502091 | pkho1_danre ame: full=pleckstrin homology domain-containing family o<br>member 1-a short=ph domain-containing family o member 1-a ame:<br>full=casein kinase 2-interacting protein 1 short=ck2-interacting protein 1<br>short=ckip-1                                                  |             |
| vo_c2_Locus_5926_Transcript_10/12_Confidence_0.333_Length_2827 | 4,75591326 | 0,001346055 | gpma_thetn ame: full= -bisphosphoglycerate-dependent phosphoglycerate<br>mutase short=bpg-dependent pgam short=pgam<br>short=phosphoglyceromutase short=dpgm                                                                                                                          | -           |
| tri_n_comp7767_c0_seq2                                         | 4,74907704 | 0,000680253 | nrps7_aspfu ame: full=nonribosomal peptide synthetase 7                                                                                                                                                                                                                               | -           |
| tri_n_comp20382_c0_seq94                                       | 4,71818322 | 0,001166407 | gt251_bovin ame: full=procollagen galactosyltransferase 1 ame:<br>full=collagen beta(1-o)galactosyltransferase 1 ame: full=glycosyltransferase<br>25 family member 1 ame: full=hydroxylysine galactosyltransferase 1 flags:<br>precursor                                              |             |
| vo_n3_Locus_36529_Transcript_2/3_Confidence_0.333_Length_2968  | 4,70131398 | 0,003453619 | ppsa_mycto ame: full=phthiocerol synthesis polyketide synthase type i<br>ame: full=beta-ketoacyl-acyl-carrier-protein synthase i                                                                                                                                                      | -           |
| vo_c1_Locus_1107_Transcript_1/4_Confidence_0.143_Length_1311   | 4,68357786 | 0,003778206 | apx7_orysj ame: full=probable l-ascorbate peroxidase chloroplastic ame:<br>full= x07 flags: precursor                                                                                                                                                                                 | EC:1.11.1.7 |

|                                                                 |            |             |                                                                                                                                                                                                                                                                                                    |           |
|-----------------------------------------------------------------|------------|-------------|----------------------------------------------------------------------------------------------------------------------------------------------------------------------------------------------------------------------------------------------------------------------------------------------------|-----------|
| tri_c_comp21232_c1_seq89                                        | 4,67902213 | 0,003585906 | jmjd6_hydat ame: full=bifunctional arginine demethylase and lysyl-hydroxylase psr ame: full=phosphatidylserine receptor                                                                                                                                                                            | -         |
| vo_n1_Locus_16253_Transcript_1/1_Confidence_0.000_Length_673    | 4,64947086 | 0,000787869 | chm4c_human ame: full=charged multivesicular body protein 4c ame: full=chromatin-modifying protein 4c short=chmp4c ame: full=snf7 homolog associated with alix 3 ame: full=snf7-3 short=hsnf7-3 ame: full=vacuolar protein sorting-associated protein 32-3 short=vps32-3 short=hvps32-3            |           |
| vo_n1_Locus_25036_Transcript_1/1_Confidence_0.000_Length_1116   | 4,63192454 | 0,002772061 | mtip_metka ame: full=probable s-methyl-5 -thioinosine phosphorylase ame: full=5 -methylthioinosine phosphorylase short=mti phosphorylase short=mtip                                                                                                                                                | -         |
| vo_c1_Locus_2394_Transcript_16/42_Confidence_0.323_Length_1978  | 4,61343379 | 0,005165988 | amt12_arath ame: full=ammonium transporter 1 member 2 short= 1 2                                                                                                                                                                                                                                   | -         |
| vo_c2_Locus_8806_Transcript_6/17_Confidence_0.306_Length_875    | 4,61343379 | 0,005165988 | ---NA---                                                                                                                                                                                                                                                                                           |           |
| tri_n_comp14749_c0_seq1                                         | 4,58418222 | 0,002252194 | tc159_arath ame: full=translocase of chloroplast chloroplastic short= oc159 ame: full=159 kda chloroplast outer envelope protein ame: full=plastid protein import 2 ame: full=translocase of chloroplast chloroplastic short= oc160 ame: full=translocase of chloroplast chloroplastic short= oc86 |           |
| tri_n_comp19741_c0_seq16                                        | 4,54491663 | 0,003403828 | ---NA---                                                                                                                                                                                                                                                                                           |           |
| vo_n1_Locus_6568_Transcript_1/1_Confidence_0.667_Length_239     | 4,53783714 | 0,003453619 | dapd_rhort ame: full= -tetrahydropyridine- -dicarboxylate n-succinyltransferase ame: full=tetrahydrodipicolinate n-succinyltransferase short=thdp succinyltransferase short=thp succinyltransferase short=tetrahydrodipicolinate succinylase                                                       |           |
| vo_c1_Locus_31_Transcript_162/1155_Confidence_0.005_Length_446  | 4,53634688 | 0,004543773 | vglm_tswv ame: full=envelope glycoprotein short=gp ame: full=m polyprotein contains: ame: full=glycoprotein g1 contains: ame: full=glycoprotein g2 flags: precursor                                                                                                                                |           |
| vo_c3_Locus_1097_Transcript_26/47_Confidence_0.267_Length_2975  | 4,53547651 | 0,003046928 | pof9_schpo ame: full=f-box protein pof9                                                                                                                                                                                                                                                            |           |
| vo_n1_Locus_12248_Transcript_11/19_Confidence_0.462_Length_6817 | 4,49626944 | 0,00553337  | ans1b_danre ame: full=ankyrin repeat and sterile alpha motif domain-containing protein 1b                                                                                                                                                                                                          | EC:3.4.22 |
| vo_n3_Locus_31357_Transcript_7/9_Confidence_0.538_Length_1281   | 4,4775918  | 0,004756059 | huti_flaj1 ame: full=imidazolonepropionase ame: full=imidazolone-5-propionate hydrolase                                                                                                                                                                                                            |           |
| tri_c_comp20467_c0_seq3                                         | 4,38884661 | 0,015870763 | ---NA---                                                                                                                                                                                                                                                                                           |           |

|                                                                   |            |             |                                                                                                                                                                                                                                                                                                              |   |
|-------------------------------------------------------------------|------------|-------------|--------------------------------------------------------------------------------------------------------------------------------------------------------------------------------------------------------------------------------------------------------------------------------------------------------------|---|
| tri_c_comp21232_c1_seq99                                          | 4,37324182 | 0,009895515 | jmjd6_hydat ame: full=bifunctional arginine demethylase and lysyl-hydroxylase psr ame: full=phosphatidylserine receptor                                                                                                                                                                                      | - |
| vo_n1_Locus_4757_Transcript_1/2_Confidence_0.750_Length_684       | 4,35181787 | 0,016134458 | oaf1_yeast ame: full=oleate-activated transcription factor 1                                                                                                                                                                                                                                                 |   |
| vo_c1_Locus_7414_Transcript_11/26_Confidence_0.551_Length_5434    | 4,31268593 | 0,02515293  | svcp1_human ame: full= von willebrand factor type egf and pentraxin domain-containing protein 1 ame: full=ccp module-containing protein 22 ame: full=polydom ame: full=selectin-like osteoblast-derived protein short=scl-ob ame: full=serologically defined breast cancer antigen ny-br-38 flags: precursor | - |
| vo_c1_Locus_8135_Transcript_68/78_Confidence_0.238_Length_6119    | 4,27075484 | 0,030686812 | grm4_human ame: full=metabotropic glutamate receptor 4 short=m 4 flags: precursor                                                                                                                                                                                                                            | - |
| vo_n2_Locus_3666_Transcript_11/13_Confidence_0.343_Length_3404    | 4,26632661 | 0,016405138 | clpc_guith ame: full=atp-dependent clp protease atp-binding subunit clpa homolog                                                                                                                                                                                                                             | - |
| vo_n3_Locus_24788_Transcript_1/1_Confidence_0.000_Length_902      | 4,2554962  | 0,018233577 | gatc_opitp ame: full=aspartyl glutamyl-trna(asn gln) amidotransferase subunit c short=asp glu-adt subunit c                                                                                                                                                                                                  |   |
| vo_c2_Locus_9395_Transcript_1/2_Confidence_0.920_Length_1509      | 4,25341292 | 0,018233577 | rng1l_arath ame: full=e3 ubiquitin-protein ligase ring1-like ame: full=ring finger protein 1                                                                                                                                                                                                                 | - |
| vo_n2_Locus_206_Transcript_94/103_Confidence_0.005_Length_4232    | 4,25046648 | 0,018233577 | cubn_mouse ame: full=cubilin ame: full=intrinsic factor-cobalamin receptor flags: precursor                                                                                                                                                                                                                  |   |
| tri_n_comp19462_c0_seq11                                          | 4,23999512 | 0,022012691 | kdm6a_human ame: full=lysine-specific demethylase 6a ame: full=histone demethylase utx ame: full=ubiquitously-transcribed tpr protein on the x chromosome ame: full=ubiquitously-transcribed x chromosome tetratricopeptide repeat protein                                                                   |   |
| vo_n2_Locus_3_Transcript_20543/24291_Confidence_0.000_Length_3890 | 4,22284199 | 0,031240268 | hs7c1_dicdi ame: full=heat shock cognate 70 kda protein 1 short=hsc70-1                                                                                                                                                                                                                                      | - |
| vo_c3_Locus_10183_Transcript_2/22_Confidence_0.500_Length_2470    | 4,21547909 | 0,034315221 | r1b17_solde ame: full= late blight resistance protein homolog r1b-17                                                                                                                                                                                                                                         |   |
| vo_n1_Locus_7190_Transcript_5/7_Confidence_0.667_Length_3010      | 4,20450332 | 0,022327152 | kcnae_drome ame: full=potassium voltage-gated channel protein eag ame: full=ether-a-go-go protein                                                                                                                                                                                                            | - |

|                                                                 |            |             |                                                                                                                                                                                       |                                                                              |
|-----------------------------------------------------------------|------------|-------------|---------------------------------------------------------------------------------------------------------------------------------------------------------------------------------------|------------------------------------------------------------------------------|
| vo_n1_Locus_7034_Transcript_4/6_Confidence_0.692_Length_1788    | 4,20369243 | 0,023444485 | kpcd2_rat ame: full=serine threonine-protein kinase d2 ame: full=npkc-d2                                                                                                              |                                                                              |
| vo_n2_Locus_1445_Transcript_12/24_Confidence_0.250_Length_1016  | 4,19402335 | 0,016856025 | pnta_ecoli ame: full=nad transhydrogenase subunit alpha ame: full=nicotinamide nucleotide transhydrogenase subunit alpha ame: full=pyridine nucleotide transhydrogenase subunit alpha |                                                                              |
| tri_c_comp19578_c0_seq4                                         | 4,13532323 | 0,014067346 | ---NA---                                                                                                                                                                              |                                                                              |
| vo_n1_Locus_17075_Transcript_2/4_Confidence_0.400_Length_811    | 4,09414661 | 0,038417345 | ab23g_arath ame: full=abc transporter g family member 23 short=abc transporter short= 23 ame: full=probable white-brown complex homolog protein 24 short= 24                          | EC:3.6.1.15                                                                  |
| vo_n2_Locus_19192_Transcript_2/2_Confidence_0.250_Length_3053   | 4,08609721 | 0,040683605 | manea_rat ame: full=glycoprotein endo-alpha- -mannosidase short=endo-alpha mannosidase short=endomannosidase short=rendo ame: full=endo-alpha-d-mannosidase short=enman               | EC:2.3.1.22;<br>EC:3.2.1.24;<br>EC:2.4.1.101;<br>EC:2.4.1.94;<br>EC:2.3.1.20 |
| tri_n_comp16805_c0_seq2                                         | 4,08247364 | 0,039106281 | ung_vzvo ame: full=uracil-dna glycosylase short=udg ame: full=ung                                                                                                                     |                                                                              |
| vo_c2_Locus_10226_Transcript_61/67_Confidence_0.410_Length_3306 | 4,07449335 | 0,034315221 | pmp19_chlpn ame: full=probable outer membrane protein pmp19 ame: full=polymorphic membrane protein 19 flags: precursor                                                                |                                                                              |
| tri_n_comp16502_c0_seq1                                         | 4,07195068 | 0,040614214 | prta_dicch ame: full=serralysin a ame: full=secreted protease a short= flags: precursor                                                                                               |                                                                              |
| tri_n_comp54988_c0_seq1                                         | 4,04696204 | 0,040614214 | rr3_chavu ame: full=30s ribosomal protein chloroplatic                                                                                                                                |                                                                              |
| vo_c2_Locus_19266_Transcript_5/9_Confidence_0.632_Length_1844   | 4,04696204 | 0,040614214 | cac1d_human ame: full=voltage-dependent l-type calcium channel subunit alpha-1d ame: full=calcium l alpha-1 isoform 2 ame: full=voltage-gated calcium channel subunit alpha           |                                                                              |
| vo_c1_Locus_4958_Transcript_8/15_Confidence_0.615_Length_2367   | 4,04442198 | 0,0447359   | dnjh_cucsa ame: full= protein homolog ame: full=dnaj-1 flags: precursor                                                                                                               |                                                                              |
| vo_n1_Locus_19358_Transcript_1/2_Confidence_0.333_Length_3813   | 4,01894767 | 0,0447359   | gso2_arath ame: full=irr receptor-like serine threonine-protein kinase gso2 ame: full=protein embryo sac development arrest 23 ame: full=protein gassho 2 flags: precursor            | -                                                                            |
| vo_c3_Locus_6066_Transcript_21/22_Confidence_0.202_Length_2076  | 3,9964015  | 0,0447359   | ---NA---                                                                                                                                                                              |                                                                              |
| vo_n2_Locus_492_Transcript_3/4_Confidence_0.429_Length_2376     | 3,98825969 | 0,028427964 | ---NA---                                                                                                                                                                              |                                                                              |



|                                                                |            |             |                                                                                                                                                                                       |   |
|----------------------------------------------------------------|------------|-------------|---------------------------------------------------------------------------------------------------------------------------------------------------------------------------------------|---|
| vo_n2_Locus_4317_Transcript_3/3_Confidence_0.200_Length_590    | 3,98523429 | 0,024565634 | ---NA---                                                                                                                                                                              |   |
| vo_c3_Locus_438_Transcript_13/50_Confidence_0.139_Length_756   | 3,96301415 | 0,023444485 | ---NA---                                                                                                                                                                              | - |
| tri_n_comp72938_c0_seq1                                        | 3,95104806 | 0,044567259 | murc_rhiec ame: full=udp-n-acetylmuramate--l-alanine ligase ame: full=udp-n-acetylmuramoyl-l-alanine synthetase                                                                       |   |
| tri_n_comp46573_c0_seq1                                        | 3,93687959 | 0,029892879 | kn12b_arath ame: full=kinesin-like protein kin12b ame: full=phragmoplast-associated kinesin-related protein 1-like protein short= 1l                                                  |   |
| vo_n2_Locus_3470_Transcript_2/6_Confidence_0.727_Length_879    | 3,88639277 | 0,044468428 | mob1a_mouse ame: full=mob kinase activator 1a ame: full=mob1 homolog 1b ame: full=mps one binder kinase activator-like 1b                                                             | - |
| tri_c_comp20671_c0_seq32                                       | 3,87152266 | 0,040073493 | lorf2_human ame: full=line-1 retrotransposable element orf2 protein short=orf2p includes: ame: full=reverse transcriptase includes: ame: full=endonuclease                            |   |
| vo_n1_Locus_39093_Transcript_3/5_Confidence_0.300_Length_1114  | 3,85835501 | 0,040073493 | met13_mouse ame: full=methyltransferase-like protein 13                                                                                                                               | - |
| vo_n2_Locus_20353_Transcript_1/1_Confidence_0.000_Length_259   | 3,78577984 | 0,044970833 | btbba_danre ame: full=ankyrin repeat and btb poz domain-containing protein btbd11-a ame: full=btb poz domain-containing protein 11-a                                                  |   |
| tri_c_comp20609_c0_seq8                                        | 3,56290867 | 0,0267341   | thii_methh ame: full=probable trna sulfurtransferase ame: full=sulfur carrier protein sulfurtransferase ame: full=thiamine biosynthesis protein ame: full=trna 4-thiouridine synthase |   |
| vo_n1_Locus_1043_Transcript_4/19_Confidence_0.581_Length_1867  | 2,23226077 | 0,028563022 | epn2_arath ame: full=clathrin interactor epsin 2 ame: full=epsin-related 2                                                                                                            |   |
| vo_c2_Locus_189_Transcript_40/60_Confidence_0.152_Length_1470  | 1,84683527 | 0,024565634 | clip3_ponab ame: full=cap-gly domain-containing linker protein 3 ame: full=cytoplasmic linker protein 170-related 59 kda protein short=clip-170-related 59 kda protein short=clipr-59 | - |
| vo_n1_Locus_9015_Transcript_1/5_Confidence_0.667_Length_2154   | 1,82966715 | 0,040592726 | tempt_aplca ame: full=temptin flags: precursor                                                                                                                                        |   |
| vo_n3_Locus_427_Transcript_37/175_Confidence_0.071_Length_2114 | 0,95705745 | 0,003736617 | nrt25_arath ame: full=high affinity nitrate transporter short= 2:5                                                                                                                    | - |

|                                                                 |            |             |                                                                                                                                                                                                                                                                                                                                |                           |
|-----------------------------------------------------------------|------------|-------------|--------------------------------------------------------------------------------------------------------------------------------------------------------------------------------------------------------------------------------------------------------------------------------------------------------------------------------|---------------------------|
| vo_n3_Locus_138_Transcript_26/29_Confidence_0.190_Length_1802   | 0,76750219 | 0,000967552 | fcp_isoga ame: full=fucoxanthin-chlorophyll a-c binding chloroplastic short=fcp flags: precursor                                                                                                                                                                                                                               | -                         |
| vo_n1_Locus_16_Transcript_169/225_Confidence_0.061_Length_1117  | 0,70880589 | 8,93E-05    | hsp90_eimte ame: full=heat shock protein 90                                                                                                                                                                                                                                                                                    | -                         |
| vo_c2_Locus_446_Transcript_3/9_Confidence_0.353_Length_489      | 0,66605701 | 0,01863807  | gata4_chick ame: full=transcription factor gata-4 ame: full=gata-binding factor partial                                                                                                                                                                                                                                        |                           |
| vo_c1_Locus_31_Transcript_932/1155_Confidence_0.008_Length_1081 | 0,62868879 | 0,041264197 | trub2_rat ame: full=probable trna pseudouridine synthase 2                                                                                                                                                                                                                                                                     |                           |
| vo_n2_Locus_561_Transcript_15/51_Confidence_0.279_Length_2571   | 0,60774172 | 0,000434799 | nrt25_arath ame: full=high affinity nitrate transporter short= 2:5                                                                                                                                                                                                                                                             | -                         |
| tri_n_comp46903_c0_seq1                                         | 0,60614156 | 0,036082433 | fmt_kosot ame: full=methionyl-trna formyltransferase                                                                                                                                                                                                                                                                           |                           |
| vo_c3_Locus_25322_Transcript_1/1_Confidence_0.000_Length_1606   | 0,5924054  | 0,034315221 | ltv1_xenla ame: full=protein ltv1 homolog                                                                                                                                                                                                                                                                                      |                           |
| tri_n_comp24956_c0_seq1                                         | 0,58955164 | 3,33E-05    | nia1_orysj ame: full=nitrate reductase                                                                                                                                                                                                                                                                                         | EC:1.7.1.1                |
| vo_n2_Locus_128_Transcript_8/33_Confidence_0.085_Length_4154    | 0,51890657 | 0,000592196 | nirb_kleox ame: full=nitrite reductase                                                                                                                                                                                                                                                                                         | EC:1.7.1.4                |
| vo_c1_Locus_5705_Transcript_16/19_Confidence_0.489_Length_4193  | -0,5239369 | 0,037710321 | idh_azovi ame: full=isocitrate dehydrogenase                                                                                                                                                                                                                                                                                   | EC:1.1.1.42               |
| vo_c1_Locus_11109_Transcript_8/9_Confidence_0.600_Length_4491   | -0,5732894 | 0,034315221 | kcnh2_human ame: full=potassium voltage-gated channel subfamily h member 2 ame: full=eag homolog ame: full=ether-a-go-go-related gene potassium channel 1 short=erg-1 short=eag-related protein 1 short=ether-a-go-go-related protein 1 short=h-erg short=herg-1 short=herg1 ame: full=voltage-gated potassium channel subunit | -                         |
| vo_n2_Locus_1515_Transcript_20/24_Confidence_0.103_Length_4140  | -0,5813126 | 0,000455968 | fks1_crynh ame: full= -beta-glucan synthase component fks1                                                                                                                                                                                                                                                                     | EC:2.7.11;<br>EC:2.4.1.34 |
| vo_c2_Locus_4642_Transcript_1/2_Confidence_0.333_Length_1565    | -0,6032733 | 0,000175679 | aml1_arath ame: full=protein mei2-like 1 short=aml1 ame: full=mei2-like protein 1                                                                                                                                                                                                                                              | -                         |

|                                                                |            |             |                                                                                                                                                                                                                                                                                                                            |           |
|----------------------------------------------------------------|------------|-------------|----------------------------------------------------------------------------------------------------------------------------------------------------------------------------------------------------------------------------------------------------------------------------------------------------------------------------|-----------|
| tri_c_comp10077_c0_seq1                                        | -0,6138635 | 0,034627737 | kcnh6_human ame: full=potassium voltage-gated channel subfamily h member 6 ame: full=ether-a-go-go-related gene potassium channel 2 short=erg-2 short=eag-related protein 2 short=ether-a-go-go-related protein 2 short=herg-2 short=herg2 ame: full=voltage-gated potassium channel subunit                               | -         |
| vo_n2_Locus_2148_Transcript_1/1_Confidence_0.000_Length_3586   | -0,6187105 | 0,005166346 | kcae_drome ame: full=potassium voltage-gated channel protein eag ame: full=ether-a-go-go protein                                                                                                                                                                                                                           | -         |
| tri_n_comp57238_c0_seq1                                        | -0,6780797 | 0,022189548 | cnga1_human ame: full=cgmp-gated cation channel alpha-1 ame: full=cyclic nucleotide-gated cation channel 1 ame: full=cyclic nucleotide-gated channel alpha-1 short=cng channel alpha-1 short=cng-1 short=cng1 ame: full=cyclic nucleotide-gated photoreceptor ame: full=rod photoreceptor cgmp-gated channel subunit alpha | -         |
| vo_n2_Locus_713_Transcript_13/28_Confidence_0.321_Length_2527  | -0,7421177 | 0,010964152 | y326_metja ame: full= permease mj0326                                                                                                                                                                                                                                                                                      | -         |
| tri_n_comp58611_c0_seq1                                        | -0,7691416 | 0,000898441 | pk2_dicdi ame: full=protein kinase 2 short=pk2                                                                                                                                                                                                                                                                             | EC:2.7.11 |
| tri_c_comp19120_c0_seq2                                        | -0,9386599 | 0,00200196  | y326_metja ame: full= permease mj0326                                                                                                                                                                                                                                                                                      | -         |
| tri_c_comp14057_c0_seq1                                        | -3,9637236 | 0,041264197 | m3k7l_drome ame: full= mitogen-activated protein kinase kinase kinase 7-like                                                                                                                                                                                                                                               | -         |
| tri_c_comp16850_c0_seq7                                        | -4,0023428 | 0,044970833 | tydp1_human ame: full=tyrosyl-dna phosphodiesterase 1 short=tyr-dna phosphodiesterase 1                                                                                                                                                                                                                                    |           |
| vo_c1_Locus_26724_Transcript_2/11_Confidence_0.571_Length_1308 | -4,016307  | 0,038417345 | eri1_rat ame: full=3 -5 exoribonuclease 1 ame: full=histone mrna 3 - exonuclease 1                                                                                                                                                                                                                                         | EC:3.1.13 |
| vo_c3_Locus_17701_Transcript_5/6_Confidence_0.222_Length_1749  | -4,0377185 | 0,040614214 | ilvi_salty ame: full=acetolactate synthase isozyme 3 large subunit ame: full=ahas-iii ame: full=als-iii ame: full=acetoxy-acid synthase iii large subunit                                                                                                                                                                  |           |
| tri_c_comp19658_c1_seq3                                        | -4,0703976 | 0,048356611 | arap3_mouse ame: full=arf-gap with rho-gap ank repeat and ph domain-containing protein 3 ame: full=centaurin-delta-3 short=cnt-d3 ame: full=dual specificity rho- and arf-gtpase-activating protein 1                                                                                                                      |           |
| vo_c3_Locus_3763_Transcript_1/4_Confidence_0.375_Length_285    | -4,0847487 | 0,016861725 | ---NA---                                                                                                                                                                                                                                                                                                                   |           |

|                                                                 |            |             |                                                                                                                                                                                                                                              |           |
|-----------------------------------------------------------------|------------|-------------|----------------------------------------------------------------------------------------------------------------------------------------------------------------------------------------------------------------------------------------------|-----------|
| vo_c3_Locus_2504_Transcript_24/34_Confidence_0.330_Length_1270  | -4,0866014 | 0,049309357 | mst4_human ame: full=serine threonine-protein kinase mst4 ame: full=mammalian ste20-like protein kinase 4 short=mst-4 ame: full=mst3 and sok1-related kinase ame: full=ste20-like kinase mst4 ame: full=serine threonine-protein kinase mask | EC:2.7.11 |
| vo_c1_Locus_8568_Transcript_1/2_Confidence_0.750_Length_1624    | -4,1084381 | 0,013639185 | bh013_arath ame: full=transcription factor bhlh13 ame: full=basic helix-loop-helix protein 13 short= 13 short=bhlh 13 ame: full=transcription factor en 39 ame: full=bhlh transcription factor bhlh013                                       |           |
| vo_c3_Locus_2570_Transcript_8/49_Confidence_0.062_Length_4245   | -4,1268874 | 0,022012691 | y6689_dicdi ame: full=protein ddb_g0276689                                                                                                                                                                                                   | -         |
| vo_n1_Locus_1154_Transcript_68/131_Confidence_0.027_Length_2639 | -4,1347009 | 0,032439123 | rp25l_mouse ame: full=ribonuclease p protein subunit p25-like protein short=rnase p protein subunit-like p25 ame: full=rpp25-like protein                                                                                                    | -         |
| tri_c_comp20063_c0_seq11                                        | -4,1383802 | 0,024961718 | spo22_yeast ame: full=sporulation-specific protein 22                                                                                                                                                                                        |           |
| vo_c1_Locus_13264_Transcript_4/7_Confidence_0.467_Length_2394   | -4,1441967 | 0,037284653 | fmn13_mouse ame: full=formin-like protein 3                                                                                                                                                                                                  |           |
| tri_c_comp44583_c0_seq1                                         | -4,171994  | 0,035016479 | coca1_chick ame: full=collagen alpha-1 chain ame: full=fibrochimerin flags: precursor                                                                                                                                                        |           |
| vo_c1_Locus_31_Transcript_272/1155_Confidence_0.009_Length_1491 | -4,2020786 | 0,031240268 | fcpa_macpy ame: full=fucoxanthin-chlorophyll a-c binding protein chloroplastic flags: precursor                                                                                                                                              | -         |
| tri_c_comp20609_c0_seq12                                        | -4,2542164 | 0,016861725 | lac8_arath ame: full=laccase-8 ame: full=benzenediol:oxygen oxidoreductase 8 ame: full=diphenol oxidase 8 ame: full=urishiol oxidase 8 flags: precursor                                                                                      |           |
| vo_c1_Locus_103_Transcript_38/42_Confidence_0.156_Length_1066   | -4,2565264 | 0,024445611 | rgpa1_rat ame: full=ral gtpase-activating protein subunit alpha-1 ame: full=gap-related-interacting partner to e12 short=gripe ame: full=gtpase-activating domain-like 1 ame: full=tuberin-like protein 1 ame: full=p240                     |           |
| vo_c3_Locus_2096_Transcript_2/10_Confidence_0.125_Length_2147   | -4,2604135 | 0,01511993  | ---NA---                                                                                                                                                                                                                                     |           |
| tri_n_comp20796_c0_seq13                                        | -4,2682556 | 0,0154194   | if2_cloph ame: full=translation initiation factor if-2                                                                                                                                                                                       |           |
| vo_c3_Locus_291_Transcript_10/90_Confidence_0.022_Length_2582   | -4,2711539 | 0,015422492 | soffb_dicdi ame: full=soff complex subunit b homolog                                                                                                                                                                                         | -         |

|                                                                 |            |             |                                                                                                                                                                                                                                                                    |            |
|-----------------------------------------------------------------|------------|-------------|--------------------------------------------------------------------------------------------------------------------------------------------------------------------------------------------------------------------------------------------------------------------|------------|
| vo_n1_Locus_734_Transcript_24/29_Confidence_0.236_Length_1766   | -4,2829986 | 0,021847292 | df142_arath ame: full= defensin-like protein 142 ame: full= low-molecular-weight cysteine-rich protein 34 short=protein lcr34 flags: precursor                                                                                                                     |            |
| vo_c1_Locus_2693_Transcript_1/1_Confidence_0.000_Length_706     | -4,2998795 | 0,018233577 | nog2_schpo ame: full=nucleolar gtp-binding protein 2                                                                                                                                                                                                               |            |
| vo_c2_Locus_19170_Transcript_2/2_Confidence_0.000_Length_742    | -4,3275444 | 0,008892159 | dod_drome ame: full= peptidyl-prolyl cis-trans isomerase dodo short=ppiase dodo ame: full=rotamase dodo                                                                                                                                                            | EC:5.2.1.8 |
| tri_n_comp20618_c0_seq20                                        | -4,3322507 | 0,016861725 | upp_chrsd ame: full=uracil phosphoribosyltransferase ame: full=ump pyrophosphorylase ame: full=uprtase                                                                                                                                                             |            |
| vo_n1_Locus_216_Transcript_40/55_Confidence_0.104_Length_2361   | -4,3345289 | 0,016861725 | muty_mycto ame: full=a g-specific adenine glycosylase                                                                                                                                                                                                              |            |
| vo_n2_Locus_3_Transcript_4226/24291_Confidence_0.000_Length_427 | -4,3416996 | 0,015432585 | murd_causk ame: full=udp-n-acetylmuramoylalanine--d-glutamate ligase ame: full=d-glutamic acid-adding enzyme ame: full=udp-n-acetylmuramoyl-l-alanyl-d-glutamate synthetase                                                                                        |            |
| vo_c1_Locus_18312_Transcript_1/1_Confidence_0.000_Length_295    | -4,4002792 | 0,006382506 | opgg_niteu ame: full=glucans biosynthesis protein g flags: precursor                                                                                                                                                                                               |            |
| vo_c3_Locus_950_Transcript_16/59_Confidence_0.031_Length_783    | -4,4077084 | 0,009884449 | ---NA---                                                                                                                                                                                                                                                           |            |
| vo_c1_Locus_7775_Transcript_2/3_Confidence_0.667_Length_915     | -4,42187   | 0,009895515 | glmm_psef5 ame: full=phosphoglucosamine mutase                                                                                                                                                                                                                     |            |
| tri_c_comp23668_c0_seq1                                         | -4,4264219 | 0,005547491 | f10a1_arath ame: full=fam10 family protein at4g22670                                                                                                                                                                                                               | -          |
| vo_c3_Locus_31_Transcript_32/79_Confidence_0.035_Length_3193    | -4,5580505 | 0,002890162 | yg35_yeast ame: full=uncharacterized vacuolar membrane protein ygr125w                                                                                                                                                                                             |            |
| vo_c1_Locus_11474_Transcript_18/25_Confidence_0.222_Length_1308 | -4,5593642 | 0,002225433 | te1_maize ame: full=protein terminal ear1                                                                                                                                                                                                                          | -          |
| tri_c_comp21200_c0_seq4                                         | -4,5677281 | 0,004520248 | tsad_cuptr ame: full=trna n6-adenosine threonylcarbamoyltransferase ame: full=n6-l-threonylcarbamoyladenine synthase short=t a synthase ame: full=t a37 threonylcarbamoyladenine biosynthesis protein ame: full=trna threonylcarbamoyladenine biosynthesis protein |            |

|                                                                   |            |             |                                                                                                                                                                                                                                                            |             |
|-------------------------------------------------------------------|------------|-------------|------------------------------------------------------------------------------------------------------------------------------------------------------------------------------------------------------------------------------------------------------------|-------------|
| vo_c1_Locus_15341_Transcript_4/4_Confidence_0.333_Length_950      | -4,5717868 | 0,002644891 | ftsh2_therp ame: full=atp-dependent zinc metalloprotease 2                                                                                                                                                                                                 |             |
| tri_c_comp19736_c0_seq15                                          | -4,5744917 | 0,001755161 | nrt_drome ame: full=neurotactin                                                                                                                                                                                                                            | -           |
| tri_c_comp2038_c0_seq1                                            | -4,604734  | 0,003403828 | idhp_pig ame: full=isocitrate dehydrogenase                                                                                                                                                                                                                |             |
| vo_n1_Locus_8670_Transcript_15/23_Confidence_0.500_Length_5737    | -4,6101634 | 0,003453619 | hs3s4_human ame: full=heparan sulfate glucosamine 3-o-sulfotransferase<br>4 ame: full=heparan sulfate d-glucosaminyl 3-o-sulfotransferase 4 short=3-ost-4 short=heparan sulfate 3-o-sulfotransferase 4 short=h3-ost-4                                      |             |
| vo_c1_Locus_13749_Transcript_3/5_Confidence_0.500_Length_2621     | -4,6218076 | 0,003062513 | dnaj_trow8 ame: full=chaperone protein                                                                                                                                                                                                                     | -           |
| tri_c_comp5651_c0_seq1                                            | -4,6439651 | 0,001381403 | y187_brebn ame: full= atp:guanido phosphotransferase bbr47_01870                                                                                                                                                                                           |             |
| tri_c_comp19424_c0_seq3                                           | -4,6505002 | 0,001137135 | goga4_human ame: full=golgin subfamily a member 4 ame: full=256 kda golgin ame: full=golgin-245 ame: full=protein ame: full=trans-golgi p230                                                                                                               |             |
| vo_c2_Locus_9868_Transcript_4/8_Confidence_0.667_Length_2885      | -4,665172  | 0,001207847 | ano7_rat ame: full=anoctamin-7 ame: full=new gene expressed in prostate homolog ame: full=transmembrane protein 16g                                                                                                                                        | -           |
| vo_n1_Locus_678_Transcript_14/19_Confidence_0.340_Length_1076     | -4,6718482 | 0,002234295 | rl9_orysj ame: full=60s ribosomal protein l9                                                                                                                                                                                                               | -           |
| vo_n1_Locus_5719_Transcript_37/41_Confidence_0.500_Length_5524    | -4,6772437 | 0,00179619  | pi5k6_arath ame: full=phosphatidylinositol 4-phosphate 5-kinase 6 short=5k6 ame: full=1-phosphatidylinositol 4-phosphate kinase 6 ame: full=diphosphoinositide kinase 6 ame: full= ns p-5-kinase 6                                                         | EC:2.7.1.68 |
| vo_n1_Locus_10454_Transcript_5/5_Confidence_0.143_Length_3714     | -4,687121  | 0,001926888 | ure1_rhie6 ame: full=urease subunit alpha ame: full=urea amidohydrolase subunit alpha                                                                                                                                                                      |             |
| vo_n2_Locus_3_Transcript_21438/24291_Confidence_0.000_Length_1004 | -4,7356165 | 0,00125422  | foxn4_xenla ame: full=forkhead box protein n4                                                                                                                                                                                                              |             |
| vo_n3_Locus_3273_Transcript_19/31_Confidence_0.157_Length_6208    | -4,7483112 | 0,001297948 | pag_bacan ame: full=protective antigen short=pa ame: full=anthrax toxins translocating protein ame: full=pa-83 short=pa83 contains: ame: full=protective antigen pa-20 short=pa20 contains: ame: full=protective antigen pa-63 short=pa63 flags: precursor |             |

|                                                                     |            |             |                                                                                                                                                                                                                                      |           |
|---------------------------------------------------------------------|------------|-------------|--------------------------------------------------------------------------------------------------------------------------------------------------------------------------------------------------------------------------------------|-----------|
| vo_c2_Locus_6903_Transcript_12/49_Confidence_0.355_Length_6039      | -4,7576215 | 0,001014085 | vat1_danre ame: full=synaptic vesicle membrane protein vat-1 homolog                                                                                                                                                                 | -         |
| vo_c1_Locus_5025_Transcript_2/9_Confidence_0.690_Length_478         | -4,7684255 | 0,00125422  | catr_schdu ame: full=caltractin ame: full=centrin                                                                                                                                                                                    | -         |
| vo_c1_Locus_1697_Transcript_1/6_Confidence_0.273_Length_11684       | -4,7822722 | 0,00110171  | dek1_orysj ame: full=calpain-type cysteine protease adl1 ame: full=phyto-calpain adl1 ame: full=protein adaxialized leaf1 ame: full=protein defective kernel 1 short= 1 ame: full=protein shootless 3 flags: precursor               |           |
| vo_c3_Locus_33886_Transcript_1/1_Confidence_0.000_Length_922        | -4,841865  | 0,000513901 | syr_ralso ame: full=arginine--trna ligase ame: full=arginyl-trna synthetase short=                                                                                                                                                   |           |
| tri_n_comp9316_c0_seq2                                              | -4,8703084 | 0,000469136 | ---NA---                                                                                                                                                                                                                             |           |
| vo_c1_Locus_21325_Transcript_1/3_Confidence_0.250_Length_371        | -4,8784872 | 0,000469136 | mura_olico ame: full=udp-n-acetylglucosamine 1-carboxyvinyltransferase ame: full=enolpyruvate transferase ame: full=udp-n-acetylglucosamine enolpyruvyl transferase short=ept                                                        |           |
| vo_c2_Locus_23160_Transcript_16/16_Confidence_0.238_Length_329<br>2 | -4,8785246 | 0,000470656 | pcsk5_human ame: full=proprotein convertase subtilisin kexin type 5 ame: full=proprotein convertase 5 short=pc5 ame: full=proprotein convertase 6 short=pc6 short=hpc6 ame: full=subtilisin kexin-like protease pc5 flags: precursor | EC:3.4.21 |
| tri_c_comp17100_c0_seq5                                             | -4,8940477 | 0,000420263 | y3475_arath ame: full=probable lrr receptor-like serine threonine-protein kinase at3g47570 flags: precursor                                                                                                                          | -         |
| vo_c3_Locus_14253_Transcript_15/18_Confidence_0.184_Length_125<br>7 | -4,8955307 | 0,000502091 | yhfe_bacsu ame: full= aminopeptidase                                                                                                                                                                                                 |           |
| vo_c2_Locus_15438_Transcript_6/11_Confidence_0.357_Length_2407      | -4,9310049 | 0,000219152 | chmp3_rat ame: full=charged multivesicular body protein 3 ame: full=chromatin-modifying protein 3 ame: full=vacuolar protein sorting-associated protein 24 short=rvps24p                                                             | -         |
| vo_n1_Locus_187_Transcript_69/100_Confidence_0.030_Length_569       | -4,9538836 | 0,000322732 | rl27b_yeast ame: full=60s ribosomal protein l27-b                                                                                                                                                                                    | -         |
| vo_c2_Locus_2195_Transcript_2/4_Confidence_0.816_Length_13071       | -4,9619934 | 0,000305504 | dyh7_rat ame: full=dynein heavy chain axonemal ame: full=axonemal beta dynein heavy chain 7 ame: full=axonemal dynein heavy chain b ame: full=ciliary dynein heavy chain 7 ame: full=dynein-like protein 7                           | -         |
| vo_c1_Locus_3318_Transcript_22/22_Confidence_0.027_Length_480       | -4,9658062 | 0,000289634 | gbpa_vibpa ame: full= c-binding protein a flags: precursor                                                                                                                                                                           |           |

|                                                                |            |             |                                                                                                                                                                      |                      |
|----------------------------------------------------------------|------------|-------------|----------------------------------------------------------------------------------------------------------------------------------------------------------------------|----------------------|
| vo_n1_Locus_7785_Transcript_6/10_Confidence_0.562_Length_1374  | -4,9742689 | 0,000209806 | xerc_ross1 ame: full=tyrosine recombinase                                                                                                                            |                      |
| vo_c2_Locus_9557_Transcript_1/3_Confidence_0.750_Length_3758   | -4,9751331 | 9,11E-05    | tpm_boomi ame: full=tropomyosin                                                                                                                                      |                      |
| tri_c_comp20609_c0_seq10                                       | -4,993492  | 0,000250167 | ---NA---                                                                                                                                                             |                      |
| vo_n1_Locus_913_Transcript_37/48_Confidence_0.315_Length_914   | -5,0014804 | 0,000192425 | bud4_ashgo ame: full=bud site selection protein 4 homolog                                                                                                            |                      |
| tri_c_comp21276_c0_seq15                                       | -5,0316109 | 7,25E-05    | wbs22_dicdi ame: full=probable methyltransferase wbscr22 homolog                                                                                                     |                      |
| tri_c_comp30303_c0_seq1                                        | -5,0535461 | 0,00010133  | ---NA---                                                                                                                                                             |                      |
| vo_c3_Locus_6126_Transcript_5/9_Confidence_0.667_Length_2660   | -5,0605608 | 0,000125979 | cul3_rat ame: full=cullin-3                                                                                                                                          | -                    |
| tri_c_comp17992_c0_seq9                                        | -5,0662003 | 6,85E-05    | cb043_human ame: full=upf0554 protein c2orf43                                                                                                                        |                      |
| vo_c2_Locus_9414_Transcript_9/10_Confidence_0.200_Length_798   | -5,1008826 | 6,54E-05    | gt253_bovin ame: full=probable inactive glycosyltransferase 25 family member 3 ame: full=cerebral endothelial cell adhesion molecule flags: precursor                |                      |
| vo_c1_Locus_3347_Transcript_32/55_Confidence_0.134_Length_3787 | -5,1258629 | 5,27E-05    | m3k7_ponab ame: full=mitogen-activated protein kinase kinase kinase 7                                                                                                | EC:2.7.11;<br>EC:3.4 |
| vo_c1_Locus_19495_Transcript_1/3_Confidence_0.200_Length_1414  | -5,133821  | 5,02E-05    | prax_mouse ame: full=periaxin                                                                                                                                        |                      |
| tri_c_comp7251_c0_seq2                                         | -5,1550758 | 1,88E-05    | ube4b_human ame: full=ubiquitin conjugation factor e4 b ame: full=homozygously deleted in neuroblastoma 1 ame: full=ubiquitin fusion degradation protein 2           |                      |
| vo_c3_Locus_6426_Transcript_2/2_Confidence_0.250_Length_1098   | -5,1793439 | 3,33E-05    | fl2d_danre ame: full=pre-mrna-splicing regulator wtap ame: full=female-lethal d homolog ame: full=wt1-associated protein ame: full=wilms tumor 1-associating protein | -                    |
| vo_c1_Locus_31_Transcript_1137/1155_Confidence_0.029_Length_42 | -5,2158844 | 3,93E-05    | fcpb_macpy ame: full=fucoxanthin-chlorophyll a-c binding protein chloroplastic flags: precursor                                                                      | -                    |



|                                                                 |            |          |                                                                                                                                                                                                                                                                                                  |   |
|-----------------------------------------------------------------|------------|----------|--------------------------------------------------------------------------------------------------------------------------------------------------------------------------------------------------------------------------------------------------------------------------------------------------|---|
| vo_c3_Locus_4574_Transcript_2/2_Confidence_0.000_Length_358     | -5,2158844 | 3,93E-05 | dnp4_arath ame: full=probable sal4 phosphatase ame: full=3 (2) -bisphosphate nucleotidase 4 ame: full=3 (2) -bisphosphonucleoside 3 (2) -phosphohydrolase 4 ame: full=dnpase 4 ame: full=inositol polyphosphate 1-phosphatase 4 short=ippase 4 ame: full=inositol- -bisphosphate 1-phosphatase 4 |   |
| vo_c1_Locus_18404_Transcript_3/6_Confidence_0.156_Length_7696   | -5,2295594 | 3,53E-05 | vp13e_dicdi ame: full= vacuolar protein sorting-associated protein 13e                                                                                                                                                                                                                           | - |
| vo_c2_Locus_2249_Transcript_4/4_Confidence_0.200_Length_632     | -5,2347844 | 3,33E-05 | star3_danre ame: full= -related lipid transfer protein 3 ame: full=mln64-like protein ame: full=start domain-containing protein 3 short= 3                                                                                                                                                       |   |
| vo_n1_Locus_29_Transcript_412/1145_Confidence_0.012_Length_3945 | -5,2632852 | 1,47E-05 | otogl_human ame: full=otogelin-like protein flags: precursor                                                                                                                                                                                                                                     |   |
| vo_n1_Locus_153_Transcript_6/12_Confidence_0.238_Length_1610    | -5,2965121 | 1,20E-05 | huwe1_mouse ame: full=e3 ubiquitin-protein ligase huwe1 ame: full=e3histone ame: full= uba and wwe domain-containing protein 1 ame: full=upstream regulatory element-binding protein 1 short=ure-b1 short=ure-binding protein 1                                                                  |   |
| vo_c1_Locus_35331_Transcript_1/4_Confidence_0.938_Length_822    | -5,3264624 | 6,76E-06 | ---NA---                                                                                                                                                                                                                                                                                         |   |
| vo_n2_Locus_1294_Transcript_19/21_Confidence_0.238_Length_1084  | -5,3744602 | 6,76E-06 | fxyd4_human ame: full=fxyd domain-containing ion transport regulator 4 flags: precursor                                                                                                                                                                                                          |   |
| vo_c3_Locus_1194_Transcript_16/22_Confidence_0.235_Length_1025  | -5,4441534 | 4,46E-06 | chl1_zygr ame: full=light-independent protochlorophyllide reductase iron-sulfur atp-binding protein short=dpor subunit I short=li-por subunit I                                                                                                                                                  | - |
| vo_c2_Locus_2645_Transcript_1/2_Confidence_0.333_Length_2635    | -5,4493412 | 3,08E-06 | ---NA---                                                                                                                                                                                                                                                                                         |   |
| tri_c_comp19146_c0_seq2                                         | -5,4689976 | 2,58E-06 | rasl2_human ame: full=ras gtpase-activating protein 4 ame: full=calcium-promoted ras inactivator ame: full=ras p21 protein activator 4 ame: full=activating-like protein 2                                                                                                                       | - |
| vo_c1_Locus_20303_Transcript_1/3_Confidence_0.200_Length_1013   | -5,4986546 | 1,94E-06 | ccm1_yeast ame: full=mitochondrial group i intron splicing factor ccm1 ame: full=cob and cox1 mrna maturation protein 1 ame: full=required for respiratory growth protein 2 flags: precursor                                                                                                     |   |

|                                                                  |            |          |                                                                                                                                                                                                                                                                                           |                             |
|------------------------------------------------------------------|------------|----------|-------------------------------------------------------------------------------------------------------------------------------------------------------------------------------------------------------------------------------------------------------------------------------------------|-----------------------------|
| vo_n2_Locus_3_Transcript_18921/24291_Confidence_0.000_Length_847 | -5,5016389 | 2,49E-06 | eutc_xanc8 ame: full=ethanolamine ammonia-lyase light chain ame: full=ethanolamine ammonia-lyase small subunit                                                                                                                                                                            |                             |
| vo_c1_Locus_10050_Transcript_2/2_Confidence_0.000_Length_733     | -5,5961209 | 8,93E-07 | mok11_schpo ame: full=cell wall alpha- glucan synthase mok11                                                                                                                                                                                                                              |                             |
| tri_c_comp19834_c0_seq2                                          | -5,6652781 | 2,66E-07 | y3030_ralso ame: full=upf0192 protein rsc3030 flags: precursor                                                                                                                                                                                                                            | -                           |
| vo_n1_Locus_3505_Transcript_1/9_Confidence_0.250_Length_854      | -5,6965116 | 2,66E-07 | roc1_arath ame: full=ribonucleoprotein chloroplastic flags: precursor                                                                                                                                                                                                                     | -                           |
| vo_c1_Locus_788_Transcript_5/34_Confidence_0.340_Length_1423     | -5,7096872 | 1,74E-07 | pgky_wheat ame: full=phosphoglycerate cytosolic                                                                                                                                                                                                                                           | EC:2.7.2.3                  |
| vo_c1_Locus_28880_Transcript_1/1_Confidence_0.000_Length_259     | -5,7101271 | 1,52E-07 | ispe_brebn ame: full=4-diphosphocytidyl-2-c-methyl-d-erythritol kinase short=cmk ame: full=4-(cytidine-5 -diphospho)-2-c-methyl-d-erythritol kinase                                                                                                                                       |                             |
| vo_c1_Locus_754_Transcript_7/11_Confidence_0.250_Length_1706     | -5,7777633 | 1,04E-07 | ucri_synsc ame: full=cytochrome b6-f complex iron-sulfur subunit ame: full=plastohydroquinone:plastocyanin oxidoreductase iron-sulfur protein short=isp short=risp ame: full=rieske iron-sulfur protein                                                                                   | EC:1.10.9.1;<br>EC:1.10.2.2 |
| vo_c2_Locus_8643_Transcript_13/30_Confidence_0.208_Length_6402   | -5,8271265 | 5,53E-08 | pag_bacan ame: full=protective antigen short=pa ame: full=anthrax toxins translocating protein ame: full=pa-83 short=pa83 contains: ame: full=protective antigen pa-20 short=pa20 contains: ame: full=protective antigen pa-63 short=pa63 flags: precursor                                |                             |
| tri_c_comp18645_c0_seq15                                         | -5,8754594 | 2,34E-08 | miaa_ruepo ame: full=trna dimethylallyltransferase ame: full=dimethylallyl diphosphate:trna dimethylallyltransferase short=dmapp:trna dimethylallyltransferase short=dmataase ame: full=isopentenyl-diphosphate:trna isopentenyltransferase short=ipp transferase short=ippt short=iptase | -                           |
| vo_c1_Locus_1583_Transcript_36/50_Confidence_0.307_Length_1248   | -5,9197652 | 1,55E-08 | hair_rat ame: full=lysine-specific demethylase hairless                                                                                                                                                                                                                                   |                             |
| vo_n2_Locus_3_Transcript_4251/24291_Confidence_0.000_Length_957  | -6,0237006 | 2,45E-09 | fcpb_macpy ame: full=fucoxanthin-chlorophyll a-c binding protein chloroplastic flags: precursor                                                                                                                                                                                           | -                           |

|                                                                |            |             |                                                                                                                                                                                                                                                                                        |                             |
|----------------------------------------------------------------|------------|-------------|----------------------------------------------------------------------------------------------------------------------------------------------------------------------------------------------------------------------------------------------------------------------------------------|-----------------------------|
| vo_c1_Locus_5520_Transcript_11/15_Confidence_0.316_Length_1184 | -6,1684164 | 2,06E-10    | ---NA---                                                                                                                                                                                                                                                                               |                             |
| vo_n1_Locus_888_Transcript_30/39_Confidence_0.387_Length_1527  | -6,302068  | 0,006226802 | dtd_bdeba ame: full=d-tyrosyl-trna deacylase                                                                                                                                                                                                                                           |                             |
| tri_c_comp31150_c0_seq1                                        | -6,3585216 | 3,25E-12    | ---NA---                                                                                                                                                                                                                                                                               |                             |
| vo_c1_Locus_23313_Transcript_1/1_Confidence_0.000_Length_1456  | -6,4198624 | 2,64E-12    | no66_drope ame: full=bifunctional lysine-specific demethylase and histidyl-hydroxylase no66 ame: full=histone lysine demethylase no66                                                                                                                                                  |                             |
| tri_c_comp18645_c0_seq21                                       | -6,4882054 | 2,18E-13    | miaa_ruepo ame: full=trna dimethylallyltransferase ame: full=dimethylallyl diphosphate:trna dimethylallyltransferase short=dmap:trna dimethylallyltransferase short=dmatase ame: full=isopentenyl-diphosphate:trna isopentenyltransferase short=ipp transferase short=ipp short=iptase | -                           |
| vo_c1_Locus_7662_Transcript_13/16_Confidence_0.149_Length_4207 | -6,8054197 | 2,65E-15    | if2p_human ame: full=eukaryotic translation initiation factor 5b short=eif-5b ame: full=translation initiation factor if-2                                                                                                                                                             | -                           |
| vo_c3_Locus_1421_Transcript_4/4_Confidence_0.125_Length_941    | -6,8546    | 8,49E-15    | rsmg_agrvs ame: full=ribosomal rna small subunit methyltransferase g ame: full=16s rna 7-methylguanosine methyltransferase short=16s rna m7g methyltransferase                                                                                                                         |                             |
| vo_c2_Locus_17796_Transcript_2/4_Confidence_0.429_Length_3172  | -6,9393897 | 9,34E-17    | sr140_mouse ame: full=u2 snrnp-associated surp motif-containing protein ame: full=140 kda ser arg-rich domain protein ame: full=u2-associated protein sr140                                                                                                                            | -                           |
| vo_c1_Locus_242_Transcript_37/44_Confidence_0.372_Length_935   | -7,0330204 | 1,29E-17    | arf_vigun ame: full=adp-ribosylation factor                                                                                                                                                                                                                                            | -                           |
| vo_c1_Locus_947_Transcript_1/7_Confidence_0.286_Length_2009    | -7,2300493 | 4,02E-20    | hmox2_macfa ame: full=heme oxygenase 2 short=ho-2                                                                                                                                                                                                                                      | EC:1.14.99.3;<br>EC:3.1.4.4 |
| tri_c_comp40688_c0_seq1                                        | -7,3404701 | 3,60E-23    | chln_proma ame: full=light-independent protochlorophyllide reductase subunit n short=dpor subunit n short=li-por subunit n                                                                                                                                                             |                             |

---

**Supplementary Table S10. List of KEGG pathways associated to contigs with assigned enzyme codes in up-regulated DEGs.** The table contains pathway names, pathway ID, number of enzymes found for each pathway, enzyme codes and sequence names.

| Pathway                                     | Pathway ID | #Enzs in Pathway | Enzyme                                                           | #Seqs of Enzyme | Seqs                                                                                                                         |
|---------------------------------------------|------------|------------------|------------------------------------------------------------------|-----------------|------------------------------------------------------------------------------------------------------------------------------|
| Nitrogen metabolism                         | map00910   | 2                | ec:1.7.1.1 - reductase (NADH), ec:1.7.1.4 - reductase [NAD(P)H]  | 1, 1            | tri_n_comp24956_c0_seq1, vo_n2_Locus_128_Transcript_8/33_Confidence_0.085_Length_4154                                        |
| Pyruvate metabolism                         | map00620   | 2                | ec:1.1.1.37 - dehydrogenase, ec:1.1.1.82 - dehydrogenase (NADP+) | 1, 1            | vo_c1_Locus_7371_Transcript_1/4_Confidence_0.500_Length_1352, vo_c1_Locus_7371_Transcript_1/4_Confidence_0.500_Length_1352   |
| Biosynthesis of antibiotics                 | map01130   | 2                | ec:1.1.1.37 - dehydrogenase, ec:1.1.1.35 - dehydrogenase         | 1, 1            | vo_c1_Locus_7371_Transcript_1/4_Confidence_0.500_Length_1352, vo_n2_Locus_636_Transcript_3/16_Confidence_0.306_Length_685    |
| Carbon fixation pathways in prokaryotes     | map00720   | 2                | ec:1.1.1.37 - dehydrogenase, ec:1.1.1.35 - dehydrogenase         | 1, 1            | vo_c1_Locus_7371_Transcript_1/4_Confidence_0.500_Length_1352, vo_n2_Locus_636_Transcript_3/16_Confidence_0.306_Length_685    |
| Fatty acid degradation                      | map00071   | 2                | ec:1.1.1.35 - dehydrogenase, ec:4.2.1.74 - hydratase             | 1, 1            | vo_n2_Locus_636_Transcript_3/16_Confidence_0.306_Length_685, vo_n2_Locus_636_Transcript_3/16_Confidence_0.306_Length_685     |
| Glycerolipid metabolism                     | map00561   | 2                | ec:2.3.1.20 - O-acyltransferase, ec:2.3.1.22 - O-acyltransferase | 1, 1            | vo_n2_Locus_19192_Transcript_2/2_Confidence_0.250_Length_3053, vo_n2_Locus_19192_Transcript_2/2_Confidence_0.250_Length_3053 |
| Fatty acid elongation                       | map00062   | 2                | ec:1.1.1.35 - dehydrogenase, ec:4.2.1.74 - hydratase             | 1, 1            | vo_n2_Locus_636_Transcript_3/16_Confidence_0.306_Length_685, vo_n2_Locus_636_Transcript_3/16_Confidence_0.306_Length_685     |
| Carbon fixation in photosynthetic organisms | map00710   | 2                | ec:1.1.1.37 - dehydrogenase, ec:1.1.1.82 - dehydrogenase (NADP+) | 1, 1            | vo_c1_Locus_7371_Transcript_1/4_Confidence_0.500_Length_1352, vo_c1_Locus_7371_Transcript_1/4_Confidence_0.500_Length_1352   |
| Phenylpropanoid biosynthesis                | map00940   | 1                | ec:1.11.1.7 - lactoperoxidase                                    | 1               | vo_c1_Locus_1107_Transcript_1/4_Confidence_0.143_Length_1311                                                                 |
| Glyoxylate and dicarboxylate metabolism     | map00630   | 1                | ec:1.1.1.37 - dehydrogenase                                      | 1               | vo_c1_Locus_7371_Transcript_1/4_Confidence_0.500_Length_1352                                                                 |
| Tryptophan metabolism                       | map00380   | 1                | ec:1.1.1.35 - dehydrogenase                                      | 1               | vo_n2_Locus_636_Transcript_3/16_Confidence_0.306_Length_685                                                                  |
| Lysine degradation                          | map00310   | 1                | ec:1.1.1.35 - dehydrogenase                                      | 1               | vo_n2_Locus_636_Transcript_3/16_Confidence_0.306_Length_685                                                                  |
| Caprolactam degradation                     | map00930   | 1                | ec:1.1.1.35 - dehydrogenase                                      | 1               | vo_n2_Locus_636_Transcript_3/16_Confidence_0.306_Length_685                                                                  |
| Butanoate metabolism                        | map00650   | 1                | ec:1.1.1.35 - dehydrogenase                                      | 1               | vo_n2_Locus_636_Transcript_3/16_Confidence_0.306_Length_685                                                                  |
| Various types of N-glycan biosynthesis      | map00513   | 1                | ec:2.4.1.101 - 2-beta-N-acetylglucosaminyltransferase            | 1               | vo_n2_Locus_19192_Transcript_2/2_Confidence_0.250_Length_3053                                                                |
| Primary bile acid biosynthesis              | map00120   | 1                | ec:1.1.1.35 - dehydrogenase                                      | 1               | vo_n2_Locus_636_Transcript_3/16_Confidence_0.306_Length_685                                                                  |

|                                            |          |   |                                                       |   |                                                               |
|--------------------------------------------|----------|---|-------------------------------------------------------|---|---------------------------------------------------------------|
| Cutin, suberine and wax biosynthesis       | map00073 | 1 | ec:2.3.1.20 - O-acyltransferase                       | 1 | vo_n2_Locus_19192_Transcript_2/2_Confidence_0.250_Length_3053 |
| Thiamine metabolism                        | map00730 | 1 | ec:3.6.1.15 - phosphatase                             | 1 | vo_n1_Locus_17075_Transcript_2/4_Confidence_0.400_Length_811  |
| Steroid hormone biosynthesis               | map00140 | 1 | ec:1.1.1.51 - 17)beta-hydroxysteroid dehydrogenase    | 1 | vo_n2_Locus_636_Transcript_3/16_Confidence_0.306_Length_685   |
| Cysteine and methionine metabolism         | map00270 | 1 | ec:1.1.1.37 - dehydrogenase                           | 1 | vo_c1_Locus_7371_Transcript_1/4_Confidence_0.500_Length_1352  |
| Purine metabolism                          | map00230 | 1 | ec:3.6.1.15 - phosphatase                             | 1 | vo_n1_Locus_17075_Transcript_2/4_Confidence_0.400_Length_811  |
| Steroid degradation                        | map00984 | 1 | ec:1.1.1.51 - 17)beta-hydroxysteroid dehydrogenase    | 1 | vo_n2_Locus_636_Transcript_3/16_Confidence_0.306_Length_685   |
| Geraniol degradation                       | map00281 | 1 | ec:1.1.1.35 - dehydrogenase                           | 1 | vo_n2_Locus_636_Transcript_3/16_Confidence_0.306_Length_685   |
| Valine, leucine and isoleucine degradation | map00280 | 1 | ec:1.1.1.35 - dehydrogenase                           | 1 | vo_n2_Locus_636_Transcript_3/16_Confidence_0.306_Length_685   |
| Benzoate degradation                       | map00362 | 1 | ec:1.1.1.35 - dehydrogenase                           | 1 | vo_n2_Locus_636_Transcript_3/16_Confidence_0.306_Length_685   |
| Other glycan degradation                   | map00511 | 1 | ec:3.2.1.24 - alpha-D-mannosidase                     | 1 | vo_n2_Locus_19192_Transcript_2/2_Confidence_0.250_Length_3053 |
| Methane metabolism                         | map00680 | 1 | ec:1.1.1.37 - dehydrogenase                           | 1 | vo_c1_Locus_7371_Transcript_1/4_Confidence_0.500_Length_1352  |
| Toluene degradation                        | map00623 | 1 | ec:1.1.1.35 - dehydrogenase                           | 1 | vo_n2_Locus_636_Transcript_3/16_Confidence_0.306_Length_685   |
| N-Glycan biosynthesis                      | map00510 | 1 | ec:2.4.1.101 - 2-beta-N-acetylglucosaminyltransferase | 1 | vo_n2_Locus_19192_Transcript_2/2_Confidence_0.250_Length_3053 |
| Citrate cycle (TCA cycle)                  | map00020 | 1 | ec:1.1.1.37 - dehydrogenase                           | 1 | vo_c1_Locus_7371_Transcript_1/4_Confidence_0.500_Length_1352  |

**Supplementary Table S11. List of KEGG pathways associated to contigs with assigned enzyme codes in down-regulated DEGs.** The table contains pathway names, pathway ID, number of enzymes found for each pathway, enzyme codes and sequence names.

| Pathway                                     | Pathway ID | #Enzs in Pathway | Enzyme                                                      | #Seqs of Enzyme | Seqs                                                                                                                            |
|---------------------------------------------|------------|------------------|-------------------------------------------------------------|-----------------|---------------------------------------------------------------------------------------------------------------------------------|
| Biosynthesis of antibiotics                 | map01130   | 2                | ec:1.1.1.42 - dehydrogenase (NADP+),<br>ec:2.7.2.3 - kinase | 1, 1            | vo_c1_Locus_5705_Transcript_16/19_Confidence_0.489_Length_4193,<br>vo_c1_Locus_788_Transcript_5/34_Confidence_0.340_Length_1423 |
| Inositol phosphate metabolism               | map00562   | 1                | ec:2.7.1.68 - 5-kinase                                      | 1               | vo_n1_Locus_5719_Transcript_37/41_Confidence_0.500_Length_5524                                                                  |
| Carbon fixation pathways in prokaryotes     | map00720   | 1                | ec:1.1.1.42 - dehydrogenase (NADP+)                         | 1               | vo_c1_Locus_5705_Transcript_16/19_Confidence_0.489_Length_4193                                                                  |
| Glycolysis / Gluconeogenesis                | map00010   | 1                | ec:2.7.2.3 - kinase                                         | 1               | vo_c1_Locus_788_Transcript_5/34_Confidence_0.340_Length_1423                                                                    |
| Glutathione metabolism                      | map00480   | 1                | ec:1.1.1.42 - dehydrogenase (NADP+)                         | 1               | vo_c1_Locus_5705_Transcript_16/19_Confidence_0.489_Length_4193                                                                  |
| Starch and sucrose metabolism               | map00500   | 1                | ec:2.4.1.34 - synthase                                      | 1               | vo_n2_Locus_1515_Transcript_20/24_Confidence_0.103_Length_4140                                                                  |
| Carbon fixation in photosynthetic organisms | map00710   | 1                | ec:2.7.2.3 - kinase                                         | 1               | vo_c1_Locus_788_Transcript_5/34_Confidence_0.340_Length_1423                                                                    |
| Oxidative phosphorylation                   | map00190   | 1                | ec:1.10.2.2 - reductase                                     | 1               | vo_c1_Locus_754_Transcript_7/11_Confidence_0.250_Length_1706                                                                    |
| Ether lipid metabolism                      | map00565   | 1                | ec:3.1.4.4 - D                                              | 1               | vo_c1_Locus_947_Transcript_1/7_Confidence_0.286_Length_2009                                                                     |
| Glycerophospholipid metabolism              | map00564   | 1                | ec:3.1.4.4 - D                                              | 1               | vo_c1_Locus_947_Transcript_1/7_Confidence_0.286_Length_2009                                                                     |
| Phosphatidylinositol signaling system       | map04070   | 1                | ec:2.7.1.68 - 5-kinase                                      | 1               | vo_n1_Locus_5719_Transcript_37/41_Confidence_0.500_Length_5524                                                                  |
| Photosynthesis                              | map00195   | 1                | ec:1.10.9.1 - reductase                                     | 1               | vo_c1_Locus_754_Transcript_7/11_Confidence_0.250_Length_1706                                                                    |
| Citrate cycle (TCA cycle)                   | map00020   | 1                | ec:1.1.1.42 - dehydrogenase (NADP+)                         | 1               | vo_c1_Locus_5705_Transcript_16/19_Confidence_0.489_Length_4193                                                                  |
